# Supplementary material for: Transcriptomic atlas of midbrain dopamine neurons uncovers differential vulnerability in a Parkinsonism lesion model
Source: eLife. 2024 Apr 8;12:RP89482. doi: 10.7554/eLife.89482 (PMC11001297; doi:10.7554/eLife.89482)
Supplement: Supplementary file 1. — Cluster markers for the “all-nuclei” dataset. [file elife-89482-supp1.xlsx]

## Sheet: readme
	test	Wilcoxon Rank Sum test
	assay	RNA
	slot	data
	gene logfc.threshold	0.25
	genes in min.pct	0.1

## Sheet: sampleinfo_AllNuclei
10X_Serial_ID	Sample_Name	NGI_ID	6OHDA dose ug/ul	gender	age	condition
10X_20_043	756 Lesion	P18856_3001	1.5	F	6mo	lesion
10X_20_044	756 Control	P18856_3002	na	F	6mo	intact
10X_20_045	735 Lesion	P18856_3003	0.7	F	6mo	lesion
10X_20_046	735 Control	P18856_3004	na	F	6mo	intact
10X_20_047	750 Lesion	P18856_3005	0.7	F	6mo	lesion
10X_20_048	750 Control	P18856_3006	na	F	6mo	intact
10X_20_049	754 Lesion	P18856_3007	1.5	F	6mo	lesion
10X_20_050	754 Control	P18856_3008	na	F	6mo	intact
10X_20_051	736 Lesion	P18856_3009	1.5	F	6mo	lesion
10X_20_052	736 Control	P18856_3010	na	F	6mo	intact
10X_20_053	749 Lesion	P18856_3011	0.7	F	6mo	lesion
10X_20_054	749 Control	P18856_3012	na	F	6mo	intact

## Sheet: sampleinfo_intact_wt
10X_Serial_ID	Sample_Name	NGI_ID	gender	age	condition
10X_20_044	756 Control	P18856_3002	F	6mo	intact
10X_20_046	735 Control	P18856_3004	F	6mo	intact
10X_20_048	750 Control	P18856_3006	F	6mo	intact
10X_20_050	754 Control	P18856_3008	F	6mo	intact
10X_20_052	736 Control	P18856_3010	F	6mo	intact
10X_20_054	749 Control	P18856_3012	F	6mo	intact
10X_19_009	454 untreated	na	F	3mo	untreated
10X_19_006	450 untreated	na	F	3mo	untreated
10X_19_008	449 untreated	na	F	3mo	untreated
10X_19_007	370 untreated	na	F	18mo	untreated
10X_19_010	358 untreated	na	F	18mo	untreated
10X_19_011	372 untreated	na	F	18mo	untreated

## Sheet: c_1
Column1	p_val	avg_log2FC	pct.1	pct.2	p_val_adj
Oprk1	0	0.297651	0.619	0.229	0
3110035E14Rik	0	-0.259011	0.05	0.199	0
Sgk3	0	-0.303836	0.153	0.327	0
Prex2	0	-0.546359	0.068	0.338	0
A830018L16Rik	0	-1.72035	0.345	0.692	0
Sulf1	0	-0.500342	0.105	0.272	0
Lactb2	0	0.360711	0.69	0.434	0
Kcnq5	0	-2.11689	0.532	0.73	0
Rims1	0	0.856322	0.991	0.958	0
Col19a1	0	-0.413922	0.039	0.207	0
Khdrbs2	0	-0.735291	0.87	0.828	0
Dst	0	0.343581	0.984	0.954	0
Myo1b	0	-0.320788	0.054	0.244	0
Mfsd6	0	0.44466	0.817	0.567	0
Hecw2	0	0.304444	0.958	0.892	0
Satb2	0	-0.558744	0.032	0.194	0
Spats2l	0	0.987939	0.879	0.568	0
Nbeal1	0	0.26909	0.913	0.812	0
Raph1	0	0.321676	0.918	0.815	0
Pard3b	0	-0.874356	0.224	0.39	0
Nrp2	0	-0.780299	0.079	0.476	0
Erbb4	0	1.02772	0.994	0.64	0
Vwc2l	0	1.84884	0.97	0.514	0
March4	0	0.689381	0.91	0.611	0
Epha4	0	0.544735	0.783	0.515	0
Serpine2	0	1.01836	0.776	0.324	0
Nyap2	0	0.88093	0.97	0.814	0
Agfg1	0	0.266602	0.845	0.699	0
Sphkap	0	0.450198	0.879	0.655	0
Pid1	0	0.536796	0.943	0.792	0
Lrrfip1	0	-0.36595	0.76	0.793	0
Cdh20	0	0.820957	0.798	0.359	0
En1	0	0.899425	0.829	0.196	0
Gm28928	0	-2.67113	0.103	0.36	0
Mgat5	0	-0.760766	0.569	0.749	0
R3hdm1	0	-0.567522	0.962	0.94	0
Thsd7b	0	-1.21159	0.321	0.56	0
Gm16083	0	0.523645	0.828	0.543	0
Lemd1	0	0.280515	0.408	0.174	0
Nav1	0	0.527248	0.954	0.861	0
Gm26936	0	0.761962	0.752	0.301	0
A430106G13Rik	0	0.328944	0.435	0.112	0
Kcnt2	0	-1.32925	0.215	0.581	0
4930590L20Rik	0	-0.291771	0.054	0.256	0
Brinp3	0	-1.82432	0.521	0.748	0
Edem3	0	0.255649	0.716	0.548	0
Colgalt2	0	0.757263	0.696	0.233	0
Rgl1	0	-0.448303	0.648	0.698	0
Cacna1e	0	0.328772	0.984	0.859	0
Brinp2	0	-0.593523	0.591	0.661	0
Tnr	0	-1.55364	0.644	0.818	0
Dnm3	0	0.251507	0.977	0.911	0
Atp1b1	0	-0.515013	0.92	0.921	0
Ildr2	0	-0.808898	0.386	0.626	0
Lmx1a	0	0.375174	0.506	0.247	0
Pbx1	0	1.60401	0.997	0.955	0
Nos1ap	0	1.49104	0.979	0.736	0
Kcnj9	0	-0.279102	0.102	0.319	0
Pld5	0	0.780937	0.62	0.357	0
Kif26b	0	0.683305	0.908	0.624	0
Cdc42bpa	0	-0.329448	0.943	0.934	0
Stum	0	-0.48826	0.075	0.349	0
Cnih3	0	-0.547877	0.042	0.334	0
Kcnh1	0	-0.763109	0.105	0.474	0
Camk1d	0	-0.775557	0.945	0.948	0
Celf2	0	-1.61488	0.978	0.965	0
Gm26565	0	-0.293338	0.052	0.244	0
Sfmbt2	0	-0.317018	0.126	0.312	0
Itga8	0	-0.43013	0.069	0.244	0
C1ql3	0	-0.657352	0.157	0.339	0
St8sia6	0	0.509679	0.552	0.178	0
Hacd1	0	0.413716	0.821	0.633	0
Cacnb2	0	0.422352	0.986	0.935	0
Plxdc2	0	-1.35382	0.354	0.615	0
Etl4	0	-1.34859	0.846	0.803	0
Gpr158	0	1.39745	0.991	0.939	0
Gad2	0	-0.852736	0.151	0.316	0
Cacna1b	0	0.3565	0.969	0.9	0
Grin1	0	-0.685997	0.851	0.873	0
Olfm1	0	-0.828382	0.353	0.65	0
Garnl3	0	0.732245	0.951	0.754	0
Lmx1b	0	0.785317	0.822	0.246	0
C130021I20Rik	0	0.252682	0.389	0.098	0
Mvb12b	0	0.261936	0.836	0.685	0
C230014O12Rik	0	0.385475	0.495	0.144	0
Pbx3	0	1.68011	0.99	0.621	0
C79798	0	0.654234	0.725	0.215	0
Arhgap15	0	-0.353892	0.084	0.25	0
Gtdc1	0	-0.495067	0.692	0.74	0
Zeb2	0	-1.55542	0.076	0.394	0
Acvr2a	0	-0.464038	0.614	0.685	0
Kcnj3	0	-1.47383	0.408	0.799	0
Nr4a2	0	0.62478	0.799	0.313	0
Tanc1	0	-0.715549	0.202	0.393	0
Kcnh7	0	-2.4296	0.222	0.797	0
Fign	0	-0.701509	0.051	0.26	0
Scn3a	0	0.605886	0.963	0.818	0
Scn1a	0	-0.622051	0.828	0.851	0
B3galt1	0	1.19897	0.993	0.941	0
Stk39	0	0.671213	0.955	0.828	0
Gad1	0	-0.583585	0.127	0.276	0
Tlk1	0	0.35521	0.853	0.679	0
Osbpl6	0	-1.00131	0.661	0.845	0
Zfp385b	0	-1.15841	0.518	0.653	0
Gm13944	0	-0.394653	0.163	0.346	0
Ube2e3	0	-0.397783	0.211	0.453	0
Pde1a	0	-1.17317	0.78	0.762	0
C1qtnf4	0	-0.397051	0.285	0.479	0
Dgkz	0	0.427298	0.776	0.577	0
Lrrc4c	0	-1.22977	0.975	0.947	0
Tcp11l1	0	0.463528	0.855	0.652	0
Mpped2	0	0.743704	0.95	0.716	0
Ano3	0	-0.927674	0.361	0.523	0
Fmn1	0	0.691164	0.898	0.627	0
Gm13963	0	0.259471	0.5	0.258	0
Meis2	0	-1.32158	0.056	0.287	0
Spred1	0	-0.393238	0.529	0.629	0
Rasgrp1	0	-0.690878	0.09	0.416	0
Itpka	0	-0.287787	0.051	0.243	0
Frmd5	0	-1.2798	0.594	0.8	0
Sema6d	0	1.60292	0.991	0.767	0
Slc23a2	0	0.36082	0.868	0.74	0
Plcb4	0	0.969457	0.971	0.673	0
Gm14211	0	0.254397	0.471	0.202	0
Pak7	0	-0.924552	0.648	0.825	0
Macrod2	0	0.377982	0.994	0.97	0
Slc24a3	0	0.57931	0.978	0.875	0
Rin2	0	0.496217	0.721	0.326	0
9030622O22Rik	0	1.1501	0.761	0.225	0
Syndig1	0	-0.696941	0.099	0.416	0
Pxmp4	0	0.285729	0.519	0.27	0
Snhg11	0	0.398974	1	0.992	0
Ptprt	0	-1.58287	0.272	0.55	0
Tox2	0	0.527443	0.827	0.483	0
Prex1	0	-0.281442	0.058	0.229	0
Tshz2	0	-1.2246	0.108	0.397	0
Gm26883	0	-0.767616	0.059	0.308	0
Fam210b	0	0.436077	0.554	0.171	0
Pmepa1	0	0.308994	0.543	0.326	0
Zfp831	0	-0.355088	0.027	0.265	0
Ntsr1	0	0.772306	0.748	0.169	0
Chrna4	0	0.298792	0.496	0.188	0
Klhl13	0	0.843314	0.786	0.36	0
Wdr44	0	0.349166	0.665	0.434	0
Il13ra1	0	0.414707	0.572	0.18	0
Tmem255a	0	0.496889	0.79	0.398	0
Hs6st2	0	-0.842327	0.155	0.545	0
Gpc3	0	-0.341795	0.041	0.16	0
Slitrk4	0	0.268974	0.523	0.275	0
Mamld1	0	-0.40898	0.235	0.466	0
Il1rapl1	0	-1.97686	0.815	0.943	0
Ogt	0	0.257487	0.965	0.904	0
Pbdc1	0	0.824171	0.801	0.447	0
5330434G04Rik	0	0.492966	0.981	0.895	0
Pcdh11x	0	-1.51179	0.254	0.512	0
Drp2	0	0.62365	0.8	0.454	0
Taf7l	0	0.299451	0.428	0.157	0
Il1rapl2	0	0.806745	0.78	0.578	0
Tmem164	0	0.287585	0.782	0.544	0
Ammecr1	0	0.930582	0.923	0.61	0
Trpc5	0	-0.900404	0.245	0.509	0
Rtl4	0	-1.05286	0.37	0.619	0
Htr2c	0	-1.76996	0.258	0.57	0
Iqsec2	0	-0.426567	0.589	0.682	0
Klf8	0	0.285829	0.677	0.452	0
Rps6ka3	0	0.391379	0.9	0.738	0
Bclaf3	0	0.529649	0.756	0.515	0
Cdkl5	0	-0.565538	0.559	0.659	0
Reps2	0	-0.400547	0.736	0.779	0
Glra2	0	-0.555613	0.138	0.339	0
Frmpd4	0	-1.45494	0.776	0.789	0
Arhgap6	0	0.36741	0.793	0.509	0
Zc2hc1a	0	0.252494	0.792	0.638	0
Fndc3b	0	-0.45382	0.459	0.64	0
Tnik	0	-1.6996	0.612	0.921	0
Egfem1	0	-1.24602	0.465	0.655	0
Slc7a14	0	-0.93526	0.138	0.643	0
Mfn1	0	0.279249	0.833	0.671	0
Gm37459	0	0.594174	0.623	0.328	0
Pex5l	0	1.59698	0.94	0.787	0
4930419G24Rik	0	0.926025	0.764	0.474	0
Trpc3	0	-0.432499	0.02	0.217	0
Fat4	0	0.450102	0.652	0.281	0
Maml3	0	0.686869	0.925	0.607	0
Med12l	0	0.310508	0.953	0.87	0
Kcnab1	0	-1.23276	0.356	0.645	0
A330015K06Rik	0	-0.740767	0.161	0.473	0
Gm21949	0	0.787927	0.865	0.412	0
Gm20754	0	-1.56682	0.259	0.561	0
4930509J09Rik	0	-0.769649	0.094	0.387	0
Fstl5	0	-0.838013	0.589	0.665	0
Pdgfc	0	0.36421	0.674	0.368	0
Gucy1b1	0	-0.27772	0.303	0.455	0
Arhgef11	0	0.288749	0.906	0.801	0
Gm3764	0	-0.581271	0.066	0.337	0
Kcnn3	0	1.30359	0.947	0.604	0
Arnt	0	0.333911	0.882	0.752	0
Kcnd3	0	1.66562	0.989	0.841	0
Slc6a17	0	-0.680636	0.38	0.682	0
Fam102b	0	0.289993	0.512	0.25	0
Col11a1	0	0.562436	0.49	0.229	0
Olfm3	0	0.773122	0.876	0.507	0
Palmd	0	0.627429	0.704	0.309	0
Snx7	0	-0.263821	0.208	0.358	0
6530403H02Rik	0	-1.26853	0.148	0.309	0
Arhgap29	0	-0.365641	0.252	0.397	0
Bcar3	0	0.352607	0.415	0.131	0
Ndst3	0	-0.491071	0.48	0.616	0
Col25a1	0	2.00508	0.818	0.502	0
Gm26691	0	0.272927	0.843	0.684	0
Tacr3	0	0.499337	0.333	0.163	0
Ppp3ca	0	-0.433296	0.982	0.964	0
Rap1gds1	0	0.542799	0.941	0.838	0
Bmpr1b	0	0.393694	0.432	0.152	0
Lmo4	0	0.381938	0.759	0.461	0
Adgrl2	0	-0.488879	0.556	0.662	0
Ak5	0	-1.43357	0.324	0.667	0
Negr1	0	-1.05444	0.969	0.953	0
Srsf11	0	-0.257856	0.913	0.899	0
Lrrc7	0	-0.743627	0.98	0.949	0
Wls	0	-0.404312	0.133	0.31	0
Clvs1	0	0.32994	0.938	0.828	0
Runx1t1	0	-0.692012	0.478	0.688	0
Necab1	0	-0.492398	0.357	0.538	0
Pou3f2	0	0.875385	0.708	0.122	0
Klhl32	0	0.594035	0.926	0.71	0
Fut9	0	-0.721965	0.652	0.78	0
Bach2	0	0.639345	0.929	0.737	0
Pnrc1	0	0.271329	0.583	0.37	0
Cnr1	0	-0.575897	0.044	0.357	0
Mob3b	0	1.36105	0.864	0.201	0
Lingo2	0	-0.752242	0.938	0.923	0
Frmpd1	0	0.329162	0.594	0.279	0
Zfp462	0	0.444884	0.934	0.777	0
Frrs1l	0	-0.369481	0.399	0.574	0
Ptpn3	0	-0.788996	0.232	0.449	0
E130308A19Rik	0	0.455914	0.85	0.586	0
Snx30	0	0.299452	0.747	0.543	0
Zfp618	0	0.2906	0.839	0.619	0
Whrn	0	0.452763	0.689	0.347	0
Pappa	0	0.473209	0.472	0.184	0
Astn2	0	-0.7977	0.824	0.862	0
Ptprd	0	-1.91715	0.979	0.971	0
Gm42303	0	-0.30882	0.183	0.355	0
Nfib	0	-1.65954	0.113	0.471	0
Ccdc171	0	0.800631	0.799	0.434	0
Bnc2	0	1.81846	0.96	0.205	0
Sh3gl2	0	-0.518774	0.873	0.846	0
Adamtsl1	0	1.74376	0.901	0.451	0
Acer2	0	0.27052	0.261	0.057	0
Slc24a2	0	-0.980361	0.877	0.851	0
Elavl2	0	1.12763	0.975	0.83	0
Nfia	0	-1.08657	0.098	0.439	0
Kank4	0	0.581596	0.572	0.147	0
Cachd1	0	0.335335	0.754	0.502	0
Dnajc6	0	0.389034	0.966	0.901	0
Sgip1	0	0.39743	0.984	0.948	0
Dab1	0	0.693853	0.991	0.871	0
Osbpl9	0	0.42023	0.965	0.865	0
Elavl4	0	1.02959	0.972	0.807	0
Agbl4	0	0.386061	0.99	0.946	0
Zswim5	0	0.608426	0.861	0.585	0
Gm2164	0	0.33059	0.535	0.174	0
Epha10	0	0.479468	0.886	0.625	0
Grik3	0	0.794501	0.93	0.53	0
Csmd2	0	0.831239	0.977	0.828	0
Ptpru	0	1.01371	0.908	0.432	0
Rsrp1	0	0.286518	0.968	0.915	0
Ephb2	0	0.262338	0.777	0.562	0
Ubr4	0	0.760258	0.861	0.591	0
Igsf21	0	0.361579	0.627	0.328	0
Camta1	0	-0.416953	0.952	0.931	0
Plekhg5	0	-0.303772	0.235	0.392	0
Ajap1	0	0.348009	0.818	0.582	0
Plch2	0	-0.331922	0.028	0.275	0
Cdk14	0	0.47479	0.982	0.916	0
Cacna2d1	0	-0.884024	0.915	0.857	0
Phtf2	0	0.338587	0.818	0.649	0
Reln	0	-0.696888	0.064	0.206	0
Cnpy1	0	0.586796	0.7	0.196	0
9530036O11Rik	0	0.262517	0.568	0.335	0
Otof	0	-0.355595	0.018	0.187	0
Dpysl5	0	0.354706	0.82	0.521	0
Sel1l3	0	-0.476128	0.137	0.36	0
Stim2	0	-0.363338	0.466	0.583	0
Pcdh7	0	-1.04918	0.879	0.921	0
Nwd2	0	1.80536	0.942	0.574	0
0610040J01Rik	0	0.526702	0.516	0.151	0
Atp8a1	0	-0.665099	0.821	0.843	0
Kctd8	0	-1.08354	0.082	0.334	0
Gabrg1	0	-0.573977	0.126	0.297	0
Gabra2	0	-1.38811	0.482	0.732	0
Gabrb1	0	-0.674994	0.974	0.939	0
Slc10a4	0	0.624837	0.678	0.126	0
Fryl	0	0.296764	0.919	0.772	0
C530008M17Rik	0	-0.869071	0.406	0.715	0
Adgrl3	0	-0.68816	0.981	0.961	0
Epha5	0	0.802423	0.979	0.901	0
Slc4a4	0	-0.714643	0.156	0.318	0
Adamts3	0	-0.36333	0.124	0.35	0
Fras1	0	-0.895185	0.267	0.514	0
Mapk10	0	-0.523191	0.958	0.94	0
Sparcl1	0	-0.517505	0.259	0.421	0
Cplx1	0	0.92002	0.845	0.561	0
Galnt9	0	-0.480388	0.278	0.464	0
Sez6l	0	0.713282	0.963	0.826	0
Grk3	0	0.548963	0.842	0.592	0
Cabp1	0	-0.452232	0.21	0.436	0
Srrm4	0	-0.567579	0.673	0.743	0
Nos1	0	-0.320768	0.073	0.238	0
Rasal1	0	-0.385849	0.048	0.314	0
Rph3a	0	0.458585	0.723	0.489	0
Cux2	0	0.493711	0.873	0.571	0
Tmem132b	0	0.385411	0.941	0.793	0
Tmem132d	0	-0.986255	0.179	0.492	0
Rimbp2	0	0.325155	0.925	0.825	0
Mmp17	0	-0.255208	0.077	0.268	0
Caln1	0	1.0456	0.961	0.737	0
Galnt17	0	-1.29167	0.485	0.732	0
Auts2	0	0.343507	0.992	0.954	0
Gtf2ird1	0	0.346457	0.874	0.691	0
Col26a1	0	-0.280387	0.102	0.246	0
Vgf	0	-0.410108	0.161	0.348	0
Uncx	0	0.287572	0.423	0.106	0
Elfn1	0	0.251475	0.45	0.216	0
Mad1l1	0	0.500239	0.893	0.79	0
Sdk1	0	1.02266	0.962	0.668	0
Cyth3	0	0.342966	0.72	0.506	0
Wasf3	0	0.650035	0.88	0.664	0
Dync1i1	0	0.355981	0.972	0.914	0
Ica1	0	0.588363	0.958	0.866	0
Foxp2	0	0.259128	0.9	0.556	0
Cttnbp2	0	-0.880698	0.88	0.879	0
Kcnd2	0	-1.74199	0.829	0.94	0
Ptprz1	0	1.38751	0.97	0.686	0
Cadps2	0	1.50664	0.979	0.658	0
Grm8	0	-1.85988	0.396	0.631	0
Chrm2	0	-0.915961	0.048	0.304	0
Ptn	0	-0.789442	0.185	0.476	0
Hipk2	0	0.583683	0.886	0.72	0
Tmem178b	0	0.723653	0.988	0.958	0
Agk	0	0.97348	0.885	0.597	0
Mpp6	0	0.453395	0.807	0.591	0
Gsdme	0	0.40389	0.841	0.65	0
Osbpl3	0	0.461263	0.745	0.334	0
Snca	0	0.631751	0.937	0.693	0
Grid2	0	-2.25122	0.707	0.919	0
Ndnf	0	0.973999	0.529	0.062	0
Reep1	0	0.39421	0.934	0.83	0
St3gal5	0	-0.520831	0.284	0.543	0
Mat2a	0	0.34049	0.856	0.7	0
Lrrtm4	0	-1.29433	0.876	0.881	0
Add2	0	-0.305641	0.751	0.782	0
Antxr1	0	-0.307367	0.031	0.243	0
Mgll	0	-0.332411	0.168	0.325	0
Plxna1	0	0.375635	0.621	0.328	0
Hdac11	0	0.305762	0.755	0.539	0
Grip2	0	1.36207	0.937	0.378	0
Prickle2	0	0.353225	0.979	0.932	0
Fam19a1	0	-2.20288	0.501	0.66	0
Frmd4b	0	1.74954	0.955	0.559	0
Cntn3	0	-1.84531	0.171	0.679	0
4930587E11Rik	0	-0.412686	0.025	0.302	0
Cntn4	0	0.26914	0.893	0.731	0
Lrrn1	0	-0.279689	0.166	0.33	0
Grm7	0	-2.06624	0.652	0.888	0
Cpne9	0	-0.270273	0.073	0.206	0
Syn2	0	-1.45791	0.519	0.825	0
Timp4	0	-0.415691	0.084	0.385	0
Rasgef1a	0	-0.39332	0.689	0.727	0
Ret	0	1.1584	0.948	0.343	0
Cacna1c	0	-0.508171	0.967	0.938	0
Ntf3	0	0.622841	0.471	0.146	0
Kcna1	0	-0.534798	0.149	0.41	0
Tigar	0	0.491314	0.588	0.213	0
Platr31	0	0.252216	0.351	0.108	0
Ccnd2	0	-0.34934	0.087	0.273	0
Prmt8	0	-0.470435	0.142	0.391	0
Tspan9	0	-0.334687	0.04	0.251	0
Etv6	0	0.386704	0.79	0.539	0
Grin2b	0	-0.44638	0.985	0.95	0
Gucy2c	0	0.54389	0.611	0.128	0
Rerg	0	0.455866	0.703	0.356	0
Lmo3	0	0.804378	0.693	0.442	0
Plekha5	0	0.625272	0.986	0.92	0
Sox5	0	-1.66101	0.12	0.498	0
Sox5os4	0	-0.255521	0.009	0.159	0
Zim1	0	0.306194	0.563	0.267	0
Peg3	0	0.519584	0.983	0.91	0
Usp29	0	0.342292	0.98	0.861	0
Aplp1	0	-0.443643	0.596	0.703	0
Scn1b	0	-0.37113	0.314	0.482	0
Tshz3	0	-0.647597	0.203	0.424	0
Zfp536	0	-0.855575	0.155	0.328	0
Slc17a7	0	-0.792571	0.084	0.398	0
Kcnc1	0	-0.567214	0.407	0.593	0
Ptpn5	0	0.833561	0.892	0.751	0
Nav2	0	0.259517	0.982	0.944	0
Nell1	0	-1.23693	0.405	0.579	0
Ano5	0	-0.339564	0.05	0.258	0
Slc17a6	0	-0.589085	0.116	0.36	0
Gabrg3	0	-0.553511	0.55	0.708	0
Gabra5	0	-0.452755	0.139	0.376	0
Gabrb3	0	-0.433069	0.977	0.947	0
B230209E15Rik	0	-0.395272	0.694	0.726	0
A230057D06Rik	0	0.41369	0.989	0.953	0
Otud7a	0	-0.612412	0.935	0.917	0
Fam189a1	0	0.351692	0.955	0.807	0
Pcsk6	0	0.283115	0.294	0.14	0
Nr2f2	0	-0.458253	0.099	0.339	0
Slco3a1	0	0.423687	0.875	0.762	0
Ntrk3	0	-0.558319	0.883	0.855	0
Mir9-3hg	0	-0.518071	0.233	0.443	0
Homer2	0	0.597932	0.821	0.526	0
Cemip	0	-0.277977	0.061	0.209	0
Arnt2	0	-0.402021	0.632	0.69	0
Grm5	0	-0.939933	0.946	0.911	0
Dlg2	0	-0.970499	0.993	0.984	0
Gm32647	0	-2.37557	0.294	0.511	0
Tenm4	0	-1.56063	0.765	0.867	0
Gm15414	0	-0.286103	0.08	0.312	0
Gab2	0	0.714556	0.94	0.778	0
Galnt18	0	-1.02377	0.27	0.616	0
Mical2	0	-0.546247	0.553	0.636	0
Sox6	0	1.56602	0.802	0.229	0
Plekha7	0	0.615032	0.902	0.609	0
Syt17	0	0.746069	0.866	0.482	0
Crym	0	-0.3014	0.084	0.242	0
Hs3st2	0	-0.357402	0.017	0.175	0
Hs3st4	0	-2.07429	0.191	0.484	0
Gsg1l	0	0.58241	0.642	0.336	0
Plpp4	0	-0.466679	0.085	0.263	0
Gpr26	0	0.483181	0.623	0.238	0
Ebf3	0	0.671397	0.675	0.237	0
Tcerg1l	0	-0.373443	0.105	0.252	0
Th	0	1.17597	0.928	0.269	0
Ppp1r14c	0	-0.481419	0.171	0.447	0
Plekhg1	0	-1.06708	0.067	0.209	0
Syne1	0	-0.326592	0.966	0.942	0
Ust	0	-0.766286	0.091	0.375	0
Stxbp5	0	-0.392944	0.778	0.806	0
Utrn	0	-0.599151	0.156	0.398	0
Aig1	0	-0.542356	0.778	0.847	0
Hivep2	0	-0.911572	0.913	0.916	0
Gm26835	0	-0.660742	0.647	0.753	0
Pde7b	0	-1.22576	0.209	0.502	0
Ptprk	0	-0.921567	0.603	0.716	0
Nkain2	0	0.357391	0.996	0.968	0
E130307A14Rik	0	-0.357159	0.736	0.783	0
Wasf1	0	-0.46847	0.579	0.644	0
Scml4	0	0.452006	0.721	0.385	0
Grik2	0	-1.65638	0.952	0.958	0
Slc35f1	0	1.3933	0.978	0.807	0
Fam184a	0	1.60174	0.975	0.694	0
Man1a	0	-1.10406	0.11	0.421	0
Pkib	0	-0.350009	0.096	0.296	0
Psap	0	-0.379731	0.691	0.754	0
Ccar1	0	0.266184	0.899	0.804	0
Ank3	0	-0.355668	0.989	0.97	0
Slc16a9	0	0.305547	0.392	0.091	0
Pcdh15	0	0.412978	0.956	0.862	0
Celf5	0	-0.344965	0.608	0.673	0
Ankrd24	0	0.269279	0.785	0.563	0
Btbd11	0	0.579369	0.864	0.536	0
Igf1	0	0.938271	0.639	0.14	0
Ano4	0	-1.10029	0.53	0.701	0
Rmst	0	-1.33534	0.303	0.548	0
Socs2	0	0.260864	0.65	0.433	0
Gm10754	0	-0.479494	0.119	0.273	0
Atp2b1	0	-1.20814	0.782	0.835	0
Kitl	0	-0.593575	0.094	0.284	0
Tmtc2	0	0.815379	0.805	0.536	0
Syt1	0	0.622344	0.997	0.968	0
Nav3	0	-2.00359	0.905	0.926	0
Trhde	0	-0.719	0.156	0.376	0
Lgr5	0	-0.327425	0.023	0.149	0
Kcnmb4	0	-0.266526	0.093	0.285	0
Frs2	0	0.330534	0.788	0.633	0
Srgap1	0	0.540902	0.943	0.667	0
Fam19a2	0	-2.01817	0.267	0.676	0
Slc16a7	0	-0.403664	0.516	0.622	0
Efnb2	0	-0.250592	0.164	0.321	0
Fam155a	0	0.753377	0.998	0.974	0
Myo16	0	-0.889609	0.269	0.577	0
Col4a1	0	-0.352368	0.146	0.394	0
Col4a2	0	-0.526026	0.341	0.603	0
Dlgap2	0	-1.16784	0.739	0.825	0
Csmd1	0	0.401975	0.998	0.973	0
Gm26804	0	0.300746	0.98	0.941	0
Ank1	0	0.566786	0.905	0.642	0
Chrnb3	0	1.24702	0.854	0.161	0
Chrna6	0	0.905194	0.76	0.149	0
Unc5d	0	-1.54979	0.391	0.69	0
Nrg1	0	0.424901	0.974	0.911	0
Sgcz	0	0.514065	0.974	0.873	0
Fgf20	0	0.289863	0.411	0.119	0
Micu3	0	0.431041	0.917	0.798	0
Zdhhc2	0	0.689667	0.932	0.754	0
Sorbs2	0	-0.914434	0.94	0.923	0
Gm16351	0	-0.383385	0.22	0.43	0
Sorbs2os	0	-0.648135	0.668	0.747	0
Stox2	0	-0.478803	0.88	0.874	0
Tenm3	0	-1.44794	0.445	0.75	0
4930555F03Rik	0	-0.795541	0.166	0.405	0
Gm45321	0	-0.557369	0.147	0.34	0
Gm45323	0	-0.556959	0.152	0.355	0
Gm45341	0	-0.370684	0.108	0.267	0
Gm2516	0	-0.518841	0.119	0.324	0
C130073E24Rik	0	-1.13822	0.273	0.536	0
Glra3	0	0.38762	0.719	0.45	0
Galntl6	0	1.32873	0.997	0.88	0
Gm26905	0	1.07086	0.962	0.622	0
Nek1	0	0.266668	0.883	0.769	0
Spock3	0	-0.945351	0.671	0.739	0
Tll1	0	1.71073	0.818	0.255	0
March1	0	0.765526	0.972	0.823	0
Csgalnact1	0	-0.748531	0.154	0.414	0
Lzts1	0	-0.344884	0.207	0.356	0
Mast3	0	-0.449304	0.189	0.392	0
Tom1	0	0.277422	0.609	0.356	0
Nr3c2	0	-0.760136	0.789	0.814	0
Arhgap10	0	-0.353965	0.131	0.296	0
Clgn	0	0.591379	0.757	0.364	0
Cacna1a	0	0.772249	0.992	0.947	0
Gm16183	0	0.341334	0.725	0.498	0
Nfix	0	-0.416149	0.1	0.311	0
Tox3	0	0.558428	0.862	0.513	0
Cpne2	0	0.285074	0.459	0.218	0
Cdh8	0	1.36138	0.924	0.769	0
A330008L17Rik	0	1.06741	0.793	0.477	0
Cdh11	0	1.3506	0.916	0.717	0
Zfhx3	0	1.25611	0.992	0.683	0
Lncbate1	0	0.382027	0.498	0.146	0
D030068K23Rik	0	0.353313	0.536	0.312	0
Znrf1	0	0.278662	0.918	0.819	0
Cntnap4	0	1.54601	0.98	0.67	0
Gm45904	0	0.468455	0.637	0.258	0
Cdh13	0	0.374124	0.963	0.731	0
C230057M02Rik	0	-0.257043	0.007	0.216	0
Slc35f3	0	-0.545449	0.15	0.492	0
Nrp1	0	-1.02667	0.06	0.465	0
Abhd6	0	-0.362	0.364	0.546	0
Fhit	0	0.465511	0.949	0.865	0
Synpr	0	-0.831793	0.072	0.295	0
Nek10	0	-0.268643	0.111	0.259	0
Lrrc3b	0	1.44171	0.944	0.548	0
Thrb	0	-0.712675	0.702	0.765	0
Ube2e2	0	-0.313266	0.971	0.948	0
Lrmda	0	1.22301	0.784	0.319	0
Erc2	0	1.61089	0.997	0.963	0
Gm45645	0	0.659891	0.73	0.312	0
Cacna2d3	0	0.72622	0.97	0.845	0
Glud1	0	0.515595	0.868	0.647	0
Nrg3	0	-0.576194	0.993	0.975	0
Nrg3os	0	-0.578452	0.89	0.874	0
Gm20642	0	-0.54864	0.877	0.862	0
Samd4	0	0.404358	0.891	0.613	0
Gch1	0	0.324076	0.432	0.096	0
Peli2	0	-0.313571	0.02	0.214	0
Slc35f4	0	0.441751	0.84	0.617	0
Carmil3	0	0.552435	0.814	0.484	0
Fdft1	0	0.275625	0.635	0.415	0
Fam167a	0	0.517757	0.573	0.102	0
Xkr6	0	0.456751	0.966	0.733	0
Mir124a-1hg	0	0.55202	0.936	0.779	0
Hmbox1	0	0.256166	0.851	0.728	0
Ptk2b	0	-0.787665	0.089	0.404	0
Adra1a	0	-0.424337	0.065	0.247	0
Nefm	0	-0.448455	0.19	0.372	0
Nefl	0	-0.410876	0.296	0.464	0
Rb1	0	0.283358	0.872	0.728	0
Siah3	0	0.407756	0.578	0.266	0
Enox1	0	-1.27378	0.72	0.844	0
Gm6994	0	-0.292448	0.101	0.303	0
Pcdh9	0	-1.49458	0.948	0.963	0
Klhl1	0	1.84515	0.987	0.533	0
Dach1	0	-0.87456	0.102	0.316	0
Klf12	0	-0.820922	0.762	0.851	0
4930517O19Rik	0	-0.397637	0.336	0.523	0
Mycbp2	0	0.332975	0.99	0.968	0
Mbnl2	0	-0.360685	0.911	0.899	0
Clybl	0	0.641231	0.805	0.495	0
AC154683.1	0	0.34276	0.56	0.272	0
Fgf14	0	-0.515047	0.994	0.974	0
Gucy1a2	0	-0.940279	0.764	0.873	0
Trpc6	0	1.12111	0.832	0.427	0
Gm32014	0	0.260283	0.602	0.368	0
Amotl1	0	0.33873	0.764	0.411	0
Olfm2	0	0.380457	0.779	0.494	0
Icam5	0	-0.361835	0.079	0.298	0
Opcml	0	-1.3429	0.954	0.936	0
Gm48091	0	-0.722522	0.373	0.638	0
Arhgap32	0	-0.575004	0.789	0.835	0
Nrgn	0	-0.615715	0.484	0.589	0
Ubash3b	0	0.288829	0.736	0.424	0
CT025619.1	0	0.602209	0.969	0.846	0
Thy1	0	-0.470196	0.354	0.548	0
Fxyd6	0	-0.269077	0.18	0.34	0
Dscaml1	0	-1.05403	0.262	0.503	0
Cadm1	0	-0.713148	0.818	0.917	0
Drd2	0	1.60105	0.902	0.227	0
Ncam1	0	0.457939	0.992	0.956	0
Dixdc1	0	-0.418764	0.329	0.549	0
AI593442	0	-0.252901	0.156	0.323	0
Nptn	0	-0.548485	0.934	0.926	0
Neo1	0	0.358596	0.902	0.799	0
Glce	0	0.332465	0.759	0.531	0
Smad3	0	-0.344734	0.115	0.274	0
Megf11	0	-0.625344	0.093	0.283	0
Usp3	0	-0.311996	0.269	0.419	0
Vps13c	0	-0.357255	0.664	0.744	0
Fam81a	0	-0.400852	0.097	0.359	0
Hcrtr2	0	-0.383262	0.076	0.213	0
Mlip	0	-0.674659	0.104	0.366	0
Myo6	0	0.277432	0.811	0.629	0
Hmgn3	0	0.367362	0.854	0.662	0
Mthfs	0	0.378899	0.749	0.511	0
Rasgrf1	0	-1.38826	0.285	0.738	0
Gm16126	0	-0.268314	0.091	0.32	0
Rasa2	0	0.505546	0.861	0.664	0
Clstn2	0	1.45193	0.97	0.831	0
4921534H16Rik	0	0.64621	0.688	0.373	0
Stag1	0	-0.300216	0.924	0.919	0
Ephb1	0	-0.843258	0.175	0.424	0
Slco2a1	0	0.426714	0.596	0.236	0
Cpne4	0	0.898274	0.962	0.754	0
Cacna2d2	0	0.390306	0.862	0.511	0
Camkv	0	-0.500016	0.417	0.579	0
Bsn	0	0.452888	0.903	0.765	0
Arpp21	0	-2.61057	0.247	0.719	0
Rbms3	0	1.30821	0.988	0.786	0
Gm45881	0	0.915616	0.945	0.676	0
Ctdspl	0	0.604562	0.919	0.69	0
Myrip	0	0.304308	0.86	0.689	0
Snrk	0	0.387989	0.799	0.563	0
Ano10	0	0.389618	0.654	0.38	0
9530059O14Rik	0	1.18994	0.962	0.777	0
Gm35501	0	0.274559	0.39	0.133	0
Osbp2	0	-0.397433	0.436	0.565	0
Camk2b	0	-0.315288	0.802	0.808	0
Ddc	0	1.875	0.989	0.403	0
1700042O10Rik	0	1.78845	0.984	0.347	0
Grb10	0	0.502386	0.957	0.756	0
Cobl	0	-0.50298	0.544	0.676	0
Bcl11a	0	-0.818077	0.285	0.527	0
Kcnip1	0	-0.862777	0.15	0.41	0
Dock2	0	0.319109	0.478	0.157	0
Fam196b	0	0.755527	0.744	0.287	0
Slit3	0	-1.92823	0.369	0.604	0
Gabrg2	0	-0.451765	0.625	0.726	0
Gabra1	0	-0.627939	0.303	0.569	0
Gabrb2	0	-0.907087	0.619	0.788	0
Adam19	0	0.30324	0.619	0.346	0
Sgcd	0	0.889652	0.988	0.869	0
Mapk9	0	0.375485	0.752	0.565	0
Adamts2	0	-0.471175	0.116	0.31	0
Fstl4	0	-1.27354	0.063	0.477	0
Gm12239	0	-0.414785	0.11	0.268	0
Gria1	0	-0.82895	0.957	0.885	0
Rnf112	0	-0.624684	0.431	0.624	0
Shisa6	0	-0.586931	0.5	0.625	0
Gas7	0	-0.65263	0.284	0.501	0
Glp2r	0	-0.828171	0.302	0.537	0
Stx8	0	0.253039	0.801	0.665	0
Ntn1	0	1.19061	0.913	0.321	0
Efnb3	0	-0.356302	0.133	0.345	0
Pitpnm3	0	0.295543	0.715	0.536	0
Rtn4rl1	0	-0.492093	0.047	0.336	0
Slc43a2	0	0.309208	0.754	0.545	0
Nxn	0	0.385796	0.614	0.243	0
Sez6	0	-0.389171	0.184	0.408	0
Spag5	0	0.48556	0.849	0.719	0
Wsb1	0	0.367546	0.917	0.765	0
Asic2	0	-1.68937	0.76	0.861	0
Gm11418	0	-0.371407	0.088	0.321	0
5530401A14Rik	0	-0.260074	0.066	0.256	0
Msi2	0	1.50088	0.986	0.878	0
Car10	0	-2.23839	0.214	0.727	0
Rapgefl1	0	-0.293168	0.318	0.474	0
A830036E02Rik	0	-0.346801	0.015	0.195	0
Hap1	0	-0.452172	0.527	0.65	0
Rprml	0	-0.255755	0.054	0.241	0
Crhr1	0	0.496746	0.628	0.218	0
Prkca	0	1.84979	0.989	0.799	0
Gm11655	0	0.285377	0.407	0.112	0
Cep112	0	-1.0429	0.27	0.525	0
Sdk2	0	-0.491242	0.284	0.447	0
Mgat5b	0	0.321564	0.608	0.406	0
Cyth1	0	0.638579	0.888	0.637	0
Baiap2	0	-0.742366	0.136	0.468	0
Adarb2	0	1.07162	0.991	0.607	0
Chrm3	0	-1.53674	0.287	0.611	0
Ryr2	0	-1.7895	0.474	0.781	0
Lyst	0	0.377806	0.874	0.74	0
Pou6f2	0	-0.820763	0.184	0.351	0
Elmo1	0	-1.07652	0.607	0.72	0
D130043K22Rik	0	0.277503	0.756	0.586	0
E2f3	0	0.422524	0.731	0.485	0
Mboat1	0	0.577658	0.544	0.109	0
Rreb1	0	1.40243	0.888	0.51	0
Phactr1	0	-2.01098	0.805	0.887	0
Gfod1	0	-0.372754	0.518	0.603	0
Rnf182	0	-0.352601	0.077	0.276	0
Spock1	0	-1.58524	0.479	0.752	0
Slc6a3	0	2.13328	0.966	0.234	0
Clptm1l	0	0.259562	0.533	0.272	0
Cast	0	0.457105	0.589	0.22	0
Nr2f1	0	-0.375519	0.068	0.321	0
A830082K12Rik	0	-0.735958	0.208	0.486	0
Adgrv1	0	0.267987	0.389	0.234	0
Mef2c	0	-0.862237	0.653	0.675	0
Edil3	0	-2.42361	0.148	0.727	0
Vcan	0	0.26937	0.285	0.116	0
Ssbp2	0	0.318927	0.951	0.84	0
Rasgrf2	0	0.618431	0.925	0.654	0
Msh3	0	0.350194	0.776	0.539	0
Ankrd34b	0	0.268588	0.453	0.18	0
Pde8b	0	-0.973383	0.329	0.731	0
Sv2c	0	1.82686	0.902	0.337	0
Hmgcr	0	0.294763	0.699	0.505	0
Adamts6	0	0.942882	0.79	0.363	0
Pde4d	0	0.653891	0.994	0.958	0
Rab3c	0	0.762695	0.98	0.909	0
Hcn1	0	-1.67573	0.32	0.638	0
4933413L06Rik	0	-0.371824	0.053	0.29	0
Klhl29	0	0.368942	0.928	0.841	0
AC159282.1	0	0.265008	0.489	0.265	0
Kcns3	0	1.19865	0.724	0.139	0
Vsnl1	0	1.03327	0.982	0.887	0
Greb1	0	0.467769	0.535	0.085	0
Kidins220	0	0.270687	0.963	0.914	0
Pxdn	0	-0.315601	0.2	0.386	0
Sntg2	0	-0.630323	0.097	0.299	0
Hdac9	0	1.099	0.987	0.903	0
Dgkb	0	-1.00565	0.952	0.925	0
Immp2l	0	0.91649	0.967	0.85	0
Lrrn3	0	0.339439	0.705	0.478	0
Nrcam	0	-0.409804	0.952	0.915	0
Stxbp6	0	-0.935121	0.072	0.355	0
B230217J21Rik	0	-0.308393	0.055	0.193	0
Nova1	0	-0.773178	0.424	0.579	0
Prkd1	0	0.378731	0.586	0.235	0
Heatr5a	0	0.390324	0.708	0.4	0
Gm35188	0	0.53864	0.914	0.763	0
Arhgap5	0	0.522465	0.932	0.802	0
Npas3	0	-1.57452	0.495	0.684	0
Ttc6	0	0.800385	0.858	0.301	0
Mdga2	0	-0.725374	0.983	0.971	0
Nin	0	-0.638817	0.604	0.722	0
Frmd6	0	-0.372606	0.079	0.309	0
Kcnh5	0	-0.658411	0.139	0.414	0
Galnt16	0	-0.5701	0.341	0.594	0
Slc8a3	0	0.295918	0.903	0.72	0
Rgs6	0	1.50469	0.938	0.61	0
Nrxn3	0	1.14547	0.999	0.958	0
Kcnk10	0	-0.472585	0.378	0.576	0
3300002A11Rik	0	0.913886	0.722	0.313	0
Calm1	0	-0.610485	0.891	0.906	0
Ttc7b	0	-0.412352	0.796	0.809	0
Slc24a4	0	-0.321029	0.076	0.24	0
Prima1	0	0.768776	0.694	0.123	0
Clmn	0	-0.626705	0.212	0.435	0
Bcl11b	0	-0.451785	0.183	0.348	0
Cyp46a1	0	-0.256263	0.255	0.413	0
Eml1	0	-0.460766	0.388	0.539	0
Wdr25	0	0.290132	0.474	0.255	0
Begain	0	0.647671	0.832	0.508	0
Dlk1	0	0.969457	0.871	0.313	0
Meg3	0	0.765841	1	0.994	0
Rtl1	0	0.336819	0.673	0.43	0
B830012L14Rik	0	0.308031	0.662	0.44	0
Mirg	0	0.871054	0.971	0.854	0
Rapgef5	0	0.360298	0.926	0.696	0
Itgb8	0	0.396989	0.577	0.226	0
Tmem196	0	0.392925	0.742	0.416	0
Ghr	0	0.260468	0.816	0.574	0
Plcxd3	0	0.440203	0.923	0.685	0
Prlr	0	-0.61197	0.071	0.204	0
Cdh12	0	-1.63815	0.278	0.577	0
Cdh18	0	0.395991	0.984	0.879	0
Retreg1	0	0.302357	0.797	0.583	0
March11	0	0.368007	0.739	0.52	0
Fbxl7	0	0.982723	0.801	0.487	0
Ctnnd2	0	0.51732	0.993	0.968	0
Ankrd33b	0	-0.396712	0.025	0.232	0
Gm32618	0	0.29075	0.569	0.32	0
Sdc2	0	0.765991	0.888	0.552	0
Cpq	0	0.993034	0.82	0.483	0
Ncald	0	-0.485478	0.794	0.831	0
Rims2	0	-0.334539	0.981	0.952	0
Zfpm2	0	-1.51984	0.149	0.399	0
Oxr1	0	-2.40948	0.513	0.799	0
Gm26854	0	-0.257911	0.016	0.238	0
Csmd3	0	-0.33414	0.988	0.957	0
Ext1	0	-0.617039	0.866	0.869	0
Adcy8	0	-1.06915	0.301	0.601	0
Gm21798	0	-0.557424	0.133	0.406	0
St3gal1	0	0.26257	0.403	0.17	0
Khdrbs3	0	-1.26091	0.602	0.759	0
Fam135b	0	0.649768	0.968	0.856	0
Adgrb1	0	-0.613184	0.534	0.675	0
Nptxr	0	-0.39739	0.204	0.393	0
Cacna1i	0	-0.354938	0.027	0.303	0
Tcf20	0	0.278919	0.968	0.914	0
Mpped1	0	-0.428547	0.168	0.328	0
Cntn1	0	0.414408	0.986	0.952	0
Tmem117	0	0.856644	0.94	0.774	0
Ano6	0	0.38552	0.894	0.746	0
Dip2b	0	0.292456	0.946	0.88	0
Scn8a	0	-0.467847	0.869	0.855	0
AC124490.1	0	-0.332019	0.018	0.198	0
Rbfox1	0	-3.19952	0.759	0.86	0
2900011O08Rik	0	0.501838	0.943	0.82	0
Aifm3	0	-0.502187	0.2	0.492	0
Etv5	0	1.10632	0.863	0.397	0
Dgkg	0	-1.18389	0.208	0.578	0
Lpp	0	0.311513	0.719	0.574	0
Il1rap	0	0.86712	0.92	0.595	0
Fgf12	0	-0.570998	0.988	0.963	0
Acap2	0	-0.453727	0.698	0.744	0
Osbpl11	0	0.463641	0.664	0.408	0
Kalrn	0	-0.855757	0.965	0.932	0
Stxbp5l	0	-1.06814	0.818	0.88	0
Fstl1	0	-0.266341	0.086	0.289	0
Igsf11	0	-0.363347	0.042	0.231	0
Gap43	0	0.42222	0.971	0.861	0
Phldb2	0	0.940187	0.724	0.155	0
Plcxd2	0	0.604188	0.706	0.271	0
Alcam	0	-0.712655	0.641	0.708	0
Epha6	0	0.441732	0.985	0.859	0
Htr1f	0	-0.742184	0.446	0.541	0
Cadm2	0	1.16235	0.999	0.979	0
4933411O13Rik	0	0.27771	0.473	0.246	0
Robo2	0	1.18217	0.99	0.835	0
AC129186.1	0	-1.36842	0.017	0.304	0
App	0	0.637707	0.99	0.961	0
Cyyr1	0	0.461993	0.361	0.074	0
Grik1	0	0.415563	0.715	0.433	0
Son	0	-0.320263	0.932	0.919	0
Dopey2	0	-0.324873	0.479	0.611	0
Ttc3	0	-0.281378	0.988	0.972	0
AC165271.1	0	0.706627	0.665	0.224	0
Kcnj6	0	2.12135	0.981	0.799	0
Dscam	0	0.56834	0.991	0.917	0
Zdhhc14	0	-0.714004	0.698	0.757	0
Gm26848	0	-0.432985	0.993	0.968	0
Gm1604a	0	-0.463458	0.271	0.463	0
Fndc1	0	-0.251688	0.068	0.214	0
Qk	0	0.293045	0.846	0.663	0
Agpat4	0	0.788906	0.896	0.585	0
Tcte2	0	0.264522	0.864	0.69	0
Gm26873	0	0.620847	0.534	0.145	0
Lix1	0	1.66036	0.777	0.321	0
Lnpep	0	0.38379	0.87	0.752	0
Rgs11	0	0.397035	0.737	0.457	0
Gm17276	0	0.251138	0.767	0.547	0
Gm26917	0	0.358274	0.892	0.752	0
Rcan2	0	1.18486	0.95	0.692	0
Lrfn2	0	-0.634328	0.404	0.63	0
Rftn1	0	-0.377559	0.075	0.286	0
Satb1	0	1.04387	0.833	0.411	0
St6gal2	0	0.657965	0.775	0.466	0
Ptprs	0	0.2951	0.973	0.914	0
Cntnap5c	0	-1.14693	0.304	0.599	0
Tmem232	0	0.453227	0.43	0.172	0
Ptprm	0	-1.09825	0.331	0.474	0
L3mbtl4	0	0.512737	0.495	0.234	0
Epb41l3	0	-1.16671	0.394	0.791	0
Dlgap1	0	-0.804272	0.989	0.965	0
5031415H12Rik	0	-0.289026	0.126	0.316	0
Lbh	0	0.498029	0.605	0.167	0
Lclat1	0	0.323278	0.791	0.615	0
Galnt14	0	-0.553436	0.122	0.307	0
Crim1	0	-0.658656	0.475	0.652	0
Vit	0	0.325357	0.445	0.127	0
Cdc42ep3	0	0.404362	0.645	0.305	0
Plekhh2	0	0.356702	0.71	0.422	0
Prkce	0	-0.38738	0.954	0.918	0
Calm2	0	-0.587343	0.887	0.904	0
Nrxn1	0	-0.394898	0.996	0.984	0
Mpp7	0	0.392962	0.745	0.411	0
Greb1l	0	-0.575887	0.475	0.625	0
Lama3	0	0.584234	0.532	0.143	0
Zfp521	0	0.555629	0.726	0.302	0
Cdh2	0	-0.581649	0.825	0.881	0
AW554918	0	0.25953	0.876	0.754	0
Celf4	0	0.30852	0.99	0.937	0
Rit2	0	0.408987	0.977	0.905	0
Camk4	0	-0.605602	0.723	0.748	0
Epb41l4a	0	0.547535	0.795	0.348	0
Ctnna1	0	0.741595	0.802	0.426	0
Sil1	0	0.28639	0.754	0.57	0
Diaph1	0	0.266811	0.696	0.501	0
Nr3c1	0	-0.527529	0.31	0.513	0
2900055J20Rik	0	-0.68614	0.036	0.405	0
Kctd16	0	-2.48036	0.196	0.666	0
Mcc	0	0.938235	0.935	0.53	0
Sema6a	0	-0.73315	0.254	0.461	0
Prr16	0	1.2154	0.981	0.688	0
Sncaip	0	1.27635	0.921	0.457	0
Snx24	0	0.549904	0.789	0.585	0
Chsy3	0	-1.38081	0.191	0.602	0
Synpo	0	-0.32024	0.104	0.296	0
Camk2a	0	-1.3508	0.594	0.797	0
Slc6a7	0	-0.418366	0.221	0.51	0
Htr4	0	-0.690119	0.054	0.368	0
Nedd4l	0	0.280267	0.956	0.889	0
Ptpn2	0	0.316811	0.719	0.536	0
Ldlrad4	0	0.706228	0.92	0.826	0
Tcf4	0	-1.24871	0.808	0.803	0
Dcc	0	1.02477	0.996	0.902	0
Mapk4	0	-0.69503	0.096	0.425	0
St8sia5	0	-0.381183	0.123	0.364	0
Mbp	0	-0.686366	0.304	0.48	0
Neto1	0	-1.32169	0.05	0.493	0
Gnaq	0	0.594032	0.976	0.93	0
Pcsk5	0	-0.74998	0.102	0.356	0
Rorb	0	-1.14177	0.08	0.282	0
Anxa1	0	0.375199	0.157	0.03	0
Aldh1a1	0	0.93565	0.459	0.17	0
Gda	0	-0.73073	0.094	0.382	0
Ptar1	0	0.461939	0.629	0.271	0
Apba1	0	1.59415	0.991	0.917	0
Smarca2	0	-0.459668	0.66	0.723	0
Rfx3	0	-0.988486	0.717	0.791	0
Glis3	0	-0.477494	0.024	0.156	0
Slc1a1	0	-0.516735	0.436	0.623	0
4430402I18Rik	0	-0.390511	0.384	0.553	0
Stambpl1	0	-0.390743	0.126	0.414	0
Htr7	0	-0.429167	0.096	0.315	0
Plce1	0	0.31299	0.45	0.191	0
Sorbs1	0	-0.386817	0.885	0.875	0
Crtac1	0	-0.450077	0.174	0.368	0
Sema4g	0	0.267864	0.622	0.363	0
Kcnip2	0	-0.291219	0.087	0.273	0
Gbf1	0	0.886775	0.969	0.871	0
Sh3pxd2a	0	-0.276156	0.269	0.415	0
Sorcs3	0	-1.77476	0.22	0.728	0
Sorcs1	0	-1.80236	0.311	0.659	0
Atrnl1	0	-0.614599	0.878	0.843	0
Gfra1	0	0.832019	0.591	0.375	0
Slc18a2	0	1.66004	0.989	0.48	0
Fam204a	0	0.458487	0.614	0.342	0
Prox1	0	-0.261218	0.019	0.124	0
Dock10	0	-0.732764	0.354	0.487	0
Baz2b	0	-0.356979	0.848	0.856	0
St8sia4	0	-0.31117	0.134	0.273	0
Gpm6a	0	-0.327412	0.939	0.913	0
Rock2	0	-0.347588	0.877	0.861	0
Mdga1	0	-0.267385	0.086	0.215	0
Tcf7l2	0	-0.927223	0.071	0.194	0
Tmem132a	0	-0.271594	0.288	0.433	0
Pard3	0	-0.48355	0.605	0.659	0
Fam13a	0	-0.36148	0.361	0.486	0
Prkag2	0	-0.458739	0.733	0.736	0
Herc3	0	-0.303633	0.654	0.707	0
Mgat4c	0	-0.913762	0.86	0.828	0
Coro2b	0	-0.296247	0.444	0.555	0
Ahi1	0	-0.284316	0.988	0.962	0
Col23a1	0	-0.356921	0.082	0.207	0
Hspa12a	0	-0.30325	0.403	0.509	0
Rapgef2	0	-0.35601	0.848	0.837	0
Tnrc6c	0	-0.253578	0.954	0.933	0
Plppr5	0	-0.356124	0.532	0.619	0
Adam11	0	-0.250564	0.284	0.428	0
Unc13c	0	-0.806972	0.345	0.467	0
Clstn1	0	-0.322949	0.738	0.761	0
Matn2	0	-0.274213	0.094	0.22	0
Cntnap5b	0	-0.724352	0.63	0.704	0
Nsun7	0	-0.275326	0.376	0.503	0
Ppargc1a	0	-0.413305	0.419	0.521	0
Sidt1	0	-0.459621	0.518	0.575	0
Pkp2	0	-0.286346	0.156	0.286	0
Tcf12	0	-0.410293	0.863	0.868	0
Ptchd4	0	-0.56831	0.347	0.472	0
5730522E02Rik	0	-0.808758	0.763	0.736	0
Ctnna3	0	-0.47843	0.834	0.849	0
Hivep3	0	-0.337893	0.905	0.869	0
Tmtc1	0	-0.401962	0.619	0.678	0
Nebl	0	-0.522809	0.836	0.795	0
Plxnc1	0	-0.300723	0.407	0.543	0
Synpo2	0	-1.00882	0.078	0.196	0
Sema3a	0	-0.282705	0.067	0.182	0
Tspan5	0	-0.535438	0.741	0.739	0
Chst8	0	-0.276136	0.24	0.383	0
Ppm1e	0	-0.377148	0.916	0.88	0
Chgb	0	-0.312433	0.382	0.504	0
Arhgef26	0	-0.250752	0.045	0.151	0
Fam171b	0	-0.336631	0.638	0.694	0
Tiam2	0	-0.34139	0.202	0.324	0
Lynx1	0	-0.256062	0.255	0.386	0
Setbp1	0	-0.3284	0.914	0.882	0
Ecel1	0	-0.278031	0.019	0.111	0
Limd1	0	0.418745	0.301	0.178	0
Tmsb4x	0	-0.416757	0.461	0.567	0
Rhbdl3	0	-0.272573	0.172	0.297	0
Syt2	0	-0.442456	0.149	0.268	0
Zmym1	0	-0.264097	0.394	0.518	0
Smpd4	0	-0.264325	0.418	0.515	0
Fth1	0	-0.504435	0.806	0.824	0
Aff2	0	-0.514708	0.701	0.739	0
Ttr	0	-0.611585	0.273	0.407	0
Dlx6os1	0	-0.324198	0.016	0.103	0
Rgs7bp	0	-0.483869	0.84	0.806	0
Prelid3a	0	-0.266712	0.541	0.625	0
Tmem163	0	-0.431822	0.369	0.495	0
Slc16a2	0	-0.354375	0.654	0.702	0
Nbas	0	-0.294632	0.656	0.716	0
Tead1	0	-0.458152	0.335	0.449	0
Pip4k2a	0	-0.356993	0.389	0.497	0
Zfp804a	0	-1.0252	0.7	0.694	0
Homer1	0	-0.485086	0.627	0.661	0
Prkcb	0	-0.370834	0.929	0.903	0
Gpm6b	0	-0.727566	0.721	0.695	0
Ppib	0	-0.293384	0.567	0.631	0
Dtna	0	-0.35948	0.852	0.843	0
Stmn4	0	-0.297655	0.305	0.437	0
Hspa5	0	-0.274243	0.313	0.439	0
Pcp4	0	-0.498362	0.381	0.491	0
Kcnn2	0	-0.477187	0.786	0.773	0
Rnf150	0	-0.380327	0.757	0.74	0
Prkg2	0	-0.297123	0.223	0.347	0
Srsf7	0	-0.257956	0.764	0.79	0
Lef1	0	-0.836666	0.03	0.118	0
Phf24	0	-0.322618	0.726	0.712	0
Tspan7	0	-0.334318	0.836	0.842	0
Elmod1	0	-0.3151	0.765	0.772	0
Pds5b	0	-0.294701	0.669	0.725	0
Oprm1	0	-0.390218	0.311	0.419	0
Mb21d2	0	-0.355153	0.247	0.365	0
Fars2	0	-0.276476	0.781	0.79	0
Ccbe1	0	-0.325254	0.095	0.205	0
Fam126b	0	-0.277591	0.696	0.719	0
Mkl2	0	-0.291322	0.872	0.841	0
B230334C09Rik	0	-0.396044	0.576	0.612	0
Tmem135	0	-0.251285	0.787	0.798	0
Nxph1	0	-1.80051	0.402	0.472	0
Srcin1	0	-0.285149	0.767	0.773	0
Atp10a	0	-0.289791	0.108	0.213	0
Spock2	0	-0.274182	0.806	0.81	0
Sez6l2	0	-0.277233	0.568	0.634	0
Slc32a1	0	-0.259594	0.083	0.185	0
Snrpn	0	-0.414073	0.647	0.669	0
A330102I10Rik	0	-0.436759	0.422	0.502	0
Zfyve28	0	-0.299352	0.531	0.584	0
March3	0	-0.298731	0.267	0.383	0
Gm15738	0	-0.296682	0.736	0.732	0
Sema3e	0	-0.474589	0.153	0.261	0
Aff3	0	-0.355935	0.882	0.849	0
Gas2	0	-0.283475	0.451	0.54	0
Rspo2	0	-0.304915	0.072	0.169	0
Gpr137c	0	-0.345191	0.613	0.67	0
Npas2	0	-0.441342	0.327	0.419	0
Rab3b	0	-0.31983	0.124	0.23	0
Plpp3	0	-0.276876	0.059	0.154	0
1700024B18Rik	0	-0.252104	0.443	0.543	0
Rps6ka2	0	-0.299419	0.529	0.594	0
Dnah9	0	-0.295156	0.321	0.437	0
Klhl3	0	-0.278309	0.621	0.65	0
4930445B16Rik	0	-0.353238	0.281	0.379	0
2010111I01Rik	0	-0.263845	0.893	0.869	0
Cntnap2	0	-0.460318	0.994	0.964	0
Ywhaz	0	-0.271644	0.82	0.803	0
Trim9	0	-0.30719	0.916	0.877	0
Nnat	0	-0.740461	0.663	0.697	0
Dynll1	0	-0.330356	0.53	0.605	0
Cck	0	-0.449289	0.421	0.509	0
Phactr2	0	-0.379345	0.442	0.529	0
Gnas	0	-0.42814	0.965	0.949	0
2610035D17Rik	0	-0.332956	0.474	0.549	0
Dlc1	0	-0.474969	0.688	0.692	0
Mcu	0	-0.305971	0.758	0.758	0
Shank2	0	-0.297138	0.852	0.809	0
Ly6h	0	-0.358246	0.912	0.857	0
Gm13481	0	-0.260011	0.098	0.196	0
Sntb2	0	-0.33785	0.43	0.502	0
Cx3cl1	0	-0.253133	0.423	0.508	0
Thra	0	-0.292373	0.778	0.781	0
Kcnc2	0	-0.920951	0.823	0.789	0
Rnf169	0	-0.255258	0.614	0.658	0
Atp2a2	0	-0.371574	0.79	0.785	0
Fbxw7	0	-0.250763	0.713	0.717	0
Tmem178	0	-0.325067	0.232	0.326	0
Gm13629	0	-0.529102	0.503	0.523	0
Ndrg4	0	-0.293757	0.911	0.882	0
Actb	0	-0.401333	0.853	0.86	0
Gm28153	0	0.289329	0.569	0.453	0
Grm3	0	-0.648744	0.472	0.529	0
Adarb1	0	-0.515641	0.702	0.711	0
Spon1	0	-0.400602	0.373	0.455	0
Ptprj	0	-0.442062	0.839	0.803	0
Sort1	0	-0.277264	0.701	0.706	0
Phactr3	0	-0.258485	0.799	0.784	0
Prkcd	0	-0.534361	0.071	0.152	0
Lrrtm3	0	-0.331255	0.781	0.811	0
Ahcyl2	0	-0.256473	0.904	0.875	0
Slc9a9	0	-0.449619	0.703	0.707	0
Mei4	0	-0.294907	0.263	0.348	0
Map7	0	-0.345277	0.756	0.754	0
Pde4b	0	-0.5786	0.906	0.863	0
Otx2os1	0	-0.353479	0.059	0.132	0
Lingo1	0	-0.257292	0.681	0.682	0
Mtus2	0	-0.273097	0.701	0.714	0
Cpe	0	-0.326038	0.916	0.891	0
Pla2g6	0	0.263812	0.226	0.141	0
Adcy2	0	-0.489778	0.571	0.587	0
Ntng2	0	-0.25832	0.154	0.238	0
9530026P05Rik	0	-0.383941	0.257	0.363	0
Ubb	0	-0.367481	0.932	0.922	0
Zfp804b	0	-0.991605	0.398	0.483	0
Peak1	0	-0.29722	0.868	0.841	0
Faim2	0	-0.253506	0.566	0.622	0
Xpr1	0	-0.273027	0.739	0.752	0
Inpp5f	0	-0.256582	0.494	0.557	0
Samd5	0	-0.458384	0.569	0.584	0
Dock1	0	-0.301645	0.195	0.289	0
Gm42418	0	-0.324023	1	0.999	0
Bcan	0	-0.298542	0.13	0.208	0
Asap1	0	-0.320213	0.819	0.809	0
Creb5	0	-0.312196	0.05	0.119	0
Gria4	0	-0.303632	0.986	0.954	0
Igf1r	0	-0.319702	0.787	0.76	0
Ksr1	0	-0.253038	0.346	0.418	0
Baiap3	0	-0.41888	0.267	0.342	0
Pcsk1n	0	-0.388527	0.901	0.897	0
Rnf121	0	-0.265588	0.659	0.676	0
Nckap5	0	-0.412232	0.411	0.487	0
Pik3r1	0	-0.316908	0.4	0.469	0
Rps6ka5	0	-0.280638	0.444	0.505	0
Chst9	0	-0.376453	0.131	0.211	0
Npsr1	0	-0.48643	0.084	0.154	0
Nsg1	0	-0.255577	0.499	0.561	0
Rbfox3	0	-0.253615	0.895	0.837	0
Apba2	0	-0.292064	0.804	0.774	0
Sgk1	0	-0.288839	0.562	0.588	0
Sema5a	0	-0.50742	0.336	0.39	0
Tac1	0	-0.286915	0.052	0.115	0
Angpt1	0	-0.300007	0.099	0.173	0
Atp1a2	0	-0.313276	0.063	0.13	0
Kirrel3	0	-0.704806	0.871	0.808	0
Klhl2	0	-0.357116	0.63	0.638	0
Dlg1	0	-0.271729	0.853	0.803	0
Diaph2	0	-0.275963	0.827	0.809	0
Prkcg	0	-0.341577	0.716	0.66	0
Ncdn	0	-0.258888	0.539	0.588	0
Tmeff2	0	-0.311404	0.902	0.891	0
Xirp2	0	-0.376268	0.111	0.056	0
Sept7	0	-0.295903	0.788	0.778	0
Tiam1	0	-0.272713	0.788	0.755	0
Wdr17	0	-0.410677	0.758	0.726	0
Itm2b	0	-0.282131	0.766	0.772	0
Sept11	0	-0.250294	0.635	0.637	0
Phlpp1	0	-0.37597	0.815	0.8	0
Pdzd2	0	-0.335741	0.34	0.409	0
Gm2163	0	-0.265783	0.752	0.723	0
Grin3a	0	-0.390257	0.512	0.562	0
Flrt2	0	-0.299425	0.593	0.619	0
Gm16168	0	-0.3055	0.199	0.272	0
Tle4	0	-0.401574	0.556	0.578	0
Zbtb16	0	-0.298423	0.28	0.338	0
Adgra1	0	-0.251088	0.553	0.579	0
Sst	0	-0.314002	0.079	0.141	0
Cap2	0	-0.285108	0.765	0.723	0
Ntng1	0	-0.334951	0.81	0.653	0
Ppp1r9a	0	-0.263971	0.929	0.898	0
Ndufa4	0	-0.307138	0.634	0.664	0
Pitpnc1	0	-0.346551	0.785	0.601	0
Itm2c	0	-0.261992	0.576	0.61	0
Itgbl1	0	-0.268619	0.345	0.407	0
Nkain3	0	-0.722852	0.8	0.713	0
Gm28376	0	-0.346023	0.322	0.368	0
Pacrg	0	-0.322501	0.668	0.67	0
Mt3	0	-0.276192	0.611	0.64	0
Sash1	0	-0.343709	0.407	0.443	0
Aldoa	0	-0.282528	0.82	0.804	0
Dpyd	0	-0.549926	0.816	0.742	0
Bsg	0	-0.331651	0.629	0.65	0
Gulp1	0	-0.32113	0.225	0.277	0
Apoe	0	-0.453885	0.249	0.311	0
Kcnh8	0	-0.250013	0.076	0.123	0
Nell2	0	-0.451756	0.893	0.784	0
Map3k5	0	-0.255432	0.588	0.571	0
Efr3a	0	-0.296689	0.676	0.652	0
Inpp4b	0	-0.490103	0.838	0.797	0
Gm30382	0	-0.285686	0.435	0.487	0
2010300C02Rik	0	-0.368528	0.44	0.436	0
Slit1	0	-0.284941	0.565	0.55	0
Grm1	0	-0.636551	0.747	0.706	0
mt-Co1	0	-0.410479	0.594	0.616	0
Eda	0	-0.341214	0.451	0.473	0
Cdh9	0	-0.581951	0.52	0.488	0
Cd81	0	-0.260346	0.511	0.546	0
Cox8a	0	-0.251194	0.76	0.756	0
Ndst4	0	-0.515501	0.321	0.353	0
Tox	0	-0.425798	0.455	0.492	0
St18	0	-0.693863	0.062	0.101	0
Sh3d19	0	-0.302658	0.758	0.626	0
Ptgds	0	-0.640233	0.264	0.315	0
Sh3rf3	0	-0.275619	0.734	0.672	0
Etv1	0	-0.372792	0.316	0.348	0
Cacng3	0	-0.281286	0.603	0.571	0
Tmem108	0	-0.252878	0.921	0.843	0
mt-Co3	0	-0.383059	0.552	0.572	0
Trpm3	0	-0.624117	0.94	0.739	0
Pde1c	0	-0.386275	0.275	0.309	0
Cartpt	0	-0.364982	0.102	0.141	0
Grip1	0	-0.499346	0.962	0.926	0
Mctp1	0	-0.357599	0.866	0.776	0
Ldb2	0	-0.476681	0.618	0.575	0
Rnf220	0	-0.948467	0.553	0.539	0
mt-Atp6	0	-0.333609	0.368	0.401	0
Zfp423	0	-0.262056	0.526	0.509	0
Ckb	0	-0.256255	0.848	0.814	0
Plp1	0	-0.874601	0.284	0.316	0
Fndc3a	0	-0.367292	0.806	0.763	0
Pdzrn3	0	-0.511053	0.348	0.273	0
Tmem132c	0	-0.327371	0.222	0.24	0
Lhfpl3	0	-0.574074	0.916	0.798	0
Ncam2	0	-0.479169	0.958	0.868	0
mt-Co2	0	-0.29108	0.425	0.445	0
mt-Cytb	0	-0.293519	0.441	0.457	0
Kcnip4	0	-0.264656	0.995	0.966	0
Cst3	0	-0.383478	0.654	0.647	0
Ntm	0	-0.255834	0.854	0.857	0
Cdh6	0	-0.32823	0.281	0.284	0
Gpc5	0	-1.34622	0.516	0.483	0
Thsd7a	0	-0.337745	0.753	0.678	0
Gabra4	0	-0.262986	0.669	0.561	0
Slc1a2	0	-0.286087	0.775	0.674	0
Kcnmb2	0	-0.302362	0.38	0.332	0
Xylt1	0	-0.29609	0.772	0.676	0
Mast4	0	-0.356738	0.909	0.835	0
Trps1	0	-0.465166	0.853	0.726	0
Efna5	0	-0.339727	0.794	0.674	1
Cntnap5a	0	-0.307332	0.94	0.834	1
Sv2b	0	-0.342085	0.71	0.576	1
Zmat4	0	-0.624542	0.623	0.538	1
Scg2	0	-0.304374	0.713	0.609	1
Enpp2	1	-0.367378	0.4	0.364	1

## Sheet: c_2
Column1	p_val	avg_log2FC	pct.1	pct.2	p_val_adj
Xkr4	0	0.546281	0.993	0.964	0
Gm1992	0	0.376231	0.871	0.665	0
Oprk1	0	-0.506511	0.088	0.354	0
3110035E14Rik	0	0.28223	0.469	0.11	0
Sgk3	0	0.381145	0.615	0.229	0
Cpa6	0	0.344097	0.343	0.158	0
A830018L16Rik	0	1.38501	0.974	0.551	0
Kcnb2	0	0.299583	0.981	0.899	0
Gm28376	0	0.785361	0.821	0.27	0
Jph1	0	0.588074	0.727	0.223	0
Crispld1	0	0.273932	0.313	0.107	0
Kcnq5	0	1.09899	0.981	0.632	0
Adgrb3	0	0.295091	0.996	0.974	0
Bend6	0	-0.479121	0.778	0.78	0
Dst	0	-0.711273	0.976	0.958	0
2010300C02Rik	0	1.20387	0.927	0.343	0
Tsga10	0	0.350137	0.771	0.461	0
Aff3	0	0.496625	0.962	0.836	0
Npas2	0	0.623673	0.787	0.326	0
Creg2	0	0.33774	0.583	0.214	0
Fhl2	0	0.361192	0.477	0.115	0
Dnah7b	0	-0.345841	0.179	0.353	0
Slc39a10	0	0.388756	0.763	0.429	0
Tmeff2	0	0.359325	0.984	0.876	0
Mfsd6	0	-0.529977	0.504	0.641	0
Hibch	0	-0.369758	0.28	0.474	0
Ankrd44	0	-0.507515	0.283	0.506	0
Satb2	0	0.48638	0.471	0.1	0
Spats2l	0	-0.64538	0.575	0.644	0
Nbeal1	0	-0.566581	0.809	0.838	0
Abi2	0	0.301503	0.958	0.816	0
Adam23	0	-0.4361	0.908	0.864	0
Erbb4	0	-3.40948	0.428	0.769	0
Vwc2l	0	-1.59746	0.332	0.662	0
Resp18	0	-0.670827	0.472	0.653	0
Speg	0	0.250928	0.787	0.506	0
Sgpp2	0	-0.435918	0.224	0.403	0
Scg2	0	-1.1561	0.304	0.694	0
Serpine2	0	-0.649109	0.312	0.439	0
Hjurp	0	-0.341429	0.378	0.509	0
Agap1	0	-0.567881	0.91	0.902	0
Lrrfip1	0	0.349049	0.945	0.756	0
Ramp1	0	0.466625	0.578	0.082	0
Kif1a	0	-0.307179	0.924	0.876	0
Cdh20	0	-1.07672	0.213	0.496	0
Rnf152	0	-0.636527	0.071	0.429	0
Cntnap5a	0	0.690123	0.959	0.836	0
Epb41l5	0	-0.423839	0.16	0.415	0
En1	0	-0.730251	0.03	0.386	0
Dpp10	0	0.526378	0.966	0.89	0
Gm28928	0	1.91546	0.693	0.232	0
Lypd1	0	0.812421	0.608	0.238	0
R3hdm1	0	1.14848	0.996	0.935	0
Thsd7b	0	-1.07588	0.419	0.527	0
Gm16083	0	-0.535994	0.5	0.622	0
Lemd1	0	-0.311449	0.083	0.25	0
Nfasc	0	-0.394122	0.914	0.874	0
Mdm4	0	-0.350216	0.837	0.813	0
Pik3c2b	0	-0.310934	0.162	0.351	0
Plekha6	0	-0.427218	0.748	0.796	0
Atp2b4	0	0.483556	0.808	0.503	0
Ppfia4	0	-0.400613	0.169	0.457	0
Shisa4	0	0.384013	0.701	0.332	0
Nav1	0	-0.523195	0.9	0.877	0
Igfn1	0	0.286491	0.198	0.006	0
Dennd1b	0	-0.525533	0.665	0.767	0
Kcnt2	0	1.09592	0.886	0.431	0
4930590L20Rik	0	0.393088	0.537	0.151	0
Brinp3	0	0.529171	0.872	0.668	0
Rgl1	0	0.769535	0.931	0.64	0
Apobec4	0	0.372528	0.583	0.195	0
Cacna1e	0	0.631728	0.992	0.864	0
Brinp2	0	0.625639	0.907	0.597	0
Tnr	0	0.861104	0.983	0.743	0
Rabgap1l	0	0.288142	0.991	0.941	0
Gm36975	0	0.285862	0.911	0.744	0
Dnm3	0	-1.14103	0.834	0.943	0
Dcaf6	0	0.271002	0.953	0.82	0
Ildr2	0	0.438218	0.902	0.513	0
Lmx1a	0	-0.833484	0.03	0.353	0
Pbx1	0	-1.4771	0.989	0.958	0
Pea15a	0	0.270095	0.721	0.416	0
Kcnj9	0	0.316429	0.602	0.21	0
Pld5	0	-1.17215	0.165	0.46	0
Zbtb18	0	0.290679	0.481	0.123	0
Kif26b	0	-0.71656	0.606	0.699	0
Smyd3	0	-0.477479	0.918	0.913	0
Stum	0	0.800857	0.778	0.198	0
Cnih3	0	0.921492	0.806	0.171	0
Enah	0	-0.534533	0.96	0.93	0
Esrrg	0	-0.693286	0.764	0.799	0
Gm36388	0	-0.317581	0.245	0.413	0
Ptpn14	0	0.555091	0.546	0.04	0
Kcnh1	0	0.65769	0.777	0.323	0
Plxna2	0	0.258889	0.905	0.709	0
Frmd4a	0	-0.49767	0.993	0.963	0
Bend7	0	-0.364955	0.118	0.295	0
Gm26776	0	0.334447	0.335	0.012	0
Ccdc3	0	0.637592	0.485	0.029	0
Camk1d	0	0.557987	0.996	0.938	0
Celf2	0	2.11471	0.998	0.962	0
Gm26565	0	0.73283	0.687	0.11	0
Itga8	0	0.744782	0.638	0.125	0
C1ql3	0	1.46457	0.811	0.203	0
St8sia6	0	-0.335521	0.1	0.286	0
Plxdc2	0	0.465829	0.891	0.497	0
Dnajc1	0	0.510073	0.953	0.791	0
Gpr158	0	-0.696741	0.983	0.943	0
Grin1	0	0.499039	0.984	0.846	0
Olfm1	0	0.950302	0.947	0.519	0
Ntng2	0	0.602683	0.569	0.153	0
Fnbp1	0	-0.522942	0.869	0.845	0
Lmx1b	0	-0.742024	0.058	0.425	0
Mvb12b	0	-0.364485	0.708	0.718	0
Pbx3	0	-2.33859	0.428	0.75	0
C79798	0	-0.530006	0.072	0.369	0
Dennd1a	0	0.26457	0.987	0.94	0
Lhx2	0	0.397854	0.46	0.056	0
Arhgap15	0	0.706049	0.621	0.137	0
Gtdc1	0	0.726578	0.952	0.687	0
Zeb2	0	0.913965	0.816	0.234	0
Gm13481	0	0.483312	0.384	0.136	0
Acvr2a	0	0.826866	0.907	0.624	0
Cacnb4	0	0.49007	0.964	0.871	0
Kcnj3	0	0.702503	0.973	0.668	0
Nr4a2	0	-0.466116	0.228	0.45	0
Acvr1c	0	0.336702	0.411	0.113	0
Ccdc148	0	0.403549	0.918	0.698	0
Gm11099	0	0.2971	0.692	0.388	0
Tanc1	0	0.35001	0.68	0.29	0
Rbms1	0	-0.94174	0.334	0.628	0
Slc4a10	0	0.325165	0.976	0.875	0
Kcnh7	0	0.998301	0.974	0.62	0
Fign	0	0.408218	0.413	0.179	0
Scn3a	0	-0.790738	0.847	0.848	0
Gm13629	0	-0.903296	0.253	0.57	0
Scn9a	0	-1.13135	0.393	0.745	0
B3galt1	0	-1.18986	0.982	0.946	0
Stk39	0	-0.440879	0.899	0.846	0
Cers6	0	0.326419	0.931	0.737	0
Pdk1	0	0.250994	0.629	0.337	0
Rapgef4	0	0.442908	0.987	0.877	0
Chn1	0	0.565081	0.977	0.844	0
2600014E21Rik	0	0.264069	0.276	0.039	0
Ube2e3	0	0.318753	0.692	0.347	0
Itga4	0	0.423111	0.44	0.063	0
Cerkl	0	0.278609	0.367	0.067	0
Pde1a	0	1.12951	0.982	0.724	0
Itgav	0	0.294371	0.366	0.106	0
Ptprj	0	0.287213	0.942	0.786	0
Celf1	0	0.385004	0.976	0.871	0
Lrrc4c	0	0.889789	0.993	0.945	0
4930445B16Rik	0	0.270394	0.564	0.319	0
D430041D05Rik	0	0.643262	0.967	0.788	0
Gm13883	0	0.266661	0.568	0.29	0
Tcp11l1	0	-0.530583	0.622	0.709	0
Mpped2	0	-0.755244	0.687	0.78	0
Ano3	0	1.2248	0.856	0.419	0
Scg5	0	-0.483718	0.882	0.87	0
Meis2	0	0.517158	0.556	0.178	0
Spred1	0	0.384081	0.804	0.571	0
Rasgrp1	0	0.408706	0.724	0.276	0
Itpka	0	0.717349	0.742	0.1	0
Tyro3	0	0.420508	0.582	0.146	0
Trp53bp1	0	-0.381857	0.751	0.768	0
Sema6d	0	-1.87682	0.717	0.832	0
Kcnip3	0	0.587952	0.824	0.462	0
Sirpa	0	0.410963	0.813	0.438	0
Lzts3	0	0.338251	0.682	0.319	0
4930402H24Rik	0	-0.278489	0.984	0.949	0
Plcb1	0	0.880272	0.991	0.878	0
9630028H03Rik	0	0.407784	0.784	0.46	0
Plcb4	0	-2.11551	0.266	0.825	0
Gm14211	0	-0.355491	0.022	0.303	0
Lamp5	0	0.286999	0.317	0.039	0
Pak7	0	0.580077	0.956	0.756	0
Snap25	0	0.271486	0.998	0.974	0
Macrod2	0	0.294866	0.995	0.971	0
Pcsk2	0	0.550082	0.977	0.84	0
Slc24a3	0	-0.60514	0.907	0.894	0
Rin2	0	-0.596192	0.17	0.455	0
9030622O22Rik	0	-1.38313	0.03	0.396	0
Uqcc1	0	-0.36555	0.351	0.507	0
Dlgap4	0	0.346978	0.942	0.742	0
Soga1	0	-0.371978	0.295	0.47	0
Snhg11	0	-0.645802	1	0.993	0
Chd6	0	-0.32027	0.907	0.869	0
Ptprt	0	0.827705	0.83	0.426	0
Tox2	0	-0.784409	0.227	0.618	0
Pkig	0	0.502249	0.801	0.521	0
Zmynd8	0	-0.30222	0.926	0.893	0
Sulf2	0	-0.333451	0.11	0.298	0
Prex1	0	0.358211	0.493	0.136	0
Kcnb1	0	0.488133	0.876	0.559	0
Kcng1	0	0.465031	0.501	0.051	0
Fam210b	0	-0.334838	0.061	0.287	0
Stx16	0	-0.459298	0.753	0.788	0
Gnas	0	-0.629033	0.967	0.949	0
Zfp831	0	0.642248	0.706	0.121	0
Ntsr1	0	-0.424282	0.148	0.317	0
Gm27032	0	0.404998	0.797	0.432	0
Chrna4	0	-0.264032	0.097	0.283	0
Clcn5	0	-0.36237	0.221	0.414	0
Pcsk1n	0	-0.81671	0.886	0.9	0
Gm26652	0	0.313651	0.482	0.112	0
Klhl13	0	-0.803886	0.156	0.505	0
Dock11	0	-0.635747	0.08	0.414	0
Il13ra1	0	-0.389014	0.058	0.301	0
Zcchc12	0	-0.523931	0.235	0.482	0
Tmem255a	0	-0.66284	0.267	0.521	0
Gria3	0	0.924389	0.991	0.865	0
Gpc4	0	0.426947	0.427	0.056	0
Fgf13	0	-0.906666	0.71	0.777	0
Mamld1	0	0.361208	0.717	0.36	0
Gabra3	0	0.28012	0.849	0.645	0
Il1rapl1	0	0.624711	0.993	0.901	0
Las1l	0	-0.391166	0.76	0.75	0
Eda	0	0.573745	0.748	0.415	0
Hdac8	0	-0.559038	0.804	0.823	0
Phka1	0	-0.78084	0.24	0.634	0
Slc16a2	0	0.525991	0.922	0.648	0
Pbdc1	0	-0.555569	0.43	0.539	0
5330434G04Rik	0	-1.07724	0.88	0.919	0
Gm44593	0	-0.323439	0.024	0.202	0
Diaph2	0	0.451812	0.933	0.79	0
Bhlhb9	0	0.265155	0.644	0.335	0
Tmem164	0	-0.488529	0.494	0.613	0
Ammecr1	0	-0.823978	0.565	0.697	0
Trpc5	0	0.872953	0.833	0.381	0
Rtl4	0	0.846215	0.921	0.499	0
Huwe1	0	-0.343798	0.941	0.909	0
Iqsec2	0	0.615174	0.915	0.614	0
Cnksr2	0	1.1004	0.982	0.837	0
Rps6ka3	0	0.260226	0.914	0.744	0
Cdkl5	0	0.363918	0.87	0.593	0
Nhs	0	-1.27093	0.194	0.646	0
Reps2	0	0.333014	0.927	0.74	0
Gpm6b	0	1.01781	0.975	0.647	0
Arhgap6	0	0.323854	0.762	0.531	0
2700069I18Rik	0	-0.380699	0.069	0.294	0
Zfhx4	0	-0.982426	0.31	0.637	0
Pag1	0	-0.500398	0.393	0.564	0
Cyp7b1	0	0.401828	0.602	0.252	0
Tbl1xr1	0	0.317784	0.809	0.515	0
Nlgn1	0	0.858736	0.999	0.982	0
Tnik	0	0.49567	0.988	0.831	0
Egfem1	0	0.930851	0.825	0.575	0
Slc7a14	0	0.648008	0.849	0.477	0
Mfn1	0	-0.440331	0.661	0.713	0
Hspa4l	0	-0.399986	0.687	0.718	0
Sclt1	0	-0.411741	0.877	0.848	0
D3Ertd751e	0	-0.421548	0.541	0.631	0
Maml3	0	-0.911423	0.541	0.699	0
Dclk1	0	0.580679	0.995	0.945	0
Gm21954	0	0.477181	0.758	0.387	0
Nbea	0	0.30369	0.993	0.967	0
Med12l	0	-0.353996	0.923	0.881	0
Rap2b	0	0.271532	0.51	0.16	0
Gm21949	0	-0.58059	0.408	0.526	0
Gm20754	0	0.884008	0.86	0.429	0
4930509J09Rik	0	0.559259	0.675	0.259	0
Rapgef2	0	0.342375	0.954	0.818	0
Gria2	0	0.59359	0.999	0.97	0
Gucy1b1	0	0.307455	0.696	0.371	0
Gucy1a1	0	0.287238	0.447	0.15	0
Fbxw7	0	0.452447	0.921	0.677	0
Dclk2	0	-0.422146	0.792	0.801	0
Kirrel	0	-0.300043	0.044	0.243	0
Arhgef11	0	-0.380535	0.839	0.82	0
Gm3764	0	0.303964	0.717	0.197	0
Arhgef2	0	0.250615	0.665	0.329	0
Kcnn3	0	-0.775447	0.715	0.669	0
Pip5k1a	0	0.27482	0.883	0.663	0
Zfp697	0	0.774252	0.882	0.543	0
Man1a2	0	0.465531	0.947	0.769	0
Igsf3	0	-0.306693	0.115	0.31	0
Atp1a1	0	0.369682	0.759	0.412	0
Magi3	0	0.592907	0.962	0.802	0
Fam212b	0	0.356775	0.488	0.067	0
Gm42722	0	0.259232	0.436	0.131	0
Sort1	0	0.403481	0.906	0.667	0
Amy1	0	-0.598319	0.617	0.735	0
Rnpc3	0	-0.482934	0.716	0.766	0
Col11a1	0	-0.837143	0.062	0.326	0
Olfm3	0	-1.3728	0.209	0.657	0
Plppr4	0	0.429734	0.923	0.723	0
Dpyd	0	1.06316	0.953	0.72	0
6530403H02Rik	0	1.97446	0.827	0.169	0
Arhgap29	0	0.382387	0.594	0.323	0
Ndst3	0	0.252082	0.813	0.544	0
Ndst4	0	0.561223	0.533	0.311	0
Arsj	0	0.474889	0.426	0.059	0
Camk2d	0	0.609763	0.979	0.868	0
Sec24b	0	-0.369227	0.831	0.811	0
Sgms2	0	-0.310234	0.05	0.277	0
Gm26691	0	-0.59801	0.646	0.731	0
Cxxc4	0	-0.333864	0.45	0.574	0
Nfkb1	0	-0.406978	0.576	0.666	0
Ppp3ca	0	0.566963	0.997	0.962	0
Tspan5	0	1.01315	0.947	0.699	0
Lmo4	0	0.601682	0.799	0.471	0
Ddah1	0	-0.720098	0.438	0.625	0
Ak5	0	1.50091	0.982	0.521	0
Pigk	0	0.784078	0.952	0.73	0
St6galnac5	0	1.04319	0.943	0.615	0
St6galnac3	0	0.25423	0.924	0.733	0
Negr1	0	0.87369	0.994	0.949	0
B230334C09Rik	0	0.329215	0.891	0.55	0
Lrrc7	0	0.875861	0.996	0.947	0
Wls	0	0.499143	0.581	0.214	0
Nsmaf	0	-0.419825	0.502	0.628	0
Chd7	0	-0.496742	0.072	0.334	0
Clvs1	0	-0.509653	0.887	0.844	0
Necab1	0	0.337521	0.783	0.446	0
Nkain3	0	0.73567	0.873	0.704	0
Pou3f2	0	-0.427444	0.053	0.281	0
Klhl32	0	-1.05045	0.559	0.793	0
Epha7	0	0.494786	0.807	0.54	0
Bach2	0	-0.877901	0.679	0.796	0
Cnr1	0	0.505579	0.671	0.219	0
Mob3b	0	-0.957064	0.143	0.377	0
Lingo2	0	0.774416	0.986	0.915	0
Gm2163	0	0.340418	0.876	0.701	0
4930578G10Rik	0	0.406591	0.807	0.553	0
Gm12394	0	0.262595	0.714	0.488	0
Phf24	0	0.687315	0.949	0.67	0
Unc13b	0	0.507452	0.899	0.638	0
Frmpd1	0	-0.598122	0.037	0.404	0
Gabbr2	0	0.416836	0.982	0.87	0
Nr4a3	0	0.293759	0.305	0.089	0
Tmeff1	0	0.30689	0.733	0.418	0
Smc2	0	0.261118	0.481	0.231	0
Zfp462	0	-0.43789	0.783	0.815	0
E130308A19Rik	0	-0.759725	0.436	0.681	0
Whrn	0	-0.699198	0.113	0.477	0
Pappa	0	-0.594033	0.056	0.28	0
Brinp1	0	0.542033	0.975	0.78	0
Frmd3	0	-0.47084	0.601	0.676	0
Ptprd	0	1.91975	0.998	0.968	0
Gm42303	0	0.526128	0.654	0.255	0
Nfib	0	1.50283	0.931	0.293	0
Bnc2	0	-1.61712	0.041	0.425	0
Sh3gl2	0	0.558699	0.97	0.829	0
Dennd4c	0	-0.362294	0.592	0.661	0
Elavl2	0	-1.53577	0.762	0.879	0
Kank4	0	-0.354405	0.047	0.272	0
Cachd1	0	-0.582123	0.386	0.587	0
Dnajc6	0	-0.404421	0.95	0.908	0
Lepr	0	-0.410688	0.11	0.264	0
Sgip1	0	-0.319005	0.986	0.95	0
Dab1	0	0.411391	0.983	0.879	0
Zcchc11	0	-0.396452	0.9	0.872	0
3110021N24Rik	0	-0.406224	0.637	0.684	0
Osbpl9	0	-0.987246	0.822	0.898	0
Elavl4	0	-0.943467	0.797	0.85	0
Agbl4	0	-0.346076	0.981	0.951	0
Trabd2b	0	0.469833	0.319	0.025	0
Faah	0	0.420087	0.785	0.418	0
Mast2	0	-0.441325	0.861	0.852	0
Hivep3	0	0.419794	0.971	0.859	0
Scmh1	0	-0.334411	0.922	0.882	0
Rims3	0	-0.481515	0.154	0.452	0
Macf1	0	-0.298251	0.989	0.967	0
Gm2164	0	-0.456261	0.071	0.283	0
Grik3	0	-1.05497	0.347	0.665	0
Zmym1	0	0.304782	0.758	0.441	0
Dlgap3	0	0.459836	0.891	0.611	0
Adgrb2	0	0.428032	0.823	0.441	0
Ptpru	0	-0.548974	0.404	0.556	0
Epb41	0	-0.790206	0.387	0.652	0
Man1c1	0	0.389551	0.749	0.427	0
Rcan3	0	-0.368727	0.097	0.37	0
Zfp46	0	0.413711	0.545	0.099	0
Ephb2	0	-0.536267	0.448	0.638	0
Camk2n1	0	0.415749	0.834	0.58	0
Vwa5b1	0	-0.486026	0.042	0.277	0
Ubr4	0	-0.585714	0.578	0.661	0
Arhgef10l	0	-0.487732	0.113	0.455	0
Kazn	0	-0.420483	0.406	0.533	0
Gm13052	0	-0.435101	0.471	0.573	0
C230088H06Rik	0	-0.326016	0.272	0.421	0
Rere	0	-0.278012	0.986	0.958	0
Camta1	0	-0.592521	0.963	0.93	0
Plekhg5	0	0.459616	0.701	0.294	0
Plch2	0	0.336944	0.541	0.162	0
Ski	0	0.274389	0.762	0.47	0
Akap9	0	-0.536901	0.824	0.848	0
Sema3a	0	0.463961	0.437	0.104	0
Cacna2d1	0	1.12064	0.991	0.846	0
Hgf	0	0.343932	0.298	0.029	0
Magi2	0	-0.526212	0.993	0.98	0
Reln	0	0.877487	0.381	0.137	0
Lhfpl3	0	-1.70041	0.663	0.853	0
Kmt2e	0	-0.342185	0.937	0.9	0
Prkag2	0	0.55212	0.91	0.701	0
1500035N22Rik	0	0.286121	0.508	0.179	0
Actr3b	0	0.298918	0.814	0.546	0
Dpp6	0	-0.911919	0.986	0.964	0
Cnpy1	0	-0.533681	0.05	0.349	0
9530036O11Rik	0	-0.428866	0.228	0.413	0
Otof	0	0.542947	0.461	0.092	0
Dpysl5	0	-0.757497	0.269	0.644	0
Slc30a3	0	0.67174	0.608	0.056	0
Yes1	0	-0.36177	0.269	0.445	0
Zfyve28	0	0.520176	0.87	0.516	0
Ablim2	0	0.452497	0.924	0.763	0
Afap1	0	-0.315628	0.127	0.343	0
Ldb2	0	0.769619	0.772	0.548	0
Fam184b	0	0.252631	0.527	0.26	0
Stim2	0	0.251705	0.749	0.522	0
Atp8a1	0	0.336619	0.958	0.815	0
Gabra2	0	1.10748	0.97	0.624	0
Slc10a4	0	-0.406343	0.022	0.284	0
Fryl	0	-0.510925	0.849	0.794	0
Usp46	0	0.367625	0.829	0.532	0
C530008M17Rik	0	-0.606565	0.576	0.664	0
Sept11	0	0.600436	0.901	0.585	0
Fras1	0	0.331215	0.748	0.407	0
Prkg2	0	0.405883	0.634	0.261	0
Wdfy3	0	-0.300294	0.948	0.901	0
Arhgap24	0	-0.861037	0.201	0.53	0
Mapk10	0	0.408269	0.989	0.935	0
Ephx4	0	0.33629	0.536	0.15	0
Gm10419	0	0.345082	0.783	0.479	0
Cplx1	0	-0.656207	0.591	0.626	0
Galnt9	0	0.267118	0.61	0.39	0
Ttc28	0	-0.831616	0.626	0.739	0
Miat	0	0.426203	0.976	0.833	0
Svop	0	0.258333	0.891	0.704	0
Cabp1	0	0.39087	0.739	0.321	0
Cit	0	-0.654666	0.894	0.841	0
Tesc	0	0.366115	0.547	0.141	0
Rasal1	0	0.607153	0.73	0.167	0
Cux2	0	-0.471336	0.425	0.675	0
Camkk2	0	0.48005	0.833	0.489	0
Wdr66	0	0.255928	0.4	0.085	0
Pitpnm2	0	0.434333	0.795	0.538	0
Rilpl1	0	0.49092	0.642	0.246	0
Tmem132b	0	0.378392	0.972	0.795	0
Tmem132c	0	-0.487584	0.077	0.267	0
Tmem132d	0	0.97778	0.798	0.355	0
Rimbp2	0	0.353786	0.949	0.826	0
Mmp17	0	0.382887	0.583	0.16	0
Caln1	0	0.382627	0.967	0.749	0
Galnt17	0	0.674969	0.952	0.628	0
Auts2	0	0.394602	0.994	0.956	0
Gm42439	0	0.301937	0.832	0.581	0
Gtf2ird1	0	-0.534191	0.636	0.747	0
Stx1a	0	0.499218	0.763	0.359	0
Cux1	0	-0.421289	0.663	0.788	0
Ap1s1	0	0.351499	0.692	0.332	0
Ache	0	-0.451651	0.205	0.464	0
Elfn1	0	-0.38654	0.076	0.301	0
Snx8	0	-0.252091	0.081	0.282	0
Sdk1	0	-1.93365	0.503	0.774	0
Mmd2	0	0.323811	0.584	0.197	0
Tmem130	0	-0.575065	0.67	0.74	0
Wasf3	0	-0.653648	0.598	0.731	0
Dync1i1	0	-0.401964	0.964	0.919	0
Slc25a13	0	-0.370898	0.027	0.255	0
Ica1	0	-0.354202	0.934	0.876	0
Nxph1	0	-2.52872	0.173	0.512	0
Foxp2	0	-2.14664	0.284	0.694	0
Cttnbp2	0	0.772911	0.986	0.858	0
Ptprz1	0	-0.922957	0.721	0.75	0
Grm8	0	0.4661	0.764	0.547	0
Ccdc136	0	-0.511997	0.619	0.675	0
Ahcyl2	0	0.341642	0.965	0.865	0
Ptn	0	0.589628	0.777	0.346	0
Dgki	0	0.390491	0.984	0.9	0
1700111E14Rik	0	0.266778	0.724	0.464	0
Ubn2	0	-0.315716	0.976	0.939	0
Hipk2	0	-0.7119	0.665	0.772	0
Kdm7a	0	0.316971	0.819	0.56	0
Gsdme	0	-0.508771	0.632	0.701	0
Osbpl3	0	-0.725746	0.172	0.468	0
Hibadh	0	-0.382355	0.484	0.599	0
Chn2	0	-0.579814	0.121	0.359	0
Nap1l5	0	-0.584282	0.65	0.751	0
Ccser1	0	-0.435967	0.991	0.961	0
Ndnf	0	-0.448913	0.029	0.185	0
Reep1	0	-0.457071	0.873	0.848	0
St3gal5	0	0.439207	0.784	0.432	0
Lrrtm4	0	1.56533	0.992	0.858	0
Add2	0	0.306546	0.926	0.747	0
Podxl2	0	-0.608511	0.448	0.662	0
Slc6a6	0	0.320061	0.913	0.696	0
Grip2	0	-1.08135	0.139	0.563	0
9530026P05Rik	0	0.281119	0.581	0.295	0
Fam19a1	0	2.66218	0.972	0.56	0
Frmd4b	0	-1.50044	0.365	0.695	0
Gm43948	0	0.404723	0.427	0.053	0
Pdzrn3	0	1.81206	0.668	0.215	0
Cntn3	0	1.02003	0.948	0.501	0
4930587E11Rik	0	0.467702	0.589	0.177	0
Cntn4	0	0.653724	0.934	0.732	0
Itpr1	0	0.314124	0.783	0.617	0
Grm7	0	1.24652	0.996	0.809	0
Slc6a1	0	-0.665426	0.102	0.419	0
Syn2	0	1.19499	0.992	0.717	0
Timp4	0	0.502188	0.729	0.244	0
Pparg	0	0.329745	0.396	0.152	0
Plxnd1	0	0.348787	0.403	0.025	0
Rasgef1a	0	0.640218	0.95	0.675	0
Ret	0	-1.26457	0.068	0.547	0
Iqsec3	0	-0.473391	0.574	0.654	0
Ccnd2	0	0.701191	0.707	0.143	0
Prmt8	0	0.729287	0.789	0.252	0
Grin2b	0	0.877724	0.996	0.949	0
Gucy2c	0	-0.381425	0.039	0.266	0
Rerg	0	-0.492198	0.226	0.468	0
Eps8	0	-0.469473	0.166	0.416	0
Sox5	0	0.850072	0.819	0.342	0
Dennd5b	0	-0.377194	0.873	0.853	0
Prkcg	0	0.815692	0.946	0.619	0
Gm44151	0	0.353445	0.882	0.609	0
Ttyh1	0	0.297109	0.859	0.585	0
Zim1	0	-0.540228	0.089	0.375	0
Peg3	0	-1.27321	0.885	0.933	0
Usp29	0	-1.92689	0.711	0.92	0
Slc8a2	0	0.28517	0.623	0.277	0
Grik5	0	0.259622	0.929	0.758	0
Tmem91	0	-0.365114	0.342	0.522	0
Actn4	0	0.290487	0.781	0.499	0
Tshz3	0	0.332606	0.64	0.328	0
Zfp976	0	-0.25856	0.128	0.312	0
Zfp975	0	-0.305721	0.24	0.423	0
Slc17a7	0	1.22952	0.955	0.212	0
Grin2d	0	-0.355853	0.22	0.428	0
Ano5	0	-0.32036	0.071	0.242	0
Slc17a6	0	-0.537312	0.183	0.333	0
Cyfip1	0	0.403396	0.821	0.537	0
Gabrb3	0	0.463909	0.992	0.946	0
Gm44643	0	0.278384	0.615	0.284	0
B230209E15Rik	0	0.442523	0.92	0.68	0
A230057D06Rik	0	-0.523011	0.988	0.955	0
Otud7a	0	0.775273	0.987	0.908	0
Apba2	0	0.806264	0.972	0.743	0
Fam189a1	0	0.753376	0.98	0.811	0
Tjp1	0	0.408168	0.985	0.921	0
Pcsk6	0	-0.343154	0.045	0.197	0
Mef2a	0	-0.421023	0.889	0.866	0
Nr2f2	0	0.556768	0.659	0.217	0
Rgma	0	-0.268154	0.112	0.268	0
Chd2	0	-0.410795	0.875	0.854	0
Sv2b	0	1.30814	0.949	0.538	0
Ntrk3	0	0.416275	0.968	0.84	0
Mir9-3hg	0	0.586679	0.829	0.316	0
Cemip	0	0.34244	0.425	0.131	0
Grm5	0	1.23359	0.996	0.903	0
Me3	0	0.520047	0.951	0.722	0
Dlg2	0	0.82169	0.998	0.984	0
Gm32647	0	0.461798	0.67	0.427	0
Tenm4	0	0.789859	0.987	0.818	0
Gm15414	0	0.258275	0.526	0.213	0
Gab2	0	-0.806533	0.753	0.823	0
Rnf169	0	0.399285	0.881	0.604	0
Pgm2l1	0	0.254716	0.821	0.576	0
Fchsd2	0	-0.648613	0.866	0.887	0
Rnf121	0	0.329518	0.853	0.638	0
Cckbr	0	0.282484	0.386	0.053	0
Galnt18	0	0.815251	0.937	0.468	0
Mical2	0	0.845668	0.931	0.559	0
Arntl	0	0.348951	0.776	0.465	0
Spon1	0	0.324578	0.688	0.39	0
Rras2	0	0.259117	0.652	0.378	0
Sox6	0	-1.54222	0.12	0.393	0
Plekha7	0	-0.806086	0.472	0.709	0
Xylt1	0	0.35093	0.869	0.662	0
Crym	0	0.407418	0.579	0.138	0
Hs3st2	0	0.374075	0.32	0.108	0
Prkcb	0	0.425873	0.967	0.897	0
Cacng3	0	0.960151	0.922	0.512	0
Gm45846	0	-0.675333	0.495	0.732	0
Tnrc6a	0	-0.479311	0.514	0.658	0
Acadsb	0	-0.404183	0.754	0.76	0
Ebf3	0	-1.22384	0.026	0.387	0
Th	0	-1.30127	0.055	0.475	0
Shank2	0	0.593961	0.968	0.79	0
Ipcef1	0	0.311368	0.527	0.226	0
Ust	0	0.264821	0.611	0.259	0
Stxbp5	0	0.306505	0.938	0.774	0
Gm28905	0	-1.13204	0.539	0.652	0
Hivep2	0	0.885523	0.992	0.901	0
Gm26835	0	0.702625	0.956	0.687	0
Map3k5	0	0.519571	0.83	0.525	0
Map7	0	0.388998	0.94	0.719	0
Ptprk	0	1.26804	0.948	0.643	0
Rspo3	0	0.334224	0.405	0.105	0
Gm48159	0	0.288505	0.292	0.025	0
Nkain2	0	0.650908	0.997	0.969	0
Hs3st5	0	-1.26391	0.396	0.627	0
Rev3l	0	-0.628963	0.892	0.898	0
Cdc40	0	0.332913	0.769	0.486	0
Wasf1	0	0.833773	0.941	0.57	0
Sobp	0	0.629947	0.976	0.874	0
Hace1	0	0.634826	0.908	0.608	0
Slc35f1	0	-1.00732	0.85	0.841	0
Fam184a	0	-1.35136	0.611	0.781	0
Man1a	0	0.977037	0.628	0.304	0
Sh3rf3	0	0.602019	0.931	0.637	0
Tet1	0	-0.352528	0.242	0.416	0
Zfp365	0	0.278471	0.577	0.222	0
Arid5b	0	0.268415	0.884	0.653	0
Bicc1	0	-0.530522	0.422	0.604	0
AC121788.1	0	0.718514	0.317	0.083	0
R3hdm4	0	0.282226	0.703	0.369	0
Matk	0	0.311201	0.875	0.604	0
Celf5	0	0.46866	0.921	0.609	0
Gm16105	0	0.253517	0.627	0.294	0
Ankrd24	0	-0.626294	0.401	0.649	0
Nuak1	0	0.269241	0.56	0.285	0
Btbd11	0	-1.45488	0.102	0.701	0
Igf1	0	-0.55366	0.029	0.286	0
Rmst	0	-1.38198	0.288	0.537	0
Cfap54	0	0.333604	0.692	0.364	0
Cdk17	0	0.472	0.939	0.717	0
Ntn4	0	-0.325758	0.036	0.272	0
Tmcc3	0	-1.23348	0.451	0.617	0
Gm10754	0	0.629483	0.535	0.184	0
Atp2b1	0	0.544111	0.986	0.793	0
Kitl	0	0.440289	0.629	0.17	0
Lin7a	0	0.357845	0.859	0.666	0
Ppp1r12a	0	0.257398	0.957	0.85	0
Nav3	0	1.23851	0.995	0.907	0
Osbpl8	0	0.38306	0.903	0.742	0
Kcnc2	0	-1.29195	0.705	0.814	0
Trhde	0	0.332229	0.544	0.289	0
Ptprr	0	0.37627	0.899	0.724	0
Kcnmb4	0	0.278424	0.547	0.186	0
Grip1	0	-1.07469	0.943	0.932	0
Srgap1	0	-1.37092	0.43	0.781	0
Fam19a2	0	1.40078	0.931	0.525	0
Slc16a7	0	0.73872	0.91	0.54	0
Kif5a	0	-0.375506	0.856	0.828	0
Ctxn1	0	0.382504	0.658	0.215	0
Fam155a	0	-0.416181	0.997	0.975	0
Myo16	0	0.497034	0.863	0.445	0
Col4a1	0	0.457738	0.691	0.275	0
Col4a2	0	0.41502	0.822	0.495	0
Dlgap2	0	1.52977	0.993	0.771	0
Csmd1	0	0.629705	0.999	0.974	0
Gm26804	0	-0.33609	0.98	0.943	0
Ank1	0	-0.876655	0.513	0.732	0
Tacc1	0	0.451991	0.93	0.711	0
Fgfr1	0	-0.406702	0.225	0.428	0
Chrnb3	0	-0.840818	0.022	0.36	0
Chrna6	0	-0.608735	0.035	0.323	0
Unc5d	0	1.06163	0.899	0.576	0
Nrg1	0	0.793136	0.996	0.91	0
Tnks	0	-0.364214	0.796	0.778	0
Gm19410	0	0.338759	0.36	0.026	0
Micu3	0	-0.399446	0.839	0.82	0
Zdhhc2	0	-0.660459	0.762	0.797	0
Mtus1	0	-0.561788	0.071	0.444	0
B430010I23Rik	0	-0.262513	0.025	0.229	0
Sorbs2	0	1.27537	0.994	0.913	0
Gm16351	0	0.455934	0.693	0.327	0
Sorbs2os	0	1.07286	0.96	0.686	0
Snx25	0	-0.367771	0.39	0.543	0
4930555F03Rik	0	-0.677333	0.197	0.385	0
Gm45321	0	-0.569754	0.13	0.332	0
Gm45323	0	-0.569832	0.142	0.346	0
Gm45341	0	-0.379908	0.096	0.26	0
Gm2516	0	-0.467607	0.125	0.311	0
C130073E24Rik	0	-0.957571	0.296	0.517	0
Wdr17	0	0.659452	0.928	0.695	0
Gpm6a	0	0.36241	0.981	0.907	0
Galntl6	0	-2.43392	0.814	0.922	0
Gm26905	0	-1.66504	0.446	0.741	0
Spock3	0	-1.11602	0.627	0.743	0
Cpe	0	0.328502	0.975	0.881	0
Klhl2	0	0.37415	0.869	0.592	0
Csgalnact1	0	0.860504	0.822	0.271	0
Ints10	0	0.332712	0.836	0.546	0
Lzts1	0	0.795378	0.796	0.234	0
Mast3	0	0.560861	0.767	0.269	0
Large1	0	0.729659	0.989	0.938	0
Arhgap10	0	0.837377	0.736	0.17	0
Rnf150	0	0.787355	0.957	0.703	0
Clgn	0	-0.537145	0.278	0.479	0
Cacna1a	0	-0.530919	0.982	0.951	0
Nfix	0	0.353768	0.646	0.194	0
Rtbdn	0	-0.271273	0.205	0.36	0
Phkb	0	-0.399701	0.704	0.731	0
Chd9	0	-0.336945	0.966	0.933	0
Cx3cl1	0	0.262641	0.74	0.442	0
Nfatc3	0	-0.368887	0.518	0.602	0
Sntb2	0	0.503305	0.745	0.437	0
Zfhx3	0	-3.01827	0.408	0.813	0
Lncbate1	0	-0.327747	0.018	0.259	0
Zfp612	0	-0.371025	0.533	0.615	0
Znrf1	0	-0.401313	0.865	0.835	0
Cntnap4	0	-1.78179	0.491	0.782	0
Gm45904	0	-0.409295	0.152	0.372	0
Vat1l	0	-0.728956	0.467	0.641	0
Wwox	0	-0.522157	0.914	0.886	0
Cbfa2t3	0	0.307778	0.459	0.09	0
C230057M02Rik	0	0.524569	0.639	0.082	0
Ccsap	0	0.320013	0.516	0.133	0
Pgbd5	0	0.545068	0.878	0.546	0
Pcnx2	0	0.254067	0.885	0.688	0
Pard3	0	-1.00031	0.339	0.707	0
Nrp1	0	0.279814	0.602	0.338	0
Abhd6	0	0.308794	0.762	0.459	0
Synpr	0	0.612579	0.576	0.185	0
Lrrc3b	0	-0.916445	0.572	0.642	0
Thrb	0	0.859785	0.951	0.713	0
Gm48321	0	0.30798	0.583	0.268	0
Adk	0	-0.439931	0.724	0.763	0
Lrmda	0	-1.17205	0.158	0.466	0
Kcnma1	0	0.76488	0.995	0.96	0
Arhgap22	0	-0.362838	0.104	0.346	0
Glud1	0	-0.591216	0.594	0.712	0
Nrg3	0	0.478003	0.998	0.975	0
Nrg3os	0	0.43547	0.984	0.857	0
Gm20642	0	0.530784	0.985	0.842	0
Samd4	0	-0.990874	0.439	0.716	0
Gch1	0	-0.254562	0.018	0.195	0
Fbxo34	0	0.282067	0.808	0.587	0
Gm26782	0	-0.378794	0.146	0.404	0
Arhgef40	0	-0.32871	0.089	0.333	0
Cpne6	0	0.5409	0.821	0.389	0
Fam167a	0	-0.312521	0.019	0.235	0
Xkr6	0	-1.65364	0.44	0.847	0
Msra	0	0.960796	0.961	0.653	0
Ptk2b	0	1.13114	0.914	0.228	0
Dmtn	0	0.251127	0.863	0.637	0
Fndc3a	0	-0.810824	0.708	0.784	0
Lrch1	0	-0.790274	0.674	0.814	0
Siah3	0	-0.3209	0.192	0.357	0
Kctd4	0	0.385731	0.569	0.185	0
Enox1	0	0.990968	0.984	0.786	0
Gm6994	0	0.305376	0.542	0.206	0
Vwa8	0	-0.481188	0.832	0.836	0
Pcdh9	0	0.514925	0.997	0.953	0
Klhl1	0	-3.00976	0.209	0.709	0
Dach1	0	0.385465	0.462	0.234	0
Tbc1d4	0	-0.408344	0.116	0.345	0
Lmo7	0	0.78685	0.86	0.426	0
Mycbp2	0	-0.282425	0.993	0.969	0
Dzip1	0	-0.398488	0.552	0.65	0
Hs6st3	0	0.594484	0.814	0.667	0
Farp1	0	0.360771	0.962	0.831	0
Fgf14	0	0.258401	0.996	0.975	0
Gucy1a2	0	0.754292	0.977	0.826	0
Cntn5	0	0.428596	0.938	0.734	0
Ccdc82	0	-0.423136	0.237	0.456	0
Amotl1	0	-0.944872	0.102	0.559	0
Olfm2	0	-0.467655	0.388	0.586	0
Icam5	0	0.759643	0.807	0.145	0
Pde4a	0	0.267617	0.702	0.52	0
Plppr2	0	0.28075	0.79	0.509	0
Bbs9	0	-0.468477	0.681	0.728	0
Dpy19l1	0	0.276463	0.561	0.289	0
Opcml	0	0.501973	0.993	0.929	0
Aplp2	0	-0.378058	0.774	0.767	0
Arhgap32	0	0.486038	0.955	0.801	0
Kirrel3	0	0.609354	0.945	0.798	0
Cdon	0	0.251196	0.59	0.336	0
Pknox2	0	0.461606	0.873	0.635	0
Nrgn	0	0.847669	0.945	0.494	0
AW551984	0	-0.391481	0.04	0.288	0
Gramd1b	0	0.530039	0.956	0.789	0
Ubash3b	0	-0.629651	0.315	0.522	0
CT025619.1	0	-0.796963	0.851	0.876	0
Gm35835	0	0.250625	0.409	0.137	0
Sorl1	0	0.378827	0.822	0.562	0
Grik4	0	-1.04746	0.329	0.727	0
Arhgef12	0	-0.427171	0.881	0.867	0
Nectin1	0	0.411472	0.552	0.199	0
Kmt2a	0	-0.361379	0.951	0.913	0
Dscaml1	0	1.10744	0.885	0.369	0
Sik3	0	-0.626126	0.927	0.922	0
Cadm1	0	0.691602	0.992	0.878	0
Nxpe4	0	0.575176	0.824	0.571	0
Zbtb16	0	0.256898	0.564	0.28	0
Drd2	0	-1.17645	0.043	0.43	0
Ncam1	0	-0.493328	0.983	0.96	0
Lingo1	0	0.545326	0.922	0.635	0
Nptn	0	0.649302	0.994	0.915	0
Lrrc49	0	-0.355161	0.784	0.769	0
Smad3	0	0.887703	0.769	0.139	0
Dennd4a	0	0.250095	0.92	0.778	0
Pdcd7	0	-0.422077	0.268	0.469	0
Ubap1l	0	-0.496411	0.105	0.43	0
Usp3	0	0.325471	0.65	0.337	0
Car12	0	0.442948	0.381	0.087	0
Tpm1	0	0.250542	0.769	0.506	0
Rora	0	-0.583065	0.982	0.94	0
Fam81a	0	0.662842	0.761	0.216	0
Prtg	0	0.263143	0.488	0.223	0
Hmgcll1	0	-0.41331	0.752	0.777	0
Hcrtr2	0	-0.403918	0.06	0.208	0
Mlip	0	1.3184	0.792	0.219	0
Lrrc1	0	-0.310373	0.117	0.306	0
Filip1	0	0.333538	0.517	0.18	0
Mei4	0	0.273523	0.529	0.292	0
Snap91	0	-0.480071	0.954	0.922	0
Rasgrf1	0	0.317796	0.955	0.584	0
Slc9a9	0	0.357636	0.901	0.668	0
Clstn2	0	-1.05879	0.912	0.85	0
Mras	0	0.272084	0.75	0.473	0
Slco2a1	0	-0.454913	0.111	0.349	0
Dock3	0	0.310634	0.988	0.944	0
Cacna2d2	0	-1.09209	0.158	0.666	0
Camkv	0	0.610848	0.892	0.479	0
Traip	0	0.294321	0.485	0.151	0
Bsn	0	0.315857	0.949	0.764	0
Map4	0	-0.395602	0.875	0.854	0
Lrrfip2	0	-0.378622	0.661	0.709	0
Trank1	0	0.367558	0.963	0.805	0
Dclk3	0	0.271619	0.435	0.123	0
Arpp21	0	1.98154	0.996	0.548	0
Gm36251	0	0.455641	0.332	0.017	0
AU023762	0	0.277902	0.326	0.032	0
Clasp2	0	-0.447802	0.971	0.949	0
Rbms3	0	-2.51554	0.55	0.881	0
Gm45881	0	-1.29306	0.505	0.776	0
Ulk4	0	0.284728	0.751	0.45	0
Lyzl4	0	0.381043	0.437	0.03	0
Vipr1	0	0.376615	0.474	0.039	0
Nktr	0	-0.317631	0.96	0.916	0
Osbp2	0	0.559645	0.849	0.478	0
Rasl10a	0	0.250965	0.328	0.064	0
Adcy1	0	0.409494	0.841	0.511	0
Vwc2	0	-0.64421	0.152	0.384	0
Ddc	0	-2.37323	0.093	0.608	0
1700042O10Rik	0	-2.1344	0.038	0.565	0
Grb10	0	-1.25403	0.633	0.83	0
Cobl	0	0.671504	0.912	0.597	0
Cnrip1	0	0.311503	0.883	0.665	0
Peli1	0	0.293193	0.795	0.537	0
Ehbp1	0	-0.595991	0.954	0.919	0
Bcl11a	0	0.353584	0.661	0.441	0
5730522E02Rik	0	1.49295	0.977	0.697	0
Kcnip1	0	-0.959498	0.108	0.403	0
Dock2	0	-0.318551	0.031	0.261	0
Fam196b	0	-0.755493	0.048	0.447	0
Slit3	0	1.97356	0.987	0.472	0
Tenm2	0	0.402743	0.996	0.928	0
Gabrb2	0	0.371829	0.95	0.714	0
Ebf1	0	-1.41491	0.066	0.367	0
Col23a1	0	0.695736	0.524	0.115	0
Fstl4	0	0.939232	0.863	0.299	0
Glra1	0	-0.284482	0.045	0.197	0
Gria1	0	0.923728	0.99	0.883	0
Rnf112	0	0.476608	0.878	0.527	0
Gas7	0	0.741327	0.922	0.366	0
Glp2r	0	1.15019	0.968	0.396	0
Ntn1	0	-1.57141	0.087	0.514	0
Chd3	0	0.298304	0.865	0.601	0
Mink1	0	0.364373	0.862	0.578	0
Rap1gap2	0	0.30382	0.892	0.729	0
Rtn4rl1	0	0.704001	0.713	0.191	0
Nxn	0	-0.51358	0.137	0.355	0
Sez6	0	0.332676	0.667	0.303	0
Nlk	0	0.649015	0.968	0.851	0
Wsb1	0	-0.675208	0.726	0.81	0
Nf1	0	-0.430176	0.952	0.925	0
Asic2	0	0.459261	0.993	0.81	0
Ppm1e	0	0.591016	0.986	0.869	0
Msi2	0	-1.89742	0.827	0.915	0
Mmd	0	0.304071	0.608	0.268	0
Tom1l1	0	0.357308	0.532	0.127	0
Car10	0	1.53105	0.98	0.55	0
Srcin1	0	0.26401	0.929	0.742	0
Neurod2	0	0.364892	0.511	0.075	0
Thra	0	0.308044	0.936	0.75	0
Rapgefl1	0	0.524158	0.798	0.372	0
Krt12	0	0.534515	0.49	0.06	0
A830036E02Rik	0	0.885864	0.614	0.07	0
Hap1	0	0.258327	0.819	0.587	0
Stat5b	0	-0.578916	0.429	0.632	0
Rprml	0	0.367003	0.562	0.133	0
Gm11639	0	0.492381	0.375	0.071	0
Pitpnc1	0	-1.28951	0.345	0.696	0
Rgs9	0	-0.415328	0.099	0.302	0
Map2k6	0	0.44346	0.74	0.434	0
Sec14l1	0	0.295248	0.683	0.349	0
Tnrc6c	0	0.25124	0.989	0.927	0
Rbfox3	0	0.487402	0.973	0.825	0
Gaa	0	-0.580198	0.451	0.649	0
Nptx1	0	0.284538	0.455	0.134	0
Baiap2	0	1.15349	0.947	0.293	0
Rab40b	0	0.511654	0.778	0.35	0
Gm48530	0	0.562848	0.274	0.014	0
Adarb2	0	-3.6662	0.376	0.747	0
Ryr2	0	1.41721	0.988	0.665	0
Lgals8	0	-0.409726	0.245	0.484	0
Hecw1	0	0.347157	0.975	0.882	0
4933412O06Rik	0	0.386958	0.617	0.212	0
A530046M15Rik	0	0.320631	0.568	0.211	0
Carmil1	0	-0.511413	0.625	0.714	0
Ripor2	0	0.468282	0.891	0.566	0
Cdkal1	0	-0.354508	0.83	0.806	0
Mboat1	0	-0.388597	0.027	0.233	0
Gmds	0	-0.446656	0.916	0.88	0
Fars2	0	0.253544	0.922	0.763	0
Nrn1	0	0.445409	0.791	0.448	0
Gcnt2	0	0.311164	0.458	0.126	0
Hivep1	0	-0.332901	0.351	0.522	0
Phactr1	0	1.72674	0.994	0.846	0
Gm15810	0	0.425652	0.595	0.129	0
Gfod1	0	0.611203	0.878	0.529	0
Ranbp9	0	0.298706	0.914	0.716	0
Cap2	0	0.792648	0.938	0.692	0
Unc5a	0	0.327135	0.644	0.278	0
Spock1	0	0.576115	0.961	0.644	0
Klhl3	0	0.465486	0.877	0.599	0
Dapk1	0	0.423038	0.954	0.784	0
2010111I01Rik	0	0.286592	0.967	0.856	0
Cdc14b	0	-0.556347	0.49	0.658	0
Aaed1	0	-0.355986	0.26	0.456	0
Adcy2	0	0.371949	0.819	0.539	0
Nsun2	0	0.421126	0.741	0.394	0
Slc6a3	0	-1.62427	0.053	0.451	0
Cast	0	-0.381918	0.097	0.336	0
Mctp1	0	0.619113	0.965	0.762	0
Fam172a	0	0.251365	0.963	0.844	0
Nr2f1	0	0.411191	0.643	0.196	0
A830082K12Rik	0	0.690323	0.857	0.345	0
Adgrv1	0	-0.550704	0.119	0.295	0
Mef2c	0	1.62518	0.945	0.618	0
C130071C03Rik	0	0.61782	0.964	0.696	0
Edil3	0	0.747545	0.969	0.536	0
Homer1	0	0.983642	0.915	0.604	0
Arsb	0	0.40937	0.837	0.568	0
Iqgap2	0	0.397103	0.738	0.429	0
Sv2c	0	-1.72624	0.174	0.51	0
Enc1	0	0.450782	0.674	0.228	0
Arhgef28	0	0.360175	0.807	0.595	0
Erbin	0	-0.555095	0.271	0.532	0
Adamts6	0	-0.812516	0.205	0.5	0
Rgs7bp	0	0.413056	0.971	0.783	0
Pde4d	0	-1.24403	0.947	0.969	0
Rab3c	0	-0.887535	0.92	0.924	0
Plk2	0	0.501883	0.667	0.2	0
Ankrd55	0	-0.75983	0.118	0.529	0
Arl15	0	0.433805	0.971	0.848	0
Hcn1	0	1.21361	0.968	0.496	0
4933413L06Rik	0	0.425743	0.599	0.171	0
Kcns3	0	-0.65234	0.05	0.302	0
Smc6	0	-0.377903	0.665	0.698	0
Vsnl1	0	-0.829622	0.938	0.9	0
Rad51ap2	0	0.26605	0.452	0.187	0
Fam49a	0	0.520941	0.871	0.515	0
Greb1	0	-0.25309	0.045	0.204	0
Rock2	0	0.33544	0.96	0.846	0
Hpcal1	0	0.289408	0.683	0.342	0
Asap2	0	-0.495007	0.54	0.662	0
Mboat2	0	0.321073	0.867	0.63	0
Pxdn	0	0.50431	0.695	0.28	0
Acp1	0	0.350193	0.88	0.611	0
Slc26a4	0	0.410515	0.423	0.046	0
Gpr22	0	0.295682	0.536	0.181	0
Dgkb	0	1.10195	0.988	0.92	0
Etv1	0	0.876732	0.672	0.278	0
Dock4	0	0.47644	0.982	0.871	0
Nrcam	0	0.794173	0.991	0.909	0
3110039M20Rik	0	0.283453	0.439	0.065	0
Heatr5a	0	-0.393368	0.349	0.486	0
Gm35188	0	-0.551231	0.772	0.799	0
Arhgap5	0	-0.594524	0.808	0.833	0
Akap6	0	-0.506783	0.985	0.958	0
Npas3	0	0.406993	0.848	0.605	0
Mipol1	0	-0.554807	0.439	0.621	0
Ttc6	0	-1.01169	0.076	0.483	0
4921518K17Rik	0	-0.279421	0.026	0.223	0
Lrfn5	0	0.365387	0.99	0.945	0
Nin	0	0.257821	0.892	0.66	0
Trim9	0	0.661537	0.982	0.867	0
Frmd6	0	0.692512	0.716	0.174	0
Lrrc9	0	-0.265173	0.066	0.234	0
4930447C04Rik	0	-0.670068	0.182	0.535	0
Syt16	0	0.531171	0.969	0.77	0
Dbpht2	0	0.293682	0.478	0.13	0
Gphn	0	-0.288681	0.994	0.98	0
Plekhh1	0	-0.324748	0.034	0.242	0
Actn1	0	0.473154	0.84	0.511	0
Exd2	0	0.32538	0.8	0.487	0
Slc8a3	0	-0.707176	0.647	0.779	0
Sipa1l1	0	0.833481	0.98	0.801	0
Dpf3	0	-0.387047	0.067	0.249	0
Numb	0	0.411593	0.906	0.735	0
Nrxn3	0	-1.2869	0.973	0.965	0
Foxn3	0	-0.470384	0.854	0.855	0
3300002A11Rik	0	-0.777074	0.235	0.43	0
Ttc7b	0	0.435574	0.958	0.777	0
Gm48383	0	0.261424	0.67	0.376	0
Slc24a4	0	0.806564	0.66	0.119	0
Prima1	0	-0.465453	0.026	0.284	0
Bcl11b	0	0.874822	0.793	0.222	0
Evl	0	-0.351307	0.801	0.8	0
Begain	0	-0.459361	0.513	0.587	0
Dlk1	0	-1.2019	0.105	0.492	0
Meg3	0	-0.776923	1	0.995	0
Rtl1	0	-0.358019	0.383	0.499	0
Mirg	0	-0.990169	0.854	0.883	0
Rcor1	0	0.286373	0.787	0.519	0
Pacs2	0	-0.349223	0.383	0.513	0
Rapgef5	0	0.854355	0.955	0.704	0
Tmem196	0	-0.48113	0.341	0.512	0
Plcxd3	0	-0.762324	0.565	0.767	0
2410089E03Rik	0	-0.30143	0.962	0.914	0
Prlr	0	-0.633928	0.042	0.202	0
Npr3	0	0.266519	0.309	0.068	0
Mtmr12	0	0.48194	0.783	0.414	0
Pdzd2	0	0.294011	0.63	0.35	0
Cdh9	0	1.06989	0.749	0.446	0
Cdh18	0	-1.57892	0.903	0.901	0
Retreg1	0	-0.603721	0.448	0.662	0
Ank	0	0.285662	0.911	0.735	0
Fam105a	0	0.331026	0.581	0.22	0
Ctnnd2	0	-0.38793	0.991	0.969	0
Ankrd33b	0	0.968388	0.741	0.083	0
Sdc2	0	-0.921374	0.537	0.638	0
Cpq	0	-1.14846	0.357	0.591	0
Matn2	0	0.655951	0.514	0.132	0
Nipal2	0	-0.515357	0.549	0.671	0
Ywhaz	0	0.396086	0.96	0.777	0
Ncald	0	0.401827	0.932	0.803	0
Rims2	0	-0.340528	0.982	0.954	0
Zfpm2	0	1.18434	0.577	0.303	0
Oxr1	0	1.61071	0.99	0.691	0
Gm26854	0	0.387709	0.502	0.133	0
Angpt1	0	0.614416	0.339	0.123	0
Rspo2	0	0.806762	0.501	0.081	0
Trhr	0	0.333974	0.34	0.119	0
Kcnv1	0	0.318128	0.417	0.05	0
Csmd3	0	0.51431	0.993	0.958	0
Ext1	0	0.678057	0.966	0.85	0
Samd12	0	0.398539	0.986	0.929	0
Mal2	0	0.292621	0.576	0.231	0
Nov	0	0.431845	0.515	0.057	0
Mtss1	0	-0.680228	0.577	0.756	0
Fam49b	0	-0.382341	0.923	0.89	0
Adcy8	0	0.405122	0.796	0.489	0
Efr3a	0	0.440214	0.838	0.622	0
Khdrbs3	0	0.683386	0.958	0.681	0
Ptk2	0	0.320984	0.975	0.892	0
Adgrb1	0	0.366882	0.912	0.594	0
Ly6h	0	0.377216	0.981	0.847	0
Cacng2	0	-0.438384	0.602	0.696	0
Nptxr	0	0.717687	0.798	0.268	0
AC161199.1	0	0.299114	0.637	0.311	0
Tnrc6b	0	-0.337796	0.968	0.933	0
Scube1	0	0.459488	0.43	0.211	0
Mpped1	0	0.451525	0.557	0.244	0
Efcab6	0	0.397753	0.439	0.103	0
Lrrk2	0	0.424706	0.617	0.339	0
Pdzrn4	0	0.250233	0.96	0.833	0
Tmem117	0	-0.963363	0.695	0.831	0
Nell2	0	0.884542	0.979	0.774	0
Slc38a1	0	-0.653327	0.57	0.737	0
Arf3	0	0.281015	0.86	0.586	0
Ddn	0	0.28008	0.486	0.126	0
Kcnh3	0	0.548457	0.615	0.063	0
Scn8a	0	0.506331	0.983	0.834	0
Grasp	0	0.406082	0.482	0.07	0
Ppp1r1a	0	0.274577	0.603	0.29	0
Adcy9	0	0.486329	0.922	0.739	0
Rbfox1	0	1.15195	0.995	0.809	0
Abat	0	-0.427305	0.564	0.631	0
Grin2a	0	0.736095	0.993	0.837	0
Snx29	0	-0.47249	0.799	0.803	0
Mkl2	0	0.598463	0.976	0.822	0
Gm15738	0	0.567305	0.944	0.692	0
Mapk1	0	0.494188	0.951	0.781	0
Smpd4	0	0.503546	0.79	0.438	0
Rtn4r	0	0.49584	0.638	0.127	0
Vwa5b2	0	-0.457467	0.482	0.621	0
Fam131a	0	0.485806	0.849	0.464	0
Chrd	0	0.297021	0.471	0.125	0
Dgkg	0	0.905569	0.896	0.424	0
Lpp	0	-0.625268	0.513	0.622	0
Fgf12	0	0.466634	0.994	0.963	0
Acap2	0	0.697728	0.954	0.693	0
Dlg1	0	0.645638	0.969	0.783	0
Lrch3	0	-0.432911	0.819	0.82	0
Kalrn	0	1.02412	0.995	0.928	0
Sema5b	0	-0.511945	0.078	0.233	0
Stxbp5l	0	0.805056	0.985	0.844	0
Igsf11	0	0.588254	0.604	0.112	0
Gap43	0	-0.604408	0.916	0.878	0
Zbtb20	0	-1.38285	0.794	0.938	0
AC161607.1	0	-0.276971	0.057	0.241	0
Sidt1	0	0.962873	0.91	0.497	0
Boc	0	0.465908	0.446	0.045	0
Phldb2	0	-0.639404	0.051	0.317	0
Plcxd2	0	-0.366256	0.213	0.39	0
Alcam	0	0.651757	0.88	0.658	0
Col8a1	0	-0.385418	0.045	0.216	0
Epha6	0	0.643293	0.985	0.866	0
Htr1f	0	0.756874	0.758	0.476	0
AC129186.1	0	1.86768	0.863	0.125	0
Ncam2	0	1.07026	0.962	0.873	0
App	0	-0.478578	0.989	0.962	0
Cyyr1	0	-0.276339	0.023	0.155	0
Grik1	0	-1.04583	0.257	0.537	0
Tiam1	0	0.711899	0.928	0.73	0
Dscam	0	-1.55783	0.844	0.949	0
Tiam2	0	0.770608	0.754	0.211	0
Zdhhc14	0	0.827519	0.963	0.702	0
Snx9	0	-0.310627	0.259	0.414	0
Tulp4	0	-0.371826	0.9	0.872	0
Gm26848	0	0.842638	0.998	0.969	0
Rps6ka2	0	0.2913	0.772	0.543	0
Fndc1	0	0.332867	0.335	0.154	0
Mas1	0	0.314337	0.426	0.063	0
Srrm2	0	-0.386033	0.99	0.964	0
Baiap3	0	-0.820305	0.098	0.37	0
Rgs11	0	-0.379295	0.382	0.541	0
Syngap1	0	0.265095	0.698	0.393	0
Gm17276	0	-0.555299	0.433	0.624	0
Gm26917	0	-0.607568	0.729	0.791	0
Gm42418	0	-0.548773	1	0.999	0
Rcan2	0	-1.3482	0.489	0.795	0
Runx2	0	0.363174	0.803	0.524	0
Dlk2	0	0.350966	0.632	0.243	0
Lrfn2	0	0.880364	0.93	0.516	0
Satb1	0	-0.643188	0.363	0.526	0
Kat2b	0	-0.443889	0.243	0.478	0
Shd	0	-0.275678	0.122	0.32	0
Cntnap5c	0	0.425839	0.703	0.506	0
Efna5	0	-0.684911	0.573	0.723	0
Ptprm	0	-1.00226	0.255	0.481	0
Dlgap1	0	1.15975	0.998	0.965	0
5031415H12Rik	0	0.639738	0.755	0.184	0
Alk	0	-1.21544	0.201	0.493	0
Lbh	0	-0.349455	0.056	0.297	0
Galnt14	0	0.380971	0.417	0.24	0
Cdc42ep3	0	-0.329591	0.24	0.403	0
Cdkl4	0	0.330396	0.431	0.077	0
Tmem178	0	0.461541	0.681	0.234	0
Plekhh2	0	-0.430645	0.329	0.512	0
Prkce	0	0.71845	0.991	0.913	0
Calm2	0	0.306657	0.987	0.884	0
Jcad	0	0.288283	0.397	0.06	0
Zeb1	0	-0.916729	0.797	0.899	0
Mkx	0	-0.622217	0.154	0.385	0
Mpp7	0	-0.697728	0.192	0.536	0
Zfp521	0	-0.935037	0.045	0.457	0
Chst9	0	0.931212	0.476	0.14	0
Cdh2	0	0.268596	0.969	0.851	0
Dtna	0	-0.510965	0.811	0.851	0
Rit2	0	-0.962445	0.918	0.92	0
Camk4	0	0.950674	0.947	0.704	0
Epb41l4a	0	-0.881207	0.086	0.51	0
Ctnna1	0	-0.7978	0.309	0.542	0
Psd2	0	-0.449948	0.142	0.405	0
Arhgap26	0	-0.479174	0.944	0.915	0
Fgf1	0	-0.468419	0.246	0.467	0
2900055J20Rik	0	0.954467	0.797	0.238	0
Kctd16	0	1.76824	0.951	0.494	0
Ppp2r2b	0	0.52309	0.991	0.949	0
Dpysl3	0	-0.597104	0.482	0.673	0
Mcc	0	-1.73785	0.36	0.664	0
Prr16	0	-1.07504	0.736	0.752	0
Sncaip	0	-1.24106	0.169	0.628	0
Chsy3	0	1.11332	0.855	0.451	0
Synpo	0	0.796619	0.784	0.154	0
Camk2a	0	1.42748	0.995	0.708	0
Slc6a7	0	0.266837	0.696	0.403	0
Ablim3	0	-0.848173	0.271	0.663	0
Htr4	0	0.279952	0.5	0.264	0
Gnal	0	-0.428004	0.665	0.712	0
Prelid3a	0	0.25353	0.823	0.566	0
Tcf4	0	1.25395	0.985	0.769	0
Rab27b	0	-0.469199	0.512	0.615	0
Mapk4	0	0.736627	0.676	0.295	0
Myo5b	0	0.278534	0.426	0.11	0
Ctif	0	-0.451692	0.739	0.77	0
St8sia5	0	0.405693	0.653	0.249	0
Rnf165	0	0.436267	0.862	0.573	0
Setbp1	0	0.280566	0.968	0.873	0
Neto1	0	0.725796	0.882	0.308	0
Rttn	0	-0.340808	0.322	0.461	0
Dok6	0	0.507402	0.984	0.92	0
Sptbn2	0	0.320217	0.805	0.52	0
Rin1	0	0.289137	0.405	0.053	0
Mark2	0	0.284146	0.927	0.756	0
Chrm1	0	0.424405	0.584	0.094	0
Syt7	0	0.455612	0.957	0.716	0
Vps13a	0	0.278449	0.977	0.885	0
Pcsk5	0	0.876859	0.65	0.236	0
Gda	0	1.25242	0.914	0.208	0
Ptar1	0	-0.299523	0.211	0.372	0
Apba1	0	-1.59646	0.939	0.931	0
Smarca2	0	0.384987	0.876	0.678	0
Rfx3	0	1.3842	0.936	0.745	0
Glis3	0	0.295665	0.33	0.09	0
Slc1a1	0	0.343703	0.844	0.534	0
4430402I18Rik	0	0.338102	0.798	0.464	0
Btaf1	0	0.329328	0.896	0.704	0
Exoc6	0	0.325632	0.781	0.473	0
Lgi1	0	0.4029	0.891	0.611	0
Slit1	0	0.331926	0.81	0.504	0
Crtac1	0	0.409941	0.635	0.269	0
Cnnm1	0	0.2885	0.755	0.475	0
Sema4g	0	-0.31328	0.268	0.446	0
Kcnip2	0	0.470399	0.619	0.16	0
Gbf1	0	-0.702843	0.91	0.888	0
Neurl1a	0	0.27287	0.756	0.45	0
Sh3pxd2a	0	0.271556	0.658	0.332	0
Atrnl1	0	1.0197	0.984	0.825	0
Gfra1	0	-1.38596	0.159	0.47	0
Hspa12a	0	0.285695	0.744	0.437	0
Slc18a2	0	-2.06431	0.216	0.658	0
Fbxo3	0	-0.333082	0.508	0.589	0
Gria4	0	-0.310339	0.985	0.956	0
Snrk	0	-0.375642	0.572	0.62	0
Klhdc10	0	-0.333298	0.921	0.877	0
Supt3	0	-0.384631	0.766	0.756	0
Gprin3	0	-0.345128	0.352	0.484	0
Zfyve9	0	-0.340778	0.879	0.838	0
Appl2	0	-0.29615	0.221	0.373	0
Bcat1	0	-0.302595	0.276	0.422	0
Nek1	0	-0.328029	0.821	0.788	0
Kctd1	0	0.365976	0.735	0.573	0
Phf1	0	-0.289016	0.268	0.418	0
Gsk3b	0	-0.31681	0.948	0.907	0
Eml6	0	0.282808	0.981	0.919	0
Rufy3	0	-0.294865	0.936	0.891	0
N4bp2	0	-0.348129	0.263	0.413	0
Gm26624	0	-0.318281	0.261	0.402	0
Tmem178b	0	-0.334996	0.988	0.959	0
Pclo	0	-0.294308	0.984	0.947	0
Depdc5	0	-0.363092	0.703	0.71	0
Coro6	0	-0.351376	0.161	0.311	0
Caprin2	0	-0.279002	0.218	0.368	0
Rp9	0	-0.353739	0.673	0.702	0
Gpc6	0	-0.71608	0.667	0.781	0
Itsn1	0	-0.318	0.875	0.831	0
Gm38304	0	-0.302111	0.248	0.399	0
Fnip2	0	-0.347224	0.533	0.613	0
Tspan2	0	-0.288276	0.095	0.243	0
Dlc1	0	-0.422565	0.607	0.707	0
Vav3	0	-0.955475	0.374	0.49	0
Dzank1	0	-0.348323	0.79	0.775	0
Fam13b	0	-0.338203	0.778	0.769	0
Ampd3	0	-0.251385	0.168	0.319	0
Ccdc85a	0	-0.409401	0.924	0.886	0
Sgcz	0	-0.658168	0.888	0.895	0
Nova1	0	-0.754011	0.496	0.556	0
Map2k4	0	-0.296419	0.946	0.897	0
Gnaq	0	-0.332446	0.975	0.933	0
March4	0	-0.72186	0.688	0.67	0
Pkia	0	-0.370018	0.854	0.825	0
3632451O06Rik	0	-0.350025	0.3	0.434	0
P2rx4	0	-0.271435	0.211	0.36	0
Map3k13	0	-0.341927	0.532	0.605	0
Cldn34c1	0	-0.288091	0.169	0.318	0
Kcnj6	0	-1.07888	0.922	0.821	0
Smc5	0	-0.337262	0.646	0.675	0
Stmn2	0	-0.373633	0.92	0.882	0
Fbxl17	0	-0.262818	0.977	0.941	0
Arhgap18	0	-0.42432	0.57	0.643	0
Clvs2	0	-0.379693	0.759	0.751	0
Impact	0	-0.351925	0.824	0.798	0
A330102I10Rik	0	-0.514535	0.399	0.502	0
Adra1b	0	-0.313648	0.137	0.283	0
Eml2	0	-0.33764	0.717	0.718	0
Tbl1x	0	-0.386373	0.74	0.747	0
Arnt	0	-0.333028	0.803	0.775	0
Arrb1	0	-0.329439	0.45	0.54	0
Cntn2	0	-0.27732	0.178	0.326	0
Arhgap12	0	-0.343931	0.626	0.673	0
Mid2	0	-0.284334	0.3	0.44	0
Manba	0	-0.319208	0.341	0.465	0
Ccdc88a	0	-0.276478	0.954	0.914	0
Itfg2	0	-0.257799	0.209	0.353	0
Wnk1	0	-0.319577	0.911	0.867	0
Unc13c	0	-0.773009	0.334	0.462	0
Mctp2	0	-0.352689	0.134	0.272	0
Hook3	0	-0.310954	0.842	0.808	0
Prickle2	0	0.302141	0.99	0.933	0
Flywch1	0	-0.33796	0.71	0.719	0
Kctd8	0	-0.87349	0.169	0.303	0
Btbd7	0	-0.323199	0.836	0.804	0
Igdcc4	0	-0.30403	0.328	0.454	0
Atp1a3	0	-0.33909	0.948	0.886	0
Zwint	0	-0.345664	0.93	0.891	0
Mthfs	0	-0.383749	0.501	0.572	0
Ago3	0	-0.2887	0.91	0.861	0
Bcan	0	-0.342423	0.082	0.213	0
Ppp2r3a	0	-0.36012	0.804	0.79	0
Carmil3	0	-0.381156	0.499	0.563	0
Thada	0	-0.326268	0.788	0.765	0
Ube2h	0	-0.326587	0.859	0.826	0
Cuedc1	0	-0.356353	0.467	0.549	0
A330008L17Rik	0	-0.847825	0.484	0.554	0
Inpp5a	0	-0.361979	0.519	0.575	0
Kidins220	0	-0.29463	0.965	0.916	0
Disp2	0	-0.322202	0.728	0.731	0
Astn2	0	-0.657928	0.891	0.847	0
Pam	0	-0.33425	0.926	0.916	0
Dner	0	-0.32967	0.853	0.831	0
Naaladl2	0	-0.424296	0.887	0.849	0
Hacd1	0	-0.384771	0.66	0.675	0
Cdh6	0	-0.505878	0.169	0.305	0
Mroh1	0	-0.299905	0.409	0.503	0
Ankrd17	0	-0.261575	0.952	0.906	0
Ubr1	0	-0.320357	0.729	0.731	0
Daam1	0	-0.334368	0.848	0.815	0
Wwp1	0	-0.358349	0.654	0.675	0
Dcc	0	-0.421175	0.94	0.918	0
Cdh11	0	-0.724608	0.816	0.747	0
Fgfr2	0	-0.259389	0.985	0.951	0
Cltb	0	-0.321733	0.626	0.658	0
Plpp4	0	-0.507661	0.118	0.247	0
Sos2	0	-0.337312	0.623	0.657	0
Agk	0	-0.514196	0.669	0.655	0
Snx24	0	-0.397052	0.607	0.631	0
Tcte2	0	-0.437672	0.753	0.721	0
Gad2	0	-0.835545	0.182	0.301	0
Tecr	0	-0.346096	0.856	0.813	0
Cdkl1	0	-0.306661	0.464	0.55	0
Dusp16	0	-0.275483	0.123	0.253	0
Garnl3	0	-0.309708	0.756	0.803	0
Tspan17	0	-0.261027	0.304	0.428	0
Zswim5	0	-0.419736	0.616	0.648	0
Pcgf5	0	-0.361215	0.434	0.533	0
Cacna1b	0	-0.254003	0.966	0.904	0
Fbxl7	0	-0.966095	0.512	0.56	0
Lima1	0	-0.281876	0.202	0.335	0
Dzip3	0	-0.298373	0.865	0.829	0
Cntnap2	0	-0.284532	0.993	0.966	0
Grk5	0	-0.331834	0.439	0.534	0
Lypd6b	0	-0.26429	0.044	0.156	0
Fam214b	0	-0.265529	0.332	0.445	0
Flt3	0	-0.317239	0.245	0.364	0
Sv2a	0	-0.362539	0.752	0.732	0
Pcdh15	0	-0.572649	0.918	0.874	0
Csrnp3	0	-0.285966	0.921	0.881	0
Pik3c2a	0	-0.316655	0.708	0.706	0
Pak3	0	-0.325421	0.956	0.917	0
Cadps2	0	-0.987738	0.789	0.713	0
Cacng4	0	-0.361433	0.235	0.357	0
Atad2b	0	-0.304068	0.838	0.804	0
Traf3	0	-0.330787	0.814	0.764	0
Zbtb7c	0	-0.40809	0.205	0.324	0
Nedd4	0	-0.277641	0.924	0.881	0
Lactb2	0	-0.300857	0.42	0.5	0
Dync2h1	0	-0.32936	0.852	0.811	0
Rmdn1	0	-0.294843	0.825	0.785	0
Gkap1	0	-0.330729	0.674	0.701	0
Gm15614	0	-0.292805	0.369	0.474	0
Plekha5	0	-0.333905	0.979	0.925	0
Xrn1	0	-0.299566	0.843	0.809	0
Rap1gds1	0	-0.344755	0.908	0.85	0
Calb2	0	-0.304864	0.173	0.297	0
Hexb	0	-0.273681	0.236	0.355	0
Unc5c	0	-0.530799	0.979	0.911	0
Zzef1	0	-0.277406	0.833	0.79	0
Gbe1	0	-0.339737	0.27	0.381	0
Mpp6	0	-0.437267	0.611	0.641	0
Parp8	0	-0.300038	0.757	0.816	0
Dgkk	0	-0.268148	0.047	0.15	0
Cep350	0	-0.291675	0.793	0.766	0
4931406P16Rik	0	-0.313431	0.571	0.613	0
Mafg	0	-0.317124	0.606	0.633	0
0610040J01Rik	0	-0.282477	0.129	0.246	0
Eps15	0	-0.333556	0.575	0.609	0
Araf	0	-0.344556	0.729	0.736	0
Gm12353	0	-0.326204	0.545	0.595	0
Mat2a	0	-0.318294	0.756	0.728	0
Ndufs4	0	-0.286568	0.786	0.752	0
Nck1	0	-0.289556	0.448	0.522	0
Chga	0	-0.318139	0.402	0.492	0
Limk1	0	-0.279413	0.32	0.42	0
Nipsnap2	0	-0.30774	0.563	0.604	0
Irs1	0	-0.270459	0.337	0.441	0
Rapgef6	0	-0.27213	0.936	0.879	0
Ccdc50	0	-0.31006	0.625	0.646	0
Bckdhb	0	-0.342554	0.709	0.687	0
Dync1h1	0	-0.274827	0.861	0.804	0
Stk38	0	-0.286296	0.798	0.76	0
Slc9a7	0	-0.308058	0.776	0.752	0
Gm26936	0	-0.340837	0.312	0.412	0
Msantd2	0	-0.294479	0.608	0.631	0
Scml4	0	-0.407446	0.392	0.467	0
Slc25a12	0	-0.264823	0.865	0.817	0
Gm11508	0	-0.260688	0.22	0.334	0
1810034E14Rik	0	-0.250539	0.276	0.389	0
2900011O08Rik	0	-0.291459	0.895	0.836	0
Ispd	0	-0.344035	0.669	0.675	0
Rdx	0	-0.289674	0.381	0.472	0
Sntg1	0	-0.304453	0.984	0.944	0
Ogdh	0	-0.280563	0.826	0.776	0
B830012L14Rik	0	-0.26649	0.428	0.497	0
Prkd1	0	-0.382575	0.21	0.327	0
Anks1	0	-0.28358	0.527	0.584	0
Reck	0	-0.253491	0.317	0.427	0
Prune2	0	-0.354511	0.711	0.696	0
Gls2	0	-0.262954	0.328	0.433	0
Stx3	0	-0.288788	0.596	0.622	0
Tll1	0	-0.792354	0.292	0.388	0
Acaca	0	-0.297863	0.918	0.862	0
Sema5a	0	-0.264081	0.254	0.403	0
Tom1	0	-0.275947	0.329	0.424	0
Zyg11b	0	-0.287547	0.739	0.716	0
Pid1	0	-0.379356	0.85	0.818	0
Kmt2c	0	-0.258324	0.934	0.892	0
Stim1	0	-0.325356	0.69	0.686	0
Clybl	0	-0.448015	0.535	0.565	0
Ccdc28a	0	-0.293434	0.592	0.614	0
Tacr3	0	-0.498327	0.112	0.216	0
Col25a1	0	-1.43679	0.568	0.568	0
Acat1	0	-0.273841	0.785	0.751	0
9530077C05Rik	0	-0.262902	0.332	0.426	0
Fhit	0	-0.380038	0.933	0.872	0
Map4k2	0	-0.280503	0.494	0.549	0
Gm38505	0	-0.435276	0.073	0.175	0
Slc30a9	0	-0.286652	0.646	0.649	0
Usp45	0	-0.281854	0.734	0.714	0
Slc32a1	0	-0.287018	0.079	0.18	0
Rasgrf2	0	-0.382238	0.717	0.709	0
Tbc1d8	0	-0.258945	0.366	0.458	0
Grid1	0	-0.302873	0.975	0.927	0
Sntb1	0	-0.428645	0.166	0.27	0
Frmpd3	0	-0.356065	0.445	0.511	0
Tmtc2	0	-0.732452	0.596	0.591	0
Shisa6	0	-0.598667	0.524	0.613	0
Aldh1a1	0	-0.823924	0.147	0.246	0
Pantr1	0	-0.26579	0.207	0.315	0
Gm21992	0	-0.274462	0.843	0.797	0
Gm4924	0	-0.283252	0.453	0.516	0
Epha10	0	-0.338016	0.666	0.682	0
Epb41l1	0	-0.265949	0.892	0.821	0
Glra2	0	-0.465648	0.21	0.313	0
Slc22a14	0	-0.258607	0.423	0.495	0
Sfxn5	0	-0.352811	0.611	0.613	0
Ptchd1	0	-0.345229	0.324	0.416	0
Cdkl3	0	-0.285627	0.364	0.449	0
Sms	0	-0.285163	0.669	0.673	0
Hnrnpa2b1	0	-0.266321	0.921	0.875	0
Kantr	0	-0.304063	0.63	0.635	0
Acyp2	0	-0.323103	0.837	0.796	0
Syn3	0	-0.351853	0.836	0.804	0
Cwf19l2	0	-0.287488	0.537	0.579	0
Pcca	0	-0.253916	0.898	0.841	0
March8	0	-0.29499	0.546	0.582	0
Sgk1	0	-0.350168	0.547	0.59	0
Akap12	0	-0.252206	0.276	0.382	0
Lnpep	0	-0.292826	0.82	0.768	0
Cers4	0	-0.287996	0.735	0.712	0
Cd81	0	-0.41535	0.493	0.547	0
Crtc3	0	-0.275323	0.733	0.722	0
Usp33	0	-0.262131	0.799	0.761	0
Meis1	0	-0.289613	0.074	0.169	0
Fsd1l	0	-0.278921	0.631	0.641	0
Syt11	0	-0.311641	0.921	0.874	0
Akap7	0	-0.28759	0.549	0.587	0
Arfgef2	0	-0.265708	0.755	0.724	0
Sept4	0	-0.281139	0.198	0.304	0
Cask	0	-0.295084	0.905	0.861	0
Ppp1r14b	0	-0.27215	0.34	0.428	0
Pdzd8	0	-0.313082	0.575	0.583	0
Wipf1	0	-0.252512	0.093	0.193	0
Ankib1	0	-0.258028	0.858	0.811	0
Rb1	0	-0.298215	0.782	0.753	0
Socs6	0	-0.308979	0.4	0.465	0
2610037D02Rik	0	-0.323784	0.729	0.705	0
Ndfip1	0	-0.256117	0.891	0.846	0
Nrsn2	0	-0.280919	0.343	0.426	0
Sept6	0	-0.25558	0.448	0.52	0
Tpr	0	-0.261081	0.848	0.797	0
Cd47	0	-0.323618	0.774	0.725	0
Cacna1g	0	-0.287231	0.429	0.507	0
Phtf2	0	-0.286292	0.699	0.682	0
Tmem163	0	-0.521644	0.428	0.476	0
Tpk1	0	-0.295427	0.443	0.504	0
6330403K07Rik	0	-0.372336	0.601	0.617	0
Gfod2	0	-0.278704	0.522	0.558	0
Zdhhc20	0	-0.300022	0.861	0.815	0
Homer2	0	-0.374376	0.578	0.59	0
Ctps2	0	-0.272393	0.507	0.553	0
Fam169a	0	-0.271624	0.562	0.589	0
Pura	0	-0.261608	0.853	0.803	0
Lims1	0	-0.296916	0.715	0.714	0
Sacs	0	-0.291604	0.58	0.585	0
Ghr	0	-0.984591	0.647	0.62	0
B230217J21Rik	0	-0.273479	0.089	0.178	0
Sez6l	0	-0.322396	0.933	0.84	0
Plekhg1	0	-0.989693	0.104	0.193	0
Apbb2	0	-0.30381	0.949	0.889	0
Sash1	0	-0.406989	0.373	0.447	0
Rab30	0	-0.302407	0.719	0.706	0
Scarb2	0	-0.27384	0.422	0.481	0
Klf12	0	-0.46455	0.868	0.826	0
Ebf2	0	-0.526936	0.033	0.11	0
Rph3a	0	-0.363688	0.493	0.547	0
Caskin1	0	-0.256199	0.542	0.575	0
Cyth1	0	-0.322064	0.732	0.681	0
Rnf220	0	-1.04899	0.529	0.544	0
Otx2os1	0	-0.383932	0.049	0.13	0
Rasa2	0	-0.307323	0.728	0.7	0
Acss2	0	-0.289866	0.621	0.613	0
Zfp704	0	-0.265428	0.822	0.791	0
Zfand6	0	-0.286636	0.49	0.535	0
Zmiz1	0	-0.273415	0.575	0.611	0
Simc1	0	-0.295151	0.563	0.592	0
Xpo1	0	-0.279334	0.712	0.696	0
St3gal4	0	-0.404044	0.285	0.368	0
AY036118	0	-0.305715	0.904	0.86	0
Gab1	0	-0.32828	0.093	0.184	0
BC005561	0	-0.251422	0.827	0.775	0
Neto2	0	-0.310905	0.511	0.588	0
Maml2	0	-0.40039	0.377	0.482	0
St8sia4	0	-0.276982	0.164	0.259	0
Trip11	0	-0.262895	0.73	0.699	0
Htt	0	-0.250493	0.826	0.781	0
Pgr	0	-0.328672	0.461	0.508	0
Orc3	0	-0.253987	0.55	0.578	0
St8sia1	0	-0.275271	0.487	0.526	0
Sh3glb1	0	-0.263968	0.696	0.679	0
Zdbf2	0	-0.284678	0.484	0.555	0
Lhfp	0	-0.670315	0.363	0.422	0
Camk2g	0	-0.282577	0.64	0.656	0
Fut8	0	-0.325027	0.868	0.82	0
Cenpc1	0	-0.254302	0.689	0.679	0
Synrg	0	-0.259412	0.634	0.639	0
Acsl3	0	-0.30928	0.467	0.508	0
Kcnn2	0	-0.363121	0.806	0.77	0
Zfyve16	0	-0.263952	0.494	0.526	0
Atp11c	0	-0.314437	0.516	0.558	0
Nap1l4	0	-0.251351	0.506	0.542	0
Pik3ca	0	-0.253261	0.657	0.648	0
Gas2	0	-0.308637	0.499	0.526	0
Golim4	0	-0.269052	0.193	0.281	0
Glce	0	-0.33212	0.561	0.582	0
Adcy5	0	-0.270268	0.597	0.597	0
Nos1ap	0	-0.574559	0.886	0.767	0
Nrip3	0	-0.296057	0.405	0.457	0
Bsg	0	-0.433797	0.648	0.645	0
Tspan7	0	-0.31886	0.866	0.836	0
Acbd5	0	-0.256061	0.656	0.646	0
Pcbp4	0	-0.271163	0.492	0.532	0
AC165271.1	0	-0.262264	0.256	0.327	0
Fmn1	0	-0.374484	0.722	0.676	0
Dpy19l4	0	-0.252634	0.507	0.538	0
Letm2	0	-0.266775	0.548	0.569	0
Kif13a	0	-0.327104	0.546	0.569	0
Copg2	0	-0.253619	0.815	0.769	0
Erc2	0	-0.760029	0.994	0.966	0
Cst3	0	-0.567102	0.649	0.649	0
Stat3	0	-0.274502	0.362	0.429	0
Mdh1	0	-0.33497	0.89	0.82	0
Slc23a2	0	-0.271592	0.822	0.756	0
Tle4	0	-0.418043	0.558	0.577	0
Gpr176	0	-0.2534	0.323	0.404	0
Lekr1	0	-0.28178	0.63	0.624	0
Snx30	0	-0.280796	0.581	0.586	0
Luzp1	0	-0.298167	0.729	0.697	0
AW554918	0	-0.273186	0.82	0.772	0
Creb5	0	-0.364229	0.048	0.115	0
N4bp2l1	0	-0.303528	0.677	0.666	0
Patj	0	-0.35587	0.595	0.589	0
Etv6	0	-0.265613	0.575	0.594	0
Sgcd	0	-0.857599	0.967	0.88	0
Myo6	0	-0.280315	0.693	0.662	0
Gabbr1	0	-0.252107	0.872	0.813	0
Gpr137c	0	-0.332389	0.645	0.66	0
D030068K23Rik	0	-0.385696	0.314	0.368	0
Slc43a2	0	-0.255114	0.588	0.589	0
Cacna2d3	0	-0.560798	0.956	0.854	0
Ldlrad3	0	-0.252123	0.411	0.47	0
Fam13a	0	-0.293022	0.422	0.467	0
Samd5	0	-0.386928	0.548	0.587	0
Zfp618	0	-0.329108	0.693	0.659	0
Frmd5	0	-0.634927	0.824	0.744	0
Atp1b1	0	-0.35909	0.967	0.912	0
Tenm1	0	-0.287277	0.96	0.915	0
Stmn3	0	-0.279327	0.953	0.886	0
Immp2l	0	-0.35822	0.943	0.861	0
Grin3a	0	-0.437652	0.523	0.557	0
Abcb7	0	-0.259846	0.493	0.519	0
Zfp804a	0	-0.707711	0.721	0.69	0
Pdia5	0	-0.262814	0.195	0.266	0
Tmx4	0	-0.253153	0.836	0.783	0
Htr2c	0	-0.263748	0.641	0.478	0
Trpc6	0	-0.610381	0.512	0.511	0
Usp24	0	-0.25377	0.788	0.735	0
Tac1	0	-0.286374	0.051	0.112	0
Cab39l	0	-0.263719	0.627	0.614	0
Arhgap23	0	-0.315004	0.628	0.619	0
Sgce	0	-0.258101	0.567	0.579	0
Gm45844	0	-0.254441	0.559	0.56	0
Arl6ip1	0	-0.321809	0.639	0.626	0
Cdh13	0	-0.259366	0.738	0.788	0
Pgap1	0	-0.269498	0.668	0.654	0
Nnat	0	0.506433	0.788	0.671	0
Stag2	0	-0.251827	0.662	0.645	0
Lsamp	0	0.416201	0.997	0.99	0
Prkca	0	-0.83453	0.952	0.817	0
Grid2	0	-0.855534	0.964	0.858	0
Vcan	0	-0.335976	0.1	0.161	0
4921534H16Rik	0	-0.324813	0.422	0.442	0
Pvt1	0	-0.261718	0.661	0.642	0
Ptpn4	0	-0.43564	0.889	0.814	0
Slc38a2	0	-0.281507	0.632	0.615	0
Gm45645	0	-0.278414	0.38	0.403	0
Ldhb	0	-0.35278	0.733	0.672	0
Prmt2	0	-0.25014	0.579	0.573	0
Trpm3	0	-0.446812	0.747	0.788	0
Cd200	0	-0.253465	0.483	0.495	0
Ephb1	0	-0.50232	0.341	0.378	0
Gulp1	0	-0.355133	0.218	0.275	0
Pde11a	0	-0.358939	0.203	0.269	0
Scn1a	0	-0.322549	0.927	0.831	0
Syt9	0	-0.346295	0.438	0.461	0
Itm2b	0	-0.328475	0.817	0.762	0
Zfp608	0	-0.280938	0.72	0.701	0
Cdh8	0	-0.560774	0.867	0.788	0
Csmd2	0	-0.305835	0.964	0.839	0
Pde1c	0	-0.445214	0.265	0.309	0
Tcf12	0	-0.324192	0.92	0.857	0
Klhl29	0	-0.281558	0.919	0.848	0
Fstl5	0	-0.613562	0.678	0.643	0
March11	0	-0.356882	0.599	0.559	0
Ptchd4	0	-0.258793	0.398	0.455	0
Mid1	0	-0.336525	0.33	0.361	0
Luzp2	0	-0.307621	0.747	0.764	0
Ccdc171	0	-0.347237	0.536	0.506	0
Ctsb	0	-0.260977	0.469	0.482	0
Pde8a	0	-0.256177	0.108	0.162	0
Plcl1	0	-0.579261	0.778	0.748	0
Gad1	0	-0.497025	0.209	0.251	0
Cep112	0	-0.351141	0.633	0.441	0
Parm1	0	-0.326771	0.41	0.436	0
Nyap2	0	-0.383969	0.927	0.832	0
Pcdh11x	0	-0.88659	0.458	0.458	0
Tcf7l2	0	-0.845768	0.13	0.176	0
Gm12239	0	-0.363375	0.2	0.241	0
Hdac9	0	-0.445935	0.974	0.911	0
Lix1	0	-0.435127	0.562	0.388	0
Stard9	0	-0.28151	0.53	0.506	0
Adamts2	0	-0.312627	0.233	0.276	0
Tox	0	-0.308819	0.451	0.491	0
Nexmif	0	-0.340193	0.866	0.788	0
Plppr1	0	-0.277882	0.674	0.656	0
Sh3d19	0	-0.489026	0.691	0.647	0
Gabrg1	0	-0.450907	0.237	0.266	0
Syt4	0	-0.25759	0.64	0.61	0
Sntg2	0	-0.322256	0.339	0.241	0
Sdk2	0	-0.295412	0.402	0.415	0
Etv5	0	-0.369511	0.519	0.49	0
Ndn	0	-0.254335	0.494	0.489	0
Inpp4b	0	-0.462134	0.839	0.8	0
Cspg5	0	-0.256649	0.658	0.629	0
Lef1	0	-0.707073	0.073	0.105	0
Zfp804b	0	-0.301305	0.557	0.448	0
Robo2	0	-0.366615	0.942	0.853	0
Syt2	0	-0.361592	0.224	0.247	0
Glra3	0	-0.424625	0.538	0.5	0
Gm15155	0	-0.273853	0.442	0.444	0
Cpne4	0	-0.430855	0.898	0.778	0
Sulf1	0	-0.422924	0.218	0.241	0
Il1rapl2	0	-0.734225	0.644	0.616	0
Ptgds	0	-0.520759	0.372	0.291	0
Mast4	0	-0.301102	0.902	0.841	0
Airn	0	-0.302981	0.477	0.452	0
Ckb	0	-0.298174	0.902	0.805	0
Hspa8	0	-0.25837	0.87	0.786	0
Sema3e	0	-0.276579	0.22	0.242	0
Kcnc1	0	-0.299961	0.634	0.539	0
Sema6a	0	-0.263435	0.413	0.419	0
Gm4876	0	-0.292079	0.471	0.45	0
Prkcd	0	-0.47842	0.122	0.137	0
Cdh4	0	-0.293019	0.748	0.685	0
Gabrg3	0	-0.354153	0.713	0.668	0
Kcnd3	0	-0.486916	0.973	0.853	0
Synpo2	0	-0.895913	0.162	0.173	0
Apoe	0	-0.361147	0.35	0.288	0
Dock10	0	-0.406795	0.453	0.46	0
Ptpn5	0	-0.277194	0.891	0.759	0
Trps1	0	0.712117	0.751	0.752	0
Pard3b	0	-0.668228	0.433	0.341	0
Zfp536	0	-0.494901	0.296	0.291	0
Il1rap	0	-0.355559	0.798	0.637	0
Elmo1	0	-0.276838	0.764	0.683	0
Epb41l3	0	-0.407041	0.868	0.677	0
mt-Co1	0	-0.30719	0.701	0.594	0
mt-Co2	0	-0.263115	0.505	0.429	0
Kcnmb2	0	-0.424919	0.356	0.339	1
Rreb1	0	-0.509332	0.702	0.568	1
Adarb1	0	-0.313006	0.827	0.686	1
Sst	0	-0.253661	0.142	0.125	1
mt-Co3	0	-0.289603	0.639	0.554	1
mt-Atp6	0	-0.256205	0.44	0.386	1
Zmat4	0	-0.546791	0.653	0.537	1
Gpc5	0	-0.447251	0.506	0.487	1
Qk	0	-0.541846	0.795	0.683	1
mt-Cytb	0	-0.283367	0.491	0.447	1
Ntng1	0	-0.529486	0.774	0.669	1
Chrm2	0	-0.253748	0.268	0.247	1
Cartpt	0	-0.295491	0.14	0.131	1
Plp1	1	-0.852277	0.336	0.305	1
Mgat4c	1	-0.363486	0.927	0.817	1

## Sheet: c_3
Column1	p_val	avg_log2FC	pct.1	pct.2	p_val_adj
Xkr4	0	-0.411524	0.917	0.978	0
Rgs20	0	-0.385055	0.456	0.637	0
Oprk1	0	-0.339189	0.158	0.34	0
Gm28376	0	-0.425371	0.129	0.402	0
Jph1	0	-0.319267	0.091	0.344	0
Rims1	0	-0.632303	0.919	0.974	0
2010300C02Rik	0	-0.323012	0.284	0.466	0
Npas2	0	-0.43567	0.213	0.435	0
Tmeff2	0	-0.572688	0.813	0.909	0
Raph1	0	-0.265607	0.73	0.857	0
Erbb4	0	-1.08635	0.651	0.726	0
March4	0	-0.706954	0.502	0.706	0
Sgpp2	0	0.470119	0.522	0.346	0
Serpine2	0	-0.437201	0.253	0.45	0
Nyap2	0	-0.557454	0.754	0.865	0
Sphkap	0	-0.408671	0.528	0.735	0
En1	0	-0.560387	0.088	0.374	0
R3hdm1	0	-0.432924	0.876	0.958	0
Syt2	0	0.985554	0.461	0.202	0
Gm26936	0	-0.356403	0.22	0.429	0
Brinp3	0	0.617609	0.806	0.681	0
Colgalt2	0	-0.315889	0.17	0.36	0
Cacna1e	0	-0.635998	0.799	0.901	0
Rasal2	0	-0.332696	0.817	0.927	0
Atp1b1	0	0.642035	0.898	0.925	0
Dcaf6	0	-0.323176	0.712	0.866	0
Ildr2	0	-0.432483	0.388	0.611	0
Lmx1a	0	-0.541514	0.086	0.342	0
Pbx1	0	-1.32069	0.901	0.975	0
Nos1ap	0	-1.07659	0.559	0.829	0
Rgs7	0	-0.425919	0.876	0.963	0
Esrrg	0	0.845299	0.794	0.794	0
Celf2	0	-1.12003	0.943	0.972	0
Cacnb2	0	-0.486788	0.887	0.957	0
Gpr158	0	-0.908445	0.884	0.962	0
Gad2	0	1.01277	0.576	0.226	0
Lmx1b	0	-0.602846	0.084	0.419	0
Zeb2	0	-0.866135	0.187	0.354	0
Lypd6b	0	0.286348	0.293	0.108	0
Nr4a2	0	-0.493873	0.127	0.469	0
Ccdc148	0	-0.256308	0.578	0.763	0
Scn3a	0	-0.423813	0.734	0.87	0
Scn1a	0	0.676104	0.835	0.848	0
Gm13629	0	0.821788	0.696	0.486	0
Scn9a	0	0.462995	0.761	0.675	0
B3galt1	0	-1.18669	0.859	0.97	0
Stk39	0	-0.297718	0.736	0.877	0
Gad1	0	0.751933	0.496	0.197	0
Tlk1	0	-0.295983	0.553	0.747	0
Osbpl6	0	0.671029	0.848	0.799	0
Pde1a	0	-0.811727	0.564	0.804	0
Lrrc4c	0	0.801066	0.925	0.958	0
4930445B16Rik	0	0.416239	0.51	0.33	0
Slc1a2	0	-0.666983	0.448	0.742	0
Pax6	0	0.268245	0.118	0.028	0
Mpped2	0	-0.496009	0.589	0.798	0
Rasgrp1	0	-0.263031	0.197	0.377	0
Frmd5	0	0.667575	0.843	0.741	0
Sema6d	0	-0.924074	0.72	0.832	0
Kcnip3	0	-0.585213	0.197	0.582	0
Plcb1	0	-0.381859	0.806	0.913	0
Pcsk2	0	-0.600862	0.735	0.886	0
Slc24a3	0	-0.619422	0.775	0.919	0
9030622O22Rik	0	-1.10232	0.075	0.387	0
Syndig1	0	0.483157	0.493	0.322	0
Slc32a1	0	0.581044	0.395	0.12	0
Ptprt	0	0.971644	0.639	0.464	0
Tshz2	0	0.736175	0.581	0.291	0
Gm26883	0	0.517231	0.474	0.214	0
Gnas	0	0.464192	0.922	0.958	0
Ntsr1	0	-0.418487	0.075	0.331	0
Pcsk1n	0	0.655232	0.895	0.898	0
Tenm1	0	-0.390727	0.846	0.937	0
Hs6st2	0	0.611559	0.63	0.432	0
Xist	0	-0.374346	0.871	0.964	0
Pbdc1	0	-0.395269	0.357	0.552	0
Pcdh11x	0	0.886987	0.644	0.423	0
Drp2	0	-0.283515	0.355	0.559	0
Ammecr1	0	-0.597715	0.486	0.711	0
Htr2c	0	1.11964	0.672	0.473	0
Cnksr2	0	-0.812739	0.712	0.888	0
Rps6ka3	0	-0.405304	0.618	0.801	0
Nhs	0	0.846364	0.775	0.535	0
Arhgap6	0	-0.555134	0.353	0.609	0
Gm15261	0	-0.332204	0.147	0.35	0
Tpd52	0	-0.285919	0.406	0.633	0
Gm37459	0	-0.356912	0.217	0.422	0
Pex5l	0	-1.24626	0.684	0.844	0
4930419G24Rik	0	-0.637598	0.336	0.572	0
Lhfp	0	-0.744396	0.195	0.454	0
Mme	0	0.269156	0.233	0.053	0
Plch1	0	0.463708	0.363	0.206	0
Gm21949	0	-0.693532	0.172	0.57	0
Pdgfc	0	-0.316679	0.251	0.466	0
Sh3d19	0	-0.532186	0.487	0.685	0
Bcan	0	0.380142	0.389	0.155	0
Kcnn3	0	-0.998436	0.372	0.734	0
Celf3	0	-0.278476	0.577	0.811	0
Syt6	0	0.295847	0.228	0.078	0
Kcnd3	0	-1.22931	0.7	0.905	0
Palmd	0	-0.44811	0.143	0.439	0
Dpyd	0	-0.578646	0.584	0.79	0
6530403H02Rik	0	-0.917042	0.102	0.308	0
Rap1gds1	0	-0.401342	0.751	0.88	0
Unc5c	0	-0.686611	0.822	0.941	0
Bmpr1b	0	-0.354953	0.053	0.241	0
Lmo4	0	-0.370217	0.313	0.564	0
Pigk	0	-0.438363	0.636	0.79	0
St6galnac5	0	-0.776228	0.454	0.709	0
St6galnac3	0	-0.612507	0.597	0.796	0
Lrrc7	0	-0.484606	0.903	0.965	0
Runx1t1	0	0.493795	0.734	0.627	0
Necab1	0	-0.714154	0.328	0.533	0
Mob3b	0	-0.936195	0.065	0.391	0
Unc13b	0	-0.431218	0.47	0.72	0
Gabbr2	0	-0.408556	0.801	0.905	0
Astn2	0	0.54694	0.85	0.855	0
Nfib	0	-0.533598	0.235	0.427	0
Bnc2	0	-1.37426	0.066	0.419	0
Adamtsl1	0	-1.53216	0.307	0.59	0
Raver2	0	-0.386997	0.275	0.484	0
Dab1	0	-0.413825	0.87	0.901	0
Zswim5	0	-0.37363	0.502	0.67	0
Dlgap3	0	-0.298785	0.465	0.693	0
Ptpru	0	-0.614481	0.335	0.569	0
Epb41	0	0.693373	0.728	0.587	0
Camta1	0	0.64069	0.89	0.944	0
Ajap1	0	-0.3038	0.438	0.668	0
Cdk14	0	-0.486491	0.843	0.947	0
Steap2	0	0.254075	0.281	0.12	0
Zfp804b	0	1.78477	0.629	0.434	0
Cacna2d1	0	-0.514681	0.662	0.908	0
Lhfpl3	0	0.604494	0.854	0.816	0
Cnpy1	0	-0.401069	0.089	0.341	0
Kcnip4	0	-0.75213	0.947	0.977	0
Lgi2	0	0.343907	0.374	0.214	0
Arap2	0	-0.5754	0.216	0.593	0
Nwd2	0	-1.15675	0.399	0.699	0
Kctd8	0	1.32985	0.603	0.221	0
Gabra4	0	-0.617132	0.325	0.633	0
Slc10a4	0	-0.27982	0.046	0.279	0
Fryl	0	-0.363559	0.682	0.826	0
C530008M17Rik	0	0.546601	0.782	0.625	0
Sez6l	0	-0.60881	0.679	0.888	0
Grk3	0	-0.442417	0.419	0.687	0
Cabp1	0	0.395091	0.515	0.364	0
Tmem132b	0	-0.571322	0.644	0.858	0
Auts2	0	-0.985966	0.861	0.981	0
Gm42439	0	-0.467536	0.345	0.673	0
Flt3	0	0.418004	0.48	0.319	0
Slc25a13	0	0.325498	0.39	0.186	0
Nxph1	0	0.630797	0.651	0.421	0
Foxp2	0	-0.840637	0.36	0.679	0
Ptprz1	0	-0.796991	0.587	0.775	0
Cadps2	0	-1.41154	0.476	0.773	0
9330158H04Rik	0	0.268946	0.182	0.058	0
Chrm2	0	0.899292	0.47	0.209	0
Tmem178b	0	-0.402934	0.9	0.976	0
Cntnap2	0	0.650917	0.95	0.974	0
Osbpl3	0	-0.535255	0.194	0.463	0
Wipf3	0	-0.280679	0.367	0.578	0
Nap1l5	0	0.508484	0.784	0.725	0
Snca	0	-0.686442	0.54	0.783	0
Grid2	0	1.07749	0.91	0.868	0
Lrrtm4	0	0.450829	0.924	0.871	0
Prickle2	0	-1.01877	0.816	0.966	0
Pdzrn3	0	-0.639702	0.14	0.317	0
Cntn3	0	0.484035	0.734	0.542	0
Cntn6	0	0.682061	0.731	0.61	0
Itpr1	0	-0.259457	0.464	0.678	0
Slc6a1	0	0.464646	0.549	0.333	0
Ret	0	-0.817878	0.223	0.517	0
Ntf3	0	-0.425122	0.027	0.249	0
Etv6	0	-0.349846	0.413	0.625	0
Grin2b	0	-0.684261	0.908	0.966	0
Gucy2c	0	-0.34514	0.033	0.266	0
Lmo3	0	-0.52016	0.291	0.533	0
Plekha5	0	-0.400083	0.843	0.951	0
Prkcg	0	-0.509696	0.438	0.716	0
Atp1a3	0	0.539059	0.87	0.901	0
Zfp536	0	0.301474	0.467	0.259	0
Slc17a7	0	-0.36816	0.141	0.368	0
Kcnc1	0	0.599095	0.691	0.528	0
Gabrg3	0	0.673041	0.764	0.658	0
Ube3a	0	0.418636	0.928	0.974	0
Snrpn	0	0.761455	0.735	0.651	0
Fam189a1	0	-0.537688	0.722	0.86	0
Sv2b	0	-0.478173	0.462	0.631	0
Mir9-3hg	0	-0.323297	0.252	0.427	0
Homer2	0	-0.466754	0.377	0.628	0
Stard5	0	0.309027	0.326	0.125	0
Mical2	0	-0.428524	0.427	0.655	0
Sox6	0	-1.17541	0.122	0.392	0
Plekha7	0	-0.441195	0.519	0.699	0
Syt17	0	-0.632828	0.316	0.609	0
Hs3st4	0	0.46843	0.579	0.393	0
Ebf3	0	-0.639978	0.173	0.358	0
Tcerg1l	0	0.44038	0.392	0.189	0
Th	0	-0.926256	0.138	0.458	0
Map3k5	0	-0.277771	0.406	0.606	0
Arhgap18	0	0.471656	0.7	0.618	0
Nkain2	0	-0.531551	0.95	0.978	0
Sobp	0	-0.279997	0.792	0.909	0
Grik2	0	0.53727	0.92	0.963	0
Fam184a	0	-0.740994	0.668	0.769	0
Ctnna3	0	0.505723	0.845	0.847	0
Lrrtm3	0	0.476482	0.824	0.801	0
Igf1	0	-0.309453	0.098	0.272	0
Ano4	0	0.610323	0.736	0.652	0
Anks1b	0	-0.454364	0.939	0.986	0
Rmst	0	1.02027	0.771	0.445	0
Socs2	0	-0.348042	0.235	0.524	0
Ppfia2	0	-0.307177	0.89	0.964	0
Syt1	0	-0.627482	0.946	0.979	0
Fam155a	0	-0.452872	0.952	0.984	0
Myo16	0	0.660008	0.624	0.491	0
Csmd1	0	-0.851301	0.952	0.983	0
Chrnb3	0	-0.722951	0.047	0.355	0
Chrna6	0	-0.515795	0.045	0.32	0
Sorbs2	0	-0.458603	0.852	0.941	0
Tenm3	0	0.629092	0.79	0.667	0
4930555F03Rik	0	0.814745	0.57	0.314	0
Gm45321	0	0.624921	0.505	0.26	0
Gm45323	0	0.604294	0.513	0.275	0
Gm45341	0	0.420169	0.401	0.202	0
Gm2516	0	0.565594	0.48	0.243	0
C130073E24Rik	0	0.993328	0.697	0.44	0
Wdr17	0	-0.357987	0.601	0.757	0
Spock3	0	0.626303	0.836	0.704	0
Tll1	0	-0.829957	0.196	0.406	0
March1	0	-0.640555	0.759	0.872	0
Psd3	0	-0.4634	0.704	0.891	0
Large1	0	-0.403581	0.873	0.961	0
Cacna1a	0	-0.427369	0.898	0.967	0
Tox3	0	-0.439917	0.411	0.619	0
Cdh11	0	-0.686591	0.636	0.782	0
Pard3	0	0.380953	0.762	0.626	0
Ptprg	0	-0.409856	0.823	0.922	0
Kcnma1	0	-0.48039	0.917	0.975	0
Erc2	0	-1.62764	0.928	0.978	0
Gm45645	0	-0.405106	0.182	0.441	0
Cacna2d3	0	-0.336034	0.775	0.889	0
Msra	0	-0.652577	0.512	0.738	0
Ptk2b	0	-0.392742	0.148	0.374	0
Adra1a	0	0.343923	0.353	0.182	0
Nefm	0	0.692893	0.47	0.308	0
Dgkh	0	-0.375511	0.661	0.828	0
Dach1	0	0.999186	0.476	0.232	0
Lmo7	0	-0.539345	0.159	0.56	0
Clybl	0	-0.423696	0.361	0.598	0
Fgf14	0	0.367907	0.954	0.983	0
Trpc6	0	-0.902706	0.277	0.556	0
Amotl1	0	-0.520386	0.304	0.519	0
Ntm	0	0.921853	0.866	0.855	0
Pknox2	0	-0.368056	0.514	0.704	0
Drd2	0	-0.837812	0.144	0.41	0
Neo1	0	-0.289061	0.698	0.844	0
Glce	0	-0.35182	0.398	0.613	0
Pdcd7	0	0.464082	0.607	0.404	0
Ubap1l	0	0.45814	0.575	0.34	0
Unc13c	0	0.738489	0.567	0.418	0
Rasgrf1	0	0.740049	0.839	0.607	0
Clstn2	0	-0.717438	0.774	0.876	0
Ephb1	0	1.13483	0.66	0.317	0
Slco2a1	0	-0.402763	0.09	0.353	0
Cpne4	0	-0.658202	0.614	0.832	0
Cacna2d2	0	0.648945	0.734	0.556	0
Bsn	0	-0.39487	0.657	0.82	0
Ctdspl	0	-0.484878	0.579	0.769	0
Myrip	0	-0.303709	0.571	0.754	0
Znrf3	0	-0.284975	0.398	0.634	0
Ddc	0	-1.60627	0.272	0.573	0
1700042O10Rik	0	-1.54924	0.192	0.534	0
Bcl11a	0	-0.378493	0.309	0.509	0
5730522E02Rik	0	-0.5091	0.629	0.763	0
Kcnip1	0	1.01953	0.667	0.297	0
Gabra1	0	0.696198	0.615	0.494	0
Sgcd	0	-1.08444	0.8	0.912	0
Glra1	0	0.430588	0.361	0.137	0
Gm12239	0	0.532436	0.383	0.206	0
Epn2	0	-0.310869	0.576	0.75	0
Ntn1	0	-1.33468	0.107	0.509	0
Coro6	0	0.575008	0.488	0.249	0
Nlk	0	-0.329646	0.767	0.889	0
Rhbdl3	0	0.309007	0.413	0.244	0
Myo1d	0	-0.297984	0.375	0.581	0
Asic2	0	1.11506	0.89	0.83	0
Gm11418	0	0.437409	0.473	0.235	0
5530401A14Rik	0	0.297908	0.369	0.187	0
Ypel2	0	-0.409569	0.375	0.651	0
Car10	0	0.600716	0.77	0.591	0
Stac2	0	0.313224	0.297	0.111	0
Prkca	0	-1.55227	0.649	0.875	0
Cep112	0	0.912227	0.58	0.451	0
Adarb2	0	-1.03229	0.6	0.704	0
Ryr2	0	0.39074	0.851	0.691	0
Lyst	0	-0.310959	0.645	0.791	0
A330102I10Rik	0	0.722145	0.656	0.453	0
Mboat1	0	-0.368237	0.022	0.234	0
Rreb1	0	-1.06768	0.25	0.654	0
Cap2	0	-0.310021	0.595	0.758	0
Dapk1	0	-0.267576	0.663	0.84	0
Slc6a3	0	-1.2764	0.105	0.441	0
Mef2c	0	-0.569489	0.53	0.697	0
C130071C03Rik	0	-0.317738	0.535	0.778	0
Msh3	0	-0.324958	0.439	0.617	0
Arsb	0	-0.275456	0.455	0.641	0
Iqgap2	0	-0.537425	0.176	0.536	0
Arhgef28	0	-0.383757	0.407	0.672	0
Pde4d	0	-0.363952	0.919	0.974	0
Ankrd55	0	0.54927	0.654	0.426	0
Rock2	0	-0.250832	0.76	0.884	0
Hdac9	0	-0.856381	0.834	0.937	0
Dock4	0	-0.526892	0.794	0.907	0
Nrcam	0	-0.329518	0.859	0.935	0
Gm33680	0	0.280638	0.258	0.061	0
B230217J21Rik	0	0.755046	0.478	0.104	0
Nova1	0	1.19884	0.776	0.503	0
Npas3	0	1.21314	0.744	0.625	0
Ttc6	0	-0.759553	0.121	0.474	0
Mdga2	0	0.48207	0.93	0.981	0
Trim9	0	-0.391213	0.796	0.903	0
Syt16	0	-0.300029	0.656	0.83	0
Gphn	0	0.298598	0.948	0.989	0
Rgs6	0	-0.769582	0.562	0.7	0
3300002A11Rik	0	-0.410533	0.226	0.432	0
Chga	0	0.482664	0.605	0.454	0
Prima1	0	-0.378387	0.06	0.277	0
Dlk1	0	-0.650727	0.192	0.474	0
Rapgef5	0	-0.525984	0.606	0.77	0
Itgb8	0	-0.284152	0.119	0.334	0
Ghr	0	-0.735209	0.486	0.651	0
Cdh12	0	0.61476	0.666	0.486	0
Cdh18	0	0.653871	0.881	0.905	0
Fbxl7	0	-0.798565	0.368	0.587	0
Ctnnd2	0	-0.40331	0.92	0.983	0
Ankrd33b	0	-0.273209	0.054	0.214	0
Sdc2	0	-0.56407	0.504	0.644	0
Zfpm2	0	0.602608	0.496	0.319	0
Trps1	0	-0.688541	0.602	0.781	0
Ext1	0	-0.399667	0.77	0.887	0
Kcnq3	0	-0.588357	0.814	0.938	0
Fam135b	0	-0.502012	0.787	0.897	0
Ptk2	0	-0.310191	0.797	0.926	0
Cntn1	0	-0.280926	0.9	0.97	0
Nell2	0	-0.569187	0.643	0.838	0
Grin2a	0	-0.752097	0.8	0.874	0
Shisa9	0	-0.488813	0.658	0.866	0
Etv5	0	-0.678939	0.234	0.544	0
Il1rap	0	-0.888476	0.393	0.714	0
Kalrn	0	-0.452153	0.879	0.951	0
Phldb2	0	-0.469695	0.129	0.301	0
Epha6	0	-0.741187	0.8	0.901	0
Cadm2	0	-0.541363	0.945	0.99	0
AC154782.1	0	0.298117	0.375	0.174	0
Robo2	0	-0.618899	0.794	0.881	0
App	0	-0.280983	0.908	0.978	0
Ttc3	0	0.30072	0.942	0.981	0
AC165271.1	0	-0.304601	0.132	0.351	0
Kcnj6	0	-1.51129	0.607	0.881	0
Zdhhc14	0	-0.368972	0.62	0.768	0
Agpat4	0	-0.550857	0.383	0.701	0
Lix1	0	-0.858481	0.175	0.462	0
Gm42418	0	0.669007	0.998	1	0
Ptchd4	0	0.864597	0.647	0.408	0
Runx2	0	-0.369597	0.395	0.602	0
Satb1	0	-0.666569	0.277	0.542	0
Epb41l3	0	0.803865	0.836	0.684	0
Dlgap1	0	-0.471134	0.938	0.976	0
Alk	0	0.691611	0.586	0.419	0
Slc8a1	0	-0.668306	0.859	0.964	0
Prkce	0	-0.303252	0.848	0.94	0
Celf4	0	-0.305356	0.884	0.96	0
Ctnna1	0	-0.511092	0.354	0.533	0
Mcc	0	-1.10029	0.488	0.639	0
Prr16	0	-0.828271	0.659	0.767	0
Htr4	0	0.54422	0.533	0.259	0
Nedd4l	0	-0.251452	0.812	0.921	0
Ldlrad4	0	-0.4368	0.737	0.866	0
Tcf4	0	-0.965874	0.613	0.84	0
Rnf165	0	-0.255754	0.456	0.65	0
Rasgrp2	0	0.254616	0.292	0.104	0
Syt7	0	-0.433503	0.616	0.781	0
Gnaq	0	-0.325617	0.856	0.955	0
Aldh1a1	0	-0.695229	0.096	0.256	0
Trpm3	0	-0.564636	0.648	0.806	0
Apba1	0	-1.08767	0.828	0.952	0
Pip5k1b	0	-0.324811	0.601	0.767	0
Lgi1	0	-0.355438	0.464	0.692	0
Gbf1	0	-0.455553	0.787	0.911	0
Slc18a2	0	-1.2978	0.318	0.637	0
Maml3	0	-0.453461	0.545	0.698	0
Klhl1	0	-1.39748	0.614	0.631	0
Cntnap4	0	-0.724849	0.678	0.745	0
Camk2d	0	-0.282037	0.818	0.899	0
Tmcc3	0	-0.558006	0.452	0.616	0
Kcns3	0	-0.443343	0.128	0.287	0
Lrrc3b	0	-0.601923	0.53	0.65	0
Agk	0	-0.383145	0.531	0.681	0
Sparcl1	0	0.445627	0.494	0.367	0
Stambpl1	0	0.263283	0.486	0.329	0
Pde10a	0	-0.316872	0.851	0.935	0
Onecut2	0	0.362419	0.284	0.153	0
Syn3	0	0.40707	0.811	0.809	0
Sv2c	0	-1.02198	0.352	0.475	0
Gm26905	0	-0.585507	0.612	0.708	0
Ptprm	0	0.35878	0.592	0.416	0
Prkg1	0	-0.317794	0.805	0.933	0
Fgf13	0	-0.274319	0.617	0.795	0
Qk	0	-0.65697	0.588	0.723	0
Hs3st5	0	0.399345	0.676	0.573	0
Galntl6	0	-0.834254	0.885	0.909	0
Gab2	0	-0.384542	0.71	0.831	0
Sorbs2os	0	-0.342785	0.615	0.752	0
Caln1	0	-0.417831	0.723	0.796	0
Nin	0	-0.315098	0.583	0.719	0
Xkr6	0	0.341092	0.856	0.767	0
Tmem108	0	-0.265523	0.74	0.882	0
Fam13a	0	0.415098	0.554	0.442	0
Nexmif	0	-0.33614	0.69	0.822	0
Mtus2	0	0.462437	0.736	0.706	0
Scml4	0	-0.251559	0.3	0.485	0
Grip2	0	-0.568635	0.415	0.51	0
Tbc1d4	0	0.314964	0.427	0.286	0
Mast3	0	-0.253224	0.206	0.377	0
Dscaml1	0	-0.471139	0.31	0.48	0
Magi1	0	-0.340087	0.901	0.965	0
Nat8l	0	0.365593	0.435	0.3	0
Rasa2	0	-0.256871	0.579	0.729	0
Fndc5	0	0.272286	0.365	0.225	0
Lin28b	0	0.406886	0.704	0.637	0
Pvalb	0	0.274026	0.213	0.101	0
Gpm6b	0	-0.473715	0.616	0.716	0
Satb2	0	-0.413635	0.05	0.181	0
Fmn1	0	-0.338119	0.572	0.704	0
Lgi3	0	0.259757	0.394	0.254	0
Gria4	0	0.269976	0.915	0.969	0
Elmo1	0	0.408129	0.737	0.689	0
Rbms3	0	-0.515273	0.778	0.837	0
Gm17276	0	0.331313	0.673	0.578	0
Vamp1	0	0.344337	0.433	0.31	0
C1ql3	0	-0.296688	0.168	0.326	0
Nnat	0	-0.449161	0.555	0.716	0
Lingo2	0	0.382873	0.919	0.928	0
Prkg2	0	-0.250295	0.191	0.346	0
Limk1	0	0.302996	0.501	0.385	0
Tecr	0	0.423423	0.802	0.824	0
Cpq	0	-0.556258	0.434	0.576	0
Osbpl9	0	0.320589	0.85	0.893	0
Hecw2	0	-0.267825	0.829	0.92	0
Cacna1c	0	-0.383056	0.881	0.956	0
Unc5d	0	0.591124	0.723	0.61	0
Vstm2l	0	0.336284	0.398	0.269	0
9530059O14Rik	0	-0.46416	0.767	0.825	0
Ndnf	0	-0.319797	0.055	0.18	0
Thsd7b	0	0.463078	0.631	0.487	0
Bach2	0	-0.304206	0.676	0.797	0
Cdk19	0	-0.292346	0.282	0.454	0
Pappa	0	-0.378356	0.125	0.267	0
Cttnbp2	0	-0.387751	0.807	0.893	0
Vwc2	0	0.339947	0.475	0.322	0
Abat	0	0.367142	0.671	0.61	0
Gsg1l	0	-0.301921	0.273	0.424	0
Opcml	0	0.515747	0.909	0.945	0
Cpne8	0	-0.279705	0.342	0.519	0
Homer1	0	-0.290387	0.54	0.676	0
Il1rapl2	0	-0.864273	0.505	0.642	0
2410089E03Rik	0	0.272518	0.863	0.933	0
Tenm2	0	0.402446	0.932	0.94	0
Stxbp6	0	0.433606	0.414	0.274	0
Zfp697	0	-0.296358	0.478	0.621	0
Arhgap26	0	0.369391	0.869	0.93	0
Sorcs1	0	0.683241	0.669	0.57	0
Ppp1r14c	0	0.280343	0.505	0.367	0
Pld5	0	0.413571	0.547	0.387	0
Sfmbt2	0	0.287986	0.384	0.252	0
Tango2	0	0.361641	0.738	0.739	0
Col11a1	0	0.256825	0.409	0.259	0
Nefl	0	0.543587	0.517	0.412	0
Pbx3	0	-0.786755	0.646	0.708	0
Kcna1	0	0.467425	0.444	0.339	0
Slc7a14	0	0.308224	0.668	0.512	0
Cntnap5b	0	0.562026	0.726	0.681	0
Slc12a5	0	0.367712	0.773	0.768	0
Cacng3	0	-0.30085	0.457	0.601	0
Atp1b3	0	0.358321	0.6	0.539	0
Kcnt1	0	0.335137	0.631	0.567	0
Pde8b	0	0.302017	0.746	0.628	0
Col16a1	0	0.305024	0.316	0.201	0
Patj	0	0.334177	0.652	0.578	0
Slit3	0	-0.884762	0.493	0.567	0
Grik3	0	-0.316661	0.487	0.638	0
Eml1	0	-0.275012	0.378	0.532	0
Inpp5f	0	0.28193	0.621	0.53	0
Pou6f2	0	1.16517	0.402	0.3	0
Gm20754	0	-0.510989	0.374	0.522	0
Gria3	0	-0.317032	0.817	0.898	0
Mlip	0	-0.35549	0.194	0.333	0
Gm48893	0	0.265325	0.468	0.339	0
Thy1	0	0.469512	0.589	0.492	0
Gm31508	0	0.302313	0.429	0.32	0
Bend6	0	0.374012	0.764	0.782	0
Trpc7	0	0.285626	0.262	0.152	0
Klf12	0	0.332261	0.823	0.835	0
Mgat4c	0	0.508511	0.825	0.837	0
B230334C09Rik	0	-0.255065	0.489	0.627	0
Luzp1	0	0.399513	0.708	0.701	0
Ankrd24	0	0.320039	0.67	0.598	0
Lynx1	0	0.301797	0.46	0.339	0
Tmem164	0	-0.252383	0.482	0.615	0
Nell1	0	0.436201	0.638	0.524	0
Cntnap1	0	0.303818	0.512	0.411	0
Htr7	0	0.282068	0.376	0.249	0
Aldoc	0	0.437175	0.47	0.361	0
Hcrtr2	0	0.276787	0.288	0.165	0
Nrxn3	0	-0.466308	0.954	0.969	0
Faim2	0	0.438095	0.656	0.602	0
Fam19a1	0	-1.07363	0.553	0.641	0
Glp2r	0	-0.259864	0.379	0.509	0
St8sia1	0	0.345294	0.578	0.509	0
Xylt1	0	-0.380258	0.583	0.717	0
Stmn3	0	0.461305	0.867	0.903	0
Ubr4	0	-0.283106	0.543	0.667	0
4930509J09Rik	0	-0.286496	0.204	0.349	0
Baz2b	0	0.307538	0.811	0.863	0
Ptprj	0	-0.332229	0.721	0.828	0
Slc35f3	0	0.279769	0.529	0.4	0
Dcc	0	-0.386988	0.904	0.925	0
Nsg1	0	0.43169	0.609	0.536	0
Rarb	0	0.442921	0.379	0.268	0
Galnt13	0	0.422064	0.85	0.913	0
Kcna2	0	0.342855	0.474	0.383	0
Amy1	0	0.31513	0.724	0.715	0
Csmd2	0	-0.291856	0.808	0.869	0
Slc25a3	0	0.433441	0.755	0.783	0
Lsamp	0	-0.287876	0.98	0.993	0
Sgcz	0	0.445588	0.899	0.893	0
Sntg1	0	0.266314	0.898	0.96	0
Cox5a	0	0.531998	0.684	0.651	0
Kcnd2	0	0.462414	0.895	0.921	0
Scg5	0	0.399875	0.845	0.877	0
Lpp	0	0.333386	0.67	0.592	0
Elmod1	0	0.35962	0.765	0.772	0
Gpc5	0	1.14828	0.541	0.481	0
Cdh20	0	-0.485226	0.341	0.472	0
Tmem255a	0	-0.300522	0.38	0.499	0
Kcnn2	0	0.342164	0.782	0.775	0
3110021N24Rik	0	0.297977	0.695	0.673	0
Gab1	0	-0.271976	0.075	0.187	0
Zfhx3	0	-0.589646	0.717	0.753	0
Wwox	0	0.370702	0.837	0.9	0
Ehbp1	0	-0.330031	0.846	0.939	0
Xpr1	0	0.347401	0.748	0.75	0
Gm48091	0	0.410211	0.638	0.572	0
Sv2a	0	0.408813	0.733	0.735	0
Arhgap24	0	0.392737	0.566	0.461	0
Olfm3	0	0.365895	0.687	0.565	0
Plekhg1	0	-0.869018	0.09	0.196	0
Atp2b2	0	0.3103	0.852	0.896	0
Dlgap2	0	-0.515951	0.819	0.805	0
Pcgf5	0	0.283985	0.596	0.502	0
Kcnh7	0	0.41086	0.776	0.658	0
Epha4	0	-0.361663	0.493	0.586	0
Tacr3	0	-0.401188	0.106	0.216	0
Aff2	0	0.375884	0.741	0.729	0
Scn1b	0	0.376034	0.523	0.432	0
Pnkd	0	0.33261	0.615	0.573	0
Cntn5	0	0.581499	0.816	0.758	0
Slc25a4	0	0.536132	0.758	0.772	0
Shc3	0	-0.27278	0.532	0.659	0
Ptpn4	0	-0.350643	0.733	0.844	0
Ctnna2	0	0.279769	0.929	0.984	0
Cdh13	0	-0.321746	0.701	0.795	0
Cfap46	0	0.369532	0.544	0.458	0
Tspan7	0	0.300577	0.817	0.845	0
Col25a1	0	-0.660416	0.454	0.59	0
Kitl	0	-0.274653	0.145	0.263	0
Chst9	0	-0.261283	0.101	0.212	0
Atp8a2	0	0.351155	0.832	0.899	0
Clmn	0	-0.337037	0.283	0.408	0
Fras1	0	-0.398911	0.366	0.48	0
Clgn	0	-0.265214	0.348	0.465	0
Gabrb2	0	0.46051	0.759	0.751	0
Snph	0	0.348987	0.743	0.785	0
Ckb	0	0.541736	0.803	0.824	0
Gm40841	0	0.341927	0.679	0.671	0
Vwa5b2	0	0.297396	0.64	0.59	0
Kcnab1	0	-0.453404	0.506	0.6	0
Samd5	0	0.354458	0.653	0.567	0
Kif26b	0	0.319766	0.726	0.676	0
Adcy8	0	0.258594	0.643	0.519	0
A330015K06Rik	0	-0.323622	0.312	0.426	0
Tmem130	0	0.364558	0.742	0.726	0
Immp2l	0	-0.260799	0.792	0.89	0
Camk2a	0	-0.342727	0.716	0.762	0
Ctsb	0	0.346401	0.546	0.468	0
Bsg	0	0.359693	0.678	0.64	0
Cdh8	0	-0.501279	0.736	0.813	0
Resp18	0	0.365411	0.677	0.614	0
Stard9	0	0.318802	0.553	0.502	0
Mdh1	0	0.488668	0.805	0.837	0
Sst	0	0.43572	0.196	0.115	0
Podxl2	0	0.301493	0.675	0.619	0
Plcb4	0	-0.519717	0.753	0.732	0
Chd3os	0	0.340185	0.48	0.396	0
Rgs17	0	0.303018	0.783	0.801	0
Tial1	0	0.272388	0.781	0.816	0
Plcxd3	0	-0.292034	0.675	0.746	0
Gas6	0	0.263307	0.488	0.412	0
Carmil1	0	0.282409	0.713	0.697	0
Calm1	0	0.475199	0.895	0.904	0
Ntng1	0	-0.673602	0.601	0.702	0
Chsy3	0	0.283477	0.612	0.498	0
Gm29514	0	0.250697	0.409	0.313	0
Tmem117	0	-0.301987	0.746	0.821	0
Camk2g	0	0.273356	0.676	0.649	0
Ubb	0	0.514825	0.902	0.928	0
Kcnc3	0	0.392495	0.537	0.495	0
Utrn	0	0.258308	0.44	0.33	0
Grin1	0	0.269022	0.844	0.872	0
Sdk1	0	-0.362356	0.663	0.742	0
Frmd4b	0	-0.590486	0.592	0.651	0
Trhde	0	0.493062	0.409	0.315	0
AC129186.1	0	-0.765502	0.172	0.258	0
Aifm3	0	0.286744	0.494	0.419	0
Adam23	0	0.316801	0.818	0.881	0
Hspa8	0	0.545444	0.783	0.803	0
Fut9	0	0.290312	0.759	0.753	0
Clstn3	0	0.321575	0.709	0.711	0
Kcnmb2	0	0.552536	0.409	0.329	0
Ckmt1	0	0.32009	0.482	0.412	0
Psap	0	0.37861	0.737	0.742	0
Tmem59l	0	0.327963	0.527	0.451	0
Gabrg2	0	0.343377	0.709	0.704	0
Tle4	0	0.308651	0.616	0.566	0
E130307A14Rik	0	0.284357	0.759	0.776	0
Ldhb	0	0.472202	0.685	0.681	0
Gas2	0	0.256488	0.575	0.511	0
Asap1	0	0.266293	0.79	0.815	0
Ppib	0	0.311032	0.626	0.616	0
Tspan5	0	-0.266933	0.671	0.752	0
Gm15155	0	0.303374	0.511	0.431	0
Cox7b	0	0.395763	0.653	0.641	0
Ndst4	0	0.352791	0.424	0.332	0
Shisa6	0	-0.363008	0.533	0.611	0
Zfp804a	0	0.355936	0.72	0.69	0
Susd4	0	0.27604	0.719	0.718	0
Iscu	0	0.31628	0.494	0.427	0
Gm10684	0	0.337148	0.5	0.431	0
Got1	0	0.376245	0.558	0.514	0
Rtl4	0	0.411815	0.626	0.556	0
Zfp385b	0	0.295246	0.676	0.616	0
Naaladl2	0	0.315441	0.807	0.864	0
Haghl	0	0.296623	0.579	0.542	0
Elavl4	0	-0.255663	0.773	0.854	0
Chchd10	0	0.441953	0.565	0.519	0
Gpr137c	0	0.258317	0.686	0.653	0
Atp5g3	0	0.45872	0.614	0.585	0
Ppargc1a	0	0.319669	0.547	0.49	0
Cep70	0	0.257288	0.632	0.614	0
Gm38393	0	0.263246	0.717	0.742	0
Fth1	0	0.545136	0.807	0.823	0
Negr1	0	-0.318718	0.916	0.963	0
Synpo2	0	-0.845122	0.106	0.183	0
Camk2n2	0	0.295857	0.451	0.377	0
Hspa4l	0	0.292341	0.695	0.716	0
Ndn	0	0.407348	0.533	0.482	0
Ndrg4	0	0.326323	0.864	0.893	0
Clstn1	0	0.32013	0.745	0.758	0
Vgf	0	0.387949	0.371	0.297	0
Gm32828	0	0.312842	0.163	0.101	0
Gm3764	0	-0.261749	0.202	0.295	0
Pkm	0	0.461958	0.732	0.75	0
Kifc2	0	0.267525	0.685	0.69	0
Cep83	0	0.310804	0.58	0.577	0
Slc22a17	0	0.302029	0.78	0.807	0
Map1a	0	0.352119	0.544	0.512	0
Phlpp1	0	-0.261633	0.717	0.82	0
Prdx5	0	0.378774	0.538	0.492	0
Egfem1	0	0.418061	0.668	0.605	0
Vwc2l	0	-0.532999	0.565	0.617	0
Focad	0	0.262413	0.801	0.857	0
Kcnh8	0	0.358423	0.165	0.103	0
Ralgapa2	0	0.251645	0.812	0.876	0
Gpc6	0	-0.455166	0.74	0.767	0
Nkain3	0	0.427576	0.744	0.729	0
Ndufa4	0	0.490062	0.669	0.656	0
Adgrv1	0	-0.270574	0.198	0.279	0
Rab30	0	0.253846	0.692	0.711	0
Cox8a	0	0.473693	0.75	0.759	0
Rnf157	0	0.253832	0.749	0.792	0
Fkbp3	0	0.358995	0.607	0.582	0
Eno2	0	0.313564	0.718	0.739	0
Bckdhb	0	0.285238	0.672	0.695	0
Zcchc18	0	0.255891	0.849	0.898	0
Idh3b	0	0.256507	0.633	0.638	0
Atp5b	0	0.396285	0.684	0.691	0
Ttll5	0	0.265522	0.696	0.728	0
Ddx24	0	0.265216	0.758	0.789	0
Prkcd	0	-0.388341	0.083	0.145	0
AY036118	0	0.366164	0.833	0.874	0
Chrm3	0	0.416993	0.595	0.534	0
Calm2	0	0.350222	0.882	0.904	0
Ndufb5	0	0.300607	0.456	0.403	0
Fstl5	0	0.322047	0.671	0.645	0
Meis2	0	0.962469	0.281	0.231	0
Hspa5	0	0.294531	0.461	0.403	0
Htr1f	0	0.3028	0.548	0.516	0
Ndst3	0	-0.408044	0.54	0.596	0
Parm1	0	0.369759	0.469	0.425	0
Tanc1	0	-0.311904	0.301	0.363	0
Atp5j	0	0.369925	0.55	0.518	0
Mpc1	0	0.256766	0.713	0.744	0
Slc35f4	0	0.304538	0.686	0.659	0
Atp5f1	0	0.33933	0.641	0.64	0
Gulp1	0	0.433399	0.312	0.258	0
Rtl8a	0	0.268092	0.427	0.371	0
Sncb	0	0.391914	0.671	0.682	0
Sncaip	0	-0.316045	0.532	0.558	0
Tspyl4	0	0.330281	0.625	0.624	0
Nceh1	0	0.254265	0.567	0.552	0
Atp5a1	0	0.32643	0.679	0.698	0
Atp5g1	0	0.397673	0.617	0.61	0
Cox7c	0	0.365536	0.636	0.632	0
Lef1	0	-0.648634	0.06	0.107	0
Pcdh9	0	0.302031	0.938	0.964	0
Itm2b	0	0.345076	0.751	0.775	0
Hsp90ab1	0	0.443884	0.802	0.839	0
Slc25a5	0	0.290028	0.409	0.363	0
Cox7a2	0	0.397091	0.539	0.511	0
mt-Co1	0	0.78004	0.618	0.61	0
Kcnt2	0	-0.269569	0.459	0.513	0
Ndufa6	0	0.302133	0.491	0.455	0
Tpi1	0	0.391656	0.575	0.562	0
Adamts6	0	-0.250514	0.41	0.46	0
Mdh2	0	0.318858	0.569	0.554	0
Cend1	0	0.267495	0.414	0.372	0
Oprm1	0	0.277406	0.432	0.389	0
Cox6c	0	0.352604	0.557	0.537	0
Atp5j2	0	0.29111	0.533	0.505	0
Uqcrb	0	0.27448	0.421	0.375	0
Cox6b1	0	0.345509	0.563	0.55	0
Rab3a	0	0.374482	0.582	0.576	0
Ndufc2	0	0.337129	0.514	0.486	0
Tuba1b	0	0.341527	0.496	0.468	0
Aldoa	0	0.432007	0.788	0.811	0
Ndufa11	0	0.31959	0.448	0.411	0
Creb5	0	-0.264871	0.069	0.111	0
Zfhx4	0	0.300152	0.593	0.582	0
Slc4a4	0	-0.257425	0.236	0.294	0
Rabac1	0	0.269407	0.473	0.439	0
Gpx4	0	0.304745	0.456	0.42	0
Syp	0	0.324422	0.766	0.8	0
Atp5c1	0	0.25121	0.586	0.595	0
Ptpn3	0	-0.371714	0.368	0.41	0
Atp5l	0	0.306998	0.562	0.559	0
Gm38505	0	0.27254	0.192	0.152	0
Ndufb9	0	0.304545	0.39	0.351	0
Arl6ip1	0	0.331998	0.628	0.629	0
Ndufs7	0	0.268229	0.434	0.401	0
Cmss1	0	0.441713	0.845	0.879	0
Adgrl2	0	0.279833	0.639	0.64	0
Gm28928	0	-0.608286	0.373	0.294	0
Cox5b	0	0.252317	0.38	0.341	0
mt-Co3	0	0.742897	0.573	0.567	0
Sec62	0	0.25858	0.679	0.708	0
Uqcrh	0	0.304463	0.534	0.515	0
Hint1	0	0.35439	0.616	0.619	0
Actb	0	0.391547	0.839	0.862	0
Nrg1	0	0.250689	0.911	0.927	0
mt-Co2	0	0.637114	0.462	0.437	0
Cntnap5a	0	0.255483	0.833	0.86	0
Mpc2	0	0.269283	0.531	0.52	0
Ndufb10	0	0.259056	0.432	0.405	0
Dynll2	0	0.304198	0.523	0.514	0
Gfra1	0	-0.326402	0.384	0.427	0
Gm11808	0	0.358322	0.523	0.505	0
Scg2	0	0.26364	0.652	0.627	0
Pgam1	0	0.340228	0.565	0.566	0
H2afz	0	0.255618	0.485	0.462	0
Selenom	0	0.26674	0.514	0.496	0
Hsp90aa1	0	0.346511	0.558	0.556	0
mt-Atp6	0	0.636307	0.417	0.39	0
Tubb4b	0	0.317635	0.473	0.457	0
Ralyl	0	0.350952	0.908	0.966	0
Pnmal2	0	0.282289	0.506	0.494	0
Ywhag	0	0.267174	0.803	0.863	0
mt-Nd1	0	0.473382	0.316	0.281	0
mt-Nd4	0	0.529117	0.368	0.338	0
mt-Cytb	0	0.621195	0.469	0.451	0
Mif	0	0.324551	0.514	0.503	0
Vav3	0	-0.540596	0.437	0.478	0
Atp5h	0	0.285773	0.479	0.461	0
Uqcrq	0	0.313456	0.53	0.52	0
Ppia	0	0.366895	0.754	0.787	0
Tspan3	0	0.252982	0.574	0.578	0
Mt3	0	0.40452	0.625	0.636	0
Phactr1	0	-0.361382	0.866	0.871	0
Rfx3	0	-0.256158	0.731	0.784	0
Rpl9-ps6	0	0.364255	0.586	0.588	0
Cox6a1	0	0.286935	0.495	0.486	0
Gabarapl2	0	0.25269	0.535	0.526	0
Prdx2	0	0.266606	0.53	0.524	0
mt-Nd2	0	0.314542	0.226	0.195	0
Ubc	0	0.284081	0.47	0.46	0
Atpif1	0	0.267457	0.732	0.77	0
Vdac1	0	0.25769	0.659	0.691	0
Uqcr10	0	0.27837	0.395	0.375	0
Rpl19	0	0.336368	0.583	0.596	0
Atp6v1f	0	0.25186	0.436	0.422	0
Tuba4a	0	0.263986	0.395	0.377	0
Rps29	0	0.306463	0.449	0.435	0
Atp6v1e1	0	0.274291	0.579	0.594	0
Tpt1	0	0.307424	0.499	0.5	0
Slc17a6	0	0.256477	0.321	0.306	0
2900097C17Rik	0	0.331261	0.632	0.66	0
Pard3b	0	-0.359135	0.331	0.36	0
Serinc1	0	0.301712	0.622	0.651	0
Fau	0	0.324024	0.566	0.581	0
6330403K07Rik	0	0.290338	0.591	0.619	0
Eef1a2	0	0.266351	0.556	0.572	0
Rplp1	0	0.252064	0.337	0.32	0
Rpsa	0	0.25369	0.468	0.464	0
Aes	0	0.258696	0.613	0.643	0
Rpl8	0	0.272374	0.511	0.518	0
Rps24	0	0.317436	0.522	0.531	0
Ncdn	0	0.290835	0.564	0.581	0
Gm30382	0	0.338817	0.464	0.479	0
Tubb5	0	0.290491	0.499	0.509	0
Rps27a	0	0.254076	0.488	0.492	0
Ttr	0	1.05907	0.385	0.378	0
Atp5d	0	0.29274	0.557	0.576	0
Rps8	0	0.325285	0.615	0.647	0
1700030F04Rik	0	0.279313	0.559	0.584	0
Wdr89	0	0.260813	0.517	0.532	0
Rpl21	0	0.287593	0.518	0.538	0
Calm3	0	0.281347	0.568	0.597	0
Cfl1	0	0.26407	0.555	0.579	1
Lars2	0	0.263772	0.65	0.692	1
Bex2	0	0.273894	0.665	0.711	1
Arpp21	0	-0.297552	0.682	0.609	1
Plp1	0	-0.386391	0.311	0.309	1
Cst3	0	0.257443	0.614	0.655	1
Kirrel3	0	0.272204	0.777	0.83	1
Tubb2a	0	0.300598	0.676	0.731	1
Ywhab	0	0.254915	0.612	0.66	1
Ywhah	0	0.255765	0.66	0.708	1
Kcnq5	1	-0.256056	0.693	0.688	1
Tmsb4x	1	0.301007	0.522	0.549	1

## Sheet: c_4
Column1	p_val	avg_log2FC	pct.1	pct.2	p_val_adj
Rgs20	0	0.472528	0.774	0.584	0
Oprk1	0	1.02565	0.724	0.249	0
Sgk3	0	-0.326577	0.079	0.322	0
Prex2	0	-0.408987	0.1	0.308	0
Eya1	0	0.345372	0.19	0.06	0
Kcnb2	0	0.337236	0.978	0.903	0
Col19a1	0	-0.386016	0.028	0.193	0
Khdrbs2	0	1.04889	0.964	0.818	0
2010300C02Rik	0	-0.552512	0.224	0.469	0
Npas2	0	-0.578447	0.167	0.435	0
Dnah7a	0	0.458381	0.556	0.366	0
Satb2	0	-0.516791	0.024	0.18	0
Erbb4	0	1.39452	0.95	0.679	0
March4	0	1.10983	0.876	0.643	0
Resp18	0	0.583246	0.785	0.6	0
Epha4	0	-0.821447	0.317	0.609	0
Scg2	0	0.577907	0.811	0.604	0
Nyap2	0	0.534159	0.92	0.836	0
Sphkap	0	0.716479	0.852	0.679	0
Agap1	0	0.302286	0.948	0.896	0
En1	0	0.737659	0.737	0.268	0
2610027F03Rik	0	0.300404	0.266	0.076	0
Gm28928	0	-1.90425	0.136	0.332	0
R3hdm1	0	-0.497055	0.952	0.944	0
Thsd7b	0	0.780236	0.687	0.483	0
Srgap2	0	0.34443	0.938	0.87	0
Nav1	0	0.359463	0.927	0.874	0
Brinp3	0	-0.850592	0.538	0.725	0
Rasal2	0	0.394809	0.961	0.902	0
Lmx1a	0	0.723918	0.667	0.247	0
Pbx1	0	0.958045	0.999	0.958	0
Kcnj9	0	-0.26268	0.066	0.304	0
Smyd3	0	0.41058	0.97	0.905	0
Cnih3	0	-0.433752	0.075	0.303	0
C1ql3	0	-0.690744	0.088	0.333	0
Plxdc2	0	-1.43259	0.225	0.61	0
Nebl	0	-0.839291	0.633	0.829	0
Gpr158	0	0.393667	0.992	0.943	0
Cacna1b	0	0.306936	0.962	0.907	0
Grin1	0	-0.484215	0.825	0.874	0
Olfm1	0	-0.514704	0.435	0.611	0
Ntng2	0	-0.308114	0.063	0.243	0
Lmx1b	0	0.618283	0.71	0.315	0
Lrp1b	0	-0.761164	0.989	0.969	0
Arhgap15	0	-0.321824	0.064	0.238	0
Zeb2	0	-1.41457	0.074	0.365	0
Kcnj3	0	-0.836383	0.604	0.734	0
Nr4a2	0	0.399267	0.651	0.379	0
Tanc1	0	-0.73353	0.101	0.39	0
Scn3a	0	0.79209	0.969	0.83	0
Scn9a	0	0.356918	0.856	0.664	0
B3galt1	0	1.0665	0.984	0.947	0
Osbpl6	0	-0.627528	0.701	0.823	0
Zfp385b	0	-1.04266	0.409	0.657	0
Gm13944	0	-0.371708	0.103	0.338	0
Lrrc4c	0	-1.13331	0.94	0.955	0
Slc1a2	0	0.635588	0.868	0.669	0
Mpped2	0	0.537872	0.913	0.743	0
Ryr3	0	-0.713699	0.743	0.861	0
Meis2	0	-1.24667	0.046	0.267	0
Rasgrp1	0	-0.510948	0.148	0.378	0
Sema6d	0	0.395978	0.961	0.792	0
Pak7	0	0.441774	0.905	0.771	0
Macrod2	0	-0.32666	0.995	0.972	0
Rin2	0	0.505765	0.645	0.374	0
9030622O22Rik	0	1.4681	0.903	0.253	0
Nnat	0	0.460031	0.821	0.671	0
Ptprt	0	-0.961045	0.304	0.519	0
Cbln4	0	0.278937	0.252	0.076	0
Zfp831	0	-0.29893	0.035	0.242	0
Ntsr1	0	0.495371	0.531	0.254	0
Gm27032	0	-0.307728	0.28	0.522	0
Cask	0	0.417904	0.922	0.86	0
Slc9a7	0	0.407654	0.822	0.746	0
Il13ra1	0	0.324795	0.447	0.234	0
Zcchc12	0	0.378827	0.628	0.414	0
Tmem255a	0	0.86158	0.792	0.433	0
Tenm1	0	0.783311	0.991	0.912	0
Smarca1	0	0.559039	0.788	0.614	0
Fgf13	0	0.302556	0.874	0.75	0
Aff2	0	-0.679523	0.55	0.758	0
Mamld1	0	-0.289827	0.215	0.448	0
Dmd	0	0.600263	0.987	0.949	0
Phka1	0	0.426151	0.756	0.543	0
Ftx	0	0.373242	0.954	0.895	0
Nexmif	0	0.571684	0.914	0.784	0
Tmem164	0	0.42118	0.748	0.571	0
Rtl4	0	-0.562552	0.37	0.596	0
Gm15155	0	-0.63577	0.213	0.478	0
Glra2	0	0.895953	0.573	0.256	0
Frmpd4	0	-1.97327	0.556	0.82	0
Mid1	0	0.855941	0.6	0.32	0
2700069I18Rik	0	0.380527	0.441	0.23	0
Zfhx4	0	0.615913	0.797	0.552	0
Gm37459	0	-0.398647	0.187	0.42	0
Pex5l	0	-1.30637	0.719	0.834	0
4930419G24Rik	0	-0.719462	0.303	0.569	0
Sclt1	0	0.343725	0.897	0.846	0
D3Ertd751e	0	0.368249	0.72	0.601	0
Maml3	0	0.505877	0.859	0.646	0
Trpc4	0	0.425384	0.608	0.401	0
Kcnab1	0	1.16635	0.8	0.553	0
A330015K06Rik	0	0.75009	0.64	0.373	0
Gm21949	0	0.574715	0.747	0.471	0
Serpini1	0	0.439704	0.712	0.544	0
Golim4	0	0.514999	0.486	0.234	0
Fstl5	0	1.31399	0.901	0.611	0
Bcan	0	-0.351174	0.037	0.215	0
Gm3764	0	-0.57762	0.025	0.319	0
Kcnn3	0	0.466155	0.805	0.657	0
Vav3	0	-0.996306	0.294	0.498	0
Ntng1	0	-2.50211	0.368	0.733	0
Dkk2	0	0.270153	0.158	0.04	0
Tacr3	0	0.917666	0.481	0.157	0
Ppp3ca	0	-0.414204	0.97	0.967	0
Tspan5	0	-0.590684	0.621	0.757	0
Lmo4	0	-0.463239	0.319	0.554	0
Ddah1	0	0.784837	0.818	0.561	0
Ak5	0	-1.33597	0.246	0.647	0
Runx1t1	0	-0.801118	0.38	0.683	0
Necab1	0	0.935026	0.752	0.463	0
Calb1	0	0.657766	0.606	0.332	0
Epha7	0	-0.788922	0.328	0.621	0
Bach2	0	0.587128	0.895	0.76	0
Mob3b	0	0.666683	0.58	0.304	0
Lingo2	0	-0.685406	0.954	0.922	0
Gm2163	0	-0.415385	0.597	0.749	0
4930578G10Rik	0	-0.493409	0.393	0.624	0
Phf24	0	-0.425667	0.57	0.737	0
Unc13b	0	0.360065	0.787	0.664	0
Frmpd1	0	0.610152	0.587	0.309	0
Plppr1	0	0.582272	0.812	0.636	0
Ptpn3	0	-0.767538	0.144	0.442	0
Zkscan16	0	0.338029	0.612	0.469	0
Zfp618	0	0.369332	0.786	0.647	0
Whrn	0	0.695136	0.741	0.37	0
Pappa	0	0.80619	0.494	0.207	0
Brinp1	0	-1.04999	0.608	0.841	0
Frmd3	0	0.520383	0.796	0.644	0
Ptprd	0	-1.62818	0.984	0.971	0
Frem1	0	0.427344	0.458	0.169	0
Bnc2	0	0.506303	0.575	0.331	0
Sh3gl2	0	-0.577183	0.795	0.86	0
Cachd1	0	0.44149	0.695	0.534	0
Lepr	0	0.470469	0.388	0.217	0
Ssbp3	0	0.436522	0.767	0.646	0
Epha10	0	0.629326	0.834	0.656	0
Grik3	0	0.813018	0.916	0.569	0
Ptpru	0	0.706557	0.826	0.488	0
Vwa5b1	0	0.656748	0.597	0.186	0
Ubr4	0	0.370756	0.741	0.634	0
Kazn	0	0.431473	0.678	0.487	0
Gm13052	0	0.607512	0.752	0.527	0
Ajap1	0	0.531892	0.798	0.606	0
Plch2	0	-0.261905	0.047	0.249	0
Cdk14	0	0.575582	0.991	0.921	0
En2	0	0.377181	0.407	0.126	0
Cnpy1	0	0.513989	0.627	0.253	0
Otof	0	-0.32871	0.013	0.172	0
Dpysl5	0	0.554208	0.806	0.551	0
Zfyve28	0	-0.373594	0.384	0.601	0
Ldb2	0	-1.03894	0.291	0.627	0
Kcnip4	0	-0.883408	0.989	0.969	0
Ppargc1a	0	-0.583669	0.233	0.539	0
Sel1l3	0	-0.34887	0.14	0.339	0
N4bp2	0	0.373309	0.568	0.362	0
Atp8a1	0	0.408057	0.921	0.826	0
Gabra2	0	-0.903464	0.591	0.693	0
Slc10a4	0	0.383075	0.507	0.202	0
Rasgef1b	0	0.394868	0.954	0.831	0
Tmem150c	0	0.403007	0.723	0.593	0
Sparcl1	0	-0.531217	0.169	0.42	0
Ttc28	0	0.355739	0.837	0.704	0
Acacb	0	0.285522	0.226	0.056	0
Cabp1	0	-0.421552	0.153	0.424	0
Nos1	0	-0.297832	0.049	0.226	0
Caln1	0	-0.665197	0.743	0.79	0
Galnt17	0	-0.938922	0.53	0.703	0
Elfn1	0	0.339155	0.473	0.234	0
Sdk1	0	0.781608	0.913	0.703	0
Tmem130	0	0.382867	0.829	0.714	0
Foxp2	0	1.27276	0.97	0.577	0
Cttnbp2	0	-0.752386	0.842	0.885	0
Cadps2	0	0.890664	0.929	0.695	0
Plxna4	0	0.496423	0.973	0.874	0
Ubn2	0	0.275026	0.977	0.94	0
Dennd2a	0	0.380923	0.614	0.423	0
Tmem178b	0	0.259223	0.993	0.96	0
Cntnap2	0	0.314657	0.999	0.966	0
Chn2	0	0.575598	0.534	0.289	0
Pde1c	0	0.722944	0.512	0.271	0
Snca	0	0.612769	0.825	0.732	0
St3gal5	0	-0.403785	0.27	0.521	0
Lrrtm4	0	-1.32338	0.782	0.894	0
Podxl2	0	0.428564	0.77	0.606	0
Grip2	0	0.443446	0.762	0.455	0
Magi1	0	0.792042	0.998	0.948	0
Mitf	0	-0.464713	0.26	0.528	0
Cntn3	0	-1.04367	0.407	0.598	0
Chl1	0	0.719576	0.943	0.802	0
Cntn4	0	-1.32649	0.603	0.789	0
Atp2b2	0	-0.415673	0.848	0.895	0
Syn2	0	-0.975764	0.586	0.788	0
Timp4	0	-0.310842	0.107	0.354	0
Pparg	0	-0.282559	0.022	0.217	0
Ret	0	0.877867	0.896	0.406	0
Ano2	0	0.375139	0.321	0.162	0
Ntf3	0	0.4816	0.426	0.182	0
Kcna1	0	-0.516847	0.099	0.394	0
Ccnd2	0	-0.320337	0.071	0.258	0
Prmt8	0	-0.382372	0.134	0.369	0
Plekha5	0	0.326519	0.976	0.928	0
Sox5	0	-1.05735	0.197	0.452	0
Usp29	0	0.618664	0.986	0.871	0
Scn1b	0	-0.349043	0.237	0.478	0
Tshz3	0	-0.57087	0.178	0.408	0
Zfp536	0	-0.852188	0.072	0.325	0
Slc17a7	0	-0.719415	0.074	0.37	0
Kcnc1	0	-0.437049	0.374	0.581	0
Otud7a	0	-0.707253	0.885	0.926	0
Apba2	0	-0.54649	0.662	0.798	0
Nr2f2	0	-0.44418	0.065	0.322	0
Sv2b	0	-0.855472	0.436	0.629	0
Mir9-3hg	0	-0.543474	0.138	0.438	0
Grm5	0	-1.08682	0.919	0.918	0
Dlg2	0	-0.593785	0.998	0.984	0
Gm32647	0	-2.40348	0.212	0.504	0
Tenm4	0	-0.96982	0.792	0.854	0
Gab2	0	0.529212	0.919	0.796	0
Nrip3	0	-0.36054	0.254	0.477	0
Tead1	0	0.485463	0.568	0.404	0
Syt17	0	0.675216	0.734	0.537	0
Gm45846	0	0.362997	0.812	0.676	0
Plpp4	0	1.30544	0.687	0.157	0
Ebf3	0	0.78862	0.702	0.273	0
Th	0	1.0915	0.889	0.335	0
Vip	0	0.855132	0.101	0.025	0
Ust	0	-0.727812	0.056	0.355	0
Gm28905	0	0.780273	0.878	0.597	0
Grm1	0	-1.62634	0.361	0.767	0
4930567K20Rik	0	-0.302766	0.051	0.277	0
Hivep2	0	-0.579678	0.908	0.916	0
Gm26835	0	-0.473049	0.607	0.749	0
Pde7b	0	-0.965055	0.273	0.466	0
Ahi1	0	0.50605	0.998	0.963	0
Tmem200a	0	0.492083	0.681	0.439	0
Ptprk	0	-0.816709	0.566	0.711	0
Clvs2	0	0.43796	0.832	0.741	0
Rev3l	0	0.324865	0.939	0.89	0
Fam184a	0	0.35893	0.916	0.729	0
Arid5b	0	-0.637775	0.437	0.728	0
Syn3	0	0.390072	0.905	0.795	0
Ano4	0	-1.07902	0.386	0.707	0
Rmst	0	1.18526	0.893	0.438	0
Ntn4	0	0.305503	0.398	0.209	0
Tmcc3	0	0.503809	0.692	0.575	0
Atp2b1	0	-1.06309	0.698	0.842	0
Nav3	0	-0.841895	0.911	0.923	0
Msrb3	0	-0.260909	0.136	0.338	0
Srgap1	0	0.554757	0.904	0.698	0
Fam19a2	0	-1.33022	0.425	0.615	0
Csmd1	0	0.389063	0.999	0.975	0
Zmat4	0	-1.25635	0.269	0.598	0
Chrnb3	0	0.429492	0.583	0.265	0
Chrna6	0	0.560553	0.571	0.233	0
Sgcz	0	-0.885701	0.887	0.895	0
C130073E24Rik	0	0.391283	0.697	0.449	0
Galntl6	0	0.685535	0.99	0.892	0
Gm26905	0	0.574809	0.927	0.658	0
Csgalnact1	0	-0.674911	0.121	0.395	0
Arhgap10	0	-0.369323	0.076	0.289	0
Rnf150	0	-0.477185	0.617	0.763	0
Cacna1a	0	0.447961	0.992	0.951	0
Neto2	0	0.493331	0.687	0.559	0
Tox3	0	0.617402	0.763	0.559	0
Ndrg4	0	-0.467896	0.822	0.898	0
Zfhx3	0	1.37415	0.995	0.71	0
Lncbate1	0	0.321832	0.397	0.193	0
Calb2	0	0.383213	0.455	0.25	0
Cntnap4	0	0.477197	0.929	0.706	0
Vat1l	0	0.391451	0.763	0.591	0
Plcg2	0	0.340053	0.345	0.13	0
Cdh13	0	0.998051	0.862	0.768	0
Gm3002	0	0.256383	0.331	0.17	0
Gm3173	0	0.314225	0.403	0.237	0
Gm10406	0	0.304565	0.336	0.16	0
4933406F09Rik	0	0.382192	0.413	0.227	0
Ptprg	0	0.396118	0.967	0.897	0
Cadps	0	-0.446048	0.987	0.96	0
Lrrc3b	0	0.395535	0.78	0.609	0
Rarb	0	-0.320436	0.102	0.313	0
Thrb	0	-1.21941	0.487	0.791	0
Gm48321	0	-0.333297	0.098	0.352	0
Gm2237	0	0.349968	0.347	0.178	0
Kcnma1	0	-0.362039	0.991	0.962	0
Erc2	0	0.768567	0.998	0.966	0
Cacna2d3	0	-0.613471	0.716	0.894	0
Lrtm1	0	-0.253469	0.187	0.425	0
Samd4	0	0.415315	0.822	0.649	0
Gch1	0	0.311804	0.329	0.142	0
Peli2	0	-0.28397	0.019	0.196	0
Otx2	0	0.282404	0.213	0.012	0
Otx2os1	0	1.2482	0.52	0.057	0
Zdhhc20	0	0.344748	0.875	0.815	0
Xkr6	0	0.48759	0.964	0.754	0
Ptk2b	0	-0.710743	0.085	0.376	0
Nefm	0	-0.413416	0.144	0.362	0
Fndc3a	0	0.478226	0.898	0.753	0
Enox1	0	-0.780084	0.723	0.832	0
Pcdh17	0	-0.691836	0.33	0.641	0
Pcdh9	0	-0.839892	0.928	0.965	0
Klhl1	0	0.982035	0.953	0.58	0
Gpc6	0	1.74297	0.983	0.73	0
Pdgfd	0	0.577691	0.232	0.05	0
Cntn5	0	-2.19931	0.519	0.804	0
Amotl1	0	0.734226	0.8	0.438	0
Icam5	0	-0.32839	0.066	0.28	0
Dock6	0	0.3628	0.401	0.174	0
Bbs9	0	0.402977	0.83	0.704	0
Ntm	0	-1.01793	0.754	0.872	0
Nrgn	0	-0.647373	0.37	0.596	0
Scn3b	0	0.319387	0.67	0.524	0
Ubash3b	0	0.338919	0.643	0.466	0
Gm48742	0	0.491283	0.656	0.448	0
CT025619.1	0	0.52602	0.948	0.86	0
Thy1	0	-0.48755	0.25	0.546	0
Kmt2a	0	0.335054	0.956	0.914	0
Zbtb16	0	-0.43088	0.102	0.359	0
Drd2	0	0.572728	0.777	0.307	0
Ncam1	0	0.269319	0.995	0.959	0
Arhgap20	0	-0.493648	0.342	0.638	0
Glce	0	0.364317	0.704	0.56	0
Smad3	0	-0.325507	0.081	0.264	0
Megf11	0	-0.569592	0.082	0.267	0
Usp3	0	-0.335781	0.155	0.422	0
Fam81a	0	-0.372668	0.068	0.339	0
Tcf12	0	0.510103	0.918	0.86	0
Unc13c	0	0.645937	0.581	0.421	0
Mlip	0	-0.588353	0.102	0.342	0
Rasgrf1	0	-1.05742	0.309	0.693	0
Clstn2	0	0.361887	0.937	0.848	0
Slco2a1	0	0.557422	0.562	0.274	0
Arpp21	0	-1.89287	0.467	0.643	0
Rbms3	0	0.505551	0.961	0.808	0
Cck	0	0.736976	0.658	0.466	0
9530059O14Rik	0	-0.549897	0.706	0.832	0
Vwc2	0	-0.535334	0.159	0.374	0
Ddc	0	1.0258	0.962	0.46	0
1700042O10Rik	0	0.958141	0.945	0.411	0
Grb10	0	0.510123	0.944	0.776	0
Ehbp1	0	1.26274	0.979	0.916	0
Slit3	0	-2.01661	0.236	0.603	0
Tenm2	0	-1.09037	0.923	0.941	0
Adra1b	0	0.501889	0.481	0.226	0
Ebf1	0	1.20611	0.513	0.29	0
Sgcd	0	0.934	0.979	0.881	0
Fstl4	0	-0.860457	0.151	0.426	0
Gria1	0	-0.804564	0.886	0.902	0
Rnf112	0	-0.489114	0.424	0.608	0
Gas7	0	-0.479269	0.277	0.483	0
Glp2r	0	-0.699577	0.273	0.52	0
Ntn1	0	1.11281	0.872	0.381	0
Rtn4rl1	0	-0.374344	0.09	0.303	0
Nxn	0	0.413774	0.533	0.288	0
Sez6	0	-0.30862	0.164	0.391	0
Wsb1	0	0.44262	0.895	0.782	0
Nf1	0	0.290436	0.961	0.925	0
Asic2	0	-1.20312	0.704	0.86	0
Gm11418	0	-0.310162	0.089	0.3	0
Ppm1e	0	-0.552334	0.839	0.895	0
Ankfn1	0	0.57155	0.557	0.372	0
A830036E02Rik	0	-0.318109	0.011	0.179	0
Nsf	0	-0.464956	0.876	0.925	0
Cacng4	0	0.340686	0.545	0.307	0
Cep112	0	-0.801365	0.3	0.497	0
Rgs9	0	0.298452	0.452	0.242	0
Gaa	0	0.361219	0.744	0.598	0
Baiap2	0	-0.561131	0.181	0.431	0
Adarb2	0	1.02472	0.971	0.645	0
Ryr2	0	-0.869372	0.648	0.727	0
Gng4	0	0.309973	0.469	0.291	0
4933412O06Rik	0	-0.250443	0.082	0.307	0
Ripor2	0	-0.959584	0.192	0.682	0
A330102I10Rik	0	-0.620345	0.237	0.522	0
Mboat1	0	0.367427	0.388	0.172	0
Gmds	0	0.54936	0.944	0.877	0
Slc22a23	0	-0.425794	0.489	0.723	0
Spock1	0	-1.33492	0.444	0.733	0
Slc6a3	0	0.443679	0.702	0.34	0
Nr2f1	0	-0.351717	0.05	0.301	0
A830082K12Rik	0	-0.726412	0.13	0.472	0
Adgrv1	0	0.698719	0.55	0.224	0
C130071C03Rik	0	-0.724392	0.499	0.775	0
Edil3	0	-1.80649	0.328	0.648	0
Ssbp2	0	-0.394435	0.79	0.874	0
Rasgrf2	0	0.468657	0.872	0.687	0
Msh3	0	0.616793	0.678	0.575	0
Sv2c	0	0.427667	0.761	0.41	0
Mast4	0	-0.740024	0.76	0.864	0
Rgs7bp	0	-0.805818	0.664	0.836	0
Pde4d	0	0.58076	0.998	0.961	0
Plk2	0	-0.253656	0.098	0.302	0
Gzmk	0	0.329985	0.32	0.163	0
Hcn1	0	-1.37657	0.328	0.608	0
4933413L06Rik	0	-0.311618	0.053	0.268	0
Fgf10	0	0.72172	0.354	0.174	0
Fam49a	0	-0.419006	0.368	0.603	0
Etv1	0	-0.705327	0.123	0.374	0
Akap6	0	0.489904	0.993	0.958	0
Ttc6	0	0.700172	0.808	0.359	0
Mdga2	0	-0.549275	0.989	0.971	0
Kcnh5	0	0.757479	0.555	0.327	0
Fut8	0	0.662688	0.909	0.816	0
Nrxn3	0	0.484629	0.999	0.962	0
Ston2	0	0.439438	0.468	0.205	0
3300002A11Rik	0	0.427554	0.558	0.375	0
Calm1	0	-0.524996	0.852	0.911	0
Slc24a4	0	-0.358558	0.038	0.231	0
Prima1	0	0.280244	0.399	0.219	0
Bcl11b	0	-0.59309	0.064	0.351	0
Dlk1	0	0.898316	0.844	0.368	0
Meg3	0	0.302952	1	0.995	0
Mirg	0	0.364582	0.943	0.869	0
Ptprn2	0	0.300922	0.994	0.95	0
Tmem196	0	0.439208	0.682	0.455	0
Ghr	0	2.01511	0.927	0.579	0
Plcxd3	0	0.334739	0.89	0.712	0
Cdh18	0	0.806289	0.978	0.89	0
Fbxl7	0	1.09154	0.814	0.513	0
Ankrd33b	0	-0.363511	0.018	0.214	0
Gm32618	0	0.458524	0.546	0.346	0
Sdc2	0	0.97932	0.849	0.588	0
Cpq	0	0.777195	0.77	0.521	0
Oxr1	0	-2.03908	0.517	0.773	0
Ext1	0	0.511299	0.932	0.859	0
Col14a1	0	0.281961	0.218	0.077	0
Adcy8	0	-0.895233	0.26	0.58	0
Gm21798	0	-0.448249	0.128	0.381	0
Khdrbs3	0	-0.894719	0.596	0.745	0
Adgrb1	0	-0.506386	0.458	0.673	0
Ly6h	0	0.35016	0.957	0.855	0
Cpne8	0	0.576393	0.671	0.464	0
Pdzrn4	0	0.496392	0.978	0.835	0
Tmem117	0	0.329229	0.893	0.796	0
Scn8a	0	-0.713262	0.736	0.876	0
AC124490.1	0	-0.300905	0.015	0.182	0
Rbfox1	0	-3.79241	0.523	0.886	0
Shisa9	0	0.527923	0.941	0.816	0
Gm15738	0	-0.391447	0.586	0.755	0
Aifm3	0	-0.358942	0.219	0.462	0
Fgf12	0	-0.41431	0.991	0.965	0
Acap2	0	-0.42192	0.615	0.753	0
Kalrn	0	-0.872017	0.941	0.939	0
Casr	0	0.487356	0.306	0.047	0
Fstl1	0	-0.272317	0.062	0.274	0
Igsf11	0	-0.321176	0.042	0.214	0
Lsamp	0	0.480467	1	0.989	0
Gap43	0	0.433557	0.96	0.873	0
Zbtb20	0	0.295558	0.987	0.904	0
Nectin3	0	-0.419617	0.195	0.428	0
Alcam	0	0.469526	0.839	0.672	0
AC129186.1	0	-1.27755	0.019	0.278	0
Dscam	0	0.634256	0.996	0.923	0
Tcte2	0	0.422978	0.833	0.711	0
Baiap3	0	0.549623	0.612	0.283	0
Lrfn2	0	-0.750404	0.261	0.63	0
Efna5	0	0.305263	0.846	0.677	0
Epb41l3	0	-0.718865	0.571	0.728	0
Dlgap1	0	-1.08655	0.97	0.97	0
5031415H12Rik	0	-0.281258	0.081	0.305	0
Galnt14	0	-0.573212	0.071	0.298	0
Tmem178	0	-0.428192	0.1	0.337	0
Kcng3	0	0.348138	0.331	0.131	0
Calm2	0	-0.443032	0.856	0.907	0
Zeb1	0	0.302282	0.953	0.872	0
Mkx	0	0.511278	0.504	0.324	0
Mpp7	0	0.40033	0.658	0.454	0
Klhl14	0	0.336339	0.214	0.045	0
Rit2	0	0.567487	0.984	0.91	0
Epb41l4a	0	0.315449	0.674	0.407	0
Ctnna1	0	0.834535	0.753	0.467	0
Nr3c1	0	-0.46488	0.261	0.501	0
2900055J20Rik	0	-0.560794	0.077	0.365	0
Kctd16	0	-1.75095	0.354	0.599	0
Mcc	0	1.78941	0.96	0.563	0
A930012L18Rik	0	0.261584	0.308	0.124	0
Prr16	0	1.15351	0.984	0.715	0
Camk2a	0	-0.819888	0.725	0.759	0
Ablim3	0	0.465693	0.793	0.571	0
Dcc	0	0.660992	0.997	0.91	0
Mapk4	0	-0.554498	0.118	0.392	0
Zbtb7c	0	0.621693	0.561	0.267	0
St8sia5	0	-0.411994	0.044	0.354	0
Neto1	0	-0.963862	0.167	0.435	0
Aldh1a1	0	0.897487	0.389	0.207	0
Gda	0	-0.684285	0.069	0.36	0
Trpm3	0	1.37355	0.985	0.751	0
Apba1	0	0.302654	0.978	0.926	0
Slc1a1	0	-0.374418	0.404	0.611	0
Prkg1	0	0.528722	0.989	0.901	0
Crtac1	0	-0.383137	0.15	0.354	0
Gbf1	0	0.47014	0.949	0.883	0
Sorcs3	0	0.758685	0.739	0.605	0
Add3	0	-0.337181	0.316	0.553	0
Atrnl1	0	-0.743106	0.762	0.863	0
Gfra1	0	1.33987	0.866	0.354	0
Hspa12a	0	-0.325878	0.288	0.516	0
Slc18a2	0	0.992274	0.927	0.536	0
Fam19a5	0	-0.374792	0.653	0.798	0
Ptchd1	0	-0.348657	0.219	0.429	0
Luzp2	0	0.300169	0.884	0.743	0
Ralgps2	0	0.342565	0.795	0.726	0
Lrch3	0	0.288387	0.871	0.812	0
Acaca	0	0.289082	0.91	0.865	0
Rock1	0	0.287079	0.922	0.876	0
Kirrel3	0	-0.433191	0.641	0.848	0
Sipa1l1	0	-0.456632	0.768	0.839	0
Pip5k1b	0	0.332935	0.837	0.727	0
4430402I18Rik	0	-0.317369	0.331	0.546	0
Dgkz	0	-0.327787	0.431	0.646	0
Rnpc3	0	0.32844	0.826	0.747	0
Ano3	0	-0.775272	0.343	0.511	0
Galnt7	0	-0.325858	0.309	0.528	0
Anks1b	0	-0.335612	0.997	0.975	0
Gad2	0	-0.767024	0.127	0.304	0
Arhgap26	0	0.339301	0.965	0.913	0
Ptchd4	0	-0.600379	0.284	0.47	0
Atp2b4	0	0.285682	0.707	0.529	0
Daam1	0	0.290523	0.865	0.814	0
Fign	0	-0.58269	0.071	0.238	0
Acadsb	0	0.319241	0.817	0.751	0
March3	0	-0.309282	0.181	0.385	0
Prmt2	0	0.289701	0.686	0.557	0
Lynx1	0	-0.266385	0.183	0.385	0
Nell1	0	-1.17266	0.419	0.561	0
Adarb1	0	-0.575126	0.573	0.729	0
Tgfbr3	0	0.36201	0.622	0.483	0
Gng12	0	-0.282343	0.11	0.295	0
Ank1	0	0.304833	0.811	0.68	0
Cldn34c1	0	0.303537	0.432	0.273	0
4930555F03Rik	0	0.290264	0.521	0.33	0
Mgll	0	-0.306692	0.131	0.316	0
Gm12394	0	-0.300409	0.347	0.55	0
Vav2	0	0.27096	0.313	0.169	0
Pcdh15	0	0.600162	0.905	0.878	0
Atp1b3	0	-0.321441	0.372	0.575	0
Syndig1	0	-0.374312	0.181	0.375	0
Camk1d	0	-0.489283	0.929	0.95	0
Agbl4	0	0.257194	0.992	0.95	0
Arhgap18	0	0.309723	0.745	0.614	0
Stx16	0	0.291949	0.843	0.774	0
Synpo	0	-0.268583	0.101	0.279	0
Scml4	0	0.303671	0.608	0.432	0
4930587E11Rik	0	-0.269311	0.091	0.266	0
Zcchc11	0	0.297712	0.914	0.871	0
Gm45645	0	0.310755	0.532	0.38	0
Akap9	0	0.268931	0.887	0.838	0
A830018L16Rik	0	-0.963818	0.519	0.634	0
Cuedc1	0	0.303418	0.646	0.52	0
Crym	0	-0.274153	0.066	0.23	0
Ammecr1	0	0.301739	0.795	0.658	0
Nefl	0	-0.352177	0.252	0.455	0
Rims1	0	0.312866	0.996	0.96	0
Lemd1	0	0.272623	0.357	0.203	0
Gria2	0	-0.322323	0.993	0.972	0
Gabra5	0	-0.330632	0.162	0.35	0
Itgb8	0	0.26095	0.445	0.278	0
Sh3pxd2a	0	-0.252269	0.213	0.41	0
Hmgcll1	0	0.374635	0.838	0.763	0
Got1	0	-0.306936	0.338	0.549	0
Dscaml1	0	-0.739792	0.3	0.475	0
Tmtc1	0	0.386617	0.755	0.652	0
Cmip	0	0.260036	0.946	0.903	0
Bicc1	0	0.297482	0.703	0.556	0
Plcb4	0	0.2868	0.909	0.709	0
Gm26691	0	0.400659	0.804	0.705	0
4930445B16Rik	0	-0.340631	0.19	0.383	0
Sorcs2	0	-0.363145	0.366	0.565	0
Fhod3	0	0.279979	0.815	0.675	0
Gm45844	0	0.319158	0.655	0.545	0
Rspo2	0	-0.328231	0.026	0.167	0
Nfix	0	-0.314168	0.114	0.289	0
Flrt2	0	0.417334	0.713	0.599	0
Cab39l	0	0.320292	0.694	0.605	0
4930509J09Rik	0	-0.535098	0.176	0.348	0
Mast2	0	0.284462	0.898	0.846	0
Prickle1	0	-0.467617	0.863	0.882	0
Nfib	0	-0.984239	0.255	0.417	0
Gm4876	0	0.272807	0.596	0.432	0
Kitl	0	-0.486598	0.1	0.266	0
Gm26917	0	0.270272	0.841	0.772	0
Zfpm2	0	-1.23905	0.21	0.367	0
Elavl4	0	0.301168	0.91	0.831	0
Cacnb4	0	-0.496984	0.869	0.889	0
Actr3b	0	-0.281773	0.423	0.614	0
Ndst3	0	0.443507	0.707	0.57	0
Pdia5	0	0.474047	0.373	0.237	0
Ttc7b	0	-0.344168	0.725	0.819	0
Epha5	0	0.312611	0.962	0.911	0
Cpne4	0	-0.624012	0.709	0.81	0
Pde8b	0	0.330894	0.765	0.629	0
Zswim5	0	0.324081	0.733	0.63	0
Ctnna3	0	-0.531523	0.801	0.853	0
Trpc3	0	-0.341304	0.049	0.195	0
Huwe1	0	0.25132	0.948	0.909	0
Mkl2	0	-0.336464	0.786	0.856	0
Carmil3	0	0.307835	0.653	0.538	0
Cntn1	0	0.276766	0.987	0.955	0
Pcdh10	0	0.36546	0.706	0.605	0
Mid2	0	0.292181	0.53	0.401	0
Pkia	0	0.27416	0.886	0.821	0
Glis3	0	-0.443491	0.019	0.145	0
Ocrl	0	0.292069	0.801	0.763	0
Wasf1	0	-0.395908	0.502	0.649	0
Clgn	0	0.39915	0.554	0.43	0
Rimklb	0	0.270779	0.526	0.394	0
Coro6	0	-0.307682	0.144	0.308	0
Rab27b	0	0.345399	0.702	0.583	0
Gad1	0	-0.525488	0.108	0.265	0
Gm20754	0	-0.991828	0.378	0.516	0
Slc32a1	0	-0.284062	0.043	0.182	0
Zfp612	0	0.286448	0.683	0.589	0
Htr2c	0	-1.14917	0.369	0.525	0
Parm1	0	0.407506	0.542	0.415	0
Drp2	0	0.278862	0.631	0.511	0
Cx3cl1	0	-0.25071	0.315	0.516	0
Dync2h1	0	0.265039	0.857	0.812	0
Cntnap5a	0	0.304327	0.929	0.845	0
Cers4	0	0.272294	0.776	0.707	0
Slc4a4	0	-0.594446	0.143	0.305	0
Lpp	0	-0.409922	0.455	0.626	0
Gm46102	0	-0.250012	0.09	0.245	0
Htr1f	0	-0.607587	0.381	0.542	0
Scmh1	0	0.260161	0.923	0.883	0
Gm21954	0	-0.257594	0.287	0.471	0
Pard3b	0	0.460259	0.478	0.338	0
Gm45323	0	0.261812	0.454	0.292	0
Col8a1	0	0.313897	0.305	0.171	0
Cd200	0	0.277167	0.594	0.478	0
Plekha7	0	0.253426	0.788	0.653	0
Nbeal1	0	0.254407	0.878	0.826	0
Cdh12	0	-0.834996	0.385	0.533	0
Ephb2	0	0.287188	0.701	0.593	0
Ppp4r4	0	-0.307075	0.436	0.621	0
Frmd6	0	-0.251118	0.121	0.282	0
Mfsd6	0	0.259703	0.706	0.606	0
Ldhb	0	-0.401918	0.539	0.703	0
Camta1	0	-0.378714	0.938	0.935	0
Lgr5	0	-0.298373	0.019	0.138	0
Snrpn	0	-0.390715	0.531	0.684	0
Mbnl2	0	-0.320981	0.867	0.907	0
Lzts1	0	-0.291081	0.183	0.346	0
Egfem1	0	-0.977282	0.519	0.629	0
Pbdc1	0	0.269821	0.625	0.505	0
Fat3	0	-0.388599	0.765	0.862	0
Nr3c2	0	-0.540884	0.746	0.818	0
Gm45881	0	0.285769	0.83	0.718	0
Ppp1r14c	0	-0.259426	0.227	0.413	0
Thada	0	0.262679	0.811	0.763	0
AW554918	0	0.271256	0.824	0.773	0
Zdhhc14	0	-0.475313	0.676	0.755	0
Lrrc7	0	-0.547355	0.983	0.951	0
C1qtnf4	0	-0.277053	0.279	0.462	0
Crim1	0	0.350233	0.721	0.599	0
Synpr	0	-0.586494	0.117	0.268	0
Cdc42ep3	0	0.255521	0.496	0.359	0
Gm44644	0	0.261492	0.488	0.354	0
Pou2f2	0	0.402358	0.538	0.431	0
Cpeb1	0	-0.266463	0.558	0.717	0
Mir124a-1hg	0	-0.331884	0.746	0.822	0
Nsmf	0	-0.306871	0.431	0.609	0
Coro2b	0	-0.251515	0.373	0.555	0
Rtl1	0	0.281376	0.574	0.467	0
Kif16b	0	0.296449	0.723	0.665	0
Pip4k2a	0	-0.313619	0.314	0.498	0
Enox2	0	-0.261245	0.255	0.436	0
Mipol1	0	0.282168	0.683	0.578	0
Hs3st4	0	-1.35486	0.291	0.442	0
Ndst4	0	-0.571505	0.209	0.367	0
Ell2	0	-0.300115	0.194	0.36	0
Arglu1	0	0.252472	0.968	0.941	0
Nrg3	0	-0.252837	0.987	0.977	0
Mtus2	0	-0.335735	0.589	0.729	0
Il1rap	0	0.280397	0.784	0.645	0
Slit2	0	0.261063	0.798	0.643	0
Man1a	0	-0.510659	0.215	0.377	0
Ptn	0	-0.501487	0.276	0.436	0
Mast3	0	-0.323284	0.213	0.37	0
Gpm6b	0	-0.676822	0.628	0.711	0
Dok6	0	0.353274	0.963	0.925	0
Cpne6	0	-0.305616	0.315	0.48	0
Gm5577	0	0.281804	0.624	0.533	0
Trpc5	0	-0.356275	0.301	0.477	0
Gm16083	0	0.286995	0.699	0.588	0
Tcf7l2	0	-0.847901	0.061	0.185	0
Efr3a	0	-0.377479	0.537	0.675	0
Sptan1	0	-0.258245	0.851	0.889	0
Pcdh11x	0	-0.841356	0.321	0.478	0
Stum	0	-0.28787	0.16	0.311	0
Prkcb	0	-0.36285	0.901	0.909	0
Mta3	0	0.262281	0.746	0.692	0
Rnf182	0	-0.254219	0.11	0.253	0
Gtdc1	0	-0.375118	0.643	0.743	0
Ccdc82	0	0.261892	0.525	0.405	0
Bend7	0	0.524226	0.365	0.252	0
Cnksr2	0	-0.519041	0.848	0.862	0
Ncald	0	-0.392708	0.753	0.834	0
Adgra1	0	-0.290853	0.432	0.595	0
Tbc1d8	0	0.266329	0.537	0.429	0
Man2a1	0	-0.256728	0.341	0.524	0
Cdkl5	0	-0.412592	0.529	0.654	0
Gm10754	0	-0.36844	0.119	0.259	0
Esrrg	0	-0.544124	0.739	0.802	0
Pcsk6	0	0.262198	0.276	0.157	0
Kcnmb2	0	-0.598069	0.209	0.361	0
Sncb	0	-0.311623	0.541	0.701	0
Slc7a14	0	-0.344908	0.403	0.557	0
Slc25a3	0	-0.308674	0.675	0.794	0
Mpp6	0	-0.381315	0.522	0.653	0
Lrrtm3	0	-0.42584	0.762	0.811	0
Mef2c	0	-0.581268	0.537	0.69	0
Btbd11	0	0.287585	0.733	0.585	0
Syt4	0	0.25399	0.686	0.604	0
Dach1	0	-0.667489	0.15	0.289	0
Fras1	0	-0.42841	0.33	0.482	0
Pld5	0	-0.721385	0.301	0.429	0
Pde4a	0	-0.252225	0.407	0.57	0
Cntln	0	0.279743	0.771	0.712	0
Flt3	0	-0.251677	0.216	0.364	0
Kcnip3	0	-0.386048	0.403	0.538	0
Plxnc1	0	0.313556	0.594	0.503	0
Nrg3os	0	-0.277223	0.839	0.883	0
Msra	0	-0.522276	0.633	0.713	0
Dpp6	0	0.257537	0.995	0.964	0
Myo16	0	-0.422767	0.386	0.531	0
Tnik	0	-0.406571	0.87	0.854	0
B230334C09Rik	0	-0.353834	0.483	0.623	0
Wls	0	-0.296878	0.152	0.291	0
2610037D02Rik	0	0.336916	0.742	0.704	0
Nfia	0	-0.470764	0.227	0.388	0
Cox5a	0	-0.341541	0.518	0.677	0
Gm28376	0	-0.328342	0.228	0.378	0
9330182L06Rik	0	0.251557	0.727	0.657	0
Dgkg	0	-0.665388	0.406	0.515	0
Ctdspl	0	0.280248	0.803	0.729	0
Galnt18	0	-0.423232	0.416	0.563	0
Palmd	0	-0.274119	0.263	0.411	0
Nrp2	0	0.308396	0.499	0.377	0
Zfp804a	0	-0.619647	0.599	0.709	0
Oprm1	0	-0.349332	0.271	0.415	0
Reln	0	-0.590539	0.075	0.191	0
Itga8	0	-0.276347	0.097	0.224	0
Luzp1	0	-0.29997	0.595	0.718	0
Chst9	0	-0.392904	0.088	0.21	0
Celf2	0	-1.17986	0.993	0.964	0
Angpt1	0	-0.301524	0.059	0.172	0
Tango2	0	-0.26026	0.628	0.756	0
March11	0	-0.349036	0.444	0.584	0
Rgs6	0	-0.437252	0.54	0.699	0
Rab3a	0	-0.278269	0.434	0.598	0
Gm20642	0	-0.266157	0.815	0.873	0
Sntb2	0	-0.286327	0.357	0.506	0
Pigk	0	-0.372045	0.691	0.777	0
Ldlrad3	0	0.254776	0.55	0.447	0
Tpi1	0	-0.269413	0.416	0.586	0
Tmsb4x	0	-0.347476	0.402	0.566	0
Cnr1	0	-0.304946	0.172	0.31	0
Fth1	0	-0.444696	0.73	0.833	0
Pdgfc	0	-0.312349	0.311	0.45	0
Atp5b	0	-0.294161	0.563	0.709	0
Gabrb2	0	-0.502638	0.738	0.754	0
Lingo1	0	-0.255243	0.571	0.698	0
Lypd1	0	-0.269087	0.175	0.316	0
Diaph1	0	0.265036	0.6	0.533	0
Cep250	0	0.25355	0.512	0.428	0
Prkce	0	-0.309677	0.941	0.923	0
Gm4924	0	0.264202	0.574	0.496	0
Adra1a	0	0.331366	0.3	0.196	0
Sema5b	0	0.769682	0.294	0.196	0
St6galnac5	0	-0.465178	0.571	0.683	0
Stxbp5l	0	-0.414169	0.878	0.865	0
Dnm1	0	-0.25339	0.77	0.851	0
Prkd1	0	-0.330932	0.193	0.325	0
Atp6v1e1	0	-0.252078	0.454	0.613	0
Cntnap5b	0	-0.698905	0.62	0.699	0
Glra3	0	0.473184	0.593	0.493	0
Caly	0	0.251	0.705	0.647	0
Lef1	0	-0.771724	0.025	0.111	0
Aldoa	0	-0.36565	0.719	0.82	0
Sh3rf3	0	-0.341162	0.593	0.698	0
6530403H02Rik	0	-0.88145	0.177	0.29	0
Pcp4	0	-0.422911	0.342	0.487	0
Gabra1	0	-0.340301	0.401	0.53	0
Cers6	0	-0.296094	0.696	0.779	0
Zfp804b	0	-1.05498	0.351	0.482	0
Alk	0	-0.526215	0.335	0.462	0
Tlk1	0	0.259704	0.745	0.711	0
Gm42439	0	-0.254707	0.505	0.638	0
Rb1	0	0.252563	0.783	0.754	0
Hs6st3	0	-0.295747	0.606	0.703	0
Fbn2	0	0.384796	0.16	0.082	0
Epha3	0	-0.362651	0.401	0.534	0
Auts2	0	-0.29914	0.978	0.96	0
Rapgef2	0	-0.283286	0.79	0.847	0
Sox6	0	-0.964805	0.265	0.361	0
Homer1	0	-0.384212	0.554	0.669	0
Pdzd2	0	-0.305912	0.272	0.413	0
Ywhaz	0	-0.258433	0.741	0.817	0
Itgbl1	0	-0.262301	0.274	0.411	0
Chrm2	0	-0.417336	0.146	0.266	0
Tacc1	0	-0.251348	0.647	0.761	0
Gpr137c	0	0.280302	0.728	0.647	0
Map3k5	0	-0.256892	0.457	0.592	0
Nxpe4	0	-0.263925	0.488	0.63	0
Gm15398	0	0.377172	0.697	0.627	0
AC159282.1	0	0.276432	0.4	0.299	0
Sema3e	0	-0.399425	0.14	0.253	0
Htr4	0	-0.295159	0.197	0.318	0
Rgl1	0	-0.323539	0.611	0.699	0
Gpc3	0	-0.257526	0.054	0.147	0
Ywhah	0	-0.272522	0.588	0.717	0
Adam23	0	-0.26493	0.838	0.876	0
Cadm2	0	-0.342758	0.994	0.981	0
Man1a2	0	-0.251124	0.736	0.807	0
Atp5g1	0	-0.27155	0.485	0.63	0
Atp2a2	0	-0.336407	0.714	0.797	0
Scn1a	0	-0.351379	0.822	0.85	0
Ckb	0	-0.368194	0.751	0.831	0
Pou6f2	0	-0.454242	0.206	0.332	0
Peak1	0	-0.310827	0.8	0.854	0
Ttr	0	-0.504289	0.26	0.396	0
Pkm	0	-0.297106	0.649	0.761	0
Dynll1	0	-0.263189	0.463	0.609	0
Klhl2	0	-0.325876	0.534	0.652	0
Arhgap32	0	-0.27135	0.791	0.831	0
Gm48091	0	-0.298465	0.486	0.597	0
Rbfox3	0	-0.25944	0.818	0.854	0
Zfp423	0	-0.273753	0.402	0.529	0
Cplx1	0	-0.31198	0.505	0.638	0
Clybl	0	0.325727	0.601	0.554	0
Large1	0	-0.263596	0.96	0.945	0
Ptprj	0	-0.39724	0.761	0.818	0
Mt3	0	-0.279567	0.506	0.653	0
Cap2	0	-0.287613	0.665	0.742	0
Slc25a4	0	-0.309103	0.682	0.783	0
Wdpcp	0	0.264744	0.577	0.529	0
Smarca2	0	-0.275918	0.631	0.722	0
Astn2	0	-0.358534	0.819	0.859	0
Gsdme	0	-0.328632	0.621	0.7	0
Col11a1	0	0.563365	0.364	0.271	0
Car2	0	-0.254202	0.188	0.308	0
Slc9a9	0	-0.406249	0.646	0.715	0
Ptprm	0	-0.74669	0.372	0.455	0
Olfm3	0	-0.431378	0.519	0.594	0
Car10	0	-0.688276	0.593	0.624	0
Asap1	0	-0.322731	0.757	0.819	0
Fut9	0	-0.310735	0.682	0.764	0
Stmn3	0	-0.258979	0.863	0.902	0
D430041D05Rik	0	-0.308737	0.803	0.819	0
Shank2	0	-0.258332	0.793	0.822	0
Actb	0	-0.371901	0.805	0.866	0
Prkcd	0	-0.476522	0.065	0.145	0
Syt9	0	0.357556	0.533	0.447	0
Ndufa4	0	-0.290307	0.548	0.674	0
Gm1604a	0	-0.259287	0.331	0.437	0
Ndnf	0	-0.312038	0.089	0.17	0
Prkag2	0	-0.325787	0.683	0.743	0
Kif26b	0	-0.280167	0.596	0.697	0
Mdh1	0	-0.286043	0.761	0.842	0
Nwd2	0	-0.663873	0.614	0.657	0
Pcsk5	0	-0.392959	0.217	0.315	0
Gria3	0	-0.306693	0.912	0.881	0
Brinp2	0	-0.304448	0.568	0.658	0
Tac1	0	-0.259901	0.043	0.11	0
Tmem163	0	-0.304776	0.378	0.482	0
Rora	0	-0.326464	0.951	0.946	0
Gm26848	0	-0.298094	0.996	0.97	0
Grik1	0	-0.747753	0.43	0.501	0
Lin7a	0	-0.265607	0.625	0.708	0
Zfp697	0	-0.260766	0.504	0.612	0
Mgat4c	0	-0.68773	0.817	0.838	0
Eml1	0	-0.262243	0.418	0.52	0
Ubb	0	-0.313846	0.894	0.928	0
Camk4	0	-0.35303	0.711	0.748	0
Cpe	0	-0.293001	0.893	0.897	0
Atp1a2	0	-0.278545	0.055	0.125	0
Col25a1	0	-0.5047	0.481	0.581	0
Pitpnc1	0	-0.609747	0.601	0.646	0
Gm26883	0	-0.313607	0.176	0.267	0
Grm3	0	-0.499909	0.44	0.528	0
Sntg2	0	-0.375124	0.177	0.268	0
Hsp90ab1	0	-0.2792	0.781	0.841	0
Ildr2	0	-0.371045	0.525	0.583	0
Cox8a	0	-0.256157	0.671	0.77	0
Rfx3	0	-0.600991	0.739	0.781	0
Rorb	0	-0.717623	0.173	0.25	0
Hs3st5	0	-0.265995	0.695	0.574	0
Trhde	0	-0.370464	0.252	0.342	0
Rnf220	0	-0.877002	0.459	0.554	0
Inpp4b	0	0.389756	0.823	0.803	0
Slc44a5	0	0.257973	0.64	0.583	0
Ppia	0	-0.250068	0.708	0.793	0
Fam19a1	0	-1.03834	0.596	0.631	0
Syt7	0	-0.255566	0.745	0.757	0
Slc24a2	0	-0.571952	0.882	0.852	0
Bcl11a	0	0.259663	0.526	0.469	0
Synpo2	0	-0.860767	0.114	0.179	0
Ebf2	0	-0.445421	0.05	0.104	0
Ralyl	0	-0.261471	0.984	0.953	0
9530026P05Rik	0	0.429765	0.389	0.334	0
Cntn6	0	-0.351479	0.596	0.634	0
Serpine2	0	-0.275155	0.343	0.43	0
Tshz2	0	-0.492157	0.268	0.347	0
Dlgap2	0	-0.543388	0.864	0.799	0
Clmn	0	-0.347354	0.318	0.399	0
Il1rapl2	0	0.658527	0.655	0.615	0
Ptprz1	0	-0.470855	0.733	0.747	0
Sntb1	0	0.27524	0.306	0.245	0
Dgkb	0	-0.379608	0.962	0.926	0
Syt2	0	-0.29633	0.181	0.252	0
Plcl1	0	-0.276713	0.681	0.764	0
Gabra4	0	-0.367448	0.523	0.592	0
Phlpp1	0	-0.301161	0.756	0.81	0
Apoe	0	-0.370933	0.221	0.309	0
Frmd5	0	-0.367119	0.715	0.763	0
Qk	0	-0.567327	0.65	0.709	0
Dab1	0	-0.260641	0.959	0.887	0
Slc6a1	0	-0.2696	0.311	0.376	0
Ptgds	0	-0.542317	0.233	0.315	0
Kcnq5	0	-0.957246	0.69	0.688	0
Gabrg1	0	-0.338674	0.213	0.268	0
Unc5d	0	0.297091	0.652	0.624	0
Cit	0	-0.387296	0.849	0.85	0
March1	0	-0.311237	0.861	0.853	0
Tnr	0	-0.335293	0.77	0.783	0
Cul4b	0	0.250396	0.34	0.316	0
Tmtc2	0	-0.260091	0.535	0.601	0
Grm7	0	-0.419072	0.916	0.828	0
mt-Co1	0	-0.314346	0.538	0.623	0
Nxph1	0	-1.41666	0.454	0.458	0
Npas3	0	-0.927158	0.659	0.642	0
Opcml	0	-0.362271	0.964	0.936	0
Lix1	0	-0.274217	0.369	0.423	0
Nell2	0	-0.33221	0.836	0.803	0
Mbp	0	-0.424277	0.384	0.452	0
Dpyd	0	-0.40337	0.773	0.755	0
Chrm3	0	-0.413936	0.513	0.548	0
Dlc1	0	-0.260397	0.678	0.693	0
Stxbp6	0	-0.324087	0.267	0.3	0
Cacna1c	0	-0.276121	0.974	0.939	0
Pde11a	0	-0.285909	0.225	0.263	0
Pdzrn3	0	-0.466012	0.256	0.293	0
mt-Co3	0	-0.30017	0.509	0.576	0
Cdh4	0	0.275369	0.694	0.695	0
Grip1	0	-0.411144	0.964	0.929	0
Plp1	0	-0.740761	0.268	0.316	0
Ptpn4	0	-0.287891	0.811	0.829	0
Cald1	0	0.327198	0.277	0.273	0
Kcnd2	0	-0.294382	0.959	0.911	0
Grid2	0	-0.267534	0.885	0.873	0
5730522E02Rik	0	-0.344068	0.745	0.741	0
Sema6a	0	-0.276045	0.413	0.419	0
Kcnt2	0	-0.375714	0.589	0.492	1
Sh3d19	0	-0.253748	0.667	0.652	1
Phactr1	0	-0.587805	0.964	0.856	1
Kcnh7	0	-0.460589	0.783	0.661	1
Gpc5	0	-0.705158	0.499	0.489	1
Xylt1	0	-0.266915	0.705	0.694	1
Adamtsl1	1	-0.327579	0.563	0.542	1
Gabrg3	1	-0.297321	0.754	0.664	1
Cdh9	1	-0.299245	0.522	0.491	1
Elmo1	1	-0.276592	0.713	0.694	1

## Sheet: c_5
Column1	p_val	avg_log2FC	pct.1	pct.2	p_val_adj
Xkr4	0	0.470798	0.985	0.967	0
Oprk1	0	-0.516821	0.049	0.327	0
Kcnb2	0	-1.0132	0.907	0.913	0
Paqr8	0	0.274175	0.582	0.232	0
Kcnq5	0	-1.43354	0.494	0.701	0
Ogfrl1	0	0.706776	0.858	0.429	0
Gm28822	0	0.505018	0.357	0.005	0
Adgrb3	0	-0.537709	0.985	0.977	0
Tmem131	0	0.992062	0.947	0.719	0
Npas2	0	1.08451	0.892	0.368	0
Gulp1	0	0.588233	0.57	0.247	0
Myo1b	0	0.932446	0.773	0.168	0
Gls	0	0.340206	0.98	0.932	0
Nab1	0	0.254377	0.58	0.281	0
1700019D03Rik	0	0.660649	0.764	0.241	0
Hecw2	0	0.645058	0.975	0.901	0
Plcl1	0	-1.71719	0.434	0.773	0
Orc2	0	0.354854	0.853	0.614	0
Fam126b	0	0.452756	0.92	0.701	0
Zdbf2	0	-0.706489	0.225	0.563	0
Adam23	0	0.396848	0.971	0.864	0
Map2	0	-1.04201	0.967	0.968	0
Unc80	0	0.846844	0.987	0.946	0
Erbb4	0	-3.73258	0.328	0.738	0
March4	0	-1.13595	0.376	0.692	0
Speg	0	-0.469377	0.288	0.568	0
Epha4	0	1.35133	0.965	0.546	0
Sgpp2	0	0.710867	0.844	0.344	0
Acsl3	0	0.391312	0.788	0.483	0
Nyap2	0	-1.25988	0.657	0.859	0
Agfg1	0	0.63075	0.927	0.717	0
2810459M11Rik	0	0.266667	0.274	0.091	0
Dgkd	0	-0.566622	0.589	0.733	0
Agap1	0	-0.594968	0.89	0.904	0
Ndufa10	0	0.429968	0.859	0.594	0
Bok	0	0.294924	0.427	0.081	0
Pam	0	-0.806183	0.931	0.917	0
Rnf152	0	0.663156	0.813	0.343	0
Tnfrsf11a	0	0.513275	0.595	0.122	0
Phlpp1	0	0.381038	0.941	0.794	0
9330185C12Rik	0	1.13104	0.55	0.029	0
Cntnap5a	0	-1.58831	0.761	0.862	0
Ptpn4	0	2.03814	0.98	0.817	0
En1	0	-0.667785	0.031	0.348	0
Dpp10	0	0.485333	0.982	0.897	0
Mgat5	0	0.792086	0.929	0.697	0
Tmem163	0	1.00947	0.93	0.439	0
Nfasc	0	0.422465	0.964	0.875	0
Lrrn2	0	0.710264	0.922	0.656	0
Atp2b4	0	-0.861182	0.14	0.578	0
Nav1	0	-0.59382	0.874	0.881	0
Lhx9	0	0.286271	0.362	0.035	0
1700025G04Rik	0	-0.578195	0.624	0.764	0
Rgl1	0	-0.750051	0.519	0.698	0
Nmnat2	0	0.574271	0.969	0.882	0
Rgs8	0	0.635751	0.765	0.321	0
Rgs16	0	0.630252	0.626	0.032	0
Cacna1e	0	-2.16444	0.379	0.917	0
Fam163a	0	0.546444	0.602	0.093	0
Brinp2	0	0.645057	0.932	0.628	0
Rabgap1l	0	-0.433548	0.96	0.948	0
Dcaf6	0	0.548795	0.96	0.834	0
Rcsd1	0	0.272675	0.327	0.011	0
Creg1	0	0.416361	0.522	0.113	0
Pou2f1	0	0.544007	0.894	0.699	0
Ildr2	0	1.72037	0.957	0.551	0
Mgst3	0	0.360816	0.704	0.36	0
Lmx1a	0	-0.762571	0.029	0.319	0
Pbx1	0	-1.69038	0.971	0.963	0
Rgs4	0	0.620007	0.659	0.177	0
Pcp4l1	0	0.465184	0.59	0.135	0
Kcnj9	0	0.603445	0.751	0.243	0
Rgs7	0	0.457588	0.979	0.947	0
Opn3	0	0.356589	0.46	0.092	0
Pld5	0	-1.02207	0.129	0.43	0
Smyd3	0	-1.00299	0.85	0.918	0
Cdc42bpa	0	0.648553	0.981	0.933	0
Stum	0	0.377425	0.607	0.271	0
Enah	0	0.580872	0.979	0.932	0
Prox1	0	1.06779	0.824	0.056	0
Kcnh1	0	-0.700804	0.11	0.415	0
Fam171a1	0	-0.506471	0.495	0.673	0
Frmd4a	0	1.15529	0.99	0.967	0
1700080N15Rik	0	0.439003	0.726	0.399	0
Camk1d	0	0.790077	0.99	0.945	0
Nebl	0	-1.39812	0.443	0.827	0
Etl4	0	0.582021	0.964	0.802	0
Gpr158	0	-0.98341	0.966	0.948	0
Nsmf	0	1.01775	0.933	0.564	0
Grin1	0	0.551773	0.976	0.861	0
Nacc2	0	0.34177	0.58	0.186	0
Miga2	0	0.358058	0.819	0.549	0
Fnbp1	0	0.541583	0.965	0.842	0
Lmx1b	0	-0.691994	0.038	0.387	0
Pbx3	0	-2.24814	0.4	0.717	0
C79798	0	-0.489805	0.063	0.338	0
Scai	0	0.495016	0.946	0.84	0
Cacnb4	0	1.18474	0.98	0.88	0
Fmnl2	0	-0.92942	0.744	0.877	0
Galnt13	0	-0.624261	0.838	0.907	0
Kcnj3	0	0.836342	0.967	0.701	0
Nr4a2	0	-0.695848	0.091	0.435	0
Acvr1c	0	0.404457	0.549	0.136	0
Tanc1	0	1.45667	0.94	0.315	0
Rbms1	0	1.00733	0.95	0.557	0
Slc4a10	0	0.48375	0.974	0.886	0
Fign	0	1.39308	0.883	0.174	0
Grb14	0	0.502468	0.844	0.462	0
Scn3a	0	-0.790283	0.807	0.851	0
Scn1a	0	0.685297	0.972	0.838	0
Gm13629	0	0.622594	0.885	0.496	0
Rapgef4	0	-1.40587	0.54	0.918	0
Rapgef4os1	0	-0.540897	0.21	0.54	0
Osbpl6	0	0.492065	0.966	0.797	0
Ccdc141	0	0.947035	0.639	0.095	0
Sestd1	0	0.701325	0.925	0.667	0
Zfp385b	0	1.39692	0.958	0.604	0
Gm13944	0	0.597155	0.69	0.283	0
Ube2e3	0	0.300634	0.724	0.382	0
Pde1a	0	-2.33748	0.291	0.796	0
Zfp804a	0	1.72799	0.963	0.678	0
Ptprj	0	1.62498	0.968	0.801	0
4933423P22Rik	0	0.375321	0.5	0.133	0
C1qtnf4	0	0.58175	0.842	0.413	0
Celf1	0	0.376491	0.969	0.882	0
Lrrc4c	0	-1.81945	0.91	0.956	0
Mpped2	0	-0.884801	0.683	0.77	0
Kcna4	0	0.504077	0.706	0.258	0
Lgr4	0	0.506553	0.851	0.567	0
Ano3	0	-0.988757	0.234	0.506	0
Ryr3	0	1.35086	0.973	0.837	0
Rasgrp1	0	1.06774	0.875	0.314	0
Pak6	0	-0.353361	0.08	0.367	0
Stard9	0	0.478578	0.833	0.489	0
Frmd5	0	0.653108	0.971	0.743	0
Sema6d	0	-1.51402	0.778	0.816	0
Secisbp2l	0	0.871567	0.893	0.512	0
Slc23a2	0	0.500524	0.939	0.756	0
Plcb1	0	-2.06745	0.579	0.916	0
9630028H03Rik	0	-0.657361	0.184	0.534	0
Plcb4	0	1.10035	0.979	0.719	0
Btbd3	0	0.356084	0.779	0.469	0
Pcsk2	0	0.898494	0.976	0.855	0
Slc24a3	0	0.763311	0.977	0.891	0
9030622O22Rik	0	-1.28407	0.025	0.357	0
Syndig1	0	0.722358	0.836	0.318	0
Necab3	0	0.428908	0.655	0.317	0
Ggt7	0	0.517368	0.897	0.647	0
Acss2	0	0.380061	0.852	0.599	0
Gss	0	0.260902	0.556	0.271	0
Epb41l1	0	-1.13623	0.443	0.858	0
Dlgap4	0	0.738296	0.95	0.763	0
Nnat	0	-1.43389	0.5	0.702	0
Ptprt	0	-1.57528	0.249	0.507	0
Cdh22	0	-0.457643	0.096	0.415	0
Tshz2	0	1.30905	0.851	0.304	0
Gm26883	0	0.977164	0.765	0.223	0
Phactr3	0	0.518094	0.939	0.778	0
Hrh3	0	0.375287	0.558	0.143	0
Ntsr1	0	-0.492452	0.027	0.307	0
Shroom4	0	0.383575	0.528	0.187	0
Atp6ap2	0	0.380646	0.814	0.544	0
Tmem255a	0	-0.813501	0.102	0.504	0
Smarca1	0	-0.576078	0.422	0.65	0
Fgf13	0	0.891434	0.963	0.754	0
Mcf2	0	0.62514	0.699	0.209	0
Atp11c	0	0.75263	0.883	0.53	0
Dmd	0	-1.42946	0.887	0.958	0
Il1rapl1	0	1.48057	0.991	0.911	0
Eda	0	-0.800572	0.189	0.487	0
Nhsl2	0	0.518914	0.847	0.551	0
Ftx	0	-0.648736	0.877	0.904	0
Nexmif	0	-0.977442	0.619	0.812	0
Frmpd3	0	-0.765413	0.08	0.527	0
Tmem164	0	0.491877	0.884	0.575	0
Pak3	0	-0.6884	0.92	0.924	0
Dcx	0	-0.509665	0.295	0.602	0
Smpx	0	0.251024	0.332	0.049	0
Cnksr2	0	-0.883395	0.888	0.858	0
Cdkl5	0	1.39642	0.951	0.618	0
Nhs	0	-1.0803	0.193	0.598	0
Reps2	0	0.549013	0.949	0.759	0
Gpm6b	0	-1.26358	0.343	0.723	0
Frmpd4	0	0.569635	0.978	0.774	0
Arhgap6	0	-1.08027	0.315	0.584	0
Gm15261	0	-0.560294	0.05	0.335	0
Pkia	0	-0.661672	0.748	0.835	0
Pag1	0	0.49192	0.843	0.517	0
Mir124-2hg	0	0.701058	0.943	0.649	0
Nlgn1	0	-0.857908	0.987	0.985	0
Egfem1	0	0.661615	0.96	0.593	0
Pex5l	0	0.328849	0.961	0.81	0
Ttc14	0	0.453802	0.981	0.91	0
Trpc3	0	1.48161	0.906	0.129	0
Fat4	0	-0.482616	0.045	0.378	0
Lhfp	0	2.11535	0.939	0.379	0
Trpc4	0	-0.864128	0.082	0.45	0
Dclk1	0	-0.683959	0.965	0.952	0
Wwtr1	0	0.330065	0.366	0.055	0
Gpr149	0	0.464252	0.437	0.076	0
Plch1	0	0.326983	0.503	0.213	0
Kcnab1	0	1.0409	0.966	0.56	0
A330015K06Rik	0	0.663548	0.853	0.379	0
Tiparp	0	0.304972	0.51	0.148	0
Shox2	0	0.677166	0.656	0.025	0
Rsrc1	0	0.889701	0.963	0.76	0
Ppm1l	0	0.642243	0.946	0.777	0
Sptssb	0	0.342522	0.418	0.048	0
Gm20754	0	0.333386	0.841	0.476	0
Serpini1	0	-0.81175	0.251	0.585	0
Gria2	0	-0.822549	0.987	0.974	0
Pdgfc	0	-0.603473	0.173	0.449	0
Tmem131l	0	-0.46366	0.252	0.523	0
Trim2	0	-0.626715	0.915	0.92	0
Fhdc1	0	0.562199	0.593	0.075	0
Sh3d19	0	2.17544	0.963	0.634	0
Arhgef2	0	0.273969	0.674	0.364	0
Bcl9	0	-0.714083	0.309	0.664	0
Man1a2	0	0.660598	0.955	0.787	0
Vangl1	0	1.04596	0.805	0.066	0
Ngf	0	0.311155	0.399	0.041	0
Magi3	0	-0.642494	0.792	0.83	0
Kcna2	0	0.397457	0.739	0.375	0
Slc6a17	0	0.680498	0.92	0.599	0
Vav3	0	3.01477	0.978	0.439	0
Ntng1	0	2.62726	0.995	0.666	0
Olfm3	0	0.787266	0.936	0.562	0
Palmd	0	-0.601205	0.058	0.413	0
Dpyd	0	-1.52157	0.521	0.772	0
Tmem56	0	0.494927	0.724	0.342	0
Fnbp1l	0	-1.09837	0.268	0.769	0
Synpo2	0	3.63698	0.979	0.119	0
Ndst3	0	-1.2003	0.31	0.605	0
Ank2	0	-0.56238	0.984	0.982	0
Alpk1	0	0.364996	0.439	0.053	0
Lef1	0	3.32199	0.96	0.044	0
Manba	0	0.477645	0.772	0.424	0
Rap1gds1	0	0.452191	0.966	0.853	0
Unc5c	0	0.835024	0.977	0.918	0
Pdlim5	0	0.38276	0.605	0.262	0
Nexn	0	0.927103	0.774	0.161	0
St6galnac3	0	-1.38827	0.34	0.791	0
Slc44a5	0	-1.27566	0.144	0.619	0
B230334C09Rik	0	1.54776	0.958	0.582	0
Lrrc7	0	1.62437	0.992	0.953	0
Gm20752	0	0.568281	0.504	0.075	0
Wls	0	0.706043	0.74	0.243	0
Fam110b	0	0.953532	0.941	0.68	0
Tox	0	1.28099	0.898	0.458	0
Clvs1	0	0.71959	0.965	0.844	0
Pdp1	0	1.08932	0.888	0.337	0
Mmp16	0	-0.981949	0.894	0.917	0
Nkain3	0	-1.954	0.304	0.759	0
Gpr63	0	0.914462	0.826	0.277	0
Fut9	0	0.602742	0.95	0.741	0
Epha7	0	0.879488	0.906	0.562	0
Gm2163	0	0.417741	0.917	0.717	0
4930578G10Rik	0	0.596651	0.873	0.576	0
Phf24	0	0.401714	0.923	0.702	0
Gabbr2	0	1.3729	0.979	0.882	0
Tmeff1	0	-0.549252	0.17	0.488	0
Frrs1l	0	0.369242	0.811	0.52	0
Ptpn3	0	2.46884	0.96	0.368	0
Gm12536	0	0.623271	0.586	0.079	0
Zfp618	0	-0.668612	0.481	0.677	0
Tnc	0	0.260962	0.16	0.015	0
Astn2	0	1.12989	0.979	0.846	0
Brinp1	0	0.74287	0.97	0.801	0
Megf9	0	1.03181	0.941	0.681	0
Ptprd	0	0.395249	0.994	0.972	0
Ttc39b	0	0.369494	0.791	0.486	0
Ccdc171	0	-0.752314	0.19	0.531	0
Bnc2	0	-1.40246	0.095	0.38	0
Sh3gl2	0	0.730587	0.97	0.844	0
Slc24a2	0	1.18385	0.98	0.848	0
Hook1	0	0.367658	0.888	0.695	0
Patj	0	1.20261	0.937	0.568	0
Raver2	0	0.710692	0.876	0.424	0
Pde4b	0	-1.00105	0.59	0.89	0
Dab1	0	-2.6627	0.352	0.931	0
Eps15	0	0.473719	0.87	0.586	0
Atpaf1	0	0.471309	0.795	0.516	0
Zswim5	0	-0.683136	0.47	0.654	0
Rnf220	0	2.66679	0.982	0.513	0
Gm12828	0	0.308556	0.4	0.01	0
Ptprf	0	-0.605862	0.236	0.601	0
Hivep3	0	0.801822	0.968	0.871	0
Scmh1	0	-0.502912	0.865	0.89	0
Rims3	0	0.719287	0.872	0.374	0
Grik3	0	-1.36951	0.32	0.632	0
Ncdn	0	0.377311	0.846	0.561	0
Csmd2	0	-1.67037	0.436	0.886	0
Trnp1	0	0.573234	0.804	0.343	0
Luzp1	0	0.431949	0.905	0.689	0
Rap1gap	0	0.605627	0.905	0.626	0
Camta1	0	0.391554	0.979	0.933	0
Rnf207	0	0.299832	0.492	0.151	0
Plch2	0	0.506155	0.678	0.194	0
Gabrd	0	1.07973	0.785	0.073	0
Cfap74	0	0.765575	0.726	0.215	0
Gm3510	0	0.39671	0.474	0.155	0
Magi2	0	0.550361	0.991	0.981	0
Napepld	0	0.964961	0.85	0.301	0
Lhfpl3	0	0.6941	0.977	0.812	0
Srpk2	0	0.339269	0.973	0.921	0
Prkag2	0	0.630532	0.932	0.722	0
Fndc4	0	0.346598	0.691	0.357	0
Ywhah	0	0.524029	0.912	0.687	0
Zfyve28	0	0.519947	0.879	0.553	0
Afap1	0	0.33719	0.655	0.286	0
Sorcs2	0	0.810776	0.89	0.517	0
Hs3st1	0	0.389311	0.512	0.19	0
Ldb2	0	-0.879124	0.301	0.602	0
Lcorl	0	-0.885272	0.51	0.756	0
Slit2	0	-1.59211	0.146	0.696	0
Kcnip4	0	2.05833	1	0.97	0
Ppargc1a	0	0.476847	0.744	0.484	0
Sel1l3	0	1.07281	0.898	0.276	0
Arap2	0	0.520617	0.848	0.513	0
Nwd2	0	-1.68106	0.287	0.674	0
Rell1	0	0.639789	0.642	0.124	0
Apbb2	0	1.17584	0.977	0.893	0
Atp8a1	0	-1.43571	0.371	0.868	0
Gm15478	0	-0.437265	0.089	0.384	0
Cox7b2	0	0.684407	0.582	0.08	0
Gabra4	0	2.08683	0.97	0.559	0
Gm38562	0	0.40823	0.464	0.05	0
Fryl	0	1.34324	0.972	0.792	0
Ociad2	0	0.525696	0.807	0.405	0
Cwh43	0	0.499436	0.479	0.048	0
C530008M17Rik	0	0.458305	0.932	0.632	0
Epha5	0	-1.55564	0.856	0.921	0
Slc4a4	0	1.13402	0.811	0.251	0
Parm1	0	-0.771423	0.064	0.455	0
Fras1	0	1.55595	0.88	0.435	0
Prkg2	0	0.587783	0.753	0.293	0
Cds1	0	0.304066	0.678	0.36	0
Galnt9	0	0.8623	0.896	0.395	0
Ttc28	0	-1.36872	0.233	0.752	0
Wscd2	0	-0.716788	0.08	0.554	0
Fam222a	0	0.262304	0.454	0.12	0
Cit	0	2.22826	0.988	0.841	0
Srrm4os	0	0.628824	0.74	0.265	0
Srrm4	0	1.36998	0.977	0.713	0
Cux2	0	0.553207	0.935	0.615	0
Atp2a2	0	1.4455	0.973	0.774	0
Scarb1	0	-0.391517	0.096	0.39	0
Tmem132c	0	0.421817	0.623	0.211	0
Caln1	0	-1.96306	0.256	0.818	0
Galnt17	0	1.34978	0.973	0.662	0
Auts2	0	0.786653	0.989	0.96	0
Gm42439	0	0.49217	0.888	0.604	0
Gtf2ird1	0	0.396001	0.915	0.717	0
Hip1	0	-0.499527	0.177	0.462	0
Rasa4	0	0.33848	0.51	0.125	0
Col26a1	0	0.758883	0.767	0.181	0
Fam20c	0	0.487019	0.706	0.302	0
Sdk1	0	-1.63497	0.58	0.739	0
Grid2ip	0	0.691943	0.676	0.029	0
Gm20635	0	0.39855	0.51	0.066	0
Flt3	0	0.758226	0.8	0.316	0
Medag	0	0.320037	0.422	0.042	0
B3glct	0	0.485835	0.795	0.397	0
Thsd7a	0	0.785935	0.914	0.679	0
Gm4876	0	-0.77775	0.146	0.473	0
Cttnbp2	0	1.28842	0.981	0.873	0
Gm15594	0	0.315145	0.547	0.195	0
Kcnd2	0	1.22796	0.987	0.913	0
Tspan12	0	0.360276	0.534	0.173	0
Cadps2	0	-2.57406	0.301	0.753	0
Gm3294	0	0.320895	0.49	0.147	0
Ccdc136	0	1.42969	0.966	0.646	0
Tspan33	0	0.740145	0.835	0.39	0
Lncpint	0	-0.423086	0.979	0.963	0
Dgki	0	1.003	0.979	0.909	0
Creb3l2	0	0.322985	0.655	0.345	0
D630045J12Rik	0	0.797422	0.943	0.711	0
Dennd2a	0	-0.615838	0.062	0.472	0
Tmem178b	0	-0.908579	0.972	0.964	0
Mpp6	0	0.894316	0.934	0.617	0
Gsdme	0	0.885672	0.943	0.674	0
Osbpl3	0	1.31503	0.925	0.388	0
Jazf1	0	-0.541164	0.86	0.876	0
Mturn	0	0.292815	0.596	0.265	0
Fam13a	0	0.375535	0.755	0.441	0
Snca	0	-1.16224	0.482	0.761	0
Ccser1	0	-0.50618	0.98	0.965	0
St3gal5	0	0.354058	0.802	0.469	0
Ctnna2	0	0.565576	0.989	0.974	0
Lrrtm1	0	0.492684	0.711	0.295	0
Lrrtm4	0	-1.26068	0.744	0.888	0
Sfxn5	0	0.383849	0.867	0.596	0
Mgll	0	0.623807	0.705	0.266	0
Iqsec1	0	-0.573599	0.843	0.853	0
Prickle2	0	0.988103	0.981	0.939	0
Magi1	0	-1.17628	0.911	0.957	0
Fam19a1	0	-2.35124	0.442	0.639	0
Fam19a4	0	1.26245	0.727	0.072	0
Cntn3	0	0.982596	0.965	0.548	0
Chl1	0	-1.07042	0.596	0.834	0
Cntn6	0	0.553196	0.927	0.61	0
Cntn4	0	1.30734	0.97	0.751	0
Itpr1	0	0.387438	0.889	0.628	0
Grm7	0	0.93691	0.979	0.83	0
Srgap3	0	-1.36313	0.714	0.929	0
Cpne9	0	1.15181	0.869	0.134	0
Atp2b2	0	0.566791	0.973	0.883	0
Slc6a1	0	-0.608714	0.09	0.385	0
Rasgef1a	0	-0.58073	0.606	0.727	0
Ret	0	-1.01804	0.253	0.484	0
Cacna1c	0	1.79799	0.987	0.941	0
Lrtm2	0	0.388379	0.559	0.124	0
Erc1	0	0.392857	0.944	0.835	0
Iqsec3	0	-0.575087	0.42	0.655	0
Vamp1	0	0.26432	0.606	0.312	0
Kcna1	0	0.542682	0.749	0.33	0
Prmt8	0	0.680589	0.769	0.311	0
Tspan11	0	0.276416	0.291	0.005	0
Tspan9	0	0.424205	0.573	0.183	0
Grin2b	0	0.884906	0.987	0.955	0
Rerg	0	-0.749611	0.065	0.452	0
Ptpro	0	-0.990025	0.242	0.635	0
Lmo3	0	-1.05681	0.139	0.517	0
Ldhb	0	0.534713	0.911	0.667	0
Etnk1	0	0.353644	0.971	0.905	0
Sox5	0	1.52329	0.876	0.39	0
Sox5os4	0	0.667246	0.603	0.097	0
Far2	0	0.50915	0.867	0.595	0
Prkcg	0	0.451724	0.906	0.657	0
Gm44151	0	-0.616991	0.411	0.668	0
Tnnt1	0	0.414389	0.391	0.02	0
Zim1	0	-0.536152	0.042	0.347	0
Usp29	0	-0.935294	0.943	0.882	0
Psg16	0	0.271575	0.492	0.163	0
Cadm4	0	0.27587	0.632	0.318	0
Scn1b	0	0.470905	0.802	0.424	0
Chst8	0	0.769115	0.818	0.324	0
Pepd	0	0.272059	0.615	0.305	0
Tshz3	0	0.570116	0.827	0.349	0
Shank1	0	0.502135	0.948	0.793	0
Kcnc1	0	0.847984	0.914	0.531	0
Nav2	0	0.600464	0.98	0.95	0
Nell1	0	2.18135	0.972	0.515	0
Nell1os	0	0.671319	0.739	0.259	0
Ano5	0	0.870351	0.8	0.177	0
Slc17a6	0	1.09334	0.925	0.269	0
Gas2	0	0.467745	0.83	0.502	0
Luzp2	0	-1.00259	0.573	0.774	0
Gabrb3	0	-0.637806	0.973	0.952	0
Atp10a	0	0.546127	0.623	0.163	0
A230057D06Rik	0	-0.6516	0.968	0.96	0
Adamts17	0	0.497262	0.865	0.608	0
Igf1r	0	0.448847	0.935	0.755	0
Nr2f2	0	0.43735	0.676	0.264	0
Mctp2	0	1.38669	0.838	0.212	0
Akap13	0	0.319476	0.849	0.565	0
Ntrk3	0	-1.95618	0.347	0.894	0
Homer2	0	0.764636	0.888	0.568	0
Tm6sf1	0	0.324112	0.638	0.289	0
Arnt2	0	-0.883792	0.292	0.702	0
Me3	0	-1.24812	0.342	0.786	0
Dlg2	0	-1.33076	0.988	0.986	0
Tenm4	0	0.620621	0.976	0.837	0
Gdpd5	0	0.689578	0.756	0.209	0
Syt9	0	1.27015	0.879	0.431	0
Nrip3	0	0.768456	0.879	0.421	0
Scube2	0	0.733394	0.66	0.045	0
Mrvi1	0	0.921021	0.702	0.036	0
Arntl	0	0.555762	0.859	0.493	0
Spon1	0	0.568648	0.767	0.417	0
Sox6	0	-1.4425	0.093	0.365	0
Plekha7	0	0.461647	0.872	0.657	0
Xylt1	0	-1.10786	0.395	0.715	0
Syt17	0	-0.875212	0.226	0.584	0
Cacng3	0	-0.819031	0.296	0.596	0
Fus	0	0.33341	0.969	0.913	0
Gpr26	0	-0.355901	0.055	0.336	0
Dhx32	0	0.399681	0.783	0.473	0
Ptpre	0	-0.606804	0.302	0.601	0
Ebf3	0	-1.11291	0.036	0.347	0
Inpp5a	0	0.851903	0.91	0.544	0
Adgra1	0	0.862083	0.911	0.552	0
Kndc1	0	0.607586	0.87	0.469	0
Eps8l2	0	0.352658	0.365	0.033	0
Th	0	-1.20903	0.048	0.43	0
Osbpl5	0	0.29427	0.56	0.245	0
Shank2	0	0.70787	0.953	0.81	0
Plekhg1	0	3.27683	0.947	0.13	0
Syne1	0	0.527353	0.98	0.945	0
Cnksr3	0	1.50945	0.855	0.051	0
Sash1	0	1.19209	0.918	0.404	0
Gm48727	0	0.642183	0.724	0.197	0
Gm48749	0	0.739835	0.813	0.325	0
Samd5	0	1.40845	0.96	0.556	0
Grm1	0	2.65447	0.985	0.698	0
4930567K20Rik	0	0.930626	0.712	0.218	0
Phactr2	0	1.22081	0.937	0.483	0
Gm47710	0	0.465658	0.468	0.044	0
Map3k5	0	0.563427	0.865	0.556	0
Pde7b	0	2.16812	0.953	0.408	0
Ahi1	0	-1.22607	0.968	0.967	0
Sgk1	0	0.758287	0.904	0.562	0
Tmem200a	0	-0.643694	0.119	0.493	0
Tpd52l1	0	0.599501	0.697	0.277	0
Gm48094	0	0.316632	0.398	0.102	0
Nkain2	0	-1.27709	0.984	0.973	0
Scml4	0	-0.723014	0.07	0.48	0
Crybg1	0	0.420299	0.41	0.04	0
Slc35f1	0	-1.51633	0.781	0.847	0
Fam184a	0	-1.15527	0.67	0.758	0
Sh3rf3	0	-0.800841	0.438	0.701	0
Mcu	0	0.684125	0.935	0.747	0
Spock2	0	0.372246	0.94	0.801	0
Gm31763	0	0.35439	0.649	0.312	0
Reep3	0	0.375185	0.746	0.432	0
Arid5b	0	0.573952	0.93	0.675	0
Bicc1	0	0.579858	0.855	0.557	0
Pcdh15	0	-1.53527	0.92	0.879	0
Prmt2	0	-0.510601	0.331	0.589	0
Adarb1	0	2.11821	0.979	0.691	0
Tspear	0	0.805848	0.418	0.048	0
Trpm2	0	0.336623	0.65	0.292	0
Izumo4	0	-0.45749	0.248	0.524	0
Btbd11	0	0.411813	0.91	0.585	0
Syn3	0	-0.993266	0.662	0.818	0
Nt5dc3	0	0.336006	0.559	0.183	0
Ano4	0	0.453285	0.908	0.65	0
Anks1b	0	0.842792	0.992	0.977	0
Fgd6	0	0.257068	0.393	0.068	0
Tmcc3	0	1.14224	0.948	0.567	0
Socs2	0	0.39246	0.802	0.457	0
Atp2b1	0	2.07203	0.986	0.813	0
Kitl	0	1.9293	0.949	0.199	0
Mgat4c	0	-1.07003	0.692	0.844	0
Kcnc2	0	2.48271	0.968	0.785	0
Msrb3	0	0.614972	0.744	0.284	0
Tbc1d30	0	0.392278	0.736	0.426	0
Rassf3	0	1.23681	0.807	0.181	0
Gm35696	0	0.846693	0.59	0.014	0
Tbk1	0	0.359347	0.777	0.529	0
Ppm1h	0	0.403616	0.942	0.803	0
Gm15418	0	0.354367	0.447	0.079	0
Gas6	0	0.351977	0.709	0.405	0
Dlgap2	0	-2.41968	0.267	0.842	0
Csmd1	0	-0.847098	0.991	0.978	0
Agpat5	0	0.386317	0.775	0.474	0
Zmat4	0	2.55018	0.955	0.53	0
Chrnb3	0	-0.773193	0.018	0.324	0
Nrg1	0	-2.04133	0.914	0.925	0
Lonrf1	0	0.575983	0.737	0.284	0
Dlc1	0	0.888811	0.96	0.674	0
Zdhhc2	0	-0.670352	0.739	0.794	0
Mtus1	0	0.287883	0.683	0.365	0
Sorbs2	0	0.675586	0.983	0.923	0
Gm16351	0	0.604087	0.762	0.362	0
Stox2	0	1.58345	0.97	0.87	0
Tenm3	0	0.587001	0.957	0.669	0
Wdr17	0	-0.784725	0.609	0.74	0
Gpm6a	0	-0.639468	0.889	0.92	0
Glra3	0	-0.974664	0.165	0.528	0
Galntl6	0	-2.86371	0.809	0.911	0
Gm26905	0	-1.79711	0.384	0.713	0
Mfap3l	0	0.361647	0.692	0.37	0
Sh3rf1	0	-0.814556	0.304	0.676	0
Palld	0	0.328101	0.486	0.125	0
Spock3	0	1.27929	0.979	0.708	0
Cpe	0	0.409351	0.969	0.892	0
March1	0	-1.74858	0.531	0.875	0
Csgalnact1	0	0.880462	0.815	0.33	0
Large1	0	-0.549477	0.964	0.946	0
Smad1	0	0.343151	0.783	0.479	0
Inpp4b	0	1.93381	0.983	0.795	0
4921524J17Rik	0	0.465796	0.637	0.218	0
Zfp423	0	1.39932	0.95	0.485	0
Cx3cl1	0	0.400693	0.793	0.471	0
Ndrg4	0	0.848839	0.983	0.882	0
Nfat5	0	-0.572045	0.816	0.874	0
Phlpp2	0	-0.489667	0.529	0.7	0
Cntnap4	0	-1.61028	0.565	0.746	0
Vat1l	0	-0.918591	0.284	0.634	0
Cmip	0	-0.739478	0.873	0.911	0
Necab2	0	0.263249	0.566	0.234	0
Ccdc7b	0	0.260211	0.398	0.145	0
Lrrc3b	0	-0.982538	0.453	0.642	0
Kcnma1	0	0.464611	0.987	0.965	0
Zmiz1	0	-0.671664	0.326	0.623	0
Prkcd	0	2.63078	0.912	0.085	0
Ankrd28	0	-0.705805	0.626	0.797	0
Wapl	0	0.427302	0.919	0.764	0
Nrg3	0	0.569246	0.997	0.977	0
Nrg3os	0	0.537271	0.974	0.871	0
Sh2d4b	0	0.646095	0.557	0.053	0
Tspan14	0	0.733409	0.767	0.188	0
Samd4	0	-1.17196	0.261	0.698	0
Ktn1	0	0.402139	0.954	0.854	0
Peli2	0	0.410811	0.567	0.148	0
Slc35f4	0	-1.11929	0.334	0.684	0
Ndrg2	0	0.493492	0.741	0.281	0
Slc7a8	0	0.521089	0.831	0.494	0
Zdhhc20	0	-0.670125	0.711	0.83	0
Fgf9	0	0.250552	0.514	0.205	0
Atp8a2	0	0.452339	0.967	0.884	0
Sacs	0	0.535347	0.865	0.566	0
Xkr6	0	-1.84496	0.181	0.82	0
Mir124a-1hg	0	0.801087	0.971	0.802	0
Extl3	0	0.435117	0.801	0.542	0
Ptk2b	0	0.27701	0.757	0.311	0
Stmn4	0	0.302498	0.736	0.388	0
Nefm	0	0.595264	0.759	0.306	0
Nefl	0	0.313984	0.742	0.409	0
Slc25a37	0	0.809604	0.773	0.216	0
Lgi3	0	0.314509	0.609	0.255	0
Fndc3a	0	-0.868609	0.666	0.779	0
Lrch1	0	1.26512	0.97	0.78	0
Epsti1	0	0.542821	0.3	0.021	0
Dgkh	0	0.448599	0.948	0.792	0
Pcdh9	0	0.861802	0.994	0.958	0
Klhl1	0	-2.90772	0.146	0.659	0
Klf12	0	0.5136	0.962	0.824	0
Mycbp2	0	-0.339972	0.984	0.972	0
Slitrk6	0	0.387657	0.464	0.023	0
Gpc6	0	-1.66988	0.557	0.776	0
Hs6st3	0	0.854853	0.971	0.672	0
Trpc6	0	-1.2081	0.168	0.533	0
Arhgap42	0	0.59647	0.773	0.394	0
Maml2	0	-0.924185	0.173	0.483	0
Amotl1	0	1.0475	0.927	0.457	0
Igsf9b	0	0.747528	0.927	0.604	0
Adamts15	0	0.333111	0.394	0.028	0
Aplp2	0	0.518747	0.935	0.757	0
Arhgap32	0	0.827648	0.966	0.817	0
St3gal4	0	0.811528	0.776	0.328	0
Pknox2	0	-0.726057	0.468	0.687	0
Scn3b	0	-0.539917	0.235	0.562	0
Ubash3b	0	-0.851303	0.102	0.514	0
Sorl1	0	-0.549544	0.402	0.617	0
Thy1	0	0.574278	0.875	0.484	0
Usp2	0	0.299332	0.623	0.278	0
Sik3	0	0.360103	0.97	0.92	0
Cadm1	0	-1.51794	0.814	0.902	0
Drd2	0	-1.0234	0.111	0.384	0
Ncam1	0	-1.284	0.936	0.965	0
Dixdc1	0	0.395376	0.816	0.483	0
AI593442	0	0.578167	0.738	0.26	0
Peak1	0	1.02478	0.973	0.839	0
Sema7a	0	0.283531	0.463	0.152	0
Coro2b	0	0.59111	0.869	0.51	0
Herc1	0	0.497928	0.973	0.92	0
Tln2	0	0.736386	0.946	0.76	0
Rora	0	1.64661	0.991	0.944	0
Gm15511	0	0.335459	0.451	0.063	0
Unc13c	0	0.399731	0.828	0.417	0
Ick	0	0.620887	0.774	0.38	0
Sh3bgrl2	0	0.878013	0.819	0.25	0
Rasgrf1	0	0.404898	0.961	0.623	0
Zic1	0	0.878276	0.749	0.039	0
Zic4	0	0.429466	0.478	0.014	0
Slc9a9	0	-1.21806	0.323	0.731	0
Atp1b3	0	0.385512	0.831	0.531	0
Ephb1	0	-0.902207	0.108	0.389	0
Slco2a1	0	0.401337	0.646	0.289	0
Tmem108	0	0.573198	0.948	0.854	0
Cpne4	0	0.684227	0.957	0.787	0
Trank1	0	-0.711719	0.68	0.84	0
Ctdspl	0	-1.17204	0.226	0.771	0
Ctnnb1	0	0.443706	0.81	0.481	0
Cck	0	0.336977	0.813	0.47	0
Pla2g3	0	0.669398	0.732	0.249	0
Inpp5j	0	0.611845	0.71	0.2	0
Ramp3	0	0.873373	0.711	0.037	0
Adcy1	0	0.417167	0.855	0.545	0
Vwc2	0	0.896278	0.847	0.314	0
Ddc	0	-2.22612	0.087	0.553	0
1700042O10Rik	0	-2.0081	0.032	0.509	0
Grb10	0	-0.933597	0.727	0.803	0
Gm12027	0	0.410447	0.517	0.102	0
5730522E02Rik	0	-1.32599	0.5	0.757	0
Eml6	0	-0.479153	0.946	0.928	0
Acyp2	0	0.513415	0.94	0.794	0
Slit3	0	0.455969	0.931	0.531	0
Tenm2	0	-1.37622	0.967	0.937	0
Gabrb2	0	1.2136	0.969	0.738	0
Adra1b	0	0.748659	0.761	0.227	0
Sgcd	0	-2.30729	0.803	0.9	0
Adamts2	0	0.305246	0.601	0.248	0
Fstl4	0	1.68404	0.899	0.358	0
Rapgef6	0	-0.55022	0.875	0.889	0
Glra1	0	0.257528	0.448	0.155	0
Gria1	0	-1.1966	0.841	0.904	0
Wnt9a	0	0.286607	0.393	0.054	0
Rasd1	0	0.336304	0.392	0.029	0
Kcnj12	0	0.284879	0.434	0.083	0
Rnf112	0	1.12298	0.958	0.56	0
Ttc19	0	0.684458	0.97	0.834	0
Shisa6	0	1.30472	0.919	0.578	0
Ntn1	0	-1.51065	0.053	0.47	0
6330403K07Rik	0	-0.582534	0.389	0.629	0
Rtn4rl1	0	0.659683	0.8	0.242	0
Coro6	0	0.622347	0.78	0.255	0
Nlk	0	-0.615113	0.86	0.87	0
Wsb1	0	-0.620454	0.713	0.802	0
Cdk5r1	0	0.415792	0.713	0.343	0
Acaca	0	-0.591532	0.823	0.874	0
Car4	0	0.479351	0.466	0.097	0
Ypel2	0	0.316681	0.853	0.591	0
Tspoap1	0	0.481535	0.915	0.723	0
Hlf	0	0.795523	0.871	0.365	0
Cacna1g	0	0.835936	0.915	0.468	0
Xylt2	0	0.750726	0.721	0.153	0
Plxdc1	0	0.532319	0.605	0.119	0
Krt12	0	0.384106	0.472	0.108	0
A830036E02Rik	0	0.450097	0.57	0.131	0
Hap1	0	-0.741334	0.374	0.641	0
Zfp385c	0	0.267562	0.265	0.016	0
Gpatch8	0	0.407066	0.981	0.948	0
Adam11	0	0.364312	0.729	0.377	0
Gjc1	0	0.488676	0.503	0.027	0
Wnt3	0	0.441094	0.506	0.021	0
Nsf	0	0.452394	0.981	0.915	0
Pitpnc1	0	2.1202	0.967	0.619	0
Gm11713	0	0.653267	0.611	0.105	0
Cacng5	0	0.359761	0.467	0.065	0
Prkca	0	-2.64803	0.324	0.872	0
Abca8b	0	-0.589415	0.286	0.561	0
Sdk2	0	1.18994	0.919	0.381	0
Rab37	0	0.791954	0.724	0.08	0
Grin2c	0	0.914797	0.759	0.068	0
Fdxr	0	0.259307	0.542	0.26	0
Fads6	0	0.267248	0.462	0.119	0
Tnrc6c	0	-0.563175	0.95	0.936	0
Adarb2	0	0.991402	0.949	0.67	0
Dip2c	0	-1.05891	0.93	0.955	0
Ryr2	0	-1.53672	0.427	0.735	0
Edaradd	0	0.378399	0.399	0.012	0
Ero1lb	0	0.706182	0.799	0.315	0
Elmo1	0	1.47459	0.966	0.679	0
Gm40841	0	0.383605	0.906	0.657	0
A330102I10Rik	0	0.502466	0.832	0.463	0
Gmds	0	-0.629029	0.862	0.887	0
Cdyl	0	0.52066	0.731	0.291	0
Nrn1	0	0.325385	0.799	0.484	0
Bmp6	0	0.887437	0.661	0.056	0
Phactr1	0	-2.59079	0.393	0.901	0
Rnf182	0	0.555577	0.663	0.207	0
Atxn1	0	0.771744	0.982	0.947	0
Wnk2	0	0.721154	0.966	0.841	0
Shc3	0	1.57548	0.955	0.618	0
Gm2762	0	0.294468	0.46	0.149	0
Spock1	0	1.4158	0.968	0.678	0
Adcy2	0	-1.2313	0.211	0.608	0
Slc6a3	0	-1.50364	0.049	0.409	0
Ell2	0	0.577958	0.751	0.312	0
Rhobtb3	0	0.432652	0.732	0.359	0
Mctp1	0	-1.19289	0.61	0.806	0
Nr2f1	0	0.613996	0.757	0.237	0
A830082K12Rik	0	1.07642	0.933	0.395	0
Mef2c	0	0.434457	0.939	0.653	0
Edil3	0	1.39385	0.977	0.582	0
Ssbp2	0	-1.23482	0.679	0.875	0
Rasgrf2	0	-1.17825	0.285	0.738	0
Pde8b	0	-0.85791	0.405	0.662	0
Iqgap2	0	-0.874213	0.094	0.503	0
Sv2c	0	-1.72874	0.101	0.478	0
Arhgef28	0	-0.703169	0.339	0.648	0
Tnpo1	0	-0.530212	0.676	0.782	0
Mast4	0	1.36312	0.977	0.843	0
Rgs7bp	0	1.24439	0.978	0.803	0
Parp8	0	-0.849364	0.664	0.815	0
Hcn1	0	-1.39163	0.266	0.592	0
Fam49a	0	0.337089	0.836	0.556	0
Hpcal1	0	-0.49963	0.136	0.414	0
Asap2	0	0.771352	0.913	0.625	0
Mboat2	0	-0.568183	0.454	0.682	0
Gm9866	0	0.369453	0.748	0.462	0
Myt1l	0	0.338899	0.98	0.942	0
Hdac9	0	0.90963	0.986	0.917	0
Dgkb	0	-1.81748	0.836	0.937	0
Dock4	0	-1.44167	0.737	0.898	0
Ttc6	0	-0.961021	0.043	0.442	0
Nin	0	1.38578	0.963	0.68	0
Abhd12b	0	2.17246	0.681	0.014	0
Trim9	0	0.675895	0.974	0.88	0
Rtn1	0	-1.0177	0.943	0.97	0
Prkch	0	1.14616	0.773	0.08	0
Syt16	0	-1.04263	0.476	0.823	0
Kcnh5	0	0.396135	0.786	0.329	0
Mpp5	0	-0.472777	0.236	0.501	0
Plekhd1	0	0.727051	0.677	0.085	0
Sipa1l1	0	-1.10186	0.66	0.84	0
Rgs6	0	-1.80831	0.431	0.694	0
Ttll5	0	0.383675	0.904	0.712	0
Zdhhc22	0	0.596103	0.681	0.147	0
Sptlc2	0	0.514739	0.838	0.543	0
Eml5	0	-0.596733	0.854	0.889	0
Calm1	0	0.514577	0.986	0.898	0
Ttc7b	0	0.803883	0.964	0.796	0
Ppp4r4	0	0.852553	0.93	0.575	0
Clmn	0	1.89017	0.948	0.353	0
Cyp46a1	0	0.53895	0.795	0.353	0
Eml1	0	1.35439	0.946	0.479	0
Dlk1	0	-1.15205	0.08	0.452	0
Traf3	0	-1.37968	0.126	0.813	0
Ckb	0	0.494742	0.962	0.812	0
Vipr2	0	0.890986	0.556	0.04	0
Gm20658	0	0.366444	0.337	0.012	0
Esyt2	0	0.870402	0.973	0.842	0
Rapgef5	0	-0.968692	0.584	0.754	0
Itgb8	0	-0.4533	0.042	0.316	0
Tmem196	0	-0.697028	0.143	0.506	0
Oxct1	0	0.392536	0.959	0.846	0
Plcxd3	0	-1.52459	0.333	0.76	0
C6	0	0.679001	0.235	0.021	0
Dab2	0	0.518609	0.497	0.059	0
Cdh6	0	1.21922	0.835	0.248	0
Cdh9	0	-1.02924	0.123	0.519	0
Cdh12	0	1.60831	0.928	0.488	0
Gm2824	0	-0.449332	0.094	0.392	0
March11	0	0.573433	0.802	0.551	0
Fbxl7	0	-1.4259	0.3	0.568	0
Trio	0	0.527596	0.975	0.919	0
Sema5a	0	0.933808	0.855	0.348	0
Sdc2	0	-1.14632	0.242	0.646	0
Ywhaz	0	0.407142	0.952	0.798	0
Fzd6	0	0.573373	0.419	0.016	0
Cthrc1	0	0.622084	0.67	0.161	0
Rims2	0	0.958507	0.986	0.956	0
Trps1	0	0.938637	0.968	0.738	0
Ext1	0	-0.882116	0.855	0.869	0
Sntb1	0	0.428214	0.514	0.236	0
Fam49b	0	0.432079	0.969	0.89	0
Adcy8	0	1.22355	0.951	0.512	0
Gm21798	0	0.870063	0.851	0.316	0
Kcnq3	0	1.16884	0.976	0.915	0
Khdrbs3	0	0.277731	0.933	0.713	0
Fam135b	0	-1.18395	0.753	0.887	0
Adgrb1	0	1.4054	0.956	0.626	0
Lynx1	0	0.477031	0.755	0.333	0
Ly6h	0	-1.16873	0.597	0.886	0
Arhgap39	0	-0.534587	0.709	0.79	0
Kctd17	0	0.944245	0.902	0.44	0
Ccdc134	0	0.281341	0.431	0.106	0
Tcf20	0	-0.484676	0.935	0.924	0
Pacsin2	0	0.311916	0.654	0.343	0
1810041L15Rik	0	0.78181	0.839	0.311	0
Shank3	0	0.759475	0.926	0.663	0
Cpne8	0	-0.875758	0.116	0.515	0
Abcd2	0	0.308273	0.481	0.151	0
Slc2a13	0	0.549057	0.953	0.807	0
Pdzrn4	0	-1.76081	0.567	0.871	0
Prickle1	0	1.16473	0.978	0.873	0
Nell2	0	1.11905	0.972	0.796	0
Scn8a	0	0.412324	0.969	0.85	0
AC124490.1	0	0.91394	0.658	0.128	0
Rbfox1	0	2.10401	0.997	0.829	0
Snx29	0	0.517774	0.942	0.793	0
Shisa9	0	0.666393	0.96	0.824	0
Pkp2	0	0.724288	0.763	0.227	0
Fgd4	0	-0.615113	0.617	0.778	0
Aifm3	0	0.445739	0.799	0.407	0
Dgkg	0	-1.019	0.23	0.518	0
Il1rap	0	0.924452	0.915	0.647	0
Gm20319	0	0.325939	0.511	0.237	0
Fgf12	0	0.611241	0.986	0.967	0
Mb21d2	0	1.4952	0.92	0.303	0
Dlg1	0	-1.1652	0.427	0.838	0
Slc12a8	0	0.45792	0.488	0.06	0
Heg1	0	0.821981	0.619	0.073	0
Kalrn	0	1.05382	0.986	0.936	0
Stxbp5l	0	-1.12098	0.691	0.878	0
Fstl1	0	0.28089	0.523	0.229	0
Lsamp	0	-1.0115	0.995	0.99	0
Zbtb20	0	-1.54727	0.845	0.919	0
Sidt1	0	-0.644516	0.295	0.581	0
Ift57	0	0.648119	0.795	0.393	0
Cd47	0	0.813446	0.955	0.718	0
Alcam	0	-1.78087	0.297	0.719	0
Gbe1	0	0.441277	0.65	0.345	0
Robo1	0	0.881934	0.987	0.924	0
Robo2	0	-1.87321	0.607	0.884	0
Ncam2	0	-1.55099	0.746	0.896	0
Jam2	0	0.2706	0.309	0.109	0
Grik1	0	0.628264	0.828	0.471	0
Ttc3	0	-0.426632	0.985	0.974	0
Pcp4	0	1.65585	0.914	0.439	0
Zdhhc14	0	0.716741	0.957	0.731	0
Snx9	0	0.320299	0.693	0.37	0
Synj2	0	0.551267	0.713	0.257	0
Tulp4	0	-0.856577	0.737	0.885	0
Tmem181a	0	-0.980656	0.702	0.9	0
Gm26848	0	-1.24916	0.953	0.975	0
Qk	0	-1.04167	0.599	0.708	0
Agpat4	0	-0.94128	0.217	0.678	0
Tcte2	0	-1.20004	0.21	0.76	0
Afdn	0	-0.963138	0.726	0.896	0
Lix1	0	-0.968353	0.141	0.434	0
Baiap3	0	-0.788251	0.053	0.343	0
Gm26694	0	0.476004	0.953	0.813	0
Rab40c	0	0.512109	0.893	0.645	0
Grm4	0	0.846362	0.806	0.17	0
Ppard	0	0.379961	0.646	0.288	0
March2	0	0.396329	0.798	0.487	0
Ptchd4	0	0.49491	0.804	0.423	0
Adgrf5	0	0.408892	0.332	0.013	0
Slc29a1	0	0.436405	0.525	0.129	0
Ppp2r5d	0	0.325771	0.587	0.215	0
Man2a1	0	0.551456	0.841	0.478	0
Rab31	0	0.317033	0.701	0.379	0
Ankrd12	0	-0.536636	0.919	0.92	0
Ptprm	0	1.40998	0.959	0.411	0
Epb41l3	0	1.24071	0.978	0.691	0
Galnt14	0	0.605476	0.665	0.243	0
Calm2	0	0.377584	0.981	0.895	0
Nrxn1	0	0.39447	0.996	0.986	0
Colec12	0	0.361004	0.375	0.06	0
Osbpl1a	0	0.376992	0.905	0.673	0
Cdh2	0	0.696238	0.973	0.863	0
Celf4	0	-1.28137	0.907	0.951	0
Camk4	0	0.379043	0.928	0.731	0
Reep2	0	0.529021	0.868	0.542	0
Lrrtm2	0	0.276963	0.56	0.26	0
Nr3c1	0	1.02026	0.909	0.442	0
2900055J20Rik	0	0.586676	0.814	0.297	0
Kctd16	0	1.02933	0.963	0.542	0
Tcerg1	0	0.411851	0.876	0.661	0
Ppp2r2b	0	-0.591646	0.975	0.955	0
Mcc	0	-1.53111	0.439	0.626	0
Fem1c	0	0.391653	0.657	0.306	0
Sema6a	0	1.51051	0.916	0.386	0
Prr16	0	-1.77025	0.491	0.766	0
March3	0	0.730074	0.794	0.331	0
Adamts19	0	1.5176	0.7	0.06	0
Camk2a	0	0.525301	0.974	0.741	0
Slc6a7	0	0.369274	0.78	0.429	0
Arhgef37	0	0.250628	0.353	0.072	0
Spink10	0	0.429114	0.75	0.46	0
Gnal	0	0.553448	0.92	0.691	0
Dcc	0	-2.2515	0.789	0.93	0
Ctif	0	0.653453	0.939	0.754	0
Socs6	0	0.951936	0.884	0.427	0
Rttn	0	0.550568	0.783	0.416	0
Dok6	0	-0.690046	0.954	0.928	0
Dagla	0	0.489563	0.804	0.448	0
Syt7	0	1.24779	0.975	0.741	0
Gnaq	0	-0.705863	0.94	0.94	0
Trpm6	0	0.388333	0.321	0.032	0
Rorb	0	2.57987	0.908	0.197	0
Trpm3	0	-2.38941	0.489	0.8	0
Fam189a2	0	0.646728	0.728	0.19	0
Smarca2	0	0.370893	0.912	0.697	0
Rfx3	0	-0.997806	0.703	0.78	0
Slc1a1	0	0.645503	0.893	0.564	0
4430402I18Rik	0	0.493914	0.822	0.498	0
Prkg1	0	-2.16852	0.681	0.927	0
A830019P07Rik	0	0.461845	0.479	0.098	0
Lgi1	0	-0.685049	0.406	0.672	0
Sorbs1	0	0.742653	0.961	0.872	0
Slit1	0	-0.805295	0.148	0.579	0
Got1	0	0.317597	0.793	0.504	0
Arl3	0	0.396974	0.917	0.725	0
Sfxn2	0	0.400591	0.594	0.241	0
Neurl1a	0	-0.539933	0.157	0.522	0
Tcf7l2	0	3.04561	0.983	0.116	0
Adrb1	0	0.326989	0.5	0.155	0
Atrnl1	0	1.01825	0.975	0.842	0
Hspa12a	0	0.672815	0.855	0.463	0
Slc18a2	0	-1.75626	0.385	0.599	0
Grk5	0	0.473607	0.799	0.501	0
Cacng8	0	-0.450186	0.327	0.569	0
Dnah7a	0	-0.519995	0.134	0.407	0
Pcca	0	0.387631	0.952	0.843	0
1700111E14Rik	0	0.351503	0.759	0.489	0
Dclk2	0	0.386218	0.93	0.791	0
Fstl5	0	-1.31106	0.508	0.658	0
Strbp	0	0.303839	0.988	0.971	0
Lrrc49	0	0.367866	0.924	0.762	0
Bmpr2	0	-0.497161	0.721	0.803	0
Gm48383	0	0.293081	0.701	0.406	0
Dtnb	0	-0.474053	0.913	0.898	0
Zmiz1os1	0	-0.378279	0.075	0.352	0
Lingo1	0	0.361862	0.893	0.668	0
Gabra2	0	-1.06252	0.541	0.689	0
Cpne6	0	-0.516032	0.207	0.474	0
Kmt2a	0	-0.453917	0.922	0.919	0
Smim13	0	0.311681	0.767	0.488	0
Runx2	0	0.334683	0.844	0.552	0
Ankfn1	0	-0.945779	0.151	0.412	0
Chrna6	0	-0.557477	0.029	0.292	0
Hdx	0	0.300085	0.755	0.46	0
Phyhipl	0	-0.489588	0.295	0.543	0
4930517O19Rik	0	0.278662	0.778	0.465	0
Gng4	0	-0.374626	0.059	0.331	0
Gpr137c	0	0.382547	0.885	0.643	0
Sh3bp5	0	-0.454341	0.277	0.52	0
Diaph2	0	0.387577	0.943	0.805	0
Vti1a	0	0.372365	0.961	0.861	0
Zfp608	0	0.398057	0.897	0.692	0
Ghr	0	-1.14909	0.442	0.636	0
Park2	0	-0.419375	0.975	0.961	0
Slc41a2	0	0.378059	0.793	0.541	0
Kcnj6	0	-1.2553	0.845	0.837	0
Ccdc148	0	-0.570994	0.631	0.74	0
Lrrc40	0	0.306697	0.663	0.392	0
Olfm2	0	-0.497331	0.325	0.569	0
Rasgef1b	0	0.442029	0.956	0.84	0
Ogt	0	0.323792	0.972	0.913	0
Ppp1r16b	0	-0.475119	0.193	0.457	0
Ncs1	0	0.316476	0.833	0.58	0
Psd	0	-0.439264	0.305	0.547	0
Carmil3	0	-0.517304	0.349	0.566	0
Acsl6	0	0.282914	0.773	0.502	0
Gm28905	0	-0.869088	0.401	0.648	0
Rcan2	0	0.331904	0.954	0.732	0
Bbs9	0	-0.586911	0.602	0.728	0
Gabbr1	0	0.318477	0.943	0.814	0
Il1rapl2	0	-2.38903	0.486	0.629	0
Pkig	0	-0.510958	0.368	0.579	0
Gfra1	0	-1.28172	0.2	0.434	0
B4galt5	0	0.326609	0.767	0.498	0
Rev3l	0	-0.499128	0.896	0.897	0
Nxn	0	-0.53366	0.078	0.336	0
Etv6	0	0.337665	0.826	0.576	0
Gm11418	0	-0.412554	0.034	0.288	0
Herc3	0	0.326184	0.894	0.683	0
Hsph1	0	0.28878	0.77	0.503	0
Mtss1l	0	-0.413299	0.212	0.47	0
Gm48742	0	-0.552138	0.231	0.49	0
Gm48747	0	0.36485	0.793	0.558	0
Mpc2	0	0.307133	0.775	0.505	0
Ndst4	0	-0.83988	0.106	0.362	0
Nxph1	0	0.2807	0.725	0.44	0
4930419G24Rik	0	0.266157	0.819	0.516	0
Gap43	0	-0.577885	0.882	0.884	0
Elavl4	0	-0.779746	0.867	0.84	0
Zkscan16	0	-0.456217	0.26	0.503	0
Cnih3	0	0.304854	0.521	0.257	0
Chd5	0	-0.452183	0.545	0.692	0
Ctr9	0	0.252891	0.656	0.382	0
Dkk3	0	-0.361603	0.058	0.313	0
P3h2	0	-0.464188	0.116	0.374	0
Ppp1r13b	0	0.338722	0.927	0.756	0
Cnpy1	0	-0.468889	0.067	0.316	0
Ephb2	0	-0.50225	0.429	0.619	0
Klhl2	0	-0.60143	0.486	0.646	0
Cacna2d3	0	0.451111	0.977	0.864	0
Gm16083	0	-0.576659	0.408	0.615	0
Tspan5	0	0.270375	0.932	0.727	0
Srgap1	0	0.365918	0.946	0.71	0
Erc2	0	-1.08047	0.983	0.969	0
Grm8	0	-1.21946	0.37	0.595	0
Ptpru	0	-0.755607	0.367	0.542	0
Rnf130	0	0.364708	0.9	0.756	0
Gabra1	0	0.253643	0.796	0.495	0
Depdc5	0	0.346268	0.883	0.698	0
Gm12394	0	0.334456	0.758	0.509	0
Gm10684	0	0.2547	0.712	0.425	0
Lpp	0	-0.684484	0.439	0.615	0
Dnajc15	0	0.287928	0.709	0.44	0
Prkd1	0	-0.562584	0.074	0.323	0
Baiap2	0	-0.617912	0.173	0.413	0
Ttll7	0	0.304262	0.915	0.755	0
Gm44644	0	-0.370745	0.131	0.387	0
Gm27032	0	0.303933	0.756	0.474	0
Sptbn1	0	0.301004	0.977	0.941	0
Gsg1l	0	-0.551685	0.165	0.415	0
Rin2	0	-0.531286	0.188	0.423	0
Cntnap5c	0	0.267203	0.825	0.519	0
Kcns3	0	-0.602722	0.037	0.276	0
Fam126a	0	-0.386259	0.107	0.357	0
D430041D05Rik	0	-0.540164	0.688	0.825	0
Ube2g1	0	0.348123	0.903	0.743	0
Eps8	0	0.304792	0.631	0.359	0
Senp7	0	-0.450444	0.788	0.82	0
Arhgap12	0	0.345151	0.868	0.653	0
Gnao1	0	-0.396465	0.936	0.932	0
Tmem130	0	-0.537858	0.609	0.737	0
Adamtsl1	0	-1.84025	0.409	0.554	0
Dchs2	0	-0.420251	0.08	0.326	0
Nrp2	0	-0.630635	0.172	0.407	0
Sycp2	0	0.303902	0.769	0.51	0
Ppp1r9a	0	-0.557259	0.909	0.904	0
Gabrg3	0	0.51959	0.89	0.661	0
Prkacb	0	-0.476622	0.684	0.761	0
Chrna7	0	-0.560691	0.251	0.478	0
Pde10a	0	0.334285	0.979	0.918	0
Gm28376	0	-0.580089	0.127	0.374	0
Deptor	0	0.290755	0.665	0.4	0
Sorbs2os	0	0.346223	0.908	0.719	0
Elfn1	0	-0.376683	0.041	0.279	0
Gm20642	0	0.371206	0.969	0.858	0
Htr4	0	-0.580672	0.075	0.317	0
Pcsk1n	0	-0.772487	0.886	0.898	0
Pdzd8	0	0.3163	0.806	0.568	0
Maml3	0	-0.918002	0.584	0.679	0
Pard3	0	0.268308	0.903	0.632	0
Colgalt2	0	-0.493016	0.103	0.345	0
Prima1	0	-0.422049	0.024	0.256	0
Mast2	0	-0.453216	0.847	0.854	0
Ddhd1	0	0.296912	0.885	0.697	0
Usp11	0	-0.415357	0.292	0.521	0
Gm11149	0	-0.493158	0.418	0.603	0
Rasa2	0	-0.506903	0.612	0.711	0
Gm32618	0	-0.40238	0.141	0.387	0
Snx6	0	0.307619	0.81	0.579	0
Gaa	0	-0.524777	0.461	0.627	0
AW551984	0	-0.360321	0.03	0.262	0
Hs2st1	0	-0.479003	0.713	0.775	0
Itsn2	0	-0.454883	0.707	0.781	0
Lin28b	0	0.308194	0.885	0.633	0
Ndufs3	0	0.291879	0.797	0.547	0
Slc10a4	0	-0.357224	0.026	0.255	0
Myo9a	0	-0.363762	0.944	0.927	0
C130071C03Rik	0	-0.644484	0.737	0.739	0
Cacna2d2	0	-0.674765	0.475	0.592	0
Grip2	0	-0.828462	0.344	0.505	0
Pacrg	0	-0.614713	0.55	0.677	0
Man1a	0	-0.96736	0.137	0.37	0
Reep1	0	0.323692	0.954	0.845	0
Nrbp2	0	0.279772	0.818	0.562	0
Unc5a	0	-0.324951	0.108	0.351	0
Prkar2b	0	-0.460924	0.333	0.549	0
Rundc3b	0	-0.449377	0.71	0.776	0
Htr7	0	0.368673	0.493	0.255	0
Katnal2	0	-0.356709	0.135	0.378	0
2010300C02Rik	0	-0.611114	0.232	0.45	0
Pard3b	0	-1.10953	0.14	0.369	0
Ablim3	0	0.295084	0.851	0.584	0
R3hdm2	0	0.336687	0.968	0.878	0
Sybu	0	-0.405027	0.925	0.909	0
Gm2164	0	-0.446223	0.037	0.263	0
Immp2l	0	-0.631641	0.89	0.873	0
Dock9	0	-0.470578	0.887	0.871	0
Nipal2	0	0.355739	0.853	0.638	0
Map7	0	-0.575687	0.694	0.759	0
Gm15398	0	-0.825018	0.544	0.642	0
Phka2	0	0.26088	0.776	0.522	0
Axin1	0	0.276182	0.789	0.544	0
Pld3	0	-0.40806	0.343	0.547	0
Catspere2	0	-0.484187	0.731	0.783	0
Gas7	0	-0.656422	0.264	0.468	0
Stxbp5	0	-0.451163	0.782	0.802	0
Macf1	0	-0.308277	0.98	0.97	0
Rgs20	0	-0.709968	0.47	0.617	0
Nckap5	0	-0.791335	0.271	0.484	0
Gm45844	0	-0.447549	0.386	0.571	0
Cacna1h	0	-0.284473	0.043	0.266	0
Ssbp3	0	-0.487892	0.548	0.669	0
Ldlrad4	0	-0.648493	0.872	0.844	0
Efcab1	0	-0.438621	0.242	0.467	0
Slc8a3	0	0.338131	0.936	0.747	0
2410089E03Rik	0	-0.375232	0.945	0.92	0
Nol4l	0	-0.449887	0.577	0.698	0
Cdh8	0	-0.963008	0.725	0.806	0
Rab6b	0	0.302367	0.953	0.835	0
Pcdh19	0	-0.604211	0.315	0.514	0
Mpc1	0	0.302359	0.907	0.728	0
Sgsm1	0	-0.438865	0.602	0.704	0
Slc6a6	0	-0.44448	0.654	0.736	0
Vwa5b1	0	-0.442836	0.034	0.252	0
Dock10	0	-0.866761	0.252	0.472	0
Svop	0	-0.438739	0.673	0.738	0
St6galnac5	0	-0.801634	0.527	0.677	0
Myrip	0	0.322436	0.893	0.714	0
Gm21949	0	-0.601388	0.35	0.517	0
Sh3gl3	0	-0.407026	0.245	0.467	0
Actr3b	0	0.290288	0.818	0.575	0
Spns2	0	-0.343315	0.173	0.403	0
Palm	0	-0.407375	0.43	0.602	0
Grik5	0	-0.422109	0.75	0.788	0
Pou3f2	0	-0.386508	0.04	0.258	0
N4bp2	0	-0.41213	0.176	0.402	0
Ube2d1	0	0.252875	0.786	0.543	0
Cog5	0	-0.419667	0.847	0.849	0
Dynlt1a	0	-0.322866	0.118	0.351	0
Zmynd11	0	-0.376803	0.862	0.867	0
Cplx2	0	-0.422311	0.313	0.524	0
Celf6	0	-0.393845	0.243	0.462	0
Dock11	0	-0.473185	0.137	0.375	0
Pak1	0	0.257979	0.915	0.749	0
Mbtd1	0	0.308497	0.934	0.814	0
Stat5b	0	-0.511373	0.464	0.608	0
Bmpr1a	0	-0.433975	0.486	0.641	0
Fhl1	0	-0.403624	0.427	0.597	0
Zbtb38	0	0.329392	0.901	0.735	0
Specc1	0	0.325711	0.951	0.825	0
Il13ra1	0	-0.352527	0.055	0.275	0
Pacs1	0	-0.433264	0.813	0.836	0
Clstn3	0	0.285782	0.889	0.699	0
Frmd4b	0	-1.08763	0.577	0.646	0
Jph1	0	-0.40599	0.093	0.317	0
Ankrd6	0	-0.4171	0.338	0.548	0
2610035D17Rik	0	-0.501609	0.361	0.544	0
Rere	0	-0.307307	0.977	0.961	0
Mlf2	0	0.252044	0.804	0.557	0
Slc22a17	0	-0.436226	0.76	0.805	0
Zcchc12	0	-0.448992	0.241	0.455	0
Lyst	0	-0.509816	0.745	0.769	0
Trpc5	0	-0.831138	0.267	0.466	0
Mark2	0	-0.408482	0.759	0.785	0
Gm45645	0	-0.422187	0.197	0.412	0
Tmem178	0	-0.437242	0.1	0.319	0
Dexi	0	0.25056	0.713	0.469	0
Cd200	0	-0.412968	0.306	0.505	0
Nrxn3	0	-0.843683	0.991	0.965	0
Radil	0	-0.344064	0.251	0.468	0
Dpysl5	0	-0.495717	0.439	0.593	0
Fam167a	0	-0.286879	0.013	0.212	0
Syt5	0	-0.333583	0.158	0.381	0
Dpysl3	0	-0.483978	0.52	0.65	0
B3galt1	0	-1.02066	0.968	0.951	0
Mcf2l	0	-0.39703	0.647	0.722	0
Serinc5	0	-0.2937	0.109	0.337	0
4930445B16Rik	0	-0.470405	0.153	0.372	0
Cdk17	0	-0.466239	0.72	0.755	0
Cys1	0	-0.268027	0.071	0.288	0
Rab27b	0	-0.529822	0.459	0.608	0
A230006K03Rik	0	0.32388	0.97	0.887	0
Clstn1	0	0.275185	0.915	0.746	0
4930545L23Rik	0	-0.274202	0.052	0.262	0
C230014O12Rik	0	-0.283303	0.027	0.23	0
Grk3	0	0.253908	0.871	0.63	0
Hspa4l	0	0.290938	0.884	0.702	0
Gabra3	0	-0.429287	0.493	0.69	0
Dennd1a	0	-0.323221	0.961	0.947	0
5530401A14Rik	0	-0.279272	0.028	0.228	0
Gpd2	0	-0.349623	0.204	0.42	0
Simc1	0	-0.430634	0.431	0.597	0
Ergic1	0	0.284756	0.86	0.662	0
Sgip1	0	0.250988	0.982	0.954	0
Rmnd5a	0	0.263306	0.803	0.585	0
Ppfia2	0	-0.453431	0.975	0.95	0
Arrb1	0	-0.381983	0.351	0.537	0
Ston2	0	-0.358804	0.047	0.251	0
Ndufaf4	0	0.27578	0.793	0.56	0
Galnt7	0	0.27632	0.726	0.485	0
Agbl4	0	-0.405327	0.98	0.954	0
Zmynd8	0	-0.372681	0.914	0.897	0
Nav3	0	0.274767	0.984	0.917	0
Fgfr2	0	-0.349375	0.968	0.956	0
Rgs9	0	-0.393157	0.073	0.281	0
Gm36975	0	-0.453262	0.737	0.774	0
March8	0	-0.411202	0.432	0.586	0
Dscaml1	0	-1.06458	0.3	0.462	0
4921518K17Rik	0	-0.261749	0.013	0.203	0
Pid1	0	-0.630683	0.824	0.823	0
Pcdh7	0	-0.869508	0.946	0.91	0
Fam214a	0	-0.448126	0.576	0.678	0
Abi2	0	-0.389202	0.847	0.839	0
Samd12	0	-0.382564	0.961	0.937	0
Efnb3	0	-0.38883	0.104	0.313	0
H13	0	-0.401483	0.498	0.628	0
Camk2b	0	0.28173	0.929	0.799	0
Zfyve9	0	0.281897	0.946	0.838	0
Lrmda	0	-0.927981	0.243	0.427	0
Igdcc4	0	-0.376901	0.249	0.445	0
Eef2k	0	-0.34645	0.266	0.47	0
Crhr1	0	-0.318925	0.107	0.316	0
Exoc4	0	-0.302257	0.966	0.947	0
Gm27008	0	-0.292039	0.11	0.323	0
Phldb2	0	-0.498437	0.078	0.286	0
Arid4b	0	-0.37436	0.911	0.896	0
Ebf4	0	-0.266556	0.083	0.292	0
Enpp2	0	-0.558191	0.169	0.384	0
Arhgef11	0	-0.418035	0.819	0.823	0
Scg3	0	-0.40561	0.3	0.488	0
Gucy2c	0	-0.335541	0.045	0.241	0
Msh3	0	-0.488675	0.46	0.596	0
Fhod3	0	0.339245	0.896	0.68	0
Drp2	0	-0.437105	0.383	0.536	0
Gm44643	0	-0.3073	0.139	0.35	0
Prex2	0	-0.466716	0.092	0.294	0
Arl15	0	-0.522405	0.885	0.867	0
Kdm3b	0	0.25907	0.783	0.579	0
Frem1	0	-0.321649	0.028	0.218	0
Pkp4	0	-0.379057	0.907	0.887	0
Bcr	0	-0.375346	0.527	0.645	0
Scube1	0	-0.317653	0.057	0.259	0
Glp2r	0	-0.690635	0.336	0.498	0
Slc39a12	0	-0.321951	0.052	0.248	0
Mblac2	0	-0.4029	0.678	0.737	0
Heatr5a	0	-0.406763	0.287	0.475	0
Tusc3	0	-0.406178	0.717	0.761	0
Klf7	0	0.281631	0.874	0.708	0
Sphkap	0	-0.66259	0.587	0.709	0
Camk2g	0	-0.441525	0.568	0.659	0
Zdhhc23	0	-0.263957	0.094	0.298	0
Mark1	0	-0.391798	0.628	0.705	0
Tll1	0	-0.893694	0.177	0.385	0
Begain	0	-0.463876	0.457	0.583	0
Cnr1	0	-0.419906	0.103	0.304	0
Psd2	0	-0.385403	0.177	0.374	0
Hdac8	0	0.279749	0.929	0.813	0
Pfkfb4	0	-0.330325	0.243	0.438	0
Gnb4	0	-0.33472	0.065	0.26	0
Arhgap20	0	-0.468328	0.484	0.607	0
Gpsm1	0	-0.342545	0.253	0.448	0
Stxbp6	0	0.830026	0.464	0.285	0
Fxyd6	0	-0.371081	0.118	0.319	0
Zeb2	0	-1.27927	0.153	0.339	0
Snph	0	0.295331	0.917	0.769	0
Slc6a15	0	-0.380328	0.38	0.546	0
Dnah9	0	-0.526691	0.244	0.424	0
Col11a1	0	-0.66773	0.094	0.295	0
Hunk	0	-0.321756	0.107	0.314	0
Ntf3	0	-0.397932	0.039	0.225	0
Actr1b	0	0.260461	0.87	0.688	0
Scamp1	0	-0.383068	0.622	0.701	0
Cyld	0	0.286914	0.908	0.755	0
Ube3a	0	0.250762	0.986	0.966	0
Efr3b	0	0.258121	0.907	0.732	0
Grid1	0	0.316262	0.974	0.932	0
Slc24a4	0	-0.361785	0.034	0.217	0
4732471J01Rik	0	-0.432252	0.668	0.734	0
Shisa3	0	-0.251408	0.071	0.264	0
Adamts6	0	-0.637259	0.288	0.463	0
Flnb	0	0.270926	0.913	0.759	0
4933413L06Rik	0	-0.295681	0.06	0.252	0
Sgcz	0	-0.978433	0.912	0.893	0
Ralgps1	0	-0.34038	0.893	0.869	0
Mkl1	0	-0.397517	0.755	0.774	0
Ddah1	0	0.264465	0.809	0.581	0
Mmd2	0	-0.29923	0.079	0.271	0
Itfg1	0	-0.411988	0.762	0.795	0
Astn1	0	-0.365348	0.94	0.912	0
Mapt	0	-0.325508	0.973	0.958	0
Agk	0	-0.567633	0.597	0.661	0
Pou2f2	0	-0.430118	0.278	0.455	0
Gzmk	0	-0.303373	0.021	0.194	0
Satb1	0	-0.767758	0.397	0.506	0
Dip2b	0	-0.377593	0.917	0.892	0
Dym	0	0.276215	0.911	0.767	0
Nedd4	0	-0.354141	0.894	0.888	0
Spata1	0	-0.331274	0.16	0.351	0
Garnl3	0	-0.53468	0.84	0.792	0
Dock7	0	0.270746	0.946	0.853	0
Pde11a	0	-0.606604	0.083	0.269	0
Rbm39	0	-0.272444	0.978	0.965	0
Sergef	0	0.296767	0.871	0.714	0
Tsc22d1	0	-0.32558	0.93	0.898	0
Negr1	0	-0.804297	0.969	0.955	0
Gm32014	0	-0.376732	0.241	0.428	0
Nol4	0	0.264425	0.963	0.881	0
Rnf150	0	0.304882	0.912	0.733	0
Tmcc1	0	-0.312083	0.957	0.937	0
Mpped1	0	-0.424764	0.118	0.306	0
Tcf4	0	-1.14213	0.847	0.801	0
L3mbtl4	0	-0.475225	0.118	0.3	0
Gm38393	0	0.255845	0.895	0.728	0
Wwox	0	0.320399	0.963	0.886	0
Nsd1	0	-0.332088	0.942	0.93	0
AC129186.1	0	-1.08403	0.076	0.255	0
Gm13052	0	-0.439147	0.441	0.564	0
Resp18	0	-0.542442	0.523	0.63	0
Lclat1	0	-0.375761	0.572	0.657	0
Neto2	0	-0.536812	0.467	0.583	0
6530403H02Rik	0	-1.12635	0.106	0.286	0
Gbf1	0	-0.495258	0.921	0.89	0
Sgsm2	0	-0.37053	0.525	0.634	0
Icam5	0	-0.319407	0.083	0.263	0
Dock1	0	-0.405157	0.095	0.281	0
Tmx4	0	-0.389169	0.768	0.793	0
Rasal1	0	-0.306954	0.088	0.269	0
Cfap44	0	-0.269176	0.099	0.282	0
Gda	0	-0.569557	0.16	0.332	0
Sulf2	0	-0.334314	0.097	0.278	0
Wdpcp	0	-0.459523	0.393	0.544	0
Dync2h1	0	-0.404834	0.811	0.818	0
Ankrd55	0	-0.473142	0.306	0.472	0
Akap8l	0	-0.308581	0.914	0.891	0
Ptk2	0	-0.354411	0.927	0.904	0
Thra	0	-0.392653	0.76	0.782	0
Cfap54	0	-0.360569	0.253	0.427	0
Pced1b	0	-0.396593	0.508	0.659	0
Cbfb	0	-0.257374	0.066	0.238	0
Gm44593	0	-0.292227	0.024	0.183	0
Usp9x	0	-0.33819	0.902	0.884	0
Grik4	0	-0.599181	0.593	0.667	0
Rps6ka2	0	-0.407107	0.468	0.587	0
Zfp536	0	-0.804311	0.131	0.302	0
Rock1	0	-0.33602	0.902	0.88	0
Cdon	0	-0.307372	0.21	0.387	0
Rit2	0	-0.4603	0.96	0.917	0
Pds5b	0	-0.41583	0.664	0.716	0
Grk4	0	-0.333221	0.221	0.395	0
Lrrc8c	0	-0.313997	0.255	0.431	0
Araf	0	-0.402807	0.687	0.738	0
Ptprn2	0	-0.263419	0.976	0.954	0
Snx30	0	-0.39603	0.487	0.592	0
A830018L16Rik	0	-0.989179	0.55	0.623	0
Lbh	0	-0.281658	0.096	0.269	0
Cdh13	0	-0.918925	0.869	0.774	0
Zfp831	0	-0.2699	0.059	0.225	0
Mboat7	0	-0.303918	0.277	0.444	0
Cntn5	0	-0.933613	0.681	0.772	0
Fto	0	-0.300371	0.915	0.896	0
Lims1	0	-0.377186	0.644	0.719	0
Ngef	0	-0.260937	0.101	0.275	0
Gab2	0	-0.546298	0.819	0.811	0
Gabrb1	0	0.272246	0.983	0.944	0
Tbc1d5	0	-0.433376	0.779	0.792	0
Frmd3	0	-0.416974	0.577	0.669	0
Ndnf	0	-0.417575	0.019	0.169	0
Nova1	0	-0.739535	0.451	0.553	0
Bcl11b	0	-0.471917	0.157	0.324	0
Stim1	0	-0.386057	0.622	0.691	0
Ccdc112	0	-0.270421	0.194	0.369	0
Aplp1	0	-0.458325	0.605	0.685	0
Nagk	0	-0.339933	0.39	0.534	0
Zfyve16	0	-0.329613	0.393	0.529	0
Acadsb	0	-0.377946	0.726	0.761	0
Slc16a11	0	-0.312785	0.181	0.353	0
Fbxo11	0	-0.33933	0.867	0.86	0
Sytl5	0	-0.258832	0.038	0.194	0
Ralgps2	0	-0.367645	0.701	0.737	0
Sntg1	0	-0.392449	0.971	0.949	0
Actn1	0	-0.354864	0.46	0.57	0
Exoc6b	0	-0.296336	0.948	0.933	0
Kdm2a	0	-0.341195	0.852	0.847	0
Pitpnm3	0	-0.360878	0.453	0.581	0
Kcnip1	0	-0.608946	0.184	0.367	0
Hcrtr2	0	-0.402661	0.039	0.194	0
Fam184b	0	-0.273878	0.144	0.314	0
Slc6a11	0	-0.280383	0.077	0.242	0
Cacna1i	0	-0.255698	0.088	0.255	0
Gprin3	0	-0.323239	0.311	0.473	0
Basp1	0	-0.353878	0.898	0.885	0
Cpq	0	-0.832171	0.475	0.558	0
Ptprr	0	-0.452801	0.744	0.753	0
Podxl2	0	-0.432339	0.555	0.632	0
Atxn10	0	-0.321351	0.889	0.871	0
Osbpl10	0	-0.338855	0.538	0.633	0
Ror1	0	-0.281364	0.052	0.213	0
Lrrc8d	0	-0.348508	0.475	0.582	0
AC149090.1	0	-0.272864	0.981	0.968	0
Gm26873	0	-0.271817	0.078	0.236	0
Thsd7b	0	-0.563017	0.347	0.52	0
Pcsk1	0	-0.406744	0.199	0.363	0
Neto1	0	-0.861377	0.27	0.409	0
Supt3	0	-0.365824	0.74	0.759	0
Mob3b	0	-0.777592	0.201	0.348	0
Chic1	0	-0.368289	0.629	0.689	0
Fam78b	0	-0.277275	0.224	0.387	0
Rp9	0	-0.354313	0.645	0.7	0
Igsf3	0	-0.276959	0.125	0.288	0
Diaph1	0	-0.349391	0.43	0.549	0
Itga8	0	-0.370496	0.062	0.217	0
Kcnk2	0	-0.477337	0.418	0.534	0
Ankrd11	0	-0.296907	0.92	0.895	0
Slitrk4	0	-0.265414	0.173	0.336	0
Tex2	0	-0.333764	0.477	0.584	0
Usp34	0	-0.255973	0.964	0.945	0
Epb41l4a	0	-0.517614	0.311	0.45	0
AC159282.1	0	-0.350009	0.155	0.322	0
Mvb12b	0	-0.346713	0.698	0.718	0
9530059O14Rik	0	-0.594091	0.873	0.812	0
Fam120c	0	-0.350677	0.663	0.709	0
Gpr45	0	-0.367436	0.65	0.701	0
Pdk1	0	-0.275163	0.232	0.394	0
Cep70	0	-0.324908	0.54	0.622	0
Pgrmc1	0	-0.38335	0.403	0.531	0
Dnmt3a	0	-0.301721	0.927	0.898	0
Upp2	0	0.256694	0.975	0.92	0
Gfra2	0	-0.275028	0.074	0.227	0
Phc2	0	-0.334513	0.741	0.75	0
Ica1	0	-0.344701	0.918	0.883	0
Man1c1	0	-0.342841	0.349	0.487	0
Mef2a	0	0.262	0.948	0.865	0
Pcdh17	0	-0.59016	0.484	0.608	0
Ubb	0	0.258166	0.98	0.92	0
Ksr2	0	-0.303876	0.925	0.89	0
Mok	0	-0.291721	0.287	0.437	0
Usp25	0	-0.333921	0.374	0.504	0
Fcho2	0	-0.335712	0.722	0.741	0
Vstm2a	0	-0.36621	0.353	0.484	0
Acvr2a	0	-0.470028	0.639	0.672	0
Arsb	0	-0.39994	0.548	0.616	0
Tbc1d1	0	-0.337169	0.345	0.485	0
Slc39a11	0	-0.321413	0.323	0.465	0
Bmper	0	-0.263546	0.056	0.203	0
Rftn1	0	-0.325688	0.097	0.251	0
Igsf11	0	-0.304017	0.056	0.2	0
Grm5	0	-0.713038	0.971	0.915	0
Pcsk5	0	-0.564375	0.156	0.312	0
E130307A14Rik	0	-0.387575	0.753	0.774	0
Ccdc6	0	-0.308003	0.457	0.554	0
Cdc7	0	-0.279373	0.301	0.448	0
Kantr	0	-0.344166	0.561	0.639	0
Ptbp2	0	-0.316359	0.861	0.84	0
Lama3	0	-0.250477	0.082	0.234	0
Ptprk	0	-0.845572	0.647	0.695	0
Kidins220	0	0.255083	0.968	0.921	0
Metap1d	0	-0.341851	0.406	0.526	0
Bend7	0	-0.331356	0.122	0.275	0
Slc16a2	0	-0.42325	0.654	0.694	0
Gabrg1	0	-0.521558	0.118	0.27	0
Tmem91	0	-0.335765	0.369	0.501	0
Plcxd2	0	-0.32623	0.219	0.371	0
Cntln	0	-0.357596	0.698	0.721	0
Rab15	0	-0.284087	0.322	0.468	0
Clip4	0	-0.296052	0.427	0.538	0
Epn2	0	-0.440123	0.691	0.725	0
Myo1d	0	-0.393978	0.462	0.554	0
Ubap1l	0	-0.324984	0.249	0.386	0
Adgrv1	0	-0.477547	0.13	0.275	0
Tet3	0	-0.340465	0.63	0.68	0
Rbm26	0	-0.279148	0.936	0.911	0
Synpr	0	-0.671046	0.111	0.257	0
Soga1	0	-0.32038	0.319	0.45	0
AW554918	0	-0.34098	0.763	0.781	0
Rnpc3	0	-0.353857	0.753	0.758	0
Smoc1	0	-0.271655	0.086	0.235	0
Gm48678	0	-0.349311	0.637	0.691	0
Ubr1	0	-0.319379	0.707	0.732	0
Lepr	0	-0.369471	0.105	0.247	0
Glce	0	-0.374668	0.476	0.585	0
Pigk	0	-0.50203	0.789	0.764	0
Fgfr1	0	-0.352364	0.271	0.403	0
Gm10785	0	-0.327753	0.595	0.659	0
Gm38505	0	-0.429782	0.036	0.166	0
Zfand3	0	-0.283849	0.885	0.854	0
Prdm2	0	-0.323368	0.625	0.667	0
Rap1a	0	-0.330587	0.584	0.649	0
Lypd1	0	-0.411139	0.161	0.307	0
Vkorc1l1	0	-0.304179	0.476	0.575	0
Smad3	0	-0.303981	0.106	0.249	0
Mast3	0	-0.376002	0.223	0.358	0
Cldn34c1	0	-0.271142	0.154	0.303	0
Khdrbs2	0	-0.567051	0.827	0.837	0
Pdcd7	0	-0.321881	0.321	0.444	0
Mdn1	0	-0.291766	0.715	0.727	0
Rimbp2	0	-0.34076	0.885	0.843	0
Cers4	0	-0.314536	0.673	0.719	0
Kmt2e	0	-0.275144	0.926	0.904	0
Arhgap33	0	-0.250848	0.22	0.37	0
Abcb10	0	-0.292337	0.227	0.366	0
Tsc1	0	-0.310801	0.734	0.739	0
Pygb	0	-0.324246	0.454	0.546	0
Lamc1	0	-0.296675	0.389	0.51	0
Zfpm2	0	-1.20567	0.23	0.354	0
Kif21a	0	-0.251844	0.958	0.928	0
Galnt16	0	-0.354079	0.438	0.548	0
Tgfbr3	0	-0.382034	0.403	0.508	0
Mapk1	0	-0.306228	0.842	0.806	0
9530077C05Rik	0	-0.278758	0.286	0.419	0
Tacr3	0	-0.493689	0.075	0.207	0
Rab3b	0	-0.348055	0.081	0.216	0
Nf1	0	-0.269371	0.949	0.928	0
Map4k3	0	-0.310405	0.788	0.779	0
Tbl1x	0	-0.351075	0.738	0.746	0
Fbn1	0	-0.269869	0.184	0.328	0
St5	0	-0.31992	0.291	0.417	0
Rnf121	0	-0.427681	0.644	0.675	0
Meis2	0	-1.11498	0.115	0.246	0
Nalcn	0	-0.289809	0.94	0.923	0
Msi2	0	-0.916649	0.954	0.897	0
Matk	0	-0.328263	0.594	0.651	0
Fdft1	0	-0.275828	0.336	0.469	0
Gm10848	0	-0.260486	0.21	0.348	0
Cyth3	0	-0.326598	0.476	0.555	0
Cdkl2	0	-0.269681	0.423	0.523	0
Zc3h12b	0	-0.341914	0.738	0.749	0
Slc2a3	0	-0.309637	0.621	0.67	0
Rras2	0	-0.280628	0.305	0.43	0
Plppr1	0	-0.49374	0.607	0.662	0
Cystm1	0	-0.268069	0.305	0.44	0
Nos1	0	-0.269541	0.079	0.212	0
Ccnd2	0	-0.296201	0.107	0.242	0
Fam13c	0	-0.325908	0.664	0.688	0
Vcan	0	-0.363532	0.038	0.159	0
Mfsd6	0	-0.363425	0.574	0.622	0
Rimklb	0	-0.280558	0.292	0.419	0
Map2k1	0	-0.328319	0.65	0.678	0
Rnf169	0	-0.333935	0.599	0.652	0
Sec61a2	0	-0.268045	0.803	0.789	0
Gm11099	0	-0.309126	0.314	0.445	0
Itm2c	0	-0.39032	0.527	0.607	0
Pbdc1	0	-0.453873	0.454	0.525	0
Fam196b	0	-0.38486	0.259	0.39	0
Shisa7	0	-0.265343	0.297	0.425	0
Ash1l	0	-0.269662	0.907	0.882	0
Aldh1a1	0	-0.782195	0.109	0.238	0
Plce1	0	-0.343627	0.118	0.253	0
Fbxo10	0	-0.311226	0.489	0.572	0
Plxna2	0	-0.374327	0.754	0.74	0
Hmbox1	0	-0.3014	0.767	0.753	0
Col23a1	0	-0.331067	0.063	0.189	0
Srsf10	0	-0.300191	0.719	0.737	0
Supt20	0	-0.315324	0.615	0.665	0
Hs3st2	0	-0.294531	0.033	0.149	0
Ptprg	0	-0.439228	0.956	0.903	0
Gsk3b	0	-0.272621	0.939	0.912	0
Mras	0	-0.289172	0.429	0.524	0
Bscl2	0	-0.279347	0.371	0.482	0
Bach2	0	-0.450048	0.783	0.777	0
Mllt3	0	-0.342584	0.907	0.855	0
Spindoc	0	-0.270654	0.456	0.549	0
Cabp1	0	-0.343635	0.28	0.395	0
Tjp1	0	-0.263664	0.962	0.929	0
Stx16	0	-0.314224	0.8	0.782	0
Sos2	0	-0.311121	0.603	0.655	0
Rragb	0	-0.298201	0.528	0.598	0
Gad2	0	-0.772319	0.166	0.289	0
Adra1a	0	-0.364469	0.093	0.217	0
Ddx5	0	-0.310351	0.94	0.914	0
D3Ertd751e	0	-0.34214	0.572	0.619	0
Zfp521	0	-0.583255	0.302	0.396	0
Gnas	0	-0.436702	0.974	0.951	0
Pantr1	0	-0.268951	0.172	0.306	0
Pcmtd1	0	-0.306103	0.776	0.77	0
Cep170	0	-0.284739	0.792	0.786	0
Mthfs	0	-0.343634	0.487	0.565	0
Babam2	0	-0.315806	0.764	0.762	0
Gm10754	0	-0.433393	0.125	0.248	0
Fam117b	0	-0.294395	0.635	0.674	0
Limch1	0	-0.334061	0.909	0.873	0
Crocc	0	-0.268501	0.305	0.424	0
Nrxn2	0	-0.291939	0.888	0.86	0
Tcaf1	0	-0.265317	0.886	0.862	0
Rspo2	0	-0.296172	0.043	0.155	0
Trpm7	0	-0.26817	0.854	0.839	0
Tcerg1l	0	-0.32618	0.103	0.229	0
Zfp40	0	-0.250753	0.37	0.476	0
Xpo1	0	-0.310973	0.678	0.7	0
Dok5	0	-0.321072	0.357	0.457	0
Rmst	0	-0.924537	0.406	0.502	0
Mdga1	0	-0.251989	0.076	0.195	0
Sulf1	0	-0.467548	0.117	0.245	0
Ttc39c	0	-0.278962	0.418	0.512	0
Prrc2c	0	-0.31801	0.912	0.887	0
Cdh20	0	-0.833622	0.378	0.455	0
Stac	0	-0.262065	0.06	0.175	0
Cnrip1	0	-0.297401	0.687	0.701	0
Clvs2	0	-0.326531	0.76	0.752	0
Hdac7	0	-0.296606	0.461	0.539	0
AC165271.1	0	-0.279916	0.207	0.323	0
Tmod2	0	-0.279205	0.808	0.799	0
Wasf3	0	-0.374528	0.727	0.708	0
Sobp	0	-0.328922	0.93	0.888	0
Slc8a1	0	-0.372571	0.975	0.945	0
Scaper	0	-0.250805	0.935	0.903	0
Wipf3	0	-0.368458	0.495	0.548	0
Slc25a13	0	-0.255968	0.103	0.226	0
Pvt1	0	-0.396327	0.621	0.646	0
Arhgap10	0	-0.300842	0.147	0.269	0
Whrn	0	-0.429381	0.337	0.424	0
Pak7	0	-0.378442	0.774	0.789	0
Scg2	0	-0.656282	0.627	0.631	0
Eefsec	0	-0.291091	0.507	0.574	0
Mga	0	-0.297806	0.683	0.703	0
3300002A11Rik	0	-0.546723	0.292	0.406	0
Hacd3	0	-0.288888	0.684	0.703	0
9530026P05Rik	0	-0.784431	0.246	0.347	0
Klhl7	0	-0.279783	0.78	0.777	0
Vgll4	0	-0.303855	0.312	0.417	0
Mest	0	-0.276066	0.269	0.381	0
Hs3st4	0	-0.793569	0.321	0.429	0
Fbxl12	0	-0.268481	0.442	0.522	0
Gm20275	0	-0.261445	0.822	0.802	0
Lancl1	0	-0.293885	0.636	0.663	0
Airn	0	-0.407074	0.36	0.462	0
Ccdc66	0	-0.28525	0.542	0.597	0
Spred2	0	-0.328125	0.772	0.738	0
Dzip1	0	-0.296227	0.612	0.636	0
Jph4	0	-0.279184	0.57	0.616	0
Zwint	0	-0.278438	0.927	0.896	0
2210408I21Rik	0	-0.276805	0.904	0.871	0
Cdc42bpb	0	-0.259986	0.622	0.654	0
Otof	0	-0.2674	0.053	0.158	0
Bicra	0	-0.250773	0.424	0.516	0
Csmd3	0	-0.271512	0.98	0.963	0
Kcnk10	0	-0.317166	0.461	0.54	0
Adcy9	0	-0.34868	0.807	0.766	0
Sec24b	0	-0.260161	0.843	0.812	0
Kcnk13	0	-0.278303	0.07	0.181	0
Ptgds	0	-0.34814	0.46	0.294	0
Rai14	0	-0.2516	0.089	0.199	0
Nfix	0	-0.319141	0.163	0.273	0
Pitpnm2	0	-0.287295	0.533	0.583	0
Ubr4	0	-0.406916	0.658	0.647	0
Rtl4	0	-0.523282	0.481	0.573	0
Plxna1	0	-0.250251	0.293	0.396	0
Slc12a2	0	-0.308995	0.403	0.489	0
Satb2	0	-0.454295	0.063	0.166	0
Gm30382	0	-0.42871	0.364	0.484	0
Vsnl1	0	-0.450982	0.958	0.903	0
Abl2	0	-0.277704	0.765	0.744	0
Esr1	0	-0.283338	0.12	0.23	0
Gm17276	0	-0.302015	0.561	0.595	0
Ube2h	0	-0.274104	0.857	0.829	0
Xist	0	-0.276421	0.964	0.948	0
Mttp	0	-0.265981	0.348	0.447	0
Cblb	0	-0.294075	0.506	0.563	0
B230217J21Rik	0	-0.262023	0.069	0.17	0
Arhgap31	0	-0.255471	0.047	0.144	0
Usp24	0	-0.29059	0.753	0.743	0
Camkmt	0	-0.291946	0.817	0.81	0
Gm21954	0	-0.276579	0.364	0.452	0
Smc6	0	-0.294926	0.692	0.693	0
Sipa1l3	0	-0.301323	0.629	0.648	0
Xrn1	0	-0.253973	0.836	0.813	0
Gatsl2	0	-0.261818	0.477	0.544	0
Tbc1d9	0	-0.256352	0.54	0.587	0
Smarcc1	0	-0.253322	0.699	0.697	0
Dpf3	0	-0.277636	0.118	0.226	0
Unc5d	0	-1.48336	0.705	0.623	0
Ptprn	0	-0.319145	0.929	0.895	0
Glis3	0	-0.390376	0.043	0.134	0
Ptpra	0	-0.256522	0.797	0.777	0
Reln	0	-0.581455	0.084	0.182	0
Acp1	0	-0.283458	0.638	0.656	0
Lpgat1	0	-0.280009	0.801	0.771	0
Pgap1	0	-0.328277	0.638	0.657	0
Pde3b	0	-0.297786	0.597	0.632	0
Iqsec2	0	-0.320095	0.677	0.662	0
Slc32a1	0	-0.255211	0.073	0.17	0
Mpp7	0	-0.366197	0.437	0.483	0
Nrp1	0	-0.624741	0.313	0.385	0
Greb1l	0	-0.434378	0.576	0.595	0
Setbp1	0	-0.298015	0.917	0.887	0
Cnot6l	0	-0.256484	0.651	0.669	0
Ankrd44	0	-0.30216	0.391	0.475	0
Asic2	0	-1.2054	0.941	0.833	0
Cers5	0	-0.254667	0.656	0.678	0
Pxk	0	-0.262369	0.676	0.671	0
Gm28928	0	-1.64995	0.216	0.312	0
Lmbrd1	0	-0.259757	0.735	0.726	0
Zfp609	0	-0.256017	0.842	0.817	0
Ebf2	0	-0.488898	0.023	0.102	0
Btbd7	0	-0.250199	0.847	0.807	0
Klhl13	0	-0.45385	0.405	0.452	0
Ank1	0	-0.373165	0.762	0.693	0
Add2	0	-0.271261	0.808	0.774	0
Clcn5	0	-0.257796	0.297	0.388	0
Kcnt1	0	-0.272673	0.541	0.579	0
Celf5	0	-0.285251	0.653	0.66	0
Rhoq	0	-0.286772	0.339	0.424	0
Dscam	0	-0.25429	0.979	0.929	0
C1ql3	0	-0.525755	0.216	0.306	0
Mpdz	0	-0.273817	0.656	0.667	0
Hdac11	0	-0.26999	0.556	0.586	0
Klhdc10	0	-0.253335	0.925	0.882	0
Syt4	0	-0.317873	0.59	0.616	0
B230209E15Rik	0	-0.296308	0.698	0.721	0
Tspan7	0	-0.339021	0.878	0.839	0
Ophn1	0	-0.258351	0.669	0.673	0
Usp40	0	-0.259213	0.687	0.686	0
Arhgef12	0	-0.262971	0.904	0.867	0
Dach1	0	-0.700186	0.187	0.276	0
Meis1	0	-0.258804	0.07	0.159	0
Gm16168	0	-0.320344	0.164	0.263	0
Tcf12	0	-0.379274	0.902	0.865	0
Msantd2	0	-0.251204	0.618	0.628	0
Lmo4	0	-0.389079	0.511	0.524	0
Tcp11l1	0	-0.273633	0.715	0.694	0
Hnrnpll	0	-0.264235	0.533	0.558	0
Gtdc1	0	-0.352873	0.758	0.728	0
Pip5k1b	0	-0.374935	0.794	0.737	0
Plekhg5	0	-0.251309	0.282	0.365	0
Foxn3	0	-0.310048	0.893	0.853	0
Sesn3	0	-0.275626	0.648	0.649	0
C130073E24Rik	0	-0.452172	0.384	0.488	0
Col8a1	0	-0.261492	0.103	0.194	0
Stim2	0	-0.304645	0.542	0.56	0
Rassf8	0	-0.255394	0.564	0.602	0
Gm5577	0	-0.25723	0.507	0.548	0
Gm45846	0	-0.289755	0.727	0.691	0
Otx2os1	0	-0.352018	0.046	0.121	0
Tbc1d12	0	-0.253744	0.679	0.672	0
Ankrd33b	0	-0.253669	0.108	0.194	0
Kcnd3	0	-0.631083	0.938	0.868	0
Utrn	0	-0.427296	0.27	0.353	0
Kif16b	0	-0.250524	0.693	0.671	0
Pde1c	0	-0.448001	0.225	0.307	0
Kctd8	0	-0.710075	0.203	0.287	0
Dner	0	-0.271928	0.87	0.832	0
Akap7	0	-0.253528	0.561	0.582	0
Grin3a	0	-0.418828	0.49	0.556	0
Mbp	0	-0.520978	0.387	0.446	0
Hmgn3	0	-0.254088	0.718	0.701	0
Sema5b	0	-0.402623	0.131	0.213	0
Tmeff2	0	-0.462899	0.93	0.891	0
4933406I18Rik	0	-0.259802	0.816	0.782	0
Aff2	0	-0.44816	0.772	0.728	0
Gab1	0	-0.294205	0.096	0.174	0
Gm20696	0	-0.259829	0.7	0.698	0
Ctnna3	0	-0.376119	0.904	0.843	0
5031439G07Rik	0	-0.250868	0.735	0.714	0
Clgn	0	-0.339419	0.421	0.448	0
Zfp462	0	-0.289546	0.868	0.806	0
Xrcc4	0	-0.253932	0.498	0.541	0
Cdh18	0	-0.664072	0.96	0.897	0
Mboat1	0	-0.259053	0.133	0.204	0
Spag16	0	-0.26675	0.179	0.254	0
Fam189a1	0	-0.325363	0.934	0.832	0
Cyth1	0	-0.267049	0.734	0.687	0
Usp46	0	-0.250781	0.583	0.58	0
Kif26b	0	-0.392395	0.773	0.678	0
Zfp804b	0	-0.320207	0.587	0.458	0
Klhl32	0	-0.311158	0.842	0.75	0
Tac1	0	-0.257487	0.046	0.105	0
Mid1	0	-0.322646	0.301	0.36	0
Lrrtm3	0	-0.304665	0.874	0.8	0
Xpr1	0	-0.251751	0.792	0.747	0
Homer1	0	-0.378184	0.693	0.651	0
Arl6ip1	0	-0.264258	0.632	0.628	0
Fgf10	0	-0.268257	0.131	0.202	0
Gnai1	0	-0.256325	0.723	0.686	0
Gm26936	0	-0.279322	0.366	0.397	0
Klhl29	0	-0.274068	0.932	0.855	0
CT025619.1	0	-0.261213	0.932	0.868	0
Ebf1	0	-0.685579	0.469	0.309	0
Fhit	0	-0.267514	0.931	0.879	0
Tiam1	0	-0.284149	0.81	0.759	0
Phka1	0	-0.275524	0.596	0.569	0
Gpc5	0	-1.01398	0.458	0.492	0
Npsr1	0	-0.270797	0.083	0.143	0
Gm1604a	0	-0.305778	0.405	0.425	0
Gad1	0	-0.449108	0.195	0.248	0
Nrgn	0	-0.401294	0.583	0.566	0
Grid2	0	-0.354248	0.978	0.868	0
Ptprz1	0	-0.705103	0.877	0.737	0
Oprm1	0	0.263667	0.46	0.392	0
4930555F03Rik	0	-0.317399	0.296	0.359	0
Mirg	0	-0.263664	0.944	0.874	0
Plpp4	0	-0.389674	0.181	0.229	0
D030068K23Rik	0	0.273406	0.411	0.356	0
Myo16	0	-0.425929	0.541	0.511	0
Htr2c	0	-1.09044	0.535	0.503	0
Cobl	0	-0.266431	0.708	0.644	0
Apba1	0	-0.585511	0.969	0.93	0
Zfp697	0	-0.278691	0.627	0.596	0
Apoe	0	-0.251829	0.379	0.293	0
Pcdh11x	0	-0.602333	0.588	0.45	0
Bcl11a	0	-0.506046	0.533	0.473	0
Pappa	0	-0.347971	0.219	0.246	0
Car10	0	-0.310163	0.874	0.603	0
Vwc2l	0	-0.415386	0.823	0.595	0
Slc7a14	0	-0.328801	0.634	0.531	0
Grip1	0	-0.447771	0.972	0.931	0
Tmem132d	0	-0.380136	0.435	0.426	0
Npas3	0	-0.770539	0.844	0.632	0
Nectin3	0	-0.256747	0.405	0.397	0
Ust	0	-0.250033	0.411	0.31	0
Elavl2	0	-0.355115	0.956	0.854	0
Ammecr1	0	-0.320523	0.787	0.668	0
Gm15155	0	-0.261285	0.45	0.443	0
Tmem117	0	-0.261941	0.909	0.802	0
Clstn2	0	-0.645338	0.964	0.853	0
Gm3764	0	-0.317883	0.276	0.281	0
Grm3	0	-0.26323	0.634	0.509	0
Plp1	0	-0.647317	0.363	0.306	0
Scd2	0	-0.269744	0.628	0.575	0
Ak5	0	-0.394144	0.786	0.583	0
Cartpt	0	-0.28341	0.119	0.134	1
Hs3st5	0	-0.55364	0.672	0.584	1
Brinp3	0	-0.616331	0.792	0.695	1
Tle4	0	-0.274306	0.649	0.569	1
Gm32647	0	-0.663717	0.54	0.461	1
Cadm2	0	-0.254058	0.99	0.982	1
Tead1	0	-0.287469	0.463	0.423	1
Nr3c2	0	-0.300869	0.905	0.803	1
Thrb	0	-0.36126	0.895	0.742	1
Sntg2	0	-0.273452	0.262	0.256	1
Nfib	0	-0.932478	0.511	0.389	1
Chsy3	1	-0.354418	0.587	0.511	1
Pdzrn3	1	-0.481744	0.321	0.286	1
Cst3	1	-0.320253	0.723	0.644	1

## Sheet: c_6
Column1	p_val	avg_log2FC	pct.1	pct.2	p_val_adj
Sulf1	0	1.41317	0.836	0.205	0
Kcnq5	0	0.398928	0.973	0.673	0
Rims1	0	-0.697789	0.992	0.964	0
Tmeff2	0	0.496195	0.994	0.888	0
Pard3b	0	2.67997	0.98	0.322	0
Pard3bos1	0	0.905067	0.604	0.063	0
Nrp2	0	0.73841	0.811	0.37	0
Zdbf2	0	0.684509	0.798	0.529	0
Erbb4	0	-2.94077	0.474	0.727	0
Spag16	0	0.576188	0.479	0.237	0
Epha4	0	-1.03362	0.247	0.589	0
Scg2	0	0.465718	0.849	0.619	0
Sphkap	0	-1.33089	0.307	0.723	0
Armc9	0	0.503793	0.898	0.764	0
Agap1	0	0.429629	0.967	0.899	0
St8sia4	0	0.846285	0.63	0.223	0
Pam	0	1.00472	0.995	0.914	0
Cntnap5b	0	0.864589	0.901	0.677	0
Cntnap5a	0	0.974614	0.976	0.85	0
Tmem163	0	0.435761	0.765	0.453	0
Kcnt2	0	-1.16095	0.214	0.52	0
Brinp3	0	1.2522	0.97	0.686	0
Rgl1	0	0.62304	0.89	0.676	0
Brinp2	0	-0.808234	0.358	0.662	0
Lmx1a	0	0.716129	0.782	0.275	0
Nos1ap	0	-1.55459	0.399	0.807	0
Cfap45	0	0.268472	0.268	0.057	0
Celf2	0	0.321152	0.998	0.966	0
Cubn	0	0.501179	0.378	0.112	0
Plxdc2	0	2.24172	0.977	0.538	0
Enkur	0	0.29874	0.279	0.046	0
Ccdc187	0	0.67161	0.552	0.059	0
Lrp1b	0	1.17254	1	0.97	0
Tanc1	0	-0.770582	0.04	0.37	0
Slc4a10	0	-0.577882	0.827	0.894	0
Kcnh7	0	1.09446	0.983	0.661	0
Myo3b	0	0.745903	0.489	0.123	0
Zfp385b	0	-1.51525	0.275	0.644	0
Zfp804a	0	1.41941	0.955	0.681	0
Fmn1	0	-1.2639	0.113	0.714	0
Sema6d	0	-2.44347	0.429	0.834	0
9030622O22Rik	0	-1.23265	0.041	0.353	0
Nnat	0	0.526256	0.917	0.678	0
Zfp831	0	0.425785	0.502	0.2	0
Cdh4	0	0.712793	0.938	0.682	0
Tspan7	0	0.584763	0.935	0.836	0
Gria3	0	-1.09047	0.775	0.891	0
Gpc3	0	1.42555	0.537	0.113	0
A630012P03Rik	0	0.47498	0.304	0.041	0
Fgf13	0	0.885025	0.913	0.759	0
Pnma3	0	0.392935	0.489	0.239	0
Il1rapl1	0	1.11544	0.998	0.912	0
Ar	0	1.50205	0.866	0.421	0
Nexmif	0	1.29567	0.977	0.791	0
Pcdh11x	0	2.38128	0.938	0.432	0
Il1rapl2	0	0.99928	0.859	0.607	0
Mum1l1	0	0.563226	0.522	0.141	0
Rnf128	0	0.607077	0.561	0.244	0
Tbc1d8b	0	0.367682	0.3	0.084	0
Pih1h3b	0	0.321616	0.268	0.03	0
Frmpd3	0	0.686114	0.795	0.484	0
Irs4	0	0.539475	0.443	0.034	0
Htr2c	0	2.24035	0.994	0.478	0
Sh3kbp1	0	0.8512	0.904	0.727	0
Glra2	0	0.562229	0.598	0.281	0
Frmpd4	0	0.503389	0.975	0.776	0
Fndc3b	0	0.504942	0.801	0.591	0
Lhfp	0	-1.04355	0.067	0.431	0
Kcnab1	0	-1.35003	0.299	0.6	0
Gm20754	0	1.33339	0.877	0.478	0
4930509J09Rik	0	0.872154	0.684	0.307	0
Zbbx	0	0.807685	0.6	0.146	0
Fstl5	0	1.4243	0.972	0.631	0
Pdgfc	0	0.658002	0.725	0.416	0
Dchs2	0	0.467282	0.577	0.297	0
Kcnd3	0	-1.5414	0.761	0.878	0
Pifo	0	0.325155	0.351	0.127	0
Gm42722	0	0.439882	0.47	0.164	0
5330417C22Rik	0	0.7552	0.921	0.737	0
Vav3	0	-1.23435	0.117	0.49	0
Ntng1	0	1.13589	0.99	0.67	0
Dpyd	0	1.20411	0.984	0.745	0
Ptbp2	0	0.514695	0.929	0.837	0
Fnbp1l	0	0.762909	0.952	0.728	0
Pitx2	0	0.28241	0.252	0.022	0
Unc5c	0	1.3229	0.998	0.918	0
Adgrl2	0	1.05266	0.909	0.625	0
Negr1	0	1.1995	0.999	0.954	0
Necab1	0	0.454108	0.858	0.481	0
Grin3a	0	1.23963	0.861	0.535	0
E130308A19Rik	0	0.575854	0.834	0.631	0
Nfib	0	-1.49126	0.087	0.413	0
Bnc2	0	-1.4265	0.064	0.379	0
Adamtsl1	0	-2.09824	0.162	0.565	0
Slc24a2	0	-1.96054	0.412	0.88	0
Mllt3	0	-0.75185	0.676	0.867	0
Focad	0	-0.686967	0.703	0.856	0
Lepr	0	1.02885	0.778	0.21	0
6430628N08Rik	0	0.302894	0.249	0.011	0
Ccdc30	0	0.662342	0.858	0.651	0
Csmd2	0	-1.22899	0.736	0.866	0
Vwa5b1	0	0.953556	0.794	0.209	0
Cdk14	0	-1.55906	0.763	0.939	0
Cacna2d1	0	1.32762	0.997	0.862	0
Cd36	0	0.598131	0.428	0.056	0
Lhfpl3	0	1.09731	0.995	0.813	0
Dpp6	0	0.450701	0.999	0.966	0
Drc1	0	0.415708	0.484	0.213	0
Ldb2	0	1.33804	0.973	0.563	0
Pcdh7	0	1.56107	0.998	0.907	0
Gabrg1	0	1.60592	0.903	0.227	0
Gabra2	0	1.05392	0.977	0.664	0
Gabrb1	0	0.682406	0.996	0.943	0
Fryl	0	-0.929947	0.515	0.818	0
Lnx1	0	-0.533606	0.318	0.653	0
C530008M17Rik	0	0.507095	0.893	0.637	0
Adgrl3	0	1.24775	0.998	0.963	0
Epha5	0	-1.01037	0.921	0.917	0
Fras1	0	0.821048	0.866	0.441	0
Rasgef1b	0	-0.957282	0.714	0.854	0
Cplx1	0	-0.752153	0.338	0.636	0
Ttc28	0	0.965256	0.969	0.708	0
Nos1	0	1.14545	0.79	0.172	0
Calcr	0	0.78965	0.291	0.03	0
Peg10	0	0.515761	0.424	0.1	0
Ppp1r9a	0	0.625732	0.963	0.901	0
Tac1	0	1.74369	0.817	0.063	0
Nxph1	0	2.80946	0.998	0.428	0
Foxp2	0	0.900896	0.968	0.61	0
Gm4876	0	0.880936	0.846	0.433	0
Cttnbp2	0	-0.913966	0.785	0.884	0
Grm8	0	1.20805	0.982	0.56	0
Cntnap2	0	-1.39929	0.983	0.969	0
Mpp6	0	-0.763148	0.328	0.653	0
Gsdme	0	-0.780917	0.409	0.705	0
Snca	0	-1.43504	0.255	0.771	0
Grid2	0	0.747663	0.998	0.868	0
Fgd5	0	0.476761	0.464	0.126	0
Cntn6	0	-1.08762	0.294	0.647	0
Cntn4	0	-1.7136	0.565	0.775	0
Atp2b2	0	-0.699211	0.811	0.893	0
Hrh1	0	0.26182	0.279	0.074	0
Gucy2c	0	0.475417	0.481	0.216	0
Rerg	0	0.549429	0.711	0.414	0
Plekha5	0	-0.637047	0.913	0.935	0
Tmtc1	0	0.773613	0.901	0.653	0
Zim1	0	0.514122	0.652	0.311	0
Usp29	0	0.924191	0.993	0.88	0
Ryr1	0	0.373112	0.372	0.088	0
Nell1	0	0.595432	0.942	0.521	0
Ano5	0	0.483064	0.529	0.198	0
Slc17a6	0	0.798681	0.785	0.283	0
Gabrg3	0	0.621217	0.965	0.66	0
A230006K03Rik	0	-0.6097	0.906	0.891	0
B230209E15Rik	0	0.556196	0.868	0.711	0
Apba2	0	-0.814465	0.564	0.792	0
Fam189a1	0	-1.33107	0.491	0.857	0
Igf1r	0	-1.05992	0.318	0.79	0
Slco3a1	0	-0.923255	0.513	0.8	0
Ntrk3	0	0.557909	0.99	0.854	0
Grm5	0	0.877004	0.998	0.914	0
Dlg2	0	0.499655	1	0.985	0
Gm32647	0	2.07905	0.971	0.439	0
Tenm4	0	0.692665	0.985	0.838	0
Plekha7	0	0.505754	0.883	0.659	0
Syt17	0	-0.871729	0.212	0.581	0
Vwa3a	0	0.310465	0.332	0.106	0
Mfsd13b	0	0.324136	0.288	0.039	0
Adam12	0	1.175	0.787	0.287	0
Tcerg1l	0	0.496771	0.535	0.205	0
Th	0	-1.09552	0.11	0.423	0
Ust	0	1.01397	0.706	0.295	0
Samd5	0	0.543254	0.803	0.569	0
Gm28905	0	1.75161	0.988	0.615	0
Adgb	0	0.397558	0.376	0.124	0
Plagl1	0	0.367208	0.385	0.148	0
Phactr2	0	0.649242	0.811	0.495	0
Ahi1	0	0.680964	0.998	0.966	0
Scml4	0	0.720351	0.782	0.438	0
Grik2	0	1.22502	0.999	0.954	0
Pcdh15	0	0.923195	0.997	0.875	0
Gm15398	0	0.747559	0.883	0.623	0
Gm48485	0	0.766678	0.57	0.028	0
Rmst	0	1.10356	0.904	0.475	0
Mgat4c	0	1.53103	0.996	0.826	0
Tmtc2	0	-1.13531	0.264	0.61	0
Syt1	0	-1.44166	0.993	0.973	0
Grip1	0	1.37695	0.999	0.93	0
Grip1os2	0	0.429166	0.523	0.251	0
D930020B18Rik	0	0.316173	0.277	0.053	0
Fam19a2	0	1.17475	0.948	0.571	0
Nrg1	0	-1.97675	0.898	0.926	0
Sgcz	0	1.51657	1	0.888	0
Zdhhc2	0	0.486635	0.925	0.784	0
4930555F03Rik	0	0.497584	0.666	0.338	0
Gm45321	0	0.474204	0.586	0.284	0
Gm45323	0	0.487302	0.615	0.297	0
C130073E24Rik	0	0.618091	0.844	0.462	0
Wdr17	0	0.753861	0.921	0.722	0
Glra3	0	1.26884	0.916	0.484	0
Galntl6	0	1.57999	0.999	0.9	0
Gm26905	0	1.33244	0.979	0.678	0
March1	0	1.00952	0.99	0.847	0
Cacna1a	0	-0.650801	0.983	0.955	0
Irx5	0	0.505416	0.398	0.02	0
Cdh11	0	-1.15042	0.574	0.768	0
Adamts18	0	0.676545	0.509	0.106	0
Vat1l	0	0.867409	0.915	0.597	0
Cdh13	0	-1.31563	0.578	0.791	0
Pard3	0	1.08902	0.957	0.631	0
Nrp1	0	0.524811	0.779	0.359	0
Cadps	0	-0.675272	0.979	0.963	0
Nek10	0	0.661	0.599	0.208	0
Thrb	0	1.35077	0.985	0.739	0
Gm48321	0	0.644116	0.636	0.302	0
Dnah12	0	0.449057	0.355	0.054	0
Erc2	0	-1.38911	0.995	0.969	0
Nrg3	0	0.559038	0.999	0.977	0
Slc35f4	0	-0.878872	0.38	0.679	0
Msra	0	-1.40357	0.248	0.727	0
Mir124a-1hg	0	-1.00398	0.538	0.827	0
Fndc3a	0	0.541501	0.936	0.763	0
Pcdh17	0	1.33301	0.954	0.582	0
Gpc6	0	-2.64669	0.325	0.786	0
Mbnl2	0	0.407055	0.965	0.898	0
Dync2h1	0	0.649087	0.931	0.812	0
Cntn5	0	0.533896	0.986	0.755	0
Sesn3	0	0.500556	0.803	0.64	0
Fat3	0	0.901671	0.976	0.843	0
Npsr1	0	2.18621	0.865	0.101	0
AW551984	0	0.483818	0.563	0.231	0
Cadm1	0	0.586455	0.998	0.891	0
Arhgap20	0	0.734942	0.819	0.588	0
Car12	0	0.30155	0.342	0.123	0
Rora	0	-1.17739	0.912	0.949	0
Hcrtr2	0	0.961104	0.644	0.16	0
Esyt3	0	0.338101	0.34	0.077	0
Tmem108	0	0.503925	0.968	0.854	0
Arpp21	0	0.322606	0.983	0.601	0
Scn5a	0	0.488146	0.454	0.115	0
9530059O14Rik	0	-1.92076	0.334	0.841	0
Gck	0	0.565031	0.53	0.095	0
Adcy1	0	-0.584994	0.216	0.583	0
Vwc2	0	0.650385	0.65	0.33	0
Spred2	0	-0.623418	0.431	0.757	0
Bcl11a	0	0.860919	0.921	0.453	0
Ccdc85a	0	1.09287	0.99	0.887	0
Kcnip1	0	0.271477	0.69	0.338	0
Tenm2	0	0.66563	1	0.936	0
Sgcd	0	0.963418	0.996	0.888	0
Adamts2	0	1.41573	0.895	0.236	0
Map2k4	0	0.603467	0.976	0.901	0
Efnb3	0	0.382195	0.571	0.286	0
6330403K07Rik	0	0.55827	0.831	0.603	0
Dhx40	0	0.505168	0.664	0.419	0
Msi2	0	-1.29506	0.857	0.903	0
Car10	0	0.502	0.967	0.601	0
Hap1	0	0.746439	0.909	0.609	0
Stat3	0	0.63057	0.648	0.406	0
Prkca	0	-1.48374	0.812	0.84	0
Cep112	0	1.19542	0.878	0.45	0
Rgs9	0	0.482945	0.631	0.249	0
Adarb2	0	-3.47124	0.356	0.705	0
Chrm3	0	0.775475	0.847	0.527	0
Ripor2	0	0.4824	0.853	0.606	0
A330102I10Rik	0	0.552537	0.765	0.47	0
Edil3	0	1.34747	0.99	0.586	0
Pde8b	0	0.814192	0.94	0.631	0
Sv2c	0	-1.53444	0.175	0.471	0
Gzmk	0	0.758685	0.606	0.161	0
Klhl29	0	-1.10118	0.697	0.868	0
Atp6v1c2	0	0.331409	0.301	0.044	0
Sntg2	0	1.24398	0.823	0.226	0
Hdac9	0	-1.30216	0.914	0.921	0
Immp2l	0	-0.855235	0.746	0.881	0
Ttc6	0	0.639788	0.822	0.396	0
Lrfn5	0	0.543367	0.996	0.95	0
Kcnh5	0	0.769726	0.711	0.338	0
Nrxn3	0	-3.9259	0.785	0.976	0
3300002A11Rik	0	0.564441	0.732	0.381	0
Dlk1	0	-1.0306	0.135	0.445	0
Rapgef5	0	-1.22527	0.314	0.767	0
Plcxd3	0	0.62631	0.947	0.723	0
Egflam	0	0.954097	0.588	0.063	0
Prlr	0	0.275345	0.446	0.162	0
Adamts12	0	0.432939	0.319	0.053	0
Fbxl7	0	-1.27232	0.255	0.568	0
Ctnnd2	0	0.352857	0.997	0.972	0
Oxr1	0	-1.75846	0.565	0.749	0
Csmd3	0	0.584225	0.999	0.962	0
Cacna1i	0	0.473359	0.555	0.229	0
Syt10	0	0.466402	0.457	0.148	0
Cpne8	0	0.805913	0.806	0.474	0
Efcab1	0	0.621571	0.744	0.438	0
Etv5	0	-0.746238	0.168	0.512	0
St6gal1	0	-0.524883	0.031	0.378	0
Il1rap	0	-1.20965	0.283	0.683	0
Igsf11	0	0.396328	0.454	0.178	0
Nectin3	0	0.893454	0.806	0.376	0
Robo2	0	-1.27634	0.846	0.869	0
Grik1	0	-1.70888	0.118	0.512	0
Ttc3	0	0.512539	0.998	0.974	0
B3galt5	0	0.495705	0.561	0.251	0
Tmem181a	0	0.473708	0.962	0.884	0
Gm26848	0	0.527456	1	0.972	0
Gm1604a	0	0.69441	0.788	0.404	0
Baiap3	0	1.33781	0.946	0.293	0
Axin1	0	0.530856	0.747	0.548	0
Rftn1	0	0.526246	0.604	0.222	0
Satb1	0	0.763795	0.786	0.484	0
Rfx2	0	0.27278	0.276	0.063	0
Ptprm	0	1.10925	0.819	0.424	0
Crim1	0	1.17367	0.921	0.598	0
Slc8a1	0	0.556162	0.992	0.945	0
Adcyap1	0	0.375095	0.344	0.061	0
Svil	0	0.373613	0.335	0.114	0
Greb1l	0	0.478799	0.818	0.582	0
Dsg2	0	0.281661	0.245	0.049	0
Stk32a	0	0.61048	0.513	0.09	0
Kcnn2	0	-1.01057	0.542	0.788	0
Sema6a	0	0.600831	0.71	0.402	0
Tcf4	0	-1.64808	0.596	0.815	0
Dcc	0	-1.4311	0.912	0.922	0
Syt7	0	-1.04352	0.364	0.776	0
Trpm3	0	0.609707	0.988	0.77	0
Sorcs3	0	1.1851	0.985	0.603	0
Sorcs1	0	1.26852	0.929	0.568	0
Gfra1	0	-1.28705	0.105	0.437	0
Ebf3	0	-1.07977	0.037	0.344	0
Runx2	0	-0.622032	0.268	0.585	0
Map7	0	0.409988	0.885	0.748	0
Ptprz1	0	0.328003	0.967	0.733	0
Lrrc9	0	0.348294	0.438	0.194	0
Ksr2	0	0.429108	0.969	0.888	0
Cacng4	0	0.372824	0.606	0.323	0
Gstz1	0	0.471184	0.733	0.534	0
Adra1a	0	0.401943	0.45	0.196	0
Mob3b	0	-0.93698	0.051	0.355	0
Ctnna1	0	-0.733118	0.207	0.52	0
Ak5	0	0.319985	0.9	0.579	0
Psd2	0	0.377192	0.613	0.349	0
Drd2	0	-1.01012	0.085	0.383	0
Nfia	0	-0.97177	0.074	0.383	0
Me3	0	-0.70967	0.618	0.767	0
Rasal1	0	0.342804	0.512	0.245	0
C230004F18Rik	0	0.367837	0.996	0.954	0
Pcsk1n	0	0.589295	0.957	0.894	0
Map3k5	0	0.464524	0.783	0.563	0
A330015K06Rik	0	-0.746766	0.117	0.423	0
Sox5	0	-1.42127	0.145	0.434	0
Zfpm2	0	-1.44916	0.063	0.362	0
Gm13963	0	-0.361942	0.025	0.323	0
Mcc	0	-1.39703	0.386	0.627	0
Agbl4	0	0.398582	0.997	0.953	0
Lrrtm4	0	0.576147	0.986	0.874	0
Smyd3	0	0.434949	0.977	0.91	0
Cdkl5	0	-0.678925	0.379	0.652	0
Jakmip1	0	0.427444	0.97	0.895	0
Gm2516	0	0.401433	0.544	0.267	0
Gulp1	0	0.384419	0.501	0.254	0
Ablim1	0	-0.574674	0.73	0.85	0
Cdh12	0	-1.36853	0.245	0.529	0
En1	0	-0.631671	0.047	0.344	0
A830082K12Rik	0	-0.657295	0.135	0.444	0
Trim2	0	0.395196	0.969	0.917	0
Klf12	0	0.558946	0.937	0.827	0
B3galt1	0	-1.12397	0.939	0.953	0
Hydin	0	0.291971	0.296	0.107	0
Zeb2	0	-1.40984	0.053	0.342	0
Tox3	0	-0.799735	0.323	0.599	0
Kcnh1	0	0.400082	0.677	0.382	0
Cyth1	0	-0.5331	0.423	0.704	0
Msh3	0	-0.545411	0.288	0.604	0
Gabrb3	0	0.352551	0.994	0.951	0
Ttc8	0	0.457306	0.875	0.757	0
Gm5577	0	0.451633	0.727	0.535	0
Slc39a12	0	0.364106	0.459	0.224	0
Ttll7	0	-0.536035	0.556	0.776	0
Hs3st5	0	-0.999206	0.296	0.605	0
Gas2	0	0.464109	0.719	0.511	0
Dnah7a	0	0.471762	0.622	0.378	0
Spata1	0	0.420377	0.569	0.328	0
Vwc2l	0	-1.35701	0.404	0.62	0
Zcchc12	0	0.413972	0.676	0.429	0
Spon1	0	-0.79903	0.157	0.453	0
Ptpro	0	0.422482	0.823	0.6	0
Ebf1	0	-1.32703	0.047	0.333	0
Gda	0	0.293598	0.618	0.306	0
Qk	0	-1.00359	0.478	0.713	0
Pbx1	0	-1.37243	0.988	0.962	0
Fstl4	0	-1.00233	0.115	0.405	0
Trpc5	0	0.568828	0.707	0.44	0
Ptprg	0	-0.734972	0.9	0.906	0
Rtl4	0	0.558336	0.832	0.553	0
Gnal	0	0.486917	0.856	0.696	0
Iqgap2	0	0.411325	0.738	0.465	0
Fgf1	0	-0.471461	0.139	0.447	0
Ntsr1	0	-0.480636	0.028	0.304	0
Etv1	0	-0.740248	0.071	0.356	0
Fxyd6	0	0.32455	0.548	0.294	0
Mical3	0	0.395456	0.958	0.899	0
Sh3d19	0	-0.818802	0.392	0.668	0
Scarb1	0	0.392773	0.587	0.361	0
Arhgap26	0	-0.631682	0.898	0.921	0
Epb41l3	0	0.371946	0.929	0.696	0
Ntm	0	-1.27659	0.891	0.855	0
Galnt16	0	0.422139	0.751	0.53	0
Enox1	0	0.345073	0.97	0.81	0
Cfap44	0	0.372946	0.484	0.259	0
Ppfia2	0	0.416671	0.99	0.95	0
Pgap1	0	0.437039	0.809	0.648	0
Tox	0	-0.906186	0.203	0.499	0
Tnrc6c	0	0.373054	0.985	0.935	0
Pfkfb4	0	0.406364	0.63	0.416	0
Gpm6b	0	-0.937844	0.519	0.71	0
Cck	0	-0.669151	0.207	0.506	0
Pdzrn3	0	-0.897837	0.033	0.302	0
Ppfibp1	0	0.307631	0.55	0.306	0
Pcsk1	0	0.621626	0.57	0.341	0
Ptpru	0	-0.717095	0.291	0.545	0
Nrg3os	0	0.470365	0.977	0.872	0
Epha6	0	-0.808744	0.858	0.887	0
Neto1	0	-1.00859	0.144	0.414	0
Gm44644	0	0.379621	0.588	0.36	0
St8sia5	0	-0.37117	0.053	0.328	0
Nrxn1	0	0.250017	0.999	0.986	0
Mgat5b	0	-0.438289	0.167	0.464	0
Kif26b	0	0.407168	0.899	0.672	0
Aifm3	0	0.379376	0.658	0.418	0
Rxrg	0	0.279338	0.32	0.131	0
Arhgap21	0	-0.483054	0.769	0.868	0
Grin2a	0	-0.980589	0.93	0.858	0
Rgs22	0	0.263168	0.289	0.112	0
Slc17a7	0	-0.672672	0.079	0.346	0
Klhdc10	0	0.389015	0.945	0.881	0
Syt5	0	0.370363	0.578	0.356	0
Togaram2	0	0.272444	0.361	0.158	0
Ppp3ca	0	0.302705	0.996	0.966	0
Zkscan16	0	0.393242	0.69	0.477	0
Chrnb3	0	-0.700128	0.057	0.319	0
Tspan5	0	-0.736519	0.564	0.749	0
Mitf	0	-0.504978	0.216	0.508	0
Gm43507	0	0.255157	0.304	0.121	0
Skap2	0	-0.340461	0.041	0.308	0
Sned1	0	0.286264	0.361	0.161	0
Sh3bgrl2	0	-0.335117	0.036	0.297	0
Sv2b	0	-0.902592	0.419	0.614	0
Klhl32	0	-0.605911	0.607	0.763	0
Tnik	0	0.363428	0.978	0.85	0
Epha10	0	-0.610121	0.498	0.689	0
March11	0	-0.584503	0.317	0.579	0
Gab2	0	-0.692683	0.678	0.819	0
Prex1	0	0.270917	0.393	0.183	0
Fhl1	0	0.396207	0.746	0.578	0
Gm45341	0	0.369034	0.452	0.222	0
Gm13944	0	-0.432953	0.057	0.321	0
Chd7	0	-0.452356	0.047	0.305	0
Mkx	0	-0.597395	0.094	0.361	0
Lin7a	0	-0.599997	0.478	0.709	0
Foxn3	0	0.367671	0.93	0.851	0
Nol4l	0	0.413357	0.819	0.684	0
Cpq	0	-0.912976	0.326	0.565	0
Lingo2	0	0.394267	0.997	0.922	0
Dmd	0	-0.591833	0.976	0.953	0
Ckb	0	-0.634407	0.654	0.83	0
Gm3764	0	-0.522398	0.041	0.293	0
Ogt	0	-0.413747	0.875	0.919	0
Rnd3	0	0.271827	0.299	0.122	0
Ly6h	0	0.40462	0.967	0.863	0
Slc35f1	0	-0.989861	0.801	0.845	0
AC129186.1	0	-1.2074	0.018	0.256	0
Ube2e2	0	-0.451471	0.954	0.953	0
Frmpd1	0	-0.445342	0.096	0.358	0
Stxbp5l	0	0.370547	0.97	0.861	0
Golim4	0	-0.373659	0.032	0.279	0
Adcy8	0	0.346047	0.811	0.524	0
Gpr158	0	-0.811651	0.976	0.948	0
Bche	0	0.260084	0.237	0.086	0
Ndrg4	0	-0.53057	0.826	0.892	0
AC159282.1	0	-0.424425	0.07	0.325	0
Tmem130	0	0.353212	0.853	0.722	0
Anks1b	0	-0.42571	0.999	0.977	0
Gas7	0	0.272499	0.718	0.442	0
Cds1	0	-0.334002	0.121	0.393	0
Bbs9	0	0.379158	0.852	0.713	0
Calb2	0	0.285087	0.494	0.265	0
Hmgn3	0	-0.454354	0.467	0.715	0
Osbpl3	0	-0.589955	0.182	0.433	0
Mpped2	0	-0.734843	0.656	0.771	0
Xist	0	0.324057	0.985	0.947	0
Cpe	0	-0.554412	0.85	0.899	0
Dpy19l1	0	0.326756	0.536	0.322	0
Fto	0	0.32357	0.951	0.894	0
Gm44593	0	0.357055	0.357	0.164	0
Gm30382	0	0.461955	0.708	0.464	0
Tmem178	0	-0.437271	0.071	0.319	0
Dnah7b	0	0.389904	0.519	0.314	0
Nr2f1	0	-0.336572	0.042	0.281	0
Drp2	0	-0.418709	0.276	0.54	0
Zfp618	0	0.493405	0.802	0.657	0
Macf1	0	0.256363	0.996	0.969	0
Trpc6	0	-0.938628	0.302	0.522	0
Caln1	0	-0.848632	0.785	0.784	0
Clgn	0	-0.446773	0.195	0.46	0
Rasgef1a	0	0.341247	0.858	0.712	0
Kitl	0	-0.585284	0.03	0.256	0
Camta1	0	0.287029	0.986	0.933	0
Nbea	0	0.266458	0.995	0.97	0
6430573F11Rik	0	0.286718	0.362	0.178	0
Ptpn4	0	-0.654095	0.703	0.833	0
Rgs7bp	0	-0.640812	0.722	0.818	0
4921518K17Rik	0	0.26486	0.377	0.181	0
Calm1	0	-0.607499	0.834	0.907	0
Gpr63	0	-0.320572	0.078	0.322	0
Nr2f2	0	-0.407494	0.064	0.301	0
Csgalnact1	0	-0.631694	0.134	0.372	0
Bsn	0	-0.469006	0.688	0.8	0
Ndst3	0	0.626447	0.74	0.579	0
AC154606.1	0	0.269142	0.373	0.19	0
Eps15	0	-0.419443	0.365	0.616	0
Lsamp	0	0.263127	1	0.99	0
Grb10	0	0.29396	0.955	0.79	0
Thbs3	0	0.260862	0.332	0.155	0
Unc5d	0	-1.2969	0.446	0.638	0
Nsun7	0	0.363073	0.651	0.467	0
Ubash3b	0	-0.518605	0.245	0.502	0
Tiam1	0	0.320308	0.881	0.755	0
Prmt8	0	-0.404679	0.108	0.351	0
C78859	0	-0.401275	0.494	0.704	0
Sfxn5	0	-0.446776	0.384	0.625	0
Plxna2	0	-0.496006	0.584	0.749	0
Wscd2	0	0.367041	0.698	0.516	0
Palld	0	0.44037	0.302	0.138	0
Penk	0	0.394904	0.186	0.061	0
Megf9	0	-0.464457	0.497	0.708	0
Mir9-3hg	0	-0.475054	0.166	0.411	0
Grip2	0	-0.710635	0.301	0.505	0
Serpini1	0	-0.553313	0.337	0.578	0
Scube1	0	-0.32475	0.036	0.258	0
Macrod2	0	-0.37167	0.994	0.974	0
N4bp2	0	0.300407	0.587	0.378	0
Phf24	0	-0.460911	0.55	0.724	0
Kank4	0	-0.315833	0.032	0.247	0
Pfkp	0	-0.417824	0.614	0.781	0
Ulk4	0	0.381961	0.66	0.49	0
Phldb2	0	-0.532094	0.064	0.285	0
Nell2	0	-0.73838	0.762	0.809	0
Ftx	0	0.324816	0.958	0.899	0
Eml5	0	0.31611	0.945	0.884	0
Pdzd4	0	0.350173	0.902	0.822	0
Efna5	0	-0.886299	0.526	0.708	0
Odf2	0	0.36755	0.866	0.776	0
Gm14582	0	0.358802	0.246	0.103	0
Srsf10	0	0.346812	0.833	0.731	0
Cdc42bpa	0	0.280669	0.983	0.934	0
Trpc4	0	0.350303	0.647	0.416	0
Iqsec3	0	-0.461622	0.429	0.652	0
Gm26936	0	-0.400781	0.167	0.408	0
Chrna6	0	-0.484465	0.07	0.287	0
Resp18	0	0.373859	0.771	0.616	0
Cnpy1	0	-0.409624	0.089	0.313	0
Raver2	0	-0.463922	0.223	0.463	0
Tnr	0	-0.971044	0.72	0.785	0
Kcns3	0	-0.55838	0.059	0.272	0
Galnt14	0	-0.554329	0.063	0.28	0
Iqsec2	0	0.347946	0.803	0.655	0
Tcte2	0	0.378564	0.853	0.72	0
Pcgf5	0	0.378053	0.681	0.508	0
4930578G10Rik	0	-0.483654	0.378	0.606	0
Cask	0	0.370728	0.919	0.865	0
Mapk4	0	0.303094	0.563	0.346	0
Lmo4	0	-0.498388	0.302	0.535	0
Slc16a11	0	0.315838	0.528	0.332	0
3632451O06Rik	0	-0.3585	0.178	0.425	0
9330182L06Rik	0	-0.416849	0.458	0.678	0
Cyth3	0	-0.371195	0.317	0.563	0
Sipa1l1	0	0.350717	0.935	0.824	0
Lypd1	0	-0.459378	0.087	0.309	0
Slc10a4	0	-0.335693	0.044	0.252	0
Dgkk	0	0.253523	0.289	0.125	0
Fbxo10	0	0.346246	0.713	0.559	0
Rbm39	0	0.253747	0.992	0.965	0
Ccdc148	0	0.374664	0.85	0.727	0
Fgf12	0	-0.4132	0.995	0.967	0
Mtss1	0	0.327952	0.853	0.72	0
Ano10	0	-0.33188	0.201	0.45	0
Epha3	0	-0.610866	0.301	0.528	0
St6gal2	0	-0.42759	0.314	0.542	0
Nfix	0	-0.380591	0.063	0.277	0
Tmem91	0	0.33329	0.668	0.484	0
Snx7	0	0.407824	0.491	0.318	0
Hdac7	0	0.341148	0.68	0.526	0
Kcnj3	0	0.36368	0.926	0.706	0
Kcnma1	0	-0.407728	0.994	0.964	0
Meis2	0	-1.17958	0.048	0.249	0
Rabgap1l	0	0.280352	0.988	0.947	0
Grk3	0	-0.434349	0.455	0.655	0
A330008L17Rik	0	-1.02255	0.378	0.552	0
Rsrp1	0	-0.353922	0.91	0.927	0
Col11a1	0	-0.707531	0.081	0.294	0
Sncb	0	-0.446744	0.47	0.691	0
Neo1	0	-0.459412	0.707	0.826	0
Magi2	0	-0.371876	0.998	0.981	0
Gm20696	0	0.380254	0.8	0.693	0
Dpf3	0	-0.376983	0.031	0.229	0
Fam135b	0	-0.534743	0.892	0.879	0
Gkap1	0	0.349119	0.804	0.691	0
Slc7a14	0	0.291002	0.755	0.525	0
Atp2b1	0	-0.817181	0.754	0.827	0
Gaa	0	0.321861	0.757	0.61	0
Tank	0	0.435554	0.636	0.498	0
Cdk17	0	-0.406882	0.582	0.762	0
Katnal2	0	0.322847	0.535	0.354	0
Igf1	0	-0.454157	0.053	0.254	0
Zcchc11	0	0.293726	0.926	0.874	0
Syn3	0	0.299195	0.916	0.803	0
Fam124a	0	0.323854	0.511	0.34	0
Ankrd45	0	0.340847	0.632	0.475	0
Gm9866	0	-0.315756	0.245	0.492	0
Adcy2	0	-0.758049	0.408	0.593	0
Dlg1	0	0.290135	0.923	0.807	0
Ncald	0	0.29273	0.936	0.817	0
Slc8a3	0	0.356115	0.886	0.751	0
Cadm2	0	-0.6224	0.996	0.982	0
Atp8a2	0	-0.42393	0.847	0.891	0
Osbpl1a	0	-0.397285	0.493	0.698	0
Gpatch8	0	-0.322412	0.957	0.949	0
Ccnd2	0	-0.347074	0.046	0.244	0
Gm15577	0	0.273638	0.42	0.242	0
Ntng2	0	-0.315021	0.035	0.23	0
Pparg	0	-0.272259	0.016	0.201	0
Ldhb	0	-0.506588	0.492	0.692	0
Aldoa	0	-0.542255	0.666	0.815	0
4930570G19Rik	0	0.301344	0.502	0.331	0
Mboat1	0	-0.34051	0.023	0.209	0
Acadsb	0	0.310726	0.844	0.755	0
D430041D05Rik	0	0.301109	0.93	0.811	0
Lama3	0	-0.285734	0.041	0.234	0
Gm44643	0	0.29318	0.509	0.328	0
Adgrv1	0	-0.481801	0.075	0.277	0
Slc25a4	0	-0.492889	0.614	0.778	0
Enpp2	0	-0.545212	0.156	0.383	0
Arnt2	0	0.288175	0.814	0.67	0
Gng7	0	0.250538	0.396	0.225	0
Tmem132d	0	0.322857	0.646	0.415	0
Stard9	0	-0.387992	0.291	0.522	0
Ankrd33b	0	-0.339924	0.018	0.198	0
Arhgef9	0	-0.379608	0.72	0.829	0
Bcan	0	-0.351933	0.02	0.201	0
Hsp90ab1	0	-0.500145	0.708	0.84	0
Gpr176	0	0.331213	0.557	0.382	0
Dnah9	0	0.310736	0.596	0.403	0
Usp11	0	0.300558	0.656	0.499	0
Rit2	0	0.292051	0.979	0.917	0
Pou3f2	0	-0.345968	0.059	0.254	0
Mtus2	0	0.354994	0.83	0.705	0
Akap13	0	-0.466535	0.379	0.593	0
Nrcam	0	-0.461642	0.939	0.922	0
Nxn	0	-0.415757	0.12	0.331	0
Slitrk5	0	0.310362	0.576	0.423	0
Alk	0	-0.833803	0.249	0.456	0
Nefm	0	-0.402814	0.132	0.344	0
Htr7	0	0.287933	0.448	0.26	0
Sncaip	0	-0.679595	0.405	0.562	0
Myo16	0	-0.626229	0.334	0.522	0
Camk1d	0	-0.540881	0.933	0.948	0
Ptprs	0	-0.335522	0.915	0.927	0
Stx3	0	0.332779	0.721	0.612	0
Ntf3	0	-0.385141	0.039	0.223	0
Acss2	0	-0.3519	0.409	0.625	0
Wdr78	0	0.315426	0.635	0.492	0
Camk2g	0	0.292428	0.773	0.647	0
Arl15	0	0.425753	0.925	0.865	0
Sytl5	0	0.278976	0.339	0.176	0
Ehbp1	0	-0.522401	0.909	0.925	0
Plch2	0	-0.251085	0.043	0.233	0
Ext1	0	-0.665752	0.818	0.871	0
Rnf25	0	0.311355	0.776	0.672	0
Gng4	0	0.277555	0.485	0.305	0
Chn2	0	-0.488984	0.125	0.331	0
Sorcs2	0	0.263738	0.723	0.53	0
Onecut2	0	-0.26309	0.012	0.183	0
9530026P05Rik	0	-0.643873	0.135	0.352	0
Ccdc82	0	0.287367	0.58	0.412	0
Ubb	0	-0.563699	0.87	0.927	0
Tcf12	0	-0.514662	0.777	0.872	0
Ablim3	0	0.293668	0.767	0.591	0
Slco2a1	0	-0.356788	0.117	0.321	0
Cachd1	0	-0.440712	0.355	0.565	0
Luzp2	0	0.535955	0.856	0.757	0
Tox2	0	0.302686	0.726	0.546	0
Zfp697	0	-0.460921	0.403	0.608	0
Napepld	0	-0.304339	0.131	0.345	0
Fgfr1	0	0.273898	0.564	0.386	0
Abr	0	0.286173	0.949	0.892	0
Ppp1r16b	0	-0.366212	0.222	0.453	0
Pde3b	0	0.309389	0.738	0.624	0
Ppp2r2b	0	0.250031	0.996	0.954	0
Tusc3	0	0.307417	0.843	0.754	0
Ksr1	0	-0.319565	0.194	0.414	0
Coq8b	0	0.291564	0.495	0.336	0
Gad2	0	-0.778122	0.1	0.291	0
Carmil1	0	0.310188	0.812	0.693	0
Mctp2	0	-0.347845	0.069	0.259	0
Agtpbp1	0	-0.348153	0.657	0.79	0
Ncam1	0	-0.402304	0.98	0.963	0
Rassf3	0	-0.305677	0.046	0.228	0
Mpp7	0	-0.405752	0.285	0.491	0
Mok	0	0.305462	0.573	0.421	0
Rab36	0	0.295517	0.536	0.384	0
Gm16054	0	0.318584	0.454	0.297	0
Gm16183	0	-0.307262	0.331	0.557	0
Dock3	0	-0.296703	0.973	0.95	0
Pdzd2	0	-0.455003	0.194	0.406	0
Prima1	0	-0.346824	0.067	0.252	0
Mov10	0	0.255516	0.381	0.225	0
Oprm1	0	0.273624	0.572	0.387	0
Zcchc18	0	0.281748	0.942	0.888	0
Creb3l2	0	-0.2598	0.158	0.374	0
Fam19a1	0	-0.57117	0.931	0.61	0
Podxl2	0	0.272886	0.76	0.62	0
1700025G04Rik	0	0.290938	0.846	0.751	0
Fgf14	0	-0.285341	0.997	0.978	0
Lrba	0	-0.355523	0.793	0.868	0
Cdh18	0	-0.511104	0.849	0.904	0
Arhgap44	0	-0.354166	0.777	0.85	0
Socs2	0	-0.321948	0.264	0.49	0
Shisa7	0	0.281877	0.564	0.409	0
Osbp2	0	-0.359341	0.339	0.549	0
Celf6	0	0.277852	0.6	0.441	0
Gm20642	0	0.318109	0.964	0.86	0
Gm15584	0	0.276691	0.326	0.174	0
Gm45645	0	-0.339993	0.204	0.41	0
Osbpl8	0	-0.383735	0.634	0.775	0
Slc2a13	0	0.303764	0.919	0.811	0
Abcb7	0	0.349649	0.634	0.508	0
Zbtb16	0	-0.362356	0.135	0.336	0
Cast	0	-0.281471	0.112	0.307	0
Hsd17b12	0	-0.281188	0.293	0.527	0
Aff2	0	0.31643	0.856	0.724	0
Tspan9	0	-0.273407	0.042	0.216	0
Pou6f2	0	0.28428	0.487	0.307	0
Tro	0	0.290687	0.768	0.67	0
Araf	0	0.29781	0.813	0.731	0
Sgsm1	0	0.299097	0.793	0.692	0
Slc43a2	0	-0.315248	0.379	0.6	0
Atrnl1	0	-0.59842	0.845	0.85	0
Zmat1	0	0.306782	0.621	0.49	0
2900055J20Rik	0	-0.444831	0.148	0.338	0
Plcxd2	0	-0.331145	0.173	0.372	0
Kcnk2	0	0.273624	0.691	0.519	0
Slc4a3	0	-0.311096	0.418	0.63	0
Nrsn2	0	0.254483	0.566	0.404	0
Klhl7	0	0.291332	0.844	0.774	0
Map3k14	0	0.260551	0.371	0.219	0
Synj2	0	-0.260987	0.101	0.294	0
Eno1	0	-0.304826	0.311	0.542	0
A830036E02Rik	0	-0.293992	0.012	0.165	0
Tagln3	0	-0.341354	0.321	0.543	0
Gm2163	0	-0.397852	0.591	0.737	0
Tmem132b	0	-0.436984	0.808	0.825	0
Rab27a	0	0.30817	0.56	0.412	0
Asap1	0	-0.502129	0.754	0.814	0
Gm26804	0	-0.317299	0.955	0.949	0
Epha7	0	-0.545703	0.422	0.591	0
Zfp711	0	0.300709	0.398	0.25	0
Nrxn2	0	0.252306	0.917	0.858	0
Pde11a	0	-0.593056	0.09	0.267	0
Atp1a1	0	0.279046	0.614	0.46	0
Shisa4	0	-0.274707	0.189	0.402	0
Gng2	0	0.272533	0.839	0.751	0
Tmx4	0	0.271011	0.86	0.788	0
Mest	0	0.290095	0.522	0.366	0
Palmd	0	-0.377638	0.209	0.402	0
Tceal3	0	0.296501	0.538	0.396	0
Dennd2a	0	0.27034	0.601	0.439	0
Camkv	0	0.251209	0.716	0.536	0
Cplx2	0	-0.358791	0.32	0.522	0
Olfm1	0	-0.527599	0.437	0.597	0
Nalcn	0	0.252379	0.969	0.921	0
Ddah1	0	-0.461475	0.412	0.604	0
Srrm1	0	0.273898	0.875	0.829	0
Pkm	0	-0.415481	0.591	0.755	0
Chgb	0	0.40826	0.6	0.472	0
Meis1	0	-0.304757	0.013	0.161	0
Stk19	0	0.287201	0.603	0.477	0
Zfp521	0	-0.53865	0.218	0.4	0
Cfap54	0	0.305252	0.558	0.409	0
Crhr1	0	-0.25473	0.124	0.313	0
Arhgap15	0	-0.307884	0.058	0.224	0
Mdh1	0	-0.44822	0.73	0.837	0
Sh3rf3	0	0.288033	0.826	0.677	0
Hspa8	0	-0.48964	0.673	0.806	0
Fat4	0	-0.288967	0.173	0.368	0
Sh3gl2	0	-0.485953	0.829	0.853	0
Bmpr1b	0	-0.374652	0.053	0.219	0
Mpp5	0	0.281412	0.618	0.478	0
Gabbr2	0	-0.451535	0.891	0.888	0
Samd4	0	0.27567	0.828	0.663	0
Fign	0	-0.567753	0.062	0.225	0
Slc22a23	0	0.311938	0.786	0.688	0
Wls	0	-0.350074	0.104	0.282	0
Mindy2	0	-0.305919	0.422	0.624	0
Celf5	0	0.262839	0.773	0.653	0
Ptpn5	0	-0.483935	0.685	0.785	0
March4	0	-0.637636	0.555	0.68	0
Ndnf	0	-0.404741	0.021	0.167	0
Cyld	0	0.269159	0.835	0.761	0
Spag6l	0	0.264391	0.572	0.436	0
Rps6ka3	0	-0.415247	0.658	0.778	0
Diaph2	0	-0.462837	0.74	0.817	0
Arhgef3	0	-0.274592	0.218	0.427	0
Tpi1	0	-0.353786	0.361	0.575	0
Ccdc34	0	0.303694	0.583	0.45	0
Ube2g1	0	-0.325729	0.606	0.761	0
Gm27032	0	-0.266531	0.291	0.501	0
Actb	0	-0.523446	0.76	0.864	0
Copg2	0	0.278196	0.849	0.773	0
Sybu	0	0.254991	0.957	0.908	0
Rab6b	0	-0.324547	0.758	0.846	0
Slc25a23	0	0.287489	0.768	0.68	0
Sema5b	0	-0.464968	0.057	0.216	0
Celf3	0	0.270785	0.869	0.769	0
Spata7	0	0.279376	0.801	0.722	0
Eif2ak3	0	-0.259248	0.223	0.432	0
Arhgap42	0	-0.26835	0.223	0.427	0
Plekha6	0	0.280937	0.867	0.784	0
Kcna1	0	-0.378824	0.185	0.365	0
Npas3	0	-1.26296	0.54	0.65	0
Gria4	0	0.254402	0.995	0.959	0
Gm10754	0	-0.422709	0.084	0.249	0
Plxna4	0	-0.417062	0.928	0.885	0
Skap1	0	0.268482	0.29	0.157	0
Ppp3cc	0	-0.280298	0.397	0.604	0
Colgalt2	0	-0.360749	0.159	0.339	0
Satb2	0	-0.482842	0.024	0.167	0
Stmn2	0	-0.388937	0.835	0.891	0
Unc13a	0	-0.293174	0.564	0.723	0
Gm12394	0	-0.300468	0.34	0.534	0
Got1	0	-0.313271	0.326	0.532	0
Ror1	0	-0.306593	0.055	0.211	0
Trpc3	0	-0.336148	0.036	0.183	0
Neurl1a	0	0.262532	0.624	0.493	0
Tbc1d19	0	0.268036	0.747	0.67	0
Prepl	0	0.255727	0.765	0.686	0
Nrip3	0	-0.303472	0.262	0.458	0
Tiam2	0	-0.30965	0.13	0.308	0
Eda	0	0.274209	0.632	0.46	0
Adra1b	0	-0.275829	0.097	0.268	0
Cacnb4	0	-0.49504	0.878	0.887	0
1110051M20Rik	0	0.255018	0.94	0.886	0
Spag5	0	-0.521712	0.639	0.752	0
Sergef	0	0.274975	0.808	0.719	0
Eps8	0	-0.34163	0.2	0.385	0
Plekhg1	0	-0.96711	0.041	0.186	0
Ogfrl1	0	-0.283394	0.264	0.465	0
Unc13b	0	-0.397431	0.549	0.687	0
Pcsk5	0	-0.533524	0.141	0.311	0
Dnm2	0	-0.289703	0.525	0.701	0
Dock4	0	-0.609298	0.905	0.888	0
Cdh10	0	-0.474921	0.726	0.816	0
Rasgrf1	0	-0.587157	0.56	0.648	0
Phf14	0	0.263024	0.923	0.872	0
Kif3a	0	0.255114	0.768	0.692	0
Gbf1	0	-0.424965	0.863	0.893	0
Chrna7	0	0.367103	0.595	0.457	0
Map1lc3a	0	-0.305053	0.31	0.521	0
Nefl	0	-0.343289	0.246	0.439	0
Snph	0	-0.342903	0.677	0.784	0
Kcnk9	0	-0.274984	0.169	0.35	0
Mir124-2hg	0	-0.36683	0.539	0.673	0
Fam155a	0	-0.315767	1	0.978	0
Gm28153	0	-0.38246	0.293	0.487	0
Wasf1	0	-0.399215	0.486	0.638	0
Slc25a5	0	-0.269229	0.19	0.38	0
Radil	0	0.262245	0.571	0.449	0
Tbl1xr1	0	-0.292915	0.382	0.572	0
Nkain3	0	-0.881256	0.671	0.734	0
Map4k4	0	-0.316196	0.535	0.708	0
Apex2	0	0.265463	0.849	0.77	0
Gtdc1	0	-0.415525	0.618	0.736	0
AC124490.1	0	-0.258195	0.03	0.167	0
Ralgapa2	0	-0.334214	0.808	0.869	0
Gm48749	0	0.265274	0.495	0.347	0
Cald1	0	-0.361717	0.119	0.282	0
Trim9	0	-0.390811	0.881	0.886	0
Adcy9	0	-0.378993	0.666	0.774	0
Gramd1b	0	-0.32796	0.743	0.82	0
Airn	0	-0.374657	0.275	0.466	0
Gm47271	0	-0.253128	0.269	0.467	0
Ppia	0	-0.41967	0.663	0.788	0
Alcam	0	0.38155	0.829	0.687	0
Gm48742	0	-0.363958	0.306	0.484	0
Slc6a15	0	-0.262613	0.353	0.545	0
Evi5	0	-0.302524	0.663	0.772	0
Prkar2b	0	0.318972	0.638	0.531	0
Gad1	0	-0.506065	0.099	0.252	0
Lypd6b	0	-0.267993	0.018	0.144	0
Pgam1	0	-0.337208	0.383	0.576	0
Cntln	0	-0.308783	0.568	0.728	0
Fam120b	0	0.253844	0.79	0.724	0
Tll1	0	-0.661169	0.217	0.381	0
Frmd4b	0	-0.850244	0.573	0.645	0
Vgf	0	-0.273237	0.14	0.318	0
Grin2b	0	-0.418656	0.993	0.955	0
Spock1	0	-0.852755	0.679	0.696	0
Slc32a1	0	-0.278383	0.037	0.171	0
Cyfip2	0	-0.291892	0.757	0.837	0
Tlk1	0	-0.317577	0.577	0.723	0
Myo6	0	-0.330809	0.526	0.675	0
Dlgap3	0	-0.288032	0.504	0.664	0
Cox5a	0	-0.370698	0.491	0.665	0
E130307A14Rik	0	0.252657	0.833	0.77	0
Pcp4	0	-0.473818	0.293	0.477	0
Abca8b	0	0.256137	0.662	0.538	0
Ryr3	0	-0.611667	0.9	0.843	0
Serpine2	0	-0.541615	0.278	0.426	0
6530403H02Rik	0	-1.05363	0.138	0.283	0
Xylt1	0	-0.606823	0.606	0.701	0
Garnl3	0	-0.432778	0.777	0.796	0
Tpm1	0	-0.251575	0.364	0.558	0
Rassf8	0	0.267404	0.699	0.595	0
Arntl	0	-0.27558	0.344	0.524	0
Cox7b	0	-0.32837	0.474	0.652	0
Rufy1	0	0.277056	0.63	0.526	0
Gpcpd1	0	-0.308387	0.594	0.743	0
Palm	0	0.253349	0.681	0.586	0
Rab3a	0	-0.318743	0.404	0.587	0
Palm2	0	-0.360772	0.628	0.747	0
Ptn	0	-0.521463	0.262	0.424	0
Aldh1a1	0	-0.736708	0.095	0.237	0
Plppr3	0	0.251704	0.56	0.445	0
Cabp1	0	-0.290536	0.23	0.397	0
Efr3a	0	-0.390064	0.52	0.664	0
Rbms1	0	0.350752	0.686	0.575	0
Fth1	0	-0.508766	0.724	0.825	0
Syndig1	0	-0.376821	0.198	0.358	0
Atp5g1	0	-0.345665	0.434	0.621	0
Pcdh9	0	-0.784831	0.981	0.959	0
Atp5b	0	-0.330088	0.539	0.698	0
Col19a1	0	-0.322126	0.047	0.178	0
Gm11418	0	-0.259504	0.124	0.28	0
Slc44a5	0	-0.629622	0.469	0.597	0
Mad1l1	0	-0.461009	0.729	0.816	0
Atp5g3	0	-0.346744	0.418	0.599	0
Lgr5	0	-0.281674	0.014	0.128	0
Flnb	0	-0.288351	0.656	0.774	0
Ankrd42	0	0.259481	0.624	0.533	0
Nup93	0	-0.272681	0.565	0.695	0
Htr1f	0	-0.620646	0.387	0.529	0
Trhde	0	-0.502141	0.183	0.338	0
Kctd17	0	-0.25994	0.296	0.477	0
Ankrd24	0	-0.298471	0.462	0.617	0
Calm3	0	-0.296042	0.42	0.602	0
Reep1	0	-0.303678	0.808	0.854	0
Cacna2d2	0	-0.434946	0.495	0.589	0
Plcb4	0	-0.759558	0.793	0.732	0
Prkag2	0	-0.406231	0.649	0.74	0
Gm48747	0	-0.255295	0.41	0.581	0
Chchd10	0	-0.338085	0.353	0.536	0
Fgf10	0	-0.265021	0.065	0.205	0
Rap1gds1	0	-0.352798	0.826	0.861	0
Brinp1	0	-0.510013	0.84	0.81	0
Pebp1	0	-0.319536	0.622	0.766	0
Fry	0	-0.271967	0.945	0.934	0
Luzp1	0	-0.333571	0.577	0.709	0
Ypel3	0	-0.274851	0.46	0.642	0
Mif	0	-0.28894	0.33	0.514	0
Zfyve28	0	-0.287959	0.43	0.58	0
Ndrg3	0	-0.270003	0.656	0.772	0
Ldlrad3	0	-0.276405	0.301	0.469	0
Selenow	0	-0.313349	0.514	0.677	0
Mospd2	0	0.340748	0.448	0.346	0
Fam184a	0	-0.721861	0.718	0.755	0
Rgs6	0	-1.25447	0.76	0.674	0
Zfp423	0	-0.35296	0.365	0.521	0
Rab31	0	-0.299971	0.238	0.407	0
Rspo2	0	-0.28762	0.037	0.154	0
Sntb2	0	-0.308232	0.328	0.496	0
Atp5d	0	-0.304988	0.404	0.582	0
Cblb	0	0.279165	0.645	0.555	0
Gab1	0	-0.313183	0.052	0.175	0
Sdk2	0	-0.373932	0.27	0.421	0
Tmsb4x	0	-0.366278	0.378	0.554	0
Tmeff1	0	-0.279751	0.314	0.478	0
Pde10a	0	-0.427446	0.955	0.92	0
2900097C17Rik	0	-0.305752	0.499	0.664	0
Homer2	0	-0.365659	0.472	0.594	0
Chst9	0	-0.429975	0.074	0.2	0
Camk4	0	-0.450461	0.662	0.747	0
Atp1b3	0	-0.263157	0.389	0.557	0
Arhgap31	0	-0.266297	0.031	0.144	0
Car2	0	-0.295822	0.146	0.3	0
Sgk1	0	-0.291812	0.427	0.591	0
Ttll5	0	-0.290748	0.601	0.73	0
Smarca2	0	-0.33632	0.596	0.716	0
Carmil3	0	-0.276885	0.406	0.561	0
Peak1	0	-0.351765	0.791	0.85	0
Ywhag	0	-0.281585	0.78	0.857	0
Xrcc4	0	0.259384	0.63	0.533	0
Igsf21	0	-0.265227	0.244	0.398	0
Far2	0	-0.257756	0.46	0.619	0
Slc44a1	0	-0.281744	0.657	0.77	0
Atp5a1	0	-0.287133	0.552	0.703	0
Ptpn3	0	-0.544032	0.264	0.411	0
Lingo1	0	-0.294198	0.576	0.687	0
Ank1	0	-0.366715	0.631	0.7	0
Hecw2	0	-0.307048	0.927	0.905	0
Tubb4a	0	-0.299446	0.379	0.557	0
Atp5j	0	-0.289007	0.359	0.532	0
Igsf9b	0	-0.30576	0.5	0.63	0
Kcnq3	0	-0.428501	0.961	0.916	0
Vcan	0	-0.338815	0.045	0.157	0
Phactr3	0	-0.293481	0.707	0.792	0
Chst11	0	-0.34693	0.427	0.579	0
Uchl1	0	-0.316754	0.782	0.857	0
Calm2	0	-0.356783	0.883	0.901	0
Ptprr	0	-0.347073	0.656	0.757	0
Fbxw7	0	-0.264848	0.602	0.723	0
Pcsk6	0	-0.263918	0.062	0.178	0
Pde1c	0	-0.435207	0.17	0.309	0
Sorl1	0	-0.271985	0.467	0.612	0
Ppm1l	0	-0.270265	0.685	0.792	0
Tmem117	0	-0.445752	0.791	0.81	0
C130071C03Rik	0	-0.374024	0.707	0.741	0
Cmss1	0	-0.355426	0.805	0.877	0
Rasgrf2	0	-0.377373	0.647	0.714	0
4930419G24Rik	0	-0.51323	0.428	0.54	0
Agk	0	-0.393899	0.543	0.663	0
Cfl1	0	-0.269283	0.417	0.584	0
Slc25a3	0	-0.299691	0.687	0.784	0
Cux2	0	-0.356092	0.573	0.638	0
Vamp2	0	-0.270092	0.51	0.669	0
Ank	0	-0.272766	0.67	0.769	0
Mdga2	0	-0.333476	0.995	0.972	0
Asph	0	-0.251891	0.513	0.66	0
Tcp11l1	0	-0.263763	0.582	0.701	0
Raph1	0	-0.265532	0.787	0.839	0
Zmiz1	0	-0.290616	0.48	0.612	0
Asic2	0	-1.03512	0.879	0.838	0
Gm37459	0	-0.283952	0.256	0.397	0
Esyt2	0	-0.271279	0.811	0.852	0
Bcl2	0	-0.261966	0.302	0.458	0
Ghr	0	-0.891162	0.548	0.628	0
Klhl2	0	-0.347524	0.512	0.643	0
B230334C09Rik	0	-0.332142	0.486	0.611	0
Galnt9	0	-0.307492	0.301	0.432	0
Bin1	0	-0.267069	0.662	0.776	0
Efr3b	0	-0.292063	0.657	0.747	0
Hint1	0	-0.2951	0.469	0.626	0
Dgkz	0	-0.260579	0.501	0.624	0
Tcf7l2	0	-0.785362	0.068	0.174	0
Cox8a	0	-0.362236	0.637	0.764	0
Fkbp1a	0	-0.26646	0.533	0.674	0
Stum	0	-0.283488	0.175	0.298	0
Kctd1	0	-0.265644	0.46	0.607	0
Stmn3	0	-0.306866	0.856	0.899	0
Lrfn2	0	-0.384423	0.505	0.587	0
Pcdh10	0	-0.297042	0.49	0.624	0
Nptxr	0	-0.260745	0.224	0.361	0
Man1a2	0	-0.286678	0.738	0.801	0
Cox6c	0	-0.257912	0.387	0.548	0
Mef2c	0	-0.742795	0.634	0.672	0
Tubb2a	0	-0.305412	0.596	0.729	0
Snx29	0	-0.269405	0.726	0.806	0
Klf7	0	-0.26405	0.606	0.724	0
Nlk	0	-0.311758	0.849	0.871	0
Slc6a3	0	-1.0527	0.338	0.39	0
Clstn1	0	-0.258076	0.666	0.761	0
Col8a1	0	-0.251127	0.085	0.194	0
Rnf220	0	-0.914404	0.417	0.548	0
Cox6b1	0	-0.25774	0.406	0.56	0
Atp1a3	0	-0.274342	0.876	0.897	0
Numb	0	-0.27372	0.671	0.767	0
Uqcrq	0	-0.252368	0.37	0.529	0
Ret	0	-0.600061	0.43	0.472	0
Prkcd	0	-0.47182	0.046	0.14	0
Hivep3	0	-0.276765	0.872	0.877	0
Npas2	0	-0.3724	0.286	0.406	0
Ndufa4	0	-0.319232	0.527	0.665	0
Actg1	0	-0.267174	0.446	0.597	0
Ccbe1	0	-0.274834	0.082	0.187	0
Dynll1	0	-0.292564	0.452	0.597	0
Dach1	0	-0.652251	0.168	0.276	0
Rin2	0	-0.278586	0.294	0.415	0
Megf11	0	-0.427584	0.137	0.249	0
Cobl	0	-0.268219	0.532	0.654	0
Ccdc171	0	-0.291869	0.39	0.517	0
Otud7a	0	-0.290183	0.946	0.92	0
Ptk2b	0	-0.43374	0.245	0.343	0
Zfp608	0	-0.312747	0.603	0.709	0
Sorbs2	0	-0.450082	0.958	0.925	0
Lix1	0	-0.611837	0.316	0.422	0
Dgki	0	-0.311466	0.956	0.911	0
Ccdc136	0	-0.317973	0.571	0.671	0
Elavl4	0	-0.447284	0.855	0.841	0
Slc1a2	0	-0.584472	0.639	0.698	0
Grb14	0	-0.264163	0.358	0.492	0
Itga8	0	-0.273423	0.108	0.213	0
Lrrc3b	0	-0.567207	0.586	0.633	0
Mt3	0	-0.318631	0.501	0.641	0
Ppargc1a	0	-0.289796	0.382	0.506	0
Thy1	0	-0.265053	0.384	0.514	0
L3mbtl4	0	-0.31546	0.182	0.294	0
Pex5l	0	-0.908789	0.847	0.817	0
Slc23a2	0	-0.250997	0.698	0.771	0
Hcn1	0	-0.718501	0.522	0.575	0
Hipk2	0	-0.324673	0.673	0.759	0
Gmds	0	-0.270848	0.867	0.887	0
Mical2	0	-0.352756	0.554	0.622	0
Rimbp2	0	-0.272705	0.842	0.846	0
Sox6	0	-0.266018	0.516	0.34	0
Scn8a	0	-0.254268	0.877	0.857	0
Xkr4	0	-0.254464	0.995	0.967	0
Pappa	0	-0.350253	0.149	0.249	0
Robo1	0	-0.293913	0.964	0.925	0
Srrm4	0	-0.331337	0.646	0.733	0
Ptprj	0	-0.381804	0.777	0.813	0
Khdrbs3	0	-0.668412	0.71	0.727	0
Reln	0	-0.421797	0.087	0.181	0
Lmo7	0	-0.287146	0.398	0.502	0
Gm15261	0	-0.284205	0.214	0.323	0
Camk2n1	0	-0.257406	0.512	0.627	0
Epb41	0	-0.318826	0.53	0.614	0
Lyst	0	-0.272883	0.708	0.771	0
Sorbs1	0	-0.255246	0.869	0.878	0
Nkain2	0	-0.402097	0.998	0.972	0
Kctd16	0	-1.15154	0.566	0.568	0
Shc3	0	-0.300517	0.542	0.644	0
Cacna1c	0	-0.388534	0.976	0.942	0
Acap2	0	-0.25413	0.673	0.738	0
Specc1	0	-0.251871	0.804	0.834	0
Lef1	0	-0.709816	0.034	0.103	0
Stmn1	0	-0.291774	0.651	0.745	0
Otx2os1	0	-0.320792	0.048	0.12	0
Gm42418	0	-0.365055	1	0.999	0
Tmem164	0	-0.321822	0.526	0.597	0
St6galnac5	0	-0.553164	0.715	0.666	0
Enox2	0	0.260728	0.463	0.41	0
Sorbs2os	0	-0.318185	0.686	0.732	0
Cacng3	0	-0.293836	0.51	0.582	0
Scd2	0	-0.304635	0.468	0.584	0
Kcnb2	0	-0.340391	0.963	0.91	0
Rnf150	0	-0.260478	0.704	0.746	0
Sept7	0	-0.278918	0.714	0.783	0
St18	0	-0.442575	0.152	0.089	0
Prkd1	0	-0.252616	0.215	0.313	0
Fnbp1	0	-0.270111	0.803	0.852	0
Arhgap6	0	-0.487061	0.522	0.57	0
Ttr	0	-0.463686	0.275	0.384	0
Aff3	0	-0.283685	0.879	0.855	0
Cntnap5c	0	-0.532116	0.469	0.541	0
Atp2a2	0	-0.290797	0.738	0.789	0
Atp1b1	0	-0.314109	0.912	0.921	0
Phlpp1	0	-0.338959	0.758	0.806	0
Cdh20	0	-0.417826	0.372	0.455	0
Pigk	0	-0.347746	0.769	0.766	0
Olfm3	0	-0.402011	0.554	0.586	0
Elavl2	0	-0.449411	0.917	0.857	0
Apoe	0	-0.369818	0.206	0.303	0
Sst	0	-0.258876	0.066	0.131	0
Hs3st4	0	-1.37728	0.388	0.424	0
Bach2	0	-0.313934	0.759	0.778	0
Gm28928	0	-0.765706	0.411	0.301	0
mt-Co1	0	-0.387465	0.506	0.617	0
Cdh6	0	-0.264573	0.201	0.288	0
Spock3	0	-0.289976	0.659	0.728	0
Syt2	0	-0.292245	0.171	0.247	0
Lrmda	0	-0.474664	0.362	0.419	0
Kctd8	0	-0.383753	0.207	0.286	0
Gm13629	0	-0.386642	0.476	0.522	0
Hs6st3	0	-1.17532	0.809	0.684	0
Ebf2	0	-0.398194	0.048	0.1	0
Slc4a4	0	-0.469524	0.219	0.288	0
Tacr3	0	-0.310498	0.137	0.202	0
Klhl1	0	-1.10641	0.742	0.622	0
Chsy3	0	-0.250197	0.658	0.508	0
Synpo2	0	-0.814136	0.117	0.174	0
mt-Co2	0	-0.303804	0.35	0.446	0
mt-Co3	0	-0.378191	0.477	0.572	0
Ptgds	0	-0.54057	0.226	0.309	0
Ano3	0	-0.523341	0.464	0.491	0
Sparcl1	0	-0.283782	0.316	0.391	0
Rph3a	0	-0.266535	0.5	0.54	0
Rbfox1	0	-0.619987	0.996	0.83	0
Adarb1	0	-0.37696	0.666	0.711	0
Pcsk2	0	-0.33668	0.927	0.859	0
Kcnd2	0	-0.396942	0.971	0.914	0
Shisa6	0	-0.632115	0.62	0.598	0
Tead1	0	-0.272452	0.363	0.428	0
Mbp	0	-0.258981	0.494	0.44	0
Tshz3	0	-0.309795	0.333	0.381	0
Plp1	0	-0.751192	0.241	0.313	0
mt-Atp6	0	-0.284216	0.322	0.398	0
mt-Cytb	0	-0.308952	0.379	0.458	0
Nova1	0	-0.318291	0.49	0.549	0
Cntnap4	0	-0.451377	0.784	0.732	0
Gpc5	0	-1.12207	0.444	0.493	0
Dgkg	0	-0.507091	0.505	0.5	0
Zmat4	0	-0.663553	0.551	0.556	0
Rorb	0	-0.692813	0.2	0.242	0
Gm38505	0	-0.26618	0.116	0.161	0
Sdc2	0	-0.34479	0.607	0.623	0
Lrrc7	0	-0.349245	0.993	0.953	0
1700042O10Rik	0	-0.991527	0.629	0.472	0
Galnt17	0	-0.487451	0.724	0.678	0
Nrgn	0	-0.311767	0.548	0.568	0
Ddc	0	-1.07839	0.704	0.516	0
Elmo1	0	-0.362603	0.672	0.698	0
Maml3	0	-0.348908	0.694	0.672	0
Grik3	0	-0.39387	0.691	0.61	0
Ncam2	0	-0.263682	0.909	0.886	0
Slc18a2	0	-0.475582	0.814	0.574	0
Rcan2	0	-0.29756	0.81	0.742	0
Pde7b	0	-0.424148	0.533	0.436	0
Pdzrn4	0	-0.299189	0.945	0.848	0
Ptprd	0	-0.581247	0.999	0.972	0
Cdh8	0	-0.264289	0.93	0.794	0
Cst3	0	-0.323774	0.588	0.652	0
Lmo3	0	-0.390658	0.502	0.494	0
Ryr2	0	-0.535769	0.875	0.708	1
Zbtb20	0	-0.342283	0.94	0.913	1
A830018L16Rik	0	-0.378324	0.741	0.613	1
5730522E02Rik	0	-0.415434	0.786	0.74	1
Zfhx3	0	-0.366829	0.951	0.736	1
Camk2a	0	-0.308107	0.886	0.748	1
Plcl1	0	-0.447192	0.795	0.751	1
Ptprt	0	-0.534767	0.575	0.487	1
Phactr1	0	-0.463058	0.962	0.865	1
Ntn1	0	-0.409034	0.602	0.436	1
Cit	0	-0.328375	0.891	0.848	1
Kirrel3	0	-0.537068	0.91	0.817	1
Mast4	0	-0.336582	0.887	0.849	1
Unc13c	0	-0.329881	0.494	0.439	1
Kcnj6	0	-0.561084	0.924	0.833	1
Col25a1	0	-0.900929	0.627	0.565	1
Zfp536	0	-0.393272	0.292	0.292	1
Clstn2	0	-0.315054	0.92	0.857	1
Tmcc3	0	-0.478784	0.646	0.587	1
Pde1a	0	-0.410438	0.881	0.759	1
Cacna2d3	0	-0.285803	0.968	0.866	1
Gabra4	0	-0.25745	0.607	0.582	1
Cpne4	0	-0.30335	0.913	0.791	1
Trps1	0	-0.420073	0.793	0.75	1
Zfp804b	0	-0.936172	0.514	0.463	1
Egfem1	1	-0.296077	0.68	0.612	1
Stxbp6	1	-0.295266	0.312	0.295	1
Kcnn3	1	-0.257692	0.763	0.671	1

## Sheet: c_7
Column1	p_val	avg_log2FC	pct.1	pct.2	p_val_adj
Sulf1	0	1.31571	0.721	0.22	0
Kcnb2	0	1.35487	0.984	0.91	0
Tmeff2	0	0.884529	0.973	0.89	0
Plcl1	0	1.23569	0.897	0.748	0
Erbb4	0	1.92903	0.998	0.703	0
Epha4	0	-1.17986	0.137	0.587	0
Scg2	0	0.943961	0.88	0.622	0
Pid1	0	0.843949	0.965	0.818	0
Rnf152	0	0.845607	0.703	0.359	0
Cntnap5a	0	-1.34728	0.677	0.863	0
Lmx1a	0	1.18748	0.856	0.281	0
Pld5	0	1.33641	0.801	0.398	0
Celf2	0	-1.73935	0.959	0.968	0
Gad2	0	2.09748	0.868	0.26	0
Pbx3	0	1.68933	0.995	0.687	0
C79798	0	0.846327	0.7	0.307	0
Pde11a	0	1.53923	0.596	0.246	0
Frmd5	0	0.659354	0.961	0.749	0
Snap25	0	-0.568212	0.982	0.978	0
Slc32a1	0	0.779074	0.562	0.149	0
Gria3	0	0.752874	0.991	0.881	0
Tenm1	0	0.999093	0.991	0.92	0
Htr2c	0	1.35727	0.828	0.493	0
Nlgn1	0	-0.825357	0.988	0.985	0
Pld1	0	0.630246	0.411	0.069	0
Pex5l	0	-2.32852	0.432	0.833	0
4930419G24Rik	0	-0.995006	0.125	0.549	0
Kcnab1	0	-1.49837	0.187	0.599	0
Fstl5	0	-1.53492	0.243	0.664	0
Ntng1	0	1.562	0.987	0.675	0
Ndst3	0	1.74428	0.949	0.574	0
Col25a1	0	-2.09752	0.193	0.582	0
Runx1t1	0	1.19426	0.933	0.633	0
Slc26a7	0	1.21838	0.531	0.021	0
Necab1	0	1.09564	0.806	0.489	0
Bnc2	0	0.595723	0.807	0.347	0
Grik3	0	-1.19223	0.25	0.627	0
Cacna2d1	0	-1.27966	0.685	0.876	0
Dpp6	0	1.22485	0.998	0.967	0
Cnpy1	0	0.773198	0.657	0.288	0
Nwd2	0	-1.74813	0.21	0.667	0
Gabra4	0	-0.974852	0.143	0.6	0
Rasgef1b	0	1.01429	0.952	0.843	0
Galnt17	0	-1.21735	0.349	0.693	0
Foxp2	0	1.74578	0.972	0.616	0
Met	0	0.511471	0.232	0.034	0
Grm8	0	1.2603	0.866	0.571	0
Grid2	0	0.899957	0.988	0.871	0
9530026P05Rik	0	1.00572	0.735	0.327	0
Magi1	0	0.787658	0.994	0.953	0
Cntn4	0	-1.80945	0.439	0.777	0
Itpr1	0	-0.806291	0.252	0.658	0
Grm7	0	-1.86509	0.599	0.848	0
Slco3a1	0	-0.890602	0.468	0.797	0
Sv2b	0	-1.35367	0.123	0.622	0
Ebf3	0	2.07286	0.974	0.305	0
Samd5	0	-1.0087	0.155	0.596	0
Tmtc2	0	-1.32118	0.129	0.609	0
Syt1	0	-0.926189	0.986	0.973	0
Gm2694	0	0.465035	0.429	0.151	0
Ptprg	0	1.24571	0.983	0.903	0
Cacna2d3	0	1.27526	0.994	0.866	0
Ebf2	0	2.81293	0.825	0.071	0
4930438E09Rik	0	1.03494	0.501	0.022	0
Lmo7	0	-0.759058	0.072	0.512	0
Hs6st3	0	-2.38514	0.246	0.707	0
Opcml	0	-1.46636	0.682	0.949	0
Megf11	0	1.81411	0.604	0.23	0
Clstn2	0	-2.52733	0.367	0.878	0
4921534H16Rik	0	-0.646488	0.043	0.453	0
Arpp21	0	-2.17347	0.234	0.634	0
Egfr	0	0.660438	0.253	0.024	0
Ntn1	0	0.715833	0.891	0.429	0
Car10	0	-1.78097	0.251	0.633	0
Adarb2	0	1.55068	0.977	0.676	0
Rreb1	0	-1.21929	0.214	0.603	0
Vcan	0	0.559037	0.412	0.142	0
Crhbp	0	0.653148	0.393	0.031	0
Fgf10	0	0.946335	0.552	0.185	0
Nova1	0	0.94434	0.827	0.536	0
Nrxn3	0	1.10551	0.997	0.966	0
Csmd3	0	-0.97057	0.925	0.965	0
Sntb1	0	1.0145	0.548	0.242	0
Asap1	0	0.811715	0.918	0.807	0
Kcnk9	0	0.669741	0.627	0.331	0
Pdzrn4	0	-1.14628	0.638	0.861	0
Shisa9	0	-1.3426	0.406	0.848	0
Pde10a	0	-1.08951	0.779	0.927	0
Qk	0	-1.19425	0.318	0.715	0
Dlgap1	0	-0.999075	0.951	0.971	0
Nrxn1	0	0.667469	1	0.986	0
Dtna	0	0.729281	0.956	0.841	0
Atp8b1	0	0.575385	0.464	0.162	0
Trpm3	0	1.55694	0.954	0.775	0
Fras1	8.81685e-303	0.865017	0.742	0.452	2.3362e-298
Tmem108	7.63791e-297	0.813721	0.949	0.856	2.02382e-292
Chrnb3	1.44361e-292	0.558685	0.649	0.293	3.82512e-288
Ttc6	1.10491e-289	0.758752	0.712	0.407	2.92768e-285
Nhs	1.42459e-288	0.674808	0.833	0.564	3.77473e-284
Tnr	7.57152e-285	-1.18518	0.498	0.792	2.00623e-280
Wnt5a	5.65358e-284	0.435354	0.382	0.14	1.49803e-279
Tmem132d	1.62062e-282	-1.1927	0.068	0.44	4.29414e-278
Ano4	3.6934e-282	0.733012	0.857	0.658	9.7864e-278
Zmat4	2.07776e-280	-1.23822	0.194	0.569	5.50543e-276
Syt16	4.16517e-278	0.672622	0.923	0.798	1.10365e-273
Alk	4.143e-277	0.944699	0.713	0.436	1.09777e-272
Zfp618	3.17429e-275	0.668847	0.831	0.659	8.41091e-271
Antxr2	3.45729e-275	0.48137	0.342	0.117	9.16078e-271
Cdh18	4.56102e-275	-1.2802	0.762	0.906	1.20853e-270
Adamtsl3	6.40988e-274	0.404596	0.278	0.082	1.69843e-269
Klhl1	5.1259e-272	0.551286	0.979	0.615	1.35821e-267
Gm16263	1.87102e-271	0.297248	0.245	0.064	4.95763e-267
Sv2c	1.24452e-270	-1.59403	0.116	0.468	3.29759e-266
Ldlrad4	6.28126e-270	-0.824268	0.629	0.854	1.66435e-265
Camk2a	3.03957e-268	-1.09224	0.505	0.764	8.05396e-264
Lrfn5	9.68838e-267	-0.609855	0.974	0.951	2.56713e-262
A330015K06Rik	5.93215e-266	-0.810304	0.06	0.42	1.57184e-261
Hdac9	4.46575e-263	-1.15604	0.839	0.924	1.18329e-258
Lingo2	1.647e-261	0.763871	0.946	0.925	4.36405e-257
Diaph2	1.72429e-261	-0.75566	0.551	0.822	4.56884e-257
Adgrl3	2.24967e-261	0.596684	0.995	0.964	5.96096e-257
Epb41l4a	2.67024e-261	0.645334	0.723	0.431	7.07535e-257
Setbp1	1.69432e-259	0.667567	0.95	0.886	4.48944e-255
Snhg11	8.16099e-259	0.376659	1	0.994	2.16242e-254
Shisa6	4.49698e-257	0.691249	0.845	0.59	1.19156e-252
Kcnk13	1.3803e-250	0.578098	0.41	0.166	3.65738e-246
Neto1	9.21398e-250	-1.09866	0.07	0.413	2.44143e-245
Kcnn2	3.64824e-249	0.634151	0.907	0.771	9.66675e-245
Epb41l3	1.59072e-247	0.564021	0.912	0.7	4.21492e-243
Pcdh9	8.84589e-247	-1.33043	0.917	0.962	2.3439e-242
Unc5c	1.70046e-246	-0.862474	0.77	0.927	4.50572e-242
Thsd7b	1.71465e-245	0.516895	0.801	0.499	4.54331e-241
Gm13629	9.50373e-243	0.669348	0.745	0.511	2.5182e-238
N4bp2	9.00972e-240	0.56816	0.628	0.38	2.3873e-235
9030622O22Rik	4.61778e-239	0.380801	0.699	0.324	1.22357e-234
Sema6d	8.81086e-239	0.865675	0.956	0.809	2.33461e-234
Mdga2	3.8871e-238	0.490543	0.997	0.972	1.02997e-233
Cacng3	4.32063e-238	0.604961	0.792	0.57	1.14484e-233
Kcnq3	2.82926e-237	-0.745061	0.77	0.924	7.4967e-233
Prkce	5.96371e-237	-0.63904	0.892	0.927	1.5802e-232
Sash1	9.85539e-237	-0.62666	0.101	0.447	2.61138e-232
Cpne6	1.08295e-235	-0.520638	0.116	0.471	2.86949e-231
Tmem163	1.39613e-235	0.676411	0.718	0.459	3.69931e-231
Zdhhc14	1.53243e-235	-0.768053	0.484	0.754	4.06049e-231
Adgra3	5.04033e-235	0.461172	0.374	0.155	1.33554e-230
Pcdh10	3.23801e-233	0.572163	0.813	0.611	8.57976e-229
Mical2	7.44456e-233	-0.674037	0.3	0.63	1.97258e-228
Thrb	8.13769e-233	-1.06027	0.536	0.759	2.15624e-228
Ntm	1.36087e-232	-1.13236	0.662	0.864	3.60591e-228
Tll1	6.3552e-232	-1.12035	0.056	0.384	1.68394e-227
B230217J21Rik	1.76654e-231	0.43885	0.391	0.155	4.68081e-227
Lrtm1	3.29964e-228	0.59209	0.625	0.386	8.74304e-224
Ghr	9.08695e-228	-1.1924	0.305	0.636	2.40777e-223
Adcy8	3.15715e-227	0.61839	0.794	0.529	8.36549e-223
Clgn	3.82981e-227	0.677066	0.657	0.439	1.01478e-222
Tmem132b	3.65239e-226	-0.667595	0.66	0.83	9.67774e-222
C130071C03Rik	5.22758e-226	0.589426	0.89	0.734	1.38515e-221
Gm48091	1.9432e-225	-0.591693	0.234	0.595	5.1489e-221
Slc1a2	1.62017e-224	-0.934686	0.42	0.705	4.29296e-220
Grm5	5.33525e-221	-1.02847	0.895	0.919	1.41368e-216
Klf12	5.89289e-221	0.601492	0.933	0.829	1.56144e-216
Slc25a13	1.19365e-218	0.419031	0.452	0.21	3.16282e-214
Me3	1.99941e-216	-0.658616	0.526	0.768	5.29784e-212
Gm37459	3.03686e-214	-0.520742	0.081	0.401	8.04678e-210
Npas2	1.12114e-211	-0.655467	0.094	0.411	2.97069e-207
Tmem26	9.98867e-208	0.289682	0.262	0.086	2.6467e-203
Spon1	1.02658e-207	0.870902	0.65	0.43	2.72013e-203
Ebf1	1.03745e-206	0.405089	0.584	0.309	2.74892e-202
Klhdc10	3.29452e-206	0.535051	0.923	0.883	8.7295e-202
Miat	3.726e-206	-0.547768	0.688	0.862	9.87278e-202
Eda	4.58194e-206	-0.68571	0.153	0.48	1.21408e-201
Sdk1	9.0124e-206	0.822177	0.854	0.725	2.38802e-201
Satb1	1.85359e-204	-0.810481	0.206	0.51	4.91146e-200
Hlf	1.28618e-203	0.612869	0.603	0.388	3.408e-199
Amph	4.88406e-203	0.482972	0.951	0.897	1.29413e-198
Ubap1l	1.57577e-202	0.465824	0.603	0.37	4.17531e-198
Pde3a	1.88828e-200	0.513112	0.281	0.099	5.00337e-196
Pcsk1n	4.51442e-200	0.64762	0.945	0.896	1.19619e-195
Smyd3	4.90707e-200	0.493869	0.97	0.912	1.30023e-195
Cacna2d2	8.3432e-200	0.48233	0.81	0.576	2.2107e-195
Etv5	1.45096e-199	-0.673802	0.196	0.505	3.84461e-195
Cntnap3	1.97567e-199	0.57299	0.361	0.154	5.23493e-195
Wipf3	2.39354e-199	-0.506871	0.225	0.556	6.34216e-195
Tanc1	4.72631e-199	-0.715679	0.065	0.364	1.25233e-194
Sdc2	8.79861e-199	0.572729	0.817	0.615	2.33137e-194
Syn3	1.00132e-198	0.571259	0.914	0.805	2.6532e-194
Cald1	5.29192e-198	0.408942	0.51	0.265	1.4022e-193
Epha6	7.20001e-197	0.646024	0.971	0.882	1.90779e-192
Gria1	1.89137e-196	-1.01962	0.804	0.904	5.01156e-192
Msra	2.44098e-196	-0.860127	0.49	0.71	6.46787e-192
Dock10	1.14115e-195	0.345444	0.691	0.45	3.0237e-191
Adgrv1	1.41757e-195	0.65037	0.493	0.258	3.75615e-191
Mkx	5.05301e-195	0.518428	0.597	0.338	1.3389e-190
Arap2	2.66527e-194	-0.539868	0.218	0.545	7.06217e-190
Prkcg	1.26586e-193	-0.601381	0.394	0.682	3.35415e-189
Syndig1	3.96701e-193	-0.600507	0.068	0.36	1.05114e-188
Fgf13	1.37247e-192	0.651166	0.895	0.762	3.63664e-188
Trpc4	7.93721e-192	-0.677228	0.127	0.439	2.10312e-187
Robo2	9.03664e-192	0.603066	0.974	0.863	2.39444e-187
Kcnip4	1.32042e-191	0.452658	0.996	0.971	3.49872e-187
Lrmda	2.30017e-191	-0.956261	0.132	0.426	6.09477e-187
Nos1ap	5.10887e-190	-0.840489	0.58	0.794	1.3537e-185
Gm48749	5.79114e-190	-0.42256	0.067	0.365	1.53448e-185
Rnf112	3.86064e-189	-0.583672	0.292	0.595	1.02295e-184
Glp2r	4.67216e-189	-0.729369	0.197	0.499	1.23798e-184
4930467D21Rik	7.95089e-189	0.541619	0.306	0.119	2.10675e-184
Gas7	8.98793e-189	-0.65679	0.169	0.467	2.38153e-184
2010300C02Rik	2.07476e-188	-0.595766	0.143	0.448	5.49748e-184
Plekha5	1.1578e-185	0.441306	0.975	0.933	3.06783e-181
Ptk2b	1.32794e-185	-0.663546	0.065	0.348	3.51864e-181
Pbx1	1.39178e-185	0.422378	0.994	0.962	3.6878e-181
Sh3rf3	3.91376e-181	-0.596248	0.417	0.695	1.03703e-176
Rmst	8.00945e-180	0.939734	0.704	0.489	2.12226e-175
Gda	9.24224e-180	-0.628588	0.056	0.332	2.44892e-175
Slit2	5.46101e-179	0.778212	0.816	0.658	1.447e-174
Epha7	5.44583e-178	-0.68646	0.301	0.593	1.44298e-173
Tcf4	6.76542e-178	-0.907867	0.569	0.812	1.79263e-173
Sntg1	3.47774e-177	0.692096	0.982	0.949	9.21497e-173
Kctd16	7.39161e-176	1.09515	0.779	0.56	1.95856e-171
Grid1	7.67156e-176	0.482779	0.973	0.933	2.03273e-171
Emb	1.37555e-175	-0.312362	0.085	0.383	3.64478e-171
Rph3a	1.20206e-174	-0.583451	0.255	0.549	3.1851e-170
Lepr	1.8567e-174	0.470827	0.453	0.231	4.91969e-170
Sfmbt2	2.77668e-174	0.577892	0.474	0.265	7.35737e-170
Shank2	2.15912e-173	-0.540785	0.652	0.824	5.72102e-169
Gm26905	1.88009e-172	-1.08681	0.511	0.7	4.98166e-168
Foxn3	5.22156e-172	0.417565	0.912	0.853	1.38356e-167
Il1rapl2	5.69535e-172	0.96444	0.793	0.614	1.5091e-167
Zbtb20	1.09037e-171	0.304202	0.976	0.912	2.88914e-167
Ret	3.30815e-171	0.353728	0.787	0.458	8.76562e-167
Ust	9.48026e-171	-0.668419	0.059	0.325	2.51198e-166
Col12a1	1.6661e-170	0.416662	0.23	0.079	4.41467e-166
Gm20754	5.5842e-170	-1.21898	0.237	0.508	1.47964e-165
Gm33680	3.11036e-169	0.294314	0.249	0.087	8.24151e-165
Pacrg	6.1857e-168	-0.563433	0.391	0.68	1.63903e-163
Hecw1	1.25051e-167	0.523209	0.948	0.895	3.31348e-163
Glce	1.65831e-167	0.58765	0.714	0.574	4.39402e-163
Ncam1	1.88377e-167	0.332296	0.992	0.963	4.99143e-163
Tle4	2.03091e-167	-0.579554	0.285	0.584	5.38129e-163
Mllt3	2.045e-167	-0.520378	0.703	0.863	5.41864e-163
Utrn	5.7371e-167	0.709786	0.549	0.34	1.52016e-162
4921518K17Rik	2.48505e-166	0.377695	0.387	0.184	6.58464e-162
Sox6	1.025e-164	-1.35678	0.102	0.358	2.71593e-160
Map3k5	4.95614e-164	-0.468737	0.283	0.585	1.31323e-159
Csgalnact1	2.23361e-163	-0.656278	0.105	0.369	5.9184e-159
Kcnq5	2.77722e-163	-1.60806	0.49	0.696	7.3588e-159
Ildr2	1.60238e-162	-0.632279	0.306	0.586	4.24582e-158
Ptprq	1.10721e-161	0.838568	0.401	0.229	2.93378e-157
Cplx2	1.10931e-161	-0.419935	0.223	0.522	2.93933e-157
Khdrbs3	1.14021e-161	-0.961725	0.535	0.733	3.02121e-157
Mitf	2.41949e-161	-0.453724	0.203	0.504	6.41093e-157
Dscam	9.3707e-161	0.356872	0.992	0.93	2.48295e-156
Slc17a7	1.48949e-160	-0.62659	0.083	0.341	3.94669e-156
Fam189a1	1.5603e-160	-0.627132	0.73	0.842	4.13432e-156
Nrg1	4.22812e-160	-0.873264	0.833	0.928	1.12032e-155
Zfhx3	1.81826e-159	-1.45551	0.698	0.749	4.81783e-155
Vsnl1	2.85864e-159	-0.665659	0.811	0.91	7.57453e-155
Rgs11	2.34781e-158	-0.384598	0.233	0.526	6.22098e-154
Frmd3	2.0509e-157	0.485684	0.778	0.66	5.43428e-153
Cacnb2	7.09586e-157	-0.550758	0.97	0.945	1.88019e-152
Ftx	2.31435e-156	0.425935	0.949	0.901	6.13233e-152
Pdcd7	1.47228e-155	0.4395	0.617	0.43	3.9011e-151
Anks1b	3.64285e-155	-0.423633	0.994	0.978	9.65245e-151
Mtcl1	4.00011e-155	-0.420238	0.298	0.59	1.05991e-150
Lrrc7	9.83287e-155	-0.69627	0.977	0.954	2.60542e-150
Scn1a	3.58791e-153	0.434505	0.904	0.844	9.50688e-149
Mtss1	4.52552e-153	0.408963	0.834	0.723	1.19913e-148
Gabrb1	5.30307e-153	-0.581526	0.933	0.946	1.40515e-148
Hs3st4	5.67685e-153	-1.70124	0.177	0.432	1.50419e-148
Gm11844	6.6158e-153	0.341016	0.331	0.149	1.75299e-148
Arhgap20	1.3052e-152	0.497498	0.729	0.595	3.4584e-148
Cnih3	1.37575e-152	-0.45438	0.039	0.282	3.64534e-148
Ajap1	2.74727e-152	-0.451345	0.36	0.641	7.27944e-148
Cdh9	8.18473e-152	-0.714853	0.224	0.505	2.16871e-147
Frem1	1.14066e-151	0.390517	0.396	0.2	3.02241e-147
St6gal1	1.47486e-151	-0.394952	0.102	0.37	3.90793e-147
Carmil1	2.6488e-151	0.426614	0.817	0.695	7.01853e-147
Ccser1	8.45259e-151	0.274636	0.995	0.965	2.23968e-146
Rora	1.87101e-150	0.384945	0.971	0.946	4.95761e-146
Fam135b	2.52288e-150	-0.607538	0.837	0.881	6.68487e-146
Syt17	5.75625e-150	-0.595737	0.321	0.571	1.52523e-145
Iqsec1	1.00669e-149	-0.465958	0.702	0.858	2.66744e-145
Cntn6	1.89485e-149	-0.669491	0.385	0.638	5.02079e-145
Il1rapl1	8.12432e-148	0.365297	0.995	0.913	2.1527e-143
Zbtb16	4.77917e-147	-0.417176	0.081	0.335	1.26634e-142
Adgra1	1.30934e-146	-0.417716	0.299	0.584	3.46937e-142
Gm4876	6.66049e-146	0.441496	0.649	0.446	1.76483e-141
Nell2	7.24179e-146	-0.726191	0.679	0.812	1.91886e-141
Bend6	1.12176e-145	0.439543	0.854	0.777	2.97232e-141
Rbfox3	1.42193e-144	-0.481897	0.719	0.854	3.76769e-140
Ptpre	3.7186e-144	-0.410753	0.311	0.593	9.85316e-140
Zfpm2	8.33584e-144	-1.30721	0.115	0.355	2.20875e-139
Nbea	8.83275e-144	-0.352901	0.986	0.971	2.34041e-139
Pkp2	1.24377e-143	-0.335218	0.033	0.267	3.29562e-139
Pvt1	2.3258e-143	-0.466447	0.377	0.654	6.16267e-139
Cdh2	4.96676e-143	-0.582409	0.786	0.873	1.31604e-138
Mgat4c	6.01139e-143	1.07269	0.882	0.833	1.59284e-138
Rgs6	1.11495e-142	-1.08125	0.488	0.685	2.95428e-138
Mast4	1.18971e-142	-0.734627	0.735	0.855	3.15238e-138
Galntl6	1.41073e-142	-1.47822	0.923	0.904	3.73802e-138
Tmem200a	1.69842e-142	-0.409131	0.199	0.481	4.50031e-138
Zfp385b	2.09231e-142	-0.98124	0.415	0.633	5.544e-138
Kcnh5	2.59975e-142	-0.612396	0.118	0.366	6.88855e-138
Ptprk	3.80956e-142	0.904003	0.774	0.689	1.00942e-137
Grm1	4.17818e-142	-1.03049	0.557	0.721	1.10709e-137
4930509J09Rik	6.14517e-141	-0.604207	0.088	0.335	1.62829e-136
Pcdh19	8.59411e-140	-0.446357	0.225	0.512	2.27718e-135
Kcns3	1.27649e-139	-0.567897	0.043	0.27	3.3823e-135
Synpo	1.5655e-139	-0.324419	0.035	0.264	4.14812e-135
Usp29	9.19717e-139	0.378201	0.984	0.882	2.43698e-134
Trps1	1.49873e-138	-0.901445	0.57	0.759	3.97119e-134
Dpy19l1	2.14903e-138	-0.348014	0.091	0.342	5.69429e-134
Slc17a6	1.44779e-137	0.296127	0.539	0.3	3.83621e-133
Lrrk2	1.67331e-137	-0.339338	0.13	0.393	4.43376e-133
Park2	3.91012e-137	-0.386889	0.951	0.962	1.03606e-132
Bcl11b	9.01355e-137	-0.493882	0.084	0.322	2.38832e-132
Cdh4	3.06784e-136	0.494621	0.819	0.691	8.12887e-132
Gm48003	3.28142e-136	0.397939	0.425	0.243	8.69479e-132
Mpp6	6.88901e-136	-0.525374	0.403	0.645	1.82538e-131
Fhit	1.95667e-134	0.568367	0.912	0.881	5.18458e-130
Slit3	7.09957e-134	-1.32181	0.348	0.563	1.88117e-129
Lhfp	1.93352e-133	-0.800518	0.181	0.421	5.12324e-129
Osbpl3	2.65884e-133	-0.513689	0.179	0.429	7.04513e-129
Glra2	9.10437e-133	-0.525775	0.072	0.305	2.41238e-128
Atrnl1	1.21721e-132	-0.676718	0.767	0.853	3.22525e-128
Myo16	2.89345e-132	0.646996	0.67	0.507	7.66677e-128
Rbms1	8.58751e-132	0.597659	0.701	0.576	2.27543e-127
Adamts6	8.72647e-132	-0.582575	0.213	0.461	2.31225e-127
Zfp536	1.13066e-131	0.380052	0.491	0.285	2.99592e-127
Gphn	4.85591e-131	0.266322	0.993	0.982	1.28667e-126
Ttc28	5.56124e-131	0.392324	0.871	0.715	1.47356e-126
B3gat1	9.99746e-131	0.403401	0.588	0.428	2.64903e-126
Ppp4r4	3.21202e-130	-0.424564	0.346	0.606	8.51088e-126
Gfod1	1.28832e-129	-0.388758	0.333	0.594	3.41366e-125
Slco2a1	1.53804e-129	-0.372338	0.084	0.319	4.07534e-125
Sgcd	2.18981e-129	0.657067	0.942	0.892	5.80234e-125
Mgll	3.80702e-129	-0.342356	0.069	0.3	1.00875e-124
Lmx1b	5.33714e-129	0.321847	0.601	0.357	1.41418e-124
Dscaml1	6.92176e-129	-0.859281	0.225	0.461	1.83406e-124
Kitl	2.92798e-128	-0.558627	0.038	0.252	7.75826e-124
Caln1	4.16891e-128	-0.752577	0.729	0.786	1.10464e-123
Tcf12	5.08608e-128	0.383615	0.91	0.866	1.34766e-123
Atp2b1	1.31272e-127	-0.840317	0.705	0.828	3.47832e-123
Lzts1	1.43255e-126	-0.350904	0.099	0.333	3.79582e-122
Rtn4rl1	5.50974e-125	-0.369446	0.062	0.283	1.45992e-120
Sox5	1.33356e-123	-0.989012	0.196	0.427	3.53354e-119
Meis2	1.50601e-123	-1.12564	0.04	0.246	3.99047e-119
Camk2d	5.84392e-123	0.496077	0.945	0.884	1.54846e-118
Fbn1	3.28335e-122	0.437277	0.48	0.313	8.69989e-118
Htr7	6.4255e-122	0.508399	0.436	0.263	1.70256e-117
Dlgap2	1.32031e-121	-1.00876	0.811	0.807	3.49843e-117
Cdh20	1.382e-121	0.62253	0.622	0.444	3.66189e-117
Wdpcp	7.51236e-121	0.943361	0.621	0.532	1.99055e-116
Rasal1	2.72314e-120	-0.294763	0.051	0.266	7.2155e-116
Hace1	8.714e-120	-0.370243	0.419	0.665	2.30895e-115
Pgap1	1.25592e-119	0.459702	0.745	0.653	3.32782e-115
Ociad2	1.39224e-119	-0.282445	0.179	0.438	3.68902e-115
Rasgrp1	2.99354e-119	-0.476101	0.129	0.356	7.93197e-115
Fam172a	3.15325e-119	-0.3837	0.727	0.868	8.35517e-115
Gm16226	5.49195e-119	0.376146	0.43	0.268	1.4552e-114
Zfp831	6.84814e-119	-0.284426	0.023	0.222	1.81455e-114
Ispd	8.45483e-119	0.46137	0.754	0.671	2.24028e-114
Nr2f2	1.01728e-118	-0.367356	0.077	0.296	2.6955e-114
Trim9	1.09777e-118	-0.465423	0.817	0.888	2.90876e-114
Slc7a8	1.2377e-118	-0.335572	0.269	0.523	3.27953e-114
Kcnip3	1.63816e-118	-0.486741	0.287	0.529	4.34064e-114
Gm21798	2.10421e-118	0.409016	0.536	0.342	5.57552e-114
Kcnma1	3.67836e-118	-0.406361	0.987	0.965	9.74654e-114
Luzp2	4.71934e-118	-0.882985	0.628	0.767	1.25048e-113
Gm12239	1.49112e-117	-0.444348	0.039	0.242	3.95102e-113
Scn9a	3.99989e-117	0.334798	0.835	0.683	1.05985e-112
Celf3	5.40534e-117	-0.374733	0.558	0.782	1.43225e-112
Nr3c1	5.64308e-117	-0.436838	0.237	0.479	1.49525e-112
Kcnn3	2.16493e-116	-0.684845	0.51	0.682	5.7364e-112
Ppp2r2b	3.26866e-116	-0.406188	0.976	0.955	8.66097e-112
0610040J01Rik	1.29056e-115	-0.301626	0.034	0.234	3.41961e-111
5031415H12Rik	1.6176e-115	-0.258944	0.069	0.284	4.28615e-111
Fndc3a	1.92832e-115	0.275387	0.863	0.769	5.10948e-111
Slc8a3	5.2285e-115	0.376798	0.858	0.754	1.38539e-110
Ypel2	1.18257e-114	-0.403851	0.369	0.616	3.13346e-110
Bmpr1b	2.31369e-114	-0.419131	0.026	0.217	6.13059e-110
Klhl13	5.62059e-114	-0.473121	0.221	0.457	1.48929e-109
Nlk	6.3226e-114	-0.46564	0.774	0.873	1.6753e-109
Icam5	7.81789e-114	-0.303431	0.054	0.259	2.07151e-109
Gm26565	1.39587e-113	-0.260484	0.021	0.21	3.69863e-109
Fmnl2	2.94512e-113	0.341947	0.918	0.867	7.80368e-109
Chst11	5.22054e-113	-0.44521	0.329	0.58	1.38329e-108
Fryl	7.52563e-113	-0.505267	0.653	0.809	1.99407e-108
Fign	1.73316e-112	-0.602365	0.032	0.223	4.59235e-108
Cntn5	4.44877e-112	0.495608	0.886	0.763	1.17879e-107
Cacnb4	1.34261e-111	-0.559214	0.831	0.888	3.55751e-107
Socs2	1.48062e-111	-0.367031	0.248	0.486	3.9232e-107
A830082K12Rik	2.15123e-111	-0.490043	0.213	0.436	5.70012e-107
Tmem178	2.87739e-111	-0.372763	0.097	0.314	7.62422e-107
Pde4b	6.00275e-111	-0.760887	0.749	0.876	1.59055e-106
Ankrd33b	1.41435e-110	-0.334897	0.014	0.195	3.74759e-106
Cachd1	2.25102e-110	0.376021	0.703	0.549	5.96453e-106
En2	2.8058e-110	0.270709	0.314	0.157	7.43454e-106
Pgbd5	4.05873e-110	-0.332935	0.355	0.609	1.07544e-105
Kalrn	5.68614e-109	-0.610295	0.942	0.939	1.50666e-104
Garem1	6.27835e-109	-0.379822	0.376	0.613	1.66357e-104
Large1	9.21102e-109	-0.415983	0.954	0.946	2.44064e-104
Tiam2	1.01458e-108	-0.345476	0.094	0.306	2.68833e-104
Kctd17	2.64848e-108	-0.295841	0.225	0.477	7.01766e-104
Oprk1	4.29266e-108	-0.399511	0.108	0.318	1.13742e-103
6530403H02Rik	3.46298e-107	-1.13883	0.088	0.282	9.17586e-103
Aifm3	5.34961e-107	-0.323702	0.201	0.439	1.41749e-102
Il1rap	5.37561e-107	-0.609992	0.49	0.669	1.42437e-102
Nek7	1.46194e-106	-0.267327	0.061	0.263	3.8737e-102
Atp1a1	4.05531e-106	-0.29464	0.227	0.477	1.07453e-101
Ankrd55	4.52044e-106	0.317497	0.638	0.456	1.19778e-101
Phldb2	8.5175e-106	0.447038	0.446	0.268	2.25688e-101
Tmem132c	8.59833e-106	-0.438399	0.051	0.243	2.2783e-101
Fat3	8.75328e-106	0.379278	0.94	0.846	2.31936e-101
Zeb2	1.80576e-105	0.587479	0.504	0.321	4.78473e-101
Pard3	2.18588e-105	0.315999	0.788	0.643	5.79193e-101
Syt7	3.65816e-105	-0.458391	0.611	0.76	9.69303e-101
Cblb	5.78257e-105	-0.319784	0.316	0.568	1.53221e-100
Dgkg	8.06035e-105	-0.723852	0.297	0.508	2.13575e-100
Nkain3	2.51612e-104	-0.941577	0.599	0.736	6.66698e-100
Mast3	3.78888e-104	-0.364386	0.141	0.357	1.00394e-99
Nfib	4.13261e-104	-1.13904	0.212	0.403	1.09502e-99
Lrp8	6.24215e-104	0.441901	0.689	0.626	1.65398e-99
Igsf21	8.49348e-104	-0.323233	0.173	0.398	2.25052e-99
Nck2	2.13454e-103	-0.282674	0.172	0.401	5.65589e-99
Grik4	3.27268e-103	0.296784	0.822	0.657	8.67162e-99
Grin3a	4.18762e-103	0.392271	0.72	0.546	1.10959e-98
Nexmif	5.10616e-103	0.367262	0.865	0.798	1.35298e-98
Igf1	7.11802e-103	-0.415621	0.06	0.251	1.88606e-98
Cacna1d	7.5745e-103	-0.33149	0.921	0.933	2.00702e-98
Nrgn	1.01691e-102	-0.558403	0.36	0.574	2.6945e-98
Mmd2	1.10571e-102	-0.253475	0.065	0.266	2.92979e-98
Gm48321	2.69411e-102	-0.285297	0.114	0.327	7.13858e-98
Lin7a	2.84061e-102	0.5081	0.771	0.694	7.52675e-98
Zfp697	3.64805e-102	-0.424926	0.376	0.606	9.66625e-98
Elavl4	4.20951e-102	0.321735	0.928	0.838	1.11539e-97
Nr2f1	9.57863e-102	-0.271824	0.075	0.275	2.53805e-97
Ddah1	9.9749e-102	0.364497	0.712	0.59	2.64305e-97
Dgkh	1.7934e-101	-0.41393	0.667	0.807	4.75196e-97
Ipcef1	1.9506e-101	-0.264919	0.079	0.281	5.16849e-97
Mlip	4.45862e-101	-0.49364	0.114	0.318	1.1814e-96
Atxn1	4.47644e-101	-0.347242	0.956	0.949	1.18612e-96
Dpyd	5.78159e-101	-0.835276	0.655	0.761	1.53195e-96
Ppfibp1	1.19434e-100	-0.299275	0.111	0.326	3.16464e-96
Cdh7	5.47716e-100	0.486137	0.599	0.45	1.45128e-95
Klhl29	1.08627e-99	0.388479	0.922	0.857	2.87828e-95
Ptchd1	2.61236e-99	-0.326969	0.177	0.41	6.92196e-95
Pou6f2	3.18636e-99	-0.728337	0.122	0.323	8.44289e-95
Tox3	3.22597e-99	0.571772	0.701	0.581	8.54784e-95
Bsn	4.97027e-99	-0.38582	0.675	0.799	1.31697e-94
Sclt1	5.54423e-99	0.325073	0.894	0.851	1.46905e-94
Zfhx4	7.90268e-99	0.479157	0.738	0.578	2.09397e-94
Nkain2	9.95861e-99	0.400355	0.999	0.973	2.63873e-94
Nrip3	2.16002e-98	-0.31637	0.23	0.456	5.72341e-94
Plppr1	2.24689e-98	0.482613	0.735	0.656	5.95359e-94
Synj2	2.99617e-98	-0.257846	0.09	0.292	7.93895e-94
Cux2	8.05798e-98	-0.437467	0.458	0.641	2.13512e-93
Man1c1	1.28667e-97	-0.311397	0.259	0.487	3.4093e-93
Zfp804b	1.5005e-97	-1.01794	0.255	0.473	3.97587e-93
Cntnap5b	3.416e-97	-0.761712	0.505	0.695	9.05137e-93
Nr3c2	5.83688e-97	0.356762	0.862	0.807	1.5466e-92
Sez6	8.46556e-97	-0.276748	0.153	0.369	2.24312e-92
Sdccag8	9.75572e-97	-0.320954	0.565	0.765	2.58497e-92
Camk4	4.79927e-96	-0.524784	0.592	0.748	1.27166e-91
Gm13944	1.61773e-95	-0.3052	0.109	0.315	4.28649e-91
Cpne4	2.64505e-95	0.46837	0.876	0.794	7.00859e-91
Gfra2	3.51468e-95	-0.263875	0.046	0.225	9.31285e-91
Ulk4	5.07575e-95	-0.255972	0.265	0.507	1.34492e-90
Atp10a	2.58248e-94	-0.302591	0.029	0.197	6.8428e-90
Gm15155	3.21878e-94	-0.416886	0.23	0.452	8.52879e-90
Itga8	4.06785e-94	-0.365231	0.041	0.213	1.07786e-89
Slc39a12	5.22047e-94	-0.265503	0.059	0.243	1.38327e-89
Adgrb2	5.65128e-94	-0.275868	0.275	0.511	1.49742e-89
Zfyve28	9.67313e-94	-0.340843	0.369	0.58	2.56309e-89
Fam81a	1.03698e-93	-0.276023	0.115	0.311	2.74768e-89
March3	1.11867e-93	-0.314606	0.153	0.366	2.96413e-89
Oprm1	2.73217e-93	-0.344092	0.182	0.404	7.23942e-89
Myo1d	5.39325e-93	-0.292012	0.315	0.557	1.42905e-88
Olfm1	6.07205e-93	-0.476913	0.399	0.595	1.60891e-88
Phactr2	7.01408e-93	-0.435552	0.306	0.518	1.85852e-88
Grin2b	9.53062e-93	-0.457965	0.988	0.956	2.52533e-88
Arhgap18	9.9378e-93	0.36411	0.735	0.628	2.63322e-88
Slc6a3	1.03642e-92	-1.10557	0.237	0.393	2.74621e-88
Ntrk3	1.04368e-92	-0.511835	0.836	0.862	2.76544e-88
A830018L16Rik	1.66254e-92	-0.930523	0.482	0.624	4.40524e-88
Pkia	1.85695e-92	0.351744	0.873	0.828	4.92036e-88
Sema5b	2.39787e-92	0.286062	0.36	0.203	6.35362e-88
Plxdc2	2.43487e-92	-0.918728	0.392	0.566	6.45168e-88
Smad3	3.42778e-92	-0.299192	0.065	0.247	9.08259e-88
Pcsk1	3.91588e-92	-0.346057	0.154	0.36	1.03759e-87
Mvb12b	5.04248e-92	0.313287	0.765	0.715	1.33611e-87
Ccdc30	9.13054e-92	-0.302715	0.437	0.67	2.41932e-87
Chl1	2.12012e-91	0.3524	0.88	0.818	5.61768e-87
Gm45881	2.63083e-91	0.381546	0.833	0.729	6.97091e-87
Thsd7a	1.04178e-90	0.419763	0.793	0.69	2.76042e-86
Ccdc171	1.54082e-90	-0.403229	0.309	0.518	4.08272e-86
Shc3	2.14428e-90	-0.431593	0.435	0.646	5.68169e-86
Myo3a	2.47763e-90	0.310139	0.251	0.128	6.56496e-86
Parm1	6.72152e-90	-0.374181	0.222	0.439	1.781e-85
A830036E02Rik	7.11464e-90	-0.286939	0.011	0.163	1.88517e-85
Sh3kbp1	7.47328e-90	0.362	0.818	0.733	1.9802e-85
Ssbp2	1.43517e-89	0.337598	0.921	0.861	3.80277e-85
Grin2a	3.43684e-89	0.39059	0.967	0.858	9.1066e-85
2810049E08Rik	3.9641e-89	0.346979	0.435	0.299	1.05037e-84
Tcte2	5.30289e-89	0.378408	0.8	0.724	1.40511e-84
Gm2164	5.58079e-89	-0.332765	0.074	0.256	1.47874e-84
Srrm4	1.61172e-88	-0.497885	0.58	0.734	4.27057e-84
Unc13b	3.88742e-88	-0.384542	0.492	0.687	1.03005e-83
March11	1.47738e-87	-0.406218	0.363	0.573	3.91461e-83
Kmt2a	2.06008e-87	0.288377	0.944	0.919	5.45858e-83
Igsf11	2.3197e-87	-0.289626	0.035	0.197	6.1465e-83
Ccdc148	2.10669e-86	-0.324995	0.545	0.74	5.58209e-82
Grb10	4.46847e-86	0.261289	0.917	0.794	1.18401e-81
Xkr6	4.67783e-86	0.311938	0.949	0.775	1.23948e-81
Plekhg5	6.57346e-86	-0.250355	0.164	0.367	1.74177e-81
Fmn1	1.60271e-85	0.514782	0.748	0.681	4.2467e-81
Gm13269	4.45361e-85	-0.274577	0.319	0.543	1.18007e-80
Prkag2	1.00682e-84	-0.441795	0.592	0.74	2.66776e-80
Fndc3b	1.69501e-84	0.363672	0.687	0.599	4.49127e-80
Dach1	1.83526e-84	-0.708087	0.103	0.277	4.86289e-80
Tshz3	2.07047e-84	-0.468357	0.194	0.385	5.48612e-80
Ccbe1	3.02987e-84	-0.325426	0.032	0.187	8.02824e-80
Dlgap4	3.80237e-84	-0.33102	0.621	0.78	1.00752e-79
Mipol1	4.07607e-84	0.369583	0.68	0.589	1.08004e-79
Slit1	1.00635e-83	-0.35473	0.346	0.561	2.66652e-79
Wasf1	1.17986e-83	-0.398978	0.454	0.637	3.12627e-79
Gsg1l	1.22836e-83	-0.318087	0.197	0.408	3.25479e-79
Cap2	1.454e-83	-0.387677	0.566	0.738	3.85266e-79
Nabp1	1.71867e-83	0.266017	0.264	0.141	4.55397e-79
Nrcam	3.26244e-83	-0.407995	0.925	0.923	8.64449e-79
Arid1b	3.40923e-83	-0.327114	0.783	0.878	9.03343e-79
Cabp1	3.7939e-83	-0.291818	0.196	0.396	1.00527e-78
Man2a1	4.34562e-83	0.473483	0.601	0.497	1.15146e-78
Btbd3	4.64587e-83	-0.257616	0.268	0.496	1.23102e-78
Slc12a2	6.04058e-83	0.323043	0.577	0.481	1.60057e-78
Nnat	7.40623e-83	-0.712378	0.497	0.697	1.96243e-78
Pde7b	1.71044e-82	-0.850239	0.267	0.447	4.53216e-78
AC149090.1	3.00632e-82	0.281792	0.99	0.968	7.96585e-78
Lrrn3	5.76316e-82	0.373527	0.623	0.522	1.52706e-77
Arid5b	8.42602e-82	0.368696	0.784	0.687	2.23264e-77
Igsf3	1.80214e-81	0.261856	0.421	0.273	4.77513e-77
Pou2f2	1.85041e-81	-0.288348	0.238	0.452	4.90303e-77
Otof	1.89805e-81	-0.294881	0.015	0.156	5.02926e-77
Osbpl9	2.04593e-81	0.268284	0.938	0.884	5.42111e-77
Baiap2	2.35702e-81	-0.425453	0.224	0.405	6.24539e-77
Fam196a	2.53582e-81	0.261365	0.324	0.188	6.71917e-77
Ptpn3	2.89262e-81	-0.577474	0.219	0.41	7.66458e-77
Nfix	3.17951e-81	-0.317177	0.098	0.273	8.42475e-77
Ptn	8.22925e-81	-0.486307	0.221	0.423	2.1805e-76
Hs3st2	1.05796e-80	-0.301222	0.009	0.147	2.80327e-76
Trpc6	1.06841e-80	0.574019	0.631	0.507	2.83096e-76
Dab1	3.70145e-80	-0.551861	0.931	0.895	9.80772e-76
Pdzd2	3.893e-80	-0.319606	0.193	0.402	1.03153e-75
Nrg3	4.37361e-80	0.337881	1	0.978	1.15887e-75
Lix1	4.39104e-80	-0.667655	0.238	0.423	1.16349e-75
Ak5	5.75081e-80	-0.75216	0.463	0.6	1.52379e-75
2010111I01Rik	1.15628e-79	-0.330324	0.782	0.877	3.06381e-75
Dgkz	1.52692e-79	-0.297558	0.418	0.625	4.04588e-75
Enox1	1.86847e-79	-0.609287	0.746	0.821	4.95088e-75
Akap13	2.17286e-79	-0.352769	0.373	0.59	5.75743e-75
Egfem1	2.697e-79	-0.874404	0.448	0.621	7.14625e-75
Inpp4b	3.16392e-79	-0.583745	0.672	0.811	8.38343e-75
Pcdh15	3.27566e-79	-0.480419	0.754	0.886	8.67951e-75
Fam19a5	6.7354e-79	0.363138	0.835	0.777	1.78468e-74
Pdgfc	4.25967e-78	-0.33181	0.243	0.439	1.12869e-73
Cdkal1	4.59883e-78	0.307074	0.833	0.809	1.21855e-73
Rapgef5	5.12418e-78	-0.515914	0.663	0.747	1.35775e-73
Atp1a3	5.17386e-78	0.276539	0.921	0.895	1.37092e-73
Srgap3	6.01948e-78	-0.309053	0.911	0.917	1.59498e-73
Jazf1	6.11286e-78	-0.316837	0.796	0.878	1.61972e-73
Stau2	1.28579e-77	0.276189	0.936	0.907	3.40696e-73
Vwc2l	1.28974e-77	-0.919528	0.501	0.613	3.41744e-73
Cnr1	2.37734e-77	-0.338658	0.12	0.298	6.29923e-73
Scg5	3.46805e-77	0.295407	0.892	0.871	9.18928e-73
Gm15398	3.52387e-77	-0.350188	0.413	0.644	9.3372e-73
Atp8a1	4.90039e-77	0.268748	0.903	0.836	1.29846e-72
Dpf3	5.96583e-77	0.251746	0.36	0.214	1.58076e-72
Tfdp2	7.16687e-77	0.336284	0.745	0.692	1.899e-72
Angpt1	7.63387e-77	-0.338482	0.023	0.163	2.02275e-72
Actr3b	1.20473e-76	-0.266025	0.391	0.596	3.19218e-72
Pde8b	1.552e-76	0.256051	0.801	0.641	4.11235e-72
Gad1	1.92303e-76	-0.499618	0.088	0.25	5.09546e-72
AC129186.1	2.25642e-76	-1.05007	0.099	0.249	5.97884e-72
Zfp609	2.56658e-76	0.2845	0.844	0.818	6.80067e-72
Hcn1	3.77794e-76	-0.966754	0.464	0.576	1.00104e-71
Stac	2.88577e-75	-0.264878	0.031	0.174	7.64644e-71
Ell2	3.05471e-75	-0.295471	0.158	0.345	8.09407e-71
Wdr17	4.09457e-75	-0.464013	0.574	0.738	1.08494e-70
Arl15	5.26901e-75	-0.439749	0.819	0.87	1.39613e-70
Gm48742	5.75404e-75	-0.345355	0.284	0.482	1.52465e-70
Nsmf	1.45386e-74	-0.303021	0.381	0.593	3.8523e-70
Ntrk2	1.45603e-74	-0.346338	0.928	0.936	3.85803e-70
Prkar2b	2.36902e-74	0.38813	0.612	0.533	6.27718e-70
Ptprr	3.42536e-74	0.550172	0.791	0.751	9.07617e-70
Cck	4.24771e-74	-0.450298	0.296	0.498	1.12552e-69
Zfp280d	4.60197e-74	0.276455	0.88	0.855	1.21938e-69
Olfm3	1.07281e-73	-0.724268	0.466	0.589	2.84262e-69
Dclk1	1.28159e-73	-0.349657	0.971	0.952	3.39584e-69
Gabra5	3.51238e-73	-0.30008	0.153	0.332	9.30676e-69
Ptprt	3.73475e-73	-0.982535	0.325	0.498	9.89598e-69
Gm3764	4.85274e-73	-0.373392	0.113	0.287	1.28583e-68
Lrrtm4	6.43652e-73	-0.63518	0.824	0.882	1.70548e-68
Arhgap10	7.07205e-73	-0.277276	0.103	0.267	1.87388e-68
Mctp2	7.32904e-73	-0.289211	0.092	0.255	1.94198e-68
Pcp4	1.29762e-72	-0.4352	0.274	0.475	3.43831e-68
Rap1gds1	1.38697e-72	-0.36647	0.777	0.863	3.67506e-68
Dlc1	2.06152e-72	-0.473592	0.535	0.697	5.46241e-68
Gm26691	2.13442e-72	0.372113	0.794	0.715	5.65558e-68
Crtac1	2.6825e-72	-0.308763	0.157	0.334	7.10781e-68
Mcu	2.70908e-72	0.326919	0.798	0.757	7.17826e-68
Ccnd2	3.45621e-72	-0.263279	0.081	0.239	9.15792e-68
Tmem178b	4.02697e-72	-0.3307	0.979	0.964	1.06703e-67
Airn	7.58494e-72	0.403099	0.564	0.452	2.00978e-67
Galnt9	1.14688e-71	-0.318162	0.246	0.432	3.03889e-67
Ubash3b	1.51623e-71	0.264764	0.624	0.484	4.01755e-67
Ophn1	2.98781e-71	0.294839	0.719	0.671	7.91681e-67
Nos1	4.00473e-71	-0.252873	0.059	0.209	1.06113e-66
Gm16168	1.59738e-70	-0.302008	0.096	0.263	4.23258e-66
Trpc3	5.23743e-70	-0.319907	0.043	0.181	1.38776e-65
Csmd1	7.35253e-70	-0.264598	0.998	0.978	1.9482e-65
Stum	8.93805e-70	-0.292354	0.132	0.297	2.36832e-65
Slc35f4	9.1219e-70	-0.267258	0.457	0.671	2.41703e-65
Phactr1	1.28053e-69	-1.10783	0.905	0.869	3.39303e-65
Spock1	1.63676e-69	-0.820969	0.652	0.697	4.33691e-65
Zcchc11	3.62226e-69	0.266926	0.897	0.876	9.59789e-65
Celf4	3.63494e-69	-0.308846	0.968	0.948	9.6315e-65
Cobl	4.10681e-69	0.314713	0.754	0.644	1.08818e-64
Lrrtm3	9.92886e-69	0.363889	0.89	0.802	2.63085e-64
Scml4	1.85379e-68	-0.279717	0.265	0.462	4.91198e-64
Tbl1xr1	2.04238e-68	-0.269754	0.371	0.57	5.4117e-64
Robo1	3.05085e-68	-0.492508	0.954	0.926	8.08383e-64
Gm26848	3.62062e-68	-0.411986	0.993	0.973	9.59355e-64
Acadsb	4.03566e-68	0.290844	0.789	0.758	1.06933e-63
Lrrn2	1.4295e-67	-0.283799	0.494	0.678	3.78776e-63
Rftn1	1.5303e-67	-0.26191	0.09	0.247	4.05484e-63
P3h2	1.67311e-67	-0.261577	0.185	0.365	4.43323e-63
Ywhaz	1.73972e-67	-0.303505	0.676	0.812	4.60975e-63
Slc4a4	1.84785e-67	-0.567308	0.132	0.29	4.89625e-63
Sgcz	3.15944e-67	0.252777	0.972	0.891	8.37157e-63
Nell1	3.97298e-67	-0.716211	0.377	0.548	1.05272e-62
Las1l	4.72725e-67	0.327722	0.78	0.751	1.25258e-62
Gm45844	6.54896e-67	0.337971	0.632	0.557	1.73528e-62
Pappa	1.45431e-66	-0.379665	0.097	0.249	3.85347e-62
Arhgef12	2.74486e-66	0.270646	0.876	0.869	7.27305e-62
Rimbp2	3.05904e-66	-0.33743	0.773	0.848	8.10554e-62
Tenm2	4.22224e-66	-0.672893	0.898	0.94	1.11877e-61
Ctnna1	1.02817e-65	-0.45279	0.342	0.51	2.72435e-61
Slc24a2	1.31132e-65	-0.763792	0.838	0.857	3.47462e-61
Stxbp6	4.24289e-65	0.418827	0.429	0.291	1.12424e-60
Spag16	4.28106e-65	-0.268593	0.101	0.255	1.13435e-60
Zfp423	5.0063e-65	0.261923	0.624	0.509	1.32652e-60
3110021N24Rik	1.05622e-64	0.304443	0.731	0.674	2.79867e-60
3300002A11Rik	1.25848e-64	-0.47381	0.233	0.405	3.3346e-60
Lancl1	2.43687e-64	0.302584	0.706	0.66	6.45698e-60
Plce1	4.66503e-64	-0.286612	0.098	0.25	1.23609e-59
Pitpnm3	8.5414e-64	-0.262521	0.393	0.58	2.26322e-59
Tmtc1	1.23905e-63	-0.370949	0.504	0.671	3.28311e-59
Ctnna3	1.40595e-63	0.306014	0.917	0.844	3.72533e-59
Upp2	1.54808e-63	0.260267	0.945	0.922	4.10196e-59
Pls3	1.69104e-63	-0.265509	0.35	0.546	4.48074e-59
Arsb	1.84394e-63	-0.281567	0.426	0.618	4.88589e-59
A330102I10Rik	2.2777e-63	0.286783	0.613	0.481	6.03522e-59
Pou3f2	2.43953e-63	-0.268971	0.102	0.25	6.46402e-59
Sept11	4.39828e-63	-0.279268	0.463	0.642	1.16541e-58
Hs3st5	4.98874e-63	-0.512962	0.402	0.597	1.32187e-58
Nrp2	5.67148e-63	-0.338932	0.225	0.399	1.50277e-58
Gsdme	1.11842e-62	-0.365248	0.544	0.695	2.96348e-58
Kcna1	2.29589e-62	-0.29637	0.192	0.361	6.08342e-58
Esyt2	7.69902e-62	-0.29258	0.763	0.853	2.04001e-57
Rasgrf2	1.03946e-61	-0.378395	0.601	0.715	2.75427e-57
Grm3	3.48292e-61	-0.540601	0.346	0.523	9.22868e-57
Gaa	9.17317e-61	0.293751	0.685	0.615	2.43062e-56
R3hdm1	8.47323e-60	-0.411979	0.943	0.945	2.24515e-55
Ptprm	8.53059e-60	-0.829489	0.312	0.449	2.26035e-55
Plekhh2	9.50515e-60	0.317015	0.573	0.479	2.51858e-55
Khdrbs2	3.23461e-59	-0.49388	0.732	0.841	8.57076e-55
Rspo2	3.71579e-59	-0.278942	0.034	0.153	9.84573e-55
Xylt1	4.30924e-59	-0.520377	0.559	0.701	1.14182e-54
Brinp2	4.31191e-59	-0.37991	0.496	0.652	1.14253e-54
Spag5	4.37029e-59	-0.387395	0.598	0.752	1.15799e-54
Gm32647	5.54943e-59	-1.37275	0.32	0.471	1.47043e-54
Mir124a-1hg	6.17312e-59	-0.325122	0.733	0.815	1.63569e-54
Cpe	6.21656e-59	-0.365345	0.845	0.898	1.6472e-54
Lmo4	8.3065e-59	-0.263141	0.339	0.53	2.20097e-54
Npas3	2.11848e-58	-0.911278	0.509	0.649	5.61334e-54
Gm29514	5.99027e-58	0.320011	0.433	0.324	1.58724e-53
Gm27151	7.73116e-58	0.259802	0.229	0.13	2.04853e-53
Astn2	8.01874e-58	-0.369786	0.773	0.857	2.12473e-53
Gabra2	9.2889e-58	-0.691028	0.602	0.683	2.46128e-53
Adgrb1	9.60952e-58	-0.344379	0.492	0.651	2.54623e-53
L3mbtl4	1.07641e-57	-0.294835	0.141	0.294	2.85217e-53
Psap	1.24741e-57	0.278593	0.764	0.74	3.30525e-53
Gab1	1.25414e-57	-0.302107	0.049	0.174	3.32309e-53
Drd2	1.8252e-57	-0.675678	0.261	0.372	4.83622e-53
Gpr158	6.82854e-57	-0.583718	0.979	0.948	1.80936e-52
Dtnb	7.67899e-57	-0.254132	0.856	0.901	2.0347e-52
Syn2	9.51294e-57	-0.559716	0.735	0.762	2.52064e-52
Rab3b	1.0796e-56	-0.277902	0.078	0.213	2.86062e-52
Prickle1	1.55662e-56	-0.383906	0.838	0.881	4.12458e-52
Cdh8	1.61372e-56	-0.412089	0.654	0.806	4.27588e-52
E130307A14Rik	2.15075e-56	0.267237	0.788	0.773	5.69885e-52
Sorcs3	4.15806e-56	-0.718678	0.52	0.626	1.10176e-51
Plekhg1	1.30537e-55	-0.899195	0.063	0.183	3.45883e-51
Cntnap2	2.72811e-55	0.26339	0.993	0.969	7.22867e-51
Grb14	3.038e-55	-0.254902	0.311	0.491	8.0498e-51
Gprin3	7.93762e-55	0.277928	0.555	0.46	2.10323e-50
Htt	8.26859e-55	0.252317	0.795	0.788	2.19093e-50
Adamts2	1.50745e-54	-0.292347	0.131	0.274	3.9943e-50
Grin2d	2.7473e-54	0.253606	0.496	0.391	7.27953e-50
Lpp	7.28252e-54	-0.382981	0.456	0.61	1.92965e-49
Podxl2	8.64649e-54	0.287757	0.682	0.626	2.29106e-49
Sv2a	1.0148e-53	0.275576	0.765	0.734	2.68893e-49
Tmem130	1.28159e-53	0.294299	0.76	0.728	3.39582e-49
Lmo3	1.78071e-53	-0.30841	0.311	0.501	4.71836e-49
Prlr	2.48759e-53	-0.5161	0.06	0.18	6.59137e-49
Itgbl1	2.72592e-53	-0.265211	0.234	0.4	7.22288e-49
Adamts9	2.88256e-53	0.271336	0.25	0.15	7.63793e-49
Cep112	3.11346e-53	-0.590479	0.327	0.477	8.24973e-49
Mpped1	3.57795e-53	-0.274946	0.153	0.3	9.4805e-49
4930517O19Rik	4.07341e-53	0.296755	0.571	0.481	1.07933e-48
Tcf7l2	1.09822e-52	-0.790091	0.058	0.173	2.90995e-48
Tspan5	1.38114e-52	0.377152	0.765	0.738	3.65961e-48
Chn1	1.70444e-52	0.299962	0.876	0.865	4.51626e-48
Peak1	1.8851e-52	-0.324893	0.754	0.85	4.99494e-48
B230334C09Rik	4.05766e-52	-0.323797	0.444	0.611	1.07516e-47
Gm28905	4.13697e-52	-0.332322	0.453	0.64	1.09617e-47
Col23a1	4.81642e-52	-0.27514	0.065	0.185	1.27621e-47
Nrp1	5.77993e-52	-0.370894	0.229	0.386	1.53151e-47
Cdc7	6.17483e-52	0.296265	0.518	0.436	1.63614e-47
Rapgef4	8.21068e-52	-0.279028	0.911	0.895	2.17558e-47
Fbxw7	1.15145e-51	-0.25009	0.563	0.722	3.051e-47
Nptn	2.00789e-51	-0.256227	0.911	0.929	5.3203e-47
Bbx	2.12659e-51	0.285481	0.684	0.645	5.63482e-47
Foxp1	2.86298e-51	0.324965	0.769	0.751	7.58605e-47
Nrg2	3.29378e-51	0.251089	0.842	0.798	8.72754e-47
Homer1	3.95557e-51	-0.382353	0.505	0.659	1.04811e-46
Hpcal1	3.95663e-51	0.281844	0.5	0.393	1.04839e-46
Iqsec2	4.51443e-51	-0.253123	0.511	0.668	1.19619e-46
Pde1c	7.79387e-51	-0.401986	0.163	0.307	2.06514e-46
D3Ertd751e	1.04526e-50	0.278863	0.673	0.614	2.76964e-46
Adra1a	1.07142e-50	-0.265511	0.088	0.214	2.83894e-46
Bcl11a	1.53081e-50	-0.431885	0.336	0.482	4.05618e-46
Maml3	3.11977e-50	-0.488461	0.566	0.677	8.26645e-46
Sorcs1	3.33641e-50	-0.760396	0.459	0.591	8.84048e-46
Msh3	5.55987e-50	-0.266091	0.421	0.594	1.4732e-45
Med12l	6.94679e-50	0.250169	0.912	0.887	1.84069e-45
Ptpru	9.26697e-50	-0.383167	0.403	0.536	2.45547e-45
Gm28376	1.20466e-48	-0.287321	0.213	0.364	3.192e-44
Ext1	1.29147e-48	-0.456929	0.807	0.871	3.42201e-44
Trhde	1.36133e-48	-0.461907	0.197	0.335	3.60713e-44
Ripor2	1.50503e-48	-0.303668	0.483	0.623	3.98789e-44
Gpc3	2.70728e-48	-0.268478	0.035	0.139	7.17347e-44
Nxph1	4.07756e-48	-1.50683	0.341	0.462	1.08043e-43
Lamb1	5.8276e-48	0.299954	0.334	0.241	1.54414e-43
Prkd1	7.75473e-48	-0.266959	0.17	0.313	2.05477e-43
Nckap5	9.72225e-48	1.04947	0.495	0.47	2.57611e-43
Dapk1	2.41901e-47	-0.259973	0.712	0.815	6.40966e-43
Slc35f1	2.59275e-47	-0.604915	0.844	0.843	6.87001e-43
Acap2	9.79396e-47	-0.281883	0.611	0.739	2.59511e-42
Sgk1	1.26647e-46	0.257111	0.657	0.58	3.35576e-42
9530036O11Rik	1.75503e-46	0.295104	0.472	0.38	4.6503e-42
Ddhd1	1.80348e-46	0.262404	0.713	0.708	4.77869e-42
C530008M17Rik	2.56944e-46	0.254435	0.747	0.647	6.80825e-42
Tshz2	3.33665e-46	-0.684941	0.213	0.341	8.84111e-42
Cplx1	5.29172e-46	-0.369927	0.489	0.625	1.40215e-41
Rorb	1.02042e-45	-0.813936	0.125	0.244	2.70381e-41
Grk4	2.47325e-45	0.297133	0.466	0.382	6.55338e-41
Mob3b	2.52439e-45	-0.472633	0.218	0.344	6.68889e-41
Magi3	2.70696e-45	-0.300722	0.756	0.83	7.17264e-41
Lrrc4c	2.9601e-45	-0.702156	0.938	0.953	7.84338e-41
Spock3	3.28624e-45	0.309453	0.823	0.721	8.70755e-41
March4	7.12737e-45	-0.462194	0.563	0.677	1.88854e-40
Rock2	1.47496e-44	-0.258057	0.787	0.867	3.9082e-40
Vstm2a	2.11729e-44	0.267852	0.548	0.474	5.61018e-40
Camkv	3.82882e-44	-0.261806	0.406	0.551	1.01452e-39
Abcb7	4.54258e-44	0.253874	0.571	0.513	1.20365e-39
Gm20696	4.89626e-44	0.293022	0.715	0.698	1.29736e-39
Gramd1b	5.54487e-44	-0.254449	0.713	0.82	1.46923e-39
Ppm1e	1.45259e-43	-0.302568	0.856	0.889	3.84893e-39
Gm5441	1.67482e-43	0.273459	0.529	0.47	4.43778e-39
Pak7	5.97294e-43	-0.332268	0.688	0.792	1.58265e-38
Ano10	6.88403e-43	0.27697	0.507	0.435	1.82406e-38
Tdp1	1.45878e-42	0.272733	0.47	0.404	3.86533e-38
Tacc1	2.39362e-42	-0.257246	0.609	0.751	6.34237e-38
Gm26883	3.2e-42	-0.444679	0.142	0.26	8.47903e-38
Cpne8	5.77617e-42	-0.335365	0.349	0.496	1.53051e-37
Mtus2	1.00012e-41	0.363344	0.727	0.711	2.65003e-37
Tmem164	1.41907e-41	-0.28953	0.461	0.598	3.76012e-37
Ttc4	2.91293e-41	0.263943	0.578	0.538	7.7184e-37
Ctsb	4.11539e-41	0.255197	0.541	0.478	1.09046e-36
Clmn	7.61079e-41	-0.37173	0.256	0.393	2.01663e-36
Lef1	1.00518e-40	-0.712202	0.021	0.102	2.66341e-36
Calm2	1.41401e-40	-0.294375	0.836	0.903	3.74671e-36
Sipa1l1	5.31974e-40	-0.310552	0.78	0.831	1.40957e-35
Cntn3	1.9563e-39	-0.468121	0.461	0.577	5.1836e-35
Npsr1	2.00828e-39	-0.415251	0.05	0.143	5.32133e-35
Aldh1a1	3.45326e-39	-0.643512	0.126	0.234	9.15011e-35
Cttnbp2	3.6166e-39	-0.468836	0.849	0.88	9.58291e-35
Irs1	4.30912e-39	0.255936	0.489	0.422	1.14179e-34
Slc16a2	1.68047e-38	-0.259335	0.548	0.697	4.45274e-34
Galnt18	3.52491e-38	-0.413553	0.443	0.547	9.33996e-34
Mapk4	7.23939e-38	-0.295659	0.234	0.361	1.91822e-33
Nrg3os	9.094e-38	0.28991	0.928	0.876	2.40964e-33
Gtdc1	1.16638e-37	0.258964	0.756	0.729	3.09056e-33
Cdh11	1.4372e-37	-0.513519	0.705	0.76	3.80814e-33
Adcy2	2.14865e-37	-0.269196	0.432	0.59	5.69328e-33
Spats2l	4.73261e-37	-0.356152	0.531	0.636	1.254e-32
Klhl2	5.80327e-37	-0.298176	0.495	0.642	1.53769e-32
Ralyl	1.02155e-36	-0.331937	0.979	0.956	2.7068e-32
Rcan2	1.08921e-36	-0.454192	0.726	0.746	2.88609e-32
Oxr1	1.18958e-36	-0.89327	0.745	0.739	3.15204e-32
Cacul1	1.33989e-36	0.253029	0.634	0.627	3.5503e-32
Tenm4	2.78106e-36	-0.471219	0.817	0.847	7.36899e-32
Apba2	4.29905e-36	-0.293452	0.712	0.782	1.13912e-31
Akap17b	1.53703e-35	0.250902	0.526	0.489	4.07268e-31
Prkcd	1.05003e-34	-0.445835	0.052	0.138	2.78227e-30
Zkscan16	1.22949e-34	0.271706	0.534	0.486	3.25777e-30
Gm46102	2.15582e-34	0.275296	0.304	0.222	5.71228e-30
Tmem59l	8.02818e-34	0.262863	0.518	0.461	2.12723e-29
Mir9-3hg	8.92454e-34	-0.255366	0.274	0.403	2.36473e-29
Mbp	1.26773e-32	-0.442976	0.304	0.448	3.3591e-28
Gpr137c	1.83229e-32	0.273065	0.697	0.656	4.85502e-28
Msi2	4.11231e-32	-0.663882	0.9	0.901	1.08964e-27
Glra3	4.21178e-32	0.327965	0.583	0.503	1.11599e-27
Chrm2	1.05539e-31	0.470684	0.333	0.248	2.79645e-27
Cdh12	1.35284e-31	-0.412436	0.387	0.519	3.58461e-27
Syt9	1.90407e-31	-0.25303	0.33	0.462	5.04522e-27
9530059O14Rik	2.06951e-31	-0.436516	0.847	0.814	5.48359e-27
Plcxd3	4.26341e-31	-0.446437	0.713	0.735	1.12968e-26
Arhgap24	4.66185e-31	0.411216	0.529	0.475	1.23525e-26
Rgl1	1.12245e-30	-0.265612	0.592	0.691	2.97417e-26
Ptpn5	1.24042e-30	-0.311009	0.697	0.783	3.28674e-26
Mad1l1	9.80547e-30	-0.32576	0.713	0.815	2.59816e-25
Acvr2a	1.51145e-29	-0.264088	0.554	0.674	4.00488e-25
1700042O10Rik	6.50139e-29	-0.286839	0.77	0.469	1.72267e-24
Btbd11	9.69772e-29	-0.366847	0.567	0.606	2.56961e-24
Map7	1.44293e-28	-0.264307	0.644	0.759	3.82334e-24
Glis3	2.09224e-28	-0.330075	0.056	0.131	5.54382e-24
Epn2	3.27266e-28	-0.272479	0.587	0.727	8.67158e-24
Epha10	3.32155e-28	-0.252133	0.604	0.682	8.80112e-24
Gm28928	4.24391e-28	-1.7326	0.223	0.309	1.12451e-23
Unc5d	1.8052e-27	-0.565563	0.528	0.631	4.78324e-23
D430041D05Rik	5.4436e-26	-0.254453	0.773	0.819	1.44239e-21
Etl4	6.32155e-26	-0.50005	0.781	0.813	1.67502e-21
Kcnd3	8.7013e-26	-0.465115	0.853	0.873	2.30558e-21
Elmo1	1.15939e-25	0.36787	0.689	0.696	3.07204e-21
Plpp4	1.64249e-25	-0.297702	0.141	0.229	4.3521e-21
Hsp90ab1	4.53194e-25	-0.258798	0.733	0.836	1.20083e-20
Calm1	1.29793e-24	-0.293739	0.863	0.904	3.43913e-20
Adarb1	1.51844e-24	-0.383297	0.613	0.712	4.0234e-20
Rbfox1	2.49777e-23	-0.623115	0.816	0.84	6.61833e-19
Ddc	2.89281e-23	-0.353991	0.82	0.514	7.66508e-19
Rnf220	3.9637e-23	-0.812093	0.428	0.546	1.05026e-18
Tacr3	2.42188e-21	-0.256956	0.123	0.202	6.41725e-17
Brinp1	3.91744e-21	-0.281216	0.797	0.812	1.038e-16
Atp1a2	4.44971e-21	-0.251637	0.055	0.118	1.17904e-16
Zbtb7c	8.1884e-21	0.260516	0.366	0.303	2.16968e-16
Adgrl2	9.50677e-21	-0.277268	0.556	0.643	2.51901e-16
Cdh6	5.39022e-20	0.497404	0.339	0.281	1.42825e-15
Pard3b	2.10457e-19	-0.436053	0.263	0.359	5.57648e-15
Ptpn4	6.03667e-19	-0.340015	0.763	0.829	1.59954e-14
Cdh13	9.71721e-19	-0.55542	0.848	0.777	2.57477e-14
Ttr	1.43651e-18	-0.334379	0.274	0.383	3.80631e-14
Ptprj	3.01862e-18	-0.287459	0.756	0.813	7.99844e-14
Hivep2	3.6723e-18	-0.279299	0.92	0.915	9.73048e-14
Cdkl5	4.66309e-18	-0.256451	0.558	0.641	1.23558e-13
Etv1	1.01538e-17	-0.259722	0.257	0.345	2.69047e-13
Pdzrn3	3.96954e-17	-0.371143	0.208	0.291	1.05181e-12
Pigk	5.53103e-17	-0.262387	0.718	0.767	1.46556e-12
Fth1	1.49019e-16	-0.262745	0.728	0.823	3.94855e-12
5730522E02Rik	3.97841e-16	-0.460025	0.721	0.743	1.05416e-11
Frmd4b	2.05719e-15	-0.569118	0.64	0.642	5.45095e-11
Dlg2	3.08815e-15	-0.317221	0.998	0.985	8.18268e-11
Gfra1	3.53337e-14	-0.279041	0.555	0.415	9.36237e-10
Pcdh17	9.34856e-14	-0.261016	0.534	0.603	2.47709e-09
Ptgds	5.08107e-13	-0.437559	0.221	0.307	1.34633e-08
Prr16	4.12229e-12	-0.438523	0.777	0.749	1.09228e-07
Apoe	5.04926e-12	-0.300762	0.22	0.301	1.3379e-07
Fstl4	9.859e-12	-0.414473	0.346	0.392	2.61234e-07
Camk1d	1.42263e-11	-0.263486	0.937	0.948	3.76954e-07
Sntg2	2.73214e-11	-0.300456	0.198	0.259	7.23936e-07
Cul4b	1.30671e-10	0.310713	0.341	0.318	3.4624e-06
Th	3.43765e-10	-0.493278	0.429	0.406	9.10873e-06
Ankfn1	9.35939e-09	0.293461	0.41	0.395	0.000247996
St6galnac5	1.93246e-08	-0.348803	0.691	0.667	0.000512045
Col11a1	2.9527e-07	-0.284067	0.241	0.285	0.00782377
Nyap2	3.38577e-07	-0.27688	0.869	0.846	0.00897126
Gpm6b	4.91572e-07	-0.396543	0.676	0.701	0.0130252
Alcam	2.45181e-06	-0.307215	0.695	0.694	0.0649657
Plp1	3.17864e-06	-0.674632	0.25	0.312	0.0842245
Grip1	9.32913e-06	-0.395259	0.958	0.933	0.247194
B3galt1	1.38928e-05	-0.370222	0.961	0.952	0.368116
Rfx3	3.07999e-05	-0.395636	0.735	0.777	0.816105
Pde1a	5.78712e-05	-0.552531	0.84	0.763	1
Sh3d19	0.00027072	-0.254127	0.577	0.657	1
Erc2	0.000716979	-0.305705	0.997	0.969	1
Chrm3	0.00118347	0.507357	0.448	0.547	1
Gpc6	0.00173478	-0.406804	0.914	0.757	1
Pitpnc1	0.00272437	-0.273158	0.677	0.638	1
Nfia	0.0102999	-0.296341	0.339	0.369	1
Cntnap4	0.0337734	-0.250452	0.771	0.733	1
Edil3	0.0347441	-0.288718	0.71	0.602	1
Cadps2	0.0427443	-0.495858	0.81	0.722	1
Frmpd4	0.0612261	-0.316087	0.787	0.786	1
Dgkb	0.146603	-0.300217	0.948	0.93	1
Ptprd	0.15465	-0.652113	0.993	0.972	1
Fam19a2	0.167266	-0.354381	0.615	0.589	1
Ldb2	0.198889	-0.25346	0.633	0.582	1
Kcnj6	0.350335	-0.533768	0.883	0.836	1
Kirrel3	0.383056	-0.31139	0.855	0.82	1
Kcnh7	0.496046	-0.312115	0.761	0.674	1
Asic2	0.879453	-0.508187	0.928	0.837	1
Kcnc2	0.975149	-0.412965	0.854	0.794	1
Pcdh11x	0.981349	-0.317331	0.448	0.458	1

[truncated: 19 more sheets: c_8, c_9, c_10, c_11, c_12, c_13, c_14, c_15, c_16, c_17, c_18, c_19, c_20, c_21, c_22, c_23, c_24, c_25, c_26]
