# Supplementary material for: Transcriptomic atlas of midbrain dopamine neurons uncovers differential vulnerability in a Parkinsonism lesion model
Source: eLife. 2024 Apr 8;12:RP89482. doi: 10.7554/eLife.89482 (PMC11001297; doi:10.7554/eLife.89482)
Supplement: Supplementary file 2. [file elife-89482-supp2.xlsx]

## Sheet: readme
DE	cluster markers of dopaminergic dataset
test	Wilcoxon Rank Sum test
assay	RNA
slot	data
gene logfc.threshold	0.25
genes in min.pct	0.1

## Sheet: allclustersmarkers
cluster	gene	p_val	avg_log2FC	pct.1	pct.2	p_val_adj	pct.ratio
c_01.csv	Sulf1	0	1.94531	0.963	0.218	0	0.226376
c_01.csv	Gm2694	0	1.74777	0.948	0.157	0	0.165612
c_01.csv	Cbln1	0	0.657119	0.573	0.063	0	0.109948
c_01.csv	Gm27016	0	0.695806	0.561	0.054	0	0.0962567
c_01.csv	Htr2a	0	1.16971	0.68	0.091	0	0.133824
c_01.csv	Sema5b	0	2.70686	0.988	0.226	0	0.228745
c_01.csv	Pdia5	2.43046e-271	1.67314	0.955	0.329	6.44e-267	0.344503
c_01.csv	Unc5d	1.69093e-258	2.63275	1	0.53	4.48045e-254	0.53
c_01.csv	Il1rapl2	2.51226e-239	2.49992	1	0.677	6.65674e-235	0.677
c_01.csv	Cdh4	8.24366e-232	1.97853	0.995	0.761	2.18432e-227	0.764824
c_01.csv	Prkg1	5.9881e-229	1.77095	1	0.965	1.58667e-224	0.965
c_01.csv	Grin2a	2.20606e-210	1.68743	1	0.845	5.84539e-206	0.845
c_01.csv	Necab1	3.99159e-210	1.72449	0.998	0.494	1.05765e-205	0.49499
c_01.csv	Cacna2d3	1.92599e-207	1.51688	1	0.874	5.10329e-203	0.874
c_01.csv	Zfhx3	3.45046e-188	1.21162	1	0.899	9.14269e-184	0.899
c_01.csv	Slc44a5	1.16236e-185	1.56583	0.995	0.596	3.0799e-181	0.598995
c_01.csv	Zfp521	3.01079e-178	1.32774	0.98	0.545	7.97769e-174	0.556122
c_01.csv	March1	3.08889e-172	-2.89294	0.382	0.906	8.18464e-168	2.37173
c_01.csv	Negr1	3.5051e-171	1.41184	1	0.963	9.28747e-167	0.963
c_01.csv	Rora	2.00223e-170	1.16201	1	0.96	5.30532e-166	0.96
c_01.csv	Ndst3	2.7162e-169	1.52965	0.99	0.568	7.19713e-165	0.573737
c_01.csv	B3glct	4.21265e-168	1.01484	0.903	0.397	1.11623e-163	0.439646
c_01.csv	Gpc6	1.56608e-167	1.4881	1	0.898	4.14964e-163	0.898
c_01.csv	Cdh13	2.04336e-162	-2.33153	0.382	0.89	5.41428e-158	2.32984
c_01.csv	Spock3	2.50625e-162	1.4248	0.998	0.728	6.6408e-158	0.729459
c_01.csv	Rxfp2	4.61817e-162	0.507266	0.543	0.111	1.22368e-157	0.20442
c_01.csv	Cthrc1	7.69645e-161	0.724373	0.633	0.164	2.03933e-156	0.259084
c_01.csv	Rbms3	1.62439e-160	1.08472	1	0.942	4.30415e-156	0.942
c_01.csv	Il1rapl1	8.02943e-160	1.42909	0.998	0.882	2.12756e-155	0.883768
c_01.csv	Fat3	1.51811e-159	1.18291	1	0.858	4.02253e-155	0.858
c_01.csv	Ebf3	2.01127e-154	1.27709	0.998	0.554	5.32927e-150	0.55511
c_01.csv	Lepr	4.18082e-154	0.940004	0.859	0.319	1.10779e-149	0.371362
c_01.csv	Adcy2	6.82567e-153	1.36249	0.97	0.566	1.8086e-148	0.583505
c_01.csv	Sgcd	1.24433e-150	1.21216	1	0.932	3.2971e-146	0.932
c_01.csv	Pcdh15	6.55263e-150	-2.69486	0.511	0.91	1.73625e-145	1.78082
c_01.csv	Kcnk9	5.08266e-149	0.81937	0.806	0.285	1.34675e-144	0.353598
c_01.csv	Grip1	1.70266e-142	-1.70851	0.854	0.96	4.51153e-138	1.12412
c_01.csv	Ctdspl	1.43165e-139	1.00156	0.99	0.831	3.79345e-135	0.839394
c_01.csv	Postn	6.95739e-136	0.519267	0.218	0.023	1.8435e-131	0.105505
c_01.csv	Lncenc1	4.65129e-135	0.532225	0.531	0.124	1.23245e-130	0.233522
c_01.csv	Arl15	1.19276e-134	1.29838	0.995	0.881	3.16045e-130	0.885427
c_01.csv	Sgcz	7.04643e-133	-2.66009	0.692	0.924	1.86709e-128	1.33526
c_01.csv	Tmcc3	1.24294e-131	1.18639	0.988	0.645	3.29341e-127	0.652834
c_01.csv	Cdh11	5.68128e-131	-2.16388	0.288	0.798	1.50537e-126	2.77083
c_01.csv	Iqsec3	7.04294e-127	1.0165	0.958	0.708	1.86617e-122	0.73904
c_01.csv	Lmx1a	2.62996e-126	0.998077	0.945	0.486	6.96861e-122	0.514286
c_01.csv	Ntrk3	2.14291e-125	0.92794	1	0.893	5.67806e-121	0.893
c_01.csv	Tox3	1.96204e-123	1.09703	0.98	0.708	5.19881e-119	0.722449
c_01.csv	Cdh8	2.2528e-123	-2.44269	0.531	0.859	5.96924e-119	1.6177
c_01.csv	Pou2f2	1.46228e-121	0.90483	0.876	0.445	3.87461e-117	0.507991
c_01.csv	Btbd11	3.9515e-120	0.99759	0.99	0.759	1.04703e-115	0.766667
c_01.csv	Cntnap2	1.51708e-117	0.929427	1	0.987	4.0198e-113	0.987
c_01.csv	Ncam2	1.91176e-117	1.11531	1	0.912	5.0656e-113	0.912
c_01.csv	Kirrel3	1.88501e-115	-2.34623	0.357	0.813	4.9947e-111	2.27731
c_01.csv	Ldb2	3.73146e-114	0.999298	0.965	0.544	9.88724e-110	0.563731
c_01.csv	Plcb1	1.57606e-113	0.842607	1	0.942	4.17609e-109	0.942
c_01.csv	Inpp4b	7.92526e-113	-2.05176	0.417	0.831	2.09996e-108	1.99281
c_01.csv	Mpped2	8.27101e-113	0.903918	1	0.881	2.19157e-108	0.881
c_01.csv	Slc8a1	1.16071e-112	0.790191	1	0.968	3.07553e-108	0.968
c_01.csv	Cpne5	1.44597e-112	0.654037	0.663	0.229	3.8314e-108	0.3454
c_01.csv	Csmd1	6.93545e-112	0.556897	1	0.99	1.83769e-107	0.99
c_01.csv	Gm11844	1.16318e-111	0.522645	0.546	0.15	3.08208e-107	0.274725
c_01.csv	Nnat	2.16609e-109	1.01984	0.99	0.719	5.7395e-105	0.726263
c_01.csv	Rims2	6.78473e-109	0.67961	1	0.978	1.79775e-104	0.978
c_01.csv	Gm2164	8.59809e-109	0.833329	0.789	0.362	2.27824e-104	0.458809
c_01.csv	Pard3b	3.10725e-108	0.837461	0.826	0.337	8.23329e-104	0.40799
c_01.csv	Runx2	1.33032e-106	0.96026	0.901	0.535	3.52496e-102	0.593785
c_01.csv	Grik4	1.10074e-105	-1.13573	0.216	0.758	2.91663e-101	3.50926
c_01.csv	Pcdh9	2.48452e-105	-2.27277	0.772	0.953	6.58323e-101	1.23446
c_01.csv	Zbtb7c	3.62857e-103	0.884402	0.821	0.376	9.61461e-99	0.457978
c_01.csv	Asic2	4.22834e-103	1.2782	0.963	0.781	1.12038e-98	0.811007
c_01.csv	Gm15398	3.75882e-101	-1.33006	0.139	0.705	9.95974e-97	5.07194
c_01.csv	Mgat4c	8.48778e-101	0.823925	0.998	0.841	2.24901e-96	0.842685
c_01.csv	Tenm4	9.88124e-101	-1.53459	0.347	0.801	2.61823e-96	2.30836
c_01.csv	Grid2	9.60934e-100	1.06148	1	0.819	2.54619e-95	0.819
c_01.csv	Plxna4	2.38638e-98	0.721892	0.998	0.91	6.3232e-94	0.911824
c_01.csv	Calb2	2.05375e-97	0.773542	0.769	0.345	5.44182e-93	0.448635
c_01.csv	Cntn4	2.28173e-97	-2.1283	0.342	0.748	6.04591e-93	2.18713
c_01.csv	Ntm	5.03839e-96	-2.09867	0.494	0.833	1.33502e-91	1.68623
c_01.csv	Sntg2	6.46645e-95	0.364295	0.653	0.215	1.71341e-90	0.32925
c_01.csv	Robo1	4.6691e-94	0.861219	1	0.944	1.23717e-89	0.944
c_01.csv	Rai14	2.34627e-93	1.01221	0.61	0.242	6.2169e-89	0.396721
c_01.csv	Rgs6	4.89305e-93	-2.48218	0.323	0.735	1.29651e-88	2.27554
c_01.csv	Cntnap4	7.36036e-92	0.815841	0.998	0.894	1.95027e-87	0.895792
c_01.csv	Pamr1	2.15743e-90	0.378625	0.38	0.09	5.71655e-86	0.236842
c_01.csv	Clgn	5.18034e-90	0.953143	0.886	0.58	1.37263e-85	0.654628
c_01.csv	Kcnk13	1.50683e-89	0.564287	0.576	0.185	3.99265e-85	0.321181
c_01.csv	A330008L17Rik	3.14015e-89	-1.77405	0.144	0.644	8.32045e-85	4.47222
c_01.csv	Stxbp5l	6.19988e-88	0.809105	0.988	0.858	1.64278e-83	0.868421
c_01.csv	Lrrtm4	1.79147e-87	-2.16668	0.566	0.866	4.74686e-83	1.53004
c_01.csv	Tmtc1	1.06103e-86	0.767582	0.953	0.667	2.8114e-82	0.699895
c_01.csv	Neto2	1.13793e-86	-0.999346	0.132	0.647	3.01517e-82	4.90152
c_01.csv	Tmem26	3.56578e-85	0.403702	0.486	0.146	9.44824e-81	0.300412
c_01.csv	Stk32b	4.7671e-85	0.514266	0.548	0.192	1.26314e-80	0.350365
c_01.csv	Syt17	4.77375e-85	-1.10831	0.256	0.71	1.2649e-80	2.77344
c_01.csv	Lrtm1	8.44525e-85	0.65615	0.809	0.406	2.23774e-80	0.501854
c_01.csv	Ldlrad3	9.67411e-85	0.774962	0.851	0.522	2.56335e-80	0.613396
c_01.csv	Kcnc2	2.47167e-84	-1.44446	0.536	0.855	6.54918e-80	1.59515
c_01.csv	Unc5c	3.47203e-84	0.761198	1	0.943	9.19985e-80	0.943
c_01.csv	Stk39	8.34886e-84	0.678968	0.995	0.897	2.2122e-79	0.901508
c_01.csv	Slc2a13	3.28152e-83	0.737451	0.99	0.844	8.69504e-79	0.852525
c_01.csv	Frmd5	2.59387e-82	0.831627	0.963	0.682	6.87298e-78	0.708204
c_01.csv	Brinp1	3.55373e-82	-1.41589	0.429	0.779	9.41631e-78	1.81585
c_01.csv	Prkar2b	1.3421e-81	0.6889	0.871	0.558	3.55615e-77	0.640643
c_01.csv	Mob3b	3.88953e-81	-1.38634	0.099	0.584	1.03061e-76	5.89899
c_01.csv	Tmem163	1.21166e-80	0.751991	0.824	0.416	3.21053e-76	0.504854
c_01.csv	Nrxn3	4.0792e-80	0.560112	1	0.986	1.08086e-75	0.986
c_01.csv	Ntf3	7.55564e-80	0.724796	0.754	0.341	2.00202e-75	0.452255
c_01.csv	Opcml	1.20395e-79	-1.4866	0.782	0.946	3.1901e-75	1.20972
c_01.csv	Dpp6	4.34864e-79	-0.807695	0.998	0.987	1.15226e-74	0.988978
c_01.csv	Ttc28	5.41017e-79	-1.01238	0.556	0.849	1.43353e-74	1.52698
c_01.csv	Kcng3	6.92257e-79	0.481347	0.516	0.173	1.83427e-74	0.335271
c_01.csv	Lrrc7	1.29163e-78	0.49305	1	0.971	3.42243e-74	0.971
c_01.csv	Cdh7	1.53256e-77	0.683192	0.851	0.454	4.06083e-73	0.53349
c_01.csv	Lrmda	5.23543e-77	-1.44665	0.102	0.572	1.38723e-72	5.60784
c_01.csv	Pbx3	6.75603e-77	0.750941	0.998	0.886	1.79014e-72	0.887776
c_01.csv	Meis1	2.55936e-76	0.634293	0.496	0.172	6.78155e-72	0.346774
c_01.csv	Trpc6	3.60814e-76	-1.4314	0.298	0.688	9.56048e-72	2.30872
c_01.csv	Col25a1	4.07218e-76	-2.59655	0.218	0.639	1.07901e-71	2.93119
c_01.csv	Abca1	5.18233e-75	0.444892	0.489	0.168	1.37316e-70	0.343558
c_01.csv	Dab1	2.0029e-74	0.715015	1	0.956	5.30707e-70	0.956
c_01.csv	Gm28376	1.13366e-73	0.598489	0.665	0.283	3.00387e-69	0.425564
c_01.csv	Kank1	2.53452e-73	0.699086	0.454	0.154	6.71571e-69	0.339207
c_01.csv	Nckap5	2.88244e-73	0.836089	0.779	0.428	7.6376e-69	0.549422
c_01.csv	Ssbp2	1.60623e-72	0.681127	0.998	0.886	4.25603e-68	0.887776
c_01.csv	Fbxl7	9.04244e-71	0.787717	0.985	0.701	2.39598e-66	0.711675
c_01.csv	Mtus2	1.13977e-70	0.775729	0.908	0.66	3.02006e-66	0.726872
c_01.csv	Cadm1	2.50518e-70	-1.48926	0.732	0.885	6.63798e-66	1.20902
c_01.csv	Rph3a	4.02723e-70	0.759248	0.871	0.583	1.0671e-65	0.669346
c_01.csv	Gm30382	6.72311e-70	0.755152	0.846	0.48	1.78142e-65	0.567376
c_01.csv	Serpine2	7.61929e-70	-1.09449	0.089	0.541	2.01888e-65	6.07865
c_01.csv	Slc24a3	7.87688e-70	0.617205	1	0.951	2.08714e-65	0.951
c_01.csv	Adgrl2	7.25048e-69	0.713161	0.918	0.631	1.92116e-64	0.687364
c_01.csv	Ntng1	1.1492e-68	-2.28719	0.3	0.673	3.04503e-64	2.24333
c_01.csv	Lncbate1	6.76368e-68	0.565	0.7	0.351	1.79217e-63	0.501429
c_01.csv	Spon1	4.40066e-67	0.598889	0.754	0.386	1.16604e-62	0.511936
c_01.csv	Rbfox1	1.01734e-66	-2.76356	0.439	0.738	2.69565e-62	1.68109
c_01.csv	Hs6st3	1.70327e-66	-2.51313	0.236	0.631	4.51316e-62	2.67373
c_01.csv	Rreb1	1.95978e-66	-1.49374	0.404	0.697	5.19282e-62	1.72525
c_01.csv	Zeb1	5.46404e-66	0.601939	0.988	0.936	1.44781e-61	0.947368
c_01.csv	Pde10a	6.50039e-66	-1.05675	0.881	0.943	1.72241e-61	1.07037
c_01.csv	Samd5	6.64571e-66	-0.904096	0.136	0.576	1.76091e-61	4.23529
c_01.csv	Cntnap5a	1.98486e-65	-1.21762	0.767	0.9	5.25929e-61	1.1734
c_01.csv	Fam19a1	1.18421e-64	-2.26578	0.146	0.561	3.13781e-60	3.84247
c_01.csv	Tmtc2	2.84733e-64	-1.30761	0.253	0.648	7.54458e-60	2.56126
c_01.csv	Ripor2	4.14964e-64	-0.8412	0.122	0.557	1.09953e-59	4.56557
c_01.csv	Msh3	4.78621e-64	0.701307	0.901	0.673	1.2682e-59	0.746948
c_01.csv	Mef2a	5.28236e-64	0.547551	0.988	0.901	1.39967e-59	0.911943
c_01.csv	Prkg2	1.05471e-63	0.427372	0.593	0.249	2.79466e-59	0.419899
c_01.csv	Ccser1	1.54114e-62	-0.630163	0.998	0.985	4.08357e-58	0.986974
c_01.csv	Pou3f1	4.63719e-62	0.287791	0.333	0.094	1.22872e-57	0.282282
c_01.csv	Mpp6	9.05391e-62	-0.882932	0.295	0.659	2.39901e-57	2.2339
c_01.csv	Chrna6	1.47922e-61	-0.807443	0.112	0.534	3.91949e-57	4.76786
c_01.csv	Astn2	2.16575e-61	-1.24836	0.69	0.846	5.73859e-57	1.22609
c_01.csv	Ret	5.10137e-61	0.615657	0.99	0.773	1.35171e-56	0.780808
c_01.csv	Efna5	1.45688e-60	0.58209	0.978	0.772	3.86029e-56	0.789366
c_01.csv	Cpne8	2.14984e-60	-0.913931	0.144	0.569	5.69644e-56	3.95139
c_01.csv	Rmst	2.17688e-60	0.584348	0.963	0.518	5.76807e-56	0.537902
c_01.csv	Jph1	2.63514e-60	0.465528	0.561	0.236	6.98232e-56	0.420677
c_01.csv	Grin2b	3.10153e-60	0.40761	0.998	0.978	8.21813e-56	0.97996
c_01.csv	Frmpd3	4.08887e-60	-0.717848	0.136	0.565	1.08343e-55	4.15441
c_01.csv	Cit	9.45583e-60	-0.722658	0.72	0.883	2.50551e-55	1.22639
c_01.csv	Parm1	3.59313e-59	-0.781819	0.082	0.511	9.52072e-55	6.23171
c_01.csv	Kcnb2	4.29253e-59	-0.920195	0.921	0.938	1.13739e-54	1.01846
c_01.csv	Plxnc1	8.26373e-59	0.541412	0.844	0.505	2.18964e-54	0.598341
c_01.csv	Tmem200a	1.1068e-58	0.572958	0.846	0.516	2.93268e-54	0.609929
c_01.csv	Cacng3	2.79649e-58	0.589616	0.883	0.587	7.40986e-54	0.664779
c_01.csv	Sphkap	9.09709e-58	0.801621	0.94	0.783	2.41046e-53	0.832979
c_01.csv	Pdzd2	1.08535e-57	0.454214	0.66	0.329	2.87584e-53	0.498485
c_01.csv	Dgkz	1.44131e-57	-0.716494	0.243	0.62	3.81905e-53	2.55144
c_01.csv	Ammecr1	1.90774e-57	0.613006	0.968	0.826	5.05495e-53	0.853306
c_01.csv	Fam114a1	2.45276e-57	0.329246	0.345	0.104	6.49909e-53	0.301449
c_01.csv	Epha3	3.92623e-57	0.729538	0.811	0.516	1.04033e-52	0.636252
c_01.csv	Chrnb3	6.25225e-57	-0.929922	0.218	0.591	1.65666e-52	2.71101
c_01.csv	Gm48003	7.3378e-57	0.443969	0.593	0.268	1.9443e-52	0.451939
c_01.csv	Fjx1	8.82167e-57	0.355239	0.424	0.151	2.33748e-52	0.356132
c_01.csv	Adarb2	2.52439e-56	0.703556	0.998	0.867	6.68887e-52	0.868737
c_01.csv	Pde8b	9.23226e-56	0.570629	0.918	0.571	2.44627e-51	0.622004
c_01.csv	Etl4	1.07368e-55	0.406307	0.985	0.804	2.84494e-51	0.816244
c_01.csv	Cdh22	1.48909e-55	0.574044	0.727	0.416	3.94565e-51	0.572215
c_01.csv	Pde5a	2.19292e-55	0.287013	0.31	0.089	5.81058e-51	0.287097
c_01.csv	Snx29	3.7327e-55	0.521252	0.963	0.841	9.89054e-51	0.873313
c_01.csv	Sntg1	1.19379e-54	-0.655711	0.973	0.972	3.16318e-50	0.998972
c_01.csv	Cdh18	1.49838e-54	0.539897	1	0.942	3.97027e-50	0.942
c_01.csv	Cobl	2.29726e-54	0.589596	0.888	0.616	6.08705e-50	0.693694
c_01.csv	Pcdh17	1.11154e-53	0.645118	0.886	0.562	2.94524e-49	0.634312
c_01.csv	Cpq	1.23645e-53	-1.13289	0.457	0.722	3.27622e-49	1.57987
c_01.csv	Galnt17	1.47974e-53	-0.960423	0.189	0.562	3.92087e-49	2.97354
c_01.csv	Bnc2	1.58109e-53	0.646898	0.99	0.652	4.18942e-49	0.658586
c_01.csv	Tab3	1.65926e-53	0.560113	0.66	0.39	4.39654e-49	0.590909
c_01.csv	Zfp385b	2.09999e-53	-1.17467	0.149	0.522	5.56434e-49	3.50336
c_01.csv	Dlgap2	2.17496e-53	-1.16592	0.68	0.817	5.763e-49	1.20147
c_01.csv	Gucy1a1	2.53262e-53	0.275738	0.37	0.122	6.71069e-49	0.32973
c_01.csv	9030622O22Rik	2.9006e-53	0.699213	0.926	0.621	7.68571e-49	0.670626
c_01.csv	Ptprz1	3.45544e-53	0.584186	0.995	0.848	9.15587e-49	0.852261
c_01.csv	Foxp2	7.64871e-53	0.594905	0.998	0.813	2.02668e-48	0.814629
c_01.csv	Gm11418	1.49628e-52	0.312651	0.439	0.158	3.96469e-48	0.359909
c_01.csv	Ndst4	1.85301e-52	0.526708	0.625	0.302	4.90991e-48	0.4832
c_01.csv	Zmat4	3.61901e-52	-0.879797	0.132	0.504	9.58929e-48	3.81818
c_01.csv	Hdac9	1.36862e-51	-1.07003	0.975	0.96	3.62643e-47	0.984615
c_01.csv	Hipk2	3.23784e-51	-0.735044	0.648	0.827	8.5793e-47	1.27623
c_01.csv	5530401A14Rik	6.1765e-51	0.2996	0.385	0.131	1.63659e-46	0.34026
c_01.csv	St6gal2	7.69022e-51	0.564485	0.864	0.561	2.03768e-46	0.649306
c_01.csv	Klf12	7.79965e-51	-0.901515	0.546	0.815	2.06667e-46	1.49267
c_01.csv	Pdzrn4	9.7536e-51	0.451425	0.995	0.923	2.58441e-46	0.927638
c_01.csv	Elavl2	1.18262e-50	-0.903862	0.943	0.925	3.1336e-46	0.980912
c_01.csv	Crim1	1.28014e-50	0.562813	0.873	0.573	3.392e-46	0.656357
c_01.csv	Rnf152	1.33276e-50	0.492037	0.737	0.416	3.53142e-46	0.56445
c_01.csv	Tmem150c	1.37745e-50	0.540255	0.876	0.665	3.64984e-46	0.759132
c_01.csv	Mcu	1.48579e-50	0.568569	0.911	0.744	3.93689e-46	0.816685
c_01.csv	Tmem117	1.64347e-50	-0.785392	0.831	0.887	4.35469e-46	1.06739
c_01.csv	Syn2	4.42733e-50	0.504046	0.921	0.622	1.17311e-45	0.675353
c_01.csv	Cntn5	5.90276e-50	-2.12524	0.524	0.744	1.56406e-45	1.41985
c_01.csv	Gm15577	1.0758e-49	0.364786	0.476	0.195	2.85055e-45	0.409664
c_01.csv	Nwd2	4.28342e-49	-1.43106	0.538	0.747	1.13498e-44	1.38848
c_01.csv	Ryr3	4.41646e-49	0.625544	0.995	0.844	1.17023e-44	0.848241
c_01.csv	D030068K23Rik	6.03205e-49	-0.670845	0.025	0.396	1.59831e-44	15.84
c_01.csv	Nrg1	6.54664e-49	0.645014	1	0.939	1.73466e-44	0.939
c_01.csv	Dlk1	8.12319e-49	0.60079	0.963	0.728	2.1524e-44	0.755971
c_01.csv	Tmeff1	1.57576e-48	-0.530708	0.104	0.488	4.17528e-44	4.69231
c_01.csv	Ptprd	1.72884e-48	-1.25127	0.973	0.976	4.5809e-44	1.00308
c_01.csv	Cntn6	2.54324e-48	-0.879428	0.392	0.674	6.73881e-44	1.71939
c_01.csv	Cdh6	4.407e-48	0.496099	0.553	0.26	1.16772e-43	0.470163
c_01.csv	Cpne4	5.26886e-48	-1.04243	0.697	0.861	1.39609e-43	1.23529
c_01.csv	Adgrl3	8.96465e-48	0.352261	1	0.978	2.37536e-43	0.978
c_01.csv	B3galt1	8.98121e-48	0.485887	1	0.98	2.37975e-43	0.98
c_01.csv	Ebf1	1.69665e-47	-1.48376	0.062	0.422	4.49561e-43	6.80645
c_01.csv	Bach2	2.78391e-47	-0.741762	0.715	0.863	7.37652e-43	1.20699
c_01.csv	Macrod2	2.81749e-47	0.444753	1	0.988	7.4655e-43	0.988
c_01.csv	Gfra1	8.77728e-47	0.453395	0.975	0.581	2.32572e-42	0.595897
c_01.csv	Epha7	1.5833e-46	-0.724566	0.181	0.53	4.19527e-42	2.92818
c_01.csv	Gm48006	1.64088e-46	0.254204	0.342	0.119	4.34784e-42	0.347953
c_01.csv	Cadps	2.24661e-46	-0.514059	0.995	0.98	5.95285e-42	0.984925
c_01.csv	Asap2	2.26107e-46	0.506553	0.881	0.655	5.99116e-42	0.743473
c_01.csv	Csmd3	3.44498e-46	0.39719	0.998	0.977	9.12816e-42	0.978958
c_01.csv	Esd	3.64231e-46	0.488941	0.573	0.303	9.65102e-42	0.528796
c_01.csv	Fam196a	8.4982e-46	0.306914	0.452	0.183	2.25177e-41	0.404867
c_01.csv	Frmd4a	1.5755e-45	-0.391915	0.998	0.986	4.17461e-41	0.987976
c_01.csv	Fgf14	2.05733e-45	0.343907	1	0.991	5.4513e-41	0.991
c_01.csv	Adamts6	3.07445e-45	-0.887789	0.33	0.613	8.14636e-41	1.85758
c_01.csv	Zfp462	5.01171e-45	0.492221	0.978	0.857	1.32795e-40	0.876278
c_01.csv	Col11a1	5.68733e-45	-1.05012	0.03	0.375	1.50697e-40	12.5
c_01.csv	Tcf4	6.932e-45	-1.15774	0.665	0.815	1.83677e-40	1.22556
c_01.csv	Epha5	8.07784e-45	-0.784282	0.975	0.95	2.14039e-40	0.974359
c_01.csv	Lhfp	9.46489e-45	0.681255	0.769	0.504	2.50791e-40	0.655397
c_01.csv	Apba1	1.92282e-44	0.494395	1	0.973	5.0949e-40	0.973
c_01.csv	Cdh20	1.92769e-44	0.607461	0.876	0.596	5.1078e-40	0.680365
c_01.csv	Map3k5	2.02657e-44	-0.564091	0.206	0.555	5.36981e-40	2.69417
c_01.csv	Ncald	7.76193e-44	-0.75786	0.581	0.801	2.05668e-39	1.37866
c_01.csv	Zdhhc14	8.55683e-44	-0.66548	0.424	0.713	2.2673e-39	1.6816
c_01.csv	Epha4	1.45979e-43	-0.96324	0.246	0.552	3.86801e-39	2.2439
c_01.csv	Kcnn2	1.79405e-43	0.523799	0.94	0.782	4.75368e-39	0.831915
c_01.csv	Tle3	1.9527e-43	0.329863	0.499	0.23	5.17407e-39	0.460922
c_01.csv	Focad	2.63176e-43	0.496377	0.97	0.864	6.97338e-39	0.890722
c_01.csv	Fbxl17	5.94159e-43	0.388296	0.995	0.968	1.57434e-38	0.972864
c_01.csv	Dok5	1.25632e-42	-0.509123	0.139	0.481	3.32888e-38	3.46043
c_01.csv	St6gal1	2.25325e-42	0.488715	0.61	0.337	5.97042e-38	0.552459
c_01.csv	Chst8	5.44784e-42	0.381593	0.576	0.286	1.44351e-37	0.496528
c_01.csv	Gabrb1	7.42761e-42	-0.711509	0.963	0.969	1.96809e-37	1.00623
c_01.csv	Maml2	7.80074e-42	-0.760469	0.203	0.541	2.06696e-37	2.66502
c_01.csv	Kcnip3	8.91045e-42	-0.600906	0.201	0.528	2.361e-37	2.62687
c_01.csv	Aff2	9.79023e-42	-0.905594	0.447	0.697	2.59412e-37	1.55928
c_01.csv	Gsdme	1.28149e-41	-0.751841	0.504	0.718	3.39557e-37	1.4246
c_01.csv	Tnrc18	2.08686e-41	0.477202	0.888	0.704	5.52954e-37	0.792793
c_01.csv	Grm1	2.51101e-41	0.527758	0.913	0.625	6.65342e-37	0.684556
c_01.csv	Cachd1	2.54157e-41	0.455609	0.896	0.644	6.7344e-37	0.71875
c_01.csv	Kcns3	3.84358e-41	-0.830342	0.124	0.442	1.01843e-36	3.56452
c_01.csv	Gm26573	9.14471e-41	0.424597	0.623	0.352	2.42307e-36	0.565008
c_01.csv	Whrn	1.3351e-40	0.491205	0.824	0.605	3.53762e-36	0.734223
c_01.csv	Lypd1	1.41087e-40	0.420494	0.568	0.286	3.73837e-36	0.503521
c_01.csv	Fgf13	1.45574e-40	-0.863949	0.744	0.849	3.85728e-36	1.14113
c_01.csv	Nav3	1.46938e-40	-1.31727	0.851	0.901	3.89342e-36	1.05875
c_01.csv	Gm45881	2.12624e-40	0.500576	0.973	0.853	5.63391e-36	0.87667
c_01.csv	Adamts2	2.63506e-40	0.25965	0.533	0.233	6.98212e-36	0.437148
c_01.csv	Nectin3	5.55965e-40	-0.543136	0.084	0.412	1.47314e-35	4.90476
c_01.csv	Kcnab1	5.82032e-40	-1.4558	0.221	0.508	1.54221e-35	2.29864
c_01.csv	Cnpy1	5.91389e-40	0.413266	0.804	0.532	1.567e-35	0.661692
c_01.csv	Sema6a	1.12983e-39	-0.680318	0.045	0.364	2.99372e-35	8.08889
c_01.csv	Cdh10	1.24395e-39	0.690215	0.923	0.833	3.29609e-35	0.902492
c_01.csv	Fam196b	1.30778e-39	-0.639981	0.261	0.574	3.46522e-35	2.19923
c_01.csv	Trio	1.8407e-39	0.397237	0.985	0.938	4.87729e-35	0.952284
c_01.csv	Gphn	2.49688e-39	0.315308	1	0.991	6.61597e-35	0.991
c_01.csv	Lmo4	6.26653e-39	-0.629039	0.241	0.54	1.66044e-34	2.24066
c_01.csv	Cpne2	6.34017e-39	-0.437097	0.032	0.35	1.67996e-34	10.9375
c_01.csv	Plppr1	6.38784e-39	0.466767	0.911	0.714	1.69259e-34	0.783754
c_01.csv	Tmem178b	6.93315e-39	0.332816	1	0.985	1.83708e-34	0.985
c_01.csv	Snca	7.70955e-39	-0.782395	0.777	0.835	2.0428e-34	1.07465
c_01.csv	Dtna	8.13981e-39	0.431553	0.973	0.859	2.15681e-34	0.882837
c_01.csv	Gm26848	1.17644e-38	-0.559671	0.998	0.989	3.1172e-34	0.990982
c_01.csv	Rbfox3	1.89079e-38	0.408747	0.945	0.856	5.01003e-34	0.90582
c_01.csv	St6galnac3	2.10503e-38	0.484907	0.955	0.826	5.57771e-34	0.864921
c_01.csv	Dock1	2.30633e-38	0.259904	0.496	0.228	6.11107e-34	0.459677
c_01.csv	Ndrg1	5.44389e-38	0.274403	0.33	0.125	1.44247e-33	0.378788
c_01.csv	Thrb	7.61914e-38	-1.08485	0.444	0.676	2.01884e-33	1.52252
c_01.csv	Lig1	1.12243e-37	0.278853	0.439	0.193	2.9741e-33	0.439636
c_01.csv	Gpr26	1.40937e-37	0.413969	0.667	0.401	3.73439e-33	0.601199
c_01.csv	Sash1	1.53618e-37	-0.514013	0.102	0.416	4.07042e-33	4.07843
c_01.csv	Pde1a	2.23334e-37	0.510474	0.975	0.818	5.91769e-33	0.838974
c_01.csv	Erc2	3.57794e-37	-0.696388	1	0.99	9.48047e-33	0.99
c_01.csv	Dgkb	6.3463e-37	-0.800821	0.945	0.95	1.68158e-32	1.00529
c_01.csv	Dscaml1	6.74649e-37	-0.832264	0.027	0.326	1.78762e-32	12.0741
c_01.csv	Plxdc2	7.80827e-37	-1.0934	0.104	0.412	2.06896e-32	3.96154
c_01.csv	Gm13919	1.24465e-36	0.302432	0.469	0.221	3.29795e-32	0.471215
c_01.csv	Dync1i1	1.40021e-36	-0.466298	0.96	0.955	3.71014e-32	0.994792
c_01.csv	Eda	2.68912e-36	-0.709568	0.151	0.462	7.12535e-32	3.0596
c_01.csv	Elavl4	2.87775e-36	-0.657086	0.911	0.906	7.62517e-32	0.994512
c_01.csv	Alcam	4.97126e-36	-1.0625	0.439	0.709	1.31723e-31	1.61503
c_01.csv	9530026P05Rik	6.22093e-36	-1.02618	0.025	0.316	1.64836e-31	12.64
c_01.csv	Cacna1e	9.88527e-36	-0.475418	0.998	0.957	2.6193e-31	0.958918
c_01.csv	Palm2	1.29791e-35	-0.591155	0.541	0.755	3.43908e-31	1.39556
c_01.csv	Tmem132b	1.88955e-35	0.453766	0.965	0.852	5.00675e-31	0.882902
c_01.csv	C79798	2.01362e-35	0.415784	0.762	0.505	5.33548e-31	0.66273
c_01.csv	Hlf	3.02008e-35	0.387981	0.613	0.347	8.00231e-31	0.566069
c_01.csv	Alk	4.59144e-35	-1.01217	0.199	0.485	1.21659e-30	2.43719
c_01.csv	Lsamp	7.97296e-35	0.299378	1	0.997	2.11259e-30	0.997
c_01.csv	Nrip3	1.08422e-34	-0.46088	0.139	0.439	2.87286e-30	3.15827
c_01.csv	Nrcam	1.76277e-34	-0.519083	0.923	0.934	4.67081e-30	1.01192
c_01.csv	Prkd1	1.80458e-34	-0.55821	0.092	0.386	4.7816e-30	4.19565
c_01.csv	Erbb4	2.16249e-34	0.425906	1	0.903	5.72995e-30	0.903
c_01.csv	Tmem132d	2.6845e-34	-0.919352	0.055	0.339	7.11311e-30	6.16364
c_01.csv	Jam2	6.03613e-34	0.283157	0.342	0.142	1.59939e-29	0.415205
c_01.csv	Kcnma1	8.02695e-34	0.264584	1	0.984	2.1269e-29	0.984
c_01.csv	Dchs2	1.04317e-33	0.337217	0.598	0.328	2.76408e-29	0.548495
c_01.csv	Kcnj3	1.44674e-33	0.342267	0.876	0.57	3.83344e-29	0.650685
c_01.csv	Agbl4	2.00252e-33	-0.408806	0.998	0.98	5.30608e-29	0.981964
c_01.csv	Garem1	4.09779e-33	-0.533142	0.34	0.602	1.08579e-28	1.77059
c_01.csv	Cplx1	4.78131e-33	-0.777732	0.496	0.666	1.2669e-28	1.34274
c_01.csv	Arhgap22	5.0222e-33	-0.381524	0.077	0.363	1.33073e-28	4.71429
c_01.csv	Tmem255a	1.05122e-32	0.431366	0.878	0.689	2.78543e-28	0.784738
c_01.csv	Ntsr1	1.28965e-32	0.388996	0.767	0.51	3.41718e-28	0.664928
c_01.csv	Wasf3	1.29074e-32	0.365237	0.935	0.781	3.42008e-28	0.835294
c_01.csv	Qk	1.52064e-32	-0.841622	0.6	0.743	4.02925e-28	1.23833
c_01.csv	Prima1	1.7469e-32	-0.53734	0.179	0.449	4.62875e-28	2.50838
c_01.csv	Kcnk10	2.43281e-32	-0.470365	0.176	0.466	6.44621e-28	2.64773
c_01.csv	Gnb4	4.2278e-32	-0.421035	0.045	0.323	1.12024e-27	7.17778
c_01.csv	Diaph1	6.13612e-32	0.446308	0.792	0.607	1.62589e-27	0.766414
c_01.csv	Kirrel	7.28124e-32	0.341653	0.553	0.302	1.92931e-27	0.546112
c_01.csv	Vwc2	7.38425e-32	-0.561161	0.045	0.318	1.9566e-27	7.06667
c_01.csv	Zfp804b	1.67393e-31	-1.74774	0.159	0.419	4.43543e-27	2.63522
c_01.csv	Slit2	1.81057e-31	-0.825508	0.553	0.736	4.79746e-27	1.33092
c_01.csv	2010300C02Rik	1.94595e-31	-0.409169	0.084	0.364	5.15618e-27	4.33333
c_01.csv	Clip1	2.16749e-31	-0.436045	0.764	0.857	5.7432e-27	1.12173
c_01.csv	Gm26624	3.08796e-31	0.384721	0.67	0.444	8.18216e-27	0.662687
c_01.csv	Pex5l	3.17883e-31	0.374341	0.99	0.812	8.42294e-27	0.820202
c_01.csv	Bicdl1	3.42443e-31	-0.447277	0.605	0.789	9.07371e-27	1.30413
c_01.csv	Cntn3	4.42017e-31	-1.02702	0.122	0.386	1.17121e-26	3.16393
c_01.csv	Ctnna1	5.04533e-31	-0.746551	0.476	0.665	1.33686e-26	1.39706
c_01.csv	Clstn2	5.8237e-31	-1.05264	0.968	0.913	1.54311e-26	0.943182
c_01.csv	Sema5a	6.96043e-31	-0.61942	0.104	0.385	1.8443e-26	3.70192
c_01.csv	Slc23a2	7.75977e-31	-0.51107	0.687	0.801	2.05611e-26	1.16594
c_01.csv	Frmd4b	8.8809e-31	-0.993816	0.794	0.785	2.35317e-26	0.988665
c_01.csv	Dner	9.40009e-31	0.382815	0.97	0.902	2.49074e-26	0.929897
c_01.csv	Ext1	1.3298e-30	-0.75906	0.829	0.881	3.52356e-26	1.06273
c_01.csv	Sema6d	1.47974e-30	0.418364	1	0.925	3.92087e-26	0.925
c_01.csv	Mad1l1	1.8097e-30	-0.764743	0.72	0.828	4.79515e-26	1.15
c_01.csv	Kcnh5	2.11324e-30	-0.706068	0.057	0.32	5.59944e-26	5.61404
c_01.csv	C130026L21Rik	2.80477e-30	0.306613	0.481	0.258	7.43181e-26	0.536383
c_01.csv	Lhfpl3	3.11527e-30	0.291027	0.993	0.891	8.25454e-26	0.897281
c_01.csv	Gucy2c	6.69393e-30	0.341733	0.667	0.406	1.77369e-25	0.608696
c_01.csv	Egfem1	6.91978e-30	-1.26093	0.253	0.507	1.83353e-25	2.00395
c_01.csv	Rgma	1.01943e-29	-0.338463	0.057	0.327	2.70119e-25	5.73684
c_01.csv	Gm48749	1.70137e-29	-0.364268	0.06	0.325	4.50812e-25	5.41667
c_01.csv	Sept3	1.97787e-29	0.363131	0.816	0.629	5.24075e-25	0.770833
c_01.csv	L3mbtl4	3.16997e-29	-0.561085	0.077	0.339	8.39946e-25	4.4026
c_01.csv	Rit2	3.5502e-29	0.342804	0.995	0.964	9.40697e-25	0.968844
c_01.csv	Pvt1	3.56953e-29	-0.473339	0.395	0.68	9.45818e-25	1.72152
c_01.csv	Htr2c	3.96382e-29	-1.5874	0.141	0.394	1.05029e-24	2.79433
c_01.csv	Adamtsl1	3.98498e-29	-1.36315	0.536	0.681	1.0559e-24	1.27052
c_01.csv	Cacna1g	4.14096e-29	0.343219	0.777	0.557	1.09723e-24	0.71686
c_01.csv	Nexmif	6.11324e-29	0.39842	0.973	0.86	1.61983e-24	0.883864
c_01.csv	Tnrc6c	6.39171e-29	0.324209	0.99	0.952	1.69361e-24	0.961616
c_01.csv	Car11	7.84183e-29	0.351965	0.603	0.383	2.07785e-24	0.635158
c_01.csv	Pitpnm3	1.0718e-28	-0.472198	0.372	0.611	2.83996e-24	1.64247
c_01.csv	Gap43	1.2261e-28	0.314394	0.988	0.946	3.24878e-24	0.95749
c_01.csv	Srgap1	1.38461e-28	0.374512	0.973	0.858	3.66881e-24	0.881809
c_01.csv	Cd46	1.78435e-28	0.401968	0.819	0.64	4.72798e-24	0.781441
c_01.csv	Mitf	1.80746e-28	-0.443391	0.194	0.465	4.78924e-24	2.39691
c_01.csv	Sez6l	2.62083e-28	0.349249	0.983	0.906	6.94441e-24	0.921668
c_01.csv	Mctp1	4.46504e-28	0.568176	0.94	0.797	1.1831e-23	0.847872
c_01.csv	Tenm3	4.87006e-28	-0.984418	0.4	0.631	1.29042e-23	1.5775
c_01.csv	Fam155a	5.08131e-28	-0.379259	1	0.992	1.3464e-23	0.992
c_01.csv	A330015K06Rik	6.44516e-28	-0.695725	0.079	0.329	1.70777e-23	4.16456
c_01.csv	9630028H03Rik	7.42441e-28	0.390847	0.734	0.519	1.96725e-23	0.707084
c_01.csv	Nell1	8.03416e-28	-0.948517	0.203	0.457	2.12881e-23	2.25123
c_01.csv	A230057D06Rik	9.52791e-28	-0.342539	0.993	0.982	2.52461e-23	0.988922
c_01.csv	Grin3a	1.14385e-27	-0.740071	0.303	0.564	3.03085e-23	1.86139
c_01.csv	Ebf4	1.18136e-27	-0.298018	0.062	0.318	3.13026e-23	5.12903
c_01.csv	Fam13a	1.18493e-27	-0.403605	0.149	0.416	3.1397e-23	2.79195
c_01.csv	Rapgef5	2.53566e-27	0.361558	0.96	0.789	6.71874e-23	0.821875
c_01.csv	Tmem164	2.54502e-27	-0.515252	0.526	0.72	6.74354e-23	1.36882
c_01.csv	Bclaf3	2.85604e-27	-0.450974	0.397	0.633	7.56765e-23	1.59446
c_01.csv	Mllt3	3.22735e-27	0.357109	0.96	0.878	8.5515e-23	0.914583
c_01.csv	Pde11a	3.32405e-27	-0.678194	0.069	0.316	8.80773e-23	4.57971
c_01.csv	Aldh1a1	3.77367e-27	-1.17992	0.114	0.356	9.9991e-23	3.12281
c_01.csv	Ddc	3.96371e-27	0.42367	0.998	0.874	1.05026e-22	0.875752
c_01.csv	Cacna1d	4.30502e-27	-0.38914	0.965	0.954	1.1407e-22	0.988601
c_01.csv	Igf1r	5.59537e-27	-0.521682	0.608	0.767	1.4826e-22	1.26151
c_01.csv	Atxn1	6.45463e-27	0.301821	1	0.966	1.71028e-22	0.966
c_01.csv	Pou6f2	8.07801e-27	0.255226	0.457	0.234	2.14043e-22	0.512035
c_01.csv	Pcsk6	9.03239e-27	-0.449314	0.012	0.243	2.39331e-22	20.25
c_01.csv	Man1a2	1.40939e-26	0.405769	0.903	0.791	3.73445e-22	0.875969
c_01.csv	St6galnac5	1.55077e-26	-0.716249	0.499	0.673	4.10906e-22	1.3487
c_01.csv	Pds5b	2.17408e-26	0.341994	0.876	0.71	5.76065e-22	0.810502
c_01.csv	Ctnna2	2.43105e-26	-0.417712	1	0.988	6.44156e-22	0.988
c_01.csv	Pbx1	3.20998e-26	0.379372	1	0.984	8.5055e-22	0.984
c_01.csv	Vav2	3.55084e-26	-0.285961	0.025	0.257	9.40865e-22	10.28
c_01.csv	Nrg3	5.65069e-26	0.2839	1	0.987	1.49726e-21	0.987
c_01.csv	Cd47	5.7159e-26	-0.463605	0.571	0.736	1.51454e-21	1.28897
c_01.csv	P3h2	6.09226e-26	-0.381535	0.107	0.362	1.61427e-21	3.38318
c_01.csv	Tln2	6.18193e-26	0.376402	0.923	0.779	1.63803e-21	0.843987
c_01.csv	Golim4	6.39727e-26	0.400365	0.496	0.281	1.69508e-21	0.566532
c_01.csv	Rasgrf2	6.50394e-26	0.346656	0.968	0.847	1.72335e-21	0.875
c_01.csv	Igsf21	7.14176e-26	-0.418666	0.194	0.439	1.89235e-21	2.26289
c_01.csv	Lyst	9.65568e-26	0.450048	0.886	0.808	2.55846e-21	0.911964
c_01.csv	Fmnl2	9.76576e-26	0.33942	0.97	0.886	2.58763e-21	0.913402
c_01.csv	Nkain3	1.30331e-25	0.339036	0.94	0.773	3.45337e-21	0.82234
c_01.csv	Dok6	1.33609e-25	0.377326	0.993	0.953	3.54024e-21	0.959718
c_01.csv	Gpr63	1.61885e-25	0.319193	0.476	0.275	4.28946e-21	0.577731
c_01.csv	Rps6ka3	1.79569e-25	-0.553635	0.7	0.811	4.75804e-21	1.15857
c_01.csv	Camk2n1	2.133e-25	0.334632	0.787	0.599	5.6518e-21	0.761118
c_01.csv	D130043K22Rik	2.45304e-25	-0.421598	0.464	0.674	6.49983e-21	1.45259
c_01.csv	App	2.60161e-25	-0.352764	0.998	0.984	6.89349e-21	0.985972
c_01.csv	Nrp1	2.9785e-25	-0.634406	0.032	0.258	7.89214e-21	8.0625
c_01.csv	Cacnb2	3.01666e-25	-0.395047	0.995	0.975	7.99324e-21	0.979899
c_01.csv	Lin28b	3.25516e-25	0.390594	0.809	0.63	8.6252e-21	0.778739
c_01.csv	Nedd4l	3.26096e-25	0.310192	0.993	0.933	8.64058e-21	0.939577
c_01.csv	Mir9-3hg	3.79314e-25	-0.338223	0.03	0.259	1.00507e-20	8.63333
c_01.csv	Lingo1	4.08047e-25	0.34858	0.816	0.637	1.0812e-20	0.780637
c_01.csv	Gm2415	8.25414e-25	0.264032	0.402	0.211	2.1871e-20	0.524876
c_01.csv	Mtus1	8.65451e-25	0.275977	0.707	0.489	2.29319e-20	0.691655
c_01.csv	Robo2	8.83687e-25	0.335538	0.998	0.918	2.34151e-20	0.91984
c_01.csv	Fut9	9.18266e-25	0.350151	0.873	0.695	2.43313e-20	0.796105
c_01.csv	Zfp608	9.6575e-25	-0.491863	0.526	0.715	2.55895e-20	1.35932
c_01.csv	Dgkg	1.07597e-24	-0.566385	0.119	0.359	2.85099e-20	3.01681
c_01.csv	Pcsk1	1.212e-24	-0.413164	0.166	0.424	3.21145e-20	2.55422
c_01.csv	Gabra3	1.34705e-24	0.35351	0.859	0.705	3.56927e-20	0.820722
c_01.csv	Frem1	1.46661e-24	0.295155	0.543	0.323	3.88609e-20	0.594843
c_01.csv	Mroh1	1.68066e-24	-0.359912	0.283	0.529	4.45324e-20	1.86926
c_01.csv	Ppm1h	2.23397e-24	-0.449255	0.732	0.836	5.91934e-20	1.14208
c_01.csv	Pam	2.8502e-24	-0.480379	0.98	0.966	7.55217e-20	0.985714
c_01.csv	Tead1	3.25556e-24	-0.546061	0.201	0.444	8.62626e-20	2.20896
c_01.csv	C130071C03Rik	3.51126e-24	-0.544147	0.605	0.725	9.30378e-20	1.19835
c_01.csv	Ppfibp1	3.67619e-24	-0.339425	0.082	0.32	9.74081e-20	3.90244
c_01.csv	E130308A19Rik	5.42503e-24	-0.440342	0.633	0.77	1.43747e-19	1.21643
c_01.csv	Tle1	7.39795e-24	-0.368817	0.251	0.494	1.96023e-19	1.96813
c_01.csv	D430041D05Rik	7.50961e-24	0.366574	0.938	0.829	1.98982e-19	0.883795
c_01.csv	Man2a1	8.26996e-24	-0.448904	0.228	0.463	2.19129e-19	2.0307
c_01.csv	Gch1	1.06465e-23	0.351683	0.509	0.311	2.82101e-19	0.611002
c_01.csv	Dmd	1.17581e-23	-0.502368	1	0.977	3.11556e-19	0.977
c_01.csv	Ptprt	1.59774e-23	-1.25278	0.161	0.382	4.23354e-19	2.37267
c_01.csv	Herc3	1.65284e-23	-0.387076	0.457	0.674	4.37953e-19	1.47484
c_01.csv	March11	1.68834e-23	-0.531237	0.4	0.599	4.47358e-19	1.4975
c_01.csv	Ftx	2.12223e-23	0.306698	0.978	0.932	5.62327e-19	0.952965
c_01.csv	Oprk1	2.22288e-23	0.259574	0.762	0.523	5.88997e-19	0.686352
c_01.csv	Gpr137c	3.08253e-23	0.350868	0.854	0.655	8.16778e-19	0.766979
c_01.csv	Ankfn1	3.1019e-23	0.74591	0.643	0.462	8.21911e-19	0.718507
c_01.csv	Gria4	3.24219e-23	-0.453853	0.99	0.979	8.59082e-19	0.988889
c_01.csv	Agpat4	3.29446e-23	-0.470764	0.66	0.774	8.72934e-19	1.17273
c_01.csv	Prkce	3.7673e-23	-0.413835	0.94	0.944	9.98222e-19	1.00426
c_01.csv	Plce1	4.67788e-23	-0.423634	0.082	0.306	1.2395e-18	3.73171
c_01.csv	Mylip	4.8138e-23	0.367323	0.467	0.282	1.27551e-18	0.603854
c_01.csv	C230014O12Rik	5.12432e-23	-0.307322	0.109	0.353	1.35779e-18	3.23853
c_01.csv	Ubr4	6.09978e-23	-0.508818	0.665	0.758	1.61626e-18	1.13985
c_01.csv	Adam23	6.6354e-23	-0.420172	0.844	0.889	1.75818e-18	1.05332
c_01.csv	Il1rap	6.76355e-23	-0.593463	0.655	0.755	1.79214e-18	1.15267
c_01.csv	CT025619.1	7.11706e-23	0.322198	0.985	0.924	1.88581e-18	0.938071
c_01.csv	Dpy19l1	1.12347e-22	-0.300867	0.077	0.301	2.97687e-18	3.90909
c_01.csv	Pantr1	1.14381e-22	-0.319649	0.122	0.356	3.03075e-18	2.91803
c_01.csv	Palmd	1.21537e-22	-0.456432	0.251	0.476	3.22037e-18	1.89641
c_01.csv	Catspere2	1.32944e-22	-0.423164	0.692	0.806	3.52262e-18	1.16474
c_01.csv	Snx30	1.33627e-22	-0.402902	0.484	0.665	3.54071e-18	1.37397
c_01.csv	Plxna4os3	1.36318e-22	0.287845	0.563	0.36	3.61202e-18	0.639432
c_01.csv	Lin7a	1.57456e-22	-0.504935	0.529	0.697	4.17212e-18	1.31758
c_01.csv	Kcnn3	1.67791e-22	-0.646983	0.849	0.812	4.44595e-18	0.956419
c_01.csv	Cyyr1	1.85482e-22	-0.382144	0.02	0.223	4.91473e-18	11.15
c_01.csv	Fam189a1	2.04134e-22	-0.532572	0.821	0.866	5.40894e-18	1.05481
c_01.csv	Alms1	2.09013e-22	0.309049	0.772	0.602	5.5382e-18	0.779793
c_01.csv	Lysmd4	2.44549e-22	0.309467	0.849	0.703	6.4798e-18	0.828033
c_01.csv	A430090L17Rik	2.48514e-22	0.267134	0.372	0.198	6.58489e-18	0.532258
c_01.csv	Plcg2	2.6515e-22	-0.272082	0.057	0.277	7.02567e-18	4.85965
c_01.csv	Mpp7	2.71127e-22	-0.435391	0.447	0.625	7.18406e-18	1.39821
c_01.csv	Trps1	3.01412e-22	0.327672	0.923	0.795	7.98651e-18	0.861322
c_01.csv	Edil3	3.599e-22	-1.27131	0.159	0.37	9.53626e-18	2.32704
c_01.csv	Sncaip	3.65109e-22	0.346137	0.931	0.729	9.67431e-18	0.783029
c_01.csv	Slc39a12	4.09911e-22	-0.297027	0.062	0.282	1.08614e-17	4.54839
c_01.csv	Mdga2	4.16787e-22	-0.546841	0.998	0.983	1.10436e-17	0.98497
c_01.csv	Mical3	5.65763e-22	0.300038	0.983	0.932	1.4991e-17	0.948118
c_01.csv	Kank4	6.10094e-22	-0.377735	0.141	0.366	1.61656e-17	2.59574
c_01.csv	Fam19a2	7.19071e-22	-1.04774	0.191	0.415	1.90532e-17	2.17277
c_01.csv	Plch1	7.69431e-22	-0.290499	0.022	0.223	2.03876e-17	10.1364
c_01.csv	Igf1	7.74847e-22	0.271821	0.62	0.373	2.05311e-17	0.601613
c_01.csv	Arhgap24	9.27022e-22	-0.552862	0.377	0.576	2.45633e-17	1.52785
c_01.csv	Vav3	1.02826e-21	-0.629925	0.3	0.505	2.72459e-17	1.68333
c_01.csv	Crhr1	1.14934e-21	0.271854	0.593	0.387	3.04541e-17	0.652614
c_01.csv	Adamts16	1.20838e-21	-0.271046	0.094	0.319	3.20184e-17	3.39362
c_01.csv	Zbtb20	1.24154e-21	-0.580605	0.988	0.967	3.28971e-17	0.978745
c_01.csv	C230088H06Rik	1.26097e-21	0.301999	0.645	0.458	3.34119e-17	0.710078
c_01.csv	4930517O19Rik	1.33589e-21	-0.357031	0.179	0.415	3.53971e-17	2.31844
c_01.csv	Tmem65	1.37099e-21	-0.299016	0.156	0.39	3.63271e-17	2.5
c_01.csv	Usp53	1.40166e-21	-0.292226	0.171	0.414	3.71399e-17	2.42105
c_01.csv	Tbc1d2	1.43122e-21	0.260953	0.395	0.217	3.79231e-17	0.549367
c_01.csv	4930419G24Rik	1.77263e-21	0.310314	0.764	0.523	4.69693e-17	0.684555
c_01.csv	Grb10	1.89789e-21	0.27332	0.993	0.923	5.02883e-17	0.929507
c_01.csv	Klhl13	2.03815e-21	-0.542087	0.454	0.618	5.40048e-17	1.36123
c_01.csv	Pigk	2.20635e-21	-0.471887	0.667	0.766	5.84618e-17	1.14843
c_01.csv	Cask	2.66732e-21	0.268907	0.958	0.894	7.06759e-17	0.933194
c_01.csv	Syt4	2.80521e-21	0.273703	0.811	0.652	7.43297e-17	0.803946
c_01.csv	Scml4	2.91972e-21	0.380482	0.777	0.611	7.73638e-17	0.786358
c_01.csv	Cyth3	3.35132e-21	0.368827	0.739	0.579	8.88e-17	0.783491
c_01.csv	Nlk	3.82147e-21	-0.408938	0.856	0.895	1.01257e-16	1.04556
c_01.csv	Gng12	4.68786e-21	0.275694	0.362	0.194	1.24214e-16	0.535912
c_01.csv	Sipa1l1	5.30901e-21	0.320382	0.935	0.835	1.40673e-16	0.893048
c_01.csv	Slco2a1	5.86706e-21	-0.43817	0.248	0.459	1.55459e-16	1.85081
c_01.csv	5330417C22Rik	5.90684e-21	-0.395204	0.613	0.763	1.56514e-16	1.2447
c_01.csv	Gm21949	6.11447e-21	0.304843	0.891	0.692	1.62015e-16	0.776655
c_01.csv	Dapk1	6.12617e-21	0.329471	0.945	0.842	1.62325e-16	0.891005
c_01.csv	Nek7	6.72086e-21	-0.272138	0.077	0.291	1.78083e-16	3.77922
c_01.csv	Gm32647	7.26921e-21	-2.01613	0.169	0.373	1.92612e-16	2.2071
c_01.csv	St3gal1	8.40425e-21	-0.277593	0.055	0.262	2.22687e-16	4.76364
c_01.csv	Zfp536	9.19451e-21	-0.648879	0.037	0.234	2.43627e-16	6.32432
c_01.csv	Olfm3	9.61173e-21	-0.794317	0.591	0.689	2.54682e-16	1.16582
c_01.csv	2900011O08Rik	1.0286e-20	0.297823	0.965	0.884	2.72547e-16	0.916062
c_01.csv	Psd3	1.13419e-20	-0.412789	0.829	0.874	3.00526e-16	1.05428
c_01.csv	Bend7	1.1713e-20	-0.418184	0.122	0.335	3.10359e-16	2.7459
c_01.csv	Fyn	1.29018e-20	0.279911	0.921	0.818	3.4186e-16	0.888165
c_01.csv	Zbtb16	1.32684e-20	-0.272435	0.047	0.25	3.51573e-16	5.31915
c_01.csv	Gm45904	1.69749e-20	0.324408	0.663	0.47	4.49785e-16	0.708899
c_01.csv	Gm4876	1.99289e-20	-0.489343	0.35	0.557	5.28056e-16	1.59143
c_01.csv	Nhs	3.21436e-20	0.286443	0.846	0.69	8.51708e-16	0.815603
c_01.csv	Mctp2	3.26718e-20	-0.292664	0.087	0.298	8.65704e-16	3.42529
c_01.csv	Slc44a1	3.3774e-20	0.314864	0.871	0.771	8.9491e-16	0.885189
c_01.csv	Slit3	3.84227e-20	-0.881927	0.174	0.391	1.01809e-15	2.24713
c_01.csv	Gabra2	3.89893e-20	-0.77983	0.397	0.603	1.0331e-15	1.51889
c_01.csv	Nlgn1	4.65469e-20	-0.291048	1	0.994	1.23335e-15	0.994
c_01.csv	Slc10a4	5.29495e-20	0.253457	0.69	0.463	1.403e-15	0.671014
c_01.csv	Arid1b	5.66047e-20	0.324582	0.96	0.886	1.49985e-15	0.922917
c_01.csv	Hs3st4	6.57985e-20	-1.08359	0.084	0.284	1.74346e-15	3.38095
c_01.csv	Gm13944	6.87607e-20	-0.259754	0.01	0.189	1.82195e-15	18.9
c_01.csv	Bicc1	7.07453e-20	0.336554	0.831	0.671	1.87454e-15	0.807461
c_01.csv	Lmx1b	8.04587e-20	0.320738	0.829	0.63	2.13191e-15	0.759952
c_01.csv	Las1l	9.67797e-20	0.303791	0.908	0.789	2.56437e-15	0.868943
c_01.csv	Galnt13	1.06254e-19	-0.47714	0.918	0.938	2.8154e-15	1.02179
c_01.csv	Prr16	1.11404e-19	0.311999	0.995	0.896	2.95188e-15	0.900503
c_01.csv	Scn3a	1.12412e-19	0.270054	0.988	0.933	2.97857e-15	0.944332
c_01.csv	Ccdc30	1.355e-19	-0.367008	0.439	0.651	3.59034e-15	1.48292
c_01.csv	Mmp16	1.46581e-19	-0.385101	0.953	0.945	3.88395e-15	0.991605
c_01.csv	Atp2b2	1.52267e-19	0.318469	0.988	0.902	4.03461e-15	0.912955
c_01.csv	Fgf10	1.57326e-19	0.515219	0.367	0.2	4.16866e-15	0.544959
c_01.csv	Cys1	1.81513e-19	0.283558	0.521	0.347	4.80954e-15	0.666027
c_01.csv	Gabrg1	2.26999e-19	-0.590839	0.065	0.258	6.01479e-15	3.96923
c_01.csv	Dock2	2.50761e-19	-0.282756	0.134	0.344	6.64442e-15	2.56716
c_01.csv	Ptpn5	2.58589e-19	-0.63326	0.779	0.813	6.85184e-15	1.04365
c_01.csv	Lpp	3.68086e-19	-0.499874	0.452	0.646	9.75317e-15	1.4292
c_01.csv	Gm46102	3.96009e-19	-0.329168	0.052	0.241	1.0493e-14	4.63462
c_01.csv	Zfpm2	4.61326e-19	-0.661638	0.037	0.219	1.22238e-14	5.91892
c_01.csv	Grid1	5.72289e-19	0.263535	0.995	0.955	1.51639e-14	0.959799
c_01.csv	Trpc4	6.34199e-19	0.290107	0.697	0.483	1.68044e-14	0.69297
c_01.csv	C130073E24Rik	7.36338e-19	-0.652059	0.268	0.483	1.95107e-14	1.80224
c_01.csv	Gsg1l	7.5082e-19	-0.504608	0.347	0.509	1.98945e-14	1.46686
c_01.csv	Stac	7.77753e-19	-0.337638	0.025	0.204	2.06081e-14	8.16
c_01.csv	Ano2	7.7916e-19	-0.325705	0.032	0.21	2.06454e-14	6.5625
c_01.csv	Fgf1	7.82342e-19	-0.353183	0.266	0.485	2.07297e-14	1.82331
c_01.csv	Itgb8	8.30464e-19	-0.376198	0.238	0.443	2.20048e-14	1.86134
c_01.csv	St8sia6	1.13127e-18	-0.343549	0.161	0.36	2.99753e-14	2.23602
c_01.csv	Gabbr2	1.16238e-18	0.252688	0.983	0.902	3.07995e-14	0.917599
c_01.csv	Sdc2	1.16847e-18	-0.571641	0.7	0.799	3.0961e-14	1.14143
c_01.csv	Etv1	1.35648e-18	-0.463082	0.077	0.266	3.59427e-14	3.45455
c_01.csv	Fzd3	1.61946e-18	0.283363	0.66	0.485	4.29107e-14	0.734848
c_01.csv	Kctd16	2.81139e-18	-0.394078	0.608	0.354	7.44934e-14	0.582237
c_01.csv	Nebl	2.88696e-18	-0.645641	0.754	0.8	7.64959e-14	1.06101
c_01.csv	Kcnt2	2.97005e-18	-0.892308	0.246	0.429	7.86975e-14	1.7439
c_01.csv	Igsf3	3.58923e-18	0.256635	0.546	0.361	9.51037e-14	0.661172
c_01.csv	Ica1	3.61603e-18	-0.336879	0.943	0.921	9.58139e-14	0.97667
c_01.csv	Rab3b	4.11971e-18	-0.437455	0.052	0.232	1.0916e-13	4.46154
c_01.csv	Lmo7	4.58493e-18	-0.399099	0.31	0.502	1.21487e-13	1.61935
c_01.csv	Fut8	4.95393e-18	0.305422	0.948	0.861	1.31264e-13	0.908228
c_01.csv	Sv2b	5.02058e-18	-0.564374	0.414	0.557	1.3303e-13	1.34541
c_01.csv	Foxn3	5.02432e-18	0.292817	0.953	0.889	1.33129e-13	0.932844
c_01.csv	Elmo1	5.04449e-18	-0.650504	0.538	0.66	1.33664e-13	1.22677
c_01.csv	Tmem132c	6.63808e-18	-0.433432	0.082	0.271	1.75889e-13	3.30488
c_01.csv	Zfp618	7.79947e-18	0.319629	0.868	0.76	2.06663e-13	0.875576
c_01.csv	Cpeb1	8.6796e-18	-0.355666	0.556	0.699	2.29983e-13	1.25719
c_01.csv	Arhgap44	1.09958e-17	0.2749	0.963	0.885	2.91356e-13	0.919003
c_01.csv	Kctd8	1.11364e-17	-0.810102	0.052	0.224	2.9508e-13	4.30769
c_01.csv	Tmem181a	1.47185e-17	-0.329404	0.901	0.922	3.89995e-13	1.02331
c_01.csv	Gprin3	1.93676e-17	-0.326283	0.33	0.533	5.13184e-13	1.61515
c_01.csv	Limch1	1.97576e-17	-0.342961	0.878	0.897	5.23517e-13	1.02164
c_01.csv	Tspan5	2.10835e-17	-0.458865	0.561	0.702	5.5865e-13	1.25134
c_01.csv	Gm48091	2.39827e-17	-0.358638	0.258	0.472	6.35471e-13	1.82946
c_01.csv	Ntn1	2.70508e-17	-0.624137	0.799	0.75	7.16764e-13	0.938673
c_01.csv	Kcnh1	2.7694e-17	-0.384868	0.094	0.285	7.33808e-13	3.03191
c_01.csv	Cacng2	2.84555e-17	0.298071	0.844	0.739	7.53985e-13	0.875592
c_01.csv	Nsf	2.91581e-17	-0.32647	0.921	0.923	7.72602e-13	1.00217
c_01.csv	Gm15155	2.93417e-17	-0.540092	0.266	0.45	7.77466e-13	1.69173
c_01.csv	Fam210b	3.10843e-17	-0.311778	0.199	0.392	8.2364e-13	1.96985
c_01.csv	0610040J01Rik	3.17638e-17	-0.335348	0.117	0.304	8.41644e-13	2.59829
c_01.csv	Gm48321	3.58041e-17	-0.256265	0.055	0.234	9.48701e-13	4.25455
c_01.csv	Kcnip1	3.95322e-17	-0.596694	0.169	0.354	1.04748e-12	2.09467
c_01.csv	Ncam1	4.27595e-17	-0.277883	0.998	0.984	1.133e-12	0.985972
c_01.csv	Pkib	4.31505e-17	-0.309669	0.027	0.192	1.14336e-12	7.11111
c_01.csv	Ptpru	5.19326e-17	0.255988	0.921	0.719	1.37606e-12	0.780673
c_01.csv	Pcsk5	5.55941e-17	-0.356505	0.027	0.192	1.47308e-12	7.11111
c_01.csv	Ntn4	6.42712e-17	-0.263759	0.146	0.343	1.70299e-12	2.34932
c_01.csv	Oprm1	6.46424e-17	-0.343394	0.141	0.336	1.71283e-12	2.38298
c_01.csv	Spag5	6.47657e-17	-0.617456	0.702	0.755	1.7161e-12	1.0755
c_01.csv	Plekha5	7.6566e-17	0.252107	0.998	0.966	2.02877e-12	0.967936
c_01.csv	Neto1	8.97169e-17	-0.504385	0.04	0.203	2.37723e-12	5.075
c_01.csv	Etv5	9.6296e-17	-0.566022	0.489	0.607	2.55156e-12	1.24131
c_01.csv	Tacr3	9.70543e-17	-0.657267	0.139	0.316	2.57165e-12	2.27338
c_01.csv	Tmem232	1.29366e-16	-0.357834	0.104	0.284	3.42782e-12	2.73077
c_01.csv	Nova1	1.30059e-16	-0.564987	0.352	0.524	3.44616e-12	1.48864
c_01.csv	1700025G04Rik	1.67681e-16	-0.361376	0.658	0.767	4.44304e-12	1.16565
c_01.csv	Maml3	2.09543e-16	-0.531783	0.814	0.84	5.55225e-12	1.03194
c_01.csv	Rab27a	2.34598e-16	-0.284582	0.251	0.449	6.21613e-12	1.78884
c_01.csv	Ankrd34b	2.41904e-16	-0.251578	0.154	0.345	6.40973e-12	2.24026
c_01.csv	Ube2e2	2.43894e-16	-0.346015	0.985	0.968	6.46245e-12	0.982741
c_01.csv	Tango2	2.63079e-16	-0.326791	0.598	0.727	6.97081e-12	1.21572
c_01.csv	Ldlrad4	2.80494e-16	-0.538685	0.891	0.872	7.43226e-12	0.978676
c_01.csv	Susd4	2.85642e-16	-0.339802	0.563	0.697	7.56865e-12	1.23801
c_01.csv	Pde1c	3.77169e-16	-0.572315	0.154	0.337	9.99385e-12	2.18831
c_01.csv	Ehbp1	4.18384e-16	-0.528953	0.968	0.953	1.10859e-11	0.984504
c_01.csv	Snrk	4.47921e-16	0.271559	0.821	0.682	1.18686e-11	0.830694
c_01.csv	Fam167a	4.54851e-16	-0.290429	0.194	0.383	1.20522e-11	1.97423
c_01.csv	Tcerg1l	6.51114e-16	0.257261	0.323	0.177	1.72526e-11	0.547988
c_01.csv	4921534H16Rik	7.12825e-16	-0.447055	0.387	0.534	1.88877e-11	1.37984
c_01.csv	Srrm4	7.15119e-16	-0.440046	0.561	0.717	1.89485e-11	1.27807
c_01.csv	Iqgap2	1.03993e-15	-0.347297	0.342	0.542	2.7555e-11	1.5848
c_01.csv	Gm32618	1.20783e-15	-0.310495	0.298	0.499	3.20039e-11	1.6745
c_01.csv	Arhgap26	1.32078e-15	-0.427595	0.955	0.945	3.49968e-11	0.989529
c_01.csv	Eml6	1.34567e-15	-0.299747	0.965	0.951	3.56563e-11	0.985492
c_01.csv	Clybl	1.49692e-15	-0.462447	0.524	0.655	3.96639e-11	1.25
c_01.csv	Gbe1	1.94483e-15	0.274113	0.591	0.435	5.15323e-11	0.736041
c_01.csv	Wipf3	1.99699e-15	-0.36506	0.417	0.584	5.29142e-11	1.40048
c_01.csv	Sorcs1	2.03786e-15	-0.824791	0.298	0.48	5.39973e-11	1.61074
c_01.csv	Cerk	2.06702e-15	-0.278441	0.29	0.486	5.47699e-11	1.67586
c_01.csv	Tbc1d1	2.25975e-15	-0.294455	0.3	0.49	5.98766e-11	1.63333
c_01.csv	Rnf121	4.02744e-15	-0.400171	0.499	0.655	1.06715e-10	1.31263
c_01.csv	Nol4	4.24332e-15	-0.357642	0.908	0.909	1.12435e-10	1.0011
c_01.csv	Grk4	5.31134e-15	0.260437	0.576	0.423	1.40735e-10	0.734375
c_01.csv	Atxn2	6.59844e-15	-0.275671	0.864	0.888	1.74839e-10	1.02778
c_01.csv	Ptpn3	7.12045e-15	-0.273573	0.077	0.245	1.88671e-10	3.18182
c_01.csv	Khdrbs3	7.31363e-15	-0.521002	0.496	0.643	1.93789e-10	1.29637
c_01.csv	Dpysl5	7.95751e-15	0.263068	0.883	0.755	2.1085e-10	0.85504
c_01.csv	Nav2	8.51595e-15	-0.273673	0.99	0.971	2.25647e-10	0.980808
c_01.csv	Rap1gds1	1.08265e-14	-0.356581	0.896	0.896	2.86869e-10	1
c_01.csv	Gpr158	1.13493e-14	-0.392719	1	0.979	3.00723e-10	0.979
c_01.csv	Slc35f4	1.39495e-14	-0.482855	0.623	0.709	3.6962e-10	1.13804
c_01.csv	Cyth1	1.4413e-14	-0.353945	0.707	0.762	3.819e-10	1.07779
c_01.csv	Dgki	1.44514e-14	-0.347507	0.973	0.93	3.82918e-10	0.955807
c_01.csv	Larp1b	1.98858e-14	-0.294328	0.454	0.622	5.26914e-10	1.37004
c_01.csv	Gm32014	2.15566e-14	-0.312818	0.305	0.497	5.71187e-10	1.62951
c_01.csv	Celf2	2.17552e-14	-0.798062	0.993	0.97	5.76448e-10	0.976838
c_01.csv	Ccdc148	3.06278e-14	-0.338534	0.68	0.772	8.11544e-10	1.13529
c_01.csv	Mtcl1	3.47006e-14	-0.324416	0.424	0.586	9.19461e-10	1.38208
c_01.csv	Gm38505	3.69042e-14	-0.333214	0.05	0.197	9.77849e-10	3.94
c_01.csv	Plcxd3	3.89921e-14	-0.443282	0.821	0.872	1.03317e-09	1.06212
c_01.csv	Cdh12	4.5433e-14	-0.857592	0.233	0.391	1.20384e-09	1.67811
c_01.csv	Sema3e	4.83569e-14	-0.39086	0.047	0.194	1.28131e-09	4.12766
c_01.csv	Nell2	4.91894e-14	-0.401902	0.767	0.826	1.30337e-09	1.07692
c_01.csv	1110019D14Rik	5.12262e-14	0.392828	0.516	0.388	1.35734e-09	0.751938
c_01.csv	Htr4	5.17234e-14	-0.312198	0.042	0.186	1.37051e-09	4.42857
c_01.csv	Tigar	5.31587e-14	-0.262331	0.206	0.379	1.40854e-09	1.83981
c_01.csv	Smoc1	6.60595e-14	-0.255374	0.124	0.295	1.75038e-09	2.37903
c_01.csv	Supt20	7.68265e-14	0.251154	0.804	0.704	2.03567e-09	0.875622
c_01.csv	Kif16b	8.34098e-14	-0.314687	0.62	0.716	2.21011e-09	1.15484
c_01.csv	Spred1	8.34258e-14	-0.290168	0.367	0.549	2.21053e-09	1.49591
c_01.csv	Ror1	9.34971e-14	-0.255124	0.087	0.247	2.47739e-09	2.83908
c_01.csv	Slc38a2	1.01028e-13	-0.314899	0.432	0.618	2.67693e-09	1.43056
c_01.csv	4930555F03Rik	1.11825e-13	-0.492315	0.174	0.344	2.96302e-09	1.97701
c_01.csv	Rtl4	1.48916e-13	-0.606021	0.27	0.442	3.94582e-09	1.63704
c_01.csv	Lrba	1.54836e-13	-0.285426	0.854	0.881	4.10268e-09	1.03162
c_01.csv	Gm35188	1.68034e-13	-0.350632	0.824	0.846	4.45239e-09	1.0267
c_01.csv	Plekhg1	1.69971e-13	-0.476372	0.025	0.158	4.50371e-09	6.32
c_01.csv	Adgrv1	1.77016e-13	-0.517676	0.226	0.383	4.69041e-09	1.69469
c_01.csv	Galnt14	2.04834e-13	-0.264947	0.02	0.15	5.42749e-09	7.5
c_01.csv	Htr7	2.32903e-13	-0.268578	0.069	0.22	6.17123e-09	3.18841
c_01.csv	Pknox2	2.377e-13	-0.349648	0.638	0.738	6.29833e-09	1.15674
c_01.csv	Slc38a9	2.45764e-13	-0.292298	0.538	0.681	6.512e-09	1.2658
c_01.csv	Nxph1	2.61018e-13	-1.37853	0.283	0.452	6.91619e-09	1.59717
c_01.csv	Apba2	2.92136e-13	-0.355346	0.695	0.749	7.74072e-09	1.0777
c_01.csv	Nap1l5	3.14998e-13	-0.349659	0.63	0.757	8.3465e-09	1.20159
c_01.csv	Usp46	4.01525e-13	-0.262084	0.362	0.546	1.06392e-08	1.50829
c_01.csv	Dtnb	4.23399e-13	0.253065	0.963	0.921	1.12188e-08	0.956386
c_01.csv	Olfm1	4.52947e-13	-0.345581	0.288	0.45	1.20017e-08	1.5625
c_01.csv	Gbf1	5.8055e-13	-0.305813	0.95	0.94	1.53828e-08	0.989474
c_01.csv	Slc18a2	6.30033e-13	0.286179	0.998	0.885	1.6694e-08	0.886774
c_01.csv	Arhgap21	7.41133e-13	-0.275712	0.883	0.881	1.96378e-08	0.997735
c_01.csv	Slc16a7	7.45186e-13	-0.287246	0.38	0.541	1.97452e-08	1.42368
c_01.csv	Dpf3	9.4251e-13	-0.28051	0.112	0.264	2.49737e-08	2.35714
c_01.csv	Esr1	9.69599e-13	-0.281476	0.079	0.227	2.56915e-08	2.87342
c_01.csv	Thsd7b	1.07843e-12	-1.02808	0.375	0.495	2.85751e-08	1.32
c_01.csv	March3	1.27503e-12	-0.277037	0.136	0.294	3.37844e-08	2.16176
c_01.csv	Fstl4	1.32291e-12	-0.52272	0.055	0.19	3.50532e-08	3.45455
c_01.csv	Jam3	1.37631e-12	-0.298709	0.519	0.657	3.64681e-08	1.2659
c_01.csv	Gm1604a	1.38966e-12	-0.339362	0.216	0.376	3.68219e-08	1.74074
c_01.csv	Btbd9	1.39609e-12	-0.258641	0.928	0.928	3.69921e-08	1
c_01.csv	Cblb	1.40013e-12	-0.29439	0.414	0.562	3.70992e-08	1.35749
c_01.csv	AC154683.1	1.41183e-12	-0.267968	0.246	0.421	3.74092e-08	1.71138
c_01.csv	Pak1	1.47434e-12	-0.317873	0.672	0.753	3.90655e-08	1.12054
c_01.csv	Ift57	1.47757e-12	-0.252388	0.243	0.416	3.91511e-08	1.71193
c_01.csv	Nfasc	1.61919e-12	-0.26301	0.901	0.905	4.29038e-08	1.00444
c_01.csv	Gm20754	1.87163e-12	-0.780494	0.211	0.363	4.95926e-08	1.72038
c_01.csv	Abat	2.08888e-12	-0.311054	0.519	0.66	5.53491e-08	1.27168
c_01.csv	Gabra1	2.30138e-12	-0.315207	0.231	0.392	6.09797e-08	1.69697
c_01.csv	AC165271.1	2.34841e-12	-0.315305	0.298	0.442	6.22259e-08	1.48322
c_01.csv	Myo10	2.38834e-12	-0.283537	0.462	0.608	6.32838e-08	1.31602
c_01.csv	Gpr176	2.94724e-12	-0.275346	0.246	0.417	7.8093e-08	1.69512
c_01.csv	Epha10	3.07319e-12	-0.375536	0.764	0.763	8.14302e-08	0.998691
c_01.csv	Scn9a	3.68352e-12	-0.440164	0.747	0.803	9.76023e-08	1.07497
c_01.csv	Akap13	3.79522e-12	-0.279085	0.407	0.565	1.00562e-07	1.38821
c_01.csv	Csgalnact1	4.57123e-12	-0.303551	0.069	0.206	1.21124e-07	2.98551
c_01.csv	Pitpnm2	5.29599e-12	-0.264164	0.447	0.581	1.40328e-07	1.29978
c_01.csv	Rassf8	5.32118e-12	-0.273592	0.499	0.648	1.40995e-07	1.2986
c_01.csv	Evi5	5.40767e-12	-0.287861	0.692	0.777	1.43287e-07	1.12283
c_01.csv	A330102I10Rik	5.48797e-12	-0.344052	0.251	0.404	1.45415e-07	1.60956
c_01.csv	3632451O06Rik	5.68422e-12	-0.258265	0.295	0.459	1.50615e-07	1.55593
c_01.csv	Ano10	6.34128e-12	-0.273161	0.375	0.53	1.68025e-07	1.41333
c_01.csv	Otx2os1	8.08712e-12	-0.489855	0.055	0.182	2.14285e-07	3.30909
c_01.csv	Gm28153	8.47618e-12	-0.368313	0.34	0.499	2.24593e-07	1.46765
c_01.csv	Pclo	9.35008e-12	-0.258564	0.995	0.974	2.47749e-07	0.978894
c_01.csv	Pdlim5	1.23015e-11	-0.257781	0.194	0.347	3.25952e-07	1.78866
c_01.csv	Ankrd55	1.4301e-11	-0.326286	0.419	0.566	3.78935e-07	1.35084
c_01.csv	Ell2	1.5111e-11	-0.30813	0.169	0.324	4.00396e-07	1.91716
c_01.csv	Rorb	1.53558e-11	-0.584679	0.052	0.177	4.06882e-07	3.40385
c_01.csv	Kcnd2	1.78133e-11	-0.735377	0.893	0.898	4.71998e-07	1.0056
c_01.csv	Fam19a5	1.78405e-11	-0.294057	0.67	0.769	4.72719e-07	1.14776
c_01.csv	Plppr5	2.00121e-11	-0.337629	0.429	0.575	5.30261e-07	1.34033
c_01.csv	Gpr45	2.08819e-11	-0.274597	0.618	0.728	5.53308e-07	1.17799
c_01.csv	Arpp21	2.16114e-11	-0.383958	0.628	0.412	5.72636e-07	0.656051
c_01.csv	Npas2	2.55457e-11	-0.283474	0.149	0.297	6.76885e-07	1.99329
c_01.csv	Gm2516	2.8235e-11	-0.299072	0.124	0.267	7.48143e-07	2.15323
c_01.csv	Ralyl	2.94504e-11	-0.430701	1	0.973	7.80346e-07	0.973
c_01.csv	Scg3	3.46151e-11	-0.277964	0.35	0.507	9.17196e-07	1.44857
c_01.csv	Drp2	3.9368e-11	-0.28767	0.546	0.644	1.04313e-06	1.17949
c_01.csv	Mgat5b	4.53262e-11	-0.304514	0.35	0.482	1.20101e-06	1.37714
c_01.csv	Ust	4.75765e-11	-0.324724	0.04	0.158	1.26063e-06	3.95
c_01.csv	Vgf	5.09374e-11	-0.315244	0.107	0.243	1.34969e-06	2.27103
c_01.csv	Serpini1	6.02009e-11	0.368097	0.682	0.603	1.59514e-06	0.884164
c_01.csv	Camk2d	6.20626e-11	-0.296984	0.953	0.936	1.64447e-06	0.982162
c_01.csv	Prkag2	7.03297e-11	-0.30281	0.638	0.714	1.86353e-06	1.11912
c_01.csv	Gad2	7.66977e-11	-0.668414	0.117	0.245	2.03226e-06	2.09402
c_01.csv	Fam214a	7.74557e-11	-0.32221	0.605	0.713	2.05234e-06	1.17851
c_01.csv	Cadps2	8.19656e-11	-0.48631	0.933	0.869	2.17184e-06	0.931404
c_01.csv	Dpyd	8.26684e-11	-0.58398	0.762	0.786	2.19047e-06	1.0315
c_01.csv	Asxl3	8.72808e-11	-0.270827	0.419	0.572	2.31268e-06	1.36516
c_01.csv	Gm45323	9.19062e-11	-0.338398	0.164	0.308	2.43524e-06	1.87805
c_01.csv	Tacc1	1.0886e-10	-0.28242	0.645	0.737	2.88447e-06	1.14264
c_01.csv	Dixdc1	1.22164e-10	-0.256259	0.28	0.439	3.23699e-06	1.56786
c_01.csv	Ak5	1.23839e-10	-0.498982	0.275	0.412	3.28136e-06	1.49818
c_01.csv	Gm36975	1.34095e-10	0.266657	0.839	0.782	3.55311e-06	0.932062
c_01.csv	Rab31	1.36641e-10	-0.296995	0.273	0.423	3.62057e-06	1.54945
c_01.csv	Nfib	1.54705e-10	-0.571869	0.087	0.212	4.09921e-06	2.43678
c_01.csv	Agap1	1.75502e-10	-0.28736	0.945	0.934	4.65029e-06	0.98836
c_01.csv	Trpc5	2.06017e-10	-0.489846	0.194	0.336	5.45882e-06	1.73196
c_01.csv	Npsr1	2.19749e-10	-0.411404	0.04	0.151	5.82269e-06	3.775
c_01.csv	Mapk9	2.53503e-10	-0.266909	0.551	0.652	6.71707e-06	1.1833
c_01.csv	Tshz3	2.55165e-10	-0.256586	0.112	0.246	6.76111e-06	2.19643
c_01.csv	Gabra4	3.20312e-10	-0.327016	0.464	0.588	8.4873e-06	1.26724
c_01.csv	Klhl29	3.2559e-10	0.298677	0.918	0.893	8.62715e-06	0.972767
c_01.csv	Ptchd4	3.28292e-10	-0.43431	0.238	0.374	8.69875e-06	1.57143
c_01.csv	Man1a	3.42441e-10	-0.546948	0.119	0.246	9.07367e-06	2.06723
c_01.csv	Rnf150	3.53183e-10	-0.272299	0.566	0.705	9.35829e-06	1.24558
c_01.csv	Cep112	3.57803e-10	-0.564142	0.241	0.377	9.48071e-06	1.56432
c_01.csv	Fhl1	4.08621e-10	-0.250336	0.548	0.655	1.08272e-05	1.19526
c_01.csv	Frmpd1	4.56061e-10	-0.322956	0.37	0.502	1.20842e-05	1.35676
c_01.csv	Pappa	5.19152e-10	0.341541	0.506	0.385	1.3756e-05	0.76087
c_01.csv	Pacrg	5.64198e-10	-0.351988	0.566	0.68	1.49495e-05	1.20141
c_01.csv	4930447C04Rik	5.70628e-10	-0.283214	0.442	0.589	1.51199e-05	1.33258
c_01.csv	2010111I01Rik	6.04292e-10	-0.258391	0.868	0.879	1.60119e-05	1.01267
c_01.csv	Arhgap5	7.43451e-10	-0.291139	0.896	0.874	1.96992e-05	0.975446
c_01.csv	Celf3	7.62866e-10	-0.272279	0.769	0.813	2.02137e-05	1.05722
c_01.csv	Epb41l3	8.82026e-10	-0.504724	0.479	0.569	2.3371e-05	1.18789
c_01.csv	Arid5b	1.01228e-09	0.256679	0.752	0.644	2.68223e-05	0.856383
c_01.csv	Phactr3	1.16261e-09	-0.255358	0.715	0.776	3.08057e-05	1.08531
c_01.csv	Cap2	1.21507e-09	-0.276555	0.63	0.723	3.21958e-05	1.14762
c_01.csv	Bcl11a	1.28718e-09	0.293504	0.536	0.408	3.41065e-05	0.761194
c_01.csv	Chn2	1.34733e-09	-0.408012	0.3	0.427	3.57002e-05	1.42333
c_01.csv	Gramd1b	1.41878e-09	-0.252545	0.759	0.814	3.75935e-05	1.07246
c_01.csv	Mdh1	1.42703e-09	-0.319313	0.767	0.828	3.78121e-05	1.07953
c_01.csv	Ecel1	1.46948e-09	-0.285848	0.012	0.104	3.89369e-05	8.66667
c_01.csv	Ndnf	1.58973e-09	-0.443805	0.174	0.291	4.21232e-05	1.67241
c_01.csv	Rgl1	1.78305e-09	-0.328001	0.568	0.662	4.72455e-05	1.16549
c_01.csv	Gm45645	2.39621e-09	-0.283849	0.454	0.555	6.34923e-05	1.22247
c_01.csv	Hpcal1	2.52673e-09	-0.263132	0.258	0.394	6.69508e-05	1.52713
c_01.csv	Gm12239	3.23885e-09	-0.304638	0.089	0.207	8.58198e-05	2.32584
c_01.csv	Mcc	3.409e-09	-0.571788	0.849	0.817	9.03282e-05	0.962309
c_01.csv	Anxa1	3.46868e-09	-0.272015	0.015	0.104	9.19097e-05	6.93333
c_01.csv	Bsn	5.72173e-09	-0.268285	0.767	0.822	0.000151609	1.07171
c_01.csv	Grm7	5.81024e-09	-0.404807	0.61	0.762	0.000153954	1.24918
c_01.csv	Syt16	5.98823e-09	-0.262912	0.826	0.862	0.00015867	1.04358
c_01.csv	Mical2	6.00413e-09	-0.309928	0.464	0.575	0.000159092	1.23922
c_01.csv	Adarb1	6.68985e-09	-0.282302	0.563	0.675	0.000177261	1.19893
c_01.csv	Pdgfd	7.99879e-09	-0.312747	0.015	0.101	0.000211944	6.73333
c_01.csv	Rasgrp1	1.21423e-08	-0.292333	0.092	0.2	0.000321735	2.17391
c_01.csv	Gm45321	1.29458e-08	-0.315379	0.169	0.291	0.000343024	1.72189
c_01.csv	Bbs9	1.38804e-08	-0.276066	0.757	0.798	0.000367789	1.05416
c_01.csv	Hcrtr2	1.57059e-08	-0.298265	0.087	0.195	0.00041616	2.24138
c_01.csv	Syt9	1.68283e-08	-0.330709	0.372	0.49	0.0004459	1.3172
c_01.csv	Tshz2	1.74835e-08	-0.489212	0.127	0.244	0.000463259	1.92126
c_01.csv	Prune2	1.80072e-08	-0.263139	0.682	0.746	0.000477137	1.09384
c_01.csv	Map7	1.86222e-08	-0.293225	0.705	0.758	0.000493431	1.07518
c_01.csv	Gabrg3	1.86605e-08	-0.595064	0.561	0.643	0.000494446	1.14617
c_01.csv	Kcnh7	1.90993e-08	-0.321507	0.787	0.52	0.000506073	0.660737
c_01.csv	Phldb2	2.12889e-08	0.33638	0.543	0.446	0.000564092	0.821363
c_01.csv	Trhde	2.37884e-08	-0.289616	0.112	0.225	0.000630322	2.00893
c_01.csv	Ppp4r4	2.40676e-08	-0.274477	0.484	0.584	0.000637719	1.20661
c_01.csv	Pgr	2.8325e-08	-0.307069	0.452	0.57	0.000750527	1.26106
c_01.csv	Unc13b	4.23595e-08	-0.296947	0.645	0.714	0.0011224	1.10698
c_01.csv	Ptchd1	4.3707e-08	-0.294516	0.328	0.447	0.0011581	1.3628
c_01.csv	Arap2	4.56962e-08	-0.280357	0.476	0.571	0.00121081	1.19958
c_01.csv	4930509J09Rik	5.87274e-08	-0.278472	0.087	0.188	0.0015561	2.16092
c_01.csv	Synpr	6.19898e-08	-0.43342	0.057	0.149	0.00164254	2.61404
c_01.csv	Gm28928	6.41076e-08	-1.15968	0.074	0.17	0.00169866	2.2973
c_01.csv	Prlr	7.10805e-08	-0.664625	0.107	0.213	0.00188342	1.99065
c_01.csv	Chst11	7.53993e-08	-0.298125	0.481	0.591	0.00199785	1.22869
c_01.csv	Car10	9.20011e-08	-0.659389	0.335	0.442	0.00243775	1.3194
c_01.csv	Satb2	1.01576e-07	-0.411122	0.025	0.105	0.00269145	4.2
c_01.csv	Wdpcp	1.10614e-07	-0.29874	0.439	0.552	0.00293093	1.2574
c_01.csv	Grik1	1.11073e-07	-0.275268	0.826	0.578	0.00294311	0.699758
c_01.csv	Nfia	1.30045e-07	-0.46966	0.102	0.201	0.0034458	1.97059
c_01.csv	Slc1a2	1.60745e-07	-0.469693	0.73	0.741	0.00425925	1.01507
c_01.csv	Spag16	1.82339e-07	-0.259613	0.156	0.263	0.00483143	1.6859
c_01.csv	Dach1	2.06244e-07	-0.452645	0.087	0.182	0.00546484	2.09195
c_01.csv	Gm26883	2.69413e-07	-0.280241	0.074	0.169	0.00713864	2.28378
c_01.csv	Homer1	2.74508e-07	-0.2558	0.514	0.615	0.00727364	1.1965
c_01.csv	Zdbf2	3.01383e-07	-0.301777	0.543	0.636	0.00798575	1.17127
c_01.csv	Ppm1l	5.74296e-07	-0.259071	0.782	0.809	0.0152171	1.03453
c_01.csv	Brinp3	6.88469e-07	-0.842726	0.524	0.609	0.0182424	1.16221
c_01.csv	Cnksr2	8.04815e-07	-0.298746	0.911	0.889	0.0213252	0.975851
c_01.csv	Ptprm	8.71486e-07	-0.575165	0.303	0.402	0.0230918	1.32673
c_01.csv	Caln1	1.06815e-06	-0.431335	0.943	0.847	0.0283028	0.898197
c_01.csv	Parp8	1.5338e-06	-0.250388	0.893	0.872	0.040641	0.976484
c_01.csv	Zfp697	1.60897e-06	-0.252587	0.471	0.577	0.042633	1.22505
c_01.csv	Cul4b	1.61332e-06	0.302625	0.442	0.358	0.0427482	0.809955
c_01.csv	Xirp2	2.85164e-06	-0.519627	0.032	0.103	0.0755599	3.21875
c_01.csv	Kcnj6	3.16044e-06	-0.731856	0.988	0.903	0.0837421	0.913968
c_01.csv	Xylt1	3.33924e-06	-0.283708	0.672	0.718	0.08848	1.06845
c_01.csv	Diaph2	3.9204e-06	-0.279726	0.749	0.814	0.103879	1.08678
c_01.csv	Npas3	3.94784e-06	-0.759979	0.516	0.577	0.104606	1.11822
c_01.csv	Dpp10	4.61806e-06	-0.25086	0.995	0.92	0.122365	0.924623
c_01.csv	Rgs7bp	4.75525e-06	-0.324148	0.752	0.782	0.126	1.03989
c_01.csv	Ldhb	4.79325e-06	-0.256962	0.588	0.666	0.127007	1.13265
c_01.csv	Oxr1	5.22792e-06	-0.896294	0.548	0.592	0.138524	1.08029
c_01.csv	Vcan	5.39228e-06	-0.294226	0.119	0.204	0.142879	1.71429
c_01.csv	Dock4	5.44017e-06	-0.338986	0.978	0.909	0.144148	0.929448
c_01.csv	Tcf12	6.30295e-06	-0.318591	0.886	0.882	0.167009	0.995485
c_01.csv	Mbp	9.2847e-06	-0.345104	0.28	0.388	0.246017	1.38571
c_01.csv	Zeb2	9.31263e-06	-0.671365	0.084	0.159	0.246757	1.89286
c_01.csv	Nyap2	1.32504e-05	-0.309611	0.963	0.919	0.351097	0.954309
c_01.csv	Slit1	1.66011e-05	-0.250391	0.496	0.584	0.43988	1.17742
c_01.csv	Meis2	1.82727e-05	-0.719117	0.05	0.116	0.484173	2.32
c_01.csv	Asap1	1.90598e-05	-0.263176	0.777	0.804	0.505027	1.03475
c_01.csv	Gm13629	2.1068e-05	-0.280933	0.474	0.549	0.558238	1.15823
c_01.csv	Ano3	3.73921e-05	-0.287937	0.295	0.387	0.990778	1.31186
c_01.csv	Cartpt	4.52792e-05	-0.340235	0.069	0.137	1	1.98551
c_01.csv	Chrm2	4.98506e-05	-0.357175	0.089	0.162	1	1.82022
c_01.csv	Pde7b	5.3422e-05	-0.601847	0.256	0.334	1	1.30469
c_01.csv	Luzp2	5.70286e-05	-0.305966	0.824	0.857	1	1.04005
c_01.csv	Mast4	8.47694e-05	-0.315741	0.886	0.849	1	0.958239
c_01.csv	Baiap3	9.40556e-05	-0.369456	0.38	0.429	1	1.12895
c_01.csv	Ccdc171	9.63243e-05	-0.255229	0.591	0.624	1	1.05584
c_01.csv	Rfx3	9.78845e-05	-0.394478	0.72	0.759	1	1.05417
c_01.csv	Tle4	0.000108884	-0.253565	0.481	0.561	1	1.16632
c_01.csv	Scg2	0.000161452	-0.394353	0.685	0.749	1	1.09343
c_01.csv	Slc6a3	0.000193746	-0.367462	0.868	0.807	1	0.929724
c_01.csv	Gpc5	0.000260303	-0.77068	0.419	0.49	1	1.16945
c_01.csv	Shisa6	0.000977455	-0.475745	0.586	0.598	1	1.02048
c_01.csv	Frmpd4	0.00124376	-0.644471	0.737	0.71	1	0.963365
c_01.csv	Gad1	0.00143119	-0.355734	0.136	0.195	1	1.43382
c_01.csv	Tnik	0.00158147	-0.526757	0.851	0.78	1	0.916569
c_01.csv	Nrp2	0.00175175	-0.316903	0.258	0.296	1	1.14729
c_01.csv	Ptprk	0.00185533	-0.52801	0.653	0.637	1	0.975498
c_01.csv	Grik2	0.00203211	-0.619704	0.99	0.959	1	0.968687
c_01.csv	Slc4a4	0.00218625	-0.259241	0.122	0.18	1	1.47541
c_01.csv	Pde4b	0.00337556	-0.348779	0.965	0.907	1	0.939896
c_01.csv	Sox5	0.00340781	-0.476665	0.166	0.218	1	1.31325
c_01.csv	Slc24a2	0.00457275	-0.367864	0.923	0.865	1	0.937161
c_01.csv	Megf11	0.00466005	-0.312612	0.102	0.148	1	1.45098
c_01.csv	March4	0.00582853	-0.25025	0.859	0.822	1	0.956927
c_01.csv	Gabrb2	0.0066319	-0.301192	0.715	0.674	1	0.942657
c_01.csv	Rnf220	0.0100094	-0.411977	0.476	0.527	1	1.10714
c_01.csv	Lrrc4c	0.0100675	-0.527601	0.995	0.958	1	0.962814
c_01.csv	6530403H02Rik	0.0115575	-0.378771	0.132	0.175	1	1.32576
c_01.csv	Pld5	0.0143154	-0.299799	0.682	0.505	1	0.740469
c_01.csv	Ebf2	0.0151073	-0.278906	0.087	0.126	1	1.44828
c_01.csv	3300002A11Rik	0.0169013	-0.302976	0.553	0.566	1	1.02351
c_01.csv	Nos1ap	0.0311164	-0.258727	0.948	0.855	1	0.901899
c_01.csv	Fstl5	0.0534208	-0.510232	0.7	0.665	1	0.95
c_01.csv	Chrm3	0.0973282	-0.389319	0.404	0.425	1	1.05198
c_01.csv	Chsy3	0.154614	-0.320629	0.372	0.383	1	1.02957
c_01.csv	Limd1	0.159747	-0.265455	0.213	0.239	1	1.12207
c_01.csv	Kcnq5	0.192731	-0.573046	0.625	0.618	1	0.9888
c_01.csv	Sdk1	0.377754	-0.254698	0.983	0.86	1	0.874873
c_01.csv	Pcdh7	0.566369	-0.375916	0.953	0.903	1	0.947534
c_01.csv	Plcl1	0.645653	-0.2843	0.916	0.817	1	0.891921
c_01.csv	Sox6	0.653058	-0.341424	0.615	0.539	1	0.876423
c_01.csv	Glra2	0.666851	-0.271096	0.333	0.319	1	0.957958
c_01.csv	Ptgds	0.712984	-0.290266	0.258	0.264	1	1.02326
c_01.csv	Plp1	0.797953	-0.428969	0.29	0.293	1	1.01034
c_01.csv	Zfp804a	0.852889	-0.411692	0.717	0.648	1	0.903766
c_02.csv	Otx2os1	0	1.80714	0.903	0.171	0	0.189369
c_02.csv	Fam83b	0	0.269982	0.172	0.005	0	0.0290698
c_02.csv	Fst	0	0.524569	0.318	0.011	0	0.0345912
c_02.csv	Plekhg1	1.507e-275	1.20417	0.757	0.149	3.99309e-271	0.19683
c_02.csv	Plpp4	3.88545e-266	1.63021	0.925	0.262	1.02953e-261	0.283243
c_02.csv	Casr	1.2416e-251	1.07245	0.667	0.129	3.28987e-247	0.193403
c_02.csv	Hcrtr2	7.15335e-244	1.34647	0.774	0.187	1.89542e-239	0.241602
c_02.csv	Cdh6	7.77183e-242	1.85513	0.845	0.256	2.0593e-237	0.302959
c_02.csv	Eya1	2.26408e-241	0.953139	0.5	0.072	5.99915e-237	0.144
c_02.csv	Neurod6	4.92152e-238	0.772561	0.498	0.074	1.30405e-233	0.148594
c_02.csv	Nrp1	1.61945e-237	1.42433	0.879	0.247	4.29107e-233	0.281001
c_02.csv	Kcnab1	1.51908e-218	1.90426	0.993	0.498	4.02511e-214	0.501511
c_02.csv	Pde1c	3.75118e-207	1.31754	0.891	0.327	9.9395e-203	0.367003
c_02.csv	Cdh18	1.28966e-205	1.66499	1	0.942	3.41721e-201	0.942
c_02.csv	Dab2	1.48772e-204	0.738381	0.471	0.075	3.94202e-200	0.159236
c_02.csv	Otx1	1.31482e-202	0.483452	0.359	0.044	3.48387e-198	0.122563
c_02.csv	Tcf12	4.59881e-202	1.65781	0.993	0.881	1.21855e-197	0.88721
c_02.csv	Chn2	6.28105e-201	1.57031	0.93	0.419	1.66429e-196	0.450538
c_02.csv	A330015K06Rik	2.33507e-199	1.41078	0.896	0.319	6.18723e-195	0.356027
c_02.csv	Inpp4b	1.8611e-198	1.96008	0.995	0.824	4.93135e-194	0.828141
c_02.csv	Otx2	3.07446e-195	0.55924	0.417	0.061	8.14641e-191	0.146283
c_02.csv	Chrm2	1.02686e-193	1.40886	0.663	0.155	2.72086e-189	0.233786
c_02.csv	Il1rapl2	1.373e-192	1.94847	1	0.677	3.63803e-188	0.677
c_02.csv	Ext1	2.11497e-191	1.61564	0.998	0.879	5.60405e-187	0.880762
c_02.csv	Col23a1	1.22664e-182	1.46834	0.553	0.121	3.25022e-178	0.218807
c_02.csv	Ehbp1	1.78405e-179	1.3282	0.998	0.952	4.7272e-175	0.953908
c_02.csv	Stxbp6	2.04394e-179	1.03206	0.709	0.185	5.41583e-175	0.260931
c_02.csv	Zbtb7c	2.38904e-178	1.38544	0.879	0.375	6.33024e-174	0.426621
c_02.csv	Brinp3	2.92268e-173	1.74666	0.985	0.604	7.74423e-169	0.613198
c_02.csv	Dmd	3.59988e-172	1.05427	1	0.977	9.53859e-168	0.977
c_02.csv	Sorcs3	3.0096e-168	1.56916	0.985	0.504	7.97455e-164	0.511675
c_02.csv	Cdh13	7.68248e-164	1.41052	0.998	0.883	2.03563e-159	0.88477
c_02.csv	Mcc	2.0408e-163	1.30123	0.998	0.815	5.4075e-159	0.816633
c_02.csv	Ryr3	1.06008e-156	-2.0498	0.267	0.853	2.8089e-152	3.19476
c_02.csv	Rasal2	2.26722e-149	1.02801	0.995	0.929	6.00746e-145	0.933668
c_02.csv	Pmfbp1	4.61873e-149	0.634355	0.403	0.073	1.22383e-144	0.181141
c_02.csv	Gfra1	1.61667e-148	1.29514	0.995	0.581	4.2837e-144	0.58392
c_02.csv	Foxp2	1.88723e-146	1.16467	0.993	0.813	5.0006e-142	0.818731
c_02.csv	Cacna2d3	6.00887e-145	-2.56115	0.447	0.88	1.59217e-140	1.96868
c_02.csv	Kcnip1	1.11309e-144	1.19042	0.847	0.346	2.94936e-140	0.408501
c_02.csv	Lrp1b	1.84158e-144	-1.89042	0.934	0.985	4.87964e-140	1.0546
c_02.csv	Dkk2	1.12807e-141	0.629223	0.398	0.071	2.98904e-137	0.178392
c_02.csv	Khdrbs2	1.40079e-141	1.18728	0.998	0.863	3.71168e-137	0.864729
c_02.csv	C130073E24Rik	2.2647e-140	1.29564	0.939	0.475	6.00077e-136	0.505857
c_02.csv	Antxr2	4.20993e-139	0.831121	0.549	0.143	1.11551e-134	0.260474
c_02.csv	Gria1	5.51857e-138	-1.67386	0.595	0.932	1.46226e-133	1.56639
c_02.csv	Ghr	1.05716e-135	1.34454	0.985	0.741	2.80115e-131	0.752284
c_02.csv	Rora	6.54264e-131	-1.53208	0.803	0.963	1.7336e-126	1.19925
c_02.csv	Lrrtm4	3.87522e-130	-3.02901	0.449	0.868	1.02682e-125	1.93318
c_02.csv	Unc13c	1.04442e-129	1.30842	0.879	0.426	2.76741e-125	0.484642
c_02.csv	Clstn2	1.38215e-129	-2.22068	0.67	0.917	3.66229e-125	1.36866
c_02.csv	Col11a1	9.85797e-128	1.3925	0.825	0.365	2.61207e-123	0.442424
c_02.csv	Tenm3	3.05264e-127	1.2019	0.973	0.624	8.08857e-123	0.641316
c_02.csv	Fam155a	1.81999e-125	-0.91046	1	0.992	4.82243e-121	0.992
c_02.csv	Cbln4	6.12089e-125	0.57398	0.468	0.111	1.62185e-120	0.237179
c_02.csv	Rmst	8.14213e-125	1.28437	0.983	0.518	2.15742e-120	0.526958
c_02.csv	Antxr1	1.22457e-124	0.72618	0.5	0.13	3.24475e-120	0.26
c_02.csv	Kif26b	1.99137e-120	-1.40556	0.17	0.752	5.27654e-116	4.42353
c_02.csv	Gm32122	3.58238e-120	0.389312	0.252	0.035	9.49223e-116	0.138889
c_02.csv	Bend7	6.44797e-118	1.264	0.723	0.327	1.70852e-113	0.452282
c_02.csv	Nwd2	3.76753e-117	-2.25797	0.209	0.751	9.98283e-113	3.5933
c_02.csv	Trpc4	3.36533e-114	1.07137	0.876	0.48	8.91712e-110	0.547945
c_02.csv	Nova1	1.17897e-113	1.09848	0.879	0.517	3.12392e-109	0.588168
c_02.csv	Aldh1a1	5.55434e-113	1.12884	0.83	0.347	1.47173e-108	0.418072
c_02.csv	Erbb4	8.74025e-113	0.98432	1	0.903	2.3159e-108	0.903
c_02.csv	Thsd7b	3.1267e-111	1.0914	0.93	0.488	8.28482e-107	0.524731
c_02.csv	Sema6d	1.39331e-110	-1.76113	0.799	0.928	3.69186e-106	1.16145
c_02.csv	Pex5l	2.54484e-110	-2.81598	0.422	0.819	6.74306e-106	1.94076
c_02.csv	Gpc6	9.81425e-110	1.03955	1	0.898	2.60048e-105	0.898
c_02.csv	Gpr83	1.95211e-109	0.422471	0.352	0.07	5.17249e-105	0.198864
c_02.csv	Cntn1	5.70969e-109	0.723088	0.998	0.979	1.5129e-104	0.980962
c_02.csv	Tenm1	6.74605e-109	0.744098	0.998	0.952	1.7875e-104	0.953908
c_02.csv	4930555F03Rik	3.65732e-108	1.0313	0.777	0.336	9.69081e-104	0.432432
c_02.csv	Nrp2	1.6149e-107	0.955124	0.723	0.29	4.279e-103	0.401107
c_02.csv	Tmem132d	2.08509e-106	0.869103	0.818	0.33	5.52488e-102	0.403423
c_02.csv	Vwc2l	4.39581e-105	-1.97702	0.333	0.778	1.16476e-100	2.33634
c_02.csv	Cldn34c1	6.84977e-103	0.895051	0.738	0.361	1.81498e-98	0.48916
c_02.csv	Prdm8	8.87967e-103	0.43446	0.383	0.088	2.35285e-98	0.229765
c_02.csv	Gm45323	2.19865e-102	0.912059	0.726	0.301	5.82575e-98	0.414601
c_02.csv	B3galt1	1.54736e-101	0.89684	1	0.98	4.10003e-97	0.98
c_02.csv	Sgcd	2.80128e-101	-2.02269	0.925	0.933	7.42256e-97	1.00865
c_02.csv	Cdh12	2.8927e-101	1.16933	0.786	0.384	7.66478e-97	0.48855
c_02.csv	A830018L16Rik	1.05329e-100	0.76632	0.903	0.487	2.79091e-96	0.539313
c_02.csv	Adra1b	1.14174e-100	0.847972	0.692	0.299	3.02528e-96	0.432081
c_02.csv	Hs6st2	6.46031e-100	0.84307	0.75	0.319	1.71179e-95	0.425333
c_02.csv	Pde1a	1.45452e-99	1.0222	0.981	0.818	3.85405e-95	0.833843
c_02.csv	Mid1	9.67269e-98	0.913158	0.769	0.391	2.56297e-93	0.508453
c_02.csv	Asic2	4.97366e-97	-2.64836	0.333	0.789	1.31787e-92	2.36937
c_02.csv	Ebf3	1.16101e-96	1.04928	0.93	0.555	3.07633e-92	0.596774
c_02.csv	Ccser1	2.62814e-96	0.605108	0.995	0.985	6.96377e-92	0.98995
c_02.csv	Ptprz1	3.18883e-96	-1.63173	0.59	0.853	8.44945e-92	1.44576
c_02.csv	Adcyap1	1.90478e-95	0.43231	0.35	0.077	5.04711e-91	0.22
c_02.csv	Golim4	5.11023e-95	0.797738	0.665	0.279	1.35406e-90	0.419549
c_02.csv	Klhl1	8.783e-95	0.842413	0.998	0.867	2.32723e-90	0.868737
c_02.csv	Rab3c	5.04425e-94	-1.08955	0.837	0.964	1.33658e-89	1.15173
c_02.csv	Tspan18	9.49196e-94	0.471056	0.337	0.073	2.51508e-89	0.216617
c_02.csv	Sdc2	8.71517e-93	0.911406	0.968	0.795	2.30926e-88	0.821281
c_02.csv	Gpc3	4.92128e-92	0.460858	0.362	0.083	1.30399e-87	0.229282
c_02.csv	Vsnl1	8.3013e-90	-1.15925	0.801	0.937	2.1996e-85	1.16979
c_02.csv	Nrcam	9.41045e-90	0.705823	0.985	0.934	2.49349e-85	0.948223
c_02.csv	Cdh20	2.86307e-89	-1.5783	0.087	0.606	7.58628e-85	6.96552
c_02.csv	Cntnap2	3.10015e-89	0.703075	0.998	0.987	8.21448e-85	0.988978
c_02.csv	Kcnn2	1.52972e-88	0.916001	0.944	0.782	4.05329e-84	0.82839
c_02.csv	Gm2516	8.31892e-88	0.766727	0.648	0.261	2.20426e-83	0.402778
c_02.csv	Cpne4	1.33937e-87	-1.47084	0.553	0.863	3.54894e-83	1.56058
c_02.csv	Grin2b	2.17104e-87	0.583541	1	0.978	5.75262e-83	0.978
c_02.csv	Gabrg3	1.12238e-86	0.959588	0.968	0.638	2.97398e-82	0.659091
c_02.csv	Pbx3	7.93053e-86	-1.50382	0.762	0.889	2.10135e-81	1.16667
c_02.csv	Nrg1	1.22645e-85	-1.75345	0.833	0.941	3.24971e-81	1.12965
c_02.csv	Epha10	3.52709e-84	0.783206	0.947	0.761	9.34574e-80	0.80359
c_02.csv	Dcc	6.30643e-84	0.630985	1	0.971	1.67101e-79	0.971
c_02.csv	March4	7.47605e-84	0.916229	0.937	0.821	1.98093e-79	0.876201
c_02.csv	Cntn5	8.3142e-84	-2.90206	0.4	0.745	2.20301e-79	1.8625
c_02.csv	Fgf13	3.18867e-83	0.874662	0.973	0.846	8.44903e-79	0.869476
c_02.csv	Unc13b	1.25175e-82	0.85761	0.91	0.711	3.31676e-78	0.781319
c_02.csv	Gm45321	1.51009e-82	0.786472	0.667	0.285	4.00129e-78	0.427286
c_02.csv	Dab1	4.24676e-82	-1.11245	0.956	0.957	1.12526e-77	1.00105
c_02.csv	Tead1	5.45097e-81	0.863212	0.779	0.436	1.44434e-76	0.559692
c_02.csv	Epha4	1.39354e-78	-1.22603	0.063	0.554	3.69248e-74	8.79365
c_02.csv	Flrt2	6.70865e-78	0.980313	0.869	0.607	1.77759e-73	0.698504
c_02.csv	Utrn	1.01052e-77	0.720094	0.65	0.277	2.67759e-73	0.426154
c_02.csv	Opcml	4.17796e-77	0.673495	0.995	0.943	1.10703e-72	0.947739
c_02.csv	Adamtsl1	4.68898e-77	-2.14999	0.279	0.684	1.24244e-72	2.45161
c_02.csv	Efna5	2.8182e-76	0.770654	0.976	0.772	7.46738e-72	0.790984
c_02.csv	Grik1	1.06176e-75	-1.78082	0.121	0.587	2.81335e-71	4.85124
c_02.csv	Snca	1.60041e-75	0.795978	0.976	0.832	4.2406e-71	0.852459
c_02.csv	Mef2c	3.55059e-75	0.913264	0.874	0.622	9.40799e-71	0.71167
c_02.csv	Bcl11a	1.1227e-74	0.899454	0.767	0.405	2.97482e-70	0.528031
c_02.csv	Tgfbr3	2.69195e-74	0.895163	0.801	0.546	7.13285e-70	0.681648
c_02.csv	Negr1	4.2774e-74	-1.64131	0.893	0.964	1.13338e-69	1.07951
c_02.csv	Hs6st3	5.58804e-74	-2.68712	0.209	0.631	1.48066e-69	3.01914
c_02.csv	Tacr3	5.59148e-73	0.578919	0.721	0.308	1.48157e-68	0.427184
c_02.csv	Fstl5	2.25812e-72	1.02974	0.905	0.662	5.98334e-68	0.731492
c_02.csv	Atp2b2	3.30353e-72	-0.794764	0.711	0.905	8.75337e-68	1.27286
c_02.csv	Zfp521	8.62804e-72	-0.982336	0.092	0.556	2.28617e-67	6.04348
c_02.csv	Parm1	1.55403e-71	0.827902	0.796	0.502	4.11771e-67	0.630653
c_02.csv	Adcy2	1.01478e-70	1.15895	0.811	0.568	2.68887e-66	0.70037
c_02.csv	Ntng1	8.70501e-70	-2.20094	0.282	0.673	2.30657e-65	2.38652
c_02.csv	Sox6	1.73339e-69	-1.82245	0.112	0.545	4.59296e-65	4.86607
c_02.csv	Trpm3	4.07327e-69	0.509637	0.995	0.878	1.07929e-64	0.882412
c_02.csv	Celf2	4.67816e-69	0.395178	1	0.97	1.23957e-64	0.97
c_02.csv	Rph3a	1.26867e-68	-0.914078	0.146	0.592	3.36159e-64	4.05479
c_02.csv	Ripor2	3.30858e-68	-0.855515	0.1	0.557	8.76676e-64	5.57
c_02.csv	Frmpd4	3.47982e-68	-1.61028	0.354	0.715	9.22048e-64	2.01977
c_02.csv	Magi1	3.53013e-68	0.493693	1	0.982	9.35378e-64	0.982
c_02.csv	Grm1	4.80612e-68	-1.30772	0.216	0.633	1.27348e-63	2.93056
c_02.csv	Fmn1	7.80786e-68	-0.949497	0.354	0.737	2.06885e-63	2.08192
c_02.csv	Kcnd3	9.0266e-68	-1.1689	0.876	0.939	2.39178e-63	1.07192
c_02.csv	Slco3a1	1.08678e-67	-0.956658	0.524	0.81	2.87964e-63	1.5458
c_02.csv	Oprk1	2.07737e-67	0.749535	0.796	0.523	5.50441e-63	0.657035
c_02.csv	Csmd2	2.91985e-67	-0.876619	0.803	0.92	7.73673e-63	1.1457
c_02.csv	Wdpcp	5.74468e-67	0.815609	0.799	0.548	1.52217e-62	0.685857
c_02.csv	Slc2a13	1.51162e-66	-0.896864	0.549	0.849	4.00535e-62	1.54645
c_02.csv	Raver2	4.04492e-66	0.9256	0.704	0.428	1.07178e-61	0.607955
c_02.csv	Pde4b	4.2046e-66	0.549285	0.988	0.906	1.11409e-61	0.917004
c_02.csv	St6gal2	6.76911e-66	-0.786363	0.126	0.57	1.79361e-61	4.52381
c_02.csv	Btbd11	6.72903e-65	-0.926189	0.432	0.766	1.78299e-60	1.77315
c_02.csv	Msh3	6.76487e-65	0.924056	0.84	0.674	1.79249e-60	0.802381
c_02.csv	Syt10	7.20563e-65	0.444076	0.432	0.144	1.90928e-60	0.333333
c_02.csv	Vwa5b1	8.12054e-65	0.607624	0.709	0.356	2.1517e-60	0.502116
c_02.csv	Pcdh17	1.0766e-64	-1.10611	0.138	0.572	2.85267e-60	4.14493
c_02.csv	4930419G24Rik	4.26678e-64	-1.13797	0.097	0.532	1.13057e-59	5.48454
c_02.csv	Epha6	8.13723e-64	0.632177	1	0.902	2.15612e-59	0.902
c_02.csv	Sv2c	1.63142e-63	-1.5318	0.442	0.72	4.32276e-59	1.62896
c_02.csv	Pcdh15	2.61896e-63	0.769423	0.995	0.904	6.93945e-59	0.908543
c_02.csv	Amotl1	4.05116e-63	0.659501	0.881	0.672	1.07344e-58	0.76277
c_02.csv	Ammecr1	6.57716e-63	-0.835306	0.563	0.831	1.74275e-58	1.47602
c_02.csv	Gm45341	8.14478e-63	0.654908	0.541	0.225	2.15812e-58	0.415896
c_02.csv	Garnl3	8.34898e-63	-0.836348	0.648	0.864	2.21223e-58	1.33333
c_02.csv	Grik4	1.18833e-62	0.681519	0.937	0.749	3.14872e-58	0.79936
c_02.csv	Gm28154	2.65124e-62	0.260342	0.218	0.046	7.025e-58	0.211009
c_02.csv	Unc5d	5.96422e-62	-2.27954	0.129	0.54	1.58034e-57	4.18605
c_02.csv	Ebf1	5.42558e-61	1.11256	0.731	0.414	1.43761e-56	0.566347
c_02.csv	Stim2	6.00086e-61	0.714123	0.757	0.508	1.59005e-56	0.67107
c_02.csv	4921534H16Rik	6.05564e-61	-0.761755	0.112	0.537	1.60456e-56	4.79464
c_02.csv	Spats2l	1.20888e-60	-0.931517	0.369	0.722	3.20316e-56	1.95664
c_02.csv	Cadm2	2.03412e-60	-1.08493	1	0.993	5.38982e-56	0.993
c_02.csv	Srgap2	2.04216e-60	0.571482	0.964	0.887	5.4111e-56	0.920124
c_02.csv	Gm16070	2.21271e-60	0.438787	0.393	0.133	5.86301e-56	0.338422
c_02.csv	Ppp2r2b	8.43465e-60	-0.650884	0.951	0.973	2.23493e-55	1.02313
c_02.csv	Cntnap5c	1.92067e-59	0.5957	0.786	0.44	5.0892e-55	0.559796
c_02.csv	Atp11c	2.23349e-59	0.794107	0.789	0.561	5.91809e-55	0.711027
c_02.csv	Thsd7a	1.28e-58	-0.986522	0.342	0.732	3.39162e-54	2.14035
c_02.csv	Fndc3a	1.50794e-58	0.517431	0.954	0.843	3.99558e-54	0.883648
c_02.csv	Ptchd1	1.69374e-58	-0.682047	0.034	0.451	4.48789e-54	13.2647
c_02.csv	Zfp385b	2.92281e-58	0.614953	0.828	0.514	7.74457e-54	0.620773
c_02.csv	Sorcs2	4.33689e-58	-0.69289	0.104	0.519	1.14915e-53	4.99038
c_02.csv	Slc9a9	6.68569e-58	-0.953259	0.325	0.718	1.77151e-53	2.20923
c_02.csv	Lemd1	7.1157e-58	0.647715	0.619	0.318	1.88545e-53	0.513732
c_02.csv	Epha3	1.22869e-57	-0.78902	0.107	0.524	3.25565e-53	4.8972
c_02.csv	Cadps2	1.17814e-56	0.654262	0.995	0.869	3.12173e-52	0.873367
c_02.csv	Plpp3	1.63337e-56	0.321886	0.347	0.108	4.32795e-52	0.311239
c_02.csv	Lrtm1	1.84189e-56	-0.590754	0.015	0.416	4.88044e-52	27.7333
c_02.csv	Slco2a1	2.79334e-56	0.628091	0.74	0.453	7.40151e-52	0.612162
c_02.csv	Slc1a2	7.31211e-56	0.614837	0.92	0.739	1.93749e-51	0.803261
c_02.csv	Gm33680	8.6079e-56	0.292517	0.257	0.065	2.28084e-51	0.252918
c_02.csv	Pde8b	1.46862e-55	0.685408	0.862	0.572	3.89141e-51	0.663573
c_02.csv	Otud7a	2.03322e-55	-0.705648	0.76	0.925	5.38743e-51	1.21711
c_02.csv	Pard3b	3.14361e-55	0.701361	0.667	0.339	8.32962e-51	0.508246
c_02.csv	Ntm	6.39072e-55	-1.51877	0.636	0.831	1.69335e-50	1.3066
c_02.csv	Iqgap2	9.31848e-55	-0.709261	0.136	0.545	2.46912e-50	4.00735
c_02.csv	Luzp2	2.34289e-54	0.611502	0.993	0.855	6.20797e-50	0.861027
c_02.csv	Plcl1	4.51003e-54	-0.921571	0.456	0.823	1.19502e-49	1.80482
c_02.csv	Rcan2	2.24948e-53	-0.917302	0.684	0.861	5.96046e-49	1.25877
c_02.csv	Sncaip	2.4186e-53	-0.941431	0.456	0.734	6.40856e-49	1.60965
c_02.csv	Kcng3	2.91601e-53	0.453343	0.439	0.174	7.72654e-49	0.396355
c_02.csv	Galnt13	3.39484e-53	0.546232	0.988	0.937	8.99531e-49	0.948381
c_02.csv	Ssbp3	6.86896e-53	0.613862	0.852	0.693	1.82007e-48	0.81338
c_02.csv	Mast4	2.5835e-52	-0.791411	0.6	0.853	6.8455e-48	1.42167
c_02.csv	Pcdh10	3.54202e-52	0.731139	0.845	0.669	9.38528e-48	0.791716
c_02.csv	Rbms3	5.46126e-52	-0.832679	0.934	0.943	1.44707e-47	1.00964
c_02.csv	Anks1b	6.81891e-52	-0.524089	1	0.99	1.80681e-47	0.99
c_02.csv	Ano4	7.60879e-52	-0.919337	0.155	0.556	2.0161e-47	3.5871
c_02.csv	Gpr26	8.15491e-52	-0.468794	0.022	0.409	2.16081e-47	18.5909
c_02.csv	Msra	8.84037e-52	-0.825795	0.359	0.701	2.34243e-47	1.95265
c_02.csv	Cpne9	1.04661e-51	0.350214	0.311	0.097	2.77321e-47	0.311897
c_02.csv	Plppr1	1.30302e-51	0.626128	0.888	0.714	3.45262e-47	0.804054
c_02.csv	Dlgap1	2.54294e-51	-0.73599	0.973	0.979	6.73804e-47	1.00617
c_02.csv	Lpl	4.28389e-51	0.304183	0.289	0.084	1.1351e-46	0.290657
c_02.csv	Ctnnd2	6.03154e-51	-0.510331	0.998	0.989	1.59818e-46	0.990982
c_02.csv	Enox1	1.21595e-50	-0.957414	0.456	0.759	3.2219e-46	1.66447
c_02.csv	Sgms1	2.22924e-50	-0.604489	0.519	0.82	5.90681e-46	1.57996
c_02.csv	Nckap5	3.03757e-50	-0.919124	0.061	0.437	8.04864e-46	7.16393
c_02.csv	Gm37459	5.61636e-50	-0.653127	0.034	0.406	1.48817e-45	11.9412
c_02.csv	Cask	1.07873e-49	0.533119	0.961	0.894	2.8583e-45	0.930281
c_02.csv	9330158H04Rik	1.6492e-49	0.364837	0.206	0.049	4.36988e-45	0.237864
c_02.csv	Cdc14a	1.65612e-49	0.327165	0.294	0.09	4.38821e-45	0.306122
c_02.csv	Apba1	2.73756e-49	-0.814166	0.983	0.973	7.2537e-45	0.989827
c_02.csv	Ston2	2.25518e-48	0.562943	0.587	0.313	5.97555e-44	0.53322
c_02.csv	Grk3	3.04766e-48	-0.623305	0.34	0.689	8.07538e-44	2.02647
c_02.csv	Tmem255a	4.13068e-48	0.673288	0.862	0.689	1.09451e-43	0.799304
c_02.csv	Rims1	4.35675e-48	0.43828	0.998	0.984	1.15441e-43	0.985972
c_02.csv	Eif4g3	5.52843e-48	-0.514323	0.833	0.938	1.46487e-43	1.12605
c_02.csv	Plcg2	7.87186e-48	0.50087	0.536	0.271	2.08581e-43	0.505597
c_02.csv	Gm21949	8.8269e-48	-0.629979	0.352	0.699	2.33886e-43	1.9858
c_02.csv	Syn2	1.1944e-47	-0.95186	0.284	0.63	3.16479e-43	2.21831
c_02.csv	Golm1	1.52425e-47	0.292656	0.26	0.076	4.03879e-43	0.292308
c_02.csv	Rreb1	2.33221e-47	-1.19305	0.434	0.697	6.17967e-43	1.60599
c_02.csv	Arid5b	2.85179e-47	-0.669976	0.267	0.651	7.5564e-43	2.4382
c_02.csv	Ralgps2	7.22383e-47	0.583561	0.869	0.756	1.9141e-42	0.869965
c_02.csv	Sema6a	5.37026e-46	0.551464	0.643	0.356	1.42296e-41	0.553655
c_02.csv	Slc44a5	5.46554e-46	-1.02124	0.269	0.606	1.4482e-41	2.25279
c_02.csv	Dgkb	9.67067e-46	0.416103	0.998	0.949	2.56244e-41	0.950902
c_02.csv	B230217J21Rik	1.94232e-45	0.350129	0.333	0.114	5.14656e-41	0.342342
c_02.csv	Palmd	3.2524e-45	-0.609177	0.121	0.478	8.61789e-41	3.95041
c_02.csv	Dpp6	5.71557e-45	0.445347	1	0.986	1.51445e-40	0.986
c_02.csv	Osbpl6	9.29875e-45	-0.77415	0.447	0.741	2.46389e-40	1.65772
c_02.csv	Scn9a	1.10709e-44	0.488155	0.93	0.8	2.93345e-40	0.860215
c_02.csv	Zim1	1.26009e-44	-0.554557	0.121	0.492	3.33887e-40	4.06612
c_02.csv	St6galnac5	1.33788e-44	-0.892761	0.41	0.674	3.54499e-40	1.6439
c_02.csv	Zmat4	3.55106e-44	-0.790513	0.153	0.503	9.40925e-40	3.28758
c_02.csv	Sorbs2	7.47399e-44	0.443635	0.985	0.941	1.98038e-39	0.95533
c_02.csv	Lhfp	1.11497e-43	-0.812866	0.16	0.511	2.95434e-39	3.19375
c_02.csv	Qk	2.32481e-43	-0.917854	0.488	0.744	6.16005e-39	1.52459
c_02.csv	Abhd2	4.42812e-43	0.594535	0.655	0.442	1.17332e-38	0.674809
c_02.csv	Nsf	6.68753e-43	-0.53019	0.777	0.924	1.77199e-38	1.18919
c_02.csv	Brinp1	1.45828e-42	-0.969631	0.597	0.777	3.86401e-38	1.30151
c_02.csv	Gm15584	1.46538e-42	0.391007	0.308	0.109	3.88283e-38	0.353896
c_02.csv	Atrnl1	2.18546e-42	-0.700143	0.609	0.837	5.79082e-38	1.37438
c_02.csv	Lix1	2.43691e-42	-1.15611	0.209	0.533	6.45708e-38	2.55024
c_02.csv	Alcam	3.00897e-42	0.573264	0.92	0.703	7.97286e-38	0.76413
c_02.csv	Grb14	3.22589e-42	-0.499048	0.102	0.451	8.54764e-38	4.42157
c_02.csv	Grin3a	6.48493e-42	0.561133	0.825	0.558	1.71831e-37	0.676364
c_02.csv	Zfhx4	2.45371e-41	0.55315	0.886	0.712	6.50159e-37	0.803612
c_02.csv	Sv2b	4.99372e-41	-0.716551	0.235	0.559	1.32319e-36	2.37872
c_02.csv	Runx1t1	5.6906e-41	-0.789142	0.192	0.534	1.50784e-36	2.78125
c_02.csv	Npsr1	5.70303e-41	0.620611	0.369	0.147	1.51113e-36	0.398374
c_02.csv	Kcns3	5.8144e-41	-0.784741	0.114	0.442	1.54064e-36	3.87719
c_02.csv	Lpp	8.1867e-41	-0.737227	0.33	0.647	2.16923e-36	1.96061
c_02.csv	2010111I01Rik	1.03448e-40	-0.54489	0.67	0.881	2.74106e-36	1.31493
c_02.csv	Frmd3	2.41462e-40	0.555868	0.867	0.735	6.39803e-36	0.847751
c_02.csv	Mir124a-1hg	3.31331e-40	-0.647113	0.641	0.828	8.77929e-36	1.29173
c_02.csv	Crhr1	4.4286e-40	-0.411416	0.058	0.394	1.17345e-35	6.7931
c_02.csv	Plxdc2	5.65584e-40	-1.08477	0.085	0.412	1.49863e-35	4.84706
c_02.csv	Mkl2	2.07077e-39	-0.525408	0.6	0.85	5.48692e-35	1.41667
c_02.csv	Ntn1	2.28564e-39	0.544588	0.964	0.747	6.05625e-35	0.774896
c_02.csv	Ahi1	2.37433e-39	0.393235	1	0.985	6.29126e-35	0.985
c_02.csv	Il1rap	4.49239e-39	-0.798181	0.563	0.756	1.19035e-34	1.34281
c_02.csv	Immp2l	8.21878e-39	-0.675849	0.796	0.904	2.17773e-34	1.13568
c_02.csv	Grid1	8.50822e-39	-0.598717	0.932	0.956	2.25442e-34	1.02575
c_02.csv	Dgkk	1.71424e-38	0.407978	0.381	0.157	4.54221e-34	0.412073
c_02.csv	Unc5c	1.99084e-38	-0.784333	0.949	0.944	5.27514e-34	0.994731
c_02.csv	Cpeb1	2.50731e-38	-0.491703	0.369	0.702	6.64362e-34	1.90244
c_02.csv	Igf1	2.98498e-38	-0.665468	0.066	0.38	7.9093e-34	5.75758
c_02.csv	Nnat	5.69151e-38	0.567522	0.888	0.72	1.50808e-33	0.810811
c_02.csv	C79798	1.00121e-37	-0.494915	0.172	0.512	2.6529e-33	2.97674
c_02.csv	St8sia2	2.03942e-37	0.340218	0.379	0.157	5.40386e-33	0.414248
c_02.csv	D430041D05Rik	2.28252e-37	-0.572663	0.597	0.834	6.04799e-33	1.39698
c_02.csv	Nectin3	4.48028e-37	-0.501639	0.092	0.412	1.18714e-32	4.47826
c_02.csv	Cplx1	5.52765e-37	-0.732219	0.386	0.668	1.46466e-32	1.73057
c_02.csv	Gm15155	6.25615e-37	-0.688669	0.141	0.452	1.65769e-32	3.20567
c_02.csv	Myo1d	8.97726e-37	-0.482023	0.255	0.586	2.37871e-32	2.29804
c_02.csv	Dpyd	1.2088e-36	-0.87131	0.58	0.788	3.20295e-32	1.35862
c_02.csv	Ppp1r9a	1.68509e-36	-0.6257	0.752	0.921	4.46498e-32	1.22473
c_02.csv	Pdgfc	1.69853e-36	-0.536536	0.163	0.492	4.5006e-32	3.0184
c_02.csv	Sema3a	1.89338e-36	0.419541	0.252	0.087	5.01689e-32	0.345238
c_02.csv	Chst11	3.14287e-36	-0.52628	0.257	0.594	8.32767e-32	2.31128
c_02.csv	Slc22a23	3.83198e-36	-0.501448	0.33	0.658	1.01536e-31	1.99394
c_02.csv	Adgrv1	5.4426e-36	0.452495	0.636	0.378	1.44213e-31	0.59434
c_02.csv	Camta1	1.53682e-35	-0.51429	0.893	0.952	4.07212e-31	1.06607
c_02.csv	Daam1	1.6534e-35	0.472709	0.905	0.859	4.38102e-31	0.949171
c_02.csv	Ppp3ca	3.29552e-35	-0.483392	0.942	0.976	8.73213e-31	1.03609
c_02.csv	Klhl14	3.55152e-35	0.273478	0.243	0.078	9.41046e-31	0.320988
c_02.csv	Adamts6	9.20987e-35	-0.712043	0.318	0.613	2.44034e-30	1.92767
c_02.csv	Amy1	2.38975e-34	0.488239	0.862	0.772	6.33212e-30	0.895592
c_02.csv	Prtg	3.18084e-34	0.515602	0.471	0.256	8.42828e-30	0.543524
c_02.csv	Pld5	3.46208e-34	-1.09168	0.235	0.511	9.17347e-30	2.17447
c_02.csv	Adcy8	3.77821e-34	-0.768004	0.087	0.383	1.00111e-29	4.4023
c_02.csv	Siah3	4.926e-34	-0.402082	0.095	0.401	1.30524e-29	4.22105
c_02.csv	Ak5	8.60233e-34	-0.725824	0.114	0.414	2.27936e-29	3.63158
c_02.csv	Lmo4	9.03903e-34	-0.530483	0.238	0.541	2.39507e-29	2.27311
c_02.csv	Gucy2c	1.08583e-33	-0.42889	0.107	0.413	2.87711e-29	3.85981
c_02.csv	Prkd1	1.25222e-33	-0.527927	0.09	0.386	3.31801e-29	4.28889
c_02.csv	Fut8	1.2947e-33	0.459347	0.937	0.861	3.43057e-29	0.91889
c_02.csv	Cnksr2	1.35899e-33	-0.635541	0.828	0.891	3.60092e-29	1.07609
c_02.csv	Homer2	1.67203e-33	-0.517816	0.345	0.664	4.43038e-29	1.92464
c_02.csv	Scn8a	1.72689e-33	-0.496534	0.629	0.837	4.57574e-29	1.33068
c_02.csv	Gabrb2	2.69918e-33	0.462898	0.864	0.672	7.15201e-29	0.777778
c_02.csv	Paqr3	3.10745e-33	0.515236	0.672	0.516	8.2338e-29	0.767857
c_02.csv	Ndnf	4.23183e-33	-0.666737	0.022	0.293	1.12131e-28	13.3182
c_02.csv	Gm15738	4.41445e-33	-0.442368	0.386	0.698	1.1697e-28	1.80829
c_02.csv	Gm48003	4.57804e-33	-0.3329	0.007	0.276	1.21304e-28	39.4286
c_02.csv	Caln1	4.70388e-33	-0.833801	0.823	0.849	1.24639e-28	1.03159
c_02.csv	Akap6	5.33862e-33	0.331899	0.998	0.981	1.41458e-28	0.982966
c_02.csv	Ncald	8.91724e-33	0.462653	0.886	0.797	2.3628e-28	0.899549
c_02.csv	Gpr45	1.04111e-32	-0.494706	0.461	0.73	2.75863e-28	1.58351
c_02.csv	Ephb1	1.30754e-32	-0.749926	0.056	0.331	3.46459e-28	5.91071
c_02.csv	Gm45881	1.47285e-32	-0.594826	0.731	0.856	3.90262e-28	1.171
c_02.csv	Astn1	1.52763e-32	0.391523	0.978	0.936	4.04775e-28	0.957055
c_02.csv	Nyap2	1.8781e-32	0.366587	0.983	0.919	4.97639e-28	0.934893
c_02.csv	Mllt3	2.19511e-32	0.467753	0.949	0.878	5.81638e-28	0.925184
c_02.csv	Drd2	2.86765e-32	-0.787391	0.536	0.676	7.5984e-28	1.26119
c_02.csv	Shisa9	3.67114e-32	0.408186	0.964	0.891	9.72743e-28	0.924274
c_02.csv	Chl1	3.86482e-32	0.418621	0.927	0.86	1.02406e-27	0.927724
c_02.csv	Ptprm	5.49595e-32	-0.806213	0.114	0.404	1.45626e-27	3.54386
c_02.csv	Hunk	5.68085e-32	-0.388986	0.087	0.38	1.50525e-27	4.36782
c_02.csv	AC159282.1	7.18779e-32	0.680928	0.583	0.393	1.90455e-27	0.674099
c_02.csv	Itpr1	7.49887e-32	-0.543439	0.393	0.664	1.98698e-27	1.68957
c_02.csv	Ano5	8.13525e-32	0.348928	0.35	0.152	2.1556e-27	0.434286
c_02.csv	Parva	8.81522e-32	0.575036	0.464	0.269	2.33577e-27	0.579741
c_02.csv	Lingo1	9.40945e-32	-0.392824	0.32	0.643	2.49322e-27	2.00937
c_02.csv	0610040J01Rik	1.31177e-31	-0.415125	0.034	0.305	3.47578e-27	8.97059
c_02.csv	Man1c1	2.30508e-31	-0.405707	0.194	0.504	6.10777e-27	2.59794
c_02.csv	Lepr	2.74688e-31	-0.495001	0.053	0.329	7.27842e-27	6.20755
c_02.csv	Sipa1l1	2.80532e-31	-0.503364	0.643	0.839	7.43325e-27	1.30482
c_02.csv	Thrb	3.69792e-31	-0.943886	0.427	0.676	9.79837e-27	1.58314
c_02.csv	Gm15398	4.12298e-31	0.551202	0.862	0.697	1.09247e-26	0.808585
c_02.csv	Adamts16	5.44027e-31	-0.310713	0.044	0.32	1.44151e-26	7.27273
c_02.csv	Pak7	6.94938e-31	0.435846	0.881	0.756	1.84138e-26	0.858116
c_02.csv	Slc24a2	8.19732e-31	0.311485	0.954	0.865	2.17205e-26	0.906709
c_02.csv	Epha5	9.18823e-31	0.389334	0.998	0.95	2.4346e-26	0.951904
c_02.csv	Mfsd4a	1.12283e-30	0.50112	0.546	0.365	2.97518e-26	0.668498
c_02.csv	Rtl4	1.35629e-30	-0.873461	0.167	0.443	3.59377e-26	2.65269
c_02.csv	Galnt16	2.00181e-30	0.466134	0.663	0.468	5.30421e-26	0.705882
c_02.csv	Slit3	2.54232e-30	-1.04546	0.119	0.392	6.73638e-26	3.29412
c_02.csv	Ssbp2	7.10657e-30	-0.547153	0.799	0.888	1.88303e-25	1.11139
c_02.csv	Atp2b4	7.34169e-30	0.473856	0.772	0.608	1.94533e-25	0.787565
c_02.csv	Vgll4	8.13423e-30	0.477696	0.57	0.383	2.15533e-25	0.67193
c_02.csv	Ubl3	1.03094e-29	-0.386061	0.277	0.587	2.73168e-25	2.11913
c_02.csv	Pde4d	1.58222e-29	0.313444	0.998	0.989	4.1924e-25	0.990982
c_02.csv	Kirrel3	2.8187e-29	0.617563	0.932	0.806	7.46872e-25	0.864807
c_02.csv	Gm13963	3.67025e-29	-0.327898	0.078	0.352	9.72506e-25	4.51282
c_02.csv	Syt17	4.62569e-29	0.469503	0.893	0.702	1.22567e-24	0.786114
c_02.csv	Slc8a1	5.47803e-29	-0.563218	0.973	0.968	1.45151e-24	0.994861
c_02.csv	Vwc2	5.55231e-29	-0.52484	0.058	0.317	1.47119e-24	5.46552
c_02.csv	Dennd2a	6.17487e-29	0.424003	0.677	0.51	1.63615e-24	0.753323
c_02.csv	Kcnb2	6.59601e-29	0.332583	0.99	0.938	1.74775e-24	0.947475
c_02.csv	Add3	7.07596e-29	-0.355415	0.172	0.475	1.87492e-24	2.76163
c_02.csv	St8sia6	9.30899e-29	-0.383461	0.09	0.361	2.4666e-24	4.01111
c_02.csv	Col25a1	1.27082e-28	-1.47626	0.449	0.637	3.36729e-24	1.41871
c_02.csv	Mitf	1.55742e-28	-0.415843	0.175	0.466	4.1267e-24	2.66286
c_02.csv	2010300C02Rik	1.65363e-28	-0.34096	0.085	0.364	4.38162e-24	4.28235
c_02.csv	Adamts17	1.78256e-28	-0.433826	0.376	0.657	4.72325e-24	1.74734
c_02.csv	Colgalt2	2.19932e-28	-0.503626	0.177	0.453	5.82753e-24	2.55932
c_02.csv	Rps6ka6	2.37741e-28	0.28445	0.342	0.159	6.29944e-24	0.464912
c_02.csv	Rbfox1	3.08617e-28	-2.18789	0.592	0.736	8.17743e-24	1.24324
c_02.csv	Slit1	4.46149e-28	0.397649	0.74	0.581	1.18216e-23	0.785135
c_02.csv	Gm29514	4.591e-28	0.434872	0.471	0.271	1.21648e-23	0.575372
c_02.csv	Dlg1	4.67721e-28	0.434679	0.913	0.851	1.23932e-23	0.932092
c_02.csv	Rnpc3	4.78389e-28	0.418507	0.879	0.815	1.26759e-23	0.92719
c_02.csv	Slitrk1	6.59981e-28	-0.315189	0.18	0.479	1.74875e-23	2.66111
c_02.csv	Usp12	9.18283e-28	0.450319	0.609	0.449	2.43317e-23	0.737274
c_02.csv	Mkx	9.56161e-28	0.438409	0.624	0.388	2.53354e-23	0.621795
c_02.csv	Dok5	9.77761e-28	0.478401	0.633	0.475	2.59077e-23	0.750395
c_02.csv	Tmem163	9.91499e-28	-0.571579	0.155	0.424	2.62718e-23	2.73548
c_02.csv	Resp18	1.02064e-27	0.523424	0.796	0.699	2.7044e-23	0.878141
c_02.csv	Pdlim5	1.05933e-27	-0.35701	0.085	0.349	2.8069e-23	4.10588
c_02.csv	Ndst4	1.29302e-27	-0.543754	0.061	0.309	3.42612e-23	5.06557
c_02.csv	Gpr149	1.36681e-27	0.254785	0.187	0.06	3.62162e-23	0.320856
c_02.csv	Vstm2a	1.55994e-27	0.483824	0.626	0.46	4.13337e-23	0.734824
c_02.csv	Pbdc1	1.63285e-27	-0.527621	0.403	0.662	4.32655e-23	1.64268
c_02.csv	Sdk1	1.81212e-27	0.507293	0.968	0.86	4.80157e-23	0.88843
c_02.csv	Calb1	1.8166e-27	0.455678	0.621	0.407	4.81346e-23	0.655395
c_02.csv	Tmem132b	1.91166e-27	0.399909	0.939	0.852	5.06532e-23	0.907348
c_02.csv	Esrrg	1.94988e-27	-0.535136	0.612	0.815	5.16661e-23	1.3317
c_02.csv	Nebl	2.10048e-27	-0.690946	0.621	0.802	5.56564e-23	1.29147
c_02.csv	Ajap1	2.41359e-27	0.424027	0.83	0.716	6.3953e-23	0.862651
c_02.csv	Pigk	2.67913e-27	-0.527272	0.558	0.768	7.09889e-23	1.37634
c_02.csv	Nexmif	3.66062e-27	0.463832	0.927	0.86	9.69953e-23	0.927724
c_02.csv	Apbb2	3.68383e-27	-0.432944	0.833	0.918	9.76104e-23	1.10204
c_02.csv	Lypd1	4.09178e-27	-0.391855	0.046	0.293	1.0842e-22	6.36957
c_02.csv	Fry	4.43482e-27	0.321415	0.981	0.953	1.17509e-22	0.971458
c_02.csv	Cacna2d2	4.6286e-27	-0.462423	0.553	0.755	1.22644e-22	1.36528
c_02.csv	Rasgrf1	6.75629e-27	-1.01271	0.199	0.436	1.79021e-22	2.19095
c_02.csv	Olfm3	7.95151e-27	0.492279	0.876	0.685	2.10691e-22	0.781963
c_02.csv	Trps1	1.00118e-26	0.443281	0.886	0.795	2.65282e-22	0.897291
c_02.csv	Rims2	1.31314e-26	0.290388	1	0.978	3.47944e-22	0.978
c_02.csv	Cadps	1.96263e-26	-0.372989	0.995	0.98	5.20039e-22	0.984925
c_02.csv	Aplp1	2.32451e-26	0.391808	0.769	0.648	6.15926e-22	0.842653
c_02.csv	Nck2	3.3397e-26	-0.324589	0.061	0.307	8.84921e-22	5.03279
c_02.csv	Macrod2	3.45204e-26	-0.405968	0.998	0.988	9.14688e-22	0.98998
c_02.csv	Snx24	3.51372e-26	-0.440825	0.405	0.666	9.31029e-22	1.64444
c_02.csv	Vav3	3.83731e-26	-0.643337	0.252	0.505	1.01677e-21	2.00397
c_02.csv	Kcnma1	4.5823e-26	-0.361769	0.985	0.984	1.21417e-21	0.998985
c_02.csv	Nxpe4	4.62644e-26	-0.399818	0.306	0.58	1.22587e-21	1.89542
c_02.csv	Ryr2	4.64612e-26	-0.971124	0.398	0.603	1.23108e-21	1.51508
c_02.csv	Kcnd2	4.73785e-26	0.296749	0.973	0.897	1.25539e-21	0.921891
c_02.csv	Galntl6	5.08252e-26	-0.698231	0.995	0.966	1.34672e-21	0.970854
c_02.csv	Gm28376	5.46879e-26	-0.398507	0.056	0.291	1.44907e-21	5.19643
c_02.csv	Syt4	6.10512e-26	0.497731	0.76	0.653	1.61767e-21	0.859211
c_02.csv	Etv5	6.18623e-26	-0.632901	0.388	0.608	1.63917e-21	1.56701
c_02.csv	Ly6h	6.60055e-26	0.402473	0.944	0.904	1.74895e-21	0.957627
c_02.csv	Gm40841	7.58601e-26	0.423292	0.789	0.67	2.01007e-21	0.849176
c_02.csv	Rps6ka3	8.09215e-26	0.560569	0.871	0.808	2.14418e-21	0.927669
c_02.csv	Ddah1	1.65173e-25	0.37563	0.84	0.677	4.3766e-21	0.805952
c_02.csv	Abr	1.67246e-25	0.359516	0.951	0.917	4.43152e-21	0.964248
c_02.csv	Tll1	1.93392e-25	-1.01429	0.345	0.555	5.12432e-21	1.6087
c_02.csv	Unc80	2.41314e-25	-0.313078	0.961	0.969	6.3941e-21	1.00832
c_02.csv	Arhgef11	3.11441e-25	-0.374397	0.672	0.868	8.25225e-21	1.29167
c_02.csv	Kcnq5	3.13509e-25	-1.10514	0.383	0.621	8.30705e-21	1.62141
c_02.csv	Nell2	3.18129e-25	0.3889	0.903	0.825	8.42948e-21	0.913621
c_02.csv	Dock10	3.8808e-25	0.291267	0.684	0.458	1.0283e-20	0.669591
c_02.csv	Cck	5.76074e-25	0.403627	0.631	0.457	1.52642e-20	0.724247
c_02.csv	Fam168a	6.48956e-25	-0.366578	0.835	0.919	1.71954e-20	1.1006
c_02.csv	Etv6	7.52489e-25	-0.428891	0.396	0.649	1.99387e-20	1.63889
c_02.csv	Slc6a1	7.68998e-25	-0.397393	0.172	0.449	2.03761e-20	2.61047
c_02.csv	Atp2b1	9.48367e-25	-0.565902	0.566	0.776	2.51289e-20	1.37102
c_02.csv	St3gal1	1.25728e-24	-0.295023	0.036	0.263	3.33141e-20	7.30556
c_02.csv	Patj	1.29693e-24	0.392605	0.718	0.578	3.43646e-20	0.805014
c_02.csv	Arid1b	1.61296e-24	-0.400866	0.76	0.889	4.27386e-20	1.16974
c_02.csv	Cpne6	1.99943e-24	-0.361814	0.175	0.435	5.29788e-20	2.48571
c_02.csv	Greb1	2.00786e-24	-0.306955	0.07	0.312	5.32022e-20	4.45714
c_02.csv	Nrip3	2.10507e-24	-0.345055	0.175	0.439	5.57781e-20	2.50857
c_02.csv	Tmem158	2.6739e-24	0.261736	0.269	0.118	7.08503e-20	0.438662
c_02.csv	Nbea	2.72366e-24	-0.326358	0.99	0.985	7.21689e-20	0.994949
c_02.csv	Hs3st4	3.46787e-24	-1.10097	0.058	0.284	9.18882e-20	4.89655
c_02.csv	Cdc42bpa	3.60098e-24	0.331737	0.978	0.945	9.54151e-20	0.966258
c_02.csv	Garem1	4.62306e-24	-0.374532	0.335	0.602	1.22497e-19	1.79701
c_02.csv	Ankfn1	4.81507e-24	-0.884317	0.243	0.467	1.27585e-19	1.92181
c_02.csv	Wasf3	6.06926e-24	-0.442233	0.6	0.785	1.60817e-19	1.30833
c_02.csv	Trpc5	7.07009e-24	-0.592367	0.1	0.337	1.87336e-19	3.37
c_02.csv	A930012L18Rik	7.65216e-24	0.337526	0.405	0.233	2.02759e-19	0.575309
c_02.csv	Rgs6	7.65671e-24	-1.30803	0.762	0.729	2.0288e-19	0.956693
c_02.csv	Oxr1	7.71269e-24	-1.10602	0.357	0.595	2.04363e-19	1.66667
c_02.csv	Gm29865	7.74464e-24	0.457569	0.386	0.222	2.0521e-19	0.57513
c_02.csv	Drp2	8.06221e-24	-0.375943	0.4	0.646	2.13624e-19	1.615
c_02.csv	Agap1	8.16318e-24	0.296839	0.949	0.934	2.163e-19	0.984194
c_02.csv	Scg3	1.1124e-23	0.433718	0.655	0.503	2.94752e-19	0.767939
c_02.csv	Gm26873	1.13779e-23	-0.345378	0.085	0.322	3.01481e-19	3.78824
c_02.csv	Arhgap6	1.25104e-23	-0.701304	0.459	0.682	3.31488e-19	1.48584
c_02.csv	Lmo7	1.31688e-23	-0.354472	0.226	0.503	3.48934e-19	2.22566
c_02.csv	Arhgap20	1.35737e-23	-0.420264	0.296	0.555	3.59663e-19	1.875
c_02.csv	Jph1	1.68961e-23	-0.284403	0.029	0.243	4.47696e-19	8.37931
c_02.csv	Chrna6	2.10726e-23	0.380334	0.738	0.526	5.5836e-19	0.712737
c_02.csv	Gm4876	2.68208e-23	0.410237	0.716	0.552	7.1067e-19	0.77095
c_02.csv	Gm32647	2.80262e-23	-2.05526	0.148	0.374	7.4261e-19	2.52703
c_02.csv	Srgap1	4.60593e-23	0.318991	0.956	0.859	1.22043e-18	0.898536
c_02.csv	Plcb4	4.90767e-23	-0.59649	0.888	0.896	1.30039e-18	1.00901
c_02.csv	Rgs7bp	5.18072e-23	-0.511089	0.602	0.784	1.37273e-18	1.30233
c_02.csv	Pdzrn3	5.44485e-23	-0.424633	0.051	0.274	1.44272e-18	5.37255
c_02.csv	Tmeff2	5.45258e-23	-0.846429	0.854	0.883	1.44477e-18	1.03396
c_02.csv	Galnt7	5.92661e-23	-0.333329	0.199	0.463	1.57037e-18	2.32663
c_02.csv	9030622O22Rik	6.2536e-23	0.318722	0.888	0.622	1.65702e-18	0.70045
c_02.csv	Zfp804b	6.91547e-23	-1.51823	0.192	0.419	1.83239e-18	2.18229
c_02.csv	3300002A11Rik	7.94777e-23	-0.604885	0.325	0.569	2.10592e-18	1.75077
c_02.csv	Gm15261	8.39096e-23	-0.461373	0.165	0.414	2.22335e-18	2.50909
c_02.csv	Slco5a1	9.69663e-23	0.261969	0.279	0.129	2.56932e-18	0.462366
c_02.csv	Slc39a12	9.70964e-23	-0.264238	0.058	0.282	2.57276e-18	4.86207
c_02.csv	Lrrc4c	1.08991e-22	0.358737	0.981	0.958	2.88793e-18	0.976555
c_02.csv	Gm3173	1.98495e-22	0.359147	0.49	0.324	5.25952e-18	0.661224
c_02.csv	Rasgrf2	2.32529e-22	0.385114	0.927	0.848	6.16133e-18	0.914779
c_02.csv	Ttc28	2.52759e-22	0.344384	0.92	0.844	6.69735e-18	0.917391
c_02.csv	A330008L17Rik	2.83192e-22	0.430844	0.84	0.635	7.50373e-18	0.755952
c_02.csv	Fam184a	3.31142e-22	-0.59961	0.883	0.886	8.77427e-18	1.0034
c_02.csv	Mbnl2	4.02372e-22	-0.407085	0.794	0.906	1.06617e-17	1.14106
c_02.csv	3632451O06Rik	4.33498e-22	0.431755	0.602	0.456	1.14864e-17	0.757475
c_02.csv	Kcnh1	5.47633e-22	0.328274	0.478	0.28	1.45106e-17	0.585774
c_02.csv	Cacnb4	5.6716e-22	-0.419635	0.825	0.905	1.5028e-17	1.09697
c_02.csv	Dgki	6.01821e-22	0.347874	0.985	0.93	1.59465e-17	0.944162
c_02.csv	Ncam2	6.13036e-22	0.295812	0.993	0.912	1.62436e-17	0.918429
c_02.csv	Mef2a	6.78191e-22	-0.345286	0.791	0.904	1.797e-17	1.14286
c_02.csv	Epha7	7.41487e-22	-0.449388	0.289	0.529	1.96472e-17	1.83045
c_02.csv	Son	1.18692e-21	0.330551	0.937	0.928	3.14497e-17	0.990395
c_02.csv	5730522E02Rik	1.28058e-21	0.475499	0.835	0.749	3.39316e-17	0.897006
c_02.csv	Prss12	1.33332e-21	0.297624	0.306	0.152	3.53289e-17	0.496732
c_02.csv	Cntnap5a	1.35971e-21	0.340129	0.983	0.898	3.60282e-17	0.91353
c_02.csv	Tnfrsf19	1.4704e-21	0.309324	0.367	0.197	3.89612e-17	0.536785
c_02.csv	Fhit	1.63632e-21	-0.462307	0.845	0.913	4.33577e-17	1.08047
c_02.csv	Pcdh19	1.71404e-21	0.431904	0.694	0.534	4.54169e-17	0.769452
c_02.csv	Pde7b	1.8019e-21	-0.822737	0.117	0.335	4.7745e-17	2.86325
c_02.csv	Gm32618	1.82717e-21	0.408479	0.626	0.495	4.84146e-17	0.790735
c_02.csv	Cpne8	2.14135e-21	0.338798	0.718	0.562	5.67395e-17	0.78273
c_02.csv	Ubash3b	2.80855e-21	-0.421931	0.369	0.621	7.44182e-17	1.68293
c_02.csv	Myo6	2.81266e-21	-0.362958	0.471	0.706	7.45271e-17	1.49894
c_02.csv	Abcg2	3.21378e-21	0.2809	0.35	0.187	8.51555e-17	0.534286
c_02.csv	Sorl1	3.34827e-21	-0.317883	0.352	0.608	8.87191e-17	1.72727
c_02.csv	Gab1	3.41847e-21	-0.348208	0.041	0.244	9.05792e-17	5.95122
c_02.csv	Maml2	4.40656e-21	-0.554466	0.306	0.54	1.16761e-16	1.76471
c_02.csv	Npas2	4.76914e-21	-0.356246	0.083	0.298	1.26368e-16	3.59036
c_02.csv	Gm16351	4.89826e-21	0.332655	0.478	0.304	1.29789e-16	0.635983
c_02.csv	Srrm4	5.67138e-21	0.306695	0.83	0.714	1.50275e-16	0.860241
c_02.csv	N4bp2	5.99534e-21	0.367993	0.629	0.484	1.58858e-16	0.769475
c_02.csv	Dync1i1	6.78637e-21	-0.328273	0.959	0.955	1.79819e-16	0.995829
c_02.csv	Gm13052	7.56374e-21	0.368683	0.767	0.668	2.00416e-16	0.870926
c_02.csv	Brinp2	1.00077e-20	0.406714	0.726	0.59	2.65173e-16	0.812672
c_02.csv	Tmem2	1.15238e-20	0.334191	0.413	0.252	3.05347e-16	0.610169
c_02.csv	Myrip	1.22741e-20	0.372659	0.845	0.773	3.25227e-16	0.914793
c_02.csv	Gria2	1.48848e-20	-0.260195	0.998	0.987	3.94403e-16	0.988978
c_02.csv	Podxl2	1.61338e-20	0.395632	0.782	0.703	4.27496e-16	0.898977
c_02.csv	Ypel2	1.6263e-20	-0.379278	0.4	0.64	4.3092e-16	1.6
c_02.csv	Kazn	1.84476e-20	0.34837	0.714	0.602	4.88806e-16	0.843137
c_02.csv	Dnm3	1.9492e-20	-0.301158	0.959	0.967	5.16479e-16	1.00834
c_02.csv	Prickle1	2.13933e-20	-0.404893	0.779	0.889	5.66859e-16	1.14121
c_02.csv	Kcnk9	2.39103e-20	-0.349543	0.085	0.294	6.33552e-16	3.45882
c_02.csv	Robo1	2.90363e-20	-0.463353	0.99	0.944	7.69376e-16	0.953535
c_02.csv	Rassf3	2.93426e-20	0.302105	0.403	0.238	7.77492e-16	0.590571
c_02.csv	Cpne2	3.30654e-20	-0.302443	0.124	0.349	8.76134e-16	2.81452
c_02.csv	Rai14	3.42935e-20	-0.282985	0.049	0.249	9.08674e-16	5.08163
c_02.csv	Hdac9	4.52446e-20	-0.643485	0.983	0.96	1.19885e-15	0.976602
c_02.csv	Ctdspl	4.83521e-20	-0.386553	0.709	0.834	1.28119e-15	1.1763
c_02.csv	Adra1a	5.03909e-20	-0.377516	0.015	0.193	1.33521e-15	12.8667
c_02.csv	Lamb1	6.20939e-20	0.293126	0.408	0.244	1.6453e-15	0.598039
c_02.csv	Ano2	7.14434e-20	0.268564	0.381	0.206	1.89304e-15	0.540682
c_02.csv	Strip2	8.31323e-20	0.289089	0.284	0.142	2.20276e-15	0.5
c_02.csv	Stac	8.56488e-20	-0.337407	0.022	0.205	2.26944e-15	9.31818
c_02.csv	Lrrn2	8.58199e-20	-0.350686	0.43	0.671	2.27397e-15	1.56047
c_02.csv	Large1	1.09799e-19	-0.335502	0.949	0.966	2.90934e-15	1.01791
c_02.csv	Slc39a11	1.19304e-19	-0.274175	0.231	0.482	3.16119e-15	2.08658
c_02.csv	Arf3	1.76294e-19	-0.290022	0.345	0.605	4.67126e-15	1.75362
c_02.csv	Mpp7	2.01828e-19	0.356315	0.748	0.621	5.34785e-15	0.830214
c_02.csv	Fat3	2.12075e-19	-0.547535	0.85	0.86	5.61935e-15	1.01176
c_02.csv	Tango2	2.51783e-19	-0.330649	0.512	0.728	6.6715e-15	1.42188
c_02.csv	Aifm3	3.78055e-19	-0.277302	0.09	0.294	1.00173e-14	3.26667
c_02.csv	St6gal1	3.94903e-19	-0.316638	0.126	0.343	1.04637e-14	2.72222
c_02.csv	B3gat1	5.07786e-19	0.312003	0.517	0.362	1.34548e-14	0.700193
c_02.csv	Gas7	8.8865e-19	-0.362244	0.131	0.343	2.35466e-14	2.61832
c_02.csv	Fam19a1	9.40011e-19	-1.51612	0.391	0.558	2.49075e-14	1.42711
c_02.csv	Glp2r	1.0607e-18	-0.364153	0.148	0.363	2.81055e-14	2.4527
c_02.csv	Carmil3	1.0732e-18	0.36348	0.767	0.677	2.84365e-14	0.88266
c_02.csv	Lnx1	1.19613e-18	-0.335309	0.432	0.665	3.16937e-14	1.53935
c_02.csv	Cit	1.30678e-18	-0.390873	0.772	0.883	3.46256e-14	1.14378
c_02.csv	Lyn	1.32573e-18	0.355865	0.534	0.4	3.51279e-14	0.749064
c_02.csv	Dok6	1.46951e-18	0.259678	0.985	0.954	3.89377e-14	0.968528
c_02.csv	Phka1	1.50356e-18	0.357599	0.777	0.712	3.98397e-14	0.916345
c_02.csv	Gabra1	1.57582e-18	0.300797	0.558	0.388	4.17546e-14	0.695341
c_02.csv	Plxna1	1.75301e-18	-0.274268	0.238	0.478	4.64494e-14	2.0084
c_02.csv	Mamld1	1.81538e-18	-0.252894	0.087	0.294	4.81021e-14	3.37931
c_02.csv	Gm11418	1.90348e-18	-0.250443	0.002	0.163	5.04366e-14	81.5
c_02.csv	Tshz2	2.61498e-18	-0.68801	0.063	0.244	6.92892e-14	3.87302
c_02.csv	Dgkz	3.37957e-18	-0.37302	0.417	0.617	8.95485e-14	1.47962
c_02.csv	Spock3	3.48694e-18	-0.787827	0.568	0.734	9.23934e-14	1.29225
c_02.csv	Zfp804a	3.61232e-18	-0.803071	0.459	0.651	9.57155e-14	1.4183
c_02.csv	Pdzd8	4.74176e-18	0.394952	0.706	0.638	1.25642e-13	0.903683
c_02.csv	Tmem232	5.3562e-18	-0.338986	0.09	0.285	1.41923e-13	3.16667
c_02.csv	Col8a1	6.60522e-18	-0.338475	0.083	0.276	1.75019e-13	3.3253
c_02.csv	Chsy3	6.99779e-18	-0.808526	0.192	0.386	1.85421e-13	2.01042
c_02.csv	Nav1	7.16052e-18	0.275506	0.951	0.928	1.89732e-13	0.975815
c_02.csv	Man2a1	8.9867e-18	-0.334112	0.238	0.463	2.38121e-13	1.94538
c_02.csv	Alk	1.00433e-17	-0.795757	0.308	0.483	2.66118e-13	1.56818
c_02.csv	Slc44a1	1.01703e-17	-0.351637	0.563	0.775	2.69483e-13	1.37655
c_02.csv	Ntsr1	1.04208e-17	0.342959	0.675	0.511	2.76121e-13	0.757037
c_02.csv	March3	1.05413e-17	-0.286642	0.095	0.294	2.79314e-13	3.09474
c_02.csv	Scg2	1.11293e-17	0.364132	0.82	0.748	2.94893e-13	0.912195
c_02.csv	Lbh	1.14371e-17	-0.271743	0.194	0.408	3.03048e-13	2.10309
c_02.csv	Ndufs4	1.16133e-17	0.355125	0.811	0.778	3.07719e-13	0.959309
c_02.csv	Dclk1	1.22864e-17	-0.340714	0.985	0.976	3.25553e-13	0.990863
c_02.csv	Lrmda	1.34635e-17	-0.666217	0.396	0.568	3.56742e-13	1.43434
c_02.csv	Tcerg1l	1.34762e-17	-0.298591	0.017	0.181	3.57078e-13	10.6471
c_02.csv	Prkg2	1.35274e-17	-0.300145	0.07	0.256	3.58435e-13	3.65714
c_02.csv	Syn3	1.37051e-17	0.343087	0.908	0.876	3.63144e-13	0.964758
c_02.csv	Chrna7	1.41997e-17	-0.384179	0.277	0.5	3.76249e-13	1.80505
c_02.csv	Nr3c1	1.45447e-17	-0.325664	0.158	0.367	3.85392e-13	2.32278
c_02.csv	Plcxd3	1.4703e-17	-0.460946	0.799	0.872	3.89585e-13	1.09136
c_02.csv	Cdk14	1.5456e-17	0.278632	0.995	0.96	4.09538e-13	0.964824
c_02.csv	Zkscan16	1.6171e-17	0.379572	0.646	0.534	4.28483e-13	0.826625
c_02.csv	Galnt18	1.80034e-17	-0.624826	0.218	0.416	4.77037e-13	1.90826
c_02.csv	Prkg1	2.087e-17	-0.440687	0.976	0.965	5.52992e-13	0.98873
c_02.csv	Tmcc3	2.32779e-17	-0.783777	0.49	0.651	6.16795e-13	1.32857
c_02.csv	Kcnk13	2.70269e-17	-0.350703	0.027	0.192	7.16131e-13	7.11111
c_02.csv	4933406F09Rik	2.71041e-17	0.322873	0.461	0.324	7.18178e-13	0.70282
c_02.csv	Dnah9	2.80067e-17	0.319809	0.575	0.42	7.42093e-13	0.730435
c_02.csv	Frmd5	2.80602e-17	-0.747801	0.522	0.687	7.43512e-13	1.31609
c_02.csv	Gm21798	2.81559e-17	-0.292111	0.041	0.215	7.46046e-13	5.2439
c_02.csv	Fxyd6	3.0405e-17	0.26857	0.471	0.305	8.05641e-13	0.647558
c_02.csv	Nxn	3.16981e-17	0.395818	0.631	0.496	8.39904e-13	0.786054
c_02.csv	Ralgapa2	4.42915e-17	0.272827	0.925	0.882	1.17359e-12	0.953514
c_02.csv	Gm46102	5.3583e-17	-0.300713	0.063	0.241	1.41979e-12	3.8254
c_02.csv	Tox3	5.39951e-17	0.352822	0.847	0.709	1.43071e-12	0.837072
c_02.csv	Inpp5a	5.42565e-17	-0.276469	0.381	0.612	1.43764e-12	1.6063
c_02.csv	Ptpn3	6.66745e-17	-0.266517	0.063	0.245	1.76668e-12	3.88889
c_02.csv	Cers6	8.77418e-17	-0.34936	0.556	0.758	2.32489e-12	1.36331
c_02.csv	Slc4a3	9.44227e-17	-0.279513	0.383	0.62	2.50192e-12	1.6188
c_02.csv	Cacna1g	1.02611e-16	-0.304051	0.34	0.562	2.71889e-12	1.65294
c_02.csv	Cacng4	1.08205e-16	0.292927	0.553	0.395	2.8671e-12	0.714286
c_02.csv	Eef2k	1.09101e-16	0.367059	0.568	0.472	2.89086e-12	0.830986
c_02.csv	Lysmd4	1.45399e-16	-0.27905	0.468	0.708	3.85263e-12	1.51282
c_02.csv	Me3	1.50516e-16	-0.410538	0.692	0.797	3.98821e-12	1.15173
c_02.csv	Inpp5f	1.53125e-16	-0.266784	0.284	0.521	4.05736e-12	1.83451
c_02.csv	Rgs20	1.59302e-16	0.384106	0.791	0.713	4.22102e-12	0.901391
c_02.csv	Lclat1	2.45175e-16	-0.290656	0.5	0.71	6.49641e-12	1.42
c_02.csv	Lingo2	2.47827e-16	-0.654918	0.949	0.935	6.56668e-12	0.985248
c_02.csv	Kcnmb2	2.78506e-16	-0.462519	0.136	0.33	7.37956e-12	2.42647
c_02.csv	Cald1	3.55703e-16	-0.325562	0.085	0.269	9.42506e-12	3.16471
c_02.csv	Kctd8	3.75138e-16	-0.730637	0.058	0.224	9.94002e-12	3.86207
c_02.csv	Adamts10	4.16357e-16	0.362436	0.522	0.402	1.10322e-11	0.770115
c_02.csv	Fstl4	4.47845e-16	-0.553619	0.034	0.191	1.18665e-11	5.61765
c_02.csv	Frmd4b	4.9062e-16	-0.72598	0.786	0.785	1.29999e-11	0.998728
c_02.csv	Ablim3	8.37312e-16	0.287421	0.823	0.75	2.21863e-11	0.9113
c_02.csv	Mtcl1	8.7446e-16	-0.278325	0.367	0.587	2.31706e-11	1.59946
c_02.csv	Kcnq3	1.06584e-15	-0.404207	0.954	0.941	2.82416e-11	0.986373
c_02.csv	Grin2a	1.14642e-15	-0.817828	0.896	0.847	3.03767e-11	0.945312
c_02.csv	Cmip	1.14743e-15	0.264119	0.959	0.94	3.04034e-11	0.980188
c_02.csv	Ldb2	1.15353e-15	-0.721252	0.386	0.552	3.05651e-11	1.43005
c_02.csv	Gpr158	1.73002e-15	-0.391041	0.995	0.979	4.58402e-11	0.98392
c_02.csv	Dpysl5	1.85404e-15	0.287592	0.828	0.755	4.91265e-11	0.911836
c_02.csv	Diaph2	1.90906e-15	0.369812	0.862	0.813	5.05843e-11	0.943155
c_02.csv	Lrrn3	2.09579e-15	-0.292697	0.364	0.584	5.55322e-11	1.6044
c_02.csv	Cdh4	2.17365e-15	-0.335717	0.566	0.766	5.75952e-11	1.35336
c_02.csv	Stxbp5	2.17554e-15	-0.297168	0.624	0.79	5.76453e-11	1.26603
c_02.csv	Gnb4	2.44437e-15	-0.274774	0.133	0.322	6.47686e-11	2.42105
c_02.csv	Gm26905	2.46783e-15	-0.53193	0.876	0.849	6.53901e-11	0.969178
c_02.csv	Cacng3	2.60652e-15	0.435852	0.68	0.589	6.90651e-11	0.866176
c_02.csv	Pde11a	2.63016e-15	-0.539968	0.138	0.316	6.96913e-11	2.28986
c_02.csv	Ddx17	2.70743e-15	-0.256532	0.811	0.896	7.17389e-11	1.10481
c_02.csv	Begain	2.89799e-15	-0.32058	0.529	0.707	7.6788e-11	1.33648
c_02.csv	Gm26883	3.1709e-15	-0.389387	0.024	0.17	8.40192e-11	7.08333
c_02.csv	Ptprt	3.53717e-15	-1.02912	0.201	0.382	9.37245e-11	1.9005
c_02.csv	Khdrbs3	3.59382e-15	-0.492414	0.451	0.644	9.52256e-11	1.42794
c_02.csv	Phldb2	3.71843e-15	-0.425773	0.257	0.449	9.85272e-11	1.74708
c_02.csv	Ptar1	3.74432e-15	-0.253366	0.248	0.452	9.92131e-11	1.82258
c_02.csv	Zfp516	4.17511e-15	0.251852	0.371	0.226	1.10628e-10	0.609164
c_02.csv	Ankrd34b	5.01233e-15	0.32292	0.466	0.341	1.32812e-10	0.73176
c_02.csv	Myo16	5.45928e-15	-0.463813	0.194	0.376	1.44654e-10	1.93814
c_02.csv	C530008M17Rik	5.55774e-15	0.264101	0.74	0.574	1.47263e-10	0.775676
c_02.csv	Lrfn2	6.20588e-15	-0.372481	0.248	0.443	1.64437e-10	1.78629
c_02.csv	Bdnf	6.43996e-15	-0.268458	0.126	0.313	1.7064e-10	2.48413
c_02.csv	Spag5	6.85925e-15	-0.442462	0.583	0.756	1.81749e-10	1.29674
c_02.csv	Mmp16	7.21988e-15	-0.338806	0.939	0.945	1.91305e-10	1.00639
c_02.csv	Pcsk6	8.249e-15	-0.331352	0.078	0.243	2.18574e-10	3.11538
c_02.csv	Grm5	8.99637e-15	-0.629519	0.961	0.907	2.38377e-10	0.943809
c_02.csv	Rftn1	1.01846e-14	-0.283948	0.044	0.195	2.69861e-10	4.43182
c_02.csv	Peg3	1.04826e-14	-0.298424	0.951	0.967	2.77758e-10	1.01682
c_02.csv	Kif16b	1.16923e-14	0.327701	0.757	0.714	3.09812e-10	0.943197
c_02.csv	Slc16a11	1.26845e-14	0.317559	0.437	0.302	3.36101e-10	0.691076
c_02.csv	Ptprd	1.4527e-14	-0.868241	0.976	0.976	3.84923e-10	1
c_02.csv	Parp4	1.54245e-14	0.272385	0.245	0.13	4.08703e-10	0.530612
c_02.csv	Atp8a2	2.4611e-14	0.250662	0.949	0.912	6.52116e-10	0.961012
c_02.csv	Rab27b	2.74836e-14	-0.294797	0.488	0.686	7.28232e-10	1.40574
c_02.csv	Sdk2	2.88429e-14	-0.271114	0.167	0.361	7.64249e-10	2.16168
c_02.csv	Pkp4	2.91608e-14	-0.291815	0.869	0.91	7.72675e-10	1.04718
c_02.csv	Gulp1	3.01695e-14	-0.292691	0.075	0.239	7.994e-10	3.18667
c_02.csv	Smarca1	3.27871e-14	0.29558	0.779	0.71	8.6876e-10	0.911425
c_02.csv	Sh3pxd2b	3.36071e-14	0.28192	0.35	0.226	8.90487e-10	0.645714
c_02.csv	Mfsd6	3.47967e-14	-0.282653	0.534	0.725	9.22009e-10	1.35768
c_02.csv	Tlk1	3.50689e-14	0.31886	0.818	0.768	9.2922e-10	0.938875
c_02.csv	Dtnb	3.68222e-14	-0.263133	0.879	0.922	9.75678e-10	1.04892
c_02.csv	Lmo3	3.82584e-14	-0.690516	0.398	0.555	1.01373e-09	1.39447
c_02.csv	Sorcs1	3.97836e-14	-1.03085	0.311	0.48	1.05415e-09	1.54341
c_02.csv	Lmx1a	4.16112e-14	0.261102	0.682	0.489	1.10257e-09	0.717009
c_02.csv	Rictor	4.75909e-14	0.310234	0.779	0.739	1.26102e-09	0.948652
c_02.csv	Gm48742	5.90336e-14	0.406587	0.609	0.516	1.56421e-09	0.847291
c_02.csv	Slc35f4	5.94819e-14	-0.480746	0.633	0.709	1.57609e-09	1.12006
c_02.csv	Foxp1	6.41673e-14	-0.333608	0.573	0.774	1.70024e-09	1.35079
c_02.csv	Slc9a7	6.85949e-14	0.284148	0.818	0.8	1.81756e-09	0.977995
c_02.csv	Ppp2r5c	6.86178e-14	-0.26766	0.59	0.781	1.81817e-09	1.32373
c_02.csv	Gpr137c	7.35847e-14	0.441076	0.748	0.656	1.94977e-09	0.877005
c_02.csv	Bckdhb	7.4217e-14	-0.279609	0.515	0.701	1.96653e-09	1.36117
c_02.csv	Nxph1	7.68553e-14	-0.455599	0.636	0.448	2.03643e-09	0.704403
c_02.csv	Dock1	7.74546e-14	-0.256286	0.073	0.233	2.05232e-09	3.19178
c_02.csv	Sclt1	8.03756e-14	0.281765	0.9	0.882	2.12971e-09	0.98
c_02.csv	Zfp280d	1.12988e-13	0.299866	0.908	0.872	2.99384e-09	0.960352
c_02.csv	Tln2	1.15512e-13	-0.285587	0.607	0.783	3.06073e-09	1.28995
c_02.csv	Pou3f2	1.31315e-13	-0.300284	0.235	0.418	3.47946e-09	1.77872
c_02.csv	Hecw2	1.35906e-13	0.284376	0.961	0.918	3.60109e-09	0.955255
c_02.csv	March11	1.37614e-13	-0.369674	0.408	0.599	3.64635e-09	1.46814
c_02.csv	Gaa	1.98295e-13	0.297962	0.76	0.717	5.25422e-09	0.943421
c_02.csv	Comt	2.12288e-13	0.307278	0.704	0.669	5.62501e-09	0.950284
c_02.csv	Sntg2	2.53465e-13	-0.650455	0.075	0.222	6.71606e-09	2.96
c_02.csv	Dlgap3	2.7111e-13	-0.285131	0.505	0.674	7.1836e-09	1.33465
c_02.csv	Arhgef28	3.19163e-13	0.275752	0.786	0.707	8.45686e-09	0.899491
c_02.csv	Cdh10	3.2512e-13	0.268776	0.91	0.833	8.61471e-09	0.915385
c_02.csv	Tmem108	3.33708e-13	-0.344478	0.808	0.897	8.84227e-09	1.11015
c_02.csv	Pdzd2	3.51346e-13	-0.320286	0.16	0.335	9.30961e-09	2.09375
c_02.csv	Fhod3	3.74366e-13	0.288658	0.806	0.754	9.91958e-09	0.935484
c_02.csv	En1	4.23414e-13	0.273039	0.748	0.613	1.12192e-08	0.819519
c_02.csv	Dpf3	4.59191e-13	0.296082	0.393	0.26	1.21672e-08	0.661578
c_02.csv	Rnf112	4.60374e-13	-0.280602	0.284	0.48	1.21985e-08	1.69014
c_02.csv	Zfpm2	4.74642e-13	-0.583955	0.073	0.219	1.25766e-08	3
c_02.csv	Nol4	4.98788e-13	-0.299675	0.852	0.91	1.32164e-08	1.06808
c_02.csv	Vwa5b2	5.02544e-13	0.308394	0.716	0.653	1.33159e-08	0.912011
c_02.csv	Runx2	5.0596e-13	-0.277116	0.34	0.542	1.34064e-08	1.59412
c_02.csv	Sntb1	5.30349e-13	-0.407142	0.119	0.279	1.40526e-08	2.34454
c_02.csv	Pcdh7	5.43941e-13	-0.816142	0.917	0.903	1.44128e-08	0.984733
c_02.csv	2610037D02Rik	6.50323e-13	0.43986	0.76	0.745	1.72316e-08	0.980263
c_02.csv	Bclaf3	6.86411e-13	-0.266778	0.442	0.632	1.81878e-08	1.42986
c_02.csv	Bcl11b	6.90603e-13	-0.25034	0.056	0.197	1.82989e-08	3.51786
c_02.csv	Cobl	6.99686e-13	-0.359032	0.451	0.622	1.85396e-08	1.37916
c_02.csv	Homer1	7.16855e-13	-0.272001	0.408	0.616	1.89945e-08	1.5098
c_02.csv	Klhl29	7.19839e-13	0.295231	0.954	0.892	1.90736e-08	0.93501
c_02.csv	Tusc3	9.47998e-13	0.259385	0.791	0.759	2.51191e-08	0.959545
c_02.csv	Nap1l5	9.59756e-13	0.253274	0.803	0.754	2.54307e-08	0.938979
c_02.csv	Gpm6b	1.10843e-12	-0.366904	0.488	0.678	2.93701e-08	1.38934
c_02.csv	Asap1	1.14755e-12	-0.378632	0.694	0.805	3.04067e-08	1.15994
c_02.csv	Kidins220	1.14872e-12	-0.267352	0.915	0.946	3.04378e-08	1.03388
c_02.csv	Rgs7	1.17661e-12	-0.262521	0.99	0.974	3.11765e-08	0.983838
c_02.csv	Neurl1a	1.25926e-12	0.323764	0.587	0.511	3.33665e-08	0.870528
c_02.csv	Gabra2	1.38837e-12	-0.693894	0.447	0.602	3.67876e-08	1.34676
c_02.csv	Mad1l1	2.28348e-12	-0.464081	0.711	0.828	6.05054e-08	1.16456
c_02.csv	Zcchc18	2.51145e-12	0.25612	0.917	0.906	6.65459e-08	0.988004
c_02.csv	Cab39l	2.60161e-12	0.358148	0.704	0.662	6.89349e-08	0.940341
c_02.csv	Smoc1	2.67813e-12	0.25912	0.415	0.292	7.09624e-08	0.703614
c_02.csv	Slc18a2	2.80149e-12	0.252003	0.988	0.885	7.4231e-08	0.895749
c_02.csv	Syt7	3.14426e-12	-0.319098	0.624	0.768	8.33134e-08	1.23077
c_02.csv	Trpc6	3.33079e-12	-0.617623	0.614	0.684	8.82559e-08	1.11401
c_02.csv	Gm1976	3.40352e-12	-0.266041	0.551	0.735	9.0183e-08	1.33394
c_02.csv	Gm12239	3.91663e-12	-0.317916	0.068	0.208	1.03779e-07	3.05882
c_02.csv	Plcxd2	4.09016e-12	-0.251037	0.323	0.506	1.08377e-07	1.56656
c_02.csv	Zfp536	4.98547e-12	-0.527827	0.09	0.233	1.321e-07	2.58889
c_02.csv	Nlk	5.03509e-12	-0.294611	0.833	0.895	1.33415e-07	1.07443
c_02.csv	Arl6ip1	6.13359e-12	0.31015	0.675	0.642	1.62522e-07	0.951111
c_02.csv	Apba2	6.3091e-12	-0.320591	0.617	0.75	1.67172e-07	1.21556
c_02.csv	Spag16	7.19166e-12	-0.279108	0.112	0.264	1.90557e-07	2.35714
c_02.csv	Ptprk	7.28029e-12	-0.638558	0.5	0.639	1.92906e-07	1.278
c_02.csv	Plxnc1	8.41231e-12	-0.328411	0.34	0.512	2.22901e-07	1.50588
c_02.csv	Fut9	8.47465e-12	-0.334077	0.519	0.699	2.24553e-07	1.34682
c_02.csv	Ell2	9.18782e-12	-0.271442	0.155	0.324	2.4345e-07	2.09032
c_02.csv	Map3k5	9.20431e-12	-0.258935	0.354	0.553	2.43887e-07	1.56215
c_02.csv	Slc7a14	9.29908e-12	-0.33924	0.206	0.365	2.46398e-07	1.77184
c_02.csv	Adam23	1.30473e-11	-0.274223	0.808	0.89	3.45715e-07	1.10149
c_02.csv	Socs2	1.32219e-11	-0.258502	0.325	0.507	3.5034e-07	1.56
c_02.csv	Cdc7	1.34285e-11	0.291229	0.527	0.434	3.55815e-07	0.823529
c_02.csv	Ntrk3	2.00578e-11	-0.39986	0.891	0.894	5.31471e-07	1.00337
c_02.csv	Sel1l	2.22785e-11	0.290617	0.718	0.706	5.90313e-07	0.983287
c_02.csv	Cntln	2.9854e-11	0.285448	0.777	0.748	7.91041e-07	0.962677
c_02.csv	Ctnna3	3.03384e-11	-0.50145	0.828	0.835	8.03877e-07	1.00845
c_02.csv	Ust	3.6746e-11	-0.304939	0.039	0.158	9.73659e-07	4.05128
c_02.csv	Mat2a	3.94839e-11	-0.251051	0.587	0.773	1.0462e-06	1.31687
c_02.csv	Sgpp2	4.59803e-11	0.296501	0.449	0.344	1.21834e-06	0.766147
c_02.csv	Tspan33	5.93983e-11	0.265701	0.488	0.392	1.57388e-06	0.803279
c_02.csv	Pcsk2	6.4246e-11	0.264772	0.908	0.87	1.70233e-06	0.95815
c_02.csv	2810032G03Rik	8.16594e-11	0.285598	0.403	0.307	2.16373e-06	0.761787
c_02.csv	Ldhb	1.04857e-10	-0.278024	0.49	0.667	2.77838e-06	1.36122
c_02.csv	Sh3d19	1.28283e-10	-0.280489	0.507	0.693	3.39912e-06	1.36686
c_02.csv	5031425E22Rik	1.29843e-10	-0.269757	0.701	0.812	3.44046e-06	1.15835
c_02.csv	Tmem196	1.40147e-10	0.308088	0.697	0.634	3.71348e-06	0.909613
c_02.csv	Gmds	1.50571e-10	-0.26306	0.879	0.931	3.98967e-06	1.05916
c_02.csv	Sox5	1.52916e-10	-0.595312	0.092	0.219	4.05182e-06	2.38043
c_02.csv	Mgat5	1.62967e-10	-0.318501	0.471	0.645	4.31814e-06	1.36943
c_02.csv	Arhgap24	1.92066e-10	-0.303811	0.393	0.576	5.08918e-06	1.46565
c_02.csv	B3gat2	2.34008e-10	0.32534	0.367	0.273	6.20051e-06	0.743869
c_02.csv	Tmem130	3.30199e-10	0.260354	0.806	0.797	8.74927e-06	0.988834
c_02.csv	Uck2	3.51593e-10	0.282442	0.432	0.342	9.31617e-06	0.791667
c_02.csv	9530059O14Rik	3.51728e-10	-0.535949	0.891	0.825	9.31974e-06	0.925926
c_02.csv	Kalrn	3.71358e-10	-0.318567	0.942	0.953	9.83988e-06	1.01168
c_02.csv	Plppr5	4.21027e-10	0.285416	0.629	0.572	1.11559e-05	0.90938
c_02.csv	Rapgef5	4.44325e-10	-0.319674	0.731	0.791	1.17733e-05	1.08208
c_02.csv	Cacna1a	5.13043e-10	-0.273805	0.998	0.982	1.35941e-05	0.983968
c_02.csv	Lyst	6.83026e-10	-0.273657	0.731	0.81	1.80981e-05	1.10807
c_02.csv	Gm2237	7.18827e-10	0.333462	0.359	0.265	1.90468e-05	0.738162
c_02.csv	Ints6l	8.11964e-10	0.257943	0.646	0.609	2.15146e-05	0.942724
c_02.csv	Glud1	9.59987e-10	-0.250971	0.648	0.77	2.54368e-05	1.18827
c_02.csv	Ano3	9.84735e-10	-0.308949	0.233	0.388	2.60925e-05	1.66524
c_02.csv	Prrc2c	1.05894e-09	-0.305019	0.823	0.916	2.80587e-05	1.113
c_02.csv	Adam12	1.49547e-09	-0.291086	0.153	0.299	3.96255e-05	1.95425
c_02.csv	Sp4	1.60943e-09	0.279342	0.638	0.602	4.26452e-05	0.943574
c_02.csv	Gad1	1.75825e-09	-0.373874	0.075	0.196	4.65883e-05	2.61333
c_02.csv	Tex2	1.86733e-09	0.27921	0.636	0.617	4.94786e-05	0.970126
c_02.csv	Chrm3	1.93251e-09	-0.793636	0.299	0.427	5.12056e-05	1.42809
c_02.csv	Meis2	1.97316e-09	-0.75033	0.022	0.116	5.22828e-05	5.27273
c_02.csv	Gng4	2.06474e-09	0.274555	0.49	0.415	5.47095e-05	0.846939
c_02.csv	Fzd3	2.2639e-09	0.26503	0.551	0.486	5.99866e-05	0.882033
c_02.csv	Arpp21	2.32368e-09	-0.886115	0.286	0.416	6.15707e-05	1.45455
c_02.csv	Lrrtm3	2.44091e-09	-0.433816	0.777	0.788	6.46767e-05	1.01416
c_02.csv	Cux2	2.5225e-09	-0.262152	0.67	0.747	6.68387e-05	1.11493
c_02.csv	Glra3	2.773e-09	0.318096	0.704	0.615	7.34763e-05	0.87358
c_02.csv	Xpr1	2.9712e-09	-0.261821	0.609	0.754	7.8728e-05	1.2381
c_02.csv	Fras1	3.4741e-09	-0.533338	0.228	0.35	9.20532e-05	1.53509
c_02.csv	Mid2	3.7494e-09	0.282571	0.541	0.48	9.93478e-05	0.887246
c_02.csv	Aff2	3.76654e-09	-0.44014	0.568	0.696	9.9802e-05	1.22535
c_02.csv	Gabrg2	4.81569e-09	0.253864	0.701	0.661	0.000127601	0.942939
c_02.csv	Gabra3	5.45774e-09	-0.261575	0.578	0.708	0.000144614	1.22491
c_02.csv	Prkca	6.1862e-09	-0.52336	0.983	0.939	0.000163916	0.955239
c_02.csv	Ezh2	6.20932e-09	0.256997	0.333	0.241	0.000164528	0.723724
c_02.csv	Cep250	6.66895e-09	0.261734	0.524	0.475	0.000176707	0.906489
c_02.csv	Gad2	9.9614e-09	-0.598513	0.129	0.245	0.000263947	1.89922
c_02.csv	Ccdc82	1.27475e-08	0.262508	0.558	0.489	0.000337771	0.876344
c_02.csv	Mta3	1.30135e-08	0.281716	0.738	0.746	0.000344819	1.01084
c_02.csv	Slc4a7	1.77424e-08	0.283325	0.663	0.647	0.000470121	0.975867
c_02.csv	L3mbtl4	1.90061e-08	-0.271146	0.201	0.337	0.000503604	1.67662
c_02.csv	Zeb2	2.08041e-08	-0.661587	0.061	0.159	0.000551246	2.60656
c_02.csv	D3Ertd751e	2.25092e-08	0.293476	0.706	0.702	0.000596427	0.994334
c_02.csv	Zc3h12b	2.55052e-08	0.277482	0.796	0.771	0.000675812	0.968593
c_02.csv	Ptpn5	2.60771e-08	-0.429121	0.76	0.813	0.000690964	1.06974
c_02.csv	Pou6f2	3.21324e-08	-0.596353	0.126	0.238	0.000851414	1.88889
c_02.csv	Reln	3.7479e-08	-0.288557	0.029	0.116	0.00099308	4
c_02.csv	Flnb	3.86403e-08	0.251812	0.774	0.767	0.00102385	0.990956
c_02.csv	Robo2	5.96317e-08	-0.35589	0.988	0.918	0.00158006	0.92915
c_02.csv	Satb2	6.59702e-08	-0.400481	0.024	0.105	0.00174801	4.375
c_02.csv	Cntnap4	7.39631e-08	-0.347661	0.968	0.895	0.0019598	0.924587
c_02.csv	Etv1	9.93977e-08	-0.304555	0.148	0.265	0.00263374	1.79054
c_02.csv	Arl15	1.29508e-07	-0.321734	0.833	0.883	0.00343157	1.06002
c_02.csv	Nkain1	1.88643e-07	0.273205	0.417	0.359	0.00499847	0.860911
c_02.csv	Bnc2	2.17649e-07	-0.414314	0.65	0.656	0.00576703	1.00923
c_02.csv	Ptpru	5.03976e-07	-0.280684	0.699	0.722	0.0133539	1.0329
c_02.csv	Cpe	5.81091e-07	-0.259082	0.867	0.904	0.0153972	1.04268
c_02.csv	Htr2c	1.00457e-06	-0.321794	0.522	0.389	0.0266182	0.745211
c_02.csv	Cacna2d1	1.04219e-06	-0.422821	0.939	0.909	0.0276149	0.968051
c_02.csv	Slc4a4	1.0528e-06	-0.270951	0.085	0.18	0.027896	2.11765
c_02.csv	Ptchd4	1.06402e-06	-0.353106	0.265	0.373	0.0281934	1.40755
c_02.csv	Gm28928	1.53196e-06	-0.895012	0.08	0.17	0.0405924	2.125
c_02.csv	Crim1	4.46833e-06	-0.317051	0.471	0.578	0.118397	1.22718
c_02.csv	Ebf2	8.32357e-06	-0.437868	0.056	0.126	0.22055	2.25
c_02.csv	Tmem59l	9.90412e-06	0.254508	0.476	0.431	0.26243	0.905462
c_02.csv	Kcnj6	1.37131e-05	-0.656869	0.947	0.904	0.363356	0.954593
c_02.csv	D030068K23Rik	1.62059e-05	0.323583	0.451	0.391	0.429407	0.866962
c_02.csv	Kctd16	1.76566e-05	-1.06456	0.284	0.358	0.467846	1.26056
c_02.csv	Megf11	2.54141e-05	-0.32201	0.075	0.148	0.673397	1.97333
c_02.csv	Rfx3	5.12985e-05	-0.359556	0.653	0.76	1	1.16386
c_02.csv	Slc35f1	7.91126e-05	-0.369885	0.956	0.895	1	0.936192
c_02.csv	Xirp2	8.77507e-05	-0.491864	0.044	0.103	1	2.34091
c_02.csv	Sgcz	9.48783e-05	-0.549884	0.985	0.92	1	0.93401
c_02.csv	Cdh2	0.0001084	-0.314705	0.835	0.852	1	1.02036
c_02.csv	Elmo1	0.000117381	-0.308725	0.553	0.66	1	1.19349
c_02.csv	Stxbp5l	0.000123116	-0.3066	0.837	0.86	1	1.02748
c_02.csv	Grip2	0.00014371	-0.250664	0.762	0.742	1	0.973753
c_02.csv	Nos1ap	0.000200676	-0.33705	0.93	0.855	1	0.919355
c_02.csv	Synpr	0.000366242	-0.320817	0.087	0.149	1	1.71264
c_02.csv	Maml3	0.000417865	-0.25812	0.811	0.84	1	1.03576
c_02.csv	Tenm4	0.000445641	-0.479607	0.774	0.795	1	1.02713
c_02.csv	Satb1	0.000472759	-0.255153	0.636	0.652	1	1.02516
c_02.csv	Grid2	0.000740298	-0.337596	0.905	0.82	1	0.906077
c_02.csv	Tmtc2	0.00081086	-0.381851	0.614	0.644	1	1.04886
c_02.csv	Sema5b	0.000922088	-0.371529	0.17	0.236	1	1.38824
c_02.csv	Msi2	0.00143648	-0.349783	0.998	0.961	1	0.962926
c_02.csv	Gabrg1	0.00174683	-0.364375	0.197	0.257	1	1.30457
c_02.csv	Pcdh9	0.00474338	-0.798182	0.978	0.95	1	0.97137
c_02.csv	Cartpt	0.00594053	-0.2705	0.09	0.137	1	1.52222
c_02.csv	Phactr1	0.00772191	-0.31534	0.925	0.876	1	0.947027
c_02.csv	Fam19a2	0.0177158	-0.688144	0.393	0.413	1	1.05089
c_02.csv	Nav3	0.0186409	-0.271749	0.925	0.9	1	0.972973
c_02.csv	Egfem1	0.0466236	-0.608432	0.502	0.504	1	1.00398
c_02.csv	Cul4b	0.0566938	0.276127	0.367	0.359	1	0.978202
c_02.csv	Edil3	0.0843068	-0.847207	0.371	0.368	1	0.991914
c_02.csv	Nell1	0.107698	-0.412407	0.43	0.454	1	1.05581
c_02.csv	Rnf220	0.128798	-0.315764	0.451	0.528	1	1.17073
c_02.csv	Car10	0.13319	-0.524621	0.449	0.44	1	0.979955
c_02.csv	Npas3	0.142875	-0.541153	0.57	0.576	1	1.01053
c_02.csv	Pcdh11x	0.31755	-0.631394	0.347	0.363	1	1.04611
c_02.csv	Cep112	0.347929	-0.279088	0.352	0.376	1	1.06818
c_02.csv	Tenm2	0.387402	-0.61935	0.998	0.933	1	0.93487
c_02.csv	Tnik	0.498347	-0.356996	0.85	0.78	1	0.917647
c_02.csv	Grik2	0.499803	-0.307928	0.964	0.959	1	0.994813
c_02.csv	Plp1	0.51726	-0.350826	0.257	0.294	1	1.14397
c_02.csv	Necab1	0.666691	-0.25611	0.517	0.5	1	0.967118
c_02.csv	Rorb	0.928895	-0.281021	0.18	0.175	1	0.972222
c_02.csv	Hs3st5	0.944985	-0.375053	0.689	0.684	1	0.992743
c_03.csv	St18	0	3.53484	0.925	0.073	0	0.0789189
c_03.csv	Tmem63a	0	0.981298	0.421	0.008	0	0.0190024
c_03.csv	1700047M11Rik	0	1.19887	0.556	0.009	0	0.0161871
c_03.csv	Prr5l	0	3.18691	0.902	0.031	0	0.0343681
c_03.csv	Gm13905	0	0.541082	0.278	0.002	0	0.00719424
c_03.csv	Bcas1	0	1.98931	0.759	0.038	0	0.0500659
c_03.csv	Plxnb3	0	0.845513	0.353	0.005	0	0.0141643
c_03.csv	Cldn11	0	1.58613	0.669	0.027	0	0.0403587
c_03.csv	Gjc3	0	2.14231	0.789	0.019	0	0.0240811
c_03.csv	Mag	0	2.32138	0.865	0.028	0	0.0323699
c_03.csv	Folh1	0	0.809828	0.338	0.007	0	0.0207101
c_03.csv	Gm4593	0	1.22453	0.602	0.014	0	0.0232558
c_03.csv	C030029H02Rik	0	1.44536	0.511	0.01	0	0.0195695
c_03.csv	A330049N07Rik	0	1.45862	0.541	0.017	0	0.0314233
c_03.csv	Fa2h	0	1.44173	0.617	0.024	0	0.0388979
c_03.csv	7630403G23Rik	0	0.740999	0.135	0.001	0	0.00740741
c_03.csv	Gm42756	0	0.426578	0.218	0.003	0	0.0137615
c_03.csv	Aspa	0	2.0168	0.797	0.034	0	0.04266
c_03.csv	Ttyh2	0	1.41266	0.654	0.033	0	0.0504587
c_03.csv	Sox10	0	1.19375	0.571	0.02	0	0.0350263
c_03.csv	Sec14l5	0	1.69985	0.677	0.022	0	0.0324963
c_03.csv	AC110241.2	0	1.52807	0.526	0.012	0	0.0228137
c_03.csv	Mog	0	2.21166	0.872	0.038	0	0.043578
c_03.csv	Daam2	0	1.41691	0.669	0.029	0	0.0433483
c_03.csv	Opalin	0	1.06675	0.519	0.013	0	0.0250482
c_03.csv	A230001M10Rik	1.40221e-272	1.54302	0.617	0.037	3.71543e-268	0.0599676
c_03.csv	Mobp	1.53989e-264	1.87238	0.827	0.072	4.08026e-260	0.0870617
c_03.csv	Neat1	1.03814e-262	2.51476	0.895	0.089	2.75075e-258	0.0994413
c_03.csv	Mal	1.92094e-261	2.07147	0.737	0.056	5.0899e-257	0.0759837
c_03.csv	Hhip	5.98102e-253	0.511967	0.271	0.007	1.58479e-248	0.0258303
c_03.csv	Insc	3.16209e-237	0.78071	0.331	0.011	8.37859e-233	0.0332326
c_03.csv	Tmem98	1.69583e-233	0.426154	0.218	0.005	4.49343e-229	0.0229358
c_03.csv	Gm12324	2.07192e-229	0.401843	0.18	0.003	5.48997e-225	0.0166667
c_03.csv	Gm44866	1.00478e-226	0.304026	0.203	0.004	2.66236e-222	0.0197044
c_03.csv	Olfml1	5.59327e-226	0.583637	0.398	0.018	1.48205e-221	0.0452261
c_03.csv	Apod	9.00236e-221	1.76796	0.669	0.054	2.38535e-216	0.0807175
c_03.csv	Hapln2	2.35064e-218	1.3761	0.474	0.026	6.22849e-214	0.0548523
c_03.csv	Abca8a	9.89967e-216	1.17205	0.459	0.025	2.62311e-211	0.0544662
c_03.csv	Gm36855	8.95719e-212	0.310216	0.135	0.002	2.37339e-207	0.0148148
c_03.csv	Bcas1os2	5.54854e-203	0.636982	0.226	0.006	1.4702e-198	0.0265487
c_03.csv	Ugt8a	7.69966e-202	1.59771	0.707	0.067	2.04018e-197	0.0947666
c_03.csv	D7Ertd443e	4.05617e-195	1.03933	0.466	0.028	1.07476e-190	0.0600858
c_03.csv	Tnfaip6	4.57973e-192	1.01127	0.398	0.021	1.21349e-187	0.0527638
c_03.csv	Rasgrp3	1.3606e-183	0.794708	0.293	0.012	3.60519e-179	0.0409556
c_03.csv	Dock5	7.27837e-174	0.906004	0.444	0.029	1.92855e-169	0.0653153
c_03.csv	Cobll1	4.80006e-170	1.01972	0.489	0.035	1.27187e-165	0.0715746
c_03.csv	5033421B08Rik	3.30305e-155	0.735363	0.263	0.011	8.75209e-151	0.0418251
c_03.csv	Ermn	6.05267e-149	1.06304	0.541	0.05	1.60378e-144	0.0924214
c_03.csv	Car14	1.2981e-146	0.409363	0.218	0.008	3.43957e-142	0.0366972
c_03.csv	Cdh19	5.03044e-140	1.31583	0.474	0.041	1.33291e-135	0.0864979
c_03.csv	Ppp1r14a	2.31778e-139	1.08444	0.459	0.038	6.14143e-135	0.0827887
c_03.csv	Zeb2	3.12089e-136	2.44158	0.887	0.155	8.26942e-132	0.174746
c_03.csv	Adamts4	1.74413e-134	0.33941	0.165	0.005	4.62142e-130	0.030303
c_03.csv	Csrp1	7.32343e-131	1.23026	0.632	0.079	1.94049e-126	0.125
c_03.csv	Plp1	2.17785e-130	3.92692	0.992	0.291	5.77065e-126	0.293347
c_03.csv	Pllp	6.73563e-129	1.00592	0.391	0.03	1.78474e-124	0.0767263
c_03.csv	Ninj2	1.087e-128	0.960549	0.368	0.027	2.88021e-124	0.0733696
c_03.csv	Cmtm5	3.19927e-128	0.82379	0.338	0.022	8.4771e-124	0.0650888
c_03.csv	Myrf	4.16732e-128	0.672945	0.368	0.027	1.10421e-123	0.0733696
c_03.csv	Gm48508	2.30218e-125	0.339345	0.226	0.01	6.1001e-121	0.0442478
c_03.csv	Gpr37	3.07724e-123	0.878136	0.444	0.04	8.15377e-119	0.0900901
c_03.csv	Cyp2j12	1.86231e-120	0.529816	0.286	0.017	4.93456e-116	0.0594406
c_03.csv	Galnt6	2.49483e-104	0.435718	0.226	0.012	6.61055e-100	0.0530973
c_03.csv	Mbp	2.0122e-103	3.07406	0.977	0.385	5.33174e-99	0.394063
c_03.csv	Megf10	9.06961e-102	0.890694	0.406	0.04	2.40318e-97	0.0985222
c_03.csv	Il33	1.14287e-101	1.52729	0.519	0.067	3.02825e-97	0.129094
c_03.csv	Pla2g16	3.24607e-101	0.684858	0.361	0.032	8.60111e-97	0.0886427
c_03.csv	Ankub1	3.78772e-100	0.363495	0.293	0.021	1.00363e-95	0.0716724
c_03.csv	Trim59	4.32148e-98	0.742622	0.414	0.043	1.14506e-93	0.103865
c_03.csv	Hepacam	1.19281e-91	1.13896	0.444	0.053	3.1606e-87	0.119369
c_03.csv	Gjb1	3.03185e-90	0.46072	0.188	0.01	8.03349e-86	0.0531915
c_03.csv	Gng11	6.79807e-88	0.77712	0.376	0.039	1.80128e-83	0.103723
c_03.csv	Prox1	3.57197e-87	0.796479	0.383	0.041	9.46464e-83	0.10705
c_03.csv	Adamtsl4	1.70025e-86	0.503344	0.331	0.031	4.50515e-82	0.0936556
c_03.csv	Nkx2-2os	1.95249e-85	0.407265	0.195	0.011	5.17352e-81	0.0564103
c_03.csv	Sh3tc2	5.80187e-84	0.394089	0.195	0.011	1.53732e-79	0.0564103
c_03.csv	Sept4	8.26845e-83	1.81755	0.835	0.247	2.19089e-78	0.295808
c_03.csv	Creb5	1.1316e-82	1.00655	0.579	0.091	2.9984e-78	0.157168
c_03.csv	Inf2	1.2844e-80	0.579843	0.338	0.034	3.40327e-76	0.100592
c_03.csv	Car2	2.17696e-79	1.91812	0.82	0.251	5.76828e-75	0.306098
c_03.csv	Zfp536	1.09221e-78	1.77186	0.842	0.229	2.89403e-74	0.271971
c_03.csv	Enpp2	5.65966e-78	2.09272	0.91	0.378	1.49964e-73	0.415385
c_03.csv	Nfia	3.42417e-77	1.61385	0.797	0.197	9.07303e-73	0.247177
c_03.csv	Clic4	4.02831e-77	0.951219	0.496	0.075	1.06738e-72	0.15121
c_03.csv	Myo1e	2.48539e-76	0.839836	0.346	0.038	6.58553e-72	0.109827
c_03.csv	Gatm	6.70803e-76	1.63657	0.752	0.205	1.77743e-71	0.272606
c_03.csv	Pstpip2	8.35071e-75	1.20587	0.496	0.08	2.21269e-70	0.16129
c_03.csv	S1pr5	8.4852e-75	0.390619	0.173	0.01	2.24832e-70	0.0578035
c_03.csv	Dock10	1.1379e-74	2.48783	0.947	0.458	3.0151e-70	0.483633
c_03.csv	Cryab	4.40422e-74	1.57895	0.684	0.163	1.16699e-69	0.238304
c_03.csv	Gm16168	2.91847e-73	1.91849	0.782	0.235	7.73306e-69	0.300512
c_03.csv	Ppfibp2	5.55132e-72	1.14145	0.511	0.086	1.47093e-67	0.168297
c_03.csv	Prkcq	2.34802e-71	0.585491	0.293	0.029	6.22154e-67	0.0989761
c_03.csv	Kcnj10	4.45382e-71	0.397507	0.248	0.021	1.18013e-66	0.0846774
c_03.csv	Plekhg1	5.81439e-71	1.51037	0.699	0.154	1.54064e-66	0.220315
c_03.csv	Zcchc24	6.63398e-70	0.605896	0.256	0.023	1.75781e-65	0.0898438
c_03.csv	Rassf2	4.27476e-69	0.641326	0.316	0.035	1.13268e-64	0.110759
c_03.csv	Slc13a1	5.82645e-69	0.620546	0.248	0.022	1.54383e-64	0.0887097
c_03.csv	Tmem88b	3.83475e-66	0.653307	0.323	0.038	1.01609e-61	0.117647
c_03.csv	Heg1	5.77126e-66	1.06747	0.376	0.051	1.52921e-61	0.135638
c_03.csv	Ptgds	1.87961e-65	3.28496	0.774	0.262	4.98041e-61	0.338501
c_03.csv	Litaf	2.66626e-65	1.17196	0.669	0.164	7.0648e-61	0.245142
c_03.csv	Pde4b	6.80878e-65	2.11087	0.977	0.907	1.80412e-60	0.928352
c_03.csv	Carns1	1.60123e-64	0.497862	0.248	0.023	4.24277e-60	0.0927419
c_03.csv	Itgb4	5.92318e-64	0.326543	0.165	0.011	1.56946e-59	0.0666667
c_03.csv	Enpp6	1.08028e-62	1.01569	0.241	0.023	2.86243e-58	0.0954357
c_03.csv	Qk	1.30643e-62	2.45777	0.97	0.74	3.46166e-58	0.762887
c_03.csv	Selenop	1.39341e-62	0.76978	0.286	0.031	3.69211e-58	0.108392
c_03.csv	Cdc42ep1	2.85382e-62	0.270292	0.158	0.01	7.56176e-58	0.0632911
c_03.csv	Nipal4	1.00961e-61	0.271469	0.165	0.011	2.67516e-57	0.0666667
c_03.csv	Edil3	1.30348e-61	2.25563	0.895	0.366	3.45383e-57	0.408939
c_03.csv	Pmp22	5.36015e-60	0.338623	0.158	0.01	1.42028e-55	0.0632911
c_03.csv	Serpinb1a	8.45517e-59	0.451279	0.218	0.02	2.24037e-54	0.0917431
c_03.csv	Padi2	1.07871e-58	0.465999	0.233	0.022	2.85827e-54	0.0944206
c_03.csv	Pde8a	1.15837e-57	1.46477	0.677	0.193	3.06933e-53	0.285081
c_03.csv	Slc24a2	2.46738e-57	2.43914	0.955	0.866	6.53781e-53	0.906806
c_03.csv	Pla2g4a	7.89157e-57	0.337732	0.18	0.014	2.09103e-52	0.0777778
c_03.csv	Dock1	9.34572e-57	1.26257	0.744	0.229	2.47633e-52	0.307796
c_03.csv	Sox2	9.96009e-56	0.407113	0.271	0.031	2.63913e-51	0.114391
c_03.csv	Cyp27a1	1.7015e-55	0.272793	0.135	0.008	4.50847e-51	0.0592593
c_03.csv	Gab1	2.50544e-54	1.76223	0.722	0.24	6.63865e-50	0.33241
c_03.csv	Prox1os	3.52244e-54	0.458705	0.173	0.014	9.3334e-50	0.0809249
c_03.csv	Cnp	6.96393e-54	1.37912	0.707	0.226	1.84523e-49	0.319661
c_03.csv	Anln	3.48452e-53	1.06365	0.368	0.06	9.23293e-49	0.163043
c_03.csv	Tubb4a	9.18524e-52	1.7353	0.887	0.506	2.43381e-47	0.570462
c_03.csv	Phldb1	1.95425e-51	1.34202	0.729	0.261	5.17817e-47	0.358025
c_03.csv	Rnf220	2.50268e-51	2.42303	0.857	0.525	6.63135e-47	0.612602
c_03.csv	Plcl1	4.25825e-51	1.90098	0.962	0.817	1.12831e-46	0.849272
c_03.csv	Cdk19	2.5809e-50	1.55881	0.842	0.429	6.83861e-46	0.509501
c_03.csv	Fign	2.98705e-50	0.772179	0.474	0.096	7.91477e-46	0.202532
c_03.csv	Gm12145	7.13059e-50	0.352724	0.105	0.006	1.88939e-45	0.0571429
c_03.csv	Plekhh1	1.15425e-49	1.40783	0.767	0.309	3.05842e-45	0.402868
c_03.csv	Olig2	1.518e-49	0.274619	0.165	0.014	4.02224e-45	0.0848485
c_03.csv	Phlpp1	7.49049e-49	1.64701	0.91	0.789	1.98475e-44	0.867033
c_03.csv	Lpar1	1.06539e-48	0.819473	0.361	0.059	2.82295e-44	0.163435
c_03.csv	Plekhg3	6.17198e-48	0.830996	0.368	0.063	1.63539e-43	0.171196
c_03.csv	Sorbs3	3.51594e-47	0.270223	0.173	0.016	9.31618e-43	0.0924855
c_03.csv	Fnbp1	1.47884e-46	1.4083	0.94	0.869	3.91849e-42	0.924468
c_03.csv	D16Ertd472e	3.67234e-46	0.375939	0.301	0.045	9.73059e-42	0.149502
c_03.csv	Gal3st1	6.70146e-46	0.61356	0.316	0.05	1.77569e-41	0.158228
c_03.csv	Pld1	1.32146e-45	0.743641	0.338	0.056	3.50147e-41	0.16568
c_03.csv	Fth1	9.21575e-45	1.91008	0.947	0.778	2.4419e-40	0.821542
c_03.csv	Frmd5	1.35535e-44	1.81631	0.932	0.684	3.59127e-40	0.733906
c_03.csv	Cd9	1.85215e-44	0.879867	0.346	0.059	4.90764e-40	0.17052
c_03.csv	Gramd3	2.82327e-44	0.522377	0.323	0.053	7.48083e-40	0.164087
c_03.csv	Scd2	3.66039e-42	1.69838	0.857	0.561	9.69892e-38	0.654609
c_03.csv	Sox8	3.49463e-40	0.450354	0.226	0.029	9.25973e-36	0.128319
c_03.csv	Map7	6.32303e-40	1.47474	0.925	0.756	1.67541e-35	0.817297
c_03.csv	Matn4	7.0674e-40	0.373899	0.158	0.015	1.87265e-35	0.0949367
c_03.csv	Tmeff2	1.52572e-39	1.75049	0.97	0.882	4.04269e-35	0.909278
c_03.csv	Plxdc2	2.23586e-39	1.28161	0.842	0.407	5.92435e-35	0.483373
c_03.csv	Olig1	2.8868e-39	0.703768	0.376	0.078	7.64914e-35	0.207447
c_03.csv	Grm3	6.66291e-39	1.69239	0.797	0.459	1.76547e-34	0.57591
c_03.csv	Slc1a3	8.65091e-39	0.569559	0.286	0.047	2.29223e-34	0.164336
c_03.csv	Glul	1.26796e-38	1.34548	0.677	0.27	3.35972e-34	0.398818
c_03.csv	Nfix	1.3377e-38	1.00224	0.511	0.14	3.5445e-34	0.273973
c_03.csv	Tspan2	1.53302e-38	1.12239	0.677	0.265	4.06205e-34	0.391433
c_03.csv	Kctd13	2.99099e-38	1.1485	0.647	0.236	7.92522e-34	0.36476
c_03.csv	Unc5b	8.16868e-38	0.476436	0.248	0.036	2.16445e-33	0.145161
c_03.csv	Ano4	1.00978e-37	1.71496	0.85	0.55	2.67562e-33	0.647059
c_03.csv	Gm816	1.52432e-37	0.280224	0.203	0.026	4.03899e-33	0.128079
c_03.csv	Arhgap23	3.12204e-36	1.40322	0.88	0.666	8.27247e-32	0.756818
c_03.csv	Prrg1	4.59246e-36	0.602683	0.308	0.058	1.21686e-31	0.188312
c_03.csv	Ephb1	2.05804e-35	1.26181	0.797	0.326	5.45319e-31	0.409034
c_03.csv	Qdpr	1.40643e-34	1.14898	0.624	0.246	3.72662e-30	0.394231
c_03.csv	Stxbp6	2.59606e-34	0.897973	0.594	0.19	6.87877e-30	0.319865
c_03.csv	Gpm6b	7.93864e-34	1.50971	0.88	0.675	2.1035e-29	0.767045
c_03.csv	Gm42413	9.34789e-34	0.993841	0.541	0.175	2.47691e-29	0.323475
c_03.csv	Ubb	1.11356e-33	1.36853	0.962	0.915	2.9506e-29	0.951143
c_03.csv	Dscaml1	1.19085e-33	1.49169	0.759	0.321	3.1554e-29	0.422925
c_03.csv	Apoe	1.84875e-33	1.64839	0.632	0.254	4.89864e-29	0.401899
c_03.csv	Rtn4	2.28468e-33	1.33201	0.94	0.921	6.05371e-29	0.979787
c_03.csv	Ppp1r16b	2.71838e-33	1.46286	0.759	0.437	7.2029e-29	0.575758
c_03.csv	Sept7	4.28641e-33	1.40659	0.872	0.766	1.13577e-28	0.87844
c_03.csv	Plekhb1	5.19374e-33	0.509611	0.316	0.064	1.37619e-28	0.202532
c_03.csv	Pcdh9	3.29227e-32	1.2554	0.992	0.95	8.72354e-28	0.957661
c_03.csv	Gm42418	4.07567e-32	1.08843	1	0.999	1.07993e-27	0.999
c_03.csv	Mast3	4.27535e-32	1.1638	0.632	0.252	1.13284e-27	0.398734
c_03.csv	Nkx6-2	6.30917e-32	0.41263	0.211	0.031	1.67174e-27	0.146919
c_03.csv	Elovl7	2.5854e-31	1.09193	0.556	0.21	6.85054e-27	0.377698
c_03.csv	Rtkn2	3.98222e-31	0.33852	0.18	0.024	1.05517e-26	0.133333
c_03.csv	Igsf11	7.90379e-31	0.633176	0.391	0.096	2.09427e-26	0.245524
c_03.csv	Ptn	1.2648e-30	1.21915	0.654	0.268	3.35135e-26	0.409786
c_03.csv	Tsc22d3	3.8646e-30	0.729808	0.361	0.089	1.024e-25	0.246537
c_03.csv	Tspan15	2.64507e-29	0.473582	0.218	0.036	7.00863e-25	0.165138
c_03.csv	St6galnac3	2.8897e-29	1.44803	0.917	0.827	7.65684e-25	0.901854
c_03.csv	Phgdh	4.45731e-29	0.268586	0.248	0.045	1.18105e-24	0.181452
c_03.csv	Lrig3	1.12161e-28	0.251796	0.105	0.01	2.97194e-24	0.0952381
c_03.csv	Bfsp2	2.1733e-28	0.459065	0.173	0.024	5.75859e-24	0.138728
c_03.csv	Aplp1	2.34991e-28	1.43423	0.842	0.649	6.22656e-24	0.770784
c_03.csv	Abtb2	8.19532e-28	0.7559	0.368	0.096	2.17151e-23	0.26087
c_03.csv	Nkd1	1.66546e-27	0.33191	0.165	0.023	4.41298e-23	0.139394
c_03.csv	Mapt	2.22959e-27	0.809726	0.977	0.976	5.90775e-23	0.998976
c_03.csv	Snhg11	3.39887e-27	-0.631763	0.955	0.998	9.00598e-23	1.04503
c_03.csv	Adipor2	3.58788e-27	1.08628	0.722	0.411	9.50681e-23	0.569252
c_03.csv	Stard13	1.36749e-26	0.306568	0.165	0.023	3.62344e-22	0.139394
c_03.csv	Plin3	1.64124e-26	0.309157	0.158	0.022	4.3488e-22	0.139241
c_03.csv	Klhl2	1.818e-26	1.33637	0.82	0.607	4.81715e-22	0.740244
c_03.csv	Clmn	1.85386e-26	0.983111	0.677	0.309	4.91217e-22	0.456425
c_03.csv	Wipf1	2.36486e-26	0.960884	0.534	0.204	6.26618e-22	0.382022
c_03.csv	Arhgef10	6.9689e-26	0.708576	0.526	0.203	1.84655e-21	0.385932
c_03.csv	Fam155a	7.18223e-26	-0.839506	0.82	0.993	1.90308e-21	1.21098
c_03.csv	Synj2	8.87612e-25	0.891457	0.489	0.18	2.35191e-20	0.368098
c_03.csv	Gpr158	1.16773e-24	-0.890176	0.744	0.98	3.09413e-20	1.3172
c_03.csv	Prkd3	1.30419e-24	0.383189	0.301	0.073	3.45572e-20	0.242525
c_03.csv	Pip4k2a	1.61241e-24	1.25843	0.699	0.392	4.27241e-20	0.560801
c_03.csv	Meg3	1.72728e-24	-0.662906	0.985	0.999	4.57678e-20	1.01421
c_03.csv	Gm26916	2.50671e-24	0.402445	0.18	0.03	6.64204e-20	0.166667
c_03.csv	Agbl4	2.93524e-24	-0.787666	0.767	0.981	7.7775e-20	1.27901
c_03.csv	Magi2	4.39689e-24	0.744855	0.977	0.993	1.16504e-19	1.01638
c_03.csv	Mast4	1.0566e-23	1.43013	0.857	0.849	2.79968e-19	0.990665
c_03.csv	Npas3	1.05982e-23	1.09298	0.842	0.575	2.80821e-19	0.682898
c_03.csv	Tmbim1	1.68891e-23	0.567481	0.421	0.137	4.47511e-19	0.325416
c_03.csv	Nfe2l3	2.01116e-23	0.430997	0.323	0.086	5.32896e-19	0.266254
c_03.csv	Hspa8	2.09467e-23	1.32458	0.887	0.784	5.55024e-19	0.883878
c_03.csv	Actb	2.26674e-23	1.35383	0.895	0.836	6.00618e-19	0.934078
c_03.csv	Ptma	3.24562e-23	1.12472	0.707	0.389	8.59991e-19	0.550212
c_03.csv	Dbi	4.78084e-23	0.82406	0.594	0.265	1.26678e-18	0.446128
c_03.csv	Kcnma1	5.19847e-23	-0.74728	0.767	0.985	1.37744e-18	1.28422
c_03.csv	Vmp1	6.91065e-23	1.13114	0.865	0.783	1.83112e-18	0.905202
c_03.csv	Ckb	7.93613e-23	1.26227	0.887	0.801	2.10284e-18	0.903044
c_03.csv	Slc12a2	1.0922e-22	1.05192	0.767	0.503	2.894e-18	0.655802
c_03.csv	Ptprn2	1.42388e-22	-0.674051	0.759	0.98	3.77285e-18	1.29117
c_03.csv	Aldoa	1.63335e-22	1.12745	0.887	0.777	4.32788e-18	0.875986
c_03.csv	Aatk	1.95853e-22	1.0852	0.797	0.602	5.18951e-18	0.755332
c_03.csv	Cntn2	3.25957e-22	1.19641	0.602	0.302	8.6369e-18	0.501661
c_03.csv	Cpm	3.66274e-22	0.385835	0.248	0.057	9.70515e-18	0.229839
c_03.csv	Pls1	4.28141e-22	0.883881	0.549	0.237	1.13445e-17	0.431694
c_03.csv	Dclk1	4.70339e-22	-0.714717	0.759	0.977	1.24626e-17	1.28722
c_03.csv	Sorcs1	5.49125e-22	0.90813	0.812	0.477	1.45502e-17	0.587438
c_03.csv	Cacna1e	6.57863e-22	-0.725292	0.707	0.959	1.74314e-17	1.35644
c_03.csv	Cd82	7.55744e-22	0.320196	0.128	0.018	2.0025e-17	0.140625
c_03.csv	Cacnb2	1.23183e-21	-0.788471	0.744	0.976	3.26399e-17	1.31183
[truncated: 84,806 more rows]
