# Supplementary material for: Transcriptomic atlas of midbrain dopamine neurons uncovers differential vulnerability in a Parkinsonism lesion model
Source: eLife. 2024 Apr 8;12:RP89482. doi: 10.7554/eLife.89482 (PMC11001297; doi:10.7554/eLife.89482)
Supplement: Supplementary file 3. — The list of Allen Mouse Brain Atlas experiments of which images were used in this study. [file elife-89482-supp3.xlsx]

## Sheet: Antibodies
			Primary antibodies
			Name	Host	Product number and manufacturer	Dilution
			Aldh1a1	Rabbit	Abcam ab52492	1:500
			Calb1 D-28K	Rabbit	SWant cb38	1:600
			GFP	Goat	Abcam ab6673	1:600
			Otx2	Goat	R&D Systems AF1979	1:500
			Pdia5	Rabbit	Atlas Antibodies HPA030355	1:400
			RFP	Goat	Sicgen AB8181-200	1:800
			Sox6	Guineapig	A gift from Jonas Muhr group, KI, Sweden	1:800
			Sox6	Rabbit	Abcam Ab30455	1:400
			TH	Rabbit	PelFreeze P40101-0	1:800
			TH	Mouse	Millipore MAB318	1:800
			TH	Sheep	Pelfreeze P06101-0	1:500
			Secondary antibodies
			Target	Host	Product number and manufacturer	Dilution	Conjugate
			Mouse	Donkey	Life technologies A21202	1:400	Alexa Fluor 488
			Mouse	Donkey	Jackson immunoresearch 715-165-151	1:400	Cy3
			Mouse	Donkey	Life technologies A31571	1:400	Alexa Fluor 647
			Rabbit	Donkey	Life technologies A21206	1:400	Alexa Fluor 488
			Rabbit	Donkey	Jackson immunoresearch 711-165-152	1:400	Cy3
			Rabbit	Donkey	Life technologies A31573	1:400	Alexa Fluor 647
			Goat	Donkey	Jackson immunoresearch 705-165-147	1:400	Cy3
			Goat	Donkey	Life technologies A21447	1:400	Alexa Fluor 647
			Sheep	Donkey	Jackson immunoresearch 713-165-147	1:400	Cy3
			Sheep	Donkey	Life technologies A21448	1:400	Alexa Fluor 647
			Guineapig	Donkey	Jackson immunoresearch 706-166-148	1:400	Cy3
			Guineapig	Donkey	Jackson immunoresearch 706-605-148	1:400	Alexa Fluor 647

## Sheet: Allen Mouse Brain Atlas images
			Allen Mouse Brain Atlas images used in the manuscript
			Gene name	Allen Mouse Brain Atlas reference
			Aldh1a1	mouse.brain-map.org/experiment/show/72103809
			Ano2	mouse.brain-map.org/experiment/show/71587834
			Anxa1	mouse.brain-map.org/experiment/show/70813897
			Cartpt	mouse.brain-map.org/experiment/show/72077479
			Cbln4	mouse.brain-map.org/experiment/show/72283804
			Col11a1	mouse.brain-map.org/experiment/show/71064195
			Col23a1	mouse.brain-map.org/experiment/show/73636092
			Cpne2	mouse.brain-map.org/experiment/show/70743844
			Csf2rb2	mouse.brain-map.org/experiment/show/73992937
			Ctgf	mouse.brain-map.org/experiment/show/79556634
			Fezf1	mouse.brain-map.org/experiment/show/72283796
			Gad2	mouse.brain-map.org/experiment/show/79591669
			Grin2c	mouse.brain-map.org/experiment/show/75888748
			Grp	mouse.brain-map.org/experiment/show/1363
			Il16	mouse.brain-map.org/experiment/show/71064290
			Irx2	mouse.brain-map.org/experiment/show/1752
			Kit	mouse.brain-map.org/experiment/show/73520994
			Lhx6	mouse.brain-map.org/experiment/show/635
			Lpl	mouse.brain-map.org/experiment/show/649
			Mlip	mouse.brain-map.org/experiment/show/73931408
			Ndnf	mouse.brain-map.org/experiment/show/72080134
			Npy1r	mouse.brain-map.org/experiment/show/72103807
			Pax6	mouse.brain-map.org/experiment/show/764
			Pcsk6	mouse.brain-map.org/experiment/show/75084491
			Postn	mouse.brain-map.org/experiment/show/77371799
			Prox1	mouse.brain-map.org/experiment/show/73520980
			Rxfp1	mouse.brain-map.org/experiment/show/70562124
			Slc17a6	mouse.brain-map.org/experiment/show/73818754
			Slc17a7	mouse.brain-map.org/experiment/show/75081210
			Spp1	mouse.brain-map.org/experiment/show/75651180
			Synpo2	mouse.brain-map.org/experiment/show/75144656
			Tac1	mouse.brain-map.org/experiment/show/1038
			Vcan	mouse.brain-map.org/experiment/show/73520975
			Vill	mouse.brain-map.org/experiment/show/71015194

## Sheet: ISH_probes
	Probe	Forward	Reverse
	Clic4	TATAACCTTCAACAGCGAAG	CTGGGTAGAGGAGTTTAGAA
	Creb5	CATTCAGAAGCCAAAATGAG	TTTCAACATGGACACTTCAT
	Mmp12	GCTGAAAGGAGTCTGCACAATG	TCATCAGCAGAGAGGCGAAA
	Sprr1a	AAGTGCTATCTAACCATGAG	AGAGTCAACTTTTTAGGTGG
