# Supplementary material for: Transcriptomic atlas of midbrain dopamine neurons uncovers differential vulnerability in a Parkinsonism lesion model
Source: eLife. 2024 Apr 8;12:RP89482. doi: 10.7554/eLife.89482 (PMC11001297; doi:10.7554/eLife.89482)
Supplement: Supplementary file 6. — Statistical comparisons of both vulnerability and resilience module scores across clusters, neighborhoods and territories. [file elife-89482-supp6.xlsx]

## Sheet: readme
the Conover-Iman test (1979) for stochastic dominance and reports the results among multiple pairwise comparisons after a Kruskal-Wallis test for stochastic dominance among k groups (Kruskal and Wallis, 1952).
	CI	the Conover-Iman test
	VUL	Vulnerable
	RES	resilient
	NH	neighborhood
	ML	mostly lesioned
gene selection criteria for modules
		p_val_adj < 0.05 & avg_log2FC > 0.5

## Sheet: UP_genes
UP common in VUL clusters	avglog2FC	UP common in RES clusters	avglog2FC
Kcnj6	1.09649	Kctd8	0.874327
Rgs6	0.967015	Frmd5	0.87152
Lrp1b	0.90959	Atp8a1	0.704372
9530059O14Rik	0.844924	Scg2	0.635804
Lrrc3b	0.797319	C130073E24Rik	0.628934
Nos1ap	0.786904	Dtna	0.626347
Slc6a3	0.76869	Lmx1a	0.606109
Cyyr1	0.679217	Nav3	0.587334
Colgalt2	0.609315	N4bp2	0.444006
Ddc	0.588765	Stambpl1	0.290275
Ripor2	0.583307
Plcb4	0.581899
Fam135b	0.57281
Bnc2	0.570641
Pou3f2	0.568127
Pbx1	0.559369
Klhl1	0.558429
Gpr158	0.550047
1700042O10Rik	0.511209
Vsnl1	0.506216
Rims1	0.498771
Gm45881	0.494134
Erc2	0.489907
Kcnn3	0.489586
Pbx3	0.487792
Macrod2	0.486472
Chrna6	0.483768
Agpat4	0.475991
Grip2	0.466869
Ror1	0.466276
Bsn	0.464487
Gbf1	0.4616
Hecw2	0.443791
Adgrb3	0.442182
Slc18a2	0.408173
Dcc	0.393818
Elavl4	0.39156
Raph1	0.390458
Nav2	0.373998

## Sheet: VUL_clusters_CI
comparisons	P	P.adjusted	chi2	T
1 - 10	0.000120074	0.00012795	20037.1	-3.6731
1 - 11	5.39545e-150	8.74856e-150	20037.1	-26.2431
10 - 11	4.74181e-121	7.30358e-121	20037.1	-23.499
1 - 12	5.88446e-13	6.6929e-13	20037.1	-7.11185
10 - 12	0.000135031	0.00014371	20037.1	-3.64298
11 - 12	1.7737e-79	2.49128e-79	20037.1	18.9097
1 - 13	0	0	20037.1	-60.3465
10 - 13	0	0	20037.1	-59.7339
11 - 13	0	0	20037.1	-45.9084
12 - 13	0	0	20037.1	-54.9311
1 - 14	6.32354e-167	1.04502e-166	20037.1	-27.7293
10 - 14	3.7547e-138	5.99777e-138	20037.1	-25.1546
11 - 14	3.44401e-05	3.68818e-05	20037.1	-3.98082
12 - 14	3.20742e-96	4.69659e-96	20037.1	-20.8746
13 - 14	0	3.61624e-308	20037.1	38.0807
1 - 17	0	0	20037.1	-59.448
10 - 17	0	0	20037.1	-59.0703
11 - 17	0	0	20037.1	-44.7918
12 - 17	0	0	20037.1	-53.7525
13 - 17	3.72255e-14	4.29065e-14	20037.1	7.48419
14 - 17	2.90762e-269	5.79505e-269	20037.1	-35.4893
1 - 19	3.87556e-284	7.86994e-284	20037.1	36.4913
10 - 19	0	0	20037.1	42.1116
11 - 19	0	0	20037.1	72.5048
12 - 19	0	0	20037.1	45.2921
13 - 19	0	0	20037.1	105.891
14 - 19	0	0	20037.1	70.8311
17 - 19	0	0	20037.1	109.52
1 - 2	1.26728e-46	1.6633e-46	20037.1	14.3202
10 - 2	1.53206e-77	2.1414e-77	20037.1	18.6696
11 - 2	0	0	20037.1	43.7321
12 - 2	2.32712e-106	3.49677e-106	20037.1	21.9825
13 - 2	0	0	20037.1	77.2322
14 - 2	0	0	20037.1	44.1286
17 - 2	0	0	20037.1	77.8009
19 - 2	7.5968e-105	1.1336e-104	20037.1	-21.8205
1 - 20	0	0	20037.1	-73.9694
10 - 20	0	0	20037.1	-74.3507
11 - 20	0	0	20037.1	-64.0116
12 - 20	0	0	20037.1	-69.1453
13 - 20	1.22352e-46	1.60832e-46	20037.1	-14.3227
14 - 20	0	0	20037.1	-53.8225
17 - 20	8.65331e-130	1.35218e-129	20037.1	-24.3583
19 - 20	0	0	20037.1	-122.026
2 - 20	0	0	20037.1	-91.5278
1 - 21	0	0	20037.1	-55.3364
10 - 21	0	0	20037.1	-54.401
11 - 21	0	0	20037.1	-39.4433
12 - 21	0	0	20037.1	-49.7122
13 - 21	2.12163e-08	2.33596e-08	20037.1	5.48218
14 - 21	1.44256e-224	2.69423e-224	20037.1	-32.3114
17 - 21	0.114052	0.116487	20037.1	-1.20529
19 - 21	0	0	20037.1	-100.216
2 - 21	0	0	20037.1	-72.0536
20 - 21	1.24029e-87	1.77982e-87	20037.1	19.8902
1 - 22	3.22637e-213	5.92303e-213	20037.1	-31.4581
10 - 22	5.84066e-183	9.95803e-183	20037.1	-29.0711
11 - 22	1.13002e-13	1.29381e-13	20037.1	-7.3366
12 - 22	7.42335e-131	1.16421e-130	20037.1	-24.4613
13 - 22	0	0	20037.1	38.4077
14 - 22	0.0036737	0.00384333	20037.1	-2.6809
17 - 22	7.71815e-278	1.55628e-277	20037.1	36.07
19 - 22	0	0	20037.1	-77.45
2 - 22	0	0	20037.1	-48.7968
20 - 22	0	0	20037.1	55.7352
21 - 22	2.44761e-222	4.53203e-222	20037.1	32.1454
1 - 23	5.45531e-99	8.0291e-99	20037.1	21.1827
10 - 23	4.57579e-141	7.33661e-141	20037.1	25.4265
11 - 23	0	0	20037.1	48.6803
12 - 23	1.96221e-175	3.29974e-175	20037.1	28.4487
13 - 23	0	0	20037.1	79.1638
14 - 23	0	0	20037.1	49.0161
17 - 23	0	0	20037.1	79.2416
19 - 23	1.24309e-33	1.57629e-33	20037.1	-12.0477
2 - 23	1.40874e-15	1.64576e-15	20037.1	7.90392
20 - 23	0	0	20037.1	91.9475
21 - 23	0	0	20037.1	74.4783
22 - 23	0	0	20037.1	53.258
1 - 26	1.3293e-26	1.63738e-26	20037.1	-10.6232
10 - 26	5.4666e-14	6.28403e-14	20037.1	-7.43343
11 - 26	3.38322e-41	4.3738e-41	20037.1	13.4167
12 - 26	4.97073e-05	5.30992e-05	20037.1	-3.89267
13 - 26	0	0	20037.1	48.0724
14 - 26	1.73372e-55	2.31431e-55	20037.1	15.6872
17 - 26	0	0	20037.1	46.1444
19 - 26	0	0	20037.1	-47.4806
2 - 26	2.46137e-136	3.91727e-136	20037.1	-24.9837
20 - 26	0	0	20037.1	61.274
21 - 26	0	0	20037.1	43.1635
22 - 26	2.9363e-78	4.11751e-78	20037.1	18.7589
23 - 26	1.82863e-208	3.31464e-208	20037.1	-31.0943
1 - 27	0	0	20037.1	-61.0239
10 - 27	0	0	20037.1	-60.544
11 - 27	0	0	20037.1	-46.7994
12 - 27	0	0	20037.1	-55.5643
13 - 27	0.124552	0.127061	20037.1	1.15256
14 - 27	0	0	20037.1	-38.4068
17 - 27	2.83986e-11	3.17961e-11	20037.1	-6.55491
19 - 27	0	0	20037.1	-108.058
2 - 27	0	0	20037.1	-78.3871
20 - 27	8.72194e-59	1.17521e-58	20037.1	16.1672
21 - 27	2.60738e-06	2.81676e-06	20037.1	-4.55698
22 - 27	0	0	20037.1	-38.9102
23 - 27	0	0	20037.1	-80.0789
26 - 27	0	0	20037.1	-48.4176
1 - 28	0	0	20037.1	-44.5836
10 - 28	0	0	20037.1	-43.1228
11 - 28	6.37394e-129	9.94197e-129	20037.1	-24.2744
12 - 28	0	4.21605e-308	20037.1	-38.0764
13 - 28	1.72014e-145	2.7683e-145	20037.1	25.8343
14 - 28	1.52833e-67	2.09871e-67	20037.1	-17.379
17 - 28	1.49741e-102	2.22671e-102	20037.1	21.5728
19 - 28	0	0	20037.1	-93.5054
2 - 28	0	0	20037.1	-62.738
20 - 28	0	0	20037.1	43.7267
21 - 28	5.2488e-83	7.45745e-83	20037.1	19.3398
22 - 28	5.53263e-58	7.41993e-58	20037.1	-16.0517
23 - 28	0	0	20037.1	-65.7433
26 - 28	6.44662e-212	1.17846e-211	20037.1	-31.3589
27 - 28	1.24921e-145	2.01418e-145	20037.1	25.847
1 - 29	4.24098e-92	6.15764e-92	20037.1	20.4079
10 - 29	4.53385e-133	7.17581e-133	20037.1	24.6736
11 - 29	0	0	20037.1	48.179
12 - 29	6.03045e-167	9.98503e-167	20037.1	27.7311
13 - 29	0	0	20037.1	79.0328
14 - 29	0	0	20037.1	48.5131
17 - 29	0	0	20037.1	79.1753
19 - 29	7.15368e-40	9.22054e-40	20037.1	-13.1869
2 - 29	1.34857e-12	1.51979e-12	20037.1	6.99628
20 - 29	0	0	20037.1	92.0063
21 - 29	0	0	20037.1	74.2851
22 - 29	0	0	20037.1	52.8155
23 - 29	0.178046	0.179926	20037.1	-0.922856
26 - 29	9.7804e-200	1.73986e-199	20037.1	30.416
27 - 29	0	0	20037.1	79.9794
28 - 29	0	0	20037.1	65.4847
1 - 30	3.71468e-13	4.24182e-13	20037.1	7.17519
10 - 30	9.91557e-33	1.25364e-32	20037.1	11.8743
11 - 30	0	0	20037.1	41.6785
12 - 30	7.37679e-56	9.86245e-56	20037.1	15.7419
13 - 30	0	0	20037.1	81.3635
14 - 30	0	0	20037.1	41.6687
17 - 30	0	0	20037.1	84.3909
19 - 30	2.08931e-258	4.07914e-258	20037.1	-34.7417
2 - 30	2.10197e-20	2.5136e-20	20037.1	-9.19083
20 - 30	0	0	20037.1	99.538
21 - 30	0	0	20037.1	75.0076
22 - 30	0	0	20037.1	47.7495
23 - 30	3.11248e-66	4.24698e-66	20037.1	-17.2031
26 - 30	8.07744e-83	1.14575e-82	20037.1	19.3173
27 - 30	0	0	20037.1	83.4431
28 - 30	0	0	20037.1	65.5549
29 - 30	8.61641e-60	1.16281e-59	20037.1	-16.3107
1 - 31	1.49027e-137	2.37615e-137	20037.1	25.0984
10 - 31	1.02867e-191	1.79289e-191	20037.1	29.7799
11 - 31	0	0	20037.1	55.4608
12 - 31	1.18457e-232	2.24157e-232	20037.1	32.9069
13 - 31	0	0	20037.1	87.4156
14 - 31	0	0	20037.1	55.2501
17 - 31	0	0	20037.1	88.5447
19 - 31	1.97052e-22	2.38289e-22	20037.1	-9.68212
2 - 31	2.58495e-29	3.22557e-29	20037.1	11.1936
20 - 31	0	0	20037.1	101.447
21 - 31	0	0	20037.1	82.3479
22 - 31	0	0	20037.1	60.2468
23 - 31	0.0034138	0.00357577	20037.1	2.70537
26 - 31	3.40171e-269	6.76413e-269	20037.1	35.4847
27 - 31	0	0	20037.1	88.7224
28 - 31	0	0	20037.1	74.0208
29 - 31	0.000110712	0.000118121	20037.1	3.69379
30 - 31	1.89054e-102	2.80648e-102	20037.1	21.5618
1 - 33	3.32629e-131	5.22617e-131	20037.1	24.4948
10 - 33	1.90644e-184	3.26331e-184	20037.1	29.1926
11 - 33	0	0	20037.1	55.076
12 - 33	4.93915e-225	9.26494e-225	20037.1	32.346
13 - 33	0	0	20037.1	87.3101
14 - 33	0	0	20037.1	54.8562
17 - 33	0	0	20037.1	88.5095
19 - 33	2.64034e-26	3.23837e-26	20037.1	-10.5586
2 - 33	5.37368e-26	6.58142e-26	20037.1	10.4914
20 - 33	0	0	20037.1	101.496
21 - 33	0	0	20037.1	82.193
22 - 33	0	0	20037.1	59.9064
23 - 33	0.0230076	0.0238382	20037.1	1.99536
26 - 33	1.8986e-261	3.73217e-261	20037.1	34.9526
27 - 33	0	0	20037.1	88.647
28 - 33	0	0	20037.1	73.8324
29 - 33	0.00142742	0.00150246	20037.1	2.98326
30 - 33	3.56977e-96	5.21829e-96	20037.1	20.8694
31 - 33	0.223415	0.225246	20037.1	-0.760723
1 - 37	1.57635e-75	2.19618e-75	20037.1	18.4169
10 - 37	1.3164e-119	2.02035e-119	20037.1	23.3541
11 - 37	0	0	20037.1	52.1329
12 - 37	1.06552e-156	1.73752e-156	20037.1	26.8409
13 - 37	0	0	20037.1	87.9991
14 - 37	0	0	20037.1	51.6585
17 - 37	0	0	20037.1	90.4841
19 - 37	8.40855e-90	1.21472e-89	20037.1	-20.1432
2 - 37	0.000807009	0.000850471	20037.1	3.15372
20 - 37	0	0	20037.1	104.395
21 - 37	0	0	20037.1	82.1969
22 - 37	0	0	20037.1	57.5424
23 - 37	2.4147e-08	2.64848e-08	20037.1	-5.45922
26 - 37	8.09487e-192	1.41373e-191	20037.1	29.7883
27 - 37	0	0	20037.1	89.8376
28 - 37	0	0	20037.1	73.6708
29 - 37	3.82335e-06	4.12003e-06	20037.1	-4.47582
30 - 37	6.88589e-43	8.95582e-43	20037.1	13.7045
31 - 37	4.66112e-19	5.52785e-19	20037.1	-8.85021
33 - 37	3.14487e-16	3.68901e-16	20037.1	-8.08913
1 - 38	6.07823e-45	7.95343e-45	20037.1	-14.0464
10 - 38	2.72295e-28	3.37819e-28	20037.1	-10.9818
11 - 38	3.17883e-22	3.83329e-22	20037.1	9.63292
12 - 38	9.22545e-14	1.05767e-13	20037.1	-7.36377
13 - 38	0	0	20037.1	44.9637
14 - 38	3.15729e-34	4.0273e-34	20037.1	12.1608
17 - 38	0	0	20037.1	42.7993
19 - 38	0	0	20037.1	-51.4816
2 - 38	4.45653e-177	7.50894e-177	20037.1	-28.5857
20 - 38	0	0	20037.1	58.2893
21 - 38	0	0	20037.1	40.0038
22 - 38	1.43961e-51	1.904e-51	20037.1	15.0976
23 - 38	1.18766e-254	2.3083e-254	20037.1	-34.4797
26 - 38	0.000479369	0.000508296	20037.1	-3.30277
27 - 38	0	0	20037.1	45.2479
28 - 38	1.88953e-167	3.1407e-167	20037.1	27.7742
29 - 38	1.82296e-245	3.51134e-245	20037.1	-33.831
30 - 38	5.56508e-120	8.55631e-120	20037.1	-23.3917
31 - 38	0	0	20037.1	-39.099
33 - 38	0	0	20037.1	-38.589
37 - 38	6.89901e-244	1.3259e-243	20037.1	-33.7185
1 - 39	8.44282e-09	9.30764e-09	20037.1	-5.64313
10 - 39	0.0287132	0.0296073	20037.1	-1.90014
11 - 39	2.60326e-115	3.94614e-115	20037.1	22.9179
12 - 39	0.025824	0.026692	20037.1	1.94615
13 - 39	0	0	20037.1	61.4043
14 - 39	2.2963e-132	3.6211e-132	20037.1	24.6062
17 - 39	0	0	20037.1	61.3067
19 - 39	0	0	20037.1	-46.1122
2 - 39	1.64238e-100	2.42554e-100	20037.1	-21.3502
20 - 39	0	0	20037.1	77.2517
21 - 39	0	0	20037.1	55.6882
22 - 39	1.81598e-180	3.08394e-180	20037.1	28.8664
23 - 39	3.73545e-171	6.2451e-171	20037.1	-28.089
26 - 39	1.17148e-09	1.30148e-09	20037.1	5.97431
27 - 39	0	0	20037.1	62.4545
28 - 39	0	0	20037.1	44.0957
29 - 39	1.73534e-162	2.85684e-162	20037.1	-27.347
30 - 39	2.37165e-49	3.12231e-49	20037.1	-14.754
31 - 39	8.63132e-232	1.62973e-231	20037.1	-32.8439
33 - 39	5.96239e-224	1.11117e-223	20037.1	-32.2656
37 - 39	8.84585e-154	1.43703e-153	20037.1	-26.5821
38 - 39	2.12706e-22	2.56858e-22	20037.1	9.67427
1 - 4	8.15275e-19	9.6422e-19	20037.1	-8.7874
10 - 4	9.1423e-08	9.96395e-08	20037.1	-5.21751
11 - 4	9.61777e-80	1.35752e-79	20037.1	18.9424
12 - 4	0.0911159	0.093172	20037.1	-1.33395
13 - 4	0	0	20037.1	57.6526
14 - 4	8.1629e-97	1.19936e-96	20037.1	20.9411
17 - 4	0	0	20037.1	57.1382
19 - 4	0	0	20037.1	-49.3902
2 - 4	2.32543e-131	3.66031e-131	20037.1	-24.5098
20 - 4	0	0	20037.1	73.3348
21 - 4	0	0	20037.1	51.9753
22 - 4	6.63556e-136	1.0541e-135	20037.1	24.943
23 - 4	4.45377e-207	8.0392e-207	20037.1	-30.9875
26 - 4	0.0023234	0.0024366	20037.1	2.83081
27 - 4	0	0	20037.1	58.5718
28 - 4	0	0	20037.1	39.9583
29 - 4	5.46491e-198	9.70162e-198	20037.1	-30.2785
30 - 4	7.0109e-76	9.78345e-76	20037.1	-18.4613
31 - 4	2.06197e-275	4.14803e-275	20037.1	-35.9066
33 - 4	2.84479e-267	5.64371e-267	20037.1	-35.3533
37 - 4	1.87739e-194	3.31235e-194	20037.1	-29.9985
38 - 4	4.42529e-11	4.94186e-11	20037.1	6.48828
39 - 4	0.000227971	0.000242026	20037.1	-3.50587
1 - 40	0	0	20037.1	-45.5619
10 - 40	0	0	20037.1	-43.9789
11 - 40	1.97341e-167	3.27381e-167	20037.1	-27.7726
12 - 40	0	0	20037.1	-39.7888
13 - 40	5.26752e-34	6.70907e-34	20037.1	12.1187
14 - 40	1.6854e-110	2.54138e-110	20037.1	-22.4198
17 - 40	5.68949e-12	6.39511e-12	20037.1	6.7912
19 - 40	0	0	20037.1	-86.5609
2 - 40	0	0	20037.1	-61.0696
20 - 40	6.22856e-140	9.96802e-140	20037.1	25.321
21 - 40	7.48627e-13	8.48116e-13	20037.1	7.07849
22 - 40	3.82215e-101	5.65442e-101	20037.1	-21.4195
23 - 40	0	0	20037.1	-64.5862
26 - 40	7.2147e-251	1.39907e-250	20037.1	-34.2139
27 - 40	1.02924e-30	1.29938e-30	20037.1	11.4773
28 - 40	4.58986e-21	5.49634e-21	20037.1	-9.35366
29 - 40	0	0	20037.1	-64.2485
30 - 40	0	0	20037.1	-60.9978
31 - 40	0	0	20037.1	-71.1597
33 - 40	0	0	20037.1	-70.8853
37 - 40	0	0	20037.1	-69.1363
38 - 40	8.58873e-209	1.56011e-208	20037.1	-31.1196
39 - 40	0	0	20037.1	-44.3667
4 - 40	0	0	20037.1	-40.9645
1 - 41	2.66487e-38	3.42455e-38	20037.1	12.9093
10 - 41	3.9694e-67	5.44212e-67	20037.1	17.3235
11 - 41	0	0	20037.1	43.1554
12 - 41	6.01738e-95	8.7813e-95	20037.1	20.7315
13 - 41	0	0	20037.1	77.694
14 - 41	0	0	20037.1	43.5084
17 - 41	0	0	20037.1	78.5667
19 - 41	2.0844e-128	3.23948e-128	20037.1	-24.2244
2 - 41	0.03854	0.0395978	20037.1	-1.76796
20 - 41	0	0	20037.1	92.5878
21 - 41	0	0	20037.1	72.3273
22 - 41	0	0	20037.1	48.3869
23 - 41	1.53725e-22	1.86156e-22	20037.1	-9.70756
26 - 41	2.12408e-124	3.28927e-124	20037.1	23.8318
27 - 41	0	0	20037.1	78.9742
28 - 41	0	0	20037.1	62.9153
29 - 41	7.25594e-19	8.59335e-19	20037.1	-8.80052
30 - 41	4.61217e-14	5.30892e-14	20037.1	7.45592
31 - 41	8.36356e-40	1.07639e-39	20037.1	-13.175
33 - 41	6.78539e-36	8.68087e-36	20037.1	-12.4726
37 - 41	1.40479e-07	1.52911e-07	20037.1	-5.13725
38 - 41	1.90896e-164	3.14868e-164	20037.1	27.5163
39 - 41	6.35681e-89	9.15253e-89	20037.1	20.0411
4 - 41	5.30622e-119	8.11485e-119	20037.1	23.2931
40 - 41	0	0	20037.1	60.8746
1 - 42	6.18612e-220	1.14297e-219	20037.1	31.9656
10 - 42	1.12555e-286	2.30737e-286	20037.1	36.6597
11 - 42	0	0	20037.1	61.5161
12 - 42	0	0	20037.1	39.6007
13 - 42	0	0	20037.1	91.6445
14 - 42	0	0	20037.1	61.1699
17 - 42	0	0	20037.1	92.6266
19 - 42	0.146944	0.149373	20037.1	-1.04965
2 - 42	1.26742e-77	1.77439e-77	20037.1	18.6799
20 - 42	0	0	20037.1	104.856
21 - 42	0	0	20037.1	86.8498
22 - 42	0	0	20037.1	66.004
23 - 42	4.21519e-24	5.13335e-24	20037.1	10.0691
26 - 42	0	0	20037.1	41.9093
27 - 42	0	0	20037.1	92.8586
28 - 42	0	0	20037.1	78.9982
29 - 42	8.89103e-29	1.10784e-28	20037.1	11.0829
30 - 42	5.8695e-186	1.0067e-185	20037.1	29.3156
31 - 42	3.5723e-15	4.16205e-15	20037.1	7.78686
33 - 42	5.79605e-18	6.82681e-18	20037.1	8.5635
37 - 42	1.09928e-63	1.49287e-63	20037.1	16.8557
38 - 42	0	0	20037.1	45.4156
39 - 42	0	0	20037.1	39.7865
4 - 42	0	0	20037.1	42.6966
40 - 42	0	0	20037.1	76.1761
41 - 42	7.35753e-95	1.07188e-94	20037.1	20.7217
1 - 43	1.53775e-211	2.8051e-211	20037.1	31.3301
10 - 43	2.5989e-284	5.28996e-284	20037.1	36.5028
11 - 43	0	0	20037.1	64.6204
12 - 43	0	0	20037.1	39.6615
13 - 43	0	0	20037.1	97.3665
14 - 43	0	0	20037.1	63.6737
17 - 43	0	0	20037.1	99.7471
19 - 43	6.04548e-06	6.50645e-06	20037.1	-4.37685
2 - 43	7.90967e-65	1.07586e-64	20037.1	17.0124
20 - 43	0	0	20037.1	112.487
21 - 43	0	0	20037.1	91.9821
22 - 43	0	0	20037.1	69.4978
23 - 43	2.24781e-15	2.62244e-15	20037.1	7.84535
26 - 43	0	0	20037.1	42.0408
27 - 43	0	0	20037.1	99.109
28 - 43	0	0	20037.1	84.4435
29 - 43	2.63788e-19	3.13271e-19	20037.1	8.91373
30 - 43	1.65664e-178	2.80782e-178	20037.1	28.7044
31 - 43	5.36232e-08	5.85909e-08	20037.1	5.31561
33 - 43	4.25816e-10	4.73679e-10	20037.1	6.13745
37 - 43	5.3581e-51	7.07566e-51	20037.1	15.0099
38 - 43	0	0	20037.1	45.8598
39 - 43	0	0	20037.1	40.0517
4 - 43	0	0	20037.1	43.2293
40 - 43	0	0	20037.1	79.5185
41 - 43	5.65289e-82	7.99202e-82	20037.1	19.215
42 - 43	0.00174767	0.00183505	20037.1	-2.92073
1 - 44	1.98071e-119	3.0345e-119	20037.1	23.3363
10 - 44	2.89677e-169	4.82422e-169	20037.1	27.9288
11 - 44	0	0	20037.1	53.2572
12 - 44	4.21561e-208	7.6253e-208	20037.1	31.0664
13 - 44	0	0	20037.1	85.2306
14 - 44	0	0	20037.1	53.1837
17 - 44	0	0	20037.1	86.1645
19 - 44	1.69796e-30	2.13735e-30	20037.1	-11.4337
2 - 44	1.81935e-21	2.1878e-21	20037.1	9.45136
20 - 44	0	0	20037.1	99.148
21 - 44	0	0	20037.1	80.1938
22 - 44	0	0	20037.1	58.0528
23 - 44	0.136178	0.138593	20037.1	1.09768
26 - 44	1.13709e-243	2.18048e-243	20037.1	33.703
27 - 44	0	0	20037.1	86.4722
28 - 44	0	0	20037.1	71.6958
29 - 44	0.0192691	0.020037	20037.1	2.0692
30 - 44	7.72596e-85	1.10683e-84	20037.1	19.5596
31 - 44	0.0467329	0.0479584	20037.1	-1.67746
33 - 44	0.17637	0.178443	20037.1	-0.929306
37 - 44	1.30929e-12	1.47745e-12	20037.1	7.00043
38 - 44	2.91599e-296	6.02078e-296	20037.1	37.2901
39 - 44	5.79471e-206	1.04378e-205	20037.1	30.9014
4 - 44	3.07674e-247	5.95297e-247	20037.1	33.9571
40 - 44	0	0	20037.1	69.181
41 - 44	2.87588e-30	3.60427e-30	20037.1	11.3876
42 - 44	3.51455e-21	4.2204e-21	20037.1	-9.38195
43 - 44	1.03534e-12	1.16985e-12	20037.1	-7.03331
1 - 45	0	0	20037.1	-70.1076
10 - 45	0	0	20037.1	-69.8422
11 - 45	0	0	20037.1	-58.2549
12 - 45	0	0	20037.1	-65.2781
13 - 45	2.40471e-55	3.20504e-55	20037.1	-15.6662
14 - 45	0	0	20037.1	-50.4442
17 - 45	1.40169e-126	2.17452e-126	20037.1	-24.0461
19 - 45	0	0	20037.1	-112.984
2 - 45	0	0	20037.1	-86.0269
20 - 45	0.000572564	0.000605624	20037.1	-3.2526
21 - 45	1.95994e-93	2.85052e-93	20037.1	-20.5602
22 - 45	0	0	20037.1	-51.334
23 - 45	0	0	20037.1	-87.5132
26 - 45	0	0	20037.1	-58.5433
27 - 45	1.70494e-66	2.33378e-66	20037.1	-17.2384
28 - 45	0	0	20037.1	-40.4708
29 - 45	0	0	20037.1	-87.4347
30 - 45	0	0	20037.1	-90.3198
31 - 45	0	0	20037.1	-95.5226
33 - 45	0	0	20037.1	-95.4459
37 - 45	0	0	20037.1	-96.3203
38 - 45	0	0	20037.1	-55.7165
39 - 45	0	0	20037.1	-71.7024
4 - 45	0	0	20037.1	-68.2222
40 - 45	9.81563e-143	1.57673e-142	20037.1	-25.581
41 - 45	0	0	20037.1	-86.5664
42 - 45	0	0	20037.1	-99.3836
43 - 45	0	0	20037.1	-104.974
44 - 45	0	0	20037.1	-93.4522
1 - 46	2.15135e-20	2.56909e-20	20037.1	-9.18832
10 - 46	3.78356e-09	4.1872e-09	20037.1	-5.77989
11 - 46	1.96742e-63	2.66764e-63	20037.1	16.8208
12 - 46	0.0194941	0.0202466	20037.1	-2.06442
13 - 46	0	0	20037.1	53.5475
14 - 46	9.98248e-80	1.4067e-79	20037.1	18.9404
17 - 46	0	0	20037.1	52.3082
19 - 46	0	0	20037.1	-47.9826
2 - 46	8.84381e-129	1.37695e-128	20037.1	-24.2606
20 - 46	0	0	20037.1	68.0047
21 - 46	0	0	20037.1	48.2458
22 - 46	3.13183e-111	4.73071e-111	20037.1	22.4961
23 - 46	3.93289e-202	7.02535e-202	20037.1	-30.6035
26 - 46	0.0252028	0.0260813	20037.1	1.9566
27 - 46	0	0	20037.1	54.1787
28 - 46	1.56937e-281	3.1719e-281	20037.1	36.3175
29 - 46	2.88642e-193	5.05124e-193	20037.1	-29.9039
30 - 46	9.53012e-75	1.32346e-74	20037.1	-18.3179
31 - 46	1.0236e-265	2.02603e-265	20037.1	-35.2466
33 - 46	8.4802e-258	1.65191e-257	20037.1	-34.6993
37 - 46	8.87951e-187	1.52905e-186	20037.1	-29.3822
38 - 46	2.5519e-08	2.7954e-08	20037.1	5.44939
39 - 46	1.53297e-05	1.64574e-05	20037.1	-4.16931
4 - 46	0.200904	0.202788	20037.1	-0.838413
40 - 46	0	0	20037.1	38.233
41 - 46	1.02765e-116	1.56604e-116	20037.1	-23.0613
42 - 46	0	0	20037.1	-41.8894
43 - 46	0	0	20037.1	-42.1851
44 - 46	3.83999e-239	7.3309e-239	20037.1	-33.3779
45 - 46	0	0	20037.1	64.0824
1 - 5	3.54341e-227	6.66131e-227	20037.1	32.5047
10 - 5	6.41241e-308	1.34007e-307	20037.1	38.0441
11 - 5	0	0	20037.1	68.5512
12 - 5	0	0	20037.1	41.3123
13 - 5	0	0	20037.1	102.747
14 - 5	0	0	20037.1	67.0186
17 - 5	0	0	20037.1	106.382
19 - 5	1.13335e-06	1.22744e-06	20037.1	-4.72921
2 - 5	3.85219e-69	5.2983e-69	20037.1	17.5915
20 - 5	0	0	20037.1	119.198
21 - 5	0	0	20037.1	96.9686
22 - 5	0	0	20037.1	73.635
23 - 5	6.70624e-16	7.85588e-16	20037.1	7.99612
26 - 5	0	0	20037.1	43.6621
27 - 5	0	0	20037.1	104.931
28 - 5	0	0	20037.1	89.9826
29 - 5	4.47969e-20	5.34212e-20	20037.1	9.1088
30 - 5	1.5093e-196	2.67388e-196	20037.1	30.1646
31 - 5	3.59739e-08	3.93564e-08	20037.1	5.38791
33 - 5	2.14679e-10	2.39119e-10	20037.1	6.24555
37 - 5	7.75569e-55	1.03209e-54	20037.1	15.5908
38 - 5	0	0	20037.1	47.686
39 - 5	0	0	20037.1	41.9431
4 - 5	0	0	20037.1	45.2819
40 - 5	0	0	20037.1	83.1885
41 - 5	5.89449e-88	8.47272e-88	20037.1	19.9281
42 - 5	0.00077958	0.000822572	20037.1	-3.1638
43 - 5	0.441431	0.441944	20037.1	-0.147343
44 - 5	3.74733e-13	4.27344e-13	20037.1	7.17399
45 - 5	0	0	20037.1	110.044
46 - 5	0	0	20037.1	44.0016
1 - 50	6.24811e-26	7.64151e-26	20037.1	-10.4771
10 - 50	8.59404e-13	9.72334e-13	20037.1	-7.05929
11 - 50	2.81047e-58	3.77506e-58	20037.1	16.0941
12 - 50	0.000612511	0.000647082	20037.1	-3.23337
13 - 50	0	0	20037.1	54.017
14 - 50	1.49e-74	2.06584e-74	20037.1	18.2932
17 - 50	0	0	20037.1	52.9687
19 - 50	0	0	20037.1	-50.3358
2 - 50	2.10274e-146	3.39674e-146	20037.1	-25.9176
20 - 50	0	0	20037.1	69.0648
21 - 50	0	0	20037.1	48.5276
22 - 50	2.91312e-106	4.36969e-106	20037.1	21.9721
23 - 50	2.8043e-223	5.21491e-223	20037.1	-32.2156
26 - 50	0.175868	0.178144	20037.1	0.931246
27 - 50	0	0	20037.1	54.7417
28 - 50	6.24171e-282	1.2645e-281	20037.1	36.3442
29 - 50	4.13683e-214	7.6107e-214	20037.1	-31.5259
30 - 50	5.49778e-90	7.95561e-90	20037.1	-20.1646
31 - 50	3.61541e-293	7.42928e-293	20037.1	-37.0877
33 - 50	5.34305e-285	1.09013e-284	20037.1	-36.5485
37 - 50	6.40873e-212	1.17402e-211	20037.1	-31.3591
38 - 50	3.48493e-06	3.76006e-06	20037.1	4.49559
39 - 50	2.14988e-08	2.36404e-08	20037.1	-5.47984
4 - 50	0.0200748	0.0208246	20037.1	-2.05232
40 - 50	0	0	20037.1	38.1148
41 - 50	7.00553e-134	1.11082e-133	20037.1	-24.751
42 - 50	0	0	20037.1	-43.7429
43 - 50	0	0	20037.1	-44.2918
44 - 50	1.2966e-264	2.55462e-264	20037.1	-35.1709
45 - 50	0	0	20037.1	64.7053
46 - 50	0.128665	0.131101	20037.1	-1.13275
5 - 50	0	0	20037.1	-46.3113
1 - 52	0	0	20037.1	-47.5212
10 - 52	0	0	20037.1	-46.1403
11 - 52	3.4538e-184	5.90024e-184	20037.1	-29.1715
12 - 52	0	0	20037.1	-41.4765
13 - 52	1.06328e-57	1.42376e-57	20037.1	16.0107
14 - 52	9.00223e-114	1.3622e-113	20037.1	-22.7597
17 - 52	2.6034e-26	3.19762e-26	20037.1	10.56
19 - 52	0	0	20037.1	-92.7309
2 - 52	0	0	20037.1	-64.4263
20 - 52	9.77025e-211	1.77847e-210	20037.1	31.2687
21 - 52	4.01254e-25	4.90042e-25	20037.1	10.2989
22 - 52	3.31704e-105	4.95828e-105	20037.1	-21.8591
23 - 52	0	0	20037.1	-67.4864
26 - 52	7.15031e-265	1.41202e-264	20037.1	-35.1887
27 - 52	3.24904e-54	4.31701e-54	20037.1	15.4981
28 - 52	2.43866e-16	2.86451e-16	20037.1	-8.12014
29 - 52	0	0	20037.1	-67.2148
30 - 52	0	0	20037.1	-66.162
31 - 52	0	0	20037.1	-75.0769
33 - 52	0	0	20037.1	-74.8641
37 - 52	0	0	20037.1	-74.1362
38 - 52	9.87169e-219	1.82003e-218	20037.1	-31.8753
39 - 52	0	0	20037.1	-46.975
4 - 52	0	0	20037.1	-43.199
40 - 52	0.0162578	0.0169262	20037.1	2.13814
41 - 52	0	0	20037.1	-64.4887
42 - 52	0	0	20037.1	-79.9715
43 - 52	0	0	20037.1	-84.5878
44 - 52	0	0	20037.1	-72.9111
45 - 52	2.69654e-200	4.80688e-200	20037.1	30.4599
46 - 52	0	0	20037.1	-39.8581
5 - 52	0	0	20037.1	-89.3088
50 - 52	0	0	20037.1	-39.8954
1 - 53	2.20018e-203	3.93837e-203	20037.1	30.7012
10 - 53	2.136e-271	4.26704e-271	20037.1	35.6346
11 - 53	0	0	20037.1	62.2187
12 - 53	0	0	20037.1	38.7117
13 - 53	0	0	20037.1	93.9214
14 - 53	0	0	20037.1	61.6066
17 - 53	0	0	20037.1	95.5816
19 - 53	4.46242e-05	4.77285e-05	20037.1	-3.91877
2 - 53	2.48793e-63	3.3681e-63	20037.1	16.8067
20 - 53	0	0	20037.1	108.185
21 - 53	0	0	20037.1	88.7968
22 - 53	0	0	20037.1	66.9446
23 - 53	1.17336e-15	1.37265e-15	20037.1	7.92673
26 - 53	0	0	20037.1	41.095
27 - 53	0	0	20037.1	95.401
28 - 53	0	0	20037.1	81.0016
29 - 53	1.65531e-19	1.97126e-19	20037.1	8.9654
30 - 53	2.26399e-169	3.7777e-169	20037.1	27.9379
31 - 53	2.36331e-08	2.59542e-08	20037.1	5.46304
33 - 53	1.94596e-10	2.1703e-10	20037.1	6.26091
37 - 53	8.57894e-50	1.13116e-49	20037.1	14.8231
38 - 53	0	0	20037.1	44.7741
39 - 53	0	0	20037.1	38.9629
4 - 53	0	0	20037.1	42.0286
40 - 53	0	0	20037.1	77.1723
41 - 53	1.40143e-79	1.97162e-79	20037.1	18.9223
42 - 53	0.00529918	0.00553041	20037.1	-2.55587
43 - 53	0.378538	0.379419	20037.1	0.309327
44 - 53	5.09789e-13	5.80593e-13	20037.1	7.13166
45 - 53	0	0	20037.1	101.667
46 - 53	0	0	20037.1	41.1254
5 - 53	0.321213	0.322713	20037.1	0.464315
50 - 53	0	0	20037.1	43.1032
52 - 53	0	0	20037.1	81.6013
1 - 54	0	0	20037.1	-61.3894
10 - 54	0	0	20037.1	-60.616
11 - 54	0	0	20037.1	-47.4032
12 - 54	0	0	20037.1	-56.2527
13 - 54	3.74935e-11	4.19245e-11	20037.1	-6.51325
14 - 54	0	0	20037.1	-40.657
17 - 54	7.96997e-43	1.03501e-42	20037.1	-13.6938
19 - 54	0	0	20037.1	-103.013
2 - 54	0	0	20037.1	-76.9684
20 - 54	1.39122e-09	1.5436e-09	20037.1	5.94618
21 - 54	3.23093e-30	4.04336e-30	20037.1	-11.3774
22 - 54	0	0	20037.1	-40.819
23 - 54	0	0	20037.1	-79.2484
26 - 54	0	0	20037.1	-50.0383
27 - 54	5.01995e-15	5.84078e-15	20037.1	-7.74363
28 - 54	1.00158e-190	1.74214e-190	20037.1	-29.7007
29 - 54	0	0	20037.1	-79.0679
30 - 54	0	0	20037.1	-79.4235
31 - 54	0	0	20037.1	-86.6015
33 - 54	0	0	20037.1	-86.4452
37 - 54	0	0	20037.1	-86.2308
38 - 54	0	0	20037.1	-47.1437
39 - 54	0	0	20037.1	-61.8751
4 - 54	0	0	20037.1	-58.473
40 - 54	5.54678e-65	7.55662e-65	20037.1	-17.0334
41 - 54	0	0	20037.1	-77.2065
42 - 54	0	0	20037.1	-90.8934
43 - 54	0	0	20037.1	-95.5012
44 - 54	0	0	20037.1	-84.5899
45 - 54	1.41218e-16	1.66104e-16	20037.1	8.18636
46 - 54	0	0	20037.1	-54.9334
5 - 54	0	0	20037.1	-99.9233
50 - 54	0	0	20037.1	-55.2628
52 - 54	2.97478e-96	4.36335e-96	20037.1	-20.8783
53 - 54	0	0	20037.1	-92.6282
1 - 60	1.10436e-118	1.68591e-118	20037.1	23.261
10 - 60	1.00574e-177	1.70126e-177	20037.1	28.6394
11 - 60	0	0	20037.1	59.8285
12 - 60	1.80803e-222	3.35498e-222	20037.1	32.1552
13 - 60	0	0	20037.1	96.4158
14 - 60	0	0	20037.1	58.5691
17 - 60	0	0	20037.1	100.356
19 - 60	1.08082e-58	1.45405e-58	20037.1	-16.1538
2 - 60	1.24529e-14	1.44501e-14	20037.1	7.62704
20 - 60	0	0	20037.1	113.963
21 - 60	0	0	20037.1	90.2913
22 - 60	0	0	20037.1	65.3193
23 - 60	0.0596084	0.061026	20037.1	-1.55812
26 - 60	5.21248e-261	1.02231e-260	20037.1	34.9222
27 - 60	0	0	20037.1	98.7381
28 - 60	0	0	20037.1	82.7152
29 - 60	0.305457	0.307242	20037.1	-0.508775
30 - 60	2.91798e-83	4.15957e-83	20037.1	19.3706
31 - 60	7.4237e-07	8.07046e-07	20037.1	-4.81448
33 - 60	3.14335e-05	3.37039e-05	20037.1	-4.00249
37 - 60	9.9127e-07	1.07492e-06	20037.1	4.75636
38 - 60	0	0	20037.1	39.0367
39 - 60	1.17411e-224	2.19763e-224	20037.1	32.318
4 - 60	1.79822e-274	3.60901e-274	20037.1	35.843
40 - 60	0	0	20037.1	75.937
41 - 60	6.09711e-23	7.40425e-23	20037.1	9.80177
42 - 60	6.6213e-40	8.54714e-40	20037.1	-13.1928
43 - 60	2.44173e-28	3.03367e-28	20037.1	-10.9917
44 - 60	0.00170623	0.00179373	20037.1	-2.9282
45 - 60	0	0	20037.1	104.158
46 - 60	3.4435e-260	6.73829e-260	20037.1	34.8654
5 - 60	2.43134e-30	3.05158e-30	20037.1	-11.4023
50 - 60	3.29438e-293	6.78579e-293	20037.1	37.0904
52 - 60	0	0	20037.1	82.1313
53 - 60	4.74881e-28	5.88306e-28	20037.1	-10.9312
54 - 60	0	0	20037.1	93.531
1 - 61	0.248449	0.250193	20037.1	-0.679388
10 - 61	0.0046405	0.00484887	20037.1	2.60174
11 - 61	8.63014e-108	1.29905e-107	20037.1	22.1345
12 - 61	5.58058e-09	6.16801e-09	20037.1	5.71406
13 - 61	0	0	20037.1	52.5387
14 - 61	2.85969e-124	4.42046e-124	20037.1	23.819
17 - 61	0	0	20037.1	50.7192
19 - 61	5.61798e-242	1.07491e-241	20037.1	-33.5817
2 - 61	1.20044e-42	1.55659e-42	20037.1	-13.6638
20 - 61	0	0	20037.1	64.0856
21 - 61	0	0	20037.1	48.1994
22 - 61	7.67349e-156	1.24894e-155	20037.1	26.7651
23 - 61	2.91682e-89	4.20667e-89	20037.1	-20.0805
26 - 61	1.69494e-19	2.01567e-19	20037.1	8.96278
27 - 61	0	0	20037.1	52.8016
28 - 61	2.80975e-305	5.82938e-305	20037.1	37.8744
29 - 61	4.67582e-83	6.65435e-83	20037.1	-19.3459
30 - 61	6.56981e-13	7.45271e-13	20037.1	-7.0966
31 - 61	2.88088e-121	4.44524e-121	20037.1	-23.5206
33 - 61	1.30272e-115	1.98169e-115	20037.1	-22.9487
37 - 61	2.69868e-66	3.6882e-66	20037.1	-17.2115
38 - 61	1.38197e-33	1.74982e-33	20037.1	12.0389
39 - 61	8.40223e-06	9.03161e-06	20037.1	4.30447
4 - 61	5.94543e-13	6.75332e-13	20037.1	7.11043
40 - 61	0	0	20037.1	40.1668
41 - 61	3.2018e-35	4.09014e-35	20037.1	-12.3475
42 - 61	6.23715e-194	1.0982e-193	20037.1	-29.957
43 - 61	9.41798e-183	1.60255e-182	20037.1	-29.0541
44 - 61	8.45648e-106	1.26627e-105	20037.1	-21.9227
45 - 61	0	0	20037.1	61.9861
46 - 61	2.08843e-14	2.4201e-14	20037.1	7.55991
5 - 61	2.05923e-193	3.61835e-193	20037.1	-29.9156
50 - 61	2.4288e-18	2.86465e-18	20037.1	8.66348
52 - 61	0	0	20037.1	41.1481
53 - 61	1.91953e-177	3.24062e-177	20037.1	-28.6161
54 - 61	0	0	20037.1	54.3871
60 - 61	1.79515e-101	2.66029e-101	20037.1	-21.4553
1 - 65	0	0	20037.1	-76.6576
10 - 65	0	0	20037.1	-77.0684
11 - 65	0	0	20037.1	-67.18
12 - 65	0	0	20037.1	-71.9994
13 - 65	1.07714e-82	1.52536e-82	20037.1	-19.3022
14 - 65	0	0	20037.1	-57.3023
17 - 65	2.07743e-187	3.5845e-187	20037.1	-29.4333
19 - 65	0	0	20037.1	-123.407
2 - 65	0	0	20037.1	-93.7731
20 - 65	3.73215e-09	4.13562e-09	20037.1	-5.78219
21 - 65	1.73166e-132	2.73571e-132	20037.1	-24.618
22 - 65	0	0	20037.1	-59.2439
23 - 65	0	0	20037.1	-94.1775
26 - 65	0	0	20037.1	-64.2793
27 - 65	1.29953e-99	1.91591e-99	20037.1	-21.2515
28 - 65	0	0	20037.1	-47.8613
29 - 65	0	0	20037.1	-94.2378
30 - 65	0	0	20037.1	-101.356
31 - 65	0	0	20037.1	-103.458
33 - 65	0	0	20037.1	-103.502
37 - 65	0	0	20037.1	-106.211
38 - 65	0	0	20037.1	-61.3923
39 - 65	0	0	20037.1	-79.9014
4 - 65	0	0	20037.1	-76.1107
40 - 65	2.47258e-188	4.27488e-188	20037.1	-29.5081
41 - 65	0	0	20037.1	-94.7963
42 - 65	0	0	20037.1	-106.813
43 - 65	0	0	20037.1	-114.186
44 - 65	0	0	20037.1	-101.215
45 - 65	0.0288094	0.029671	20037.1	-1.89868
46 - 65	0	0	20037.1	-70.906
5 - 65	0	0	20037.1	-120.615
50 - 65	0	0	20037.1	-71.9609
52 - 65	1.326e-271	2.65509e-271	20037.1	-35.6487
53 - 65	0	0	20037.1	-110.033
54 - 65	5.92112e-27	7.31432e-27	20037.1	-10.6987
60 - 65	0	0	20037.1	-115.403
61 - 65	0	0	20037.1	-66.8473
1 - 66	4.64647e-92	6.73503e-92	20037.1	20.4033
10 - 66	3.30145e-130	5.16827e-130	20037.1	24.3988
11 - 66	0	0	20037.1	46.108
12 - 66	5.06925e-162	8.32944e-162	20037.1	27.3066
13 - 66	0	0	20037.1	75.2264
14 - 66	0	0	20037.1	46.6712
17 - 66	0	0	20037.1	74.7793
19 - 66	1.74074e-30	2.188e-30	20037.1	-11.4315
2 - 66	9.21961e-15	1.07127e-14	20037.1	7.66581
20 - 66	0	0	20037.1	87.1254
21 - 66	0	0	20037.1	70.8238
22 - 66	0	0	20037.1	50.4807
23 - 66	0.466752	0.466752	20037.1	0.0834375
26 - 66	2.32066e-193	4.06943e-193	20037.1	29.9115
27 - 66	0	0	20037.1	75.9262
28 - 66	0	0	20037.1	62.0801
29 - 66	0.16538	0.167915	20037.1	0.972603
30 - 66	1.31251e-60	1.77405e-60	20037.1	16.4266
31 - 66	0.00601629	0.00627121	20037.1	-2.51138
33 - 66	0.0337708	0.0347392	20037.1	-1.82813
37 - 66	5.78577e-08	6.31375e-08	20037.1	5.30174
38 - 66	9.04936e-236	1.71998e-235	20037.1	33.1339
39 - 66	7.31423e-157	1.19498e-156	20037.1	26.8553
4 - 66	1.08707e-189	1.88702e-189	20037.1	29.6174
40 - 66	0	0	20037.1	61.7603
41 - 66	3.55831e-21	4.26699e-21	20037.1	9.38064
42 - 66	3.8265e-22	4.60785e-22	20037.1	-9.61378
43 - 66	5.6652e-14	6.50365e-14	20037.1	-7.4287
44 - 66	0.166597	0.168952	20037.1	-0.967719
45 - 66	0	0	20037.1	83.5515
46 - 66	2.77489e-186	4.76883e-186	20037.1	29.3421
5 - 66	2.30436e-14	2.66316e-14	20037.1	-7.54707
50 - 66	4.78661e-205	8.6039e-205	20037.1	30.8303
52 - 66	0	0	20037.1	64.1101
53 - 66	2.72988e-14	3.15071e-14	20037.1	-7.52491
54 - 66	0	0	20037.1	75.7696
60 - 66	0.0572139	0.0586443	20037.1	1.57866
61 - 66	4.99529e-84	7.13258e-84	20037.1	19.4626
65 - 66	0	0	20037.1	89.4285
1 - 67	7.22555e-12	8.11109e-12	20037.1	6.75657
10 - 67	5.0208e-23	6.1058e-23	20037.1	9.82144
11 - 67	2.21603e-157	3.62739e-157	20037.1	26.901
12 - 67	5.21083e-36	6.67637e-36	20037.1	12.4937
13 - 67	0	0	20037.1	52.8335
14 - 67	8.24026e-174	1.38301e-173	20037.1	28.3127
17 - 67	0	0	20037.1	50.8912
19 - 67	6.98062e-104	1.03985e-103	20037.1	-21.7168
2 - 67	2.14002e-06	2.31477e-06	20037.1	-4.59835
20 - 67	0	0	20037.1	62.464
21 - 67	0	0	20037.1	49.1607
22 - 67	6.96526e-205	1.24939e-204	20037.1	30.8177
23 - 67	2.00815e-27	2.48422e-27	20037.1	-10.7989
26 - 67	2.52769e-52	3.35338e-52	20037.1	15.213
27 - 67	0	0	20037.1	52.9235
28 - 67	0	0	20037.1	40.1257
29 - 67	4.10452e-24	5.00565e-24	20037.1	-10.0717
30 - 67	0.0277764	0.0286757	20037.1	1.91462
31 - 67	2.06161e-41	2.66924e-41	20037.1	-13.4536
33 - 67	3.31537e-38	4.25415e-38	20037.1	-12.8924
37 - 67	2.77542e-13	3.17348e-13	20037.1	-7.21504
38 - 67	8.14027e-72	1.125e-71	20037.1	17.9416
39 - 67	1.04233e-30	1.31397e-30	20037.1	11.4762
4 - 67	5.05496e-44	6.58445e-44	20037.1	13.8943
40 - 67	0	0	20037.1	42.4649
41 - 67	0.000513247	0.000543549	20037.1	-3.28356
42 - 67	1.3499e-84	1.93067e-84	20037.1	-19.5306
43 - 67	1.78922e-72	2.47672e-72	20037.1	-18.0267
44 - 67	1.02498e-33	1.30163e-33	20037.1	-12.0637
45 - 67	0	0	20037.1	61.2886
46 - 67	1.53704e-45	2.01429e-45	20037.1	14.1442
5 - 67	3.11876e-75	4.33806e-75	20037.1	-18.3794
50 - 67	4.39626e-52	5.82335e-52	20037.1	15.1764
52 - 67	0	0	20037.1	43.091
53 - 67	1.03288e-71	1.42518e-71	20037.1	-17.9282
54 - 67	0	0	20037.1	54.8042
60 - 67	7.99281e-27	9.85932e-27	20037.1	-10.6707
61 - 67	2.69168e-12	3.02946e-12	20037.1	6.89855
65 - 67	0	0	20037.1	65.0012
66 - 67	2.29639e-26	2.82456e-26	20037.1	-10.5718
1 - 9	7.57125e-45	9.89203e-45	20037.1	-14.0307
10 - 9	1.30165e-28	1.61954e-28	20037.1	-11.0486
11 - 9	1.66975e-18	1.97209e-18	20037.1	8.70621
12 - 9	2.19802e-14	2.54368e-14	20037.1	-7.55324
13 - 9	0	0	20037.1	42.6715
14 - 9	2.07984e-29	2.59904e-29	20037.1	11.2129
17 - 9	0	0	20037.1	40.2687
19 - 9	0	0	20037.1	-50.1988
2 - 9	1.96783e-171	3.29631e-171	20037.1	-28.1125
20 - 9	0	0	20037.1	55.2965
21 - 9	2.8144e-306	5.85313e-306	20037.1	37.9387
22 - 9	2.42033e-44	3.15744e-44	20037.1	13.9474
23 - 9	6.076e-247	1.17297e-246	20037.1	-33.9361
26 - 9	0.000147896	0.000157208	20037.1	-3.61949
27 - 9	0	0	20037.1	42.8366
28 - 9	6.77055e-147	1.09576e-146	20037.1	25.9624
29 - 9	6.08221e-238	1.15858e-237	20037.1	-33.2913
30 - 9	2.09293e-115	3.17815e-115	20037.1	-22.9276
31 - 9	0	0	20037.1	-38.3453
33 - 9	1.03849e-304	2.14937e-304	20037.1	-37.8379
37 - 9	1.64217e-233	3.11433e-233	20037.1	-32.9696
38 - 9	0.336106	0.337281	20037.1	-0.423119
39 - 9	7.96625e-23	9.66048e-23	20037.1	-9.77462
4 - 9	1.02308e-11	1.14697e-11	20037.1	-6.70588
40 - 9	2.27218e-189	3.93631e-189	20037.1	29.5917
41 - 9	5.02313e-159	8.23794e-159	20037.1	-27.0454
42 - 9	0	0	20037.1	-44.5659
43 - 9	0	0	20037.1	-44.8304
44 - 9	1.10297e-285	2.25572e-285	20037.1	-36.594
45 - 9	0	0	20037.1	53.2652
46 - 9	5.9544e-09	6.57274e-09	20037.1	-5.70301
5 - 9	0	0	20037.1	-46.4898
50 - 9	8.62781e-07	9.36765e-07	20037.1	-4.78435
52 - 9	1.23393e-195	2.18155e-195	20037.1	30.0924
53 - 9	0	0	20037.1	-43.8483
54 - 9	0	0	20037.1	45.0639
60 - 9	7.76087e-308	1.61794e-307	20037.1	-38.0388
61 - 9	5.68995e-34	7.2364e-34	20037.1	-12.1123
65 - 9	0	0	20037.1	58.4043
66 - 9	1.39353e-229	2.62545e-229	20037.1	-32.6819
67 - 9	1.14686e-71	1.57991e-71	20037.1	-17.9223

## Sheet: VUL_NH_CI
comparisons	P	P.adjusted	chi2	T
Ebf1_NH1 - Pdia5_NH1	0	0	18119.1	-38.1183
Ebf1_NH1 - Pdia5_NH2	0	0	18119.1	-68.4208
Pdia5_NH1 - Pdia5_NH2	0	0	18119.1	-40.7892
Ebf1_NH1 - Otx2_NH1	4.60952e-292	8.1064e-292	18119.1	-37.0147
Pdia5_NH1 - Otx2_NH1	4.99713e-10	5.38423e-10	18119.1	6.11193
Pdia5_NH2 - Otx2_NH1	0	0	18119.1	55.005
Ebf1_NH1 - Otx2_NH2	8.68947e-21	1.00719e-20	18119.1	-9.28569
Pdia5_NH1 - Otx2_NH2	0	0	18119.1	43.245
Pdia5_NH2 - Otx2_NH2	0	0	18119.1	90.6253
Otx2_NH1 - Otx2_NH2	0	0	18119.1	45.3009
Ebf1_NH1 - Fbn2_NH1	0	0	18119.1	-38.9447
Pdia5_NH1 - Fbn2_NH1	2.27987e-14	2.54613e-14	18119.1	-7.54846
Pdia5_NH2 - Fbn2_NH1	4.64315e-120	6.28674e-120	18119.1	23.3995
Otx2_NH1 - Fbn2_NH1	3.94771e-37	4.91056e-37	18119.1	-12.6986
Otx2_NH2 - Fbn2_NH1	0	0	18119.1	-40.4839
Ebf1_NH1 - Fbn2_NH2	4.4429e-25	5.31065e-25	18119.1	-10.289
Pdia5_NH1 - Fbn2_NH2	8.26084e-212	1.303e-211	18119.1	31.3504
Pdia5_NH2 - Fbn2_NH2	0	0	18119.1	66.9997
Otx2_NH1 - Fbn2_NH2	1.52536e-193	2.28804e-193	18119.1	29.9258
Otx2_NH2 - Fbn2_NH2	0.00175642	0.00182811	18119.1	-2.91917
Fbn2_NH1 - Fbn2_NH2	3.94256e-229	6.48614e-229	18119.1	32.6484
Ebf1_NH1 - mL_NH1	6.87002e-299	1.2366e-298	18119.1	-37.4607
Pdia5_NH1 - mL_NH1	1.65211e-13	1.83168e-13	18119.1	-7.28545
Pdia5_NH2 - mL_NH1	3.27367e-103	4.31786e-103	18119.1	21.6442
Otx2_NH1 - mL_NH1	2.35536e-33	2.90621e-33	18119.1	-11.9946
Otx2_NH2 - mL_NH1	3.09546e-306	5.63816e-306	18119.1	-37.9355
Fbn2_NH1 - mL_NH1	0.428591	0.431411	18119.1	-0.179963
Fbn2_NH2 - mL_NH1	5.08415e-209	7.85733e-209	18119.1	-31.1368
Ebf1_NH1 - mL_NH2	0	0	18119.1	-39.2708
Pdia5_NH1 - mL_NH2	4.40093e-27	5.34398e-27	18119.1	-10.7263
Pdia5_NH2 - mL_NH2	3.774e-61	4.93523e-61	18119.1	16.5028
Otx2_NH1 - mL_NH2	2.98301e-53	3.8353e-53	18119.1	-15.3535
Otx2_NH2 - mL_NH2	0	0	18119.1	-39.7087
Fbn2_NH1 - mL_NH2	0.000213843	0.000225641	18119.1	-3.52287
Fbn2_NH2 - mL_NH2	2.00387e-237	3.36915e-237	18119.1	-33.2534
mL_NH1 - mL_NH2	0.00064271	0.000673525	18119.1	-3.21959
Ebf1_NH1 - Sox6_NH1	0	0	18119.1	-106.77
Pdia5_NH1 - Sox6_NH1	0	0	18119.1	-93.4973
Pdia5_NH2 - Sox6_NH1	0	0	18119.1	-57.0854
Otx2_NH1 - Sox6_NH1	0	0	18119.1	-115.539
Otx2_NH2 - Sox6_NH1	0	0	18119.1	-145.526
Fbn2_NH1 - Sox6_NH1	0	0	18119.1	-65.0471
Fbn2_NH2 - Sox6_NH1	0	0	18119.1	-111.557
mL_NH1 - Sox6_NH1	0	0	18119.1	-60.7356
mL_NH2 - Sox6_NH1	0	0	18119.1	-53.5925
Ebf1_NH1 - Sox6_NH2	0	0	18119.1	-103.191
Pdia5_NH1 - Sox6_NH2	0	0	18119.1	-90.3982
Pdia5_NH2 - Sox6_NH2	0	0	18119.1	-49.5817
Otx2_NH1 - Sox6_NH2	0	0	18119.1	-118.279
Otx2_NH2 - Sox6_NH2	0	0	18119.1	-150.955
Fbn2_NH1 - Sox6_NH2	0	0	18119.1	-58.8601
Fbn2_NH2 - Sox6_NH2	0	0	18119.1	-109.04
mL_NH1 - Sox6_NH2	0	0	18119.1	-54.466
mL_NH2 - Sox6_NH2	0	0	18119.1	-47.1429
Sox6_NH1 - Sox6_NH2	4.83821e-47	6.11774e-47	18119.1	14.3875
Ebf1_NH1 - Sox6_NH3	0	0	18119.1	-91.5005
Pdia5_NH1 - Sox6_NH3	0	0	18119.1	-74.3434
Pdia5_NH2 - Sox6_NH3	3.87146e-187	5.69551e-187	18119.1	-29.4112
Otx2_NH1 - Sox6_NH3	0	0	18119.1	-103.083
Otx2_NH2 - Sox6_NH3	0	0	18119.1	-139.233
Fbn2_NH1 - Sox6_NH3	0	0	18119.1	-44.8934
Fbn2_NH2 - Sox6_NH3	0	0	18119.1	-95.9802
mL_NH1 - Sox6_NH3	0	0	18119.1	-41.2646
mL_NH2 - Sox6_NH3	1.45021e-254	2.49306e-254	18119.1	-34.4732
Sox6_NH1 - Sox6_NH3	0	0	18119.1	38.3061
Sox6_NH2 - Sox6_NH3	1.51752e-161	2.1301e-161	18119.1	27.2651
Ebf1_NH1 - Sox6_NH4	0	0	18119.1	-101.376
Pdia5_NH1 - Sox6_NH4	0	0	18119.1	-86.4593
Pdia5_NH2 - Sox6_NH4	0	0	18119.1	-48.7394
Otx2_NH1 - Sox6_NH4	0	0	18119.1	-108.544
Otx2_NH2 - Sox6_NH4	0	0	18119.1	-139.711
Fbn2_NH1 - Sox6_NH4	0	0	18119.1	-58.7595
Fbn2_NH2 - Sox6_NH4	0	0	18119.1	-105.613
mL_NH1 - Sox6_NH4	0	0	18119.1	-54.7357
mL_NH2 - Sox6_NH4	0	0	18119.1	-47.7956
Sox6_NH1 - Sox6_NH4	4.81253e-22	5.66398e-22	18119.1	9.59006
Sox6_NH2 - Sox6_NH4	2.60168e-05	2.78362e-05	18119.1	-4.04703
Sox6_NH3 - Sox6_NH4	1.15222e-171	1.64756e-171	18119.1	-28.1319
Ebf1_NH1 - Pcsk6_NH1	0	0	18119.1	-61.3528
Pdia5_NH1 - Pcsk6_NH1	4.48891e-209	7.0082e-209	18119.1	-31.1409
Pdia5_NH2 - Pcsk6_NH1	6.56232e-22	7.66439e-22	18119.1	9.55788
Otx2_NH1 - Pcsk6_NH1	0	0	18119.1	-43.1985
Otx2_NH2 - Pcsk6_NH1	0	0	18119.1	-79.1522
Fbn2_NH1 - Pcsk6_NH1	3.07771e-59	3.99059e-59	18119.1	-16.2319
Fbn2_NH2 - Pcsk6_NH1	0	0	18119.1	-58.6083
mL_NH1 - Pcsk6_NH1	1.02532e-50	1.30729e-50	18119.1	-14.9663
mL_NH2 - Pcsk6_NH1	7.50076e-25	8.89625e-25	18119.1	-10.2382
Sox6_NH1 - Pcsk6_NH1	0	0	18119.1	65.4128
Sox6_NH2 - Pcsk6_NH1	0	0	18119.1	59.0034
Sox6_NH3 - Pcsk6_NH1	0	0	18119.1	39.9376
Sox6_NH4 - Pcsk6_NH1	0	0	18119.1	57.4062
Ebf1_NH1 - Pcsk6_NH2	0	0	18119.1	-57.2531
Pdia5_NH1 - Pcsk6_NH2	8.01814e-124	1.09534e-123	18119.1	-23.7746
Pdia5_NH2 - Pcsk6_NH2	6.62983e-111	8.82055e-111	18119.1	22.462
Otx2_NH1 - Pcsk6_NH2	1.72724e-292	3.07288e-292	18119.1	-37.0427
Otx2_NH2 - Pcsk6_NH2	0	0	18119.1	-78.1333
Fbn2_NH1 - Pcsk6_NH2	1.29072e-20	1.48482e-20	18119.1	-9.24331
Fbn2_NH2 - Pcsk6_NH2	0	0	18119.1	-54.2305
mL_NH1 - Pcsk6_NH2	3.59533e-17	4.07471e-17	18119.1	-8.34996
mL_NH2 - Pcsk6_NH2	8.67147e-05	9.21344e-05	18119.1	-3.75546
Sox6_NH1 - Pcsk6_NH2	0	0	18119.1	84.0861
Sox6_NH2 - Pcsk6_NH2	0	0	18119.1	81.1719
Sox6_NH3 - Pcsk6_NH2	0	0	18119.1	61.9072
Sox6_NH4 - Pcsk6_NH2	0	0	18119.1	76.0016
Pcsk6_NH1 - Pcsk6_NH2	1.54854e-30	1.89542e-30	18119.1	11.4417
Ebf1_NH1 - Gad2_NH1	1.31939e-18	1.50646e-18	18119.1	-8.73295
Pdia5_NH1 - Gad2_NH1	1.33507e-135	1.84023e-135	18119.1	24.9141
Pdia5_NH2 - Gad2_NH1	0	0	18119.1	52.4403
Otx2_NH1 - Gad2_NH1	4.48719e-114	6.02229e-114	18119.1	22.7908
Otx2_NH2 - Gad2_NH1	0.0149777	0.0152773	18119.1	-2.17081
Fbn2_NH1 - Gad2_NH1	6.88931e-166	9.75986e-166	18119.1	27.6402
Fbn2_NH2 - Gad2_NH1	0.468807	0.468807	18119.1	0.0782694
mL_NH1 - Gad2_NH1	1.044e-155	1.45211e-155	18119.1	26.7531
mL_NH2 - Gad2_NH1	5.47673e-181	7.98038e-181	18119.1	28.909
Sox6_NH1 - Gad2_NH1	0	0	18119.1	88.2395
Sox6_NH2 - Gad2_NH1	0	0	18119.1	83.5816
Sox6_NH3 - Gad2_NH1	0	0	18119.1	72.1376
Sox6_NH4 - Gad2_NH1	0	0	18119.1	82.9448
Pcsk6_NH1 - Gad2_NH1	0	0	18119.1	46.0649
Pcsk6_NH2 - Gad2_NH1	0	0	18119.1	41.3575
Ebf1_NH1 - Gad2_NH2	1.09591e-39	1.37438e-39	18119.1	-13.1544
Pdia5_NH1 - Gad2_NH2	1.67649e-195	2.56503e-195	18119.1	30.0815
Pdia5_NH2 - Gad2_NH2	0	0	18119.1	68.182
Otx2_NH1 - Gad2_NH2	7.51278e-178	1.08439e-177	18119.1	28.6497
Otx2_NH2 - Gad2_NH2	2.07726e-11	2.25405e-11	18119.1	-6.6015
Fbn2_NH1 - Gad2_NH2	2.95819e-212	4.71462e-212	18119.1	31.3844
Fbn2_NH2 - Gad2_NH2	0.00222765	0.00230291	18119.1	-2.84425
mL_NH1 - Gad2_NH2	3.31146e-192	4.91896e-192	18119.1	29.819
mL_NH2 - Gad2_NH2	1.17853e-220	1.91825e-220	18119.1	32.0193
Sox6_NH1 - Gad2_NH2	0	0	18119.1	115.406
Sox6_NH2 - Gad2_NH2	0	0	18119.1	113.76
Sox6_NH3 - Gad2_NH2	0	0	18119.1	100.316
Sox6_NH4 - Gad2_NH2	0	0	18119.1	109.299
Pcsk6_NH1 - Gad2_NH2	0	0	18119.1	59.1699
Pcsk6_NH2 - Gad2_NH2	0	0	18119.1	54.8582
Gad2_NH1 - Gad2_NH2	0.00842514	0.00865132	18119.1	-2.39012
Ebf1_NH1 - Ebf1_NH2	0.192658	0.19521	18119.1	-0.868159
Pdia5_NH1 - Ebf1_NH2	7.40782e-217	1.19305e-216	18119.1	31.7337
Pdia5_NH2 - Ebf1_NH2	0	0	18119.1	57.3372
Otx2_NH1 - Ebf1_NH2	3.71991e-195	5.63512e-195	18119.1	30.0541
Otx2_NH2 - Ebf1_NH2	3.93959e-12	4.30541e-12	18119.1	6.84411
Fbn2_NH1 - Ebf1_NH2	2.48903e-244	4.23135e-244	18119.1	33.7497
Fbn2_NH2 - Ebf1_NH2	3.06843e-16	3.45198e-16	18119.1	8.09213
mL_NH1 - Ebf1_NH2	1.46516e-230	2.43663e-230	18119.1	32.7534
mL_NH2 - Ebf1_NH2	2.79098e-257	4.8525e-257	18119.1	34.6629
Sox6_NH1 - Ebf1_NH2	0	0	18119.1	90.5856
Sox6_NH2 - Ebf1_NH2	0	0	18119.1	86.0884
Sox6_NH3 - Ebf1_NH2	0	0	18119.1	75.464
Sox6_NH4 - Ebf1_NH2	0	0	18119.1	85.6288
Pcsk6_NH1 - Ebf1_NH2	0	0	18119.1	51.4192
Pcsk6_NH2 - Ebf1_NH2	0	0	18119.1	47.1443
Gad2_NH1 - Ebf1_NH2	7.2568e-13	7.9877e-13	18119.1	7.08281
Gad2_NH2 - Ebf1_NH2	5.9797e-26	7.20389e-26	18119.1	10.4812

## Sheet: VUL_territory_CI
comparisons	P	P.adjusted	chi2	T
Ebf1 - Pdia5	0	0	16403.6	-63.1282
Ebf1 - Otx2	3.56798e-182	5.25808e-182	16403.6	-29.0064
Pdia5 - Otx2	0	0	16403.6	59.4574
Ebf1 - Fbn2	3.4912e-155	4.88768e-155	16403.6	-26.7066
Pdia5 - Fbn2	0	0	16403.6	39.8241
Otx2 - Fbn2	0.00279208	0.00279208	16403.6	-2.7715
Ebf1 - mostlyLesion	0	0	16403.6	-45.2884
Pdia5 - mostlyLesion	7.05675e-16	7.59958e-16	16403.6	7.98981
Otx2 - mostlyLesion	6.87704e-194	1.06976e-193	16403.6	-29.9532
Fbn2 - mostlyLesion	2.54109e-119	3.38813e-119	16403.6	-23.3252
Ebf1 - Sox6	0	0	16403.6	-118.665
Pdia5 - Sox6	0	0	16403.6	-86.5098
Otx2 - Sox6	0	0	16403.6	-179.525
Fbn2 - Sox6	0	0	16403.6	-107.686
mostlyLesion - Sox6	0	0	16403.6	-61.217
Ebf1 - Pcsk6	0	0	16403.6	-67.6309
Pdia5 - Pcsk6	6.53582e-05	6.77789e-05	16403.6	-3.82572
Otx2 - Pcsk6	0	0	16403.6	-69.9413
Fbn2 - Pcsk6	0	0	16403.6	-44.7085
mostlyLesion - Pcsk6	2.52692e-27	2.83015e-27	16403.6	-10.7777
Sox6 - Pcsk6	0	0	16403.6	92.9
Ebf1 - Gad2	3.24636e-40	3.78742e-40	16403.6	-13.2467
Pdia5 - Gad2	0	0	16403.6	57.7928
Otx2 - Gad2	7.01086e-61	8.92292e-61	16403.6	16.4649
Fbn2 - Gad2	9.62555e-54	1.17181e-53	16403.6	15.4274
mostlyLesion - Gad2	2.91959e-293	4.80874e-293	16403.6	37.0931
Sox6 - Gad2	0	0	16403.6	127.657
Pcsk6 - Gad2	0	0	16403.6	63.5332

## Sheet: RES_clusters_CI
comparisons	P	P.adjusted	chi2	T
1 - 10	1.78206e-14	2.16411e-14	16936.1	7.58057
1 - 11	0	0	16936.1	40.5557
10 - 11	1.77822e-247	4.86046e-247	16936.1	33.974
1 - 12	8.00755e-27	1.02597e-26	16936.1	10.6706
10 - 12	0.000456121	0.000496485	16936.1	3.31669
11 - 12	1.19277e-189	2.82914e-189	16936.1	-29.6142
1 - 13	1.88227e-252	5.24477e-252	16936.1	34.3254
10 - 13	2.86529e-165	6.2934e-165	16936.1	27.5872
11 - 13	1.11348e-08	1.28858e-08	16936.1	-5.59525
12 - 13	1.11503e-121	2.14294e-121	16936.1	23.5618
1 - 14	0	0	16936.1	44.2625
10 - 14	0	0	16936.1	38.187
11 - 14	8.60734e-16	1.05119e-15	16936.1	7.96523
12 - 14	3.09401e-249	8.48389e-249	16936.1	34.0986
13 - 14	3.47977e-36	4.71824e-36	16936.1	12.526
1 - 17	0	0	16936.1	55.7809
10 - 17	0	0	16936.1	50.1563
11 - 17	2.16746e-82	3.60963e-82	16936.1	19.2654
12 - 17	0	0	16936.1	45.371
13 - 17	4.0433e-120	7.73618e-120	16936.1	23.4057
14 - 17	1.60326e-18	1.98619e-18	16936.1	8.71083
1 - 19	4.64191e-77	7.61274e-77	16936.1	-18.6095
10 - 19	1.97586e-163	4.29599e-163	16936.1	-27.4287
11 - 19	0	0	16936.1	-65.7328
12 - 19	5.07329e-200	1.23742e-199	16936.1	-30.4383
13 - 19	0	0	16936.1	-57.7379
14 - 19	0	0	16936.1	-67.7751
17 - 19	0	0	16936.1	-82.9082
1 - 2	0.00110185	0.00118884	16936.1	-3.06164
10 - 2	1.46971e-27	1.90003e-27	16936.1	-10.8277
11 - 2	0	0	16936.1	-44.5746
12 - 2	4.42447e-44	6.21447e-44	16936.1	-13.9039
13 - 2	0	3.79394e-308	16936.1	-38.091
14 - 2	0	0	16936.1	-48.0387
17 - 2	0	0	16936.1	-60.0724
19 - 2	1.77891e-54	2.61372e-54	16936.1	15.5372
1 - 20	8.27402e-251	2.28331e-250	16936.1	34.2097
10 - 20	7.43279e-162	1.612e-161	16936.1	27.2922
11 - 20	2.54048e-14	3.07212e-14	16936.1	-7.53432
12 - 20	3.07215e-117	5.82626e-117	16936.1	23.1147
13 - 20	0.0669523	0.069037	16936.1	-1.49893
14 - 20	3.6901e-48	5.26023e-48	16936.1	-14.566
17 - 20	7.30739e-154	1.54207e-153	16936.1	-26.5895
19 - 20	0	0	16936.1	58.5197
2 - 20	0	0	16936.1	38.106
1 - 21	3.08754e-192	7.36391e-192	16936.1	29.8217
10 - 21	1.05558e-114	1.98007e-114	16936.1	22.8555
11 - 21	2.02543e-28	2.63827e-28	16936.1	-11.0086
12 - 21	1.29237e-79	2.13576e-79	16936.1	18.9266
13 - 21	1.63061e-07	1.87444e-07	16936.1	-5.10912
14 - 21	1.10507e-67	1.74261e-67	16936.1	-17.3978
17 - 21	4.47468e-180	1.02739e-179	16936.1	-28.8341
19 - 21	0	0	16936.1	52.7918
2 - 21	3.52725e-241	9.4905e-241	16936.1	33.5244
20 - 21	5.49439e-05	6.04945e-05	16936.1	-3.86829
1 - 22	7.88503e-99	1.40269e-98	16936.1	21.1651
10 - 22	7.82903e-41	1.0768e-40	16936.1	13.3539
11 - 22	6.79855e-140	1.37407e-139	16936.1	-25.3175
12 - 22	5.13637e-21	6.43728e-21	16936.1	9.34172
13 - 22	6.84037e-71	1.08463e-70	16936.1	-17.8214
14 - 22	2.42676e-202	5.98693e-202	16936.1	-30.6199
17 - 22	0	0	16936.1	-45.65
19 - 22	0	0	16936.1	44.9115
2 - 22	2.37212e-136	4.73874e-136	16936.1	24.9852
20 - 22	3.61602e-66	5.63e-66	16936.1	-17.1943
21 - 22	1.83606e-34	2.47007e-34	16936.1	-12.2053
1 - 23	2.51364e-100	4.49947e-100	16936.1	-21.3299
10 - 23	1.09961e-184	2.56576e-184	16936.1	-29.2121
11 - 23	0	0	16936.1	-61.8734
12 - 23	3.10745e-219	7.9392e-219	16936.1	-31.913
13 - 23	0	0	16936.1	-55.4657
14 - 23	0	0	16936.1	-64.377
17 - 23	0	0	16936.1	-76.101
19 - 23	1.06738e-06	1.21082e-06	16936.1	-4.74138
2 - 23	9.29169e-77	1.52094e-76	16936.1	-18.5717
20 - 23	0	0	16936.1	-55.8428
21 - 23	0	0	16936.1	-51.2156
22 - 23	0	0	16936.1	-44.0478
1 - 26	5.1176e-31	6.7477e-31	16936.1	11.5379
10 - 26	3.62549e-06	4.05922e-06	16936.1	4.48717
11 - 26	5.13745e-154	1.08682e-153	16936.1	-26.6031
12 - 26	0.0993303	0.101693	16936.1	1.28541
13 - 26	9.46129e-98	1.67962e-97	16936.1	-21.0454
14 - 26	2.47978e-209	6.22476e-209	16936.1	-31.161
17 - 26	0	0	16936.1	-41.3487
19 - 26	9.60091e-202	2.3551e-201	16936.1	30.5733
2 - 26	9.53083e-49	1.36313e-48	16936.1	14.659
20 - 26	6.42928e-93	1.1138e-92	16936.1	-20.5015
21 - 26	3.38161e-62	5.17153e-62	16936.1	-16.6495
22 - 26	7.28094e-14	8.77996e-14	16936.1	-7.39536
23 - 26	1.09734e-221	2.8458e-221	16936.1	32.0967
1 - 27	0	0	16936.1	50.8513
10 - 27	0	0	16936.1	45.0325
11 - 27	1.19191e-49	1.71038e-49	16936.1	14.8008
12 - 27	0	0	16936.1	40.6375
13 - 27	6.13285e-81	1.01938e-80	16936.1	19.089
14 - 27	8.08907e-09	9.37374e-09	16936.1	5.6505
17 - 27	0.00250486	0.00267911	16936.1	-2.80667
19 - 27	0	0	16936.1	75.9344
2 - 27	0	0	16936.1	54.8529
20 - 27	2.71262e-103	4.92736e-103	16936.1	21.6532
21 - 27	7.3413e-128	1.43656e-127	16936.1	24.1712
22 - 27	0	0	16936.1	38.9152
23 - 27	0	0	16936.1	70.959
26 - 27	1.13884e-294	3.47709e-294	16936.1	37.1861
1 - 28	0	0	16936.1	53.2052
10 - 28	0	0	16936.1	47.4038
11 - 28	1.07438e-56	1.5949e-56	16936.1	15.8646
12 - 28	0	0	16936.1	42.6842
13 - 28	4.12254e-91	7.08485e-91	16936.1	20.2945
14 - 28	4.04281e-09	4.70387e-09	16936.1	5.76871
17 - 28	0.000246965	0.00027053	16936.1	-3.4845
19 - 28	0	0	16936.1	80.043
2 - 28	0	0	16936.1	57.4566
20 - 28	1.26275e-118	2.40005e-118	16936.1	23.2551
21 - 28	2.03103e-144	4.19356e-144	16936.1	25.736
22 - 28	0	0	16936.1	42.1413
23 - 28	0	0	16936.1	73.7245
26 - 28	0	0	16936.1	38.8327
27 - 28	0.368813	0.370967	16936.1	-0.335003
1 - 29	9.15828e-85	1.5341e-84	16936.1	-19.5507
10 - 29	1.03586e-163	2.25791e-163	16936.1	-27.453
11 - 29	0	0	16936.1	-60.3663
12 - 29	6.39532e-197	1.53809e-196	16936.1	-30.1941
13 - 29	0	0	16936.1	-53.9093
14 - 29	0	0	16936.1	-62.9387
17 - 29	0	0	16936.1	-74.7763
19 - 29	0.00311432	0.0033186	16936.1	-2.73574
2 - 29	5.61395e-63	8.63145e-63	16936.1	-16.7578
20 - 29	0	0	16936.1	-54.2674
21 - 29	0	0	16936.1	-49.6133
22 - 29	0	0	16936.1	-42.313
23 - 29	0.0307669	0.0319931	16936.1	1.86973
26 - 29	7.84385e-200	1.90778e-199	16936.1	-30.4235
27 - 29	0	0	16936.1	-69.5821
28 - 29	0	0	16936.1	-72.3674
1 - 30	1.0984e-13	1.32269e-13	16936.1	7.34041
10 - 30	0.154111	0.156844	16936.1	-1.01898
11 - 30	0	0	16936.1	-40.5035
12 - 30	1.53923e-06	1.73693e-06	16936.1	-4.66661
13 - 30	4.82679e-227	1.27091e-226	16936.1	-32.4948
14 - 30	0	0	16936.1	-44.3069
17 - 30	0	0	16936.1	-60.0109
19 - 30	1.14704e-185	2.69837e-185	16936.1	29.292
2 - 30	6.42425e-28	8.33024e-28	16936.1	10.9036
20 - 30	7.41243e-228	1.9577e-227	16936.1	-32.5549
21 - 30	5.18494e-159	1.11328e-158	16936.1	-27.0442
22 - 30	8.28432e-62	1.26244e-61	16936.1	-16.5952
23 - 30	3.63863e-203	9.02843e-203	16936.1	30.6841
26 - 30	2.18356e-09	2.54404e-09	16936.1	-5.87181
27 - 30	0	0	16936.1	-52.8195
28 - 30	0	0	16936.1	-56.6928
29 - 30	5.76116e-180	1.31924e-179	16936.1	28.825
1 - 31	1.51018e-42	2.09046e-42	16936.1	-13.647
10 - 31	2.49313e-103	4.53823e-103	16936.1	-21.6571
11 - 31	0	0	16936.1	-55.7086
12 - 31	7.98487e-132	1.5841e-131	16936.1	-24.5544
13 - 31	0	0	16936.1	-49.0054
14 - 31	0	0	16936.1	-58.5051
17 - 31	0	0	16936.1	-70.9061
19 - 31	2.4805e-05	2.75221e-05	16936.1	4.05819
2 - 31	4.81537e-27	6.17888e-27	16936.1	-10.7179
20 - 31	0	0	16936.1	-49.313
21 - 31	0	0	16936.1	-44.5156
22 - 31	2.13599e-287	6.36361e-287	16936.1	-36.7075
23 - 31	1.57802e-16	1.9382e-16	16936.1	8.17294
26 - 31	6.50302e-136	1.29609e-135	16936.1	-24.9438
27 - 31	0	0	16936.1	-65.4392
28 - 31	0	0	16936.1	-68.3583
29 - 31	1.53173e-10	1.80413e-10	16936.1	6.29818
30 - 31	5.21373e-113	9.73757e-113	16936.1	-22.6809
1 - 33	3.04201e-89	5.19677e-89	16936.1	-20.0783
10 - 33	2.85745e-175	6.4574e-175	16936.1	-28.435
11 - 33	0	0	16936.1	-63.8396
12 - 33	5.37277e-211	1.36057e-210	16936.1	-31.2886
13 - 33	0	0	16936.1	-56.6806
14 - 33	0	0	16936.1	-66.1482
17 - 33	0	0	16936.1	-79.4646
19 - 33	0.00636497	0.00672422	16936.1	-2.49142
2 - 33	6.0566e-66	9.41288e-66	16936.1	-17.164
20 - 33	0	0	16936.1	-57.2438
21 - 33	0	0	16936.1	-52.0922
22 - 33	0	0	16936.1	-44.5673
23 - 33	0.0111204	0.0116764	16936.1	2.28638
26 - 33	4.87177e-213	1.23734e-212	16936.1	-31.4445
27 - 33	0	0	16936.1	-73.4791
28 - 33	0	0	16936.1	-76.8568
29 - 33	0.365111	0.367673	16936.1	0.344835
30 - 33	7.82898e-196	1.87765e-195	16936.1	-30.108
31 - 33	2.57152e-10	3.01646e-10	16936.1	-6.21723
1 - 37	0.00126863	0.00136707	16936.1	-3.01918
10 - 37	3.5064e-30	4.59514e-30	16936.1	-11.3702
11 - 37	0	0	16936.1	-48.8452
12 - 37	1.00376e-48	1.43323e-48	16936.1	-14.6555
13 - 37	0	0	16936.1	-41.2935
14 - 37	0	0	16936.1	-52.0114
17 - 37	0	0	16936.1	-66.4051
19 - 37	2.88393e-64	4.44197e-64	16936.1	16.9355
2 - 37	0.401333	0.4018	16936.1	0.249901
20 - 37	0	0	16936.1	-41.5665
21 - 37	1.2497e-280	3.64744e-280	16936.1	-36.2572
22 - 37	1.32925e-160	2.86838e-160	16936.1	-27.1832
23 - 37	1.577e-87	2.66235e-87	16936.1	19.8779
26 - 37	1.60841e-53	2.35117e-53	16936.1	-15.394
27 - 37	0	0	16936.1	-59.9035
28 - 37	0	0	16936.1	-63.4437
29 - 37	3.94721e-72	6.34058e-72	16936.1	17.9823
30 - 37	2.25394e-31	2.9856e-31	16936.1	-11.6086
31 - 37	1.38398e-31	1.83607e-31	16936.1	11.6505
33 - 37	1.99074e-76	3.25243e-76	16936.1	18.5302
1 - 38	2.13267e-95	3.74741e-95	16936.1	20.7823
10 - 38	3.83224e-45	5.40912e-45	16936.1	14.0793
11 - 38	1.17212e-57	1.75208e-57	16936.1	-16.0046
12 - 38	3.58931e-27	4.61253e-27	16936.1	10.7452
13 - 38	1.00344e-27	1.29919e-27	16936.1	-10.8628
14 - 38	9.12372e-100	1.62978e-99	16936.1	-21.2684
17 - 38	6.68638e-203	1.6543e-202	16936.1	-30.6636
19 - 38	0	0	16936.1	40.4178
2 - 38	5.17134e-126	1.00736e-125	16936.1	23.9906
20 - 38	9.98362e-24	1.2641e-23	16936.1	-9.9836
21 - 38	4.64763e-11	5.49671e-11	16936.1	-6.48087
22 - 38	0.000347866	0.000379611	16936.1	3.39169
23 - 38	0	0	16936.1	40.9187
26 - 38	4.57264e-20	5.68937e-20	16936.1	9.10656
27 - 38	2.98565e-158	6.36297e-158	16936.1	-26.9775
28 - 38	8.32686e-172	1.85256e-171	16936.1	-28.144
29 - 38	0	0	16936.1	39.3192
30 - 38	1.37103e-60	2.07828e-60	16936.1	16.4239
31 - 38	7.31397e-250	2.01193e-249	16936.1	34.1429
33 - 38	0	0	16936.1	40.7789
37 - 38	1.19831e-140	2.43335e-140	16936.1	25.3877
1 - 39	6.31202e-93	1.0957e-92	16936.1	20.5024
10 - 39	2.66026e-40	3.64727e-40	16936.1	13.2618
11 - 39	1.51768e-93	2.63984e-93	16936.1	-20.5728
12 - 39	3.41642e-22	4.30049e-22	16936.1	9.62549
13 - 39	1.63937e-47	2.33305e-47	16936.1	-14.4628
14 - 39	1.70166e-146	3.53043e-146	16936.1	-25.926
17 - 39	3.72413e-300	1.15341e-299	16936.1	-37.5434
19 - 39	0	0	16936.1	41.9753
2 - 39	5.53285e-126	1.07535e-125	16936.1	23.9877
20 - 39	1.05953e-42	1.47139e-42	16936.1	-13.673
21 - 39	7.3845e-22	9.28184e-22	16936.1	-9.54562
22 - 39	0.0909045	0.0932881	16936.1	1.33524
23 - 39	0	0	16936.1	41.9749
26 - 39	1.94928e-15	2.37724e-15	16936.1	7.86326
27 - 39	8.00935e-230	2.12186e-229	16936.1	-32.6996
28 - 39	1.02468e-256	2.86443e-256	16936.1	-34.6239
29 - 39	0	0	16936.1	40.3024
30 - 39	3.80992e-57	5.67533e-57	16936.1	15.9302
31 - 39	1.61879e-260	4.56978e-260	16936.1	34.8882
33 - 39	0	0	16936.1	42.0827
37 - 39	7.54398e-144	1.55392e-143	16936.1	25.6837
38 - 39	0.0217302	0.0226784	16936.1	-2.01936
1 - 4	5.76536e-111	1.07445e-110	16936.1	22.4685
10 - 4	3.8045e-53	5.5426e-53	16936.1	15.3376
11 - 4	7.3562e-73	1.18608e-72	16936.1	-18.0765
12 - 4	9.97371e-32	1.32521e-31	16936.1	11.6785
13 - 4	5.09338e-34	6.82021e-34	16936.1	-12.1215
14 - 4	2.72457e-122	5.248e-122	16936.1	-23.6228
17 - 4	4.04451e-261	1.14928e-260	16936.1	-34.9299
19 - 4	0	0	16936.1	44.0261
2 - 4	6.27187e-147	1.30752e-146	16936.1	25.9655
20 - 4	1.632e-29	2.13225e-29	16936.1	-11.2345
21 - 4	2.50481e-13	3.00787e-13	16936.1	-7.22902
22 - 4	7.68822e-05	8.4541e-05	16936.1	3.78551
23 - 4	0	0	16936.1	43.7855
26 - 4	4.58293e-23	5.78579e-23	16936.1	9.83067
27 - 4	7.42152e-198	1.7899e-197	16936.1	-30.268
28 - 4	9.89036e-221	2.54197e-220	16936.1	-32.0253
29 - 4	0	0	16936.1	42.134
30 - 4	3.13707e-74	5.1059e-74	16936.1	18.252
31 - 4	7.36794e-289	2.21038e-288	16936.1	36.8042
33 - 4	0	0	16936.1	44.0119
37 - 4	5.13467e-168	1.13358e-167	16936.1	27.8225
38 - 4	0.490905	0.490905	16936.1	-0.0228004
39 - 4	0.0139593	0.0146217	16936.1	2.19856
1 - 40	1.48194e-64	2.28665e-64	16936.1	16.9751
10 - 40	1.05318e-22	1.32766e-22	16936.1	9.74619
11 - 40	1.92733e-119	3.67131e-119	16936.1	-23.3375
12 - 40	1.91319e-10	2.24728e-10	16936.1	6.26356
13 - 40	2.18325e-67	3.43653e-67	16936.1	-17.3583
14 - 40	2.68415e-174	6.03407e-174	16936.1	-28.3536
17 - 40	0	0	16936.1	-39.5793
19 - 40	4.27148e-301	1.33252e-300	16936.1	37.6044
2 - 40	1.80775e-91	3.11918e-91	16936.1	20.3356
20 - 40	1.75984e-62	2.70093e-62	16936.1	-16.689
21 - 40	1.25349e-36	1.7023e-36	16936.1	-12.6073
22 - 40	0.00978448	0.0102988	16936.1	-2.33467
23 - 40	0	0	16936.1	38.225
26 - 40	1.3361e-06	1.50969e-06	16936.1	4.69565
27 - 40	6.39928e-261	1.81243e-260	16936.1	-34.9161
28 - 40	1.01532e-288	3.03537e-288	16936.1	-36.795
29 - 40	6.68492e-285	1.97791e-284	16936.1	36.542
30 - 40	1.05379e-32	1.40451e-32	16936.1	11.8691
31 - 40	4.41734e-208	1.10241e-207	16936.1	31.0648
33 - 40	1.2128e-307	3.85323e-307	16936.1	38.0264
37 - 40	3.92709e-103	7.11837e-103	16936.1	21.6358
38 - 40	3.82672e-07	4.38139e-07	16936.1	-4.94531
39 - 40	0.000543271	0.000588373	16936.1	-3.2675
4 - 40	3.57693e-08	4.12834e-08	16936.1	-5.38894
1 - 41	2.0032e-05	2.22837e-05	16936.1	-4.10787
10 - 41	4.36161e-34	5.84946e-34	16936.1	-12.1343
11 - 41	0	0	16936.1	-47.3592
12 - 41	9.97682e-53	1.44857e-52	16936.1	-15.2743
13 - 41	0	0	16936.1	-40.4477
14 - 41	0	0	16936.1	-50.6513
17 - 41	0	0	16936.1	-63.6066
19 - 41	1.69848e-50	2.44957e-50	16936.1	14.9325
2 - 41	0.1641	0.166616	16936.1	-0.977766
20 - 41	0	0	16936.1	-40.5888
21 - 41	1.83448e-272	5.3003e-272	16936.1	-35.707
22 - 41	6.88611e-159	1.47486e-158	16936.1	-27.0334
23 - 41	1.04046e-72	1.67447e-72	16936.1	18.0571
26 - 41	1.62737e-57	2.42836e-57	16936.1	-15.9839
27 - 41	0	0	16936.1	-57.8873
28 - 41	0	0	16936.1	-60.8673
29 - 41	4.90841e-59	7.37547e-59	16936.1	16.203
30 - 41	2.19896e-35	2.96756e-35	16936.1	-12.3779
31 - 41	7.2787e-24	9.24331e-24	16936.1	10.015
33 - 41	6.5148e-62	9.94547e-62	16936.1	16.6097
37 - 41	0.0959683	0.0983675	16936.1	-1.30491
38 - 41	1.4445e-142	2.96829e-142	16936.1	-25.5655
39 - 41	1.19287e-144	2.46891e-144	16936.1	-25.7572
4 - 41	1.17279e-167	2.58254e-167	16936.1	-27.7919
40 - 41	6.95748e-106	1.27455e-105	16936.1	-21.9317
1 - 42	1.4581e-88	2.47619e-88	16936.1	-19.999
10 - 42	1.40561e-168	3.11113e-168	16936.1	-27.8704
11 - 42	0	0	16936.1	-60.5797
12 - 42	5.16732e-202	1.27116e-201	16936.1	-30.5943
13 - 42	0	0	16936.1	-54.1733
14 - 42	0	0	16936.1	-63.1459
17 - 42	0	0	16936.1	-74.8749
19 - 42	0.000503207	0.00054567	16936.1	-3.28913
2 - 42	2.23944e-66	3.49938e-66	16936.1	-17.2224
20 - 42	0	0	16936.1	-54.5262
21 - 42	0	0	16936.1	-49.9059
22 - 42	0	0	16936.1	-42.6551
23 - 42	0.0895996	0.0921688	16936.1	1.34326
26 - 42	7.52637e-205	1.87289e-204	16936.1	-30.8151
27 - 42	0	0	16936.1	-69.7359
28 - 42	0	0	16936.1	-72.4854
29 - 42	0.300718	0.303183	16936.1	-0.522344
30 - 42	3.37882e-185	7.90533e-185	16936.1	-29.2538
31 - 42	5.10512e-12	6.0964e-12	16936.1	-6.80684
33 - 42	0.187658	0.189863	16936.1	-0.886576
37 - 42	6.99982e-76	1.14145e-75	16936.1	-18.4614
38 - 42	0	0	16936.1	-39.6661
39 - 42	0	0	16936.1	-40.6522
4 - 42	0	0	16936.1	-42.4726
40 - 42	1.78075e-290	5.39868e-290	16936.1	-36.9108
41 - 42	2.09234e-62	3.20553e-62	16936.1	-16.6785
1 - 43	1.61132e-79	2.65775e-79	16936.1	-18.9148
10 - 43	6.33337e-164	1.38402e-163	16936.1	-27.4714
11 - 43	0	0	16936.1	-64.1595
12 - 43	1.38808e-199	3.36659e-199	16936.1	-30.404
13 - 43	0	0	16936.1	-56.6418
14 - 43	0	0	16936.1	-66.388
17 - 43	0	0	16936.1	-80.4837
19 - 43	0.205133	0.2073	16936.1	-0.82344
2 - 43	4.29667e-57	6.38935e-57	16936.1	-15.9226
20 - 43	0	0	16936.1	-57.2863
21 - 43	0	0	16936.1	-51.8896
22 - 43	0	0	16936.1	-44.168
23 - 43	4.93317e-05	5.44546e-05	16936.1	3.89451
26 - 43	1.15111e-201	2.81564e-201	16936.1	-30.5671
27 - 43	0	0	16936.1	-74.0796
28 - 43	0	0	16936.1	-77.759
29 - 43	0.0270648	0.0281775	16936.1	1.92589
30 - 43	2.23702e-184	5.2056e-184	16936.1	-29.1869
31 - 43	1.11673e-06	1.26513e-06	16936.1	-4.73221
33 - 43	0.0498063	0.0515423	16936.1	1.6468
37 - 43	9.2643e-67	1.45028e-66	16936.1	-17.2741
38 - 43	0	0	16936.1	-40.1399
39 - 43	0	0	16936.1	-41.5224
4 - 43	0	0	16936.1	-43.5095
40 - 43	6.5699e-297	2.02024e-296	16936.1	-37.3323
41 - 43	4.05025e-53	5.89065e-53	16936.1	-15.3335
42 - 43	0.00673605	0.00710752	16936.1	2.47122
1 - 44	4.01381e-51	5.79848e-51	16936.1	-15.0292
10 - 44	6.83118e-117	1.29267e-116	16936.1	-23.0794
11 - 44	0	0	16936.1	-57.2245
12 - 44	7.67492e-147	1.59616e-146	16936.1	-25.9575
13 - 44	0	0	16936.1	-50.4789
14 - 44	0	0	16936.1	-59.9349
17 - 44	0	0	16936.1	-72.4144
19 - 44	0.00486703	0.00515438	16936.1	2.58534
2 - 44	5.60777e-34	7.49734e-34	16936.1	-12.1135
20 - 44	0	0	16936.1	-50.8261
21 - 44	0	0	16936.1	-45.9916
22 - 44	0	0	16936.1	-38.2655
23 - 44	4.19578e-12	5.01746e-12	16936.1	6.83507
26 - 44	1.23288e-150	2.58905e-150	16936.1	-26.3008
27 - 44	0	0	16936.1	-66.8994
28 - 44	0	0	16936.1	-69.8701
29 - 44	3.71233e-07	4.26176e-07	16936.1	4.95122
30 - 44	2.12582e-128	4.18841e-128	16936.1	-24.2236
31 - 44	0.0831106	0.085596	16936.1	-1.38449
33 - 44	7.55723e-07	8.60685e-07	16936.1	4.81092
37 - 44	1.47867e-39	2.02407e-39	16936.1	-13.1316
38 - 44	2.49414e-269	7.18213e-269	16936.1	-35.4938
39 - 44	7.94633e-282	2.33508e-281	16936.1	-36.3372
4 - 44	0	0	16936.1	-38.248
40 - 44	6.25902e-227	1.638e-226	16936.1	-32.4864
41 - 44	1.5094e-30	1.98411e-30	16936.1	-11.4439
42 - 44	2.32804e-08	2.69052e-08	16936.1	5.46571
43 - 44	0.000492959	0.00053523	16936.1	3.29492
1 - 45	0	0	16936.1	42.9021
10 - 45	6.40313e-291	1.94809e-290	16936.1	36.94
11 - 45	1.53275e-16	1.88528e-16	16936.1	8.17646
12 - 45	3.99603e-235	1.0652e-234	16936.1	33.087
13 - 45	6.78852e-36	9.19011e-36	16936.1	12.4725
14 - 45	0.23638	0.238597	16936.1	0.718007
17 - 45	2.48318e-13	2.98606e-13	16936.1	-7.2302
19 - 45	0	0	16936.1	65.0974
2 - 45	0	0	16936.1	46.4849
20 - 45	1.00001e-46	1.41847e-46	16936.1	14.3368
21 - 45	3.97036e-65	6.14834e-65	16936.1	17.0532
22 - 45	1.98832e-185	4.6647e-185	16936.1	29.2726
23 - 45	0	0	16936.1	62.4916
26 - 45	2.07278e-199	5.01311e-199	16936.1	30.3903
27 - 45	3.15998e-06	3.54264e-06	16936.1	-4.51639
28 - 45	3.05576e-06	3.43026e-06	16936.1	-4.5235
29 - 45	0	0	16936.1	61.0599
30 - 45	0	0	16936.1	42.2739
31 - 45	0	0	16936.1	56.613
33 - 45	0	0	16936.1	63.8884
37 - 45	0	0	16936.1	49.9248
38 - 45	1.20797e-96	2.13565e-96	16936.1	20.9221
39 - 45	2.25642e-138	4.54984e-138	16936.1	25.1753
4 - 45	4.01632e-116	7.56685e-116	16936.1	23.0009
40 - 45	7.43865e-165	1.62969e-164	16936.1	27.5516
41 - 45	0	0	16936.1	48.861
42 - 45	0	0	16936.1	61.2854
43 - 45	0	0	16936.1	63.9599
44 - 45	0	0	16936.1	57.9929
1 - 46	0.400973	0.401906	16936.1	-0.250833
10 - 46	8.70166e-17	1.07184e-16	16936.1	-8.24462
11 - 46	0	0	16936.1	-43.7846
12 - 46	9.5793e-31	1.26113e-30	16936.1	-11.4835
13 - 46	2.29652e-289	6.91364e-289	16936.1	-36.8376
14 - 46	0	0	16936.1	-47.3216
17 - 46	0	0	16936.1	-60.412
19 - 46	7.76241e-83	1.29775e-82	16936.1	19.3193
2 - 46	0.0015488	0.0016669	16936.1	2.95818
20 - 46	4.30375e-290	1.30019e-289	16936.1	-36.8856
21 - 46	1.6659e-220	4.26887e-220	16936.1	-32.0084
22 - 46	1.04888e-115	1.97181e-115	16936.1	-22.9583
23 - 46	2.20777e-106	4.06173e-106	16936.1	21.9849
26 - 46	3.45353e-35	4.65335e-35	16936.1	-12.3414
27 - 46	0	0	16936.1	-54.6391
28 - 46	0	0	16936.1	-57.6011
29 - 46	7.93073e-90	1.35753e-89	16936.1	20.1461
30 - 46	2.7642e-16	3.38065e-16	16936.1	-8.10487
31 - 46	7.6163e-45	1.07151e-44	16936.1	14.0303
33 - 46	2.75639e-95	4.83351e-95	16936.1	20.7697
37 - 46	0.00176896	0.00190146	16936.1	2.91696
38 - 46	4.79741e-107	8.86388e-107	16936.1	-22.0555
39 - 46	2.81663e-106	5.17083e-106	16936.1	-21.9736
4 - 46	1.18662e-126	2.31673e-126	16936.1	-24.0532
40 - 46	1.30525e-73	2.11642e-73	16936.1	-18.1729
41 - 46	2.4708e-05	2.74498e-05	16936.1	4.05911
42 - 46	7.83812e-94	1.36612e-93	16936.1	20.6054
43 - 46	4.01455e-85	6.73787e-85	16936.1	19.5934
44 - 46	4.73652e-54	6.94743e-54	16936.1	15.4736
45 - 46	0	0	16936.1	-45.6061
1 - 5	3.0631e-66	4.77776e-66	16936.1	-17.2041
10 - 5	1.53822e-148	3.21459e-148	16936.1	-26.1117
11 - 5	0	0	16936.1	-65.1431
12 - 5	2.78507e-184	6.46347e-184	16936.1	-29.1792
13 - 5	0	0	16936.1	-56.943
14 - 5	0	0	16936.1	-67.1712
17 - 5	0	0	16936.1	-82.7723
19 - 5	0.0395022	0.0409776	16936.1	1.75657
2 - 5	3.87457e-45	5.4599e-45	16936.1	-14.0785
20 - 5	0	0	16936.1	-57.7565
21 - 5	0	0	16936.1	-51.8955
22 - 5	0	0	16936.1	-43.8512
23 - 5	9.95395e-11	1.17402e-10	16936.1	6.36478
26 - 5	2.39779e-186	5.65615e-186	16936.1	-29.3472
27 - 5	0	0	16936.1	-75.5431
28 - 5	0	0	16936.1	-79.8296
29 - 5	6.81214e-06	7.61721e-06	16936.1	4.35073
30 - 5	3.4311e-169	7.61386e-169	16936.1	-27.9225
31 - 5	0.00676306	0.00712728	16936.1	-2.46979
33 - 5	1.4226e-05	1.58455e-05	16936.1	4.18632
37 - 5	1.2688e-53	1.85789e-53	16936.1	-15.4095
38 - 5	0	0	16936.1	-39.3322
39 - 5	0	0	16936.1	-40.8783
4 - 5	0	0	16936.1	-42.9666
40 - 5	1.94123e-283	5.72396e-283	16936.1	-36.4447
41 - 5	2.79076e-41	3.84454e-41	16936.1	-13.4311
42 - 5	4.77636e-07	5.45417e-07	16936.1	4.90191
43 - 5	0.0055246	0.00584358	16936.1	2.54134
44 - 5	0.163652	0.166356	16936.1	-0.979581
45 - 5	0	0	16936.1	-64.414
46 - 5	3.14062e-71	5.01683e-71	16936.1	-17.8654
1 - 50	0.100998	0.103277	16936.1	1.27592
10 - 50	3.88974e-12	4.65795e-12	16936.1	-6.84594
11 - 50	0	0	16936.1	-43.4634
12 - 50	1.3558e-24	1.72684e-24	16936.1	-10.1806
13 - 50	3.52719e-280	1.02598e-279	16936.1	-36.227
14 - 50	0	0	16936.1	-47.0289
17 - 50	0	0	16936.1	-60.794
19 - 50	3.97569e-101	7.14628e-101	16936.1	21.4176
2 - 50	2.4394e-06	2.74194e-06	16936.1	4.57097
20 - 50	2.89519e-281	8.47876e-281	16936.1	-36.2997
21 - 50	2.33373e-210	5.89249e-210	16936.1	-31.2397
22 - 50	1.90694e-105	3.48594e-105	16936.1	-21.8849
23 - 50	1.42719e-124	2.76759e-124	16936.1	23.8488
26 - 50	7.3344e-29	9.56805e-29	16936.1	-11.1003
27 - 50	0	0	16936.1	-54.66
28 - 50	0	0	16936.1	-57.8613
29 - 50	1.68913e-106	3.11421e-106	16936.1	21.9973
30 - 50	2.58495e-11	3.06141e-11	16936.1	-6.56896
31 - 50	1.48566e-56	2.20163e-56	16936.1	15.844
33 - 50	1.02207e-113	1.91305e-113	16936.1	22.754
37 - 50	1.57853e-06	1.77895e-06	16936.1	4.66142
38 - 50	1.15646e-97	2.04879e-97	16936.1	-21.0357
39 - 50	1.6357e-96	2.88594e-96	16936.1	-20.9074
4 - 50	1.41712e-116	2.67575e-116	16936.1	-23.0471
40 - 50	7.01794e-65	1.08482e-64	16936.1	-17.0195
41 - 50	4.60137e-09	5.33933e-09	16936.1	5.74683
42 - 50	8.15395e-111	1.51632e-110	16936.1	22.4527
43 - 50	5.40989e-103	9.78554e-103	16936.1	21.6207
44 - 50	4.62208e-67	7.26206e-67	16936.1	17.3146
45 - 50	0	0	16936.1	-45.2088
46 - 50	0.0527993	0.054574	16936.1	1.61836
5 - 50	2.57225e-88	4.35965e-88	16936.1	19.9702
1 - 52	0	0	16936.1	47.6222
10 - 52	0	0	16936.1	41.6677
11 - 52	2.46504e-30	3.23537e-30	16936.1	11.4011
12 - 52	2.39107e-298	7.37891e-298	16936.1	37.426
13 - 52	1.56523e-56	2.31557e-56	16936.1	15.8407
14 - 52	0.0021167	0.00226959	16936.1	2.8605
17 - 52	4.58837e-09	5.33142e-09	16936.1	-5.74731
19 - 52	0	0	16936.1	71.9229
2 - 52	0	0	16936.1	51.5119
20 - 52	2.6709e-73	4.32265e-73	16936.1	18.133
21 - 52	9.80233e-96	1.72593e-95	16936.1	20.8202
22 - 52	4.64366e-259	1.3066e-258	16936.1	34.787
23 - 52	0	0	16936.1	67.7453
26 - 52	3.69581e-251	1.02648e-250	16936.1	34.2343
27 - 52	0.0025642	0.00273917	16936.1	-2.79911
28 - 52	0.00341477	0.00362977	16936.1	-2.70528
29 - 52	0	0	16936.1	66.3367
30 - 52	0	0	16936.1	48.5997
31 - 52	0	0	16936.1	62.0445
33 - 52	0	0	16936.1	69.8882
37 - 52	0	0	16936.1	56.0145
38 - 52	6.06196e-128	1.18892e-127	16936.1	24.1793
39 - 52	1.69603e-186	4.01177e-186	16936.1	29.3594
4 - 52	2.06434e-158	4.41041e-158	16936.1	26.9916
40 - 52	3.07428e-216	7.83123e-216	16936.1	31.6873
41 - 52	0	0	16936.1	54.3334
42 - 52	0	0	16936.1	66.5176
43 - 52	0	0	16936.1	70.3056
44 - 52	0	0	16936.1	63.4902
45 - 52	0.0261052	0.0272114	16936.1	1.94149
46 - 52	0	0	16936.1	51.0406
5 - 52	0	0	16936.1	71.4222
50 - 52	0	0	16936.1	50.9002
1 - 53	7.18276e-67	1.12648e-66	16936.1	-17.2889
10 - 53	1.54948e-141	3.16138e-141	16936.1	-25.4702
11 - 53	0	0	16936.1	-60.1448
12 - 53	4.33714e-174	9.72469e-174	16936.1	-28.3361
13 - 53	0	0	16936.1	-53.2245
14 - 53	0	0	16936.1	-62.6809
17 - 53	0	0	16936.1	-75.5129
19 - 53	0.380306	0.382081	16936.1	0.30468
2 - 53	5.77177e-47	8.20049e-47	16936.1	-14.3752
20 - 53	0	0	16936.1	-53.6648
21 - 53	0	0	16936.1	-48.6957
22 - 53	0	0	16936.1	-41.0609
23 - 53	8.4912e-07	9.65776e-07	16936.1	4.78756
26 - 53	3.2571e-177	7.39937e-177	16936.1	-28.597
27 - 53	0	0	16936.1	-69.7995
28 - 53	0	0	16936.1	-72.9428
29 - 53	0.00199771	0.00214467	16936.1	2.8788
30 - 53	9.47575e-157	2.00951e-156	16936.1	-26.8453
31 - 53	0.000189527	0.000207876	16936.1	-3.55476
33 - 53	0.00405839	0.00430329	16936.1	2.64739
37 - 53	1.54461e-54	2.27335e-54	16936.1	-15.5463
38 - 53	7.23415e-305	2.27321e-304	16936.1	-37.848
39 - 53	0	0	16936.1	-38.892
4 - 53	0	0	16936.1	-40.8099
40 - 53	1.84767e-261	5.2852e-261	16936.1	-34.9534
41 - 53	3.36374e-43	4.69397e-43	16936.1	-13.7568
42 - 53	0.000331092	0.000361764	16936.1	3.40522
43 - 53	0.141434	0.144112	16936.1	1.07392
44 - 53	0.0153441	0.0160525	16936.1	-2.16122
45 - 53	0	0	16936.1	-60.6026
46 - 53	4.75205e-71	7.54892e-71	16936.1	-17.842
5 - 53	0.090162	0.0926366	16936.1	-1.3398
50 - 53	2.11536e-86	3.56424e-86	16936.1	-19.7451
52 - 53	0	0	16936.1	-66.3139
1 - 54	0	0	16936.1	39.5678
10 - 54	5.93939e-241	1.59309e-240	16936.1	33.5082
11 - 54	1.04178e-06	1.18334e-06	16936.1	4.7463
12 - 54	1.27454e-191	3.03143e-191	16936.1	29.7725
13 - 54	3.25874e-20	4.06046e-20	16936.1	9.14338
14 - 54	0.0113078	0.0118588	16936.1	-2.28001
17 - 54	2.15009e-25	2.74255e-25	16936.1	-10.359
19 - 54	0	0	16936.1	61.1614
2 - 54	0	0	16936.1	43.0625
20 - 54	1.57643e-27	2.03189e-27	16936.1	10.8213
21 - 54	1.46167e-42	2.02657e-42	16936.1	13.6494
22 - 54	3.82423e-140	7.74744e-140	16936.1	25.3408
23 - 54	0	0	16936.1	59.1575
26 - 54	1.10313e-161	2.38642e-161	16936.1	27.2773
27 - 54	2.59485e-14	3.13347e-14	16936.1	-7.53155
28 - 54	6.22542e-15	7.58145e-15	16936.1	-7.71617
29 - 54	0	0	16936.1	57.7015
30 - 54	0	0	16936.1	38.2484
31 - 54	0	0	16936.1	53.1412
33 - 54	0	0	16936.1	60.2605
37 - 54	0	0	16936.1	46.1014
38 - 54	9.7817e-72	1.56544e-71	16936.1	17.9313
39 - 54	2.14215e-104	3.9076e-104	16936.1	21.7721
4 - 54	1.47102e-85	2.47373e-85	16936.1	19.6453
40 - 54	1.92962e-128	3.81055e-128	16936.1	24.2276
41 - 54	0	0	16936.1	45.2776
42 - 54	0	0	16936.1	57.9483
43 - 54	0	0	16936.1	60.1961
44 - 54	0	0	16936.1	54.5088
45 - 54	0.00234568	0.00251198	16936.1	-2.82776
46 - 54	0	0	16936.1	41.9944
5 - 54	0	0	16936.1	60.4028
50 - 54	0	0	16936.1	41.4833
52 - 54	3.71647e-07	4.26082e-07	16936.1	-4.951
53 - 54	0	0	16936.1	57.0578
1 - 60	4.63879e-10	5.42663e-10	16936.1	-6.12381
10 - 60	2.91617e-50	4.1987e-50	16936.1	-14.896
11 - 60	0	0	16936.1	-54.714
12 - 60	4.70623e-74	7.64541e-74	16936.1	-18.2295
13 - 60	0	0	16936.1	-46.4054
14 - 60	0	0	16936.1	-57.3799
17 - 60	0	0	16936.1	-73.4195
19 - 60	3.30667e-46	4.68264e-46	16936.1	14.2528
2 - 60	0.00264575	0.00282279	16936.1	-2.78898
20 - 60	0	0	16936.1	-46.9716
21 - 60	0	0	16936.1	-41.1229
22 - 60	3.2321e-221	8.35688e-221	16936.1	-32.0617
23 - 60	1.08673e-68	1.71999e-68	16936.1	17.5319
26 - 60	9.80245e-79	1.61375e-78	16936.1	-18.818
27 - 60	0	0	16936.1	-65.9832
28 - 60	0	0	16936.1	-70.2737
29 - 60	1.05602e-54	1.5569e-54	16936.1	15.5709
30 - 60	5.17399e-55	7.64117e-55	16936.1	-15.6169
31 - 60	1.344e-19	1.66982e-19	16936.1	8.9884
33 - 60	8.63186e-58	1.29253e-57	16936.1	16.0238
37 - 60	0.00048381	0.00052596	16936.1	-3.30018
38 - 60	1.07345e-183	2.47785e-183	16936.1	-29.1313
39 - 60	3.24597e-193	7.76327e-193	16936.1	-29.8999
4 - 60	8.17082e-222	2.1254e-221	16936.1	-32.1063
40 - 60	1.96932e-142	4.03711e-142	16936.1	-25.5531
41 - 60	0.0363962	0.0378011	16936.1	-1.79421
42 - 60	3.92649e-58	5.88973e-58	16936.1	16.0732
43 - 60	7.9395e-49	1.13742e-48	16936.1	14.6715
44 - 60	4.29949e-26	5.50053e-26	16936.1	10.5125
45 - 60	0	0	16936.1	-54.8279
46 - 60	2.73958e-10	3.20922e-10	16936.1	-6.20727
5 - 60	8.23962e-37	1.12075e-36	16936.1	12.6405
50 - 60	2.75546e-16	3.37475e-16	16936.1	-8.10526
52 - 60	0	0	16936.1	-61.7331
53 - 60	1.09229e-38	1.49279e-38	16936.1	12.9783
54 - 60	0	0	16936.1	-50.7505
1 - 61	1.90374e-11	2.25774e-11	16936.1	-6.61445
10 - 61	9.55969e-43	1.32971e-42	16936.1	-13.6805
11 - 61	0	0	16936.1	-43.0862
12 - 61	1.33123e-60	2.0215e-60	16936.1	-16.4257
13 - 61	1.57859e-302	4.94243e-302	16936.1	-37.6971
14 - 61	0	0	16936.1	-46.5141
17 - 61	0	0	16936.1	-56.1967
19 - 61	1.50728e-23	1.90568e-23	16936.1	9.94248
2 - 61	5.47865e-05	6.03985e-05	16936.1	-3.86899
20 - 61	1.84932e-300	5.74824e-300	16936.1	-37.5631
21 - 61	6.63335e-244	1.80168e-243	16936.1	-33.7197
22 - 61	8.751e-149	1.83324e-148	16936.1	-26.1338
23 - 61	1.25483e-40	1.72314e-40	16936.1	13.3185
26 - 61	2.55149e-65	3.95825e-65	16936.1	-17.0793
27 - 61	0	0	16936.1	-52.1793
28 - 61	0	0	16936.1	-53.9853
29 - 61	2.28595e-31	3.02335e-31	16936.1	11.6074
30 - 61	8.49982e-44	1.18997e-43	16936.1	-13.8567
31 - 61	1.65097e-09	1.92875e-09	16936.1	5.91804
33 - 61	6.46567e-32	8.60424e-32	16936.1	11.7155
37 - 61	8.52358e-06	9.51855e-06	16936.1	-4.30129
38 - 61	8.92621e-142	1.82553e-141	16936.1	-25.4923
39 - 61	8.7442e-141	1.77985e-140	16936.1	-25.4004
4 - 61	2.87897e-160	6.19699e-160	16936.1	-27.154
40 - 61	3.24461e-108	6.00776e-108	16936.1	-22.1795
41 - 61	0.00107827	0.00116486	16936.1	-3.06811
42 - 61	1.06086e-33	1.41613e-33	16936.1	12.0608
43 - 61	8.58932e-26	1.09724e-25	16936.1	10.4468
44 - 61	3.26585e-13	3.91629e-13	16936.1	7.19282
45 - 61	0	0	16936.1	-45.4115
46 - 61	1.52541e-11	1.81406e-11	16936.1	-6.64721
5 - 61	6.49615e-18	8.02466e-18	16936.1	8.55031
50 - 61	1.9812e-16	2.42993e-16	16936.1	-8.14538
52 - 61	0	0	16936.1	-49.4179
53 - 61	1.56188e-20	1.95178e-20	16936.1	9.22283
54 - 61	0	0	16936.1	-42.4531
60 - 61	0.044922	0.0465437	16936.1	-1.69629
1 - 65	4.2742e-210	1.07605e-209	16936.1	31.2196
10 - 65	9.6391e-129	1.90788e-128	16936.1	24.2569
11 - 65	9.75905e-24	1.23749e-23	16936.1	-9.98586
12 - 65	1.1053e-90	1.89575e-90	16936.1	20.2451
13 - 65	2.88939e-05	3.20175e-05	16936.1	-4.02238
14 - 65	1.21529e-61	1.8487e-61	16936.1	-16.5719
17 - 65	6.7207e-173	1.50299e-172	16936.1	-28.2362
19 - 65	0	0	16936.1	54.6412
2 - 65	5.859e-262	1.68153e-261	16936.1	34.9879
20 - 65	0.0034104	0.00362961	16936.1	-2.7057
21 - 65	0.119517	0.121924	16936.1	1.17743
22 - 65	3.97842e-43	5.54275e-43	16936.1	13.7446
23 - 65	0	0	16936.1	52.715
26 - 65	3.3561e-71	5.35112e-71	16936.1	17.8617
27 - 65	1.0509e-120	2.01521e-120	16936.1	-23.4644
28 - 65	4.04222e-137	8.09385e-137	16936.1	-25.0576
29 - 65	0	0	16936.1	51.1195
30 - 65	2.06053e-179	4.70587e-179	16936.1	28.7793
31 - 65	0	0	16936.1	46.0614
33 - 65	0	0	16936.1	53.7591
37 - 65	1.8587e-306	5.86207e-306	16936.1	37.9503
38 - 65	1.94711e-14	2.36122e-14	16936.1	7.56904
39 - 65	1.50116e-27	1.93778e-27	16936.1	10.8258
4 - 65	1.32486e-17	1.63425e-17	16936.1	8.46742
40 - 65	6.07603e-44	8.52029e-44	16936.1	13.881
41 - 65	6.58942e-296	2.01904e-295	16936.1	37.267
42 - 65	0	0	16936.1	51.4017
43 - 65	0	0	16936.1	53.6336
44 - 65	0	0	16936.1	47.5509
45 - 65	2.15524e-59	3.24985e-59	16936.1	-16.254
46 - 65	1.09398e-241	2.95272e-241	16936.1	33.5609
5 - 65	0	0	16936.1	53.7853
50 - 65	7.79475e-232	2.07138e-231	16936.1	32.8471
52 - 65	5.34013e-89	9.10465e-89	16936.1	-20.0499
53 - 65	0	0	16936.1	50.3008
54 - 65	9.89304e-38	1.34991e-37	16936.1	-12.8072
60 - 65	0	0	16936.1	42.9908
61 - 65	1.92978e-261	5.5018e-261	16936.1	34.9521
1 - 66	1.68353e-41	2.32668e-41	16936.1	-13.4687
10 - 66	1.44752e-94	2.52802e-94	16936.1	-20.6885
11 - 66	0	0	16936.1	-50.411
12 - 66	1.53181e-119	2.92437e-119	16936.1	-23.3475
13 - 66	0	0	16936.1	-44.8625
14 - 66	0	0	16936.1	-53.4805
17 - 66	0	0	16936.1	-63.4623
19 - 66	0.00378789	0.00402142	16936.1	2.67064
2 - 66	2.31756e-27	2.98269e-27	16936.1	-10.7857
20 - 66	0	0	16936.1	-44.8898
21 - 66	0	0	16936.1	-40.9043
22 - 66	3.57469e-243	9.67864e-243	16936.1	-33.6674
23 - 66	1.88841e-11	2.24265e-11	16936.1	6.61564
26 - 66	4.03073e-124	7.79879e-124	16936.1	-23.8043
27 - 66	0	0	16936.1	-59.2582
28 - 66	0	0	16936.1	-61.2696
29 - 66	5.66487e-07	6.4602e-07	16936.1	4.86826
30 - 66	1.36297e-100	2.44482e-100	16936.1	-21.3591
31 - 66	0.165624	0.167965	16936.1	-0.971623
33 - 66	1.18183e-06	1.33713e-06	16936.1	4.72069
37 - 66	3.30946e-31	4.37032e-31	16936.1	-11.5755
38 - 66	1.00245e-222	2.61547e-222	16936.1	-32.1743
39 - 66	4.99641e-227	1.31156e-226	16936.1	-32.4937
4 - 66	5.57207e-251	1.54262e-250	16936.1	-34.2218
40 - 66	4.02452e-184	9.31481e-184	16936.1	-29.1661
41 - 66	2.33689e-24	2.97203e-24	16936.1	-10.1272
42 - 66	4.53129e-08	5.22281e-08	16936.1	5.34622
43 - 66	0.000445703	0.00048576	16936.1	3.32315
44 - 66	0.381876	0.383211	16936.1	0.300562
45 - 66	0	0	16936.1	-52.1733
46 - 66	3.25967e-43	4.55613e-43	16936.1	-13.7591
5 - 66	0.113269	0.115687	16936.1	1.20936
50 - 66	2.43131e-53	3.54806e-53	16936.1	-15.367
52 - 66	0	0	16936.1	-56.4434
53 - 66	0.0110815	0.0116497	16936.1	2.28771
54 - 66	0	0	16936.1	-49.1696
60 - 66	2.98439e-20	3.72399e-20	16936.1	-9.15292
61 - 66	7.8283e-11	9.24577e-11	16936.1	-6.40162
65 - 66	0	0	16936.1	-42.189
1 - 67	9.57857e-06	1.06828e-05	16936.1	4.27535
10 - 67	0.061634	0.0636294	16936.1	-1.54125
11 - 67	3.63387e-138	7.31018e-138	16936.1	-25.1559
12 - 67	2.94276e-05	3.25671e-05	16936.1	-4.01807
13 - 67	1.7474e-99	3.11493e-99	16936.1	-21.2373
14 - 67	7.73474e-182	1.78065e-181	16936.1	-28.9791
17 - 67	1.7928e-272	5.19731e-272	16936.1	-35.7077
19 - 67	4.44447e-80	7.35901e-80	16936.1	18.9836
2 - 67	9.10453e-12	1.08423e-11	16936.1	6.72292
20 - 67	9.38234e-95	1.64191e-94	16936.1	-20.7097
21 - 67	9.11071e-72	1.46077e-71	16936.1	-17.9353
22 - 67	3.79118e-28	4.93083e-28	16936.1	-10.9517
23 - 67	1.06504e-101	1.91841e-101	16936.1	21.4801
26 - 67	4.39146e-07	5.02131e-07	16936.1	-4.9184
27 - 67	1.78847e-236	4.78221e-236	16936.1	-33.185
28 - 67	1.2578e-246	3.4271e-246	16936.1	-33.9136
29 - 67	1.31667e-88	2.24043e-88	16936.1	20.0042
30 - 67	0.183726	0.186103	16936.1	-0.901275
31 - 67	5.22118e-52	7.56808e-52	16936.1	15.165
33 - 67	3.59675e-91	6.1936e-91	16936.1	20.3013
37 - 67	5.15395e-12	6.1462e-12	16936.1	6.80547
38 - 67	2.31652e-34	3.11159e-34	16936.1	-12.1863
39 - 67	1.28278e-29	1.67853e-29	16936.1	-11.2558
4 - 67	1.5626e-37	2.1288e-37	16936.1	-12.7714
40 - 67	9.5937e-19	1.19023e-18	16936.1	-8.76903
41 - 67	1.65923e-14	2.01779e-14	16936.1	7.58985
42 - 67	7.00307e-92	1.21077e-91	16936.1	20.3829
43 - 67	1.10093e-82	1.83702e-82	16936.1	19.301
44 - 67	1.49431e-59	2.25719e-59	16936.1	16.2767
45 - 67	2.41015e-178	5.48978e-178	16936.1	-28.6909
46 - 67	2.13939e-06	2.40786e-06	16936.1	4.59841
5 - 67	4.63879e-71	7.38262e-71	16936.1	17.8434
50 - 67	0.000255187	0.000279181	16936.1	3.47572
52 - 67	3.97449e-209	9.94777e-209	16936.1	-31.1453
53 - 67	6.63127e-73	1.0712e-72	16936.1	18.0823
54 - 67	1.96023e-151	4.12656e-151	16936.1	-26.3725
60 - 67	1.44561e-20	1.80911e-20	16936.1	9.23115
61 - 67	1.73136e-21	2.17304e-21	16936.1	9.45657
65 - 67	1.02049e-78	1.6768e-78	16936.1	-18.8158
66 - 67	1.21111e-51	1.75254e-51	16936.1	15.1091
1 - 9	6.2976e-124	1.21575e-123	16936.1	23.7851
10 - 9	9.30242e-68	1.46961e-67	16936.1	17.4078
11 - 9	3.95305e-28	5.13359e-28	16936.1	-10.9479
12 - 9	1.26469e-45	1.78801e-45	16936.1	14.1581
13 - 9	1.82015e-10	2.14092e-10	16936.1	-6.27134
14 - 9	5.50198e-60	8.32549e-60	16936.1	-16.3384
17 - 9	8.97622e-134	1.78488e-133	16936.1	-24.7407
19 - 9	0	0	16936.1	42.8521
2 - 9	1.97597e-157	4.20077e-157	16936.1	26.9053
20 - 9	6.65416e-08	7.6594e-08	16936.1	-5.27612
21 - 9	0.0178812	0.0186841	16936.1	-2.09974
22 - 9	2.28126e-14	2.76254e-14	16936.1	7.54839
23 - 9	0	0	16936.1	43.2259
26 - 9	7.24451e-36	9.79202e-36	16936.1	12.4673
27 - 9	1.47039e-102	2.6541e-102	16936.1	-21.5736
28 - 9	5.57496e-110	1.03449e-109	16936.1	-22.3653
29 - 9	0	0	16936.1	41.6813
30 - 9	8.51735e-88	1.44075e-87	16936.1	19.9093
31 - 9	2.44665e-287	7.264e-287	16936.1	36.7036
33 - 9	0	0	16936.1	43.1491
37 - 9	1.08472e-174	2.44488e-174	16936.1	28.3866
38 - 9	0.000116796	0.000128267	16936.1	3.68016
39 - 9	1.68857e-09	1.97e-09	16936.1	5.91433
4 - 9	3.31383e-05	3.66265e-05	16936.1	3.98997
40 - 9	3.07899e-18	3.80893e-18	16936.1	8.63633
41 - 9	8.80796e-176	1.9957e-175	16936.1	28.4777
42 - 9	0	0	16936.1	42.0125
43 - 9	0	0	16936.1	42.5561
44 - 9	2.06975e-307	6.55168e-307	16936.1	38.0115
45 - 9	2.32386e-59	3.49798e-59	16936.1	-16.2494
46 - 9	8.56532e-138	1.71905e-137	16936.1	25.121
5 - 9	0	0	16936.1	41.8182
50 - 9	4.90352e-128	9.63911e-128	16936.1	24.1883
52 - 9	2.56806e-80	4.26031e-80	16936.1	-19.0129
53 - 9	0	0	16936.1	40.3
54 - 9	2.11393e-41	2.91682e-41	16936.1	-13.4518
60 - 9	6.05382e-221	1.56058e-220	16936.1	32.0413
61 - 9	5.31301e-172	1.1851e-171	16936.1	28.1605
65 - 9	0.00102814	0.0011121	16936.1	-3.08232
66 - 9	3.98844e-257	1.11858e-256	16936.1	34.6525
67 - 9	4.2406e-50	6.09542e-50	16936.1	14.8708

## Sheet: RES_NH_CI
comparisons	P	P.adjusted	chi2	T
Ebf1_NH1 - Pdia5_NH1	5.44207e-151	8.4963e-151	14506.5	26.3325
Ebf1_NH1 - Pdia5_NH2	4.64949e-250	1.09442e-249	14506.5	34.1564
Pdia5_NH1 - Pdia5_NH2	1.65365e-23	2.14414e-23	14506.5	9.9332
Ebf1_NH1 - Otx2_NH1	3.81643e-220	7.68307e-220	14506.5	31.981
Pdia5_NH1 - Otx2_NH1	1.0564e-07	1.19726e-07	14506.5	5.19063
Pdia5_NH2 - Otx2_NH1	2.08564e-10	2.47367e-10	14506.5	-6.25007
Ebf1_NH1 - Otx2_NH2	7.7247e-09	8.95363e-09	14506.5	5.65843
Pdia5_NH1 - Otx2_NH2	1.56168e-206	2.98671e-206	14506.5	-30.9451
Pdia5_NH2 - Otx2_NH2	0	0	14506.5	-43.7057
Otx2_NH1 - Otx2_NH2	0	0	14506.5	-43.1809
Ebf1_NH1 - Fbn2_NH1	8.25348e-262	2.00442e-261	14506.5	34.9772
Pdia5_NH1 - Fbn2_NH1	5.96022e-52	8.14209e-52	14506.5	15.1562
Pdia5_NH2 - Fbn2_NH1	5.91792e-16	7.48299e-16	14506.5	8.01154
Otx2_NH1 - Fbn2_NH1	1.86749e-37	2.52854e-37	14506.5	12.7574
Otx2_NH2 - Fbn2_NH1	0	0	14506.5	39.2179
Ebf1_NH1 - Fbn2_NH2	0.000348197	0.000388862	14506.5	3.39143
Pdia5_NH1 - Fbn2_NH2	1.09678e-151	1.74799e-151	14506.5	-26.395
Pdia5_NH2 - Fbn2_NH2	3.97785e-273	1.03154e-272	14506.5	-35.7515
Otx2_NH1 - Fbn2_NH2	3.55236e-243	7.76445e-243	14506.5	-33.6672
Otx2_NH2 - Fbn2_NH2	0.0170335	0.018353	14506.5	-2.1194
Fbn2_NH1 - Fbn2_NH2	7.36112e-269	1.87708e-268	14506.5	-35.4613
Ebf1_NH1 - mL_NH1	3.33441e-151	5.25943e-151	14506.5	26.3516
Pdia5_NH1 - mL_NH1	1.06114e-08	1.22071e-08	14506.5	5.6036
Pdia5_NH2 - mL_NH1	0.0896461	0.0933051	14506.5	-1.34298
Otx2_NH1 - mL_NH1	0.00558656	0.00610531	14506.5	2.53743
Otx2_NH2 - mL_NH1	7.07563e-165	1.24433e-164	14506.5	27.5533
Fbn2_NH1 - mL_NH1	6.04982e-14	7.4647e-14	14506.5	-7.41999
Fbn2_NH2 - mL_NH1	2.38996e-144	3.58494e-144	14506.5	25.7294
Ebf1_NH1 - mL_NH2	1.65584e-152	2.66677e-152	14506.5	26.4684
Pdia5_NH1 - mL_NH2	1.75071e-11	2.10912e-11	14506.5	6.62685
Pdia5_NH2 - mL_NH2	0.464945	0.464945	14506.5	0.087983
Otx2_NH1 - mL_NH2	7.31253e-05	8.2266e-05	14506.5	3.79796
Otx2_NH2 - mL_NH2	3.10522e-162	5.33819e-162	14506.5	27.3249
Fbn2_NH1 - mL_NH2	1.28718e-09	1.50335e-09	14506.5	-5.95892
Fbn2_NH2 - mL_NH2	7.34531e-145	1.11271e-144	14506.5	25.7764
mL_NH1 - mL_NH2	0.132896	0.137386	14506.5	1.11283
Ebf1_NH1 - Sox6_NH1	0	0	14506.5	55.7534
Pdia5_NH1 - Sox6_NH1	0	0	14506.5	40.0082
Pdia5_NH2 - Sox6_NH1	1.28278e-220	2.61687e-220	14506.5	32.0165
Otx2_NH1 - Sox6_NH1	0	0	14506.5	41.546
Otx2_NH2 - Sox6_NH1	0	0	14506.5	74.8335
Fbn2_NH1 - Sox6_NH1	1.38243e-56	1.90551e-56	14506.5	15.8486
Fbn2_NH2 - Sox6_NH1	0	0	14506.5	60.7946
mL_NH1 - Sox6_NH1	5.52047e-121	8.2003e-121	14506.5	23.4922
mL_NH2 - Sox6_NH1	2.44916e-96	3.56878e-96	14506.5	20.8877
Ebf1_NH1 - Sox6_NH2	0	0	14506.5	53.2094
Pdia5_NH1 - Sox6_NH2	2.92284e-282	7.98562e-282	14506.5	36.3657
Pdia5_NH2 - Sox6_NH2	1.32474e-162	2.30323e-162	14506.5	27.357
Otx2_NH1 - Sox6_NH2	0	0	14506.5	38.4922
Otx2_NH2 - Sox6_NH2	0	0	14506.5	76.4118
Fbn2_NH1 - Sox6_NH2	7.05177e-27	9.38192e-27	14506.5	10.6824
Fbn2_NH2 - Sox6_NH2	0	0	14506.5	58.8845
mL_NH1 - Sox6_NH2	8.69587e-81	1.24343e-80	14506.5	19.0704
mL_NH2 - Sox6_NH2	2.64445e-61	3.67819e-61	14506.5	16.5245
Sox6_NH1 - Sox6_NH2	1.02556e-17	1.31858e-17	14506.5	-8.49729
Ebf1_NH1 - Sox6_NH3	0	0	14506.5	76.2284
Pdia5_NH1 - Sox6_NH3	0	0	14506.5	70.8593
Pdia5_NH2 - Sox6_NH3	0	0	14506.5	63.9116
Otx2_NH1 - Sox6_NH3	0	0	14506.5	83.6506
Otx2_NH2 - Sox6_NH3	0	0	14506.5	119.715
Fbn2_NH1 - Sox6_NH3	7.27926e-247	1.6141e-246	14506.5	33.9301
Fbn2_NH2 - Sox6_NH3	0	0	14506.5	87.5013
mL_NH1 - Sox6_NH3	0	0	14506.5	40.8013
mL_NH2 - Sox6_NH3	3.14104e-288	8.7378e-288	14506.5	36.7621
Sox6_NH1 - Sox6_NH3	2.17939e-117	3.20621e-117	14506.5	23.1297
Sox6_NH2 - Sox6_NH3	0	0	14506.5	38.4782
Ebf1_NH1 - Sox6_NH4	0	0	14506.5	68.988
Pdia5_NH1 - Sox6_NH4	0	0	14506.5	58.2843
Pdia5_NH2 - Sox6_NH4	0	0	14506.5	51.0988
Otx2_NH1 - Sox6_NH4	0	0	14506.5	63.4112
Otx2_NH2 - Sox6_NH4	0	0	14506.5	96.05
Fbn2_NH1 - Sox6_NH4	3.38804e-186	6.24543e-186	14506.5	29.3348
Fbn2_NH2 - Sox6_NH4	0	0	14506.5	76.5905
mL_NH1 - Sox6_NH4	1.08925e-279	2.92377e-279	14506.5	36.1938
mL_NH2 - Sox6_NH4	1.16651e-231	2.51374e-231	14506.5	32.8339
Sox6_NH1 - Sox6_NH4	1.71744e-67	2.41072e-67	14506.5	17.3722
Sox6_NH2 - Sox6_NH4	5.84752e-175	1.06508e-174	14506.5	28.4088
Sox6_NH3 - Sox6_NH4	0.00209818	0.00232624	14506.5	-2.86328
Ebf1_NH1 - Pcsk6_NH1	2.37098e-251	5.66812e-251	14506.5	34.2475
Pdia5_NH1 - Pcsk6_NH1	5.55569e-25	7.32776e-25	14506.5	10.2674
Pdia5_NH2 - Pcsk6_NH1	0.308392	0.312476	14506.5	0.500421
Otx2_NH1 - Pcsk6_NH1	1.16245e-11	1.41154e-11	14506.5	6.68717
Otx2_NH2 - Pcsk6_NH1	0	0	14506.5	43.4823
Fbn2_NH1 - Pcsk6_NH1	1.79502e-14	2.23282e-14	14506.5	-7.57962
Fbn2_NH2 - Pcsk6_NH1	1.07294e-273	2.83033e-273	14506.5	35.7901
mL_NH1 - Pcsk6_NH1	0.0470182	0.0499568	14506.5	1.67455
mL_NH2 - Pcsk6_NH1	0.40712	0.409799	14506.5	0.234962
Sox6_NH1 - Pcsk6_NH1	3.16121e-208	6.12235e-208	14506.5	-31.0757
Sox6_NH2 - Pcsk6_NH1	9.33107e-151	1.44207e-150	14506.5	-26.3115
Sox6_NH3 - Pcsk6_NH1	0	0	14506.5	-61.9516
Sox6_NH4 - Pcsk6_NH1	0	0	14506.5	-49.8264
Ebf1_NH1 - Pcsk6_NH2	0	0	14506.5	54.6822
Pdia5_NH1 - Pcsk6_NH2	0	0	14506.5	38.5088
Pdia5_NH2 - Pcsk6_NH2	6.03631e-188	1.12629e-187	14506.5	29.4765
Otx2_NH1 - Pcsk6_NH2	0	0	14506.5	41.4608
Otx2_NH2 - Pcsk6_NH2	0	0	14506.5	80.0341
Fbn2_NH1 - Pcsk6_NH2	2.60057e-32	3.49023e-32	14506.5	11.7929
Fbn2_NH2 - Pcsk6_NH2	0	0	14506.5	60.8695
mL_NH1 - Pcsk6_NH2	4.19557e-90	6.05588e-90	14506.5	20.1781
mL_NH2 - Pcsk6_NH2	1.11987e-68	1.58648e-68	14506.5	17.5301
Sox6_NH1 - Pcsk6_NH2	1.15511e-13	1.41385e-13	14506.5	-7.33365
Sox6_NH2 - Pcsk6_NH2	0.0564039	0.0595159	14506.5	1.58576
Sox6_NH3 - Pcsk6_NH2	0	0	14506.5	-38.1721
Sox6_NH4 - Pcsk6_NH2	1.72267e-166	3.06475e-166	14506.5	-27.6918
Pcsk6_NH1 - Pcsk6_NH2	2.78994e-174	5.0219e-174	14506.5	28.352
Ebf1_NH1 - Gad2_NH1	0.0155109	0.0168309	14506.5	-2.15692
Pdia5_NH1 - Gad2_NH1	4.44996e-157	7.40047e-157	14506.5	-26.8741
Pdia5_NH2 - Gad2_NH1	2.21476e-248	4.98322e-248	14506.5	-34.0377
Otx2_NH1 - Gad2_NH1	3.42043e-219	6.79643e-219	14506.5	-31.9096
Otx2_NH2 - Gad2_NH1	2.45199e-15	3.07504e-15	14506.5	-7.8344
Fbn2_NH1 - Gad2_NH1	9.416e-265	2.32363e-264	14506.5	-35.18
Fbn2_NH2 - Gad2_NH1	1.6323e-08	1.86375e-08	14506.5	-5.52842
mL_NH1 - Gad2_NH1	1.64067e-159	2.75849e-159	14506.5	-27.0877
mL_NH2 - Gad2_NH1	4.66033e-161	7.92255e-161	14506.5	-27.2227
Sox6_NH1 - Gad2_NH1	0	0	14506.5	-54.0328
Sox6_NH2 - Gad2_NH1	0	0	14506.5	-51.3769
Sox6_NH3 - Gad2_NH1	0	0	14506.5	-72.1416
Sox6_NH4 - Gad2_NH1	0	0	14506.5	-66.1516
Pcsk6_NH1 - Gad2_NH1	7.71484e-250	1.78844e-249	14506.5	-34.1408
Pcsk6_NH2 - Gad2_NH1	0	0	14506.5	-52.6632
Ebf1_NH1 - Gad2_NH2	0.0246638	0.0263886	14506.5	-1.96585
Pdia5_NH1 - Gad2_NH2	2.54091e-265	6.37311e-265	14506.5	-35.2191
Pdia5_NH2 - Gad2_NH2	0	0	14506.5	-45.6396
Otx2_NH1 - Gad2_NH2	0	0	14506.5	-44.4712
Otx2_NH2 - Gad2_NH2	1.45257e-23	1.89952e-23	14506.5	-9.94617
Fbn2_NH1 - Gad2_NH2	0	0	14506.5	-42.7059
Fbn2_NH2 - Gad2_NH2	1.65629e-10	1.97978e-10	14506.5	-6.28603
mL_NH1 - Gad2_NH2	3.6047e-222	7.45295e-222	14506.5	-32.1325
mL_NH2 - Gad2_NH2	4.55055e-218	8.92607e-218	14506.5	-31.825
Sox6_NH1 - Gad2_NH2	0	0	14506.5	-71.8828
Sox6_NH2 - Gad2_NH2	0	0	14506.5	-71.2674
Sox6_NH3 - Gad2_NH2	0	0	14506.5	-103.242
Sox6_NH4 - Gad2_NH2	0	0	14506.5	-89.0504
Pcsk6_NH1 - Gad2_NH2	0	0	14506.5	-45.5397
Pcsk6_NH2 - Gad2_NH2	0	0	14506.5	-73.6979
Gad2_NH1 - Gad2_NH2	0.272973	0.278433	14506.5	0.603854
Ebf1_NH1 - Ebf1_NH2	0.00220488	0.00242696	14506.5	-2.84753
Pdia5_NH1 - Ebf1_NH2	2.48538e-146	3.80263e-146	14506.5	-25.9108
Pdia5_NH2 - Ebf1_NH2	5.21685e-227	1.0934e-226	14506.5	-32.4919
Otx2_NH1 - Ebf1_NH2	3.8906e-199	7.34891e-199	14506.5	-30.3686
Otx2_NH2 - Ebf1_NH2	1.21836e-16	1.55341e-16	14506.5	-8.20416
Fbn2_NH1 - Ebf1_NH2	1.31013e-248	2.9918e-248	14506.5	-34.0539
Fbn2_NH2 - Ebf1_NH2	6.97244e-10	8.20603e-10	14506.5	-6.05848
mL_NH1 - Ebf1_NH2	1.03606e-152	1.68636e-152	14506.5	-26.4866
mL_NH2 - Ebf1_NH2	7.38341e-155	1.21469e-154	14506.5	-26.6778
Sox6_NH1 - Ebf1_NH2	0	0	14506.5	-51.1343
Sox6_NH2 - Ebf1_NH2	0	0	14506.5	-48.378
Sox6_NH3 - Ebf1_NH2	0	0	14506.5	-67.2889
Sox6_NH4 - Ebf1_NH2	0	0	14506.5	-62.3037
Pcsk6_NH1 - Ebf1_NH2	1.29479e-228	2.75143e-228	14506.5	-32.6104
Pcsk6_NH2 - Ebf1_NH2	0	0	14506.5	-49.5091
Gad2_NH1 - Ebf1_NH2	0.221383	0.227326	14506.5	-0.767543
Gad2_NH2 - Ebf1_NH2	0.0723903	0.075861	14506.5	-1.45826

## Sheet: RES_territory_CI
comparisons	P	P.adjusted	chi2	T
Ebf1 - Pdia5	0	0	12178.2	38.1271
Ebf1 - Otx2	5.11292e-156	7.53483e-156	12178.2	26.7804
Pdia5 - Otx2	3.82853e-97	5.10471e-97	12178.2	-20.9777
Ebf1 - Fbn2	4.63509e-112	6.48913e-112	12178.2	22.5823
Pdia5 - Fbn2	2.67331e-53	3.11886e-53	12178.2	-15.3607
Otx2 - Fbn2	0.338294	0.338294	12178.2	-0.41713
Ebf1 - mostlyLesion	6.81249e-242	1.19219e-241	12178.2	33.5751
Pdia5 - mostlyLesion	0.00110733	0.00119251	12178.2	3.06015
Otx2 - mostlyLesion	9.86657e-63	1.25575e-62	12178.2	16.7238
Fbn2 - mostlyLesion	2.58061e-47	2.89029e-47	12178.2	14.4313
Ebf1 - Sox6	0	0	12178.2	82.4506
Pdia5 - Sox6	0	0	12178.2	70.7546
Otx2 - Sox6	0	0	12178.2	110.827
Fbn2 - Sox6	0	0	12178.2	68.7249
mostlyLesion - Sox6	0	0	12178.2	39.6279
Ebf1 - Pcsk6	0	0	12178.2	57.2476
Pdia5 - Pcsk6	3.90647e-174	6.43418e-174	12178.2	28.3396
Otx2 - Pcsk6	0	0	12178.2	55.2405
Fbn2 - Pcsk6	2.37392e-305	4.74784e-305	12178.2	37.8783
mostlyLesion - Pcsk6	2.29706e-53	2.79642e-53	12178.2	15.3706
Sox6 - Pcsk6	0	0	12178.2	-43.7174
Ebf1 - Gad2	0.216822	0.224852	12178.2	-0.782984
Pdia5 - Gad2	0	0	12178.2	-46.7235
Otx2 - Gad2	1.3015e-245	2.42946e-245	12178.2	-33.8409
Fbn2 - Gad2	1.97429e-156	3.07112e-156	12178.2	-26.8169
mostlyLesion - Gad2	0	0	12178.2	-38.3998
Sox6 - Gad2	0	0	12178.2	-103.797
Pcsk6 - Gad2	0	0	12178.2	-70.705
