# Supplementary material for: Transcriptomic atlas of midbrain dopamine neurons uncovers differential vulnerability in a Parkinsonism lesion model
Source: eLife. 2024 Apr 8;12:RP89482. doi: 10.7554/eLife.89482 (PMC11001297; doi:10.7554/eLife.89482)
Supplement: Supplementary file 7. — Statistical comparisons of both vulnerability and resilience module scores across integrated mDA clusters. [file elife-89482-supp7.xlsx]

## Sheet: readme
the Conover-Iman test (1979) for stochastic dominance and reports the results among multiple pairwise comparisons after a Kruskal-Wallis test for stochastic dominance among k groups (Kruskal and Wallis, 1952).
Integ_VUL_CI	the Conover-Iman test for Vulnerable integrated mDA clusters
Integ_RES_CI	the Conover-Iman test for Resilient integrated mDA clusters

## Sheet: mergedTERs_integCLUSTERs
mergedterritories	integratedClusters	Freq	Column1		integratedClusters	assigned territory_ID	note
35	1	0			1	GABA
36	1	0			2	GABA
51	1	0			3	HPT
Col24a1/Vip	1	0			4	Vglut1
Ebf3/Adcy2	1	0			5	Sox6
GABA	1	628			6	STN_Vglut2
HPT	1	0			7	Ebf3/Adcy2
Kcnab1/Plpp4	1	0			8	GABA
Lef1	1	0			9	Ebf3/Adcy2
Mid1/Mkx	1	0			10	Mid1/Mkx
mODC	1	0			11	Kcnab1/Plpp4
mostlyLesion	1	0			12	Trpc6/Cpq
Sox6	1	0			13	GABA
STN_Vglut2	1	0			14	Sox6
Trpc6/Cpq	1	0			15	Kcnab1/Plpp4
VGAT	1	0			16	Kcnab1/Plpp4
Vglut1	1	0			17	VGAT
35	2	0			18	Ebf3/Adcy2
36	2	90			19	Sox6
51	2	5			20	Lef1
Col24a1/Vip	2	0			21	Kcnab1/Plpp4
Ebf3/Adcy2	2	0			22	mODC
GABA	2	85	tree & markers		23	Mid1/Mkx
HPT	2	0			24	VGAT
Kcnab1/Plpp4	2	1			25	Sox6
Lef1	2	0			26	Kcnab1/Plpp4
Mid1/Mkx	2	0			27	VGAT
mODC	2	4			28	Col24a1/Vip
mostlyLesion	2	0			29	Sox6
Sox6	2	0			30	Sox6
STN_Vglut2	2	0			31	Sox6
Trpc6/Cpq	2	0			32	Ebf3/Adcy2
VGAT	2	0			33	Kcnab1/Plpp4
Vglut1	2	0			34	Sox6
35	3	0			35	Sox6
36	3	0			36	HPT
51	3	0			37	HPT
Col24a1/Vip	3	0			38	Col24a1/Vip
Ebf3/Adcy2	3	0			39	Vglut1
GABA	3	0			40	Mid1/Mkx
HPT	3	556			41	Trpc6/Cpq
Kcnab1/Plpp4	3	0			42	Trpc6/Cpq
Lef1	3	0			43	Ebf3/Adcy2
Mid1/Mkx	3	0			44	Mid1/Mkx
mODC	3	0			45	Sox6
mostlyLesion	3	0			46	Trpc6/Cpq
Sox6	3	0			47	Kcnab1/Plpp4
STN_Vglut2	3	0			48	Vglut1
Trpc6/Cpq	3	0			49	Sox6
VGAT	3	0			50	GABA
Vglut1	3	0			51	Vglut1
35	4	0			52	Ebf3/Adcy2
36	4	0			53	Mid1/Mkx
51	4	0			54	GABA
Col24a1/Vip	4	0			55	Sox6
Ebf3/Adcy2	4	0			56	unassigned	merged cluster #35
GABA	4	57			57	Sox6
HPT	4	0			58	Kcnab1/Plpp4
Kcnab1/Plpp4	4	0			59	Trpc6/Cpq
Lef1	4	0			60	STN_Vglut2
Mid1/Mkx	4	0			61	VGAT
mODC	4	2			62	Kcnab1/Plpp4
mostlyLesion	4	0			63	Trpc6/Cpq
Sox6	4	0			64	Trpc6/Cpq
STN_Vglut2	4	1			65	GABA
Trpc6/Cpq	4	0			66	STN_Vglut2
VGAT	4	0			67	GABA
Vglut1	4	158			68	GABA
35	5	0			69	Kcnab1/Plpp4
36	5	0			70	Vglut1
51	5	0			71	Trpc6/Cpq
Col24a1/Vip	5	0
Ebf3/Adcy2	5	0
GABA	5	0
HPT	5	1
Kcnab1/Plpp4	5	0
Lef1	5	0
Mid1/Mkx	5	0
mODC	5	0
mostlyLesion	5	4
Sox6	5	972
STN_Vglut2	5	1
Trpc6/Cpq	5	0
VGAT	5	0
Vglut1	5	0
35	6	0
36	6	0
51	6	5
Col24a1/Vip	6	0
Ebf3/Adcy2	6	0
GABA	6	9
HPT	6	0
Kcnab1/Plpp4	6	0
Lef1	6	0
Mid1/Mkx	6	0
mODC	6	0
mostlyLesion	6	0
Sox6	6	3
STN_Vglut2	6	281
Trpc6/Cpq	6	1
VGAT	6	0
Vglut1	6	0
35	7	0
36	7	0
51	7	3
Col24a1/Vip	7	1
Ebf3/Adcy2	7	319
GABA	7	0
HPT	7	0
Kcnab1/Plpp4	7	2
Lef1	7	0
Mid1/Mkx	7	0
mODC	7	0
mostlyLesion	7	12
Sox6	7	3
STN_Vglut2	7	0
Trpc6/Cpq	7	39
VGAT	7	1
Vglut1	7	0
35	8	0
36	8	0
51	8	0
Col24a1/Vip	8	1
Ebf3/Adcy2	8	1
GABA	8	442
HPT	8	0
Kcnab1/Plpp4	8	0
Lef1	8	0
Mid1/Mkx	8	0
mODC	8	0
mostlyLesion	8	0
Sox6	8	0
STN_Vglut2	8	6
Trpc6/Cpq	8	0
VGAT	8	27
Vglut1	8	0
35	9	0
36	9	0
51	9	1
Col24a1/Vip	9	0
Ebf3/Adcy2	9	125	tree & markers
GABA	9	0
HPT	9	0
Kcnab1/Plpp4	9	0
Lef1	9	0
Mid1/Mkx	9	0
mODC	9	0
mostlyLesion	9	0
Sox6	9	0
STN_Vglut2	9	0
Trpc6/Cpq	9	132
VGAT	9	2
Vglut1	9	0
35	10	0
36	10	0
51	10	0
Col24a1/Vip	10	0
Ebf3/Adcy2	10	0
GABA	10	0
HPT	10	0
Kcnab1/Plpp4	10	0
Lef1	10	0
Mid1/Mkx	10	290
mODC	10	0
mostlyLesion	10	3
Sox6	10	0
STN_Vglut2	10	0
Trpc6/Cpq	10	3
VGAT	10	0
Vglut1	10	0
35	11	0
36	11	0
51	11	5
Col24a1/Vip	11	0
Ebf3/Adcy2	11	0
GABA	11	0
HPT	11	0
Kcnab1/Plpp4	11	440
Lef1	11	0
Mid1/Mkx	11	0
mODC	11	0
mostlyLesion	11	10
Sox6	11	2
STN_Vglut2	11	0
Trpc6/Cpq	11	38
VGAT	11	0
Vglut1	11	0
35	12	0
36	12	0
51	12	4
Col24a1/Vip	12	0
Ebf3/Adcy2	12	8
GABA	12	0
HPT	12	1
Kcnab1/Plpp4	12	0
Lef1	12	0
Mid1/Mkx	12	9
mODC	12	0
mostlyLesion	12	22
Sox6	12	5
STN_Vglut2	12	0
Trpc6/Cpq	12	308
VGAT	12	1
Vglut1	12	0
35	13	0
36	13	0
51	13	0
Col24a1/Vip	13	0
Ebf3/Adcy2	13	0
GABA	13	111
HPT	13	0
Kcnab1/Plpp4	13	1
Lef1	13	0
Mid1/Mkx	13	0
mODC	13	0
mostlyLesion	13	0
Sox6	13	0
STN_Vglut2	13	0
Trpc6/Cpq	13	0
VGAT	13	0
Vglut1	13	0
35	14	0
36	14	0
51	14	9
Col24a1/Vip	14	0
Ebf3/Adcy2	14	555
GABA	14	0
HPT	14	0
Kcnab1/Plpp4	14	0
Lef1	14	0
Mid1/Mkx	14	0
mODC	14	0
mostlyLesion	14	57
Sox6	14	81	tree & markers
STN_Vglut2	14	0
Trpc6/Cpq	14	4
VGAT	14	0
Vglut1	14	0
35	15	0
36	15	0
51	15	4
Col24a1/Vip	15	2
Ebf3/Adcy2	15	0
GABA	15	1
HPT	15	0
Kcnab1/Plpp4	15	577
Lef1	15	0
Mid1/Mkx	15	0
mODC	15	0
mostlyLesion	15	0
Sox6	15	0
STN_Vglut2	15	0
Trpc6/Cpq	15	0
VGAT	15	0
Vglut1	15	0
35	16	0
36	16	0
51	16	3
Col24a1/Vip	16	1
Ebf3/Adcy2	16	1
GABA	16	0
HPT	16	0
Kcnab1/Plpp4	16	392
Lef1	16	0
Mid1/Mkx	16	0
mODC	16	0
mostlyLesion	16	2
Sox6	16	0
STN_Vglut2	16	0
Trpc6/Cpq	16	78
VGAT	16	1
Vglut1	16	0
35	17	0
36	17	0
51	17	7
Col24a1/Vip	17	0
Ebf3/Adcy2	17	2
GABA	17	8
HPT	17	0
Kcnab1/Plpp4	17	2
Lef1	17	0
Mid1/Mkx	17	0
mODC	17	1
mostlyLesion	17	0
Sox6	17	0
STN_Vglut2	17	0
Trpc6/Cpq	17	0
VGAT	17	385
Vglut1	17	0
35	18	0
36	18	0
51	18	2
Col24a1/Vip	18	0
Ebf3/Adcy2	18	512
GABA	18	0
HPT	18	0
Kcnab1/Plpp4	18	0
Lef1	18	0
Mid1/Mkx	18	0
mODC	18	0
mostlyLesion	18	8
Sox6	18	0
STN_Vglut2	18	0
Trpc6/Cpq	18	0
VGAT	18	0
Vglut1	18	0
35	19	0
36	19	0
51	19	0
Col24a1/Vip	19	0
Ebf3/Adcy2	19	0
GABA	19	0
HPT	19	0
Kcnab1/Plpp4	19	0
Lef1	19	0
Mid1/Mkx	19	0
mODC	19	0
mostlyLesion	19	0
Sox6	19	476
STN_Vglut2	19	0
Trpc6/Cpq	19	0
VGAT	19	0
Vglut1	19	0
35	20	0
36	20	0
51	20	0
Col24a1/Vip	20	0
Ebf3/Adcy2	20	0
GABA	20	17
HPT	20	0
Kcnab1/Plpp4	20	0
Lef1	20	291
Mid1/Mkx	20	0
mODC	20	0
mostlyLesion	20	0
Sox6	20	0
STN_Vglut2	20	0
Trpc6/Cpq	20	0
VGAT	20	0
Vglut1	20	0
35	21	0
36	21	0
51	21	1
Col24a1/Vip	21	0
Ebf3/Adcy2	21	0
GABA	21	0
HPT	21	0
Kcnab1/Plpp4	21	411
Lef1	21	0
Mid1/Mkx	21	0
mODC	21	0
mostlyLesion	21	11
Sox6	21	22
STN_Vglut2	21	0
Trpc6/Cpq	21	1
VGAT	21	0
Vglut1	21	0
35	22	0
36	22	1
51	22	0
Col24a1/Vip	22	0
Ebf3/Adcy2	22	0
GABA	22	0
HPT	22	0
Kcnab1/Plpp4	22	0
Lef1	22	0
Mid1/Mkx	22	0
mODC	22	240
mostlyLesion	22	0
Sox6	22	0
STN_Vglut2	22	0
Trpc6/Cpq	22	0
VGAT	22	0
Vglut1	22	0
35	23	0
36	23	0
51	23	5
Col24a1/Vip	23	0
Ebf3/Adcy2	23	0
GABA	23	0
HPT	23	2
Kcnab1/Plpp4	23	4
Lef1	23	0
Mid1/Mkx	23	56	tree & markers
mODC	23	0
mostlyLesion	23	33
Sox6	23	16
STN_Vglut2	23	0
Trpc6/Cpq	23	433
VGAT	23	0
Vglut1	23	0
35	24	0
36	24	0
51	24	15
Col24a1/Vip	24	0
Ebf3/Adcy2	24	1
GABA	24	2
HPT	24	0
Kcnab1/Plpp4	24	4
Lef1	24	0
Mid1/Mkx	24	0
mODC	24	0
mostlyLesion	24	0
Sox6	24	0
STN_Vglut2	24	0
Trpc6/Cpq	24	4
VGAT	24	198
Vglut1	24	0
35	25	0
36	25	0
51	25	4
Col24a1/Vip	25	0
Ebf3/Adcy2	25	2
GABA	25	0
HPT	25	0
Kcnab1/Plpp4	25	0
Lef1	25	0
Mid1/Mkx	25	0
mODC	25	2
mostlyLesion	25	14
Sox6	25	742
STN_Vglut2	25	0
Trpc6/Cpq	25	0
VGAT	25	0
Vglut1	25	0
35	26	0
36	26	0
51	26	2
Col24a1/Vip	26	1
Ebf3/Adcy2	26	0
GABA	26	0
HPT	26	0
Kcnab1/Plpp4	26	358
Lef1	26	0
Mid1/Mkx	26	61
mODC	26	1
mostlyLesion	26	0
Sox6	26	0
STN_Vglut2	26	0
Trpc6/Cpq	26	0
VGAT	26	0
Vglut1	26	0
35	27	0
36	27	0
51	27	7
Col24a1/Vip	27	0
Ebf3/Adcy2	27	1
GABA	27	0
HPT	27	0
Kcnab1/Plpp4	27	0
Lef1	27	0
Mid1/Mkx	27	0
mODC	27	0
mostlyLesion	27	0
Sox6	27	0
STN_Vglut2	27	0
Trpc6/Cpq	27	45
VGAT	27	239
Vglut1	27	0
35	28	0
36	28	0
51	28	6
Col24a1/Vip	28	365
Ebf3/Adcy2	28	6
GABA	28	0
HPT	28	0
Kcnab1/Plpp4	28	77
Lef1	28	0
Mid1/Mkx	28	0
mODC	28	0
mostlyLesion	28	0
Sox6	28	0
STN_Vglut2	28	0
Trpc6/Cpq	28	0
VGAT	28	0
Vglut1	28	0
35	29	0
36	29	0
51	29	4
Col24a1/Vip	29	0
Ebf3/Adcy2	29	0
GABA	29	0
HPT	29	0
Kcnab1/Plpp4	29	0
Lef1	29	0
Mid1/Mkx	29	0
mODC	29	0
mostlyLesion	29	49
Sox6	29	903
STN_Vglut2	29	0
Trpc6/Cpq	29	96
VGAT	29	0
Vglut1	29	0
35	30	0
36	30	0
51	30	1
Col24a1/Vip	30	0
Ebf3/Adcy2	30	1
GABA	30	1
HPT	30	0
Kcnab1/Plpp4	30	0
Lef1	30	0
Mid1/Mkx	30	0
mODC	30	1
mostlyLesion	30	9
Sox6	30	454
STN_Vglut2	30	0
Trpc6/Cpq	30	20
VGAT	30	0
Vglut1	30	0
35	31	0
36	31	0
51	31	0
Col24a1/Vip	31	0
Ebf3/Adcy2	31	0
GABA	31	3
HPT	31	0
Kcnab1/Plpp4	31	0
Lef1	31	0
Mid1/Mkx	31	0
mODC	31	0
mostlyLesion	31	10
Sox6	31	904
STN_Vglut2	31	0
Trpc6/Cpq	31	0
VGAT	31	0
Vglut1	31	0
35	32	0
36	32	0
51	32	1
Col24a1/Vip	32	2
Ebf3/Adcy2	32	638
GABA	32	1
HPT	32	0
Kcnab1/Plpp4	32	0
Lef1	32	0
Mid1/Mkx	32	0
mODC	32	1
mostlyLesion	32	7
Sox6	32	0
STN_Vglut2	32	0
Trpc6/Cpq	32	0
VGAT	32	0
Vglut1	32	0
35	33	0
36	33	0
51	33	3
Col24a1/Vip	33	0
Ebf3/Adcy2	33	0
GABA	33	0
HPT	33	0
Kcnab1/Plpp4	33	311
Lef1	33	0
Mid1/Mkx	33	0
mODC	33	0
mostlyLesion	33	1
Sox6	33	0
STN_Vglut2	33	0
Trpc6/Cpq	33	0
VGAT	33	0
Vglut1	33	0
35	34	0
36	34	0
51	34	0
Col24a1/Vip	34	0
Ebf3/Adcy2	34	0
GABA	34	0
HPT	34	0
Kcnab1/Plpp4	34	1
Lef1	34	0
Mid1/Mkx	34	0
mODC	34	0
mostlyLesion	34	4
Sox6	34	655
STN_Vglut2	34	0
Trpc6/Cpq	34	0
VGAT	34	0
Vglut1	34	0
35	35	0
36	35	0
51	35	2
Col24a1/Vip	35	0
Ebf3/Adcy2	35	0
GABA	35	2
HPT	35	0
Kcnab1/Plpp4	35	0
Lef1	35	0
Mid1/Mkx	35	0
mODC	35	0
mostlyLesion	35	0
Sox6	35	432
STN_Vglut2	35	0
Trpc6/Cpq	35	2
VGAT	35	0
Vglut1	35	0
35	36	0
36	36	0
51	36	21
Col24a1/Vip	36	0
Ebf3/Adcy2	36	1
GABA	36	10
HPT	36	401
Kcnab1/Plpp4	36	0
Lef1	36	0
Mid1/Mkx	36	0
mODC	36	0
mostlyLesion	36	0
Sox6	36	0
STN_Vglut2	36	0
Trpc6/Cpq	36	0
VGAT	36	0
Vglut1	36	0
35	37	0
36	37	0
51	37	0
Col24a1/Vip	37	0
Ebf3/Adcy2	37	0
GABA	37	1
HPT	37	586
Kcnab1/Plpp4	37	0
Lef1	37	0
Mid1/Mkx	37	0
mODC	37	0
mostlyLesion	37	0
Sox6	37	0
STN_Vglut2	37	0
Trpc6/Cpq	37	0
VGAT	37	0
Vglut1	37	0
35	38	0
36	38	0
51	38	11
Col24a1/Vip	38	395
Ebf3/Adcy2	38	20
GABA	38	2
HPT	38	0
Kcnab1/Plpp4	38	1
Lef1	38	0
Mid1/Mkx	38	0
mODC	38	0
mostlyLesion	38	1
Sox6	38	0
STN_Vglut2	38	0
Trpc6/Cpq	38	4
VGAT	38	1
Vglut1	38	0
35	39	0
36	39	0
51	39	0
Col24a1/Vip	39	0
Ebf3/Adcy2	39	0
GABA	39	4
HPT	39	0
Kcnab1/Plpp4	39	0
Lef1	39	0
Mid1/Mkx	39	0
mODC	39	0
mostlyLesion	39	0
Sox6	39	0
STN_Vglut2	39	0
Trpc6/Cpq	39	0
VGAT	39	0
Vglut1	39	203
35	40	0
36	40	0
51	40	0
Col24a1/Vip	40	0
Ebf3/Adcy2	40	0
GABA	40	2
HPT	40	0
Kcnab1/Plpp4	40	2
Lef1	40	0
Mid1/Mkx	40	403
mODC	40	1
mostlyLesion	40	0
Sox6	40	0
STN_Vglut2	40	0
Trpc6/Cpq	40	0
VGAT	40	1
Vglut1	40	0
35	41	0
36	41	0
51	41	7
Col24a1/Vip	41	0
Ebf3/Adcy2	41	0
GABA	41	0
HPT	41	0
Kcnab1/Plpp4	41	0
Lef1	41	0
Mid1/Mkx	41	1
mODC	41	0
mostlyLesion	41	67
Sox6	41	45
STN_Vglut2	41	0
Trpc6/Cpq	41	407
VGAT	41	0
Vglut1	41	0
35	42	0
36	42	1
51	42	519
Col24a1/Vip	42	3
Ebf3/Adcy2	42	6
GABA	42	21
HPT	42	0
Kcnab1/Plpp4	42	13
Lef1	42	0
Mid1/Mkx	42	2
mODC	42	9
mostlyLesion	42	129
Sox6	42	31
STN_Vglut2	42	0
Trpc6/Cpq	42	31	tree & markers
VGAT	42	0
Vglut1	42	0
35	43	0
36	43	0
51	43	3
Col24a1/Vip	43	2
Ebf3/Adcy2	43	235	tree & markers
GABA	43	0
HPT	43	0
Kcnab1/Plpp4	43	196
Lef1	43	0
Mid1/Mkx	43	0
mODC	43	1
mostlyLesion	43	4
Sox6	43	0
STN_Vglut2	43	0
Trpc6/Cpq	43	9
VGAT	43	0
Vglut1	43	0
35	44	0
36	44	0
51	44	9
Col24a1/Vip	44	0
Ebf3/Adcy2	44	6
GABA	44	1
HPT	44	0
Kcnab1/Plpp4	44	62
Lef1	44	0
Mid1/Mkx	44	127
mODC	44	1
mostlyLesion	44	6
Sox6	44	0
STN_Vglut2	44	0
Trpc6/Cpq	44	16
VGAT	44	0
Vglut1	44	0
35	45	0
36	45	0
51	45	3
Col24a1/Vip	45	0
Ebf3/Adcy2	45	1
GABA	45	0
HPT	45	0
Kcnab1/Plpp4	45	0
Lef1	45	0
Mid1/Mkx	45	0
mODC	45	0
mostlyLesion	45	82
Sox6	45	649
STN_Vglut2	45	0
Trpc6/Cpq	45	1
VGAT	45	0
Vglut1	45	0
35	46	0
36	46	0
51	46	8
Col24a1/Vip	46	11
Ebf3/Adcy2	46	3
GABA	46	0
HPT	46	0
Kcnab1/Plpp4	46	2
Lef1	46	0
Mid1/Mkx	46	0
mODC	46	0
mostlyLesion	46	4
Sox6	46	7
STN_Vglut2	46	0
Trpc6/Cpq	46	574
VGAT	46	0
Vglut1	46	0
35	47	0
36	47	0
51	47	4
Col24a1/Vip	47	0
Ebf3/Adcy2	47	0
GABA	47	0
HPT	47	0
Kcnab1/Plpp4	47	390
Lef1	47	0
Mid1/Mkx	47	6
mODC	47	1
mostlyLesion	47	0
Sox6	47	0
STN_Vglut2	47	0
Trpc6/Cpq	47	1
VGAT	47	0
Vglut1	47	0
35	48	0
36	48	0
51	48	0
Col24a1/Vip	48	0
Ebf3/Adcy2	48	0
GABA	48	9
HPT	48	0
Kcnab1/Plpp4	48	0
Lef1	48	0
Mid1/Mkx	48	0
mODC	48	0
mostlyLesion	48	0
Sox6	48	0
STN_Vglut2	48	0
Trpc6/Cpq	48	0
VGAT	48	0
Vglut1	48	343
35	49	0
36	49	0
51	49	6
Col24a1/Vip	49	0
Ebf3/Adcy2	49	1
GABA	49	4
HPT	49	0
Kcnab1/Plpp4	49	0
Lef1	49	0
Mid1/Mkx	49	0
mODC	49	0
mostlyLesion	49	81
Sox6	49	568
STN_Vglut2	49	0
Trpc6/Cpq	49	0
VGAT	49	1
Vglut1	49	0
35	50	1
36	50	0
51	50	0
Col24a1/Vip	50	0
Ebf3/Adcy2	50	0
GABA	50	361
HPT	50	0
Kcnab1/Plpp4	50	1
Lef1	50	0
Mid1/Mkx	50	1
mODC	50	0
mostlyLesion	50	0
Sox6	50	0
STN_Vglut2	50	0
Trpc6/Cpq	50	0
VGAT	50	0
Vglut1	50	0
35	51	0
36	51	0
51	51	0
Col24a1/Vip	51	0
Ebf3/Adcy2	51	0
GABA	51	12
HPT	51	0
Kcnab1/Plpp4	51	0
Lef1	51	2
Mid1/Mkx	51	0
mODC	51	0
mostlyLesion	51	0
Sox6	51	0
STN_Vglut2	51	0
Trpc6/Cpq	51	0
VGAT	51	0
Vglut1	51	292
35	52	0
36	52	1
51	52	1
Col24a1/Vip	52	0
Ebf3/Adcy2	52	363
GABA	52	2
HPT	52	0
Kcnab1/Plpp4	52	0
Lef1	52	0
Mid1/Mkx	52	0
mODC	52	0
mostlyLesion	52	0
Sox6	52	0
STN_Vglut2	52	1
Trpc6/Cpq	52	0
VGAT	52	2
Vglut1	52	0
35	53	0
36	53	0
51	53	0
Col24a1/Vip	53	0
Ebf3/Adcy2	53	0
GABA	53	1
HPT	53	1
Kcnab1/Plpp4	53	8
Lef1	53	0
Mid1/Mkx	53	327
mODC	53	1
mostlyLesion	53	0
Sox6	53	0
STN_Vglut2	53	1
Trpc6/Cpq	53	0
VGAT	53	0
Vglut1	53	0
35	54	0
36	54	0
51	54	0
Col24a1/Vip	54	0
Ebf3/Adcy2	54	0
GABA	54	181
HPT	54	0
Kcnab1/Plpp4	54	0
Lef1	54	0
Mid1/Mkx	54	0
mODC	54	0
mostlyLesion	54	0
Sox6	54	0
STN_Vglut2	54	0
Trpc6/Cpq	54	0
VGAT	54	0
Vglut1	54	0
35	55	0
36	55	0
51	55	1
Col24a1/Vip	55	0
Ebf3/Adcy2	55	27
GABA	55	0
HPT	55	0
Kcnab1/Plpp4	55	0
Lef1	55	0
Mid1/Mkx	55	0
mODC	55	0
mostlyLesion	55	2
Sox6	55	593
STN_Vglut2	55	0
Trpc6/Cpq	55	6
VGAT	55	0
Vglut1	55	0
35	56	194
36	56	0
51	56	0
Col24a1/Vip	56	0
Ebf3/Adcy2	56	0
GABA	56	3
HPT	56	0
Kcnab1/Plpp4	56	0
Lef1	56	0
Mid1/Mkx	56	0
mODC	56	0
mostlyLesion	56	0
Sox6	56	0
STN_Vglut2	56	0
Trpc6/Cpq	56	0
VGAT	56	0
Vglut1	56	0
35	57	0
36	57	0
51	57	1
Col24a1/Vip	57	0
Ebf3/Adcy2	57	0
GABA	57	1
HPT	57	1
Kcnab1/Plpp4	57	1
Lef1	57	0
Mid1/Mkx	57	0
mODC	57	3
mostlyLesion	57	71
Sox6	57	753
STN_Vglut2	57	0
Trpc6/Cpq	57	0
VGAT	57	0
Vglut1	57	0
35	58	0
36	58	0
51	58	8
Col24a1/Vip	58	0
Ebf3/Adcy2	58	0
GABA	58	0
HPT	58	0
Kcnab1/Plpp4	58	448
Lef1	58	0
Mid1/Mkx	58	14
mODC	58	0
mostlyLesion	58	1
Sox6	58	0
STN_Vglut2	58	0
Trpc6/Cpq	58	0
VGAT	58	0
Vglut1	58	0
35	59	0
36	59	0
51	59	4
Col24a1/Vip	59	0
Ebf3/Adcy2	59	4
GABA	59	0
HPT	59	0
Kcnab1/Plpp4	59	2
Lef1	59	0
Mid1/Mkx	59	0
mODC	59	0
mostlyLesion	59	24
Sox6	59	72
STN_Vglut2	59	0
Trpc6/Cpq	59	578
VGAT	59	0
Vglut1	59	0
35	60	1
36	60	0
51	60	0
Col24a1/Vip	60	0
Ebf3/Adcy2	60	0
GABA	60	2
HPT	60	0
Kcnab1/Plpp4	60	0
Lef1	60	0
Mid1/Mkx	60	0
mODC	60	0
mostlyLesion	60	0
Sox6	60	0
STN_Vglut2	60	532
Trpc6/Cpq	60	0
VGAT	60	0
Vglut1	60	0
35	61	0
36	61	0
51	61	0
Col24a1/Vip	61	0
Ebf3/Adcy2	61	0
GABA	61	0
HPT	61	0
Kcnab1/Plpp4	61	0
Lef1	61	0
Mid1/Mkx	61	0
mODC	61	0
mostlyLesion	61	0
Sox6	61	0
STN_Vglut2	61	0
Trpc6/Cpq	61	0
VGAT	61	426
Vglut1	61	0
35	62	0
36	62	0
51	62	0
Col24a1/Vip	62	0
Ebf3/Adcy2	62	0
GABA	62	0
HPT	62	0
Kcnab1/Plpp4	62	424
Lef1	62	0
Mid1/Mkx	62	0
mODC	62	0
mostlyLesion	62	0
Sox6	62	0
STN_Vglut2	62	0
Trpc6/Cpq	62	0
VGAT	62	0
Vglut1	62	0
35	63	0
36	63	0
51	63	4
Col24a1/Vip	63	0
Ebf3/Adcy2	63	0
GABA	63	0
HPT	63	0
Kcnab1/Plpp4	63	3
Lef1	63	0
Mid1/Mkx	63	0
mODC	63	0
mostlyLesion	63	121
Sox6	63	62
STN_Vglut2	63	0
Trpc6/Cpq	63	588
VGAT	63	1
Vglut1	63	0
35	64	0
36	64	0
51	64	67
Col24a1/Vip	64	0
Ebf3/Adcy2	64	2
GABA	64	0
HPT	64	0
Kcnab1/Plpp4	64	46
Lef1	64	0
Mid1/Mkx	64	2
mODC	64	0
mostlyLesion	64	7
Sox6	64	54
STN_Vglut2	64	0
Trpc6/Cpq	64	156
VGAT	64	0
Vglut1	64	0
35	65	0
36	65	0
51	65	36
Col24a1/Vip	65	7
Ebf3/Adcy2	65	3
GABA	65	381
HPT	65	2
Kcnab1/Plpp4	65	2
Lef1	65	0
Mid1/Mkx	65	1
mODC	65	1
mostlyLesion	65	1
Sox6	65	10
STN_Vglut2	65	1
Trpc6/Cpq	65	1
VGAT	65	4
Vglut1	65	0
35	66	0
36	66	1
51	66	0
Col24a1/Vip	66	0
Ebf3/Adcy2	66	0
GABA	66	0
HPT	66	1
Kcnab1/Plpp4	66	0
Lef1	66	0
Mid1/Mkx	66	0
mODC	66	0
mostlyLesion	66	0
Sox6	66	0
STN_Vglut2	66	612
Trpc6/Cpq	66	0
VGAT	66	0
Vglut1	66	0
35	67	0
36	67	0
51	67	0
Col24a1/Vip	67	0
Ebf3/Adcy2	67	0
GABA	67	392
HPT	67	0
Kcnab1/Plpp4	67	0
Lef1	67	0
Mid1/Mkx	67	0
mODC	67	1
mostlyLesion	67	0
Sox6	67	0
STN_Vglut2	67	0
Trpc6/Cpq	67	0
VGAT	67	0
Vglut1	67	0
35	68	0
36	68	0
51	68	0
Col24a1/Vip	68	0
Ebf3/Adcy2	68	0
GABA	68	95
HPT	68	0
Kcnab1/Plpp4	68	0
Lef1	68	0
Mid1/Mkx	68	0
mODC	68	0
mostlyLesion	68	0
Sox6	68	0
STN_Vglut2	68	0
Trpc6/Cpq	68	0
VGAT	68	0
Vglut1	68	0
35	69	0
36	69	0
51	69	7
Col24a1/Vip	69	0
Ebf3/Adcy2	69	0
GABA	69	0
HPT	69	0
Kcnab1/Plpp4	69	381
Lef1	69	0
Mid1/Mkx	69	0
mODC	69	0
mostlyLesion	69	1
Sox6	69	0
STN_Vglut2	69	0
Trpc6/Cpq	69	0
VGAT	69	1
Vglut1	69	0
35	70	0
36	70	0
51	70	0
Col24a1/Vip	70	0
Ebf3/Adcy2	70	0
GABA	70	8
HPT	70	0
Kcnab1/Plpp4	70	0
Lef1	70	0
Mid1/Mkx	70	0
mODC	70	0
mostlyLesion	70	0
Sox6	70	0
STN_Vglut2	70	0
Trpc6/Cpq	70	0
VGAT	70	0
Vglut1	70	357
35	71	0
36	71	0
51	71	0
Col24a1/Vip	71	0
Ebf3/Adcy2	71	1
GABA	71	0
HPT	71	0
Kcnab1/Plpp4	71	0
Lef1	71	0
Mid1/Mkx	71	0
mODC	71	0
mostlyLesion	71	8
Sox6	71	0
STN_Vglut2	71	0
Trpc6/Cpq	71	432
VGAT	71	0
Vglut1	71	0

## Sheet: Integ_VUL_CI
comparisons	P	P.adjusted	chi2	T
10 - 11	0.29797	0.300904	19977.9	0.530255
10 - 12	5.55405e-08	6.17238e-08	19977.9	-5.30915
11 - 12	2.51025e-11	2.84865e-11	19977.9	-6.57324
10 - 14	1.35266e-284	3.27425e-284	19977.9	-36.5065
11 - 14	0	0	19977.9	-43.7856
12 - 14	1.06216e-227	2.21873e-227	19977.9	-32.5325
10 - 15	1.37804e-177	2.59503e-177	19977.9	28.6207
11 - 15	3.64936e-231	7.73775e-231	19977.9	32.787
12 - 15	1.50828e-286	3.66668e-286	19977.9	36.6359
14 - 15	0	0	19977.9	81.7004
10 - 16	3.06935e-98	4.76235e-98	19977.9	21.0967
11 - 16	2.31722e-123	3.8552e-123	19977.9	23.7249
12 - 16	1.20922e-173	2.25828e-173	19977.9	28.2916
14 - 16	0	0	19977.9	69.0203
15 - 16	2.97917e-15	3.46801e-15	19977.9	-7.80968
10 - 17	3.98864e-189	7.7173e-189	19977.9	29.5638
11 - 17	2.80757e-236	5.99799e-236	19977.9	33.1593
12 - 17	9.3301e-291	2.29789e-290	19977.9	36.9135
14 - 17	0	0	19977.9	76.8211
15 - 17	0.000361109	0.000386095	19977.9	3.38143
16 - 17	1.9096e-25	2.3388e-25	19977.9	10.37
10 - 18	1.86454e-34	2.37114e-34	19977.9	-12.2035
11 - 18	1.73447e-49	2.31811e-49	19977.9	-14.7743
12 - 18	3.48957e-12	3.98808e-12	19977.9	-6.86139
14 - 18	4.69542e-175	8.79806e-175	19977.9	28.4098
15 - 18	0	0	19977.9	-48.6441
16 - 18	0	0	19977.9	-38.6734
17 - 18	0	0	19977.9	-47.5496
10 - 19	0	0	19977.9	-44.2889
11 - 19	0	0	19977.9	-51.6751
12 - 19	0	0	19977.9	-40.8996
14 - 19	6.88862e-37	8.82995e-37	19977.9	-12.654
15 - 19	0	0	19977.9	-86.1592
16 - 19	0	0	19977.9	-74.7261
17 - 19	0	0	19977.9	-81.9368
18 - 19	4.14907e-303	1.04468e-302	19977.9	-37.7178
10 - 21	0.294574	0.297742	19977.9	-0.540078
11 - 21	0.111819	0.114665	19977.9	-1.21694
12 - 21	5.61654e-08	6.23568e-08	19977.9	5.30711
14 - 21	0	0	19977.9	41.1232
15 - 21	1.07721e-235	2.29696e-235	19977.9	-33.117
16 - 21	2.11413e-129	3.57532e-129	19977.9	-24.3163
17 - 21	2.27139e-241	4.97501e-241	19977.9	-33.5263
18 - 21	1.27215e-39	1.64562e-39	19977.9	13.1424
19 - 21	0	0	19977.9	49.1318
10 - 23	1.01593e-58	1.40609e-58	19977.9	-16.1563
11 - 23	9.81716e-84	1.46092e-83	19977.9	-19.4251
12 - 23	1.98093e-28	2.45278e-28	19977.9	-11.0102
14 - 23	1.20041e-125	2.00602e-125	19977.9	23.9503
15 - 23	0	0	19977.9	-53.9498
16 - 23	0	0	19977.9	-43.5657
17 - 23	0	0	19977.9	-52.2993
18 - 23	2.92319e-06	3.20443e-06	19977.9	-4.53285
19 - 23	2.08561e-244	4.58591e-244	19977.9	33.7435
21 - 23	1.57914e-69	2.27493e-69	19977.9	-17.6408
10 - 24	1.92642e-99	3.00138e-99	19977.9	21.2296
11 - 24	8.12496e-115	1.3206e-114	19977.9	22.8634
12 - 24	3.55851e-158	6.45337e-158	19977.9	26.9646
14 - 24	0	0	19977.9	57.4805
15 - 24	0.0196464	0.020425	19977.9	-2.06122
16 - 24	3.94504e-05	4.25025e-05	19977.9	3.94837
17 - 24	2.43351e-06	2.67023e-06	19977.9	-4.57144
18 - 24	2.45133e-257	5.54127e-257	19977.9	34.6542
19 - 24	0	0	19977.9	63.6641
21 - 24	1.26942e-120	2.09956e-120	19977.9	23.4521
23 - 24	0	0	19977.9	38.4081
10 - 25	0	0	19977.9	-50.6876
11 - 25	0	0	19977.9	-60.8201
12 - 25	0	0	19977.9	-47.6698
14 - 25	1.10636e-72	1.61029e-72	19977.9	-18.0518
15 - 25	0	0	19977.9	-100.287
16 - 25	0	0	19977.9	-86.2624
17 - 25	0	0	19977.9	-93.2386
18 - 25	0	0	19977.9	-45.4751
19 - 25	0.000507549	0.00054113	19977.9	-3.2867
21 - 25	0	0	19977.9	-57.5555
23 - 25	0	0	19977.9	-41.2016
24 - 25	0	0	19977.9	-70.4162
10 - 26	4.66768e-231	9.87832e-231	19977.9	32.7791
11 - 26	6.04574e-291	1.49225e-290	19977.9	36.9259
12 - 26	0	0	19977.9	40.3963
14 - 26	0	0	19977.9	81.5123
15 - 26	2.29083e-12	2.62075e-12	19977.9	6.92136
16 - 26	1.12018e-43	1.47269e-43	19977.9	13.8359
17 - 26	0.000661683	0.000704795	19977.9	3.21123
18 - 26	0	0	19977.9	51.5423
19 - 26	0	0	19977.9	86.2364
21 - 26	4.56662e-295	1.13461e-294	19977.9	37.196
23 - 26	0	0	19977.9	56.4024
24 - 26	1.39508e-13	1.60413e-13	19977.9	7.30814
25 - 26	0	0	19977.9	98.2465
10 - 27	1.16304e-133	1.98775e-133	19977.9	24.7252
11 - 27	7.88056e-160	1.43145e-159	19977.9	27.1095
12 - 27	2.46551e-209	4.9136e-209	19977.9	31.1517
14 - 27	0	0	19977.9	65.6419
15 - 27	0.484909	0.484909	19977.9	-0.0378371
16 - 27	5.73788e-11	6.49181e-11	19977.9	6.44886
17 - 27	0.00196811	0.00208453	19977.9	-2.8835
18 - 27	0	0	19977.9	40.057
19 - 27	0	0	19977.9	71.5381
21 - 27	7.89225e-166	1.45228e-165	19977.9	27.6287
23 - 27	0	0	19977.9	44.2409
24 - 27	0.0364671	0.0377384	19977.9	1.79332
25 - 27	0	0	19977.9	80.0806
26 - 27	2.58292e-09	2.89328e-09	19977.9	-5.8438
10 - 28	0	0	19977.9	38.4591
11 - 28	0	0	19977.9	43.6138
12 - 28	0	0	19977.9	46.5496
14 - 28	0	0	19977.9	89.7793
15 - 28	2.00724e-40	2.60849e-40	19977.9	13.2823
16 - 28	7.24079e-89	1.09485e-88	19977.9	20.0319
17 - 28	1.73555e-19	2.06291e-19	19977.9	8.95993
18 - 28	0	0	19977.9	58.6069
19 - 28	0	0	19977.9	93.7711
21 - 28	0	0	19977.9	43.7026
23 - 28	0	0	19977.9	63.6573
24 - 28	3.08056e-34	3.90874e-34	19977.9	12.1623
25 - 28	0	0	19977.9	107.047
26 - 28	4.28498e-09	4.7951e-09	19977.9	5.75882
27 - 28	6.20324e-29	7.69774e-29	19977.9	11.1148
10 - 29	2.18112e-178	4.11423e-178	19977.9	-28.687
11 - 29	2.44212e-267	5.6449e-267	19977.9	-35.344
12 - 29	1.81695e-126	3.04536e-126	19977.9	-24.0307
14 - 29	9.66706e-40	1.25338e-39	19977.9	13.1633
15 - 29	0	0	19977.9	-76.1486
16 - 29	0	0	19977.9	-62.5058
17 - 29	0	0	19977.9	-70.9353
18 - 29	1.4754e-77	2.17265e-77	19977.9	-18.6696
19 - 29	1.81522e-138	3.13562e-138	19977.9	25.1791
21 - 29	8.36525e-230	1.76374e-229	19977.9	-32.6873
23 - 29	5.42883e-43	7.11233e-43	19977.9	-13.7211
24 - 29	0	0	19977.9	-51.1991
25 - 29	3.34082e-238	7.19169e-238	19977.9	33.2985
26 - 29	0	0	19977.9	-75.9285
27 - 29	0	0	19977.9	-59.3662
28 - 29	0	0	19977.9	-84.7782
10 - 30	3.37287e-253	7.5488e-253	19977.9	-34.3651
11 - 30	0	0	19977.9	-40.2929
12 - 30	1.65587e-199	3.25971e-199	19977.9	-30.3892
14 - 30	0.467197	0.467611	19977.9	-0.0823194
15 - 30	0	0	19977.9	-74.5499
16 - 30	0	0	19977.9	-63.572
17 - 30	0	0	19977.9	-71.2783
18 - 30	1.48185e-148	2.62818e-148	19977.9	-26.1075
19 - 30	3.57546e-31	4.49123e-31	19977.9	11.5683
21 - 30	6.64129e-308	1.69488e-307	19977.9	-38.0259
23 - 30	2.74949e-106	4.37437e-106	19977.9	-21.9714
24 - 30	0	0	19977.9	-54.6597
25 - 30	8.34805e-59	1.15683e-58	19977.9	16.1686
26 - 30	0	0	19977.9	-75.4799
27 - 30	0	0	19977.9	-61.7732
28 - 30	0	0	19977.9	-82.8633
29 - 30	3.2618e-32	4.10637e-32	19977.9	-11.7732
10 - 31	0	0	19977.9	-38.567
11 - 31	0	0	19977.9	-46.9245
12 - 31	1.13162e-257	2.56319e-257	19977.9	-34.6775
14 - 31	0.157436	0.160423	19977.9	-1.00507
15 - 31	0	0	19977.9	-87.2704
16 - 31	0	0	19977.9	-73.3603
17 - 31	0	0	19977.9	-81.1044
18 - 31	3.90334e-205	7.6975e-205	19977.9	-30.828
19 - 31	1.79568e-35	2.29132e-35	19977.9	12.3937
21 - 31	0	0	19977.9	-43.9588
23 - 31	1.92403e-149	3.42319e-149	19977.9	-26.1876
24 - 31	0	0	19977.9	-59.818
25 - 31	6.30181e-74	9.19592e-74	19977.9	18.2114
26 - 31	0	0	19977.9	-86.1269
27 - 31	0	0	19977.9	-68.7186
28 - 31	0	0	19977.9	-94.9941
29 - 31	7.81842e-53	1.06255e-52	19977.9	-15.2892
30 - 31	0.208681	0.211684	19977.9	-0.811019
10 - 32	7.29682e-22	8.76551e-22	19977.9	9.54658
11 - 32	2.373e-26	2.91268e-26	19977.9	10.5683
12 - 32	3.38418e-61	4.74205e-61	19977.9	16.508
14 - 32	0	0	19977.9	58.818
15 - 32	6.40108e-127	1.07607e-126	19977.9	-24.075
16 - 32	1.44417e-49	1.93241e-49	19977.9	-14.7867
17 - 32	5.11794e-138	8.8138e-138	19977.9	-25.137
18 - 32	6.69609e-153	1.19892e-152	19977.9	26.4979
19 - 32	0	0	19977.9	65.4396
21 - 32	4.65555e-31	5.84144e-31	19977.9	11.5456
23 - 32	7.64629e-216	1.55406e-215	19977.9	31.6474
24 - 32	4.41231e-55	6.04749e-55	19977.9	-15.626
25 - 32	0	0	19977.9	77.579
26 - 32	9.32045e-183	1.78194e-182	19977.9	-29.0468
27 - 32	6.60727e-84	9.84544e-84	19977.9	-19.4457
28 - 32	1.87642e-277	4.46539e-277	19977.9	-36.0294
29 - 32	0	0	19977.9	51.2498
30 - 32	0	0	19977.9	53.4294
31 - 32	0	0	19977.9	63.3389
10 - 33	1.03224e-05	1.1239e-05	19977.9	4.25862
11 - 33	1.10931e-05	1.20665e-05	19977.9	4.24248
12 - 33	3.36583e-23	4.0693e-23	19977.9	9.86152
14 - 33	0	0	19977.9	42.3957
15 - 33	5.02015e-129	8.46446e-129	19977.9	-24.2799
16 - 33	6.16811e-63	8.68618e-63	19977.9	-16.7507
17 - 33	5.86812e-142	1.02624e-141	19977.9	-25.504
18 - 33	8.5322e-67	1.21519e-66	19977.9	17.2772
19 - 33	0	0	19977.9	49.8825
21 - 33	8.35395e-08	9.25664e-08	19977.9	5.23416
23 - 33	1.25869e-100	1.96921e-100	19977.9	21.3598
24 - 33	5.76956e-69	8.26945e-69	19977.9	-17.5666
25 - 33	0	0	19977.9	56.9752
26 - 33	4.40778e-179	8.34225e-179	19977.9	-28.7445
27 - 33	4.05049e-96	6.24174e-96	19977.9	-20.8604
28 - 33	7.74345e-255	1.73996e-254	19977.9	-34.4798
29 - 33	8.83545e-259	2.00935e-258	19977.9	34.7545
30 - 33	0	0	19977.9	39.7962
31 - 33	0	0	19977.9	44.7563
32 - 33	1.13296e-06	1.24681e-06	19977.9	-4.72924
10 - 34	0	0	19977.9	-52.6191
11 - 34	0	0	19977.9	-62.562
12 - 34	0	0	19977.9	-49.7239
14 - 34	4.84212e-100	7.56498e-100	19977.9	-21.2956
15 - 34	0	0	19977.9	-100.737
16 - 34	0	0	19977.9	-87.2672
17 - 34	0	0	19977.9	-94.1304
18 - 34	0	0	19977.9	-47.6832
19 - 34	1.10496e-11	1.26154e-11	19977.9	-6.69451
21 - 34	0	0	19977.9	-59.3899
23 - 34	0	0	19977.9	-43.5545
24 - 34	0	0	19977.9	-71.9152
25 - 34	3.6991e-05	3.98909e-05	19977.9	-3.96377
26 - 34	0	0	19977.9	-98.981
27 - 34	0	0	19977.9	-81.388
28 - 34	0	0	19977.9	-107.49
29 - 34	9.17541e-279	2.19277e-278	19977.9	-36.1174
30 - 34	4.87762e-82	7.22041e-82	19977.9	-19.2205
31 - 34	7.4702e-103	1.17359e-102	19977.9	-21.6023
32 - 34	0	0	19977.9	-78.7251
33 - 34	0	0	19977.9	-58.7841
10 - 35	1.74146e-191	3.39857e-191	19977.9	-29.7533
11 - 35	2.68069e-258	6.08413e-258	19977.9	-34.721
12 - 35	1.21269e-142	2.12409e-142	19977.9	-25.5672
14 - 35	1.00315e-06	1.10503e-06	19977.9	4.75391
15 - 35	0	0	19977.9	-67.7238
16 - 35	0	0	19977.9	-57.4358
17 - 35	0	0	19977.9	-65.2694
18 - 35	5.43011e-96	8.35629e-96	19977.9	-20.8461
19 - 35	1.36058e-55	1.86707e-55	19977.9	15.7015
21 - 35	1.12691e-229	2.37157e-229	19977.9	-32.6778
23 - 35	5.39013e-63	7.6096e-63	19977.9	-16.7588
24 - 35	0	0	19977.9	-50.142
25 - 35	2.35109e-93	3.58868e-93	19977.9	20.5485
26 - 35	0	0	19977.9	-69.278
27 - 35	0	0	19977.9	-56.6259
28 - 35	0	0	19977.9	-76.324
29 - 35	3.31365e-10	3.73406e-10	19977.9	-6.17717
30 - 35	4.02935e-06	4.40417e-06	19977.9	4.46456
31 - 35	2.56966e-09	2.88129e-09	19977.9	5.84466
32 - 35	0	0	19977.9	-47.0428
33 - 35	6.77894e-262	1.5479e-261	19977.9	-34.9701
34 - 35	4.13727e-120	6.81291e-120	19977.9	23.4006
10 - 38	0	0	19977.9	38.9395
11 - 38	0	0	19977.9	44.0513
12 - 38	0	0	19977.9	46.9607
14 - 38	0	0	19977.9	89.6077
15 - 38	3.5916e-45	4.7384e-45	19977.9	14.083
16 - 38	5.89429e-95	9.05825e-95	19977.9	20.7297
17 - 38	1.00717e-22	1.21377e-22	19977.9	9.75045
18 - 38	0	0	19977.9	58.8716
19 - 38	0	0	19977.9	93.6578
21 - 38	0	0	19977.9	44.1403
23 - 38	0	0	19977.9	63.8578
24 - 38	8.81879e-38	1.13557e-37	19977.9	12.8155
25 - 38	0	0	19977.9	106.623
26 - 38	2.23774e-11	2.54453e-11	19977.9	6.59035
27 - 38	1.75744e-32	2.21496e-32	19977.9	11.8255
28 - 38	0.182184	0.185305	19977.9	0.90709
29 - 38	0	0	19977.9	84.5814
30 - 38	0	0	19977.9	82.8648
31 - 38	0	0	19977.9	94.6815
32 - 38	2.31245e-285	5.60956e-285	19977.9	36.5574
33 - 38	2.66341e-262	6.09398e-262	19977.9	34.9981
34 - 38	0	0	19977.9	107.111
35 - 38	0	0	19977.9	76.4176
10 - 40	1.6733e-187	3.232e-187	19977.9	29.4329
11 - 40	1.73246e-234	3.6872e-234	19977.9	33.0294
12 - 40	5.71131e-289	1.40051e-288	19977.9	36.7959
14 - 40	0	0	19977.9	76.825
15 - 40	0.000779603	0.000829615	19977.9	3.16378
16 - 40	1.3608e-24	1.65944e-24	19977.9	10.1799
17 - 40	0.417146	0.419003	19977.9	-0.209203
18 - 40	0	0	19977.9	47.459
19 - 40	0	0	19977.9	81.9367
21 - 40	1.37211e-239	2.98791e-239	19977.9	33.3984
23 - 40	0	0	19977.9	52.2226
24 - 40	5.36055e-06	5.85354e-06	19977.9	4.40299
25 - 40	0	0	19977.9	93.2987
26 - 40	0.000301438	0.000322908	19977.9	-3.43076
27 - 40	0.00349017	0.00367593	19977.9	2.698
28 - 40	1.95687e-20	2.33582e-20	19977.9	-9.19829
29 - 40	0	0	19977.9	70.9355
30 - 40	0	0	19977.9	71.2507
31 - 40	0	0	19977.9	81.1343
32 - 40	2.34811e-136	4.03761e-136	19977.9	24.9807
33 - 40	1.93952e-140	3.3762e-140	19977.9	25.3631
34 - 40	0	0	19977.9	94.1839
35 - 40	0	0	19977.9	65.2226
38 - 40	9.50576e-24	1.1542e-23	19977.9	-9.98816
10 - 41	2.30917e-105	3.6635e-105	19977.9	-21.8727
11 - 41	2.00995e-147	3.54808e-147	19977.9	-26.0049
12 - 41	1.55649e-65	2.21123e-65	19977.9	-17.1069
14 - 41	8.00431e-60	1.11467e-59	19977.9	16.3139
15 - 41	0	0	19977.9	-60.4305
16 - 41	0	0	19977.9	-49.8565
17 - 41	0	0	19977.9	-58.2537
18 - 41	4.45302e-30	5.55028e-30	19977.9	-11.3487
19 - 41	2.09184e-155	3.75732e-155	19977.9	26.7205
21 - 41	8.43546e-127	1.41595e-126	19977.9	-24.0633
23 - 41	1.90257e-12	2.181e-12	19977.9	-6.94767
24 - 41	0	0	19977.9	-43.4899
25 - 41	3.18826e-237	6.83718e-237	19977.9	33.2277
26 - 41	0	0	19977.9	-62.3873
27 - 41	0	0	19977.9	-49.7315
28 - 41	0	0	19977.9	-69.6811
29 - 41	1.09876e-08	1.22591e-08	19977.9	5.5975
30 - 41	4.65278e-51	6.27791e-51	19977.9	15.0183
31 - 41	4.56695e-73	6.65571e-73	19977.9	18.1012
32 - 41	0	0	19977.9	-38.5234
33 - 41	2.83386e-160	5.1558e-160	19977.9	-27.1482
34 - 41	2.98785e-274	7.06561e-274	19977.9	35.8137
35 - 41	4.95542e-24	6.0234e-24	19977.9	10.0528
38 - 41	0	0	19977.9	-69.8172
40 - 41	0	0	19977.9	-58.1929
10 - 42	9.8532e-75	1.44156e-74	19977.9	18.3141
11 - 42	6.95598e-98	1.07779e-97	19977.9	21.0573
12 - 42	2.28332e-148	4.0433e-148	19977.9	26.0905
14 - 42	0	0	19977.9	72.4587
15 - 42	8.36964e-47	1.1107e-46	19977.9	-14.3483
16 - 42	7.21581e-08	8.00338e-08	19977.9	-5.26118
17 - 42	2.38717e-60	3.33258e-60	19977.9	-16.3884
18 - 42	3.4558e-303	8.72068e-303	19977.9	37.7229
19 - 42	0	0	19977.9	77.6309
21 - 42	5.84923e-104	9.21498e-104	19977.9	21.7219
23 - 42	0	0	19977.9	43.2408
24 - 42	8.59245e-17	1.01278e-16	19977.9	-8.24596
25 - 42	0	0	19977.9	92.3576
26 - 42	3.11603e-91	4.73704e-91	19977.9	-20.3058
27 - 42	1.92087e-30	2.40215e-30	19977.9	-11.4224
28 - 42	1.93963e-162	3.53458e-162	19977.9	-27.3364
29 - 42	0	0	19977.9	66.1058
30 - 42	0	0	19977.9	65.315
31 - 42	0	0	19977.9	78.2541
32 - 42	3.77641e-28	4.6657e-28	19977.9	10.9517
33 - 42	3.89925e-42	5.09069e-42	19977.9	13.5763
34 - 42	0	0	19977.9	92.8839
35 - 42	0	0	19977.9	58.2843
38 - 42	5.56096e-170	1.03511e-169	19977.9	-27.9827
40 - 42	4.90364e-59	6.81195e-59	19977.9	-16.2017
41 - 42	0	0	19977.9	50.2091
10 - 43	4.69737e-86	7.07427e-86	19977.9	19.7017
11 - 43	6.4344e-107	1.02514e-106	19977.9	22.0386
12 - 43	2.86055e-155	5.1299e-155	19977.9	26.7085
14 - 43	0	0	19977.9	66.3496
15 - 43	7.68703e-20	9.14659e-20	19977.9	-9.04958
16 - 43	0.0953595	0.0978758	19977.9	-1.30849
17 - 43	9.92428e-31	1.24384e-30	19977.9	-11.4799
18 - 43	6.97554e-288	1.70312e-287	19977.9	36.7242
19 - 43	0	0	19977.9	72.2853
21 - 43	5.74818e-113	9.26278e-113	19977.9	22.6728
23 - 43	0	0	19977.9	41.5072
24 - 43	3.53323e-07	3.90351e-07	19977.9	-4.9608
25 - 43	0	0	19977.9	83.2112
26 - 43	2.43142e-50	3.27284e-50	19977.9	-14.9072
27 - 43	2.87865e-14	3.3338e-14	19977.9	-7.51782
28 - 43	1.30026e-97	2.01193e-97	19977.9	-21.0271
29 - 43	0	0	19977.9	59.6844
30 - 43	0	0	19977.9	61.2824
31 - 43	0	0	19977.9	70.4112
32 - 43	1.55562e-39	2.01001e-39	19977.9	13.1271
33 - 43	2.03305e-53	2.77302e-53	19977.9	15.3775
34 - 43	0	0	19977.9	84.3281
35 - 43	0	0	19977.9	55.3195
38 - 43	7.98379e-104	1.25603e-103	19977.9	-21.7073
40 - 43	8.2001e-30	1.01981e-29	19977.9	-11.2949
41 - 43	0	0	19977.9	47.7235
42 - 43	0.000101195	0.000108713	19977.9	3.71657
10 - 44	1.48239e-08	1.64905e-08	19977.9	5.54527
11 - 44	9.75698e-09	1.08969e-08	19977.9	5.61809
12 - 44	6.52263e-27	8.01473e-27	19977.9	10.6893
14 - 44	0	0	19977.9	39.6004
15 - 44	1.12835e-87	1.70158e-87	19977.9	-19.8925
16 - 44	1.28675e-40	1.67411e-40	19977.9	-13.3158
17 - 44	5.03902e-101	7.89446e-101	19977.9	-21.4033
18 - 44	2.8727e-67	4.09659e-67	19977.9	17.3407
19 - 44	0	0	19977.9	46.771
21 - 44	4.11608e-11	4.66627e-11	19977.9	6.49911
23 - 44	2.86757e-97	4.43098e-97	19977.9	20.9889
24 - 44	1.36261e-49	1.82545e-49	19977.9	-14.7907
25 - 44	0	0	19977.9	52.4604
26 - 44	4.29156e-129	7.24682e-129	19977.9	-24.2865
27 - 44	8.17035e-69	1.16956e-68	19977.9	-17.5466
28 - 44	8.29186e-187	1.59884e-186	19977.9	-29.3766
29 - 44	1.29923e-227	2.70893e-227	19977.9	32.5261
30 - 44	4.45078e-302	1.11815e-301	19977.9	37.6513
31 - 44	0	0	19977.9	41.4417
32 - 44	0.00942221	0.00986838	19977.9	-2.34875
33 - 44	0.0489892	0.0505579	19977.9	1.6548
34 - 44	0	0	19977.9	54.2775
35 - 44	1.4325e-239	3.11341e-239	19977.9	33.397
38 - 44	1.96462e-193	3.84072e-193	19977.9	-29.9088
40 - 44	9.4555e-100	1.47522e-99	19977.9	-21.2636
41 - 44	1.18598e-149	2.1134e-149	19977.9	26.2066
42 - 44	2.07171e-24	2.52092e-24	19977.9	-10.1387
43 - 44	4.74456e-34	6.01333e-34	19977.9	-12.1268
10 - 45	2.52313e-274	5.97917e-274	19977.9	-35.8187
11 - 45	0	0	19977.9	-43.0811
12 - 45	1.1004e-217	2.24052e-217	19977.9	-31.7864
14 - 45	0.117346	0.120223	19977.9	1.18839
15 - 45	0	0	19977.9	-81.3351
16 - 45	0	0	19977.9	-68.5295
17 - 45	0	0	19977.9	-76.3865
18 - 45	4.34498e-165	7.96932e-165	19977.9	-27.5651
19 - 45	1.32843e-43	1.74444e-43	19977.9	13.8235
21 - 45	0	0	19977.9	-40.4083
23 - 45	1.04661e-116	1.71346e-116	19977.9	-23.0566
24 - 45	0	0	19977.9	-56.9444
25 - 45	5.20355e-84	7.76403e-84	19977.9	19.4582
26 - 45	0	0	19977.9	-81.1159
27 - 45	0	0	19977.9	-65.1316
28 - 45	0	0	19977.9	-89.455
29 - 45	1.64126e-33	2.0755e-33	19977.9	-12.0241
30 - 45	0.124101	0.126914	19977.9	1.15475
31 - 45	0.0112537	0.0117756	19977.9	2.28184
32 - 45	0	0	19977.9	-58.2381
33 - 45	0	0	19977.9	-41.735
34 - 45	5.33033e-113	8.60174e-113	19977.9	22.6762
35 - 45	8.71944e-05	9.3761e-05	19977.9	-3.75406
38 - 45	0	0	19977.9	-89.277
40 - 45	0	0	19977.9	-76.3908
41 - 45	2.62456e-53	3.57549e-53	19977.9	-15.3608
42 - 45	0	0	19977.9	-72.0266
43 - 45	0	0	19977.9	-65.8362
44 - 45	0	0	19977.9	-38.9729
10 - 46	1.01225e-54	1.3857e-54	19977.9	15.5724
11 - 46	3.90402e-69	5.60271e-69	19977.9	17.589
12 - 46	1.70101e-114	2.75681e-114	19977.9	22.8305
14 - 46	0	0	19977.9	65.6607
15 - 46	4.47543e-59	6.22476e-59	19977.9	-16.2073
16 - 46	3.88764e-14	4.49309e-14	19977.9	-7.47834
17 - 46	1.14251e-72	1.66076e-72	19977.9	-18.05
18 - 46	2.1008e-239	4.55712e-239	19977.9	33.3851
19 - 46	0	0	19977.9	71.6213
21 - 46	4.78655e-75	7.01199e-75	19977.9	18.3539
23 - 46	0	0	19977.9	38.5446
24 - 46	1.55152e-23	1.8778e-23	19977.9	-9.93928
25 - 46	0	0	19977.9	84.1943
26 - 46	8.43837e-105	1.33312e-104	19977.9	-21.8123
27 - 46	1.16396e-39	1.50741e-39	19977.9	-13.1492
28 - 46	1.22387e-176	2.29705e-176	19977.9	-28.5418
29 - 46	0	0	19977.9	58.7388
30 - 46	0	0	19977.9	59.8142
31 - 46	0	0	19977.9	70.4288
32 - 46	7.32802e-15	8.51288e-15	19977.9	7.69515
33 - 46	4.72841e-28	5.8355e-28	19977.9	10.9312
34 - 46	0	0	19977.9	85.1465
35 - 46	0	0	19977.9	53.3449
38 - 46	3.75461e-184	7.1905e-184	19977.9	-29.1608
40 - 46	2.62168e-71	3.79622e-71	19977.9	-17.8738
41 - 46	0	0	19977.9	45.25
42 - 46	0.00283554	0.00299765	19977.9	-2.76646
43 - 46	1.21181e-09	1.36147e-09	19977.9	-5.96872
44 - 46	1.25642e-15	1.46561e-15	19977.9	7.91804
45 - 46	0	0	19977.9	65.1465
10 - 47	1.46224e-88	2.20804e-88	19977.9	19.9963
11 - 47	9.91015e-109	1.58788e-108	19977.9	22.2304
12 - 47	1.80912e-156	3.27034e-156	19977.9	26.8145
14 - 47	0	0	19977.9	64.9689
15 - 47	1.72937e-15	2.01521e-15	19977.9	-7.87811
16 - 47	0.334913	0.337306	19977.9	-0.426391
17 - 47	2.1746e-25	2.66047e-25	19977.9	-10.3575
18 - 47	6.5741e-284	1.58792e-283	19977.9	36.4609
19 - 47	0	0	19977.9	71.0069
21 - 47	9.21644e-115	1.49585e-114	19977.9	22.8578
23 - 47	0	0	19977.9	41.0787
24 - 47	1.4594e-05	1.58289e-05	19977.9	-4.18049
25 - 47	0	0	19977.9	81.1772
26 - 47	1.0301e-42	1.34798e-42	19977.9	-13.6742
27 - 47	2.03178e-11	2.31499e-11	19977.9	-6.6047
28 - 47	4.09404e-85	6.14924e-85	19977.9	-19.59
29 - 47	0	0	19977.9	58.3087
30 - 47	0	0	19977.9	60.3122
31 - 47	0	0	19977.9	68.7046
32 - 47	3.37991e-42	4.41777e-42	19977.9	13.5869
33 - 47	4.54551e-56	6.24524e-56	19977.9	15.7716
34 - 47	0	0	19977.9	82.3875
35 - 47	0	0	19977.9	54.5856
38 - 47	6.14788e-91	9.33353e-91	19977.9	-20.2718
40 - 47	1.44407e-24	1.75908e-24	19977.9	-10.1741
41 - 47	0	0	19977.9	47.1192
42 - 47	3.24014e-06	3.54842e-06	19977.9	4.51105
43 - 47	0.20274	0.206028	19977.9	0.831888
44 - 47	1.77494e-36	2.27257e-36	19977.9	12.579
45 - 47	0	0	19977.9	64.4453
46 - 47	1.37707e-11	1.57061e-11	19977.9	6.66218
10 - 49	3.74002e-223	7.69843e-223	19977.9	-32.1957
11 - 49	0	0	19977.9	-38.5374
12 - 49	1.10742e-169	2.05795e-169	19977.9	-27.9574
14 - 49	1.684e-07	1.8623e-07	19977.9	5.10298
15 - 49	0	0	19977.9	-75.6065
16 - 49	0	0	19977.9	-63.4909
17 - 49	0	0	19977.9	-71.5085
18 - 49	5.13494e-119	8.43116e-119	19977.9	-23.2906
19 - 49	2.52009e-65	3.57567e-65	19977.9	17.0785
21 - 49	2.83149e-278	6.75247e-278	19977.9	-36.0846
23 - 49	9.34327e-79	1.37767e-78	19977.9	-18.8185
24 - 49	0	0	19977.9	-53.4426
25 - 49	1.45519e-115	2.37204e-115	19977.9	22.9399
26 - 49	0	0	19977.9	-76.0565
27 - 49	0	0	19977.9	-61.0672
28 - 49	0	0	19977.9	-84.0756
29 - 49	1.11329e-13	1.28142e-13	19977.9	-7.33847
30 - 49	1.26949e-06	1.39569e-06	19977.9	4.70607
31 - 49	7.94496e-11	8.97987e-11	19977.9	6.39927
32 - 49	0	0	19977.9	-52.8812
33 - 49	2.6463e-306	6.70792e-306	19977.9	-37.9233
34 - 49	4.52406e-147	7.96122e-147	19977.9	25.9728
35 - 49	0.416679	0.418907	19977.9	-0.210398
38 - 49	0	0	19977.9	-83.9935
40 - 49	0	0	19977.9	-71.4932
41 - 49	4.27803e-30	5.33807e-30	19977.9	-11.3523
42 - 49	0	0	19977.9	-66.0082
43 - 49	0	0	19977.9	-60.9684
44 - 49	2.89028e-272	6.74997e-272	19977.9	-35.6794
45 - 49	3.37279e-05	3.64766e-05	19977.9	3.98576
46 - 49	0	0	19977.9	-59.7323
47 - 49	0	0	19977.9	-59.8144
10 - 5	3.03751e-297	7.59713e-297	19977.9	-37.3379
11 - 5	0	0	19977.9	-45.6108
12 - 5	7.24521e-239	1.56264e-238	19977.9	-33.3463
14 - 5	0.151282	0.154431	19977.9	1.03097
15 - 5	0	0	19977.9	-86.4131
16 - 5	0	0	19977.9	-72.3429
17 - 5	0	0	19977.9	-80.1773
18 - 5	4.76477e-186	9.15614e-186	19977.9	-29.3151
19 - 5	9.5072e-47	1.26018e-46	19977.9	14.3394
21 - 5	0	0	19977.9	-42.6425
23 - 5	2.35139e-132	4.01265e-132	19977.9	-24.6005
24 - 5	0	0	19977.9	-58.8209
25 - 5	1.46367e-93	2.24019e-93	19977.9	20.5719
26 - 5	0	0	19977.9	-85.2478
27 - 5	0	0	19977.9	-67.724
28 - 5	0	0	19977.9	-94.2079
29 - 5	2.32161e-40	3.01355e-40	19977.9	-13.2714
30 - 5	0.15734	0.16047	19977.9	1.00547
31 - 5	0.0138234	0.0144244	19977.9	2.20239
32 - 5	0	0	19977.9	-62.1739
33 - 5	0	0	19977.9	-43.5548
34 - 5	3.93771e-125	6.57062e-125	19977.9	23.8996
35 - 5	1.71479e-05	1.8581e-05	19977.9	-4.14364
38 - 5	0	0	19977.9	-93.8894
40 - 5	0	0	19977.9	-80.2069
41 - 5	1.07585e-60	1.50379e-60	19977.9	-16.4373
42 - 5	0	0	19977.9	-77.2908
43 - 5	0	0	19977.9	-69.3681
44 - 5	0	0	19977.9	-40.3249
45 - 5	0.405347	0.407878	19977.9	-0.239534
46 - 5	0	0	19977.9	-69.3608
47 - 5	0	0	19977.9	-67.6583
49 - 5	3.85655e-06	4.21938e-06	19977.9	-4.47394
10 - 52	2.44976e-18	2.90266e-18	19977.9	8.66229
11 - 52	1.07888e-20	1.28916e-20	19977.9	9.26229
12 - 52	2.96638e-49	3.95985e-49	19977.9	14.7378
14 - 52	0	0	19977.9	49.9119
15 - 52	1.62698e-93	2.48676e-93	19977.9	-20.5666
16 - 52	1.40793e-37	1.80882e-37	19977.9	-12.7789
17 - 52	5.86272e-107	9.35382e-107	19977.9	-22.0428
18 - 52	3.32277e-116	5.43201e-116	19977.9	23.0055
19 - 52	0	0	19977.9	57.0477
21 - 52	1.33301e-24	1.62731e-24	19977.9	10.1819
23 - 52	9.41946e-163	1.71928e-162	19977.9	27.3636
24 - 52	4.59869e-46	6.08841e-46	19977.9	-14.2287
25 - 52	0	0	19977.9	65.4553
26 - 52	6.60153e-141	1.15271e-140	19977.9	-25.4066
27 - 52	6.91431e-68	9.8851e-68	19977.9	-17.4233
28 - 52	2.72971e-212	5.49842e-212	19977.9	-31.3777
29 - 52	0	0	19977.9	42.4033
30 - 52	0	0	19977.9	46.5199
31 - 52	0	0	19977.9	52.8291
32 - 52	0.462759	0.463581	19977.9	0.0934865
33 - 52	8.03183e-06	8.76199e-06	19977.9	4.31442
34 - 52	0	0	19977.9	67.0783
35 - 52	0	0	19977.9	41.2719
38 - 52	1.15699e-219	2.36429e-219	19977.9	-31.935
40 - 52	1.58734e-105	2.52186e-105	19977.9	-21.8901
41 - 52	2.21865e-239	4.80353e-239	19977.9	33.3834
42 - 52	3.68953e-20	4.3947e-20	19977.9	-9.12966
43 - 52	2.97138e-30	3.71176e-30	19977.9	-11.3842
44 - 52	0.0132296	0.0138176	19977.9	2.21954
45 - 52	0	0	19977.9	49.2831
46 - 52	4.32854e-11	4.90221e-11	19977.9	-6.49153
47 - 52	8.99926e-33	1.13548e-32	19977.9	-11.8819
49 - 52	0	0	19977.9	45.084
5 - 52	0	0	19977.9	51.6505
10 - 53	1.33574e-156	2.41849e-156	19977.9	26.8261
11 - 53	4.84125e-191	9.41539e-191	19977.9	29.7177
12 - 53	2.79354e-243	6.13057e-243	19977.9	33.6631
14 - 53	0	0	19977.9	70.5516
15 - 53	0.0890295	0.091462	19977.9	1.34679
16 - 53	3.41292e-16	3.9894e-16	19977.9	8.07896
17 - 53	0.0426209	0.044026	19977.9	-1.72112
18 - 53	0	0	19977.9	43.3232
19 - 53	0	0	19977.9	76.1573
21 - 53	7.89722e-197	1.55193e-196	19977.9	30.1782
23 - 53	0	0	19977.9	47.7605
24 - 53	0.0015938	0.00169285	19977.9	2.94933
25 - 53	0	0	19977.9	85.8774
26 - 53	7.95596e-07	8.77256e-07	19977.9	-4.80059
27 - 53	0.117865	0.120646	19977.9	1.18575
28 - 53	4.085e-25	4.99229e-25	19977.9	-10.2968
29 - 53	0	0	19977.9	64.3917
30 - 53	0	0	19977.9	65.9764
31 - 53	0	0	19977.9	74.1336
32 - 53	2.93188e-105	4.64489e-105	19977.9	21.8616
33 - 53	8.08459e-115	1.31593e-114	19977.9	22.8636
34 - 53	0	0	19977.9	87.0228
35 - 53	0	0	19977.9	60.4478
38 - 53	1.39326e-28	1.72704e-28	19977.9	-11.042
40 - 53	0.0635984	0.0654553	19977.9	-1.5253
41 - 53	0	0	19977.9	53.47
42 - 53	1.19283e-41	1.55551e-41	19977.9	13.4935
43 - 53	2.50298e-20	2.98452e-20	19977.9	9.17171
44 - 53	5.8603e-82	8.66371e-82	19977.9	19.2108
45 - 53	0	0	19977.9	70.0689
46 - 53	2.62701e-52	3.55734e-52	19977.9	15.2093
47 - 53	1.60251e-16	1.88099e-16	19977.9	8.1709
49 - 53	0	0	19977.9	65.6508
5 - 53	0	0	19977.9	73.1593
52 - 53	1.60339e-83	2.38291e-83	19977.9	19.3995
10 - 55	1.60457e-120	2.65001e-120	19977.9	-23.4419
11 - 55	6.05167e-172	1.12831e-171	19977.9	-28.1487
12 - 55	1.8429e-77	2.7103e-77	19977.9	-18.6575
14 - 55	2.02386e-57	2.79084e-57	19977.9	15.9689
15 - 55	0	0	19977.9	-64.2898
16 - 55	0	0	19977.9	-52.9459
17 - 55	0	0	19977.9	-61.4194
18 - 55	2.61074e-38	3.36562e-38	19977.9	-12.9102
19 - 55	6.47916e-156	1.16749e-155	19977.9	26.7655
21 - 55	8.69657e-148	1.53758e-147	19977.9	-26.0379
23 - 55	3.81177e-17	4.50228e-17	19977.9	-8.34285
24 - 55	0	0	19977.9	-45.3986
25 - 55	1.01153e-244	2.23289e-244	19977.9	33.7659
26 - 55	0	0	19977.9	-65.7806
27 - 55	0	0	19977.9	-52.1325
28 - 55	0	0	19977.9	-73.4853
29 - 55	1.54851e-06	1.7008e-06	19977.9	4.66534
30 - 55	2.71101e-48	3.61469e-48	19977.9	14.5862
31 - 55	2.19246e-71	3.17879e-71	19977.9	17.8839
32 - 55	0	0	19977.9	-41.5104
33 - 55	2.31761e-181	4.42346e-181	19977.9	-28.9323
34 - 55	4.48704e-283	1.07919e-282	19977.9	36.4054
35 - 55	2.37949e-21	2.85235e-21	19977.9	9.42285
38 - 55	0	0	19977.9	-73.5465
40 - 55	0	0	19977.9	-61.3721
41 - 55	0.140821	0.143882	19977.9	-1.07666
42 - 55	0	0	19977.9	-53.9896
43 - 55	0	0	19977.9	-50.642
44 - 55	1.3179e-166	2.42906e-166	19977.9	-27.6953
45 - 55	9.34399e-51	1.25926e-50	19977.9	14.9715
46 - 55	0	0	19977.9	-48.4735
47 - 55	0	0	19977.9	-49.8606
49 - 55	3.03341e-27	3.73955e-27	19977.9	10.7604
5 - 55	1.44235e-58	1.99384e-58	19977.9	16.1345
52 - 55	4.6321e-270	1.07955e-269	19977.9	-35.5296
53 - 55	0	0	19977.9	-56.1961
10 - 57	0	0	19977.9	-50.0957
11 - 57	0	0	19977.9	-60.41
12 - 57	0	0	19977.9	-47.0398
14 - 57	9.74286e-64	1.37719e-63	19977.9	-16.8613
15 - 57	0	0	19977.9	-100.616
16 - 57	0	0	19977.9	-86.2504
17 - 57	0	0	19977.9	-93.2593
18 - 57	0	0	19977.9	-44.8171
19 - 57	0.0251069	0.0260779	19977.9	-1.95823
21 - 57	0	0	19977.9	-57.0783
23 - 57	0	0	19977.9	-40.4713
24 - 57	0	0	19977.9	-70.0147
25 - 57	0.0566887	0.0584506	19977.9	1.58325
26 - 57	0	0	19977.9	-98.3604
27 - 57	0	0	19977.9	-79.8219
28 - 57	0	0	19977.9	-107.333
29 - 57	7.83602e-226	1.62482e-225	19977.9	-32.3946
30 - 57	3.46904e-51	4.68632e-51	19977.9	-15.0379
31 - 57	1.60786e-64	2.27848e-64	19977.9	-16.9687
32 - 57	0	0	19977.9	-77.5424
33 - 57	0	0	19977.9	-56.4584
34 - 57	1.34739e-08	1.50183e-08	19977.9	5.56197
35 - 57	1.8059e-84	2.70884e-84	19977.9	-19.5132
38 - 57	0	0	19977.9	-106.876
40 - 57	0	0	19977.9	-93.3246
41 - 57	2.07116e-225	4.28674e-225	19977.9	-32.3633
42 - 57	0	0	19977.9	-92.695
43 - 57	0	0	19977.9	-83.1273
44 - 57	0	0	19977.9	-51.8918
45 - 57	1.60634e-74	2.34708e-74	19977.9	-18.2871
46 - 57	0	0	19977.9	-84.2537
47 - 57	0	0	19977.9	-81.0233
49 - 57	3.11835e-105	4.93337e-105	19977.9	-21.8587
5 - 57	2.724e-83	4.04299e-83	19977.9	-19.3719
52 - 57	0	0	19977.9	-65.0639
53 - 57	0	0	19977.9	-85.7302
55 - 57	1.16313e-232	2.47082e-232	19977.9	-32.8963
10 - 58	1.30737e-272	3.06592e-272	19977.9	35.7027
11 - 58	0	0	19977.9	40.535
12 - 58	0	0	19977.9	43.7158
14 - 58	0	0	19977.9	87.0003
15 - 58	7.06719e-23	8.52598e-23	19977.9	9.78648
16 - 58	5.77526e-63	8.14311e-63	19977.9	16.7546
17 - 58	5.47778e-09	6.12382e-09	19977.9	5.71716
18 - 58	0	0	19977.9	55.6408
19 - 58	0	0	19977.9	91.1878
21 - 58	0	0	19977.9	40.6936
23 - 58	0	0	19977.9	60.7134
24 - 58	1.61709e-21	1.94051e-21	19977.9	9.46346
25 - 58	0	0	19977.9	104.439
26 - 58	0.00712688	0.0074713	19977.9	2.45098
27 - 58	1.56687e-16	1.84107e-16	19977.9	8.17362
28 - 58	0.00031277	0.000334729	19977.9	-3.42073
29 - 58	0	0	19977.9	81.8095
30 - 58	0	0	19977.9	80.1669
31 - 58	0	0	19977.9	92.1932
32 - 58	5.53349e-230	1.16887e-229	19977.9	32.7004
33 - 58	7.84386e-216	1.59134e-215	19977.9	31.6465
34 - 58	0	0	19977.9	104.928
35 - 58	0	0	19977.9	73.6201
38 - 58	8.62979e-06	9.40522e-06	19977.9	-4.29852
40 - 58	1.36498e-09	1.53204e-09	19977.9	5.94923
41 - 58	0	0	19977.9	66.8185
42 - 58	3.19369e-124	5.32125e-124	19977.9	23.81
43 - 58	8.75496e-71	1.26448e-70	19977.9	17.8056
44 - 58	6.25947e-156	1.12971e-155	19977.9	26.7669
45 - 58	0	0	19977.9	86.6577
46 - 58	2.00817e-138	3.46364e-138	19977.9	25.175
47 - 58	9.51297e-61	1.33134e-60	19977.9	16.4449
49 - 58	0	0	19977.9	81.2586
5 - 58	0	0	19977.9	91.3795
52 - 58	6.77328e-175	1.26704e-174	19977.9	28.3965
53 - 58	2.7058e-13	3.10492e-13	19977.9	7.21839
55 - 58	0	0	19977.9	70.5756
57 - 58	0	0	19977.9	104.707
10 - 59	1.24206e-23	1.5065e-23	19977.9	-9.9615
11 - 59	1.56376e-35	1.99765e-35	19977.9	-12.4048
12 - 59	1.17036e-05	1.27183e-05	19977.9	-4.23044
14 - 59	7.69526e-251	1.71208e-250	19977.9	34.1993
15 - 59	0	0	19977.9	-48.5456
16 - 59	2.28234e-304	5.77236e-304	19977.9	-37.7989
17 - 59	0	0	19977.9	-47.1105
18 - 59	0.000400001	0.000427274	19977.9	3.35321
19 - 59	0	0	19977.9	43.3124
21 - 59	4.58992e-27	5.65222e-27	19977.9	-10.722
23 - 59	9.26822e-17	1.09129e-16	19977.9	8.23687
24 - 59	5.89405e-240	1.28597e-239	19977.9	-33.4248
25 - 59	0	0	19977.9	52.7594
26 - 59	0	0	19977.9	-51.3622
27 - 59	0	0	19977.9	-39.0876
28 - 59	0	0	19977.9	-58.9099
29 - 59	2.06732e-129	3.50141e-129	19977.9	24.3172
30 - 59	1.00032e-207	1.99005e-207	19977.9	31.0281
31 - 59	7.26365e-297	1.8127e-296	19977.9	37.3132
32 - 59	3.22831e-135	5.52585e-135	19977.9	-24.8731
33 - 59	1.63043e-52	2.21315e-52	19977.9	-15.2408
34 - 59	0	0	19977.9	54.7595
35 - 59	2.64935e-139	4.59764e-139	19977.9	25.2573
38 - 59	0	0	19977.9	-59.1439
40 - 59	0	0	19977.9	-47.0213
41 - 59	6.3817e-54	8.72552e-54	19977.9	15.4531
42 - 59	5.80519e-292	1.43602e-291	19977.9	-36.9928
43 - 59	1.04855e-272	2.46409e-272	19977.9	-35.7092
44 - 59	6.45075e-54	8.80926e-54	19977.9	-15.4524
45 - 59	3.53106e-239	7.63033e-239	19977.9	33.3688
46 - 59	8.41029e-224	1.73433e-223	19977.9	-32.2439
47 - 59	4.05513e-268	9.4119e-268	19977.9	-35.3973
49 - 59	4.65656e-177	8.75433e-177	19977.9	28.5767
5 - 59	6.83115e-274	1.61204e-273	19977.9	35.7895
52 - 59	3.12409e-99	4.86065e-99	19977.9	-21.2064
53 - 59	0	0	19977.9	-42.5624
55 - 59	1.91078e-67	2.72831e-67	19977.9	17.3644
57 - 59	0	0	19977.9	52.2566
58 - 59	0	0	19977.9	-55.802
10 - 61	1.162e-167	2.14522e-167	19977.9	27.7854
11 - 61	2.80275e-210	5.6055e-210	19977.9	31.2241
12 - 61	2.21916e-264	5.10859e-264	19977.9	35.1412
14 - 61	0	0	19977.9	75.4744
15 - 61	0.171443	0.174537	19977.9	0.948497
16 - 61	2.12761e-16	2.49216e-16	19977.9	8.13655
17 - 61	0.0113134	0.0118271	19977.9	-2.27982
18 - 61	0	0	19977.9	45.8004
19 - 61	0	0	19977.9	80.678
21 - 61	1.20338e-215	2.437e-215	19977.9	31.6325
23 - 61	0	0	19977.9	50.6068
24 - 61	0.00352154	0.0037055	19977.9	2.69502
25 - 61	0	0	19977.9	92.1612
26 - 61	1.38197e-08	1.53886e-08	19977.9	-5.55755
27 - 61	0.202946	0.206052	19977.9	0.831157
28 - 61	1.87283e-30	2.34467e-30	19977.9	-11.4246
29 - 61	0	0	19977.9	69.4773
30 - 61	0	0	19977.9	69.8722
31 - 61	0	0	19977.9	79.8292
32 - 61	4.77305e-116	7.79161e-116	19977.9	22.9894
33 - 61	1.1924e-122	1.98089e-122	19977.9	23.6543
34 - 61	0	0	19977.9	93.0561
35 - 61	0	0	19977.9	63.7965
38 - 61	1.97974e-34	2.51481e-34	19977.9	-12.1986
40 - 61	0.0190581	0.01985	19977.9	-2.07371
41 - 61	0	0	19977.9	56.6545
42 - 61	6.39849e-45	8.43165e-45	19977.9	14.0418
43 - 61	8.23121e-21	9.84603e-21	19977.9	9.29123
44 - 61	9.10009e-86	1.36865e-85	19977.9	19.6676
45 - 61	0	0	19977.9	75.0317
46 - 61	2.18562e-56	3.00656e-56	19977.9	15.8182
47 - 61	1.14338e-16	1.34487e-16	19977.9	8.21164
49 - 61	0	0	19977.9	70.0805
5 - 61	0	0	19977.9	78.8868
52 - 61	2.77353e-89	4.19939e-89	19977.9	20.0804
53 - 61	0.33246	0.335133	19977.9	-0.433137
55 - 61	0	0	19977.9	59.84
57 - 61	0	0	19977.9	92.189
58 - 61	1.74104e-16	2.04147e-16	19977.9	-8.16087
59 - 61	0	0	19977.9	45.2937
10 - 62	2.4616e-11	2.79626e-11	19977.9	6.57616
11 - 62	2.03009e-12	2.32481e-12	19977.9	6.93849
12 - 62	2.02372e-37	2.59699e-37	19977.9	12.7505
14 - 62	0	0	19977.9	49.2505
15 - 62	3.41837e-128	5.75511e-128	19977.9	-24.199
16 - 62	4.177e-57	5.75294e-57	19977.9	-15.9231
17 - 62	1.6991e-140	2.96227e-140	19977.9	-25.3684
18 - 62	3.54806e-99	5.51268e-99	19977.9	21.2003
19 - 62	0	0	19977.9	56.5519
21 - 62	1.04991e-15	1.22598e-15	19977.9	7.9404
23 - 62	2.40007e-144	4.21695e-144	19977.9	25.724
24 - 62	8.56597e-63	1.20479e-62	19977.9	-16.7309
25 - 62	0	0	19977.9	65.5287
26 - 62	6.11328e-181	1.16286e-180	19977.9	-28.8977
27 - 62	6.75059e-91	1.02348e-90	19977.9	-20.2672
28 - 62	9.36803e-265	2.16097e-264	19977.9	-35.167
29 - 62	0	0	19977.9	41.4702
30 - 62	0	0	19977.9	45.6297
31 - 62	0	0	19977.9	52.3818
32 - 62	0.00303396	0.0032044	19977.9	-2.74432
33 - 62	0.019626	0.0204226	19977.9	2.06164
34 - 62	0	0	19977.9	67.1448
35 - 62	0	0	19977.9	40.1709
38 - 62	1.78066e-272	4.16718e-272	19977.9	-35.6936
40 - 62	6.55909e-139	1.13476e-138	19977.9	-25.2205
41 - 62	2.28776e-220	4.68347e-220	19977.9	31.9877
42 - 62	6.22712e-36	7.96394e-36	19977.9	-12.4788
43 - 62	2.77104e-47	3.68166e-47	19977.9	-14.4254
44 - 62	0.454109	0.455726	19977.9	0.115286
45 - 62	0	0	19977.9	48.6046
46 - 62	5.8324e-22	7.01381e-22	19977.9	-9.56986
47 - 62	6.10971e-50	8.20447e-50	19977.9	-14.845
49 - 62	0	0	19977.9	44.1943
5 - 62	0	0	19977.9	51.165
52 - 62	0.00632487	0.0066367	19977.9	-2.49366
53 - 62	7.40277e-111	1.18951e-110	19977.9	-22.4535
55 - 62	3.58603e-251	7.99416e-251	19977.9	34.2227
57 - 62	0	0	19977.9	65.1627
58 - 62	4.29319e-222	8.82098e-222	19977.9	-32.1168
59 - 62	1.8671e-82	2.76753e-82	19977.9	19.271
61 - 62	5.5342e-120	9.09997e-120	19977.9	-23.3879
10 - 63	6.24622e-27	7.68346e-27	19977.9	-10.6933
11 - 63	5.44591e-41	7.09352e-41	19977.9	-13.3803
12 - 63	4.75443e-07	5.24755e-07	19977.9	-4.90277
14 - 63	1.63993e-256	3.69967e-256	19977.9	34.5967
15 - 63	0	0	19977.9	-50.6467
16 - 63	0	0	19977.9	-39.4226
17 - 63	0	0	19977.9	-48.822
18 - 63	0.00263977	0.00279331	19977.9	2.78971
19 - 63	0	0	19977.9	43.8011
21 - 63	2.09612e-31	2.63592e-31	19977.9	-11.6143
23 - 63	3.1036e-15	3.60913e-15	19977.9	7.80451
24 - 63	4.2124e-254	9.44649e-254	19977.9	-34.4284
25 - 63	0	0	19977.9	53.815
26 - 63	0	0	19977.9	-53.2165
27 - 63	0	0	19977.9	-40.3612
28 - 63	0	0	19977.9	-61.0256
29 - 63	3.83621e-131	6.52676e-131	19977.9	24.4842
30 - 63	5.09532e-210	1.01726e-209	19977.9	31.2042
31 - 63	2.2591e-306	5.73934e-306	19977.9	37.9278
32 - 63	3.43876e-151	6.13754e-151	19977.9	-26.3448
33 - 63	2.5862e-58	3.57066e-58	19977.9	-16.098
34 - 63	0	0	19977.9	55.7758
35 - 63	2.48561e-139	4.32014e-139	19977.9	25.2599
38 - 63	0	0	19977.9	-61.2174
40 - 63	0	0	19977.9	-48.7397
41 - 63	2.14647e-52	2.91012e-52	19977.9	15.2227
42 - 63	0	0	19977.9	-38.973
43 - 63	1.26819e-295	3.15788e-295	19977.9	-37.2323
44 - 63	6.30855e-59	8.75282e-59	19977.9	-16.186
45 - 63	1.45079e-244	3.19627e-244	19977.9	33.7547
46 - 63	1.42733e-246	3.16935e-246	19977.9	-33.8975
47 - 63	1.84591e-289	4.53637e-289	19977.9	-36.8282
49 - 63	2.03054e-179	3.8495e-179	19977.9	28.7723
5 - 63	1.28804e-282	3.09129e-282	19977.9	36.3749
52 - 63	4.8751e-109	7.82235e-109	19977.9	-22.2629
53 - 63	0	0	19977.9	-44.0194
55 - 63	3.02852e-66	4.3079e-66	19977.9	17.2031
57 - 63	0	0	19977.9	53.3536
58 - 63	0	0	19977.9	-57.8789
59 - 63	0.239549	0.242778	19977.9	-0.707764
61 - 63	0	0	19977.9	-47.0078
62 - 63	1.24542e-91	1.89586e-91	19977.9	-20.3516
10 - 64	0.0274581	0.0284938	19977.9	-1.91963
11 - 64	0.00332356	0.00350371	19977.9	-2.71425
12 - 64	0.000262331	0.00028155	19977.9	3.46829
14 - 64	2.09242e-273	4.92746e-273	19977.9	35.7566
15 - 64	1.56148e-220	3.20245e-220	19977.9	-32.0002
16 - 64	1.93233e-126	3.23393e-126	19977.9	-24.0281
17 - 64	2.00421e-229	4.20215e-229	19977.9	-32.6594
18 - 64	5.71374e-26	7.00554e-26	19977.9	10.4852
19 - 64	0	0	19977.9	43.7823
21 - 64	0.0596066	0.0614029	19977.9	-1.55814
23 - 64	2.94686e-48	3.92451e-48	19977.9	14.5805
24 - 64	1.52316e-121	2.52295e-121	19977.9	-23.5441
25 - 64	0	0	19977.9	50.567
26 - 64	1.975e-277	4.69011e-277	19977.9	-36.0279
27 - 64	8.4914e-163	1.5524e-162	19977.9	-27.3675
28 - 64	0	0	19977.9	-41.9817
29 - 64	1.22438e-165	2.24934e-165	19977.9	27.6123
30 - 64	6.70238e-241	1.46517e-240	19977.9	33.4926
31 - 64	1.29897e-306	3.30753e-306	19977.9	37.9432
32 - 64	1.53693e-34	1.95672e-34	19977.9	-12.2193
33 - 64	1.16573e-10	1.31626e-10	19977.9	-6.34037
34 - 64	0	0	19977.9	52.5339
35 - 64	1.20482e-178	2.27644e-178	19977.9	28.7084
38 - 64	0	0	19977.9	-42.435
40 - 64	1.04746e-227	2.19208e-227	19977.9	-32.533
41 - 64	3.80022e-93	5.79277e-93	19977.9	20.5247
42 - 64	1.82596e-101	2.86465e-101	19977.9	-21.4514
43 - 64	1.18765e-111	1.91108e-111	19977.9	-22.5364
44 - 64	4.09085e-14	4.72311e-14	19977.9	-7.47162
45 - 64	5.73752e-263	1.31543e-262	19977.9	35.044
46 - 64	7.49193e-76	1.09895e-75	19977.9	-18.4557
47 - 64	9.14618e-114	1.47807e-113	19977.9	-22.7553
49 - 64	1.01087e-210	2.02534e-210	19977.9	31.258
5 - 64	5.35598e-287	1.30487e-286	19977.9	36.6657
52 - 64	2.76371e-28	3.41827e-28	19977.9	-10.98
53 - 64	2.04866e-190	3.97744e-190	19977.9	-29.6675
55 - 64	6.87448e-108	1.09836e-107	19977.9	22.1416
57 - 64	0	0	19977.9	49.9739
58 - 64	0	0	19977.9	-39.1615
59 - 64	3.20491e-16	3.75014e-16	19977.9	8.08665
61 - 64	1.31709e-205	2.60189e-205	19977.9	-30.8645
62 - 64	2.90602e-19	3.45051e-19	19977.9	-8.90273
63 - 64	6.06401e-19	7.19264e-19	19977.9	8.82048
10 - 69	1.89863e-261	4.32657e-261	19977.9	34.9392
11 - 69	0	0	19977.9	39.2042
12 - 69	0	0	19977.9	42.496
14 - 69	0	0	19977.9	82.7568
15 - 69	1.26368e-23	1.53107e-23	19977.9	9.95978
16 - 69	6.95471e-62	9.76951e-62	19977.9	16.6043
17 - 69	5.43375e-10	6.11704e-10	19977.9	6.09845
18 - 69	0	0	19977.9	53.5071
19 - 69	0	0	19977.9	87.4331
21 - 69	0	0	19977.9	39.4343
23 - 69	0	0	19977.9	58.2632
24 - 69	1.6305e-22	1.96286e-22	19977.9	9.70124
25 - 69	0	0	19977.9	99.0406
26 - 69	0.00142865	0.00151886	19977.9	2.98298
27 - 69	1.51732e-17	1.79595e-17	19977.9	8.45136
28 - 69	0.004615	0.00485156	19977.9	-2.60362
29 - 69	0	0	19977.9	77.2684
30 - 69	0	0	19977.9	76.9086
31 - 69	0	0	19977.9	87.2006
32 - 69	3.31469e-215	6.70067e-215	19977.9	31.5992
33 - 69	2.09375e-207	4.158e-207	19977.9	31.0034
34 - 69	0	0	19977.9	99.8023
35 - 69	0	0	19977.9	70.8412
38 - 69	0.000280276	0.000300524	19977.9	-3.45046
40 - 69	1.32698e-10	1.49683e-10	19977.9	6.32035
41 - 69	0	0	19977.9	64.1077
42 - 69	1.58745e-117	2.60269e-117	19977.9	23.1399
43 - 69	2.30204e-69	3.31212e-69	19977.9	17.6193
44 - 69	2.5314e-152	4.52522e-152	19977.9	26.4463
45 - 69	0	0	19977.9	82.3641
46 - 69	1.78248e-131	3.03721e-131	19977.9	24.5162
47 - 69	4.67665e-60	6.52071e-60	19977.9	16.347
49 - 69	0	0	19977.9	77.4468
5 - 69	0	0	19977.9	86.3331
52 - 69	6.86915e-168	1.27023e-167	19977.9	27.8049
53 - 69	2.56776e-14	2.97681e-14	19977.9	7.53279
55 - 69	0	0	19977.9	67.4263
57 - 69	0	0	19977.9	99.1252
58 - 69	0.254444	0.257642	19977.9	0.66058
59 - 69	0	0	19977.9	53.3703
61 - 69	1.80162e-17	2.13022e-17	19977.9	8.43123
62 - 69	3.95171e-211	7.93154e-211	19977.9	31.2891
63 - 69	0	0	19977.9	55.1906
64 - 69	0	0	19977.9	38.1825
10 - 7	0.039426	0.0407631	19977.9	1.75746
11 - 7	0.0768862	0.0790589	19977.9	1.42638
12 - 7	2.99539e-14	3.46544e-14	19977.9	7.51261
14 - 7	0	0	19977.9	41.8729
15 - 7	3.64519e-181	6.94556e-181	19977.9	-28.9162
16 - 7	7.05842e-95	1.08325e-94	19977.9	-20.7209
17 - 7	2.11874e-191	4.12771e-191	19977.9	-29.7465
18 - 7	3.63221e-52	4.91263e-52	19977.9	15.1879
19 - 7	0	0	19977.9	49.636
21 - 7	0.00568058	0.0059662	19977.9	2.53158
23 - 7	2.31444e-84	3.45786e-84	19977.9	19.5003
24 - 7	1.0504e-94	1.60986e-94	19977.9	-20.7014
25 - 7	0	0	19977.9	57.4529
26 - 7	4.58685e-237	9.81778e-237	19977.9	-33.2163
27 - 7	7.78829e-131	1.32307e-130	19977.9	-24.4546
28 - 7	0	0	19977.9	-39.3635
29 - 7	2.25674e-245	4.99138e-245	19977.9	33.8123
30 - 7	0	0	19977.9	38.9933
31 - 7	0	0	19977.9	44.4925
32 - 7	7.87606e-17	9.2931e-17	19977.9	-8.25639
33 - 7	0.00311006	0.00328171	19977.9	-2.73618
34 - 7	0	0	19977.9	59.277
35 - 7	2.74021e-246	6.0726e-246	19977.9	33.8774
38 - 7	0	0	19977.9	-39.8443
40 - 7	1.02482e-189	1.98625e-189	19977.9	-29.6113
41 - 7	2.42621e-143	4.25624e-143	19977.9	25.6316
42 - 7	8.99404e-71	1.29735e-70	19977.9	-17.8041
43 - 7	6.24247e-82	9.21663e-82	19977.9	-19.2075
44 - 7	1.30149e-05	1.41297e-05	19977.9	-4.20647
45 - 7	0	0	19977.9	41.1837
46 - 7	1.29396e-49	1.73554e-49	19977.9	-14.7942
47 - 7	2.28194e-84	3.41383e-84	19977.9	-19.501
49 - 7	1.73047e-293	4.29005e-293	19977.9	37.0927
5 - 7	0	0	19977.9	43.23
52 - 7	7.95998e-14	9.17145e-14	19977.9	-7.38335
53 - 7	1.23528e-155	2.22233e-155	19977.9	-26.7408
55 - 7	1.17291e-164	2.14779e-164	19977.9	27.528
57 - 7	0	0	19977.9	56.9566
58 - 7	2.01927e-283	4.86697e-283	19977.9	-36.4284
59 - 7	1.34414e-38	1.73477e-38	19977.9	12.9616
61 - 7	1.33281e-168	2.46865e-168	19977.9	-27.8656
62 - 7	1.51975e-07	1.68232e-07	19977.9	-5.12238
63 - 7	9.73154e-44	1.28088e-43	19977.9	13.8461
64 - 7	5.69341e-05	6.12802e-05	19977.9	3.85958
69 - 7	2.86511e-269	6.66359e-269	19977.9	-35.4758
10 - 71	6.68867e-21	8.00936e-21	19977.9	-9.31336
11 - 71	9.48582e-30	1.17841e-29	19977.9	-11.2821
12 - 71	3.54259e-05	3.82763e-05	19977.9	-3.97408
14 - 71	4.49657e-196	8.8211e-196	19977.9	30.1185
15 - 71	0	0	19977.9	-43.462
16 - 71	2.76111e-251	6.1674e-251	19977.9	-34.2307
17 - 71	0	0	19977.9	-43.016
18 - 71	0.00181638	0.00192745	19977.9	2.90868
19 - 71	0	0	19977.9	39.0132
21 - 71	5.18705e-23	6.26444e-23	19977.9	-9.81784
23 - 71	1.77754e-13	2.04182e-13	19977.9	7.27544
24 - 71	3.7374e-213	7.54166e-213	19977.9	-31.4434
25 - 71	0	0	19977.9	46.326
26 - 71	0	0	19977.9	-46.7815
27 - 71	1.40457e-281	3.36382e-281	19977.9	-36.3057
28 - 71	0	0	19977.9	-53.4393
29 - 71	8.5978e-97	1.32672e-96	19977.9	20.9357
30 - 71	8.11303e-169	1.50518e-168	19977.9	27.8839
31 - 71	4.19275e-226	8.70979e-226	19977.9	32.4146
32 - 71	2.19852e-108	3.51763e-108	19977.9	-22.1939
33 - 71	1.22895e-45	1.62515e-45	19977.9	-14.1592
34 - 71	0	0	19977.9	48.4702
35 - 71	2.52695e-114	4.08952e-114	19977.9	22.8128
38 - 71	0	0	19977.9	-53.774
40 - 71	0	0	19977.9	-42.9124
41 - 71	2.63434e-43	3.45528e-43	19977.9	13.7738
42 - 71	1.36027e-229	2.85733e-229	19977.9	-32.6718
43 - 71	1.47644e-226	3.07274e-226	19977.9	-32.4482
44 - 71	3.45511e-48	4.59595e-48	19977.9	-14.5695
45 - 71	4.42025e-186	8.50861e-186	19977.9	29.3177
46 - 71	3.19626e-180	6.06967e-180	19977.9	-28.8386
47 - 71	2.46055e-225	5.08333e-225	19977.9	-32.3578
49 - 71	4.06166e-139	7.03772e-139	19977.9	25.24
5 - 71	3.84919e-207	7.63072e-207	19977.9	30.983
52 - 71	2.00571e-84	3.00457e-84	19977.9	-19.5077
53 - 71	0	0	19977.9	-39.2324
55 - 71	3.81225e-53	5.18723e-53	19977.9	15.3364
57 - 71	0	0	19977.9	45.678
58 - 71	0	0	19977.9	-50.5256
59 - 71	0.455977	0.457193	19977.9	-0.110575
61 - 71	0	0	19977.9	-41.2505
62 - 71	2.60599e-69	3.74465e-69	19977.9	-17.6122
63 - 71	0.305373	0.308105	19977.9	0.509015
64 - 71	2.52513e-14	2.9304e-14	19977.9	-7.53498
69 - 71	0	0	19977.9	-48.8155
7 - 71	4.26047e-33	5.38164e-33	19977.9	-11.9446
10 - 9	0.0146099	0.015231	19977.9	2.18064
11 - 9	0.0279914	0.0290205	19977.9	1.91126
12 - 9	7.38183e-14	8.51401e-14	19977.9	7.3934
14 - 9	3.22151e-298	8.07525e-298	19977.9	37.4012
15 - 9	1.52709e-135	2.61787e-135	19977.9	-24.9039
16 - 9	4.48277e-71	6.48277e-71	19977.9	-17.8435
17 - 9	1.20791e-148	2.14571e-148	19977.9	-26.1155
18 - 9	1.62467e-45	2.14594e-45	19977.9	14.1394
19 - 9	0	0	19977.9	44.9149
21 - 9	0.00190148	0.00201586	19977.9	2.89433
23 - 9	8.51375e-72	1.23597e-71	19977.9	17.9372
24 - 9	6.36292e-77	9.34553e-77	19977.9	-18.5903
25 - 9	0	0	19977.9	50.9147
26 - 9	3.02109e-184	5.79556e-184	19977.9	-29.1685
27 - 9	3.72726e-104	5.88021e-104	19977.9	-21.743
28 - 9	5.70924e-256	1.28543e-255	19977.9	-34.5589
29 - 9	1.11072e-193	2.17516e-193	19977.9	29.9286
30 - 9	5.60715e-268	1.29874e-267	19977.9	35.3877
31 - 9	0	0	19977.9	39.3323
32 - 9	2.14524e-11	2.4418e-11	19977.9	-6.59663
33 - 9	0.0285751	0.0295985	19977.9	-1.90225
34 - 9	0	0	19977.9	52.8025
35 - 9	7.01774e-207	1.38877e-206	19977.9	30.9629
38 - 9	2.97476e-263	6.83406e-263	19977.9	-35.0637
40 - 9	3.70637e-147	6.53249e-147	19977.9	-25.9807
41 - 9	3.43613e-120	5.6666e-120	19977.9	23.4087
42 - 9	3.5781e-50	4.81061e-50	19977.9	-14.8812
43 - 9	1.76297e-61	2.47343e-61	19977.9	-16.5478
44 - 9	0.000415618	0.000443535	19977.9	-3.34259
45 - 9	3.97102e-288	9.7165e-288	19977.9	36.7403
46 - 9	1.83116e-35	2.33396e-35	19977.9	-12.3921
47 - 9	3.97736e-64	5.62919e-64	19977.9	-16.9148
49 - 9	4.31845e-238	9.27849e-238	19977.9	33.2904
5 - 9	0	0	19977.9	38.1552
52 - 9	7.04128e-10	7.91881e-10	19977.9	-6.05682
53 - 9	1.73698e-122	2.88134e-122	19977.9	-23.6381
55 - 9	9.24125e-136	1.58663e-135	19977.9	24.9245
57 - 9	0	0	19977.9	50.3272
58 - 9	7.00811e-219	1.4295e-218	19977.9	-31.8763
59 - 9	1.11091e-33	1.4064e-33	19977.9	12.0565
61 - 9	7.38375e-130	1.25246e-129	19977.9	-24.3604
62 - 9	3.59815e-05	3.88394e-05	19977.9	-3.97037
63 - 9	1.35424e-37	1.74183e-37	19977.9	12.782
64 - 9	2.12763e-05	2.30323e-05	19977.9	4.09389
69 - 9	1.33002e-211	2.67426e-211	19977.9	-31.3253
7 - 9	0.270903	0.274061	19977.9	0.610093
71 - 9	6.14052e-30	7.64515e-30	19977.9	11.3205

## Sheet: Integ_RES_CI
comparisons	P	P.adjusted	chi2	T
10 - 11	0.0342934	0.0356197	16977.8	1.82121
10 - 12	1.12606e-31	1.53777e-31	16977.8	-11.6676
11 - 12	7.45718e-52	1.14134e-51	16977.8	-15.1402
10 - 14	8.02507e-09	9.24645e-09	16977.8	5.65181
11 - 14	5.60691e-06	6.26818e-06	16977.8	4.39323
12 - 14	5.83154e-90	1.07308e-89	16977.8	20.159
10 - 15	1.89769e-136	4.16459e-136	16977.8	-24.9894
11 - 15	3.03718e-212	8.78446e-212	16977.8	-31.3742
12 - 15	2.72219e-38	3.87706e-38	16977.8	-12.907
14 - 15	0	0	16977.8	-38.8722
10 - 16	2.18038e-83	3.87929e-83	16977.8	-19.3835
11 - 16	1.02529e-130	2.21133e-130	16977.8	-24.4431
12 - 16	7.16528e-14	8.67214e-14	16977.8	-7.39736
14 - 16	6.48134e-205	1.82318e-204	16977.8	-30.8109
15 - 16	7.49511e-09	8.64467e-09	16977.8	5.66355
10 - 17	1.32342e-282	4.87848e-282	16977.8	-36.3741
11 - 17	0	0	16977.8	-43.5104
12 - 17	3.63615e-144	8.35351e-144	16977.8	-25.7074
14 - 17	0	0	16977.8	-50.9005
15 - 17	7.61601e-54	1.17683e-53	16977.8	-15.4416
16 - 17	3.15929e-88	5.77582e-88	16977.8	-19.9573
10 - 18	1.31256e-18	1.65057e-18	16977.8	-8.73333
11 - 18	9.1515e-35	1.27443e-34	16977.8	-12.2616
12 - 18	2.09659e-05	2.32542e-05	16977.8	4.0973
14 - 18	1.19643e-70	2.00829e-70	16977.8	-17.7879
15 - 18	1.19175e-80	2.09065e-80	16977.8	19.0515
16 - 18	1.22375e-36	1.71905e-36	16977.8	12.6085
17 - 18	5.03142e-226	1.52977e-225	16977.8	32.4088
10 - 19	2.98515e-23	3.85709e-23	16977.8	9.87361
11 - 19	7.54664e-21	9.62965e-21	16977.8	9.3005
12 - 19	1.35009e-121	2.79945e-121	16977.8	23.5494
14 - 19	5.24427e-09	6.061e-09	16977.8	5.72457
15 - 19	0	0	16977.8	40.7093
16 - 19	5.41704e-240	1.72611e-239	16977.8	33.4274
17 - 19	0	0	16977.8	51.9567
18 - 19	1.88973e-102	3.64378e-102	16977.8	21.5586
10 - 21	0.00684378	0.00729658	16977.8	2.46554
11 - 21	0.217228	0.220751	16977.8	0.781601
12 - 21	2.21049e-54	3.43448e-54	16977.8	15.5219
14 - 21	0.000320291	0.000350425	16977.8	-3.41426
15 - 21	3.57568e-211	1.0263e-210	16977.8	31.2925
16 - 21	3.48751e-132	7.53622e-132	16977.8	24.5842
17 - 21	0	0	16977.8	43.2166
18 - 21	2.93769e-37	4.16295e-37	16977.8	12.7212
19 - 21	6.17792e-17	7.66633e-17	16977.8	-8.28542
10 - 23	2.55952e-77	4.42135e-77	16977.8	18.6397
11 - 23	1.388e-84	2.48517e-84	16977.8	19.5268
12 - 23	6.20409e-238	1.96028e-237	16977.8	33.2791
14 - 23	6.93936e-63	1.11983e-62	16977.8	16.7436
15 - 23	0	0	16977.8	52.6039
16 - 23	0	0	16977.8	44.4028
17 - 23	0	0	16977.8	62.9836
18 - 23	1.18315e-225	3.56844e-225	16977.8	32.3813
19 - 23	6.70069e-23	8.63814e-23	16977.8	9.79189
21 - 23	1.0033e-73	1.70697e-73	16977.8	18.1856
10 - 24	1.34144e-215	3.94047e-215	16977.8	-31.6289
11 - 24	1.11378e-283	4.11917e-283	16977.8	-36.4456
12 - 24	1.10531e-107	2.17211e-107	16977.8	-22.1197
14 - 24	0	0	16977.8	-41.6293
15 - 24	1.48949e-38	2.12407e-38	16977.8	-12.9536
16 - 24	6.32748e-64	1.02696e-63	16977.8	-16.8871
17 - 24	0.407294	0.409108	16977.8	-0.234513
18 - 24	7.3484e-160	1.77875e-159	16977.8	-27.1121
19 - 24	0	0	16977.8	-43.5898
21 - 24	6.637e-284	2.46268e-283	16977.8	-36.4606
23 - 24	0	0	16977.8	-52.2828
10 - 25	6.7832e-13	8.1659e-13	16977.8	7.09206
11 - 25	5.51433e-10	6.41916e-10	16977.8	6.0961
12 - 25	1.51897e-105	2.95925e-105	16977.8	21.8921
14 - 25	0.0356007	0.0369435	16977.8	1.80427
15 - 25	0	0	16977.8	41.2716
16 - 25	7.71295e-233	2.37711e-232	16977.8	32.9093
17 - 25	0	0	16977.8	53.1522
18 - 25	2.19602e-86	3.96338e-86	16977.8	19.7407
19 - 25	1.33285e-05	1.48416e-05	16977.8	-4.20108
21 - 25	2.26925e-07	2.5908e-07	16977.8	5.0462
23 - 25	3.32904e-53	5.12299e-53	16977.8	-15.3452
24 - 25	0	0	16977.8	43.2548
10 - 26	3.05004e-230	9.34903e-230	16977.8	-32.7194
11 - 26	0	0	16977.8	-39.4669
12 - 26	2.47989e-104	4.81466e-104	16977.8	-21.762
14 - 26	0	0	16977.8	-46.6905
15 - 26	6.06654e-28	8.09829e-28	16977.8	-10.9084
16 - 26	2.35454e-55	3.6939e-55	16977.8	-15.6663
17 - 26	6.99999e-06	7.81008e-06	16977.8	4.34473
18 - 26	2.11933e-172	5.34811e-172	16977.8	-28.1871
19 - 26	0	0	16977.8	-48.0441
21 - 26	0	0	16977.8	-39.2562
23 - 26	0	0	16977.8	-59.1004
24 - 26	4.99217e-05	5.49918e-05	16977.8	3.8916
25 - 26	0	0	16977.8	-48.9232
10 - 27	2.66424e-183	6.90866e-183	16977.8	-29.0913
11 - 27	1.02432e-252	3.39834e-252	16977.8	-34.3312
12 - 27	1.19837e-78	2.08285e-78	16977.8	-18.8051
14 - 27	0	0	16977.8	-40.1107
15 - 27	4.16388e-18	5.21293e-18	16977.8	-8.60145
16 - 27	7.8209e-39	1.11812e-38	16977.8	-13.0033
17 - 27	3.2638e-07	3.70751e-07	16977.8	4.9762
18 - 27	1.41529e-127	2.99522e-127	16977.8	-24.139
19 - 27	0	0	16977.8	-42.1118
21 - 27	1.06461e-252	3.52163e-252	16977.8	-34.3301
23 - 27	0	0	16977.8	-51.6852
24 - 27	3.09133e-06	3.47659e-06	16977.8	4.52102
25 - 27	0	0	16977.8	-41.9328
26 - 27	0.146594	0.14951	16977.8	1.05118
10 - 28	3.15798e-299	1.21993e-298	16977.8	-37.4667
11 - 28	0	0	16977.8	-45.1317
12 - 28	2.0937e-154	4.95114e-154	16977.8	-26.6318
14 - 28	0	0	16977.8	-53.0323
15 - 28	2.7192e-59	4.32618e-59	16977.8	-16.2383
16 - 28	6.93083e-96	1.30083e-95	16977.8	-20.8342
17 - 28	0.398931	0.401422	16977.8	-0.256117
18 - 28	5.45892e-244	1.75432e-243	16977.8	-33.7137
19 - 28	0	0	16977.8	-53.8081
21 - 28	0	0	16977.8	-44.7558
23 - 28	0	0	16977.8	-65.3116
24 - 28	0.490124	0.490559	16977.8	0.024758
25 - 28	0	0	16977.8	-55.4276
26 - 28	1.13573e-06	1.28367e-06	16977.8	-4.72875
27 - 28	5.06263e-08	5.8035e-08	16977.8	-5.32603
10 - 29	1.16414e-127	2.46832e-127	16977.8	24.1472
11 - 29	4.17746e-155	9.89952e-155	16977.8	26.6939
12 - 29	0	0	16977.8	40.946
14 - 29	1.79895e-132	3.90235e-132	16977.8	24.6117
15 - 29	0	0	16977.8	65.3395
16 - 29	0	0	16977.8	54.7935
17 - 29	0	0	16977.8	74.7329
18 - 29	0	0	16977.8	41.5446
19 - 29	1.93605e-54	3.01223e-54	16977.8	15.5305
21 - 29	6.19247e-135	1.34588e-134	16977.8	24.8463
23 - 29	1.6957e-06	1.91084e-06	16977.8	4.64662
24 - 29	0	0	16977.8	59.6553
25 - 29	3.3014e-118	6.75859e-118	16977.8	23.209
26 - 29	0	0	16977.8	70.6618
27 - 29	0	0	16977.8	60.2947
28 - 29	0	0	16977.8	78.1387
10 - 30	1.68731e-12	2.00981e-12	16977.8	6.96463
11 - 30	1.39465e-09	1.61848e-09	16977.8	5.94571
12 - 30	2.83394e-93	5.26637e-93	16977.8	20.5392
14 - 30	0.0192268	0.0201935	16977.8	2.0701
15 - 30	1.6796e-298	6.46615e-298	16977.8	37.4196
16 - 30	1.33935e-197	3.6317e-197	16977.8	30.2391
17 - 30	0	0	16977.8	48.9933
18 - 30	4.21428e-74	7.18082e-74	16977.8	18.2337
19 - 30	0.000368902	0.000402828	16977.8	-3.37555
21 - 30	2.71901e-07	3.0949e-07	16977.8	5.01149
23 - 30	8.52238e-41	1.23089e-40	16977.8	-13.3468
24 - 30	0	0	16977.8	41.0533
25 - 30	0.316136	0.319535	16977.8	0.478538
26 - 30	0	0	16977.8	45.028
27 - 30	0	0	16977.8	39.3543
28 - 30	0	0	16977.8	50.7723
29 - 30	2.1948e-85	3.94853e-85	16977.8	-19.6223
10 - 31	1.58885e-119	3.27049e-119	16977.8	23.3419
11 - 31	9.25053e-143	2.0953e-142	16977.8	25.5781
12 - 31	0	0	16977.8	39.7465
14 - 31	1.36719e-119	2.81936e-119	16977.8	23.3485
15 - 31	0	0	16977.8	63.1518
16 - 31	0	0	16977.8	53.0726
17 - 31	0	0	16977.8	72.7739
18 - 31	0	0	16977.8	40.0489
19 - 31	6.50533e-49	9.75799e-49	16977.8	14.6842
21 - 31	2.11111e-124	4.40987e-124	16977.8	23.8278
23 - 31	3.07006e-05	3.39513e-05	16977.8	4.00805
24 - 31	0	0	16977.8	58.5186
25 - 31	5.07601e-106	9.9233e-106	16977.8	21.943
26 - 31	0	0	16977.8	68.7332
27 - 31	0	0	16977.8	58.9309
28 - 31	0	0	16977.8	75.9662
29 - 31	0.26509	0.268421	16977.8	-0.62774
30 - 31	1.34094e-77	2.31991e-77	16977.8	18.6748
10 - 32	1.90047e-82	3.36536e-82	16977.8	-19.2701
11 - 32	1.94558e-135	4.24491e-135	16977.8	-24.8939
12 - 32	2.04883e-11	2.41745e-11	16977.8	-6.60346
14 - 32	2.72199e-221	8.14431e-221	16977.8	-32.0569
15 - 32	1.89368e-14	2.3018e-14	16977.8	7.57253
16 - 32	0.0856631	0.0877638	16977.8	1.36799
17 - 32	3.37819e-112	6.74442e-112	16977.8	22.5931
18 - 32	2.51688e-34	3.48776e-34	16977.8	-12.1789
19 - 32	2.55356e-255	8.59824e-255	16977.8	-34.5135
21 - 32	2.27193e-136	4.97618e-136	16977.8	-24.982
23 - 32	0	0	16977.8	-46.4993
24 - 32	6.67164e-78	1.15601e-77	16977.8	18.7125
25 - 32	5.23263e-254	1.75146e-253	16977.8	-34.4218
26 - 32	9.52888e-73	1.61148e-72	16977.8	18.0601
27 - 32	3.67574e-50	5.57289e-50	16977.8	14.8794
28 - 32	8.25261e-123	1.71435e-122	16977.8	23.6702
29 - 32	0	0	16977.8	-58.929
30 - 32	8.47662e-209	2.40242e-208	16977.8	-31.1105
31 - 32	0	0	16977.8	-56.7861
10 - 33	9.3012e-52	1.42165e-51	16977.8	-15.1256
11 - 33	5.72615e-79	9.96774e-79	16977.8	-18.8448
12 - 33	3.39001e-05	3.74528e-05	16977.8	-3.98455
14 - 33	1.35902e-124	2.84411e-124	16977.8	-23.8466
15 - 33	7.03911e-16	8.6588e-16	16977.8	7.98997
16 - 33	0.00197114	0.00211958	16977.8	2.88301
17 - 33	6.30159e-95	1.17685e-94	16977.8	20.7264
18 - 33	7.95255e-17	9.85767e-17	16977.8	-8.25523
19 - 33	1.13592e-157	2.7262e-157	16977.8	-26.9203
21 - 33	1.92885e-81	3.3943e-81	16977.8	-19.148
23 - 33	4.48299e-282	1.64717e-281	16977.8	-36.3388
24 - 33	1.39718e-72	2.35931e-72	16977.8	18.0387
25 - 33	2.53968e-142	5.72952e-142	16977.8	-25.5376
26 - 33	9.40045e-64	1.52352e-63	16977.8	16.8635
27 - 33	1.57703e-47	2.35927e-47	16977.8	14.4646
28 - 33	1.16858e-101	2.24558e-101	16977.8	21.4725
29 - 33	0	0	16977.8	-43.8003
30 - 33	1.71172e-126	3.59557e-126	16977.8	-24.0332
31 - 33	0	0	16977.8	-42.6415
32 - 33	0.0323809	0.0336642	16977.8	1.84698
10 - 34	1.67708e-08	1.92839e-08	16977.8	5.52361
11 - 34	1.08212e-05	1.20615e-05	16977.8	4.24805
12 - 34	2.53901e-87	4.61937e-87	16977.8	19.8511
14 - 34	0.463509	0.464745	16977.8	-0.0915994
15 - 34	0	0	16977.8	38.1858
16 - 34	2.01928e-198	5.51512e-198	16977.8	30.3038
17 - 34	0	0	16977.8	50.1874
18 - 34	4.72058e-68	7.83061e-68	16977.8	17.4454
19 - 34	5.12856e-09	5.93334e-09	16977.8	-5.72836
21 - 34	0.000504861	0.000549164	16977.8	3.28819
23 - 34	1.03984e-61	1.66848e-61	16977.8	-16.5799
24 - 34	0	0	16977.8	41.2201
25 - 34	0.031042	0.0323021	16977.8	-1.86578
26 - 34	0	0	16977.8	46.0129
27 - 34	0	0	16977.8	39.6373
28 - 34	0	0	16977.8	52.2421
29 - 34	2.40664e-128	5.14146e-128	16977.8	-24.2138
30 - 34	0.016828	0.0177237	16977.8	-2.12429
31 - 34	3.84194e-116	7.7665e-116	16977.8	-22.999
32 - 34	3.59835e-213	1.04343e-212	16977.8	31.4447
33 - 34	2.54541e-121	5.26829e-121	16977.8	23.5219
10 - 35	6.09013e-06	6.80165e-06	16977.8	-4.37522
11 - 35	8.65242e-13	1.03829e-12	16977.8	-7.05824
12 - 35	8.70541e-17	1.0779e-16	16977.8	8.24439
14 - 35	1.36677e-32	1.87328e-32	16977.8	-11.8467
15 - 35	3.82399e-116	7.74409e-116	16977.8	22.9993
16 - 35	1.49535e-62	2.40964e-62	16977.8	16.6973
17 - 35	1.06158e-270	3.76562e-270	16977.8	35.5731
18 - 35	1.15109e-06	1.29973e-06	16977.8	4.72602
19 - 35	1.04732e-57	1.64997e-57	16977.8	-16.0103
21 - 35	1.11193e-14	1.35595e-14	16977.8	-7.64152
23 - 35	1.12914e-148	2.637e-148	16977.8	-26.1182
24 - 35	9.77851e-196	2.6325e-195	16977.8	30.0918
25 - 35	3.05539e-42	4.45858e-42	16977.8	-13.5943
26 - 35	1.87222e-214	5.47115e-214	16977.8	31.5422
27 - 35	3.33213e-163	8.15324e-163	16977.8	27.4026
28 - 35	3.47956e-290	1.30831e-289	16977.8	36.8759
29 - 35	3.42577e-244	1.10408e-243	16977.8	-33.7281
30 - 35	1.16376e-37	1.6533e-37	16977.8	-12.7938
31 - 35	1.0492e-227	3.19864e-227	16977.8	-32.5329
32 - 35	2.26761e-61	3.62818e-61	16977.8	16.5325
33 - 35	5.28856e-34	7.30171e-34	16977.8	12.1178
34 - 35	2.17245e-31	2.96315e-31	16977.8	-11.6113
10 - 38	1.07837e-263	3.70854e-263	16977.8	-35.094
11 - 38	0	0	16977.8	-42.2714
12 - 38	2.61163e-128	5.56885e-128	16977.8	-24.2104
14 - 38	0	0	16977.8	-49.8022
15 - 38	2.87236e-42	4.20236e-42	16977.8	-13.5989
16 - 38	2.2159e-74	3.78145e-74	16977.8	-18.2693
17 - 38	0.02343	0.024494	16977.8	1.98766
18 - 38	1.2746e-206	3.59439e-206	16977.8	-30.9429
19 - 38	0	0	16977.8	-50.8834
21 - 38	0	0	16977.8	-41.9827
23 - 38	0	0	16977.8	-62.1337
24 - 38	0.0283069	0.0295104	16977.8	1.90637
25 - 38	0	0	16977.8	-52.1071
26 - 38	0.00790542	0.00841256	16977.8	-2.41342
27 - 38	0.000607916	0.000660626	16977.8	-3.23551
28 - 38	0.0105435	0.0111568	16977.8	2.30657
29 - 38	0	0	16977.8	-74.2584
30 - 38	0	0	16977.8	-47.8622
31 - 38	0	0	16977.8	-72.2221
32 - 38	3.10396e-96	5.84518e-96	16977.8	-20.8734
33 - 38	8.50266e-82	1.49859e-81	16977.8	-19.1912
34 - 38	0	0	16977.8	-49.0731
35 - 38	7.40416e-251	2.43496e-250	16977.8	-34.2005
10 - 40	7.60662e-249	2.49426e-248	16977.8	-34.0586
11 - 40	0	0	16977.8	-40.8975
12 - 40	1.42707e-118	2.92678e-118	16977.8	-23.2458
14 - 40	0	0	16977.8	-48.1234
15 - 40	6.6594e-37	9.40151e-37	16977.8	-12.6567
16 - 40	5.61426e-67	9.23162e-67	16977.8	-17.3016
17 - 40	0.00462797	0.0049576	16977.8	2.60266
18 - 40	2.90513e-191	7.65652e-191	16977.8	-29.7355
19 - 40	0	0	16977.8	-49.3885
21 - 40	0	0	16977.8	-40.6628
23 - 40	0	0	16977.8	-60.3683
24 - 40	0.00755568	0.00804797	16977.8	2.42987
25 - 40	0	0	16977.8	-50.3451
26 - 40	0.042298	0.0438128	16977.8	-1.72469
27 - 40	0.00459618	0.00492822	16977.8	-2.60502
28 - 40	0.00167996	0.00181166	16977.8	2.93302
29 - 40	0	0	16977.8	-71.8672
30 - 40	0	0	16977.8	-46.4044
31 - 40	0	0	16977.8	-69.9536
32 - 40	1.22293e-86	2.21423e-86	16977.8	-19.7707
33 - 40	6.48969e-75	1.11252e-74	16977.8	-18.3371
34 - 40	0	0	16977.8	-47.4409
35 - 40	3.15097e-234	9.8457e-234	16977.8	-33.0105
38 - 40	0.255837	0.259518	16977.8	0.656243
10 - 41	2.49134e-05	2.76054e-05	16977.8	4.05715
11 - 41	0.00508348	0.00544038	16977.8	2.57029
12 - 41	7.17795e-70	1.20129e-69	16977.8	17.6859
14 - 41	0.0465668	0.048058	16977.8	-1.67916
15 - 41	2.80442e-256	9.47122e-256	16977.8	34.5804
16 - 41	9.53167e-163	2.32721e-162	16977.8	27.3631
17 - 41	0	0	16977.8	46.5519
18 - 41	2.39715e-51	3.65403e-51	16977.8	15.0626
19 - 41	2.7031e-12	3.20958e-12	16977.8	-6.89784
21 - 41	0.0438852	0.0453735	16977.8	1.70735
23 - 41	2.77735e-66	4.56019e-66	16977.8	-17.2082
24 - 41	0	0	16977.8	38.8123
25 - 41	0.000375738	0.000409896	16977.8	-3.37049
26 - 41	0	0	16977.8	42.4953
27 - 41	5.26976e-291	1.99473e-290	16977.8	36.9299
28 - 41	0	0	16977.8	48.3143
29 - 41	1.06594e-128	2.28156e-128	16977.8	-24.2482
30 - 41	0.000253178	0.000277536	16977.8	-3.47783
31 - 41	1.13273e-117	2.3022e-117	16977.8	-23.1547
32 - 41	4.05857e-171	1.01961e-170	16977.8	28.079
33 - 41	2.34071e-100	4.47512e-100	16977.8	21.3302
34 - 41	0.0582377	0.0599928	16977.8	-1.5698
35 - 41	2.70658e-22	3.47329e-22	16977.8	9.64921
38 - 41	0	0	16977.8	45.3683
40 - 41	0	0	16977.8	43.9125
10 - 42	8.32493e-55	1.29883e-54	16977.8	-15.5851
11 - 42	1.0485e-95	1.96463e-95	16977.8	-20.8141
12 - 42	0.00949905	0.0100704	16977.8	-2.34572
14 - 42	1.7459e-169	4.36668e-169	16977.8	-27.9406
15 - 42	5.32523e-39	7.62292e-39	16977.8	13.0329
16 - 42	1.5949e-10	1.86623e-10	16977.8	6.29182
17 - 42	4.86806e-169	1.21486e-168	16977.8	27.9028
18 - 42	1.54999e-14	1.88811e-14	16977.8	-7.59855
19 - 42	1.08452e-204	3.02807e-204	16977.8	-30.7936
21 - 42	1.87998e-97	3.55809e-97	16977.8	-21.0093
23 - 42	0	0	16977.8	-43.1026
24 - 42	1.82152e-114	3.67563e-114	16977.8	22.8274
25 - 42	5.12934e-199	1.41119e-198	16977.8	-30.3506
26 - 42	2.99657e-119	6.15688e-119	16977.8	23.3142
27 - 42	2.65768e-83	4.72105e-83	16977.8	19.3731
28 - 42	4.21004e-185	1.10184e-184	16977.8	29.2382
29 - 42	0	0	16977.8	-55.8882
30 - 42	1.58755e-161	3.85109e-161	16977.8	-27.2572
31 - 42	0	0	16977.8	-53.6535
32 - 42	4.91345e-08	5.63822e-08	16977.8	5.33147
33 - 42	0.00928436	0.00985208	16977.8	2.35423
34 - 42	1.20715e-162	2.94095e-162	16977.8	-27.3542
35 - 42	5.04084e-35	7.03721e-35	16977.8	-12.3101
38 - 42	2.43895e-150	5.74349e-150	16977.8	26.2684
40 - 42	1.04285e-136	2.29753e-136	16977.8	25.0139
41 - 42	1.13844e-126	2.39582e-126	16977.8	-24.0506
10 - 43	2.24282e-92	4.14737e-92	16977.8	-20.4368
11 - 43	2.65498e-142	5.97767e-142	16977.8	-25.5358
12 - 43	2.6512e-18	3.32283e-18	16977.8	-8.65325
14 - 43	1.96295e-218	5.79635e-218	16977.8	-31.8427
15 - 43	2.65746e-05	2.94173e-05	16977.8	4.04203
16 - 43	0.0723855	0.0742956	16977.8	-1.4583
17 - 43	1.82734e-74	3.12309e-74	16977.8	18.28
18 - 43	4.76762e-44	7.01157e-44	16977.8	-13.8977
19 - 43	2.27101e-253	7.55663e-253	16977.8	-34.3771
21 - 43	1.29744e-143	2.96858e-143	16977.8	-25.6567
23 - 43	0	0	16977.8	-45.1885
24 - 43	1.42009e-54	2.21251e-54	16977.8	15.5506
25 - 43	9.84086e-247	3.19899e-246	16977.8	-33.909
26 - 43	7.76272e-45	1.14612e-44	16977.8	14.028
27 - 43	3.20036e-31	4.35991e-31	16977.8	11.5779
28 - 43	6.27316e-81	1.1022e-80	16977.8	19.0855
29 - 43	0	0	16977.8	-55.3582
30 - 43	1.73218e-210	4.94659e-210	16977.8	-31.2401
31 - 43	0	0	16977.8	-53.6836
32 - 43	0.00183167	0.00197338	16977.8	-2.90606
33 - 43	1.65417e-05	1.83833e-05	16977.8	-4.15189
34 - 43	9.00108e-212	2.59011e-211	16977.8	-31.3382
35 - 43	2.29308e-71	3.86636e-71	16977.8	-17.8814
38 - 43	1.0412e-61	1.66829e-61	16977.8	16.5798
40 - 43	2.74108e-55	4.29435e-55	16977.8	15.6566
41 - 43	3.57173e-175	9.11518e-175	16977.8	-28.4197
42 - 43	3.56358e-15	4.36452e-15	16977.8	-7.78702
10 - 44	6.13638e-09	7.08478e-09	16977.8	-5.69781
11 - 44	1.01459e-15	1.24668e-15	16977.8	-7.94466
12 - 44	5.00977e-07	5.67942e-07	16977.8	4.89248
14 - 44	5.49815e-32	7.5266e-32	16977.8	-11.7288
15 - 44	1.89359e-60	3.02117e-60	16977.8	16.4027
16 - 44	3.33113e-31	4.53259e-31	16977.8	11.5745
17 - 44	1.088e-164	2.68547e-164	16977.8	27.5308
18 - 44	0.0464691	0.0480011	16977.8	1.68016
19 - 44	5.86321e-53	9.01049e-53	16977.8	-15.3081
21 - 44	1.71099e-17	2.1326e-17	16977.8	-8.43728
23 - 44	1.99471e-120	4.12093e-120	16977.8	-23.4324
24 - 44	1.18007e-130	2.5403e-130	16977.8	24.4373
25 - 44	2.6228e-39	3.75924e-39	16977.8	-13.0872
26 - 44	7.5856e-127	1.59936e-126	16977.8	24.0678
27 - 44	1.25413e-101	2.40589e-101	16977.8	21.4692
28 - 44	1.02289e-173	2.59284e-173	16977.8	28.2977
29 - 44	1.35712e-177	3.47128e-177	16977.8	-28.6212
30 - 44	6.9631e-37	9.81797e-37	16977.8	-12.6532
31 - 44	1.18442e-168	2.9493e-168	16977.8	-27.8699
32 - 44	1.55256e-28	2.08487e-28	16977.8	11.0323
33 - 44	5.12913e-17	6.37188e-17	16977.8	8.30759
34 - 44	3.68666e-31	5.01031e-31	16977.8	-11.5657
35 - 44	0.0171465	0.0180422	16977.8	-2.11673
38 - 44	1.38215e-149	3.2413e-149	16977.8	26.2006
40 - 44	1.55813e-140	3.48033e-140	16977.8	25.3719
41 - 44	5.02697e-24	6.54784e-24	16977.8	-10.0514
42 - 44	3.70144e-14	4.48949e-14	16977.8	7.4848
43 - 44	8.41555e-37	1.18511e-36	16977.8	12.6382
10 - 45	1.36257e-69	2.27701e-69	16977.8	17.6493
11 - 45	5.78306e-77	9.95923e-77	16977.8	18.5955
12 - 45	3.84006e-235	1.20322e-234	16977.8	33.0769
14 - 45	4.14529e-55	6.4763e-55	16977.8	15.63
15 - 45	0	0	16977.8	54.0939
16 - 45	0	0	16977.8	45.0842
17 - 45	0	0	16977.8	64.5913
18 - 45	5.29352e-225	1.59229e-224	16977.8	32.3331
19 - 45	1.00909e-16	1.24808e-16	16977.8	8.22666
21 - 45	6.00968e-66	9.85307e-66	16977.8	17.1629
23 - 45	0.0108935	0.0115163	16977.8	-2.2942
24 - 45	0	0	16977.8	52.6253
25 - 45	2.18997e-45	3.2376e-45	16977.8	14.1182
26 - 45	0	0	16977.8	60.546
27 - 45	0	0	16977.8	52.2572
28 - 45	0	0	16977.8	67.2577
29 - 45	3.67032e-15	4.49037e-15	16977.8	-7.78328
30 - 45	1.98473e-33	2.73355e-33	16977.8	12.0083
31 - 45	1.46436e-12	1.74793e-12	16977.8	-6.98459
32 - 45	0	0	16977.8	47.672
33 - 45	2.1136e-280	7.71567e-280	16977.8	36.227
34 - 45	6.51938e-54	1.00876e-53	16977.8	15.4517
35 - 45	7.93427e-143	1.80077e-142	16977.8	25.5842
38 - 45	0	0	16977.8	63.8083
40 - 45	0	0	16977.8	61.8377
41 - 45	1.72864e-58	2.72715e-58	16977.8	16.1232
42 - 45	0	0	16977.8	44.1885
43 - 45	0	0	16977.8	45.8579
44 - 45	9.33561e-113	1.87044e-112	16977.8	22.651
10 - 46	5.82053e-50	8.80102e-50	16977.8	-14.8483
11 - 46	3.63846e-85	6.53533e-85	16977.8	-19.5961
12 - 46	0.020976	0.0219897	16977.8	-2.0341
14 - 46	1.783e-148	4.15542e-148	16977.8	-26.1002
15 - 46	1.06168e-36	1.49324e-36	16977.8	12.6198
16 - 46	2.16259e-10	2.52526e-10	16977.8	6.24432
17 - 46	2.91387e-158	7.00821e-158	16977.8	26.9722
18 - 46	1.46005e-12	1.74464e-12	16977.8	-6.985
19 - 46	6.21028e-184	1.6141e-183	16977.8	-29.1429
21 - 46	2.7653e-87	5.02295e-87	16977.8	-19.8468
23 - 46	0	0	16977.8	-40.7157
24 - 46	3.62894e-110	7.1689e-110	16977.8	22.3813
25 - 46	8.27209e-174	2.10156e-173	16977.8	-28.3054
26 - 46	8.50843e-112	1.69567e-111	16977.8	22.5514
27 - 46	1.1851e-79	2.07254e-79	16977.8	18.9291
28 - 46	3.05832e-172	7.70041e-172	16977.8	28.1737
29 - 46	0	0	16977.8	-51.8648
30 - 46	1.2342e-144	2.84698e-144	16977.8	-25.7505
31 - 46	0	0	16977.8	-49.9768
32 - 46	5.70065e-08	6.52826e-08	16977.8	5.30439
33 - 46	0.00651142	0.00695538	16977.8	2.48332
34 - 46	5.26253e-143	1.1968e-142	16977.8	-25.6007
35 - 46	5.07635e-31	6.89064e-31	16977.8	-11.5381
38 - 46	1.96826e-140	4.38774e-140	16977.8	25.3625
40 - 46	3.50897e-128	7.46814e-128	16977.8	24.1979
41 - 46	1.27707e-112	2.55415e-112	16977.8	-22.6369
42 - 46	0.39303	0.395837	16977.8	0.271434
43 - 46	8.30303e-15	1.01362e-14	16977.8	7.67912
44 - 46	7.18436e-13	8.63041e-13	16977.8	-7.08409
45 - 46	0	0	16977.8	-41.3811
10 - 47	5.11576e-92	9.44449e-92	16977.8	-20.3959
11 - 47	2.50853e-139	5.57012e-139	16977.8	-25.2595
12 - 47	3.47927e-19	4.39487e-19	16977.8	-8.88267
14 - 47	8.31237e-211	2.37979e-210	16977.8	-31.2645
15 - 47	0.0003276	0.000358075	16977.8	3.4081
16 - 47	0.0288386	0.0300368	16977.8	-1.89823
17 - 47	4.10556e-67	6.76068e-67	16977.8	17.3199
18 - 47	1.87568e-44	2.7621e-44	16977.8	-13.9648
19 - 47	6.51366e-246	2.11133e-245	16977.8	-33.8507
21 - 47	7.45033e-141	1.67077e-140	16977.8	-25.4017
23 - 47	0	0	16977.8	-44.2729
24 - 47	4.96684e-50	7.52026e-50	16977.8	14.859
25 - 47	2.70807e-237	8.53269e-237	16977.8	-33.2328
26 - 47	8.85735e-40	1.276e-39	16977.8	13.1699
27 - 47	7.40653e-28	9.87537e-28	16977.8	10.8902
28 - 47	9.42499e-73	1.5963e-72	16977.8	18.0607
29 - 47	0	0	16977.8	-53.7364
30 - 47	9.37939e-205	2.63183e-204	16977.8	-30.7985
31 - 47	0	0	16977.8	-52.201
32 - 47	0.000444961	0.000484943	16977.8	-3.3236
33 - 47	3.61674e-06	4.06343e-06	16977.8	-4.48765
34 - 47	9.4792e-205	2.65324e-204	16977.8	-30.7981
35 - 47	3.9928e-71	6.71219e-71	16977.8	-17.85
38 - 47	3.46894e-55	5.42713e-55	16977.8	15.6414
40 - 47	2.00469e-49	3.02312e-49	16977.8	14.7644
41 - 47	1.17762e-170	2.9519e-170	16977.8	-28.0398
42 - 47	4.68119e-16	5.7709e-16	16977.8	-8.04023
43 - 47	0.317007	0.320129	16977.8	-0.476091
44 - 47	1.28722e-37	1.8264e-37	16977.8	-12.786
45 - 47	0	0	16977.8	-44.7746
46 - 47	1.08113e-15	1.327e-15	16977.8	-7.93676
10 - 49	4.47519e-41	6.48012e-41	16977.8	13.395
11 - 49	9.61925e-42	1.40007e-41	16977.8	13.5095
12 - 49	4.43985e-173	1.1229e-172	16977.8	28.2442
14 - 49	3.83594e-24	5.00803e-24	16977.8	10.0781
15 - 49	0	0	16977.8	47.8914
16 - 49	0	0	16977.8	39.4808
17 - 49	0	0	16977.8	58.9243
18 - 49	6.90149e-157	1.64934e-156	16977.8	26.8514
19 - 49	0.000306757	0.000335944	16977.8	3.42601
21 - 49	8.11168e-35	1.13102e-34	16977.8	12.2714
23 - 49	8.94685e-13	1.07248e-12	16977.8	-7.05358
24 - 49	0	0	16977.8	48.3474
25 - 49	1.04278e-17	1.30117e-17	16977.8	8.49516
26 - 49	0	0	16977.8	54.8664
27 - 49	0	0	16977.8	47.4797
28 - 49	0	0	16977.8	61.2881
29 - 49	1.39492e-39	2.00442e-39	16977.8	-13.1354
30 - 49	6.78917e-13	8.16437e-13	16977.8	7.09193
31 - 49	1.49364e-34	2.07236e-34	16977.8	-12.2216
32 - 49	0	0	16977.8	41.4208
33 - 49	8.81663e-215	2.58316e-214	16977.8	31.567
34 - 49	8.22299e-24	1.06738e-23	16977.8	10.0026
35 - 49	2.35331e-93	4.38041e-93	16977.8	20.5484
38 - 49	0	0	16977.8	58.0031
40 - 49	0	0	16977.8	56.2037
41 - 49	2.33092e-28	3.12265e-28	16977.8	10.9955
42 - 49	2.66391e-303	1.03617e-302	16977.8	37.7302
43 - 49	0	0	16977.8	40.354
44 - 49	4.4444e-78	7.71274e-78	16977.8	18.7345
45 - 49	1.08036e-07	1.23595e-07	16977.8	-5.1864
46 - 49	2.69779e-268	9.39229e-268	16977.8	35.4093
47 - 49	0	0	16977.8	39.5093
10 - 5	2.05125e-145	4.76092e-145	16977.8	25.8218
11 - 5	1.09997e-177	2.81992e-177	16977.8	28.6288
12 - 5	0	0	16977.8	42.5694
14 - 5	7.16445e-156	1.70856e-155	16977.8	26.7617
15 - 5	0	0	16977.8	66.8502
16 - 5	0	0	16977.8	56.3833
17 - 5	0	0	16977.8	76.0617
18 - 5	0	0	16977.8	43.3249
19 - 5	5.10135e-69	8.49974e-69	16977.8	17.5736
21 - 5	1.09505e-155	2.60045e-155	16977.8	26.7454
23 - 5	2.36077e-12	2.80901e-12	16977.8	6.91709
24 - 5	0	0	16977.8	60.9402
25 - 5	4.59872e-141	1.03334e-140	16977.8	25.4211
26 - 5	0	0	16977.8	72.0422
27 - 5	0	0	16977.8	61.6681
28 - 5	0	0	16977.8	79.4501
29 - 5	0.00258183	0.00277098	16977.8	2.79689
30 - 5	4.01309e-103	7.7513e-103	16977.8	21.6315
31 - 5	0.000451298	0.000491375	16977.8	3.31965
32 - 5	0	0	16977.8	60.5506
33 - 5	0	0	16977.8	45.341
34 - 5	4.4929e-151	1.06025e-150	16977.8	26.3344
35 - 5	6.41427e-270	2.26103e-269	16977.8	35.52
38 - 5	0	0	16977.8	75.6057
40 - 5	0	0	16977.8	73.2277
41 - 5	4.24637e-150	9.97897e-150	16977.8	26.2467
42 - 5	0	0	16977.8	57.5926
43 - 5	0	0	16977.8	56.9223
44 - 5	4.35839e-196	1.17614e-195	16977.8	30.1196
45 - 5	9.91293e-25	1.2987e-24	16977.8	10.2108
46 - 5	0	0	16977.8	53.5668
47 - 5	0	0	16977.8	55.28
49 - 5	1.14439e-53	1.76589e-53	16977.8	15.415
10 - 52	2.44618e-132	5.29615e-132	16977.8	-24.5989
11 - 52	8.09659e-193	2.14893e-192	16977.8	-29.8598
12 - 52	9.41362e-42	1.37191e-41	16977.8	-13.5111
14 - 52	8.25276e-277	2.99329e-276	16977.8	-35.9862
15 - 52	0.0208829	0.0219125	16977.8	-2.03595
16 - 52	1.32623e-12	1.5881e-12	16977.8	-6.99851
17 - 52	2.1019e-33	2.89139e-33	16977.8	12.0035
18 - 52	3.18023e-79	5.54451e-79	16977.8	-18.8763
19 - 52	0	0	16977.8	-38.2226
21 - 52	2.03377e-193	5.42338e-193	16977.8	-29.9076
23 - 52	0	0	16977.8	-48.5023
24 - 52	1.0484e-25	1.38316e-25	16977.8	10.4274
25 - 52	9.31201e-307	3.6472e-306	16977.8	-37.9524
26 - 52	1.65108e-15	2.02437e-15	16977.8	7.88391
27 - 52	3.99587e-10	4.65634e-10	16977.8	6.14748
28 - 52	1.86195e-36	2.61228e-36	16977.8	12.5752
29 - 52	0	0	16977.8	-58.0225
30 - 52	4.40163e-266	1.52302e-265	16977.8	-35.258
31 - 52	0	0	16977.8	-56.4817
32 - 52	1.65589e-18	2.08001e-18	16977.8	-8.70695
33 - 52	7.63411e-20	9.67558e-20	16977.8	-9.05034
34 - 52	2.01257e-269	7.07219e-269	16977.8	-35.4862
35 - 52	2.40208e-111	4.76195e-111	16977.8	-22.5045
38 - 52	5.64833e-25	7.41713e-25	16977.8	10.2654
40 - 52	1.27092e-21	1.62909e-21	16977.8	9.4887
41 - 52	5.48069e-229	1.6754e-228	16977.8	-32.6273
42 - 52	2.2665e-41	3.29461e-41	16977.8	-13.4458
43 - 52	1.52323e-08	1.75327e-08	16977.8	-5.54051
44 - 52	1.928e-63	3.12021e-63	16977.8	-16.8205
45 - 52	0	0	16977.8	-49.1611
46 - 52	1.29689e-39	1.86593e-39	16977.8	-13.1409
47 - 52	3.8614e-07	4.38195e-07	16977.8	-4.94351
49 - 52	0	0	16977.8	-43.9733
5 - 52	0	0	16977.8	-59.4951
10 - 53	2.65558e-138	5.86203e-138	16977.8	-25.1637
11 - 53	2.79938e-198	7.62729e-198	16977.8	-30.2926
12 - 53	1.26655e-46	1.87982e-46	16977.8	-14.3193
14 - 53	3.00256e-280	1.09255e-279	16977.8	-36.2169
15 - 53	0.000677441	0.000735471	16977.8	-3.20446
16 - 53	6.43388e-16	7.92294e-16	16977.8	-8.00107
17 - 53	1.84497e-26	2.44263e-26	16977.8	10.592
18 - 53	4.25905e-85	7.63785e-85	16977.8	-19.588
19 - 53	0	0	16977.8	-38.4509
21 - 53	5.82598e-199	1.59895e-198	16977.8	-30.3463
23 - 53	0	0	16977.8	-48.4385
24 - 53	8.95994e-21	1.14201e-20	16977.8	9.28216
25 - 53	0	0	16977.8	-38.1146
26 - 53	2.88142e-11	3.3892e-11	16977.8	6.55265
27 - 53	3.18334e-07	3.61977e-07	16977.8	4.98104
28 - 53	6.82037e-29	9.1697e-29	16977.8	11.1063
29 - 53	0	0	16977.8	-57.4915
30 - 53	1.83658e-270	6.49425e-270	16977.8	-35.557
31 - 53	0	0	16977.8	-56.0409
32 - 53	1.48948e-22	1.91359e-22	16977.8	-9.7105
33 - 53	1.6506e-23	2.13763e-23	16977.8	-9.93308
34 - 53	3.67653e-273	1.32074e-272	16977.8	-35.74
35 - 53	2.42237e-117	4.91444e-117	16977.8	-23.1212
38 - 53	3.96803e-19	5.00664e-19	16977.8	8.86799
40 - 53	2.21458e-16	2.73608e-16	16977.8	8.13168
41 - 53	7.23291e-234	2.25379e-233	16977.8	-32.9842
42 - 53	1.09098e-46	1.62137e-46	16977.8	-14.3297
43 - 53	2.60257e-11	3.06441e-11	16977.8	-6.56785
44 - 53	1.54536e-68	2.57103e-68	16977.8	-17.5099
45 - 53	0	0	16977.8	-49.0027
46 - 53	9.32288e-45	1.37467e-44	16977.8	-14.0149
47 - 53	1.25873e-09	1.46225e-09	16977.8	-5.96251
49 - 53	0	0	16977.8	-43.9885
5 - 53	0	0	16977.8	-58.9398
52 - 53	0.133313	0.136088	16977.8	-1.11089
10 - 55	2.21469e-98	4.21277e-98	16977.8	21.1124
11 - 55	1.08649e-111	2.16148e-111	16977.8	22.5404
12 - 55	7.90292e-282	2.89432e-281	16977.8	36.3224
14 - 55	1.27685e-88	2.33813e-88	16977.8	20.0032
15 - 55	0	0	16977.8	56.9239
16 - 55	0	0	16977.8	48.1516
17 - 55	0	0	16977.8	67.0164
18 - 55	4.95618e-275	1.78612e-274	16977.8	35.8664
19 - 55	7.40084e-36	1.03704e-35	16977.8	12.465
21 - 55	7.51682e-98	1.42504e-97	16977.8	21.0536
23 - 55	0.00684297	0.00730262	16977.8	2.46558
24 - 55	0	0	16977.8	55.1245
25 - 55	3.59023e-77	6.19232e-77	16977.8	18.6214
26 - 55	0	0	16977.8	63.0974
27 - 55	0	0	16977.8	54.8993
28 - 55	0	0	16977.8	69.6152
29 - 55	0.0229317	0.0239954	16977.8	-1.99675
30 - 55	1.11735e-58	1.76523e-58	16977.8	16.1504
31 - 55	0.0813436	0.0834142	16977.8	-1.39613
32 - 55	0	0	16977.8	50.765
33 - 55	0	0	16977.8	39.2981
34 - 55	1.2017e-86	2.17928e-86	16977.8	19.7716
35 - 55	1.17166e-184	3.05226e-184	16977.8	29.202
38 - 55	0	0	16977.8	66.267
40 - 55	0	0	16977.8	64.3443
41 - 55	2.15008e-90	3.9629e-90	16977.8	20.2091
42 - 55	0	0	16977.8	47.4684
43 - 55	0	0	16977.8	48.8738
44 - 55	1.41033e-144	3.24665e-144	16977.8	25.7452
45 - 55	2.41023e-07	2.7462e-07	16977.8	5.03466
46 - 55	0	0	16977.8	44.6828
47 - 55	0	0	16977.8	47.7684
49 - 55	2.35458e-23	3.04583e-23	16977.8	9.89747
5 - 55	5.44059e-06	6.08828e-06	16977.8	-4.39978
52 - 55	0	0	16977.8	51.9919
53 - 55	0	0	16977.8	51.7964
10 - 57	6.82105e-59	1.07912e-58	16977.8	16.1811
11 - 57	2.87202e-64	4.6748e-64	16977.8	16.9342
12 - 57	3.48055e-218	1.02508e-217	16977.8	31.824
14 - 57	3.5166e-43	5.15159e-43	16977.8	13.7528
15 - 57	0	0	16977.8	53.3037
16 - 57	0	0	16977.8	44.0535
17 - 57	0	0	16977.8	63.9718
18 - 57	3.17557e-207	8.97754e-207	16977.8	30.9894
19 - 57	1.17125e-10	1.37193e-10	16977.8	6.33964
21 - 57	2.64111e-54	4.0979e-54	16977.8	15.5104
23 - 57	3.04271e-06	3.42533e-06	16977.8	-4.52437
24 - 57	0	0	16977.8	51.7548
25 - 57	2.98804e-34	4.13559e-34	16977.8	12.1648
26 - 57	0	0	16977.8	59.85
27 - 57	0	0	16977.8	51.3709
28 - 57	0	0	16977.8	66.7273
29 - 57	1.19241e-26	1.58239e-26	16977.8	-10.633
30 - 57	1.12951e-24	1.47806e-24	16977.8	10.198
31 - 57	1.4768e-22	1.89947e-22	16977.8	-9.71137
32 - 57	0	0	16977.8	46.7224
33 - 57	3.51662e-263	1.2057e-262	16977.8	35.0587
34 - 57	2.99118e-42	4.37053e-42	16977.8	13.5959
35 - 57	1.97653e-127	4.17514e-127	16977.8	24.1248
38 - 57	0	0	16977.8	63.1894
40 - 57	0	0	16977.8	61.1626
41 - 57	5.56155e-47	8.27628e-47	16977.8	14.3769
42 - 57	0	0	16977.8	43.1509
43 - 57	0	0	16977.8	44.845
44 - 57	1.10928e-100	2.1244e-100	16977.8	21.3658
45 - 57	0.00914047	0.00970852	16977.8	-2.36003
46 - 57	0	0	16977.8	40.2561
47 - 57	0	0	16977.8	43.7408
49 - 57	0.00118196	0.00127829	16977.8	3.04055
5 - 57	2.42881e-39	3.48562e-39	16977.8	-13.093
52 - 57	0	0	16977.8	48.2176
53 - 57	0	0	16977.8	48.0569
55 - 57	5.47782e-14	6.63693e-14	16977.8	-7.43303
10 - 58	7.50849e-252	2.47648e-251	16977.8	-34.2705
11 - 58	0	0	16977.8	-41.5687
12 - 58	6.39912e-118	1.30528e-117	16977.8	-23.1799
14 - 58	0	0	16977.8	-49.3034
15 - 58	9.97204e-35	1.38699e-34	16977.8	-12.2546
16 - 58	2.9026e-65	4.75201e-65	16977.8	-17.0701
17 - 58	0.000204019	0.000223865	16977.8	3.53531
18 - 58	1.45863e-194	3.90816e-194	16977.8	-29.9987
19 - 58	0	0	16977.8	-50.3565
21 - 58	0	0	16977.8	-41.2705
23 - 58	0	0	16977.8	-61.8732
24 - 58	0.000706429	0.000766204	16977.8	3.19237
25 - 58	0	0	16977.8	-51.6777
26 - 58	0.175502	0.178831	16977.8	-0.932662
27 - 58	0.0279088	0.0291222	16977.8	-1.91255
28 - 58	4.65117e-05	5.13359e-05	16977.8	3.90874
29 - 58	0	0	16977.8	-74.5057
30 - 58	0	0	16977.8	-47.2752
31 - 58	0	0	16977.8	-72.3652
32 - 58	7.54644e-86	1.35981e-85	16977.8	-19.6773
33 - 58	4.58222e-73	7.77255e-73	16977.8	-18.101
34 - 58	0	0	16977.8	-48.5477
35 - 58	1.06607e-238	3.37787e-238	16977.8	-33.3342
38 - 58	0.0619357	0.063744	16977.8	1.53878
40 - 58	0.198998	0.20259	16977.8	0.84522
41 - 58	0	0	16977.8	-44.7353
42 - 58	1.54576e-138	3.41885e-138	16977.8	-25.1857
43 - 58	2.68111e-53	4.13154e-53	16977.8	-15.3594
44 - 58	1.38611e-139	3.08389e-139	16977.8	-25.2835
45 - 58	0	0	16977.8	-63.6644
46 - 58	5.01512e-129	1.07754e-128	16977.8	-24.2799
47 - 58	2.60367e-47	3.88485e-47	16977.8	-14.4297
49 - 58	0	0	16977.8	-57.6911
5 - 58	0	0	16977.8	-75.8641
52 - 58	1.47832e-19	1.87154e-19	16977.8	-8.97766
53 - 58	1.73904e-14	2.11611e-14	16977.8	-7.58361
55 - 58	0	0	16977.8	-66.1376
57 - 58	0	0	16977.8	-63.0626
10 - 59	1.34e-35	1.87533e-35	16977.8	12.4173
11 - 59	2.3404e-35	3.27134e-35	16977.8	12.3723
12 - 59	5.85171e-162	1.42257e-161	16977.8	27.2948
14 - 59	6.78908e-19	8.55651e-19	16977.8	8.80779
15 - 59	0	0	16977.8	46.9795
16 - 59	0	0	16977.8	38.5393
17 - 59	0	0	16977.8	58.1415
18 - 59	3.70862e-145	8.57239e-145	16977.8	25.7983
19 - 59	0.0129152	0.0136408	16977.8	2.22889
21 - 59	3.85428e-29	5.1943e-29	16977.8	11.1575
23 - 59	2.77495e-17	3.45109e-17	16977.8	-8.3804
24 - 59	0	0	16977.8	47.6073
25 - 59	3.38768e-13	4.08258e-13	16977.8	7.18769
26 - 59	0	0	16977.8	54.0512
27 - 59	0	0	16977.8	46.6832
28 - 59	0	0	16977.8	60.5076
29 - 59	2.21862e-49	3.34127e-49	16977.8	-14.7575
30 - 59	1.69792e-09	1.9684e-09	16977.8	5.91335
31 - 59	2.22977e-43	3.27497e-43	16977.8	-13.7859
32 - 59	0	0	16977.8	40.4394
33 - 59	4.36108e-203	1.21165e-202	16977.8	30.6689
34 - 59	1.11888e-18	1.40859e-18	16977.8	8.75142
35 - 59	2.50838e-84	4.47698e-84	16977.8	19.4961
38 - 59	0	0	16977.8	57.2052
40 - 59	0	0	16977.8	55.402
41 - 59	5.05231e-23	6.52061e-23	16977.8	9.8205
42 - 59	2.32429e-287	8.68146e-287	16977.8	36.6896
43 - 59	0	0	16977.8	39.4304
44 - 59	3.21169e-71	5.40715e-71	16977.8	17.8623
45 - 59	2.01709e-11	2.38249e-11	16977.8	-6.60577
46 - 59	1.50382e-253	5.01867e-253	16977.8	34.3897
47 - 59	0	0	16977.8	38.6028
49 - 59	0.0906552	0.0927099	16977.8	-1.33677
5 - 59	5.27386e-65	8.62161e-65	16977.8	-17.0348
52 - 59	0	0	16977.8	43.1112
53 - 59	0	0	16977.8	43.1437
55 - 59	7.79378e-30	1.05539e-29	16977.8	-11.2994
57 - 59	3.71945e-06	4.17467e-06	16977.8	-4.48168
58 - 59	0	0	16977.8	56.8813
10 - 61	0	0	16977.8	-38.9554
11 - 61	0	0	16977.8	-46.6276
12 - 61	4.4144e-174	1.12403e-173	16977.8	-28.3283
14 - 61	0	0	16977.8	-54.4264
15 - 61	1.8221e-74	3.11887e-74	16977.8	-18.2801
16 - 61	1.85039e-113	3.71395e-113	16977.8	-22.7237
17 - 61	0.00831238	0.00883729	16977.8	-2.39506
18 - 61	2.3079e-268	8.05979e-268	16977.8	-35.414
19 - 61	0	0	16977.8	-55.155
21 - 61	0	0	16977.8	-46.2394
23 - 61	0	0	16977.8	-66.4708
24 - 61	0.037758	0.0391461	16977.8	-1.77739
25 - 61	0	0	16977.8	-56.7786
26 - 61	4.58821e-12	5.44217e-12	16977.8	-6.82212
27 - 61	2.7484e-13	3.31927e-13	16977.8	-7.21626
28 - 61	0.0137427	0.0145011	16977.8	-2.20468
29 - 61	0	0	16977.8	-78.9939
30 - 61	0	0	16977.8	-52.1719
31 - 61	0	0	16977.8	-76.8858
32 - 61	4.09321e-143	9.32755e-143	16977.8	-25.6107
33 - 61	5.02842e-118	1.02755e-117	16977.8	-23.1905
34 - 61	0	0	16977.8	-53.6466
35 - 61	0	0	16977.8	-38.4803
38 - 61	4.27042e-06	4.78355e-06	16977.8	-4.45209
40 - 61	2.38601e-07	2.72136e-07	16977.8	-5.03659
41 - 61	0	0	16977.8	-49.7658
42 - 61	7.82567e-209	2.22352e-208	16977.8	-31.1132
43 - 61	3.39332e-97	6.40078e-97	16977.8	-20.9807
44 - 61	4.02673e-192	1.06623e-191	16977.8	-29.8042
45 - 61	0	0	16977.8	-68.3738
46 - 61	9.84344e-195	2.64367e-194	16977.8	-30.0123
47 - 61	5.72678e-88	1.04359e-87	16977.8	-19.927
49 - 61	0	0	16977.8	-62.5214
5 - 61	0	0	16977.8	-80.2865
52 - 61	1.15236e-47	1.72624e-47	16977.8	-14.4863
53 - 61	8.51166e-39	1.21534e-38	16977.8	-12.9968
55 - 61	0	0	16977.8	-70.6934
57 - 61	0	0	16977.8	-67.8485
58 - 61	6.52302e-10	7.58553e-10	16977.8	-6.06913
59 - 61	0	0	16977.8	-61.7562
10 - 62	5.10433e-09	5.91138e-09	16977.8	-5.72917
11 - 62	5.01581e-18	6.27254e-18	16977.8	-8.58
12 - 62	8.99134e-12	1.06536e-11	16977.8	6.72465
14 - 62	2.71032e-41	3.93468e-41	16977.8	-13.4325
15 - 62	1.15416e-98	2.19914e-98	16977.8	21.1438
16 - 62	7.60472e-51	1.15452e-50	16977.8	14.9854
17 - 62	5.12926e-245	1.65782e-244	16977.8	33.7869
18 - 62	0.00102871	0.00111362	16977.8	3.08214
19 - 62	4.93504e-68	8.17433e-68	16977.8	-17.4428
21 - 62	3.9302e-20	4.99804e-20	16977.8	-9.12279
23 - 62	2.37688e-164	5.84122e-164	16977.8	-27.5016
24 - 62	5.01144e-178	1.28768e-177	16977.8	28.6571
25 - 62	3.89209e-52	5.96506e-52	16977.8	-15.1833
26 - 62	1.23125e-191	3.25258e-191	16977.8	29.7654
27 - 62	1.11066e-145	2.58315e-145	16977.8	25.8462
28 - 62	1.31859e-262	4.50719e-262	16977.8	35.0191
29 - 62	1.0898e-264	3.75932e-264	16977.8	-35.1624
30 - 62	2.91032e-46	4.31385e-46	16977.8	-14.2609
31 - 62	1.95308e-247	6.36726e-247	16977.8	-33.9588
32 - 62	5.63214e-49	8.45946e-49	16977.8	14.694
33 - 62	1.27137e-26	1.68521e-26	16977.8	10.6269
34 - 62	7.70647e-40	1.11162e-39	16977.8	-13.1805
35 - 62	0.0621156	0.0638709	16977.8	-1.53731
38 - 62	9.63689e-226	2.91432e-225	16977.8	32.3879
40 - 62	1.77416e-210	5.05367e-210	16977.8	31.2393
41 - 62	3.39468e-29	4.58038e-29	16977.8	-11.1688
42 - 62	8.01549e-26	1.05872e-25	16977.8	10.453
43 - 62	6.29354e-59	9.97066e-59	16977.8	16.1861
44 - 62	0.203403	0.206888	16977.8	0.82954
45 - 62	4.74187e-159	1.14536e-158	16977.8	-27.0413
46 - 62	8.07512e-23	1.03981e-22	16977.8	9.77294
47 - 62	4.56309e-59	7.23934e-59	16977.8	16.2061
49 - 62	7.63055e-107	1.49692e-106	16977.8	-22.0307
5 - 62	6.69328e-291	2.52509e-290	16977.8	-36.923
52 - 62	3.75458e-96	7.05861e-96	16977.8	20.8641
53 - 62	4.37931e-102	8.42979e-102	16977.8	21.5189
55 - 62	4.67212e-202	1.29488e-201	16977.8	-30.5887
57 - 62	3.00725e-143	6.86676e-143	16977.8	-25.6231
58 - 62	9.63485e-214	2.80106e-213	16977.8	31.4882
59 - 62	2.41052e-97	4.55456e-97	16977.8	-20.9973
61 - 62	1.13399e-286	4.22157e-286	16977.8	36.6441
10 - 63	5.4526e-27	7.25298e-27	16977.8	10.706
11 - 63	1.55809e-25	2.05079e-25	16977.8	10.3895
12 - 63	3.23008e-145	7.48158e-145	16977.8	25.8038
14 - 63	3.21485e-11	3.77745e-11	16977.8	6.53626
15 - 63	0	0	16977.8	45.9291
16 - 63	5.38996e-296	2.05401e-295	16977.8	37.2565
17 - 63	0	0	16977.8	57.3371
18 - 63	9.08071e-128	1.92901e-127	16977.8	24.1577
19 - 63	0.49906	0.49906	16977.8	0.00235564
21 - 63	1.96509e-20	2.50183e-20	16977.8	9.19784
23 - 63	2.15339e-28	2.88825e-28	16977.8	-11.0027
24 - 63	0	0	16977.8	46.587
25 - 63	7.20034e-07	8.14642e-07	16977.8	4.82055
26 - 63	0	0	16977.8	53.1559
27 - 63	0	0	16977.8	45.622
28 - 63	0	0	16977.8	59.7846
29 - 63	2.01736e-73	3.42709e-73	16977.8	-18.1467
30 - 63	8.22729e-05	9.04521e-05	16977.8	3.7686
31 - 63	6.57174e-65	1.07278e-64	16977.8	-17.0218
32 - 63	0	0	16977.8	39.1955
33 - 63	1.09544e-185	2.87362e-185	16977.8	29.2857
34 - 63	3.73614e-11	4.38539e-11	16977.8	6.5137
35 - 63	2.24563e-70	3.76386e-70	16977.8	17.7521
38 - 63	0	0	16977.8	56.3909
40 - 63	0	0	16977.8	54.5346
41 - 63	5.34043e-15	6.52654e-15	16977.8	7.7356
42 - 63	5.47744e-267	1.90109e-266	16977.8	35.32
43 - 63	0	0	16977.8	38.176
44 - 63	2.92311e-60	4.65715e-60	16977.8	16.376
45 - 63	2.67639e-21	3.419e-21	16977.8	-9.41046
46 - 63	1.33267e-233	4.14119e-233	16977.8	32.9649
47 - 63	2.76104e-297	1.05934e-296	16977.8	37.3406
49 - 63	4.98575e-05	5.49749e-05	16977.8	-3.89191
5 - 63	1.77079e-92	3.27988e-92	16977.8	-20.4485
52 - 63	0	0	16977.8	41.9598
53 - 63	0	0	16977.8	42.0002
55 - 63	2.01832e-45	2.98774e-45	16977.8	-14.124
57 - 63	1.43315e-13	1.73268e-13	16977.8	-7.30451
58 - 63	0	0	16977.8	56.0737
59 - 63	0.00560348	0.00599121	16977.8	-2.53637
61 - 63	0	0	16977.8	61.0486
62 - 63	1.01741e-82	1.80446e-82	16977.8	19.3029
10 - 64	4.56946e-41	6.60814e-41	16977.8	-13.3935
11 - 64	1.15136e-64	1.87678e-64	16977.8	-16.9885
12 - 64	0.0224677	0.0235317	16977.8	-2.00536
14 - 64	1.75813e-106	3.443e-106	16977.8	-21.9921
15 - 64	1.32593e-25	1.74726e-25	16977.8	10.405
16 - 64	1.61595e-07	1.84681e-07	16977.8	5.11079
17 - 64	8.61571e-118	1.75424e-117	16977.8	23.1668
18 - 64	3.0572e-10	3.56621e-10	16977.8	-6.18989
19 - 64	6.95435e-139	1.54116e-138	16977.8	-25.2181
21 - 64	3.46378e-67	5.71221e-67	16977.8	-17.3298
23 - 64	4.24944e-259	1.44815e-258	16977.8	-34.7765
24 - 64	4.71976e-89	8.65674e-89	16977.8	20.0536
25 - 64	4.02581e-123	8.37844e-123	16977.8	-23.7011
26 - 64	2.03922e-82	3.60539e-82	16977.8	19.2664
27 - 64	6.92884e-62	1.11335e-61	16977.8	16.6045
28 - 64	4.08879e-126	8.57278e-126	16977.8	23.9962
29 - 64	0	0	16977.8	-42.3196
30 - 64	3.81822e-109	7.52963e-109	16977.8	-22.274
31 - 64	0	0	16977.8	-41.1446
32 - 64	1.40221e-05	1.55986e-05	16977.8	4.18957
33 - 64	0.0240377	0.025106	16977.8	1.9768
34 - 64	1.55134e-103	3.00672e-103	16977.8	-21.6762
35 - 64	1.27604e-24	1.66787e-24	16977.8	-10.1861
38 - 64	2.71205e-103	5.24733e-103	16977.8	21.65
40 - 64	4.37825e-95	8.19016e-95	16977.8	20.7443
41 - 64	2.30525e-84	4.12095e-84	16977.8	-19.5005
42 - 64	0.48572	0.486583	16977.8	-0.0358026
43 - 64	9.43961e-11	1.10685e-10	16977.8	6.37285
44 - 64	2.07847e-11	2.44985e-11	16977.8	-6.60133
45 - 64	8.20913e-257	2.78075e-256	16977.8	-34.6176
46 - 64	0.400916	0.40306	16977.8	-0.250978
47 - 64	1.41675e-11	1.67691e-11	16977.8	6.658
49 - 64	4.45144e-193	1.18425e-192	16977.8	-29.8805
5 - 64	0	0	16977.8	-43.8993
52 - 64	1.36702e-29	1.84892e-29	16977.8	11.2497
53 - 64	6.83166e-34	9.42068e-34	16977.8	12.0967
55 - 64	6.08676e-304	2.37573e-303	16977.8	-37.7715
57 - 64	9.92826e-240	3.15467e-239	16977.8	-33.4085
58 - 64	1.05346e-93	1.96414e-93	16977.8	20.5881
59 - 64	1.11659e-181	2.88879e-181	16977.8	-28.9584
61 - 64	4.00414e-144	9.18023e-144	16977.8	25.7036
62 - 64	2.05092e-18	2.57335e-18	16977.8	-8.68258
63 - 64	1.3167e-164	3.24289e-164	16977.8	-27.5237
10 - 69	1.8744e-271	6.6698e-271	16977.8	-35.6243
11 - 69	0	0	16977.8	-42.5359
12 - 69	1.60672e-136	3.5329e-136	16977.8	-24.9962
14 - 69	0	0	16977.8	-49.7301
15 - 69	3.35872e-49	5.05151e-49	16977.8	-14.7293
16 - 69	3.68312e-82	6.50166e-82	16977.8	-19.2353
17 - 69	0.309374	0.312981	16977.8	0.497631
18 - 69	2.26289e-214	6.59571e-214	16977.8	-31.536
19 - 69	0	0	16977.8	-50.9082
21 - 69	0	0	16977.8	-42.2782
23 - 69	0	0	16977.8	-61.7648
24 - 69	0.256546	0.260003	16977.8	0.654041
25 - 69	0	0	16977.8	-51.9292
26 - 69	7.2592e-05	7.98866e-05	16977.8	-3.79975
27 - 69	3.74206e-06	4.19587e-06	16977.8	-4.48038
28 - 69	0.222167	0.225567	16977.8	0.764906
29 - 69	0	0	16977.8	-73.1209
30 - 69	0	0	16977.8	-47.9674
31 - 69	0	0	16977.8	-71.2381
32 - 69	1.72719e-104	3.3591e-104	16977.8	-21.7789
33 - 69	2.37882e-89	4.37021e-89	16977.8	-20.0882
34 - 69	0	0	16977.8	-49.047
35 - 69	3.18022e-258	1.08051e-257	16977.8	-34.7159
38 - 69	0.0718922	0.0738564	16977.8	-1.46189
40 - 69	0.0188121	0.0197764	16977.8	-2.07904
41 - 69	0	0	16977.8	-45.5252
42 - 69	1.78074e-158	4.29203e-158	16977.8	-26.991
43 - 69	4.01327e-69	6.6967e-69	16977.8	-17.5874
44 - 69	1.18979e-157	2.84943e-157	16977.8	-26.9186
45 - 69	0	0	16977.8	-63.241
46 - 69	1.03431e-148	2.42055e-148	16977.8	-26.1216
47 - 69	2.79323e-62	4.49466e-62	16977.8	-16.6596
49 - 69	0	0	16977.8	-57.6811
5 - 69	0	0	16977.8	-74.4584
52 - 69	2.2568e-30	3.0597e-30	16977.8	-11.4083
53 - 69	6.56457e-24	8.54076e-24	16977.8	-10.0249
55 - 69	0	0	16977.8	-65.6981
57 - 69	0	0	16977.8	-62.5852
58 - 69	0.00142559	0.00154029	16977.8	-2.98364
59 - 69	0	0	16977.8	-56.8953
61 - 69	0.00201829	0.00216822	16977.8	2.87556
62 - 69	1.75457e-233	5.43724e-233	16977.8	-32.9562
63 - 69	0	0	16977.8	-56.056
64 - 69	3.00095e-111	5.93872e-111	16977.8	-22.4944
10 - 7	2.06784e-05	2.29579e-05	16977.8	-4.1005
11 - 7	1.79835e-11	2.12635e-11	16977.8	-6.62279
12 - 7	2.26674e-16	2.79747e-16	16977.8	8.12885
14 - 7	4.31158e-29	5.80365e-29	16977.8	-11.1474
15 - 7	1.01836e-108	2.00472e-108	16977.8	22.2292
16 - 7	2.8989e-59	4.60557e-59	16977.8	16.2343
17 - 7	4.7057e-255	1.57977e-254	16977.8	34.495
18 - 7	1.25046e-06	1.41052e-06	16977.8	4.70915
19 - 7	1.52844e-52	2.34569e-52	16977.8	-15.2451
21 - 7	3.06979e-13	3.70345e-13	16977.8	-7.20116
23 - 7	1.45519e-135	3.1811e-135	16977.8	-24.9058
24 - 7	4.63525e-188	1.21878e-187	16977.8	29.4779
25 - 7	1.0893e-37	1.54947e-37	16977.8	-12.799
26 - 7	5.63828e-202	1.55882e-201	16977.8	30.5823
27 - 7	1.02381e-155	2.4364e-155	16977.8	26.748
28 - 7	2.40563e-272	8.61443e-272	16977.8	35.6848
29 - 7	1.28454e-218	3.80305e-218	16977.8	-31.8565
30 - 7	3.87177e-34	5.35216e-34	16977.8	-12.1435
31 - 7	1.3156e-204	3.6642e-204	16977.8	-30.7871
32 - 7	1.19821e-57	1.88505e-57	16977.8	16.0019
33 - 7	7.51057e-33	1.03065e-32	16977.8	11.8971
34 - 7	4.43955e-28	5.93342e-28	16977.8	-10.9369
35 - 7	0.435877	0.437428	16977.8	0.161433
38 - 7	6.9176e-236	2.17355e-235	16977.8	33.1309
40 - 7	9.52644e-221	2.84281e-220	16977.8	32.0162
41 - 7	4.74005e-20	6.02115e-20	16977.8	-9.1024
42 - 7	4.87454e-33	6.6973e-33	16977.8	11.9333
43 - 7	1.22894e-67	2.03262e-67	16977.8	17.39
44 - 7	0.0139578	0.0147144	16977.8	2.1986
45 - 7	7.60222e-129	1.63029e-128	16977.8	-24.2624
46 - 7	1.69238e-29	2.28624e-29	16977.8	11.2308
47 - 7	1.22945e-67	2.03048e-67	16977.8	17.39
49 - 7	2.83336e-84	5.04902e-84	16977.8	-19.4898
5 - 7	2.3697e-242	7.57228e-242	16977.8	-33.5967
52 - 7	9.90577e-106	1.93317e-105	16977.8	21.912
53 - 7	1.11324e-111	2.2108e-111	16977.8	22.5393
55 - 7	8.60993e-168	2.13921e-167	16977.8	-27.7965
57 - 7	2.1562e-114	4.34321e-114	16977.8	-22.8199
58 - 7	6.23717e-224	1.87115e-223	16977.8	32.2536
59 - 7	5.67061e-76	9.73584e-76	16977.8	-18.4709
61 - 7	3.38022e-296	1.2925e-295	16977.8	37.2697
62 - 7	0.0502117	0.0517722	16977.8	1.64287
63 - 7	5.04095e-63	8.14641e-63	16977.8	-16.7628
64 - 7	7.14768e-24	9.28869e-24	16977.8	10.0165
69 - 7	1.23224e-243	3.94878e-243	16977.8	33.6885
10 - 71	1.50368e-12	1.79297e-12	16977.8	-6.98086
11 - 71	4.89164e-24	6.37892e-24	16977.8	-10.0541
12 - 71	1.7992e-08	2.0667e-08	16977.8	5.51124
14 - 71	1.59056e-51	2.42782e-51	16977.8	-15.0899
15 - 71	3.80669e-88	6.94813e-88	16977.8	19.9478
16 - 71	2.82777e-43	4.14789e-43	16977.8	13.7687
17 - 71	2.99605e-231	9.20856e-231	16977.8	32.7932
18 - 71	0.0432079	0.0447142	16977.8	1.71468
19 - 71	3.50105e-80	6.13227e-80	16977.8	-18.9942
21 - 71	2.49966e-26	3.30553e-26	16977.8	-10.5634
23 - 71	6.57148e-185	1.71589e-184	16977.8	-29.2224
24 - 71	3.3889e-167	8.38308e-167	16977.8	27.7457
25 - 71	6.02369e-64	9.79066e-64	16977.8	-16.8901
26 - 71	7.62005e-179	1.96242e-178	16977.8	28.7248
27 - 71	5.53144e-135	1.20453e-134	16977.8	24.8509
28 - 71	2.81406e-248	9.20074e-248	16977.8	34.0184
29 - 71	6.15615e-296	2.33809e-295	16977.8	-37.2527
30 - 71	3.49173e-56	5.48561e-56	16977.8	-15.7884
31 - 71	1.06092e-276	3.83564e-276	16977.8	-35.9789
32 - 71	4.19167e-41	6.07738e-41	16977.8	13.3999
33 - 71	1.2888e-21	1.65013e-21	16977.8	9.48723
34 - 71	1.00908e-49	1.52375e-49	16977.8	-14.811
35 - 71	0.0018937	0.00203825	16977.8	-2.89562
38 - 71	3.65795e-212	1.05529e-211	16977.8	31.368
40 - 71	2.37746e-197	6.43111e-197	16977.8	30.2194
41 - 71	4.15874e-37	5.87852e-37	16977.8	-12.6939
42 - 71	6.3907e-20	8.10879e-20	16977.8	9.0698
43 - 71	6.38205e-51	9.7021e-51	16977.8	14.9971
44 - 71	0.391461	0.394609	16977.8	-0.275517
45 - 71	9.29481e-181	2.39921e-180	16977.8	-28.8827
46 - 71	1.71586e-17	2.1363e-17	16977.8	8.43695
47 - 71	3.04977e-51	4.64257e-51	16977.8	15.0465
49 - 71	8.59434e-124	1.79194e-123	16977.8	-23.7675
5 - 71	0	0	16977.8	-39.0092
52 - 71	1.26641e-86	2.28928e-86	16977.8	19.769
53 - 71	1.67383e-92	3.10539e-92	16977.8	20.4513
55 - 71	5.52101e-226	1.67411e-225	16977.8	-32.4058
57 - 71	2.88774e-164	7.08125e-164	16977.8	-27.4943
58 - 71	3.19047e-200	8.79915e-200	16977.8	30.4453
59 - 71	1.43162e-113	2.87855e-113	16977.8	-22.7352
61 - 71	4.01697e-272	1.4339e-271	16977.8	35.6697
62 - 71	0.0914286	0.0934162	16977.8	-1.33205
63 - 71	5.49023e-98	1.04259e-97	16977.8	-21.0687
64 - 71	3.0964e-14	3.75968e-14	16977.8	7.50826
69 - 71	5.13557e-220	1.52445e-219	16977.8	31.9614
7 - 71	0.0015779	0.00170323	16977.8	-2.95243
10 - 9	5.10389e-100	9.74143e-100	16977.8	-21.2931
11 - 9	1.38006e-140	3.0887e-140	16977.8	-25.3768
12 - 9	3.35717e-28	4.49215e-28	16977.8	-10.9624
14 - 9	6.36772e-199	1.74339e-198	16977.8	-30.3432
15 - 9	0.359238	0.362451	16977.8	-0.360502
16 - 9	5.28407e-07	5.98436e-07	16977.8	-4.88197
17 - 9	1.40382e-34	1.95014e-34	16977.8	12.2267
18 - 9	4.79267e-54	7.426e-54	16977.8	-15.4717
19 - 9	2.39921e-233	7.41453e-233	16977.8	-32.9463
21 - 9	1.31665e-142	2.97631e-142	16977.8	-25.5639
23 - 9	0	0	16977.8	-41.8944
24 - 9	8.97035e-28	1.19463e-27	16977.8	10.8726
25 - 9	3.95667e-220	1.1776e-219	16977.8	-31.9699
26 - 9	1.02819e-17	1.28438e-17	16977.8	8.4968
27 - 9	2.40044e-12	2.85321e-12	16977.8	6.91473
28 - 9	3.05237e-37	4.32004e-37	16977.8	12.7182
29 - 9	0	0	16977.8	-49.0715
30 - 9	1.09431e-197	2.97441e-197	16977.8	-30.246
31 - 9	0	0	16977.8	-47.9673
32 - 9	2.08453e-10	2.43663e-10	16977.8	-6.25008
33 - 9	1.44093e-12	1.72362e-12	16977.8	-6.98686
34 - 9	1.63159e-194	4.36121e-194	16977.8	-29.9948
35 - 9	1.61905e-79	2.82707e-79	16977.8	-18.9124
38 - 9	1.05867e-26	1.40657e-26	16977.8	10.6441
40 - 9	1.39529e-23	1.80907e-23	16977.8	9.94989
41 - 9	1.80283e-167	4.46943e-167	16977.8	-27.7692
42 - 9	2.33784e-25	3.07352e-25	16977.8	-10.3506
43 - 9	0.000159586	0.000175281	16977.8	-3.59972
44 - 9	3.26988e-47	4.87242e-47	16977.8	-14.4139
45 - 9	0	0	16977.8	-41.9239
46 - 9	8.23376e-25	1.07996e-24	16977.8	-10.2288
47 - 9	0.000927122	0.00100461	16977.8	-3.11297
49 - 9	4.75479e-300	1.84309e-299	16977.8	-37.52
5 - 9	0	0	16977.8	-50.4882
52 - 9	0.0902024	0.0923305	16977.8	1.33955
53 - 9	0.00995742	0.0105465	16977.8	2.3281
55 - 9	0	0	16977.8	-44.7309
57 - 9	0	0	16977.8	-40.8828
58 - 9	1.44575e-21	1.84899e-21	16977.8	9.4752
59 - 9	1.69815e-287	6.36384e-287	16977.8	-36.6987
61 - 9	1.7247e-47	2.57677e-47	16977.8	14.4584
62 - 9	3.21771e-68	5.34548e-68	16977.8	-17.4676
63 - 9	2.90418e-269	1.01737e-268	16977.8	-35.4754
64 - 9	1.80246e-19	2.27935e-19	16977.8	-8.95574
69 - 9	8.18866e-32	1.11961e-31	16977.8	11.6948
7 - 9	1.68253e-76	2.89313e-76	16977.8	-18.5373
71 - 9	1.05972e-60	1.69315e-60	16977.8	-16.4383
